# Supplementary material for: Crystallographic characterisation and development of bi-substrate inhibitors of coronavirus nsp14 methyltransferase
Source: Royal Society of Chemistry journal article supplement (doi:10.1039/d5md00896d), 2026-01-01
Supplement: d5md00896d1.pdf [file d5md00896d1.pdf]

## Supporting Information

### Table of Contents

|        |                                                                     |    |
|--------|---------------------------------------------------------------------|----|
| 1.     | Chemical Synthesis.....                                             | 3  |
| 1.1    | Solvents and Reagents .....                                         | 3  |
| 1.2    | Chromatography .....                                                | 3  |
| 1.3    | NMR Spectroscopy.....                                               | 3  |
| 1.4    | Optical Rotations.....                                              | 3  |
| 1.5    | Reverse Phase HPLC conditions for the LCMS Analytical Methods ..... | 3  |
| 1.6    | Reverse Phase HPLC conditions for the HRMS Analytical Methods ..... | 4  |
| 1.7    | Preparative Reverse Phase HPLC conditions.....                      | 5  |
| 1.8    | Supercritical Fluid Chromatography Analytical Methods .....         | 6  |
| 1.9    | Synthetic Procedures .....                                          | 6  |
| 1.9.1  | Synthesis of compounds 1-3, 7-17, 23 and 24.....                    | 6  |
| 1.9.2  | Synthesis of compounds 4 and 6 .....                                | 35 |
| 1.9.3  | Synthesis of compounds 18 and 19 .....                              | 36 |
| 1.9.4  | Synthesis of compounds 20-22 .....                                  | 39 |
| 1.9.5  | Synthesis of compounds 25 and 33 .....                              | 46 |
| 1.9.6  | Synthesis of compounds 26 and 27 .....                              | 49 |
| 1.9.7  | Synthesis of compound 27.....                                       | 59 |
| 1.9.8  | Synthesis of compound 29.....                                       | 63 |
| 1.9.9  | Synthesis of compounds 30 and 31 .....                              | 68 |
| 1.9.10 | Synthesis of compound 32.....                                       | 70 |
| 1.9.11 | Synthesis of compound 34.....                                       | 72 |
| 1.9.12 | Synthesis of compounds 35-38.....                                   | 77 |
| 1.9.13 | Synthesis of compounds 39 and 40 .....                              | 84 |
| 2      | Supplementary Information.....                                      | 88 |

|     |                                                                              |    |
|-----|------------------------------------------------------------------------------|----|
| 2.1 | Crystallography table .....                                                  | 88 |
| 2.2 | ADME Summary Tables .....                                                    | 90 |
| 2.3 | Repeats in biochemical assays .....                                          | 93 |
| 2.4 | MERS AlphaFold2 model.....                                                   | 94 |
| 2.5 | RNMT structure overlay with SARS-CoV-2 nsp14 in complex with compound 1 .... | 95 |
| 2.6 | Substrate competition experiments with compound 26.....                      | 96 |
| 2.7 | Comparison of electron densities .....                                       | 97 |
| 3   | Appendix .....                                                               | 99 |
| 3.1 | QC Spectra for Compounds.....                                                | 99 |

## 1. Chemical Synthesis

### 1.1 Solvents and Reagents

All starting materials and solvents were obtained from standard chemical suppliers. Dry solvents were purchased in sure sealed bottles stored over molecular sieves. Organic solutions were routinely dried over anhydrous sodium sulfate or magnesium sulfate.

### 1.2 Chromatography

Thin-layer chromatography (TLC) was performed on pre-coated silica gel plates (Kieselgel 60 F254, BDH). Visualization of the developed chromatogram was achieved by using fluorescence quenching and/or by staining with potassium permanganate. Column chromatography purification was performed on prepacked silica gel (230–400 mesh, 40–63  $\mu\text{m}$ ) cartridges. Reverse column chromatography was performed on SWPAFLASH® SW040 Bonded Spherical C18 (20-45 $\mu\text{m}$ , 100 Å). All compounds are >95% pure by HPLC analysis.

### 1.3 NMR Spectroscopy

All  $^1\text{H}$  NMR spectra were recorded on a Bruker Avance III 400 MHz. Chemical shifts ( $\delta$ ) are expressed in ppm recorded using the residual undeuterated solvent as the internal reference in all cases. Signal splitting patterns are described as singlet (s), doublet (d), triplet (t), quartet (q), multiplet (m), broad (br), or a combination. Coupling constants (J) are quoted to the nearest 0.1 Hz.

### 1.4 Optical Rotations

Optical rotations were taken using a Perkin Elmer 343 polarimeter and  $[\alpha]_{\text{D}}$  values are given in  $\text{deg dm}^{-1} \text{cm}^3 \text{g}^{-1}$ .

### 1.5 Reverse Phase HPLC conditions for the LCMS Analytical Methods

**Method 1:** Agilent 1200\G6110A Kinetex EVO C18 2.1  $\times$  30 mm, 5  $\mu\text{m}$  at 40  $^{\circ}\text{C}$ ; Mobile Phase: A: 0.0375% TFA in water (v/v); B: 0.01875% TFA in Acetonitrile; flow rate held at 1.5 mL/min; eluted with the mobile phase over 1.50 min employing UV detection at 220&254 nm. Gradient information: 0.01-0.80 min, ramped from 95% A-5% B to 5% A-95% B; 0.80-1.20 min, held at 5% A-95% B; 1.20-1.21 min, returned to 95% A-5% B, 1.21-1.5 min, held at 95% A-5% B.

**Method 2:** SHIMADZU LCMS-2020 Kinetex EVO C18 2.1  $\times$  30 mm, 5  $\mu\text{m}$  at 40  $^{\circ}\text{C}$ ; Mobile Phase: A: 0.025%  $\text{NH}_3\cdot\text{H}_2\text{O}$  in Water (v/v); B: Acetonitrile; flow rate held at 1.5 mL/min; eluted with the mobile phase over 1.55 min employing UV detection at 220&254 nm. Gradient information: 0-0.80 min, ramped from 95% A-5% B to 5% A-95% B; 0.80-1.20 min, held at 5%

A-95% B; 1.20-1.21 min, returned to 95% A-5% B, 1.21-1.55 min, held at 95% A-5% B.

**Method 3:** SHIMADZU LCMS-2020 Kinetex EVO C18 2.1 × 30 mm, 5 µm at 50 °C; Mobile Phase: A: 0.0375% TFA in water (v/v); B: 0.01875% TFA in Acetonitrile; flow rate held at 1.5 mL/min; eluted with the mobile phase over 1.55 min employing UV detection at 220&254 nm. Gradient information: 0-0.80 min, ramped from 95% A-5% B to 5% A-95% B; 0.80-1.20 min, held at 5% A-95% B; 1.20-1.21 min, returned to 95% A-5% B, 1.21-1.55 min, held at 95% A-5% B.

**Method 4:** SHIMADZU LCMS-2020 Kinetex EVO C18 2.1 × 30 mm, 5 µm at 50°C; Mobile Phase: A: 0.0375% TFA in water (v/v); B: 0.01875% TFA in Acetonitrile; flow rate held at 1.5 mL/min; eluted with the mobile phase over 1.55 min employing UV detection at 220&254 nm. Gradient information: 0-0.80 min, ramped from 100% A-0% B to 40% A-60% B; 0.80-1.20 min, held at 40% A-60% B; 1.20-1.21 min, returned to 100% A-0% B, 1.21-1.55 min, held at 100% A-0% B.

**Method 5:** SHIMADZU LCMS-2020 Kinetex EVO C18 2.1 × 30 mm, 5 µm at 40°C; Mobile Phase: A: 0.025% NH<sub>3</sub>·H<sub>2</sub>O in Water (v/v); B: Acetonitrile; flow rate held at 1.0 mL/min; eluted with the mobile phase over 2.00 min employing UV detection at 220&254 nm. Gradient information: 0-1.20 min, ramped from 100% A-0% B to 40% A-60% B; 1.20-1.60 min, held at 40% A-60% B; 1.60-1.61 min, returned to 100% A-0% B, 1.61-2.00 min, held at 100% A-0% B.

**Method 6:** Agilent 1200\G6110A Kinetex EVO C18 2.1 × 30 mm, 5 µm at 50°C; Mobile Phase: A: 0.0375% TFA in water (v/v); B: 0.01875% TFA in Acetonitrile; flow rate held at 1.5 mL/min; eluted with the mobile phase over 1.50 min employing UV detection at 220&254 nm. Gradient information: 0.01-0.80 min, ramped from 100% A-0% B to 40% A-60% B; 0.80-1.20 min, held at 40% A-60% B; 1.20-1.21 min, returned to 100% A-0% B, 1.21-1.55 min, held at 100% A-0% B.

**Method 7:** Agilent 1200\G6110A XBridge C18 2.1 × 50 mm, 5 µm at 50°C; Mobile Phase: A: 0.025% NH<sub>3</sub>·H<sub>2</sub>O in water (v/v); B: Acetonitrile; flow rate held at 1.0 mL/min; eluted with the mobile phase over 2.00 min employing UV detection at 220&254 nm. Gradient information: 0-1.20 min, ramped from 100% A-0% B to 40% A-60% B; 1.20-1.60 min, held at 40% A-60% B; 1.60-1.61 min, returned to 100% A-0% B, 1.61-2.00 min, held at 100% A-0% B.

## 1.6 Reverse Phase HPLC conditions for the HRMS Analytical Methods

**Method 1:** Agilent 1290 LC & Agilent G6530B Q-TOF Agilent ZORBAX Extend-C18 2.1 × 50 mm, 5 µm at 40 °C; Mobile Phase: A: 0.0375% TFA in water (v/v); B: 0.0188% TFA in Acetonitrile; flow rate held at 0.8 mL/min; eluted with the mobile phase over 4.50 min employing DAD detection. Gradient information: 0-0.40 min, held at 0% A-100% B; 0.40-3.40 min, ramped from 0% A-100% B to 10% A-90% B; 3.40-3.90 min, ramped from 10% A-90% B to 0% A-100% B; 3.91-4.00 min, returned to 0% A-100% B, 4.00-4.50 min, held at 0% A-100% B (flow rate held at 1.0 mL/min).



## 1.7 Preparative Reverse Phase HPLC conditions

**Method 1:** column: Waters Xbridge 150 x 25 mm x 5  $\mu$ m; mobile phase: [water ( $\text{NH}_4\text{HCO}_3$ )-ACN]; B%: 18%-48%, 10 min.

**Method 2:** column: Waters Xbridge 150 x 25 mm x 5  $\mu$ m; mobile phase: [water (ammonia hydroxide v/v)-ACN]; B%: 19%-49%, 9 min.

**Method 3:** column: Waters Xbridge 150 x 25 mm x 5  $\mu$ m; mobile phase: [water (ammonia hydroxide v/v)-ACN]; B%: 22%-52%, 9 min

**Method 4:** column: Waters Xbridge 150 x 25 mm x 5  $\mu$ m; mobile phase: [water (ammonia hydroxide v/v)-ACN]; gradient: 23%-53% B, 9 min

**Method 5:** column: Waters Xbridge 150 x 25 mm x 5  $\mu$ m; mobile phase: [water ( $\text{NH}_4\text{HCO}_3$ )-ACN]; B%: 10%-40%, 8 min

**Method 6:** column: Waters Xbridge 150 x 25 mm x 5  $\mu$ m; mobile phase: [water ( $\text{NH}_4\text{HCO}_3$ )-ACN]; B%: 7%-37%, 8 min

**Method 6:** column: Waters Xbridge 150 x 25 mm x 5  $\mu$ m; mobile phase: [water (ammonia hydroxide v/v)-ACN]; B%: 2%-30%, 9 min

**Method 7:** column: Waters Xbridge 150 x 25 mm x 5  $\mu$ m; mobile phase: [water ( $\text{NH}_4\text{HCO}_3$ )-ACN]; B%: 21%-51%, 10 min

**Method 8:** column: Waters Xbridge 150 x 25 mm x 5  $\mu$ m; mobile phase: [water (ammonia hydroxide v/v)-ACN]; B%: 15%-45%, 9 min

**Method 9:** column: Waters Xbridge 150 x 25 mm x 5  $\mu$ m; mobile phase: [water (ammonia hydroxide v/v)-ACN]; B%: 14%-44%, 9 min

**Method 10:** column: Phenomenex luna C18 150 x 25 mm x 10  $\mu$ m; mobile phase: [water(FA)-ACN]; B%: 20%-50%, 10 min

**Method 11:** column: Waters Xbridge 150 x 25 mm x 5  $\mu$ m; mobile phase: [water (ammonia hydroxide v/v)-ACN]; B%: 25%-55%, 9 min

**Method 12:** column: Waters Xbridge 150 x 25 mm x 5  $\mu$ m; mobile phase: [water (ammonia hydroxide v/v)-ACN]; B%: 18%-48%, 9 min

**Method 13:** column: Waters Xbridge 150 x 25 mm x 5  $\mu$ m; mobile phase: [water ( $\text{NH}_4\text{HCO}_3$ )-ACN]; gradient:22%-52% B, 10 min

**Method 14:** column: Waters Xbridge 150 x 25 mm x 5  $\mu$ m; mobile phase: [water ( $\text{NH}_4\text{HCO}_3$ )-ACN]; gradient: 23%-53% B, 9 min

**Method 15:** column: Waters Xbridge 150 x 25 mm x 5  $\mu$ m; mobile phase: [water ( $\text{NH}_4\text{HCO}_3$ )-ACN]; gradient: 26%-56% B, 9 min

**Method 16:** column: Waters Xbridge 150 x 25 mm x 5  $\mu$ m; mobile phase: [water ( $\text{NH}_4\text{HCO}_3$ )-

ACN]; gradient: 28%-58% B, 9 min

**Method 17:** column: Waters Xbridge 150 x 25 mm x 5  $\mu$ m; mobile phase: [water ( $\text{NH}_4\text{HCO}_3$ )-ACN]; gradient: 24%-54% B, 9 min

**Method 18:** column: Phenomenex C18 80 x 30 mm x 3  $\mu$ m; mobile phase: [water ( $\text{NH}_4\text{HCO}_3$ )-ACN]; gradient: 16%-46% B, 10 min

**Method 19:** column: Waters Xbridge 150 x 2.5 mm 10  $\mu$ m; mobile phase: [water ( $\text{NH}_4\text{HCO}_3$ )-ACN]; gradient: 15% - 45% B, 10 min.

## 1.8 Supercritical Fluid Chromatography Analytical Methods

**Method 1:** SHIMADZU LC-30ADsf; Column: Chiralcel OJ-3 50x4.6mm I.D., 3 $\mu$ m Mobile phase: Phase A for  $\text{CO}_2$ , and Phase B for MeOH (0.05%DEA); Gradient elution: MeOH (0.05% DEA) in  $\text{CO}_2$  from 5% to 40% Flow rate: 3mL/min; Detector: PDA Column Temp: 35°C; Back Pressure: 100Bar.

**Method 2:** SHIMADZU LC-30ADsf; Column: Chiralcel OD-3 50x4.6mm I.D., 3 $\mu$ m Mobile phase: Phase A for  $\text{CO}_2$ , and Phase B for MeOH (0.05%DEA); Gradient elution: MeOH (0.05% DEA) in  $\text{CO}_2$  from 5% to 40% Flow rate: 3mL/min; Detector: PDA Column Temp: 35°C; Back Pressure: 100Bar.

**Method 3:** SHIMADZU LC-30ADsf; Column: Chiralpak AD-3 50x4.6mm I.D., 3 $\mu$ m Mobile phase: Phase A for  $\text{CO}_2$ , and Phase B for MeOH (0.05%DEA); Gradient elution: MeOH (0.05% DEA) in  $\text{CO}_2$  from 5% to 40% Flow rate: 3mL/min; Detector: PDA Column Temp: 35°C; Back Pressure: 100Bar.

## 1.9 Synthetic Procedures

### 1.9.1 Synthesis of compounds 1-3, 7-17, 23 and 24

#### Scheme S1

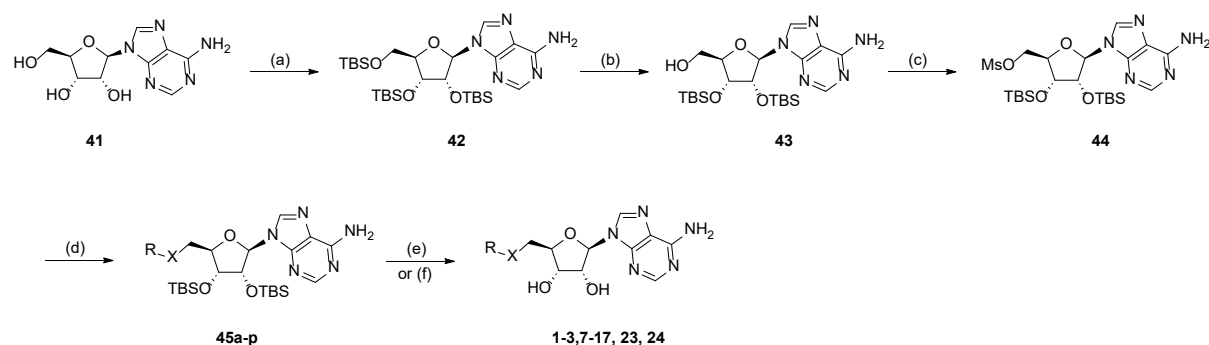

**9-[(2*R*,3*R*,4*R*,5*R*)-3,4-Bis[[*tert*-butyl(dimethyl)silyl]oxy]-5-[[*tert*-butyl(dimethyl)silyl]oxymethyl]tetrahydrofuran-2-yl]purin-6-amine (**42**)**

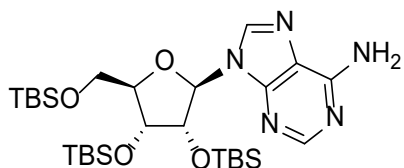

To a solution of (2*R*,3*R*,4*S*,5*R*)-2-(6-aminopurin-9-yl)-5-(hydroxymethyl)tetrahydrofuran-3,4-diol **41** (10.0 g, 37.4 mmol) in DMF (40 mL) was added 1*H*-imidazole (28.0 g, 411 mmol) and *tert*-butylchlorodimethylsilane (25.2 mL, 206 mmol). The resulting mixture was stirred at RT for 16 h. The reaction was quenched with water (200 mL) and extracted with EtOAc (3 x 100 mL). The combined organic layers were washed with brine (3 x 50 mL), dried over sodium sulfate, filtered, and concentrated under reduced pressure. The residue was purified by flash column chromatography (petroleum ether/ethyl acetate gradient 2-20%) to afford compound **42** (18.0 g, 79% yield) as a white solid. LCMS (ES<sup>+</sup>, Method 1) *m/z* 610.4 [M+H]<sup>+</sup>. <sup>1</sup>H NMR (400 MHz, CDCl<sub>3</sub>): δ 8.34 (s, 1H), 8.16 (s, 1H), 6.02 (d, *J* = 4.8 Hz, 1H), 5.79 (s, 2H), 4.69 (t, *J* = 4.8 Hz, 1H), 4.32 (t, *J* = 4.0 Hz, 1H), 4.15 - 4.13 (m, 1H), 4.03 (dd, *J* = 11.6, 4.0 Hz, 1H), 3.79 (dd, *J* = 11.6, 3.2 Hz, 1H), 0.96 (s, 9H), 0.93 (s, 9H), 0.80 (s, 9H), 0.14 (s, 3H), 0.13 (s, 3H), 0.11 (s, 3H), 0.10 (s, 3H), -0.04 (s, 3H), -0.22 (s, 3H).

**[(2*R*,3*R*,4*R*,5*R*)-5-(6-Aminopurin-9-yl)-3,4-bis[[*tert*-butyl(dimethyl)silyl]oxy]tetrahydrofuran-2-yl]methanol (**43**)**

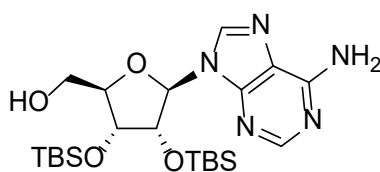

To a solution of compound **42** (10.0 g, 16.4 mmol) in THF (100 mL) was added dropwise a solution of trichloroacetic acid (26.8 g, 164 mmol) in water (30 mL) at 0 °C and stirred for 4 h. The reaction mixture was neutralized with sodium carbonate, diluted with water (100 mL) and extracted with EtOAc (3 x 50 mL). The combined organic layers were dried over sodium sulfate, filtered, and concentrated under reduced pressure. The residue was purified by flash column chromatography (petroleum ether/ethyl acetate gradient 2-20%) to afford compound **43** (5.00 g, 61% yield) as a white solid. LCMS (ES<sup>+</sup>, Method 2) *m/z* 496.4 [M+H]<sup>+</sup>. <sup>1</sup>H NMR (400 MHz, DMSO-*d*<sub>6</sub>): δ 8.40 (s, 1H), 8.14 (s, 1H), 7.38 (s, 2H), 5.90 (d, *J* = 7.2 Hz, 1H), 5.72 (dd, *J* = 8.0, 4.0

Hz, 1H), 4.91 (dd,  $J = 7.2, 4.4$  Hz, 1H), 4.30 (d,  $J = 4.4$  Hz, 1H), 3.99 (t,  $J = 2.8$  Hz, 1H), 3.76 - 3.72 (m, 1H), 3.62 - 3.59 (m, 1H), 0.93 (s, 9H), 0.70 (s, 9H), 0.13 (s, 3H), 0.12 (s, 3H), -0.04 (s, 3H), -0.13 (s, 3H), -0.46 (s, 3H).

**[(2*R*,3*R*,4*R*,5*R*)-5-(6-Aminopurin-9-yl)-3,4-bis[[tert-butyl(dimethyl)silyl] oxy] tetrahydrofuran-2-yl]methyl methanesulfonate (**44**)**

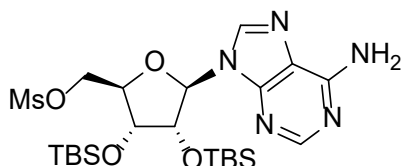

To a solution of compound **43** (1.00 g, 2.02 mmol) and triethylamine (842  $\mu$ L, 6.05 mmol) in THF (10 mL) was added dropwise a solution of methanesulfonic anhydride (422 mg, 2.42 mmol) in THF (5 mL) under  $N_2$  at 0 °C. The resulting mixture was warmed to RT and stirred for 2 h. The reaction was quenched with water (50 mL) and then extracted with EtOAc (3 x 30 mL). The combined organic layers were washed with brine (3 x 20 mL), dried over sodium sulfate, filtered, and concentrated under reduced pressure. The residue was purified by flash column chromatography (petroleum ether/ethyl acetate gradient 2-50%) to afford compound **44** (200 mg, 348  $\mu$ mol, 17% yield) as a white solid. LCMS ( $ES^+$ , Method 2)  $m/z$  574.2  $[M+H]^+$ .  $^1H$  NMR (400 MHz,  $CDCl_3$ ):  $\delta$  8.35 (s, 1H), 7.94 (s, 1H), 5.89 (d,  $J = 5.2$  Hz, 1H), 5.74 (s, 2H), 5.02 (t,  $J = 4.8$  Hz, 1H), 4.61 (dd,  $J = 11.2, 4.4$  Hz, 1H), 4.52 (dd,  $J = 11.2, 5.2$  Hz, 1H), 4.41 (t,  $J = 4.0$  Hz, 1H), 4.33 - 4.32 (m, 1H), 3.00 (s, 3H), 0.95 (s, 9H), 0.82 (s, 9H), 0.14 (s, 3H), 0.13 (s, 3H), -0.02 (s, 3H), -0.23 (s, 3H).

**9-[(2*R*,3*R*,4*R*,5*S*)-5-(1,3-Benzothiazol-2-ylsulfanylmethyl)-3,4-bis[[tert-butyl (dimethyl)silyl] oxy]tetrahydrofuran-2-yl]purin-6-amine (**45a**)**

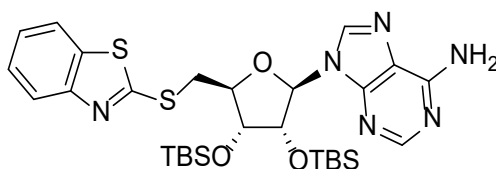

To a solution of compound **44** (100 mg, 174  $\mu$ mol) in DMF (2 mL) was added 1,3-benzothiazol-2-ylsulfanylsodium (49.5 mg, 261  $\mu$ mol). The resulting mixture was heated to 50 °C and stirred

for 16 h. The reaction was cooled to RT, quenched with water (20 mL) and extracted with EtOAc (3 x 10 mL). The combined organic layers were washed with brine (10 mL), dried over sodium sulfate, filtered, and concentrated under reduced pressure. The residue was purified by flash column chromatography (petroleum ether/ethyl acetate gradient 0-2%) to afford compound **45a** (70.0 mg, 62% yield) as a white solid LCMS (ES<sup>+</sup>, Method 2) *m/z* 645.5 [M+H]<sup>+</sup>.

**9-[(2*R*,3*R*,4*R*,5*S*)-3,4-Bis[[*tert*-butyl(dimethyl)silyl]oxy]-5-[(6-methyl-1,3-benzothiazol-2-yl)sulfanylmethyl]tetrahydrofuran-2-yl]purin-6-amine (45b)**

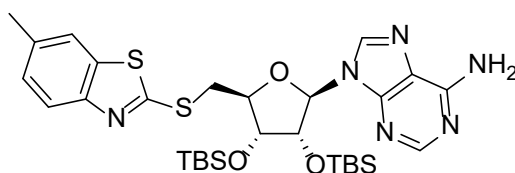

To a solution of 6-methyl-1,3-benzothiazole-2-thiol (63.2 mg, 348 μmol) in THF (2 mL) was added NaH (13.9 mg, 348 μmol, 60% dispersion in mineral oil) under inert atmosphere at 0 °C and the mixture was stirred for 30 min. A solution of compound **44** (100 mg, 174 μmol) in THF (1 mL) was then added and the resulting mixture was heated to 70 °C and stirred for 16 h. The reaction was cooled to RT, quenched with water (20 mL) and extracted with EtOAc (3 x 10 mL). The combined organic layers were washed with brine (10 mL), dried over sodium sulfate, filtered, and concentrated under reduced pressure. The residue was purified by flash column chromatography (petroleum ether/ethyl acetate gradient 2-50%) to afford compound **45b** (100 mg, 87% yield) as a white solid. LCMS (ES<sup>+</sup>, Method 3) *m/z* 659.3 [M+H]<sup>+</sup>. <sup>1</sup>H NMR (400 MHz, DMSO-*d*<sub>6</sub>): δ 8.45 (s, 1H), 8.16 (s, 1H), 7.80 (s, 1H), 7.69 (d, *J* = 8.0 Hz, 1H), 7.31 - 7.28 (m, 3H), 5.94 (d, *J* = 7.6 Hz, 1H), 5.24 (dd, *J* = 7.6, 4.4 Hz, 1H), 4.44 (d, *J* = 4.4 Hz, 1H), 4.30 (t, *J* = 7.2 Hz, 1H), 4.04 - 4.01 (m, 1H), 3.80 - 3.75 (m, 1H), 2.41 (s, 3H), 0.88 (s, 9H), 0.67 (s, 9H), 0.08 (s, 3H), 0.07 (s, 3H), -0.13 (s, 3H), -0.46 (s, 3H).

**9-[(2*R*,3*R*,4*R*,5*S*)-3,4-bis[[*tert*-butyl(dimethyl)silyl]oxy]-5-[(5-methyl-1,3-benzothiazol-2-yl)sulfanylmethyl]tetrahydrofuran-2-yl]purin-6-amine (45c)**

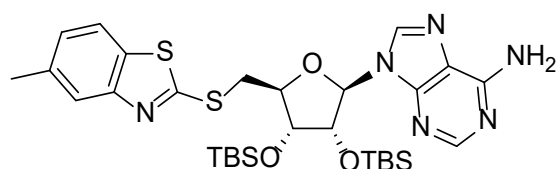

To a solution of 5-methyl-1,3-benzothiazole-2-thiol (63.1 mg, 348  $\mu$ mol) in THF (2 mL) was added NaH (13.9 mg, 348  $\mu$ mol, 60% dispersion in mineral oil) under inert atmosphere at 0 °C and the mixture was stirred for 30 min. A solution of compound **44** (100 mg, 174  $\mu$ mol) in THF (2 mL) was then added and the resulting mixture was heated to 70 °C and stirred for 16 h. The reaction was cooled to RT, quenched with water (20 mL) and extracted with EtOAc (3 x 10 mL). The combined organic layers were washed with brine (10 mL), dried over sodium sulfate, filtered, and concentrated under reduced pressure. The residue was purified by flash column chromatography (petroleum ether/ethyl acetate gradient 2-50%) to afford compound **45c** (50.0 mg, 43.5% yield) as a white solid. LCMS (ES<sup>+</sup>, Method 2)  $m/z$  659.4 [M+H]<sup>+</sup>.

**9-[(2*R*,3*R*,4*R*,5*S*)-3,4-bis[[*tert*-butyl(dimethyl)silyl]oxy]-5-(2-quinolylsulfanylmethyl)tetrahydrofuran-2-yl]purin-6-amine (45d)**

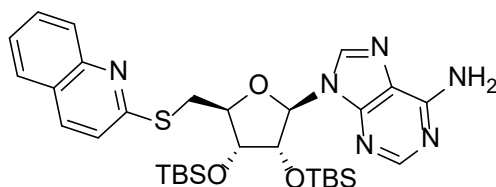

To a solution of quinoline-2-thiol (112 mg, 697  $\mu$ mol) in THF (2 mL) was added NaH (27.9 mg, 697  $\mu$ mol, 60% dispersion in mineral oil) under inert atmosphere at 0 °C and the mixture was stirred for 30 min. A solution compound **44** (200 mg, 348  $\mu$ mol) in THF (2 mL) was then added and the resulting mixture was heated to 70 °C and stirred for 16 h. The reaction was cooled to RT, quenched with water (30 mL) and extracted with EtOAc (3 x 15 mL). The combined organic layers were washed with brine (2 x 10 mL), dried over sodium sulfate, filtered, and concentrated under reduced pressure. The residue was purified by flash column chromatography (petroleum ether/ethyl acetate gradient 2-50%) to afford compound **45d** (180 mg, 80% yield) as colorless oil. <sup>1</sup>H NMR (400 MHz, DMSO-*d*<sub>6</sub>):  $\delta$  8.39 (s, 1H), 8.01 (s, 1H), 7.93 (t,  $J$  = 8.8 Hz, 2H), 7.74 (d,  $J$  = 8.4 Hz, 1H), 7.68 - 7.64 (m, 1H), 7.45 (t,  $J$  = 7.2 Hz, 1H), 7.24 (d,  $J$  = 8.4 Hz, 1H), 5.92 (d,  $J$  = 6.4 Hz, 1H), 5.73 (s, 2H), 5.26 (dd,  $J$  = 6.4, 4.0 Hz, 1H), 4.47 (td,  $J$

= 6.8, 1.6 Hz, 1H), 4.36 (dd,  $J$  = 4.4, 1.6 Hz, 1H), 4.10 - 4.05 (m, 1H), 3.85 (dd,  $J$  = 14.0, 6.4 Hz, 1H), 0.91 (s, 9H), 0.73 (s, 9H), 0.07 (s, 6H), -0.19 (s, 3H), -0.39 (s, 3H).

**9-[(2R,3R,4R,5S)-3,4-Bis[[tert-butyl(dimethyl)silyl]oxy]-5-[(6-methyl-2-quinolyl) sulfanyl methyl]tetrahydrofuran-2-yl]purin-6-amine (45e)**

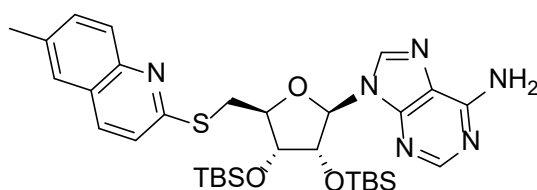

To a solution of 6-methylquinoline-2-thiol **73** (61.1 mg, 348  $\mu$ mol) in THF (2 mL) was added NaH (13.9 mg, 348  $\mu$ mol, 60% dispersion in mineral oil) under inert atmosphere at 0 °C and the mixture was stirred for 30 min. A solution of compound **44** (100 mg, 174  $\mu$ mol) in THF (2 mL) was then added and the resulting mixture was heated to 70 °C for 16 h. The reaction was cooled to RT, quenched with water (20 mL) and extracted with EtOAc (3 x 10 mL). The combined organic layers were washed with brine (10 mL), dried over sodium sulfate, filtered, and the filtrate was concentrated under reduced pressure. The residue was purified by flash column chromatography (petroleum ether/ethyl acetate gradient 2-50%) to afford compound **45e** (90.0 mg, 79% yield) as a white solid. LCMS (ES<sup>+</sup>, Method 2)  $m/z$  653.5 [M+H]<sup>+</sup>.

**9-[(2R,3R,4R,5S)-3,4-Bis[[tert-butyl(dimethyl)silyl]oxy]-5-[(7-methyl-2-quinolyl)sulfanyl methyl]tetrahydrofuran-2-yl]purin-6-amine (45f)**

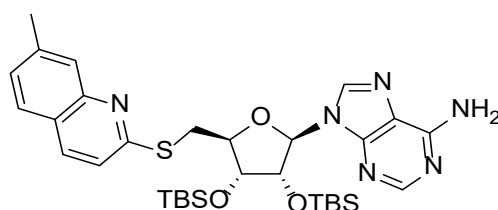

To a solution of 7-methylquinoline-2-thiol **77** (61.1 mg, 348  $\mu$ mol) in THF (2 mL) was added NaH (13.9 mg, 348  $\mu$ mol, 60% dispersion in mineral oil) under inert atmosphere at 0 °C and the mixture was stirred for 30 min. A solution of compound **44** (100 mg, 174  $\mu$ mol) in THF (1 mL) was added and the resulting mixture was heated to 70 °C for 16 h. The reaction was cooled to RT, quenched with water (20 mL) and extracted with EtOAc (3 x 10 mL). The

combined organic layers were washed with brine (10 mL), dried over sodium sulfate, filtered and the filtrate was concentrated under reduced pressure. The residue was purified by preparative TLC (SiO<sub>2</sub>, petroleum ether/ethyl acetate 50%) to afford compound **45f** (60.0 mg, 52% yield) as a white solid. LCMS (ES<sup>+</sup>, Method 2) *m/z* 635.5 [M+H]<sup>+</sup>.

**9-((2R,3R,4R,5S)-3,4-Bis((tert-butyldimethylsilyl)oxy)-5-((quinolin-7-ylthio)methyl)tetrahydrofuran-2-yl)-9H-purin-6-amine (45g)**

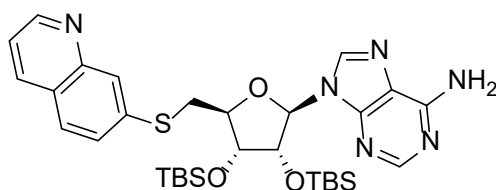

To a solution of imidazo-quinoline-7-thiol (110 mg, 680 μmol) in THF (2 mL) was added NaH (27.2 mg, 680 μmol, 60% dispersion in mineral oil) under inert atmosphere at 0 °C and the mixture was stirred for 30 min. A solution of compound **44** (130 mg, 227 μmol) in THF (1 mL) was then added and the resulting mixture was heated at 70 °C for 16 h. The reaction mixture was quenched with water (10 mL) and extracted with EtOAc (3 × 10 mL). The combined organic layers were washed with brine (10 mL), dried over sodium sulfate, filtered, and concentrated under reduced pressure. The residue was purified by flash column chromatography (petroleum ether/ethyl acetate gradient 0-100%) to afford compound **45g** (120 mg, 83% yield) as colorless oil. LCMS (ES<sup>+</sup>, Method 1) *m/z* 639.3 [M+H]<sup>+</sup>. <sup>1</sup>H NMR (400 MHz, CDCl<sub>3</sub>): δ 8.91 - 8.86 (m, 1H), 8.35 (s, 1H), 8.13 - 8.08 (m, 1H), 8.07 - 8.047 (m, 1H), 7.89 (s, 1H), 7.71 (d, *J* = 8.8 Hz, 1H), 7.51 - 7.46 (m, 1H), 7.38 - 7.34 (m, 1H), 5.86 (d, *J* = 6 Hz, 1H), 5.83 - 5.75 (m, 2H), 5.28 - 5.23 (m, 1H), 4.39 - 4.33 (m, 2H), 3.79 - 3.72 (m, 1H), 3.61 - 3.53 (m, 1H), 0.90 (s, 9H), 0.76 (s, 9H), 0.11 - 0.06 (m, 6H), -0.14 (s, 3H), -0.35 (s, 3H).

**9-[(2R,3R,4R,5S)-3,4-Bis[[tert-butyl(dimethyl)silyl]oxy]-5- (thiazol-2-ylsulfanylmethyl)tetrahydrofuran-2-yl]purin-6-amine (45h)**

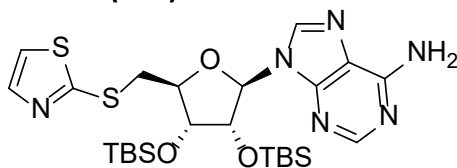



To a solution of thiazole-2-thiol (79.6 mg, 679  $\mu\text{mol}$ ) in THF (2 mL) was added NaH (27.2 mg, 679  $\mu\text{mol}$ , 60% dispersion in mineral oil) under inert atmosphere at 0 °C and the mixture was stirred for 30 min. A solution of compound **44** (130 mg, 226  $\mu\text{mol}$ ) in THF (2 mL) was then added, and the resulting mixture was heated to 70 °C for 16 h. The reaction was cooled at 0 °C, quenched with water (20 mL), and then extracted with EtOAc (3 x 10 mL). The combined organic layers were washed with brine (2 x 10 mL), dried over sodium sulfate, filtered, and concentrated under reduced pressure. The residue was purified by flash column chromatography (petroleum ether/ethyl acetate gradient 2-100%) to afford compound **45h** (70.0 mg, 52% yield) as a white solid. LCMS (ES<sup>+</sup>, Method 1)  $m/z$  595.2 [M+H]<sup>+</sup>. <sup>1</sup>H NMR (400MHz, CDCl<sub>3</sub>):  $\delta$  8.35 (s, 1H), 7.91 (s, 1H), 7.65 (d,  $J$  = 3.2 Hz, 1H), 7.22 (d,  $J$  = 3.2 Hz, 1H), 5.88 (d,  $J$  = 6.0 Hz, 1H), 5.59 (s, 2H), 5.31 - 5.27 (m, 1H), 4.39 (td,  $J$  = 6.4, 1.6 Hz, 1H), 4.35 - 4.33 (m, 1H), 3.93 (dd,  $J$  = 14.0, 6.8 Hz, 1H), 3.70 (dd,  $J$  = 14.4, 6.4 Hz, 1H), 0.93 (s, 9H), 0.77 (s, 9H), 0.10 (s, 3H), 0.09 (s, 3H), 0.01 (s, 3H), -0.09 (s, 3H).

**9-[(2*R*,3*R*,4*R*,5*S*)-3,4-Bis[[*tert*-butyl(dimethyl)silyl]oxy]-5- (imidazo[1,5-*a*]pyridin-8-ylsulfanylmethyl)tetrahydrofuran-2-yl]purin-6-amine (45i)**

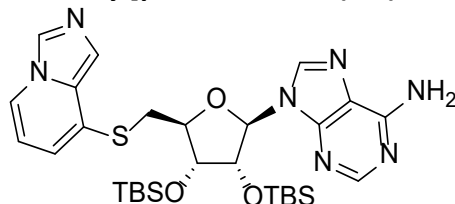

To a solution of compound **80** (47.1 mg, 313  $\mu\text{mol}$ ) in THF (2 mL) was added NaH (12.5 mg, 313  $\mu\text{mol}$ , 60% dispersion in mineral oil) under inert atmosphere at 0 °C and the mixture was stirred for 30 min. A solution of compound **44** (120 mg, 209  $\mu\text{mol}$ ) in THF (1 mL) was then added and the resulting mixture was heated at 70 °C for 16 h. The reaction mixture was cooled to RT, quenched with water (20 mL) and extracted with EtOAc (3 x 10 mL). The combined organic layers were washed with brine (10 mL), dried over sodium sulfate, filtered, and concentrated under reduced pressure. The residue was purified by flash column chromatography (petroleum ether/ethyl acetate gradient 0-50%) to afford compound **45i** (80.0 mg, 61% yield) as yellow oil. LCMS (ES<sup>+</sup>, Method 2)  $m/z$  628.5 [M+H]<sup>+</sup>. <sup>1</sup>H NMR (400MHz, CDCl<sub>3</sub>):  $\delta$  8.33 (s, 1H), 8.13 (s, 1H), 7.85 (s, 1H), 7.80 (d,  $J$  = 6.8 Hz, 1H), 7.55 (s, 1H), 6.71 (d,  $J$  = 6.8 Hz, 1H), 6.49 (t,  $J$  = 6.8 Hz, 1H), 5.83 (d,  $J$  = 6.0 Hz, 1H), 5.66 (s, 2H), 5.28 (dd,  $J$  = 6.0, 4.4

Hz, 1H), 4.35 - 4.34 (m, 1H), 4.32 - 4.28 (m, 1H), 3.72 - 3.70 (m, 1H), 3.48 - 3.43 (m, 1H), 0.90 (s, 9H), 0.76 (s, 9H), 0.08 (s, 3H), 0.04 (s, 3H), -0.02 (s, 3H), -0.36 (s, 3H).

**9-((2R,3R,4R,5S)-3,4-Bis((tert-butyldimethylsilyl)oxy)-5-(((1-methyl-1H-benzo[d]imidazol-2-yl)thio)methyl)tetrahydrofuran-2-yl)-9H-purin-6-amine (45j)**

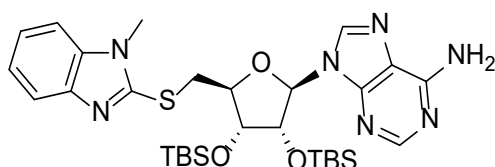

To a solution of 1-methyl-1H-benzo[d]imidazole-2-thiol (57.2 mg, 349  $\mu$ mol) in THF (4 mL) was added NaH (13.9 mg, 349  $\mu$ mol, 60% dispersion in mineral oil) under inert atmosphere at 0 °C and the reaction mixture was stirred for 30 min. A solution of compound **44** (100 mg, 174  $\mu$ mol) in THF (1 mL) was then added and the resulting mixture was heated at 70 °C for 16 h. The reaction mixture was cooled to RT, quenched with water (20 mL) and extracted with EtOAc (3  $\times$  10 mL). The combined organic layers were washed with brine (10 mL), dried over sodium sulphate, filtered and then concentrated under reduced pressure. The residue was purified by preparative TLC (SiO<sub>2</sub>, petroleum ether/ethyl acetate 50%) to afford compound **45j** (98.0 mg, 87% yield) as a white solid. LCMS (ES<sup>+</sup>, Method 2)  $m/z$  642.4 [M+H]<sup>+</sup>. <sup>1</sup>H NMR (400 MHz, CDCl<sub>3</sub>):  $\delta$  8.35 (s, 1H), 7.99 (s, 1H), 7.70 - 7.60 (m, 1H), 7.25 - 7.21 (m, 3H). 5.90 (d,  $J$  = 6.8 Hz, 1H), 5.79 (brs, 2H), 5.31 - 5.28 (m, 1H), 4.49 - 4.46 (m, 1H), 4.41 - 4.39 (m, 1H), 4.07 - 4.02 (m, Hz, 1H), 3.97 - 3.92 (m, 1H), 3.66 (s, 3H), 0.93 (s, 9H), 0.76 (s, 9H), 0.12 (s, 3H), 0.11(s, 3H), -0.10 (s, 3H), -0.37 (s, 3H).

**9-((2R,3R,4R,5S)-5-((Benzo[d]oxazol-2-ylthio)methyl)-3,4-bis((tert-butyldimethylsilyl)oxy)tetrahydrofuran-2-yl)-9H-purin-6-amine (45k)**

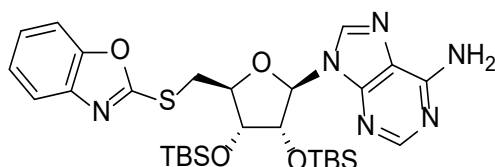

To a solution of 1,3-benzoxazole-2-thiol (105 mg, 697  $\mu$ mol) in THF (4 mL) was added NaH (27.9 mg, 697  $\mu$ mol, 60% dispersion in mineral oil) under inert atmosphere at 0 °C and the

mixture was stirred for 30 min. A solution of compound **44** (200 mg, 349  $\mu\text{mol}$ ) in THF (2 mL) was then added and the resulting mixture was stirred initially at RT for 30 min and then heated at 70 °C for 16 h. The reaction mixture was cooled to RT, quenched with water (20 mL) and extracted with EtOAc (3  $\times$  10 mL). The combined organic layers were washed with brine (10 mL), dried sodium sulphate, filtered, and concentrated under reduced pressure. The residue was purified by reverse column chromatography (0.1%  $\text{NH}_3\cdot\text{H}_2\text{O}$  in water/MeCN gradient 0-100%) to afford compound **45k** (160 mg, 73% yield) as a yellow oil. LCMS ( $\text{ES}^+$ , Method 2)  $m/z$  629.4  $[\text{M}+\text{H}]^+$ .

**9-((2R,3R,4R,5S)-5-(((1H-Benzo[d]imidazol-2-yl)thio)methyl)-3,4-bis((tertbutyldimethylsilyl)oxy)tetrahydrofuran-2-yl)-9H-purin-6-amine (45l)**

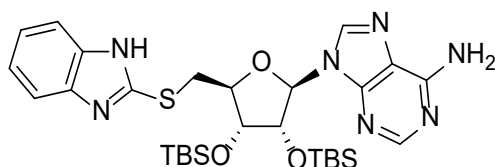

To a solution of 1H-benzimidazole-2-thiol (78.5 mg, 522.8  $\mu\text{mol}$ ) in THF (4 mL) was added NaH (20.9 mg, 522.8  $\mu\text{mol}$ , 60% dispersion in mineral oil) under inert atmosphere at 0 °C and the mixture was stirred for 30 min. A solution of compound **44** (200 mg, 349  $\mu\text{mol}$ ) in THF (2 mL) was added and the resulting mixture was stirred initially at RT for 30 mins and then heated at 70 °C and for 16 h. The reaction was cooled to RT, quenched with water (20 mL) and extracted with EtOAc (3  $\times$  10 mL). The combined organic layers were washed with brine (10 mL), dried sodium sulphate, filtered, and concentrated under reduced pressure. The residue was purified by reverse column chromatography (0.1%  $\text{NH}_3\cdot\text{H}_2\text{O}$  in water/MeCN gradient 0-100%) to afford compound **45l** (103 mg, 47% yield) as a yellow oil. LCMS ( $\text{ES}^+$ , Method 2)  $m/z$  628.4  $[\text{M}+\text{H}]^+$ .

**9-((2R,3R,4R,5S)-5-(((1H-Indazol-7-yl)thio)methyl)-3,4-bis((tert-butyl dimethylsilyl)oxy)tetrahydrofuran-2-yl)-9H-purin-6-amine (45m)**

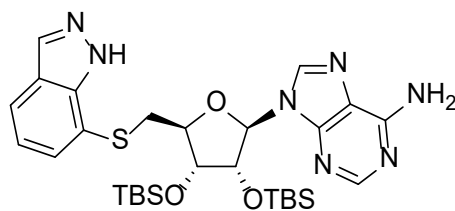

To a solution of compound **85** (52.7 mg, 349  $\mu\text{mol}$ ) in DMF (2 mL) was added NaH (13.9 mg, 349  $\mu\text{mol}$ , 60% dispersion in mineral oil) under  $\text{N}_2$  at 0 °C and the mixture was stirred for 30 min. A solution of compound **44** (100 mg, 174  $\mu\text{mol}$ ) in DMF (1 mL) was then added and the resulting mixture was heated at 70 °C for 16 h. The reaction mixture was cooled to RT, quenched with water (15 mL) and then extracted with EtOAc (3  $\times$  20 mL). The combined organic layers were washed with brine (60 mL), dried over sodium sulfate, filtered, and concentrated under reduced pressure. The residue was purified by preparative TLC ( $\text{SiO}_2$ , petroleum ether/ethyl acetate 50%) to afford compound **45m** (10.0 mg, 9% yield) as a colorless oil. LCMS ( $\text{ES}^+$ , Method 3)  $m/z$  628.1  $[\text{M}+\text{H}]^+$ .

**9-[(2R,3R,4R,5S)-3,4-bis[[tert-butyl(dimethyl)silyl]oxy]-5-(imidazo [1,5-a]pyridin-7-ylsulfanylmethyl)tetrahydrofuran-2-yl]purin-6-amine (45n)**

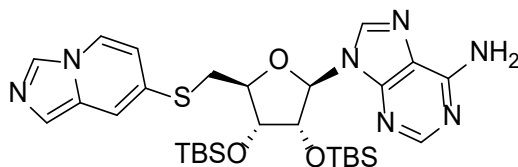

To a solution of imidazo[1,5-a]pyridine-7-thiol **91** (68.1 mg, 453  $\mu\text{mol}$ ) in THF (2 mL) was added NaH (18.1 mg, 453  $\mu\text{mol}$ , 60% dispersion in mineral oil) under inert atmosphere at 0 °C and the mixture was stirred for 30 min. A solution of compound **44** (130 mg, 226  $\mu\text{mol}$ ) in THF (1 mL) was added and the resulting mixture was heated to 70 °C for 16 h. The reaction was cooled to RT, quenched with water (20 mL) and extracted with EtOAc (3  $\times$  10 mL). The combined organic layers were washed with brine (10 mL), dried over sodium sulfate, filtered, and the filtrate was concentrated under reduced pressure. The residue was purified by flash column chromatography (petroleum ether/ethyl acetate gradient 0-50%) to afford compound **45n** (120 mg, 84% yield) as yellow oil. LCMS ( $\text{ES}^+$ , Method 2)  $m/z$  628.3  $[\text{M}+\text{H}]^+$ .  $^1\text{H}$  NMR (400 MHz,  $\text{CDCl}_3$ ):  $\delta$  8.30 (s, 1H), 8.04 (s, 1H), 7.87 (s, 1H), 7.80 (d,  $J$  = 7.6 Hz, 1H), 7.36 (s, 1H), 7.28 - 7.27 (m, 1H), 6.50 (dd,  $J$  = 7.6, 2.0 Hz, 1H), 6.06 (s, 2H), 5.83 (d,  $J$  = 5.6 Hz, 1H), 5.24 (dd,  $J$  =

5.6, 4.4 Hz, 1H), 4.38 - 4.36 (m, 1H), 4.30 - 4.26 (m, 1H), 3.54 (dd,  $J = 14.4, 6.8$  Hz, 1H), 3.70 (dd,  $J = 14.4, 6.0$  Hz, 1H), 0.93 (s, 9H), 0.77 (s, 9H), 0.12 (s, 3H), 0.11 (s, 3H), -0.11 (s, 3H), -0.33 (s, 3H).

**9-[(2*R*,3*R*,4*R*,5*R*)-5-(1,3-Benzothiazol-2-yloxymethyl)-3,4-bis[[*tert*-butyl(dimethyl)silyl]oxy]tetrahydrofuran-2-yl]purin-6-amine (45o)**

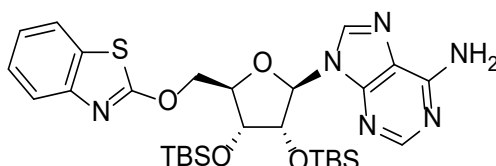

To a solution of 1,3-benzothiazol-2-ol (39.52 mg, 261.39  $\mu$ mol) in THF (1.5 mL) was added NaH (10.5 mg, 261  $\mu$ mol, 60% dispersion in mineral oil) under inert atmosphere at 0 °C and the mixture was stirred for 30 min. A solution of compound **44** (100 mg, 174  $\mu$ mol) in THF (1.5 mL) was then added and the resulting mixture was heated to 50 °C for 2 h. The reaction was cooled to RT, quenched with water (10 mL) and extracted with EtOAc (3 x 5 mL). The combined organic layers were washed with brine (5 mL), dried over sodium sulfate, filtered, and concentrated under reduced pressure. The residue was purified by flash column chromatography (petroleum ether/ethyl acetate gradient 2-100%) to afford compound **45o** (30.0 mg, 27% yield) as a white solid. LCMS (ES<sup>+</sup>, Method 2)  $m/z$  629.2 [M+H]<sup>+</sup>. <sup>1</sup>H NMR (400 MHz, CDCl<sub>3</sub>):  $\delta$  8.40 (s, 1H), 7.81 (s, 1H), 7.44 (d,  $J = 7.6$  Hz, 1H), 7.24 (d,  $J = 7.6$  Hz, 1H), 7.18 - 7.16 (m, 2H), 5.86 (d,  $J = 7.2$  Hz, 1H), 5.60 (s, 2H), 5.36 (dd,  $J = 6.4, 4.4$  Hz, 1H), 4.76 (dd,  $J = 14.4, 7.6$  Hz, 1H), 4.39 (d,  $J = 4.4$  Hz, 1H), 4.36 (d,  $J = 6.8$  Hz, 1H), 4.16 (d,  $J = 5.6$  Hz, 1H), 0.87 (s, 9H), 0.75 (s, 9H), 0.04 (s, 3H), -0.06 (d,  $J = 5.6$  Hz, 6H), -0.37 (s, 3H).

***N*-[(2*R*,3*R*,4*R*,5*R*)-5-(6-Aminopurin-9-yl)-3,4-bis[[*tert*-butyl(dimethyl)silyl]oxy]tetrahydrofuran-2-yl]methyl-1,3-benzothiazol-2-amine (45p)**

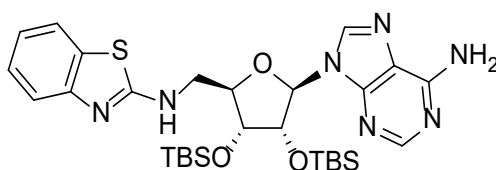

To a solution of 1,3-benzothiazol-2-amine (78.5 mg, 522  $\mu\text{mol}$ ) in THF (1 mL) was added NaH (20.9 mg, 522  $\mu\text{mol}$ , 60% dispersion in mineral oil) under inert atmosphere at 0 °C and the mixture was stirred for 30 min. A solution of compound **44** (100 mg, 174  $\mu\text{mol}$ ) in THF (1 mL) was then added and the resulting mixture was heated to 70 °C for 16 h. The reaction was cooled to room RT, quenched with water (20 mL) and extracted with EtOAc (3 x 10 mL). The combined organic layers were washed with brine (10 mL), dried over sodium sulfate, filtered, and the filtrate was concentrated under reduced pressure. The residue was purified by flash column chromatography (petroleum ether/ethyl acetate gradient 2-50%) to afford compound **45p** (35.0 mg, 32% yield) as colorless oil. LCMS (ES<sup>+</sup>, Method 3)  $m/z$  628.2 [M+H]<sup>+</sup>.

**(2R,3R,4S,5S)-2-(6-aminopurin-9-yl)-5-(1,3-benzothiazol-2-ylsulfanylmethyl) tetrahydrofuran-3,4-diol (1)**

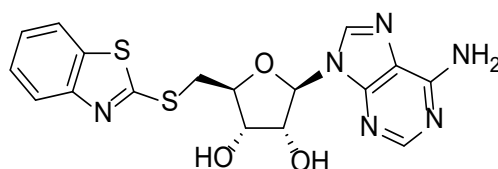

To a solution of **45a** (50.0 mg, 77.5  $\mu\text{mol}$ ) in MeOH (2 mL) was added potassium fluoride (13.5 mg, 232  $\mu\text{mol}$ ). The reaction mixture was stirred at RT for 16 h and then concentrated under reduced pressure. The residue was purified by prep-HPLC (Method 1) to afford compound **1** (12.9 mg, 40% yield) as a white solid. HRMS (Method 1)  $m/z$  [M+H]<sup>+</sup> calcd for C<sub>17</sub>H<sub>16</sub>N<sub>6</sub>O<sub>3</sub>S<sub>2</sub> 417.0804; found 417.0803. <sup>1</sup>H NMR (400 MHz, DMSO-*d*<sub>6</sub>):  $\delta$  8.39 (s, 1H), 8.15 (s, 1H), 8.01 (d,  $J$  = 8.0 Hz, 1H), 7.86 (d,  $J$  = 8.0 Hz, 1H), 7.47 (t,  $J$  = 7.6 Hz, 1H), 7.39 - 7.33 (m, 3H), 5.88 (d,  $J$  = 5.6 Hz, 1H), 5.92 (d,  $J$  = 6.0 Hz, 1H), 5.58 (s, 1H), 5.49 (s, 1H), 7.84 (s, 1H), 4.28 - 4.24 (m, 2H), 3.89 - 3.84 (m, 1H), 3.77 - 3.74 (m, 1H). <sup>13</sup>C NMR (126 MHz, DMSO-*d*<sub>6</sub>)  $\delta$  166.21, 156.12, 152.65, 152.57, 149.41, 140.05, 134.63, 126.40, 124.52, 121.82, 121.12, 119.28, 87.68, 82.42, 72.74, 72.58, 35.37. SFC (Method 1) de% = 100%. [ $\alpha$ ]<sub>D</sub><sup>20</sup> = +25.0 (c=0.01, MeOH).

**(2R,3R,4S,5S)-2-(6-aminopurin-9-yl)-5-[(6-methyl-1,3-benzothiazol-2-yl)sulfanylmethyl] tetrahydrofuran-3,4-diol (2)**

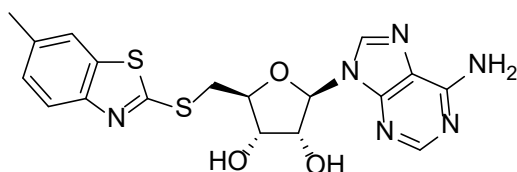

To a solution of **45b** (100 mg, 0.15 mmol) in DMF (2 mL) was added potassium fluoride (88.1 mg, 1.52 mmol). The reaction mixture was stirred at 60 °C for 16 h, cooled to RT and then concentrated under reduced pressure. The residue was purified by prep-HPLC (Method 2) to afford compound **2** (23.4 mg, 35% yield) as an off-white solid. HRMS  $m/z$   $[M+H]^+$  calcd for  $C_{18}H_{18}N_6O_3S_2$  431.5090; found 431.0964.  $^1H$  NMR (400 MHz, DMSO- $d_6$ ):  $\delta$  8.37 (s, 1H), 8.15 (s, 1H), 7.78 (s, 1H), 7.73 (d,  $J$  = 8.4 Hz, 1H), 7.30 - 7.27 (m, 3H), 5.92 (d,  $J$  = 5.6 Hz, 1H), 5.51 (brs, 2H), 4.86 (t,  $J$  = 5.2 Hz, 1H), 4.29 - 4.27 (m, 2H), 4.23 - 4.22 (m, 1H), 3.84 (dd,  $J$  = 13.6, 5.6 Hz, 1H), 3.72 (dd,  $J$  = 13.6, 7.6 Hz, 1H), 2.41 (s, 3H).  $^{13}C$  NMR (126 MHz, DMSO- $d_6$ )  $\delta$  164.75, 156.11, 152.65, 150.73, 149.41, 140.04, 134.77, 134.19, 127.69, 121.41, 120.70, 119.26, 87.65, 82.45, 72.73, 72.58, 35.38, 20.93.

**2R,3R,4S,5S)-2-(6-aminopurin-9-yl)-5-[(5-methyl-1,3-benzothiazol-2-yl)sulfanylmethyl] tetrahydrofuran-3,4-diol (3)**

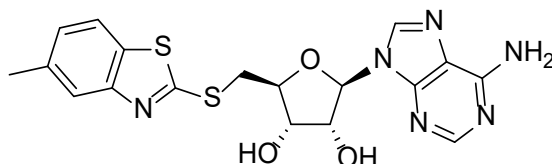

To a solution of compound **45c** (50.0 mg, 75.8  $\mu$ mol) in DMF (2 mL) was added potassium fluoride (44.1 mg, 758  $\mu$ mol). The reaction mixture was stirred at 60 °C for 16 h, cooled to RT and then concentrated under reduced pressure. The residue was purified by prep-HPLC (Method 1) to afford compound **3** (11.2 mg, 34% yield) as a white solid. HRMS (Method 3)  $m/z$   $[M+H]^+$  calcd for  $C_{17}H_{17}N_7O_3S$  431.0960; found 431.0975.  $^1H$  NMR (400 MHz, DMSO- $d_6$ ):  $\delta$  8.45 (s, 1H), 8.22 (s, 1H), 7.86 (d,  $J$  = 8.4 Hz, 1H), 7.67 (s, 2H), 7.66 - 7.56 (m, 1H), 7.19 (d,  $J$  = 7.6 Hz, 1H), 5.93 (d,  $J$  = 5.6 Hz, 1H), 5.65 - 5.38 (s, 1H), 4.84 (t,  $J$  = 5.2 Hz, 1H), 4.21 - 4.32 (m, 2H), 3.85 (dd,  $J$  = 13.6, 5.6 Hz, 1H), 3.73 (dd,  $J$  = 13.6, 5.6 Hz, 1H), 2.42 (s, 3H).

**(2R,3R,4S,5S)-2-(6-aminopurin-9-yl)-5-(2-quinolylsulfanylmethyl) tetrahydrofuran-3,4-diol**

(7)

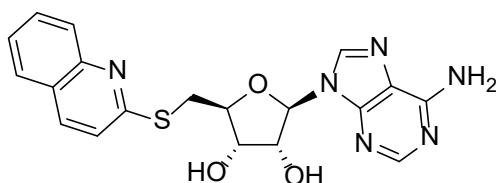

To a solution of compound **45d** (130 mg, 0.20 mmol) in MeOH (5 mL) was added potassium fluoride (118 mg, 2.03 mmol). The reaction mixture was stirred at 60 °C for 16 h, cooled to RT and then concentrated under reduced pressure. The residue was purified by prep-HPLC (Method 1) to compound **7** (13.12 mg, 16% yield) as a white solid. HRMS (Method 1)  $m/z$   $[M+H]^+$  calcd for  $C_{19}H_{18}N_6O_3S$  411.1239; found: 411.1249.  $^1H$  NMR (400 MHz, DMSO- $d_6$ ):  $\delta$  8.40 (s, 1H), 8.18 - 8.15 (m, 2H), 7.89 (t,  $J$  = 8.4 Hz, 1H), 7.71 (td,  $J$  = 8.0, 1.2 Hz, 1H), 7.51 (t,  $J$  = 7.6 Hz, 1H), 7.39 (d,  $J$  = 8.8 Hz, 1H), 7.30 (s, 2H), 5.92 (d,  $J$  = 6.4 Hz, 1H), 4.93 (t,  $J$  = 5.6 Hz, 1H), 4.25 - 4.23 (m, 1H), 4.19 - 4.18 (m, 1H), 3.84 (dd,  $J$  = 14.0, 6.8 Hz, 1H), 3.64 (dd,  $J$  = 14.0, 6.8 Hz, 1H).  $^{13}C$  NMR (126 MHz, DMSO- $d_6$ )  $\delta$  157.96, 156.11, 152.65, 149.54, 147.49, 139.98, 136.13, 130.05, 128.00, 127.42, 125.78, 125.54, 120.85, 119.26, 87.39, 83.23, 72.76, 72.54, 31.32.

(2*R*,3*R*,4*S*,5*S*)-2-(6-Aminopurin-9-yl)-5-[(6-methyl-2-quinolyl)  
tetrahydrofuran-3,4-diol (**8**)

sulfanylmethyl]

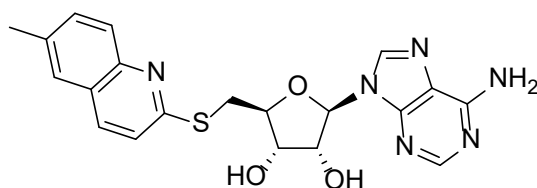

To a solution of compound **45e** (90.0 mg, 0.14 mmol) in DMF (2 mL) was added potassium fluoride (80.1 mg, 1.38 mmol). The reaction mixture was stirred at 60 °C for 16 h, cooled to RT and then concentrated under reduced pressure. The residue was purified by prep-HPLC (Method 1) to afford compound **8** (25.1 mg, 43% yield) as a white solid. HRMS (Method 4)  $m/z$   $[M+H]^+$  calcd for  $C_{20}H_{20}N_6O_3S$  425.1396; found 425.1416.  $^1H$  NMR (400 MHz, DMSO- $d_6$ ):  $\delta$  8.40 (s, 1H), 8.16 (s, 1H), 8.07 (d,  $J$  = 8.8 Hz, 1H), 7.78 (d,  $J$  = 8.8 Hz, 1H), 7.67 (s, 1H), 7.55 (dd,  $J$  = 8.8, 1.6 Hz, 1H), 7.34 (d,  $J$  = 8.8 Hz, 1H), 7.30 (s, 1H), 5.91 (d,  $J$  = 6.4 Hz, 1H), 5.55 (s, 1H), 5.36



(s, 1H), 4.93 (s, 1H), 4.23 (s, 1H), 4.20 - 4.15 (m, 1H), 3.82 (dd,  $J = 14.0, 6.8$  Hz, 1H), 3.62 (dd,  $J = 14.0, 6.8$  Hz, 1H), 2.46 (s, 3H).  $^{13}\text{C}$  NMR (126 MHz,  $\text{DMSO-}d_6$ )  $\delta$  156.79, 156.11, 152.66, 149.55, 146.10, 139.98, 135.58, 134.90, 132.01, 127.22, 126.82, 125.75, 120.80, 119.27, 87.37, 83.27, 72.76, 72.54, 31.32, 20.96.

**(2*R*,3*R*,4*S*,5*S*)-2-(6-Aminopurin-9-yl)-5-[(7-methyl-2-quinolyl)sulfanylmethyl] tetrahydrofuran-3,4-diol (9)**

**sulfanylmethyl]**

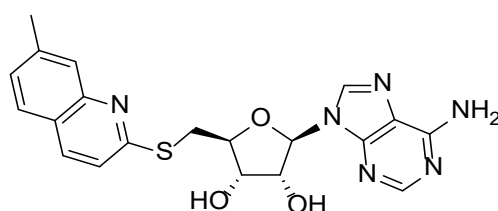

To a solution of compound **45f** (60.0 mg, 91.9  $\mu\text{mol}$ ) in DMF (2 mL) was added potassium fluoride (53.3 mg, 918  $\mu\text{mol}$ ). The reaction mixture was stirred at 60 °C for 16 h, cooled to RT and then concentrated under reduced pressure. The residue was purified by prep-HPLC (Method 3) to afford compound **9** (14.6 mg, 37% yield) as a white solid. HRMS (Method 1)  $m/z$   $[\text{M}+\text{H}]^+$  calcd for  $\text{C}_{20}\text{H}_{20}\text{N}_6\text{O}_3\text{S}$  425.1396; found 425.1391.  $^1\text{H}$  NMR (400 MHz,  $\text{DMSO-}d_6$ ):  $\delta$  8.32 (s, 1H), 8.08 (s, 1H), 7.90 (d,  $J = 8.8$  Hz, 1H), 7.64 (d,  $J = 8.4$  Hz, 1H), 7.62 (s, 1H), 7.30 (dd,  $J = 8.0, 0.8$  Hz, 1H), 7.22 (d,  $J = 8.4$  Hz, 1H), 6.04 (d,  $J = 3.6$  Hz, 1H), 5.74 (s, 2H), 4.69 - 4.65 (m, 2H), 4.44 (t,  $J = 4.8$  Hz, 1H), 3.97 (dd,  $J = 14.8, 4.4$  Hz, 1H), 3.62 (dd,  $J = 14.8, 5.2$  Hz, 1H), 2.52 (s, 3H).

**(2*R*,3*R*,4*S*,5*S*)-2-(6-Aminopurin-9-yl)-5-(7-quinolyl)sulfanylmethyl tetrahydrofuran-3,4-diol (10)**

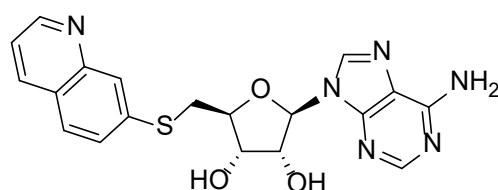

To a solution of compound **45g** (100 mg, 0.16 mmol) in MeOH (3 mL) was added potassium

fluoride (90.9 mg, 1.57 mmol). The reaction mixture was stirred at 50 °C for 16 h, cooled to RT and then concentrated under reduced pressure. The residue was purified by reverse column chromatography (0.05% NH<sub>3</sub>·H<sub>2</sub>O in water/MeCN gradient 0-25%) to afford compound **10** (29.2 mg, 45% yield) as a white solid. HRMS (Method 1) *m/z* [M+H]<sup>+</sup> calcd for C<sub>19</sub>H<sub>18</sub>N<sub>6</sub>O<sub>3</sub>S 411.1239; found 411.1243. <sup>1</sup>H NMR (400 MHz, DMSO-*d*<sub>6</sub>): δ 8.85 (dd, *J* = 4.0, 1.6 Hz, 1H), 8.15 (s, 1H), 7.89 - 7.87 (m, 2H), 7.52 (dd, *J* = 8.4, 1.6 Hz, 1H), 7.45 (dd, *J* = 8.4, 4.0 Hz, 1H), 7.27 (s, 1H), 5.90 (d, *J* = 6.0 Hz, 1H), 4.81 (t, *J* = 5.2 Hz, 1H), 4.24 (t, *J* = 4.4 Hz, 1H), 4.12 - 4.08 (m, 1H), 3.62 (dd, *J* = 13.6, 5.6 Hz, 1H), 3.49 (dd, *J* = 13.6, 7.2 Hz, 1H). <sup>13</sup>C NMR (126 MHz, DMSO-*d*<sub>6</sub>) δ 156.56, 153.11, 151.55, 149.94, 148.53, 140.38, 138.96, 136.29, 128.91, 126.92, 126.28, 125.27, 121.39, 119.67, 88.04, 83.09, 73.40, 73.32, 34.84.

**(2*R*,3*R*,4*S*,5*S*)-2-(6-Aminopurin-9-yl)-5-(thiazol-2-ylsulfanylmethyl) tetrahydrofuran-3,4-diol (11)**

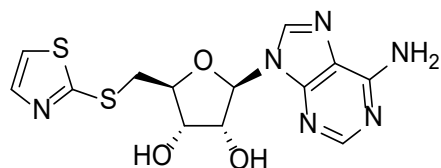

To a solution of **45h** (70.0 mg, 0.12 mmol) in MeOH (5 mL) was added potassium fluoride (68.4 mg, 1.18 mmol). The reaction mixture was stirred at 60 °C for 16 h, cooled to RT and then concentrated under reduced pressure. The residue was purified by reverse column chromatography (0.05% NH<sub>3</sub>·H<sub>2</sub>O in water/MeCN gradient 0-45%) to afford compound **11** (18.5 mg, 43% yield) as a white solid. HRMS (Method 1) *m/z* [M+H]<sup>+</sup> calcd for C<sub>13</sub>H<sub>14</sub>N<sub>6</sub>O<sub>3</sub>S<sub>2</sub> 367.0647; found 367.0656. <sup>1</sup>H NMR (400 MHz, DMSO-*d*<sub>6</sub>): δ 8.34 (s, 1H), 8.14 (s, 1H), 7.71 (d, *J* = 3.2 Hz, 1H), 7.64 (d, *J* = 3.6 Hz, 1H), 7.30 (s, 2H), 8.06 (s, 1H), 5.89 (d, *J* = 6.0 Hz, 1H), 4.80 (t, *J* = 5.6 Hz, 1H), 4.21 (t, *J* = 3.6 Hz, 1H), 4.15 - 4.13 (m, 1H), 3.70 (dd, *J* = 14.0, 5.6 Hz, 1H), 3.56 (dd, *J* = 14.0, 7.6 Hz, 1H). <sup>13</sup>C NMR (126 MHz, DMSO-*d*<sub>6</sub>) δ 163.37, 156.10, 152.63, 149.42, 142.73, 139.98, 120.40, 119.23, 87.61, 82.55, 72.76, 72.73, 36.28.

**(2*R*,3*R*,4*S*,5*S*)-2-(6-Aminopurin-9-yl)-5-(imidazo[1,5-*a*]pyridin-8-ylsulfanylmethyl) tetrahydrofuran-3,4-diol (12)**

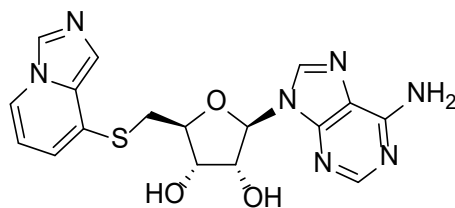

To a solution of compound **45i** (70.0 mg, 0.11 mmol) in MeOH (3 mL) was added potassium fluoride (64.7 mg, 1.11 mmol). The reaction mixture was heated to 60 °C for 16 h, cooled to RT and then concentrated under reduced pressure. The residue was purified by reverse column chromatography (0.1% NH<sub>3</sub>·H<sub>2</sub>O in water/MeCN gradient 0-50%) to afford compound **12** (31.3 mg, 69% yield) as an off-white solid. HRMS (Method 1) *m/z* [M+H]<sup>+</sup> calcd for C<sub>17</sub>H<sub>17</sub>N<sub>7</sub>O<sub>3</sub>S 400.1192; found 400.1201. <sup>1</sup>H NMR (400 MHz, DMSO-*d*<sub>6</sub>): δ 8.40 (s, 1H), 8.35 (s, 1H), 8.21 (d, *J* = 7.2 Hz, 1H), 8.14 (s, 1H), 7.35 (s, 1H), 7.29 (s, 2H), 6.77 (d, *J* = 6.8 Hz, 1H), 6.60 (t, *J* = 6.8 Hz, 1H), 6.03 (brs, 1H), 5.90 (d, *J* = 5.6 Hz, 1H), 4.80 (t, *J* = 5.6 Hz, 1H), 4.22 (t, *J* = 4.8 Hz, 1H), 4.07 - 4.06 (m, 1H), 3.53 (dd, *J* = 13.6, 5.2 Hz, 1H), 3.42 (dd, *J* = 13.6, 7.6 Hz, 1H). <sup>13</sup>C NMR (126 MHz, DMSO-*d*<sub>6</sub>) δ 156.10, 152.65, 149.44, 139.94, 129.50, 128.61, 125.95, 120.93, 119.21, 118.56, 116.71, 112.13, 87.59, 82.61, 72.85, 72.71, 33.60.

**(2R,3R,4S,5S)-2-(6-Amino-9H-purin-9-yl)-5-(((1-methyl-1H-benzo[d]imidazol-2-yl)thio)methyl)tetrahydrofuran-3,4-diol (**13**)**

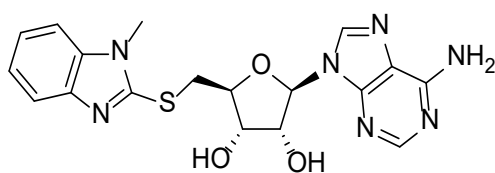

To a solution of compound **45j** (98.0 mg, 0.15 mmol) in MeOH (4 mL) was added potassium fluoride (3.28 mmol). The reaction mixture was stirred at 60 °C for 16 h, cooled to RT and then concentrated under reduced pressure. The residue was purified by reverse column chromatography (0.1% NH<sub>3</sub>·H<sub>2</sub>O in water/MeCN gradient 0-100%) to afford compound **13** (4.67 mg, 7% yield) as a white solid. HRMS (Method 1) *m/z* [M+H]<sup>+</sup> calcd for C<sub>17</sub>H<sub>17</sub>N<sub>7</sub>O<sub>3</sub>S 414.1378; found 414.1356. <sup>1</sup>H NMR (400 MHz, DMSO-*d*<sub>6</sub>): δ 8.40 (s, 1H), 8.16 (s, 1H), 7.55 - 7.53 (m, 1H), 7.50 - 7.44 (m, 1H), 7.30 (brs, 2H), 7.22 - 7.11 (m, 2H), 5.91 (d, *J* = 6.0 Hz, 1H),

5.54 (d,  $J = 6.0$  M Hz, 1H), 5.44 (d,  $J = 4.4$  M Hz, 1H), 4.88 - 4.86 (m, 1H), 4.30 - 4.24 (m, 1H), 4.23 - 4.18 (m, 1H), 3.87 - 3.79 (m, 1H), 3.74 - 3.68 (m, 1H), 3.66 (s, 3H).

**(2R,3R,4S,5S)-2-(6-Amino-9H-purin-9-yl)-5-((benzo[d]oxazol-2-ylthio)methyl) tetrahydrofuran-3,4-diol (**14**)**

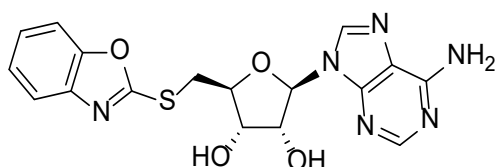

To a solution of compound **45k** (160 mg, 0.25 mmol) in MeOH (4 mL) was added potassium fluoride (119  $\mu$ L, 5.09 mmol). The reaction mixture was stirred at 60 °C for 16 h, cooled to RT and then concentrated under reduced pressure. The residue was purified by reverse column chromatography (0.1%  $\text{NH}_3 \cdot \text{H}_2\text{O}$  in water/MeCN gradient 0-100%) to afford compound **14** (22.0 mg, 21% yield) as a white solid. HRMS (Method 1)  $m/z$   $[\text{M}+\text{H}]^+$  calcd for  $\text{C}_{17}\text{H}_{16}\text{N}_6\text{O}_4\text{S}$  401.1078; found 400.1043.  $^1\text{H}$  NMR (400 MHz,  $\text{DMSO}-d_6$ ):  $\delta$  8.38 (s, 1H), 8.14 (s, 1H), 7.65 - 7.61 (m, 2H), 7.36 - 7.29 (m, 4H), 5.9 (d,  $J = 5.6$  Hz, 1H), 5.73 - 5.42 (m, 1H), 4.85 (t,  $J = 5.2$  Hz, 1H), 4.24 - 4.24 (m, 2H), 3.86 - 3.78 (m, 1H), 3.75 - 3.66 (m, 1H).  $^{13}\text{C}$  NMR (126 MHz,  $\text{DMSO}-d_6$ )  $\delta$  164.02, 156.12, 152.64, 151.30, 149.38, 141.19, 140.06, 124.64, 124.28, 119.28, 118.22, 110.19, 87.68, 82.29, 72.67, 72.61, 34.47.

**(2S,3S,4R,5R)-2-(((1H-Benzo[d]imidazol-2-yl)thio)methyl)-5-(6-amino-9H-purin-9-yl) tetrahydrofuran-3,4-diol (**15**)**

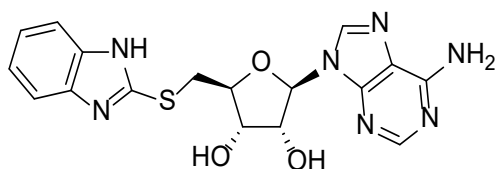

To a solution of compound **45l** (103 mg, 0.16 mmol) in MeOH (4 mL) was added potassium fluoride (77  $\mu$ L, 3.28 mmol). The reaction mixture was stirred at 60 °C for 16 h, cooled to RT and then concentrated under reduced pressure. The residue was purified by reverse column chromatography (0.1%  $\text{NH}_3 \cdot \text{H}_2\text{O}$  in water/MeCN gradient 0-100%) to afford compound **15** (40.5 mg, 62% yield) as a white solid. HRMS (Method 1)  $m/z$   $[\text{M}+\text{H}]^+$  calcd for  $\text{C}_{17}\text{H}_{17}\text{N}_7\text{O}_3\text{S}$

400.1178; found 400.1201.  $^1\text{H}$  NMR (400 MHz,  $\text{DMSO-}d_6$ ):  $\delta$  8.39 (s, 1H), 8.15 (s, 1H), 7.44 - 7.42 (m, 2H), 7.30 (s, 2H), 7.15 - 7.05 (m, 2H), 5.97 (d,  $J$  = 6 Hz, 1H), 5.53 - 5.52 (m, 1H), 4.84 - 4.83 (m, 1H), 4.25 - 4.19 (m, 2H), 3.80 - 3.73 (m, 1H), 3.67 - 3.62 (m, 1H).  $^{13}\text{C}$  NMR (126 MHz,  $\text{DMSO-}d_6$ )  $\delta$  156.10, 152.67, 149.93, 149.48, 139.92, 121.28, 119.23, 87.43, 82.90, 72.71, 72.64, 33.84.

**(2S,3S,4R,5R)-2-(((1H-Indazol-7-yl)thio)methyl)-5-(6-amino-9H-purin-9-yl)tetrahydrofuran-3,4-diol (16)**

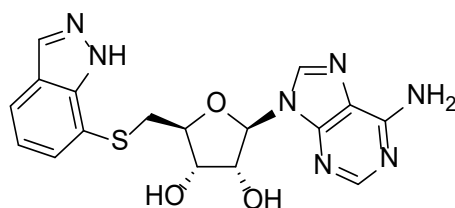

To a solution of compound **45m** (10.0 mg, 15.9  $\mu\text{mol}$ ) in MeOH (2 mL) was added potassium fluoride (7.5  $\mu\text{L}$ , 319  $\mu\text{mol}$ ). The reaction mixture was stirred at 60  $^\circ\text{C}$  for 16 h, cooled to RT and then concentrated under reduced pressure. The residue was purified by reverse column chromatography (0.1%  $\text{NH}_3\cdot\text{H}_2\text{O}$  in water/MeCN gradient 0-100%) to afford compound **16** (3.86 mg, 61%). HRMS (Method 1)  $m/z$   $[\text{M}+\text{H}]^+$  calcd for  $\text{C}_{17}\text{H}_{17}\text{N}_7\text{O}_3\text{S}$  400.4378; found 400.1187.  $^1\text{H}$  NMR (400 MHz,  $\text{DMSO-}d_6$ ):  $\delta$  8.36 (s, 1H), 8.17 - 8.13 (m, 2H), 7.69 - 7.66 (m, 1H), 7.41 - 7.38 (m, 1H), 7.31 - 7.28 (s, 2H), 7.07 (t,  $J$  = 7.6 Hz, 1H), 5.89 (d,  $J$  = 6 Hz, 1H), 4.82 (t,  $J$  = 5.6 Hz, 1H), 4.23 - 4.81 (m, 1H), 4.02 - 3.98 (m, 1H), 3.58 - 3.55 (m, 2H).

**(2R,3R,4S,5S)-2-(6-Aminopurin-9-yl)-5-(imidazo[1,5-a]pyridine-7-ylsulfanylmethyl) tetrahydrofuran-3,4-diol (17)**

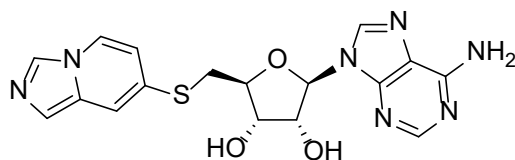

To a solution compound **45n** (100 mg, 0.16 mmol) in MeOH (2 mL) was added potassium fluoride (92.5 mg, 1.59 mmol). The reaction mixture was stirred at 60  $^\circ\text{C}$  for 16 h, cooled to RT and concentrated under reduced pressure. The residue was purified by reverse column

chromatography (100 Å; 0.05% NH<sub>3</sub>·H<sub>2</sub>O in water/MeCN gradient 0-25%) to afford compound **17** (22.2 mg, 33% yield) as a green solid. HRMS (Method 1)  $m/z$  [M+H]<sup>+</sup> calcd for C<sub>17</sub>H<sub>17</sub>N<sub>7</sub>O<sub>3</sub>S 400.1192; found 400.1176. <sup>1</sup>H NMR (400 MHz, DMSO-*d*<sub>6</sub>): δ 8.36 (s, 1H), 8.27 (s, 1H), 8.24 (d, *J* = 7.6 Hz, 1H), 8.15 (s, 1H), 7.43 (s, 1H), 7.29 (s, 2H), 7.16 (s, 1H), 6.57 (dd, *J* = 7.2, 1.6 Hz, 1H), 5.90 (d, *J* = 6.0 Hz, 1H), 5.82 (s, 1H), 4.80 (t, *J* = 5.6 Hz, 1H), 4.22 (t, *J* = 4.0 Hz, 1H), 4.06 - 4.02 (m, 1H), 3.43 (dd, *J* = 13.6, 5.6 Hz, 1H), 3.36 - 3.34 (m, 1H). <sup>13</sup>C NMR (126 MHz, DMSO-*d*<sub>6</sub>) δ 156.10, 152.65, 149.45, 139.94, 129.72, 128.36, 127.00, 123.18, 119.20, 118.04, 114.31, 113.30, 87.53, 82.71, 72.82, 72.69, 34.62.

**(2*R*,3*R*,4*S*,5*R*)-2-(6-aminopurin-9-yl)-5-(1,3-benzothiazol-2-yloxymethyl)tetrahydrofuran-3,4-diol (23)**

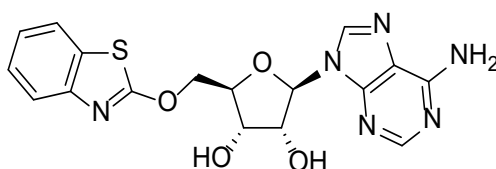

To a solution of compound **45o** (30.0 mg, 47.7 μmol) in THF (3 mL) was added *N,N*-diethylethanamine trihydrofluoride (23.1 mg, 143 μmol). The reaction mixture was stirred at RT for 16 h and then concentrated under reduced pressure. The residue was purified by prep-HPLC (Method 5) to afford compound **23** (8.15 mg, 42% yield) as a white solid. HRMS (Method 1)  $m/z$  [M+H]<sup>+</sup> calcd for C<sub>17</sub>H<sub>16</sub>N<sub>6</sub>O<sub>4</sub>S 401.1032; found 401.1031. <sup>1</sup>H NMR (400 MHz, DMSO-*d*<sub>6</sub>): 8.32 (s, 1H), 8.13 (s, 1H), 7.61 (d, *J* = 7.6 Hz, 1H), 7.32 (s, 1H), 7.29 (d, *J* = 5.6 Hz, 1H), 7.17 (t, *J* = 7.6 Hz, 1H), 7.13 (t, *J* = 7.6 Hz, 1H), 6.87 (d, *J* = 5.2 Hz, 1H), 5.57 (d, *J* = 6.0 Hz, 1H), 5.42 (d, *J* = 5.2 Hz, 1H), 4.77 (q, *J* = 5.2 Hz, 1H), 4.35 (t, *J* = 9.2 Hz, 1H), 4.30 - 4.28 (m, 1H), 4.25 - 4.23 (m, 2H). SFC (Method 1) de% = 100%.

**2*R*,3*R*,4*S*,5*R*)-2-(6-Aminopurin-9-yl)-5-[(1,3-benzothiazol-2-ylamino)methyl]tetrahydrofuran-3,4-diol (24)**

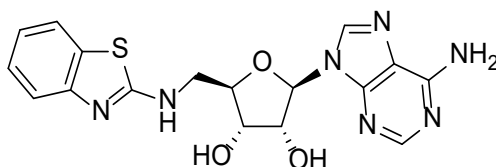

To a solution of **45p** (35.0 mg, 55.7  $\mu\text{mol}$ ) in THF (4 mL) was added *N,N*-diethylethanamine trihydrofluoride (17.9 mg, 111  $\mu\text{mol}$ ). The reaction mixture was stirred at RT for 16 h and then concentrated under reduced pressure. The residue was purified by prep-HPLC (Method 6), followed by (Method 7) to afford compound **24** (4.01 mg, 17% yield) as a white solid. HRMS (Method 1)  $m/z$   $[\text{M}+\text{H}]^+$  calcd for  $\text{C}_{17}\text{H}_{17}\text{N}_7\text{O}_3\text{S}$  400.1192; found 400.1197.  $^1\text{H}$  NMR (400 MHz,  $\text{DMSO}-d_6$ ):  $\delta$  9.45 (s, 1H), 8.33 (s, 1H), 8.14 (s, 1H), 7.45 (d,  $J = 7.2$  Hz, 1H), 7.32 (d,  $J = 8.4$  Hz, 1H), 7.29 (s, 2H), 7.09 (dd,  $J = 8.0, 0.8$  Hz, 1H), 6.97 (t,  $J = 7.2$  Hz, 1H), 5.88 (d,  $J = 5.6$  Hz, 1H), 5.49 (d,  $J = 6.0$  Hz, 1H), 5.36 (s, 1H), 4.81 (q,  $J = 5.2$  Hz, 1H), 4.17 (t,  $J = 3.6$  Hz, 1H), 3.94 - 3.93 (m, 1H), 3.23 - 3.19 (m, 2H). SFC (Method 1) de% = 100%.

## Scheme S2

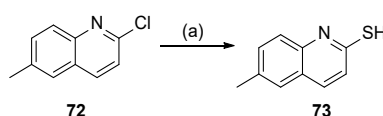

(a) thiourea, EtOH, 80  $^{\circ}\text{C}$ , 16 h, 63%

### 6-Methylquinoline-2-thiol (**73**)

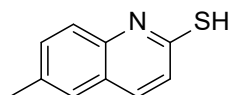

To a solution of 2-chloro-6-methyl-quinoline **72** (200 mg, 1.13 mmol) in EtOH (4 mL) was added thiourea (257 mg, 3.38 mmol) and the reaction mixture was stirred at 80  $^{\circ}\text{C}$  for 16 h. The mixture was cooled to RT, filtered, and the resulting filter-cake was dried under reduced pressure to afford compound **73** (125 mg, 63% yield) as a yellow solid. The isolated material was used in the following step without any further purification. LCMS ( $\text{ES}^+$ , Method 3)  $m/z$  176.1  $[\text{M}+\text{H}]^+$ .  $^1\text{H}$  NMR (400 MHz,  $\text{DMSO}-d_6$ ):  $\delta$  13.62 (s, 1H), 7.76 (d,  $J = 8.8$  Hz, 1H), 7.57 - 7.45 (m, 3H), 7.23 (d,  $J = 9.2$  Hz, 1H), 2.37 (s, 3H).

## Scheme S3

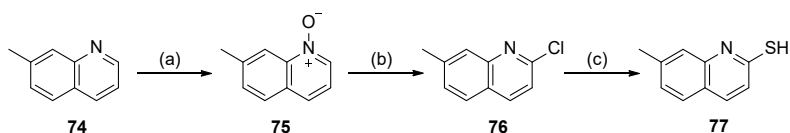

(a) m-CPBA, DCM, RT, 16 h, 72%; (b) POCl<sub>3</sub>, toluene, 70 °C, 16 h, 68%; (c) thiourea, EtOH, 80 °C, 16 h, 76%

### 7-Methyl-1-oxido-quinolin-1-ium (75)

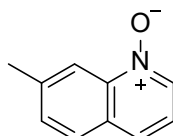

To a solution of 7-methylquinoline **74** (1.00 g, 6.98 mmol) in DCM (15 mL) was added meta-chloroperoxybenzoic acid (2.13 g, 10.5 mmol, 85% purity) and stirred at RT for 16 h. The reaction mixture was quenched with sat. aq. sodium bicarbonate solution (20 mL) and extracted with DCM (3 x 10mL). The combined organic layers were dried over sodium sulfate, filtered, and the filtrate was concentrated under reduced pressure. The residue was purified by reverse column chromatography (0.05% NH<sub>3</sub>·H<sub>2</sub>O in water/MeCN gradient 0-5%) to afford compound **75** (800 mg, 72% yield) as a brown solid. LCMS (ES<sup>+</sup>, Method 2) *m/z* 160.1 [M+H]<sup>+</sup>. <sup>1</sup>H NMR (400 MHz, DMSO-*d*<sub>6</sub>): δ 8.54 (d, *J* = 6.0 Hz, 1H), 8.35 (s, 1H), 7.98 (d, *J* = 8.4 Hz, 1H), 7.88 (d, *J* = 8.4 Hz, 1H), 7.57 (d, *J* = 8.4 Hz, 1H), 7.41 - 7.38 (m, 1H), 2.55 (s, 3H).

### 2-Chloro-7-methyl-quinoline (76)

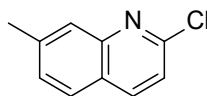

To a solution of compound **75** (500 mg, 3.14 mmol) in toluene (8 mL) was added phosphoryl chloride (583 μL, 6.28 mmol), and stirred at 70 °C for 16 h. The reaction mixture was cooled to 0 °C, quenched with water (20 mL), and the aqueous layer extracted with EtOAc (3 x 10 mL). The combined organic layers were washed with brine (3 x 10 mL), dried over sodium sulfate, filtered, and the filtrate was concentrated under reduced pressure. The residue was purified by flash column chromatography (petroleum ether/ethyl acetate gradient 2-50%) to afford compound **76** (380 mg, 68% yield) as a white solid. LCMS (ES<sup>+</sup>, Method 2) *m/z* 340.5 [M+H]<sup>+</sup>.



$^1\text{H}$  NMR (400 MHz,  $\text{CDCl}_3$ ):  $\delta$  8.05 (d,  $J$  = 8.4 Hz, 1H), 7.80 (s, 1H), 7.71 (d,  $J$  = 8.4 Hz, 1H), 7.40 (dd,  $J$  = 8.0, 0.8 Hz, 1H), 7.32 (d,  $J$  = 8.8 Hz, 1H), 2.57 (s, 3H).

### 7-Methylquinoline-2-thiol (**77**)

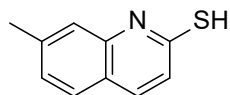

To a solution of compound **76** (200 mg, 1.13 mmol) in EtOH (3 mL) was added thiourea (257 mg, 3.38 mmol) and stirred at 80 °C for 16 h. The reaction mixture was cooled to RT and filtered. The filter-cake was collected and dried under reduced pressure to afford compound **77** (150 mg, 76% yield) as a yellow solid. The isolated material was used in the following step without any further purification. LCMS ( $\text{ES}^+$ , Method 4)  $m/z$  176.1  $[\text{M}+\text{H}]^+$ .  $^1\text{H}$  NMR (400 MHz,  $\text{DMSO}-d_6$ ):  $\delta$  13.58 (s, 1H), 7.78 (d,  $J$  = 8.8 Hz, 1H), 7.66 (d,  $J$  = 8.0 Hz, 1H), 7.40 (s, 1H), 7.20 - 7.17 (m, 2H), 2.41 (s, 3H).

### Scheme S4

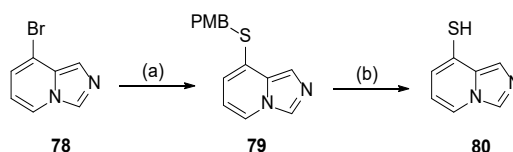

(a) (4-methoxyphenyl) methanethiol,  $\text{Pd}_2(\text{dba})_3$ , Xantphos,  $\text{Cs}_2\text{CO}_3$ , DMF, 100 °C, 16 h, 55%; (b) TFA, 70 °C, 16 h, 72%

### 8-[(4-methoxyphenyl)methylsulfanyl]imidazo[1,5-a]pyridine (**79**)

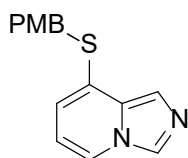

To a solution of 8-bromoimidazo[1,5-a]pyridine **78** (200 mg, 1.02 mmol) in DMF (5 mL) was added (4-methoxyphenyl)methanethiol (172 mg, 1.12 mmol),  $\text{Pd}_2(\text{dba})_3$  (46.5 mg, 0.05 mmol), Xantphos (58.7 mg, 0.10 mmol) and cesium carbonate (992 mg, 3.05 mmol) under inert atmosphere. The resulting mixture was stirred at 100 °C for 16 h. The reaction mixture was

cooled to RT, quenched with water (50 mL) and extracted with EtOAc (3 x 20 mL). The combined organic layers were washed with brine (3 x 20 mL), dried over sodium sulfate, filtered, and concentrated under reduced pressure. The residue was purified by flash column chromatography (petroleum ether/ethyl acetate gradient 2-50%) to afford compound **79** (150 mg, 55% yield) as a brown solid. LCMS (ES<sup>+</sup>, Method 1) *m/z* 271.1 [M+H]<sup>+</sup>. <sup>1</sup>H NMR (400 MHz, CDCl<sub>3</sub>): δ 8.13 (s, 1H), 7.80 (d, *J* = 6.8 Hz, 1H), 7.54 (s, 1H), 7.24 (d, *J* = 8.8 Hz, 2H), 6.86 - 6.82 (m, 2H), 6.58 (d, *J* = 6.4 Hz, 1H), 6.48 (t, *J* = 7.2 Hz, 1H), 4.18 (s, 2H), 3.80 (s, 3H).

### Imidazo[1,5-a]pyridine-8-thiol (**80**)

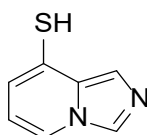

A solution of compound **79** (150 mg, 555 μmol) in trifluoroacetic acid (2 mL) was stirred at 70 °C for 16 h, cooled to RT and then concentrated under reduced pressure. The residue was purified by reverse column chromatography (0.05% TFA in water/MeCN gradient 0%-15%) to afford compound **80** (60.0 mg, 72% yield) as brown solid. <sup>1</sup>H NMR (400 MHz, CDCl<sub>3</sub>): δ 8.25 (s, 1H), 7.90 (d, *J* = 7.2 Hz, 1H), 7.60 (s, 1H), 6.96 (d, *J* = 6.8 Hz, 1H), 6.55 (t, *J* = 6.8 Hz, 1H).

### Scheme S5

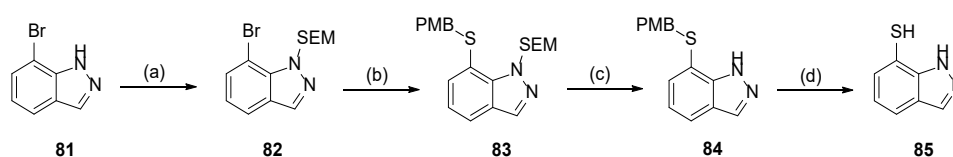

(a) SEM-Cl, NaH, THF, RT, 16 h, 66%; (b) (4-methoxyphenyl) methanethiol, Pd<sub>2</sub>(dba)<sub>3</sub>, Xantphos, Cs<sub>2</sub>CO<sub>3</sub>, dioxane, 100 °C, 16 h, 74%; (c) TBAF, 70 °C, 16 h, 22%; (d) TFA, 70 °C, 16 h, 50%

### 7-Bromo-1-((2-(trimethylsilyl)ethoxy)methyl)-1H-indazole (**82**)

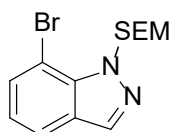

To a solution of 7-bromo-1H-indazole **81** (2.00 g, 10.2 mmol) in THF (20 mL) was added NaH (487 mg, 12.2 mmol, 60% dispersion in mineral oil) under inert atmosphere at 0 °C and stirred for 30 min. 2-(Trimethylsilyl)ethoxymethyl chloride (2.16 mL, 12.2 mmol) was then added and stirred at RT for 16 h. The reaction mixture was quenched with water (100 mL) and extracted with EtOAc (3 × 50 mL). The combined organic layers were washed with brine (50 mL), dried over sodium sulfate, filtered, and concentrated under reduced pressure. The residue was purified by flash column chromatography (petroleum ether/ethyl acetate gradient 0-30%) to afford compound **82** (2.2 g, 66% yield) as a yellow liquid. LCMS (ES<sup>+</sup>, Method 2) *m/z* 269.0 [M+H]<sup>+</sup>. <sup>1</sup>H NMR (400 MHz, CD<sub>3</sub>OD): δ 8.04 (s, 1H), 7.71 - 7.68 (m, 1H), 7.62 - 7.60 (m, 1H), 7.05 (t, *J* = 7.6 M Hz, 1H), 6.09 (s, 2H), 3.59 (t, *J* = 8.0 M Hz, 2H), 0.90 (t, *J* = 8.4 M Hz, 2H), -0.067 (s, 9H).

#### 7-((4-Methoxybenzyl)thio)-1-((2-(trimethylsilyl)ethoxy) methyl)- 1H-indazole (**83**)

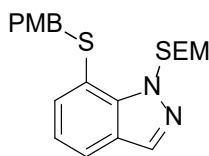

To a solution of compound **82** (2.20 g, 6.72 mmol) in DMF (20 mL) was added (4-methoxyphenyl) methanethiol (1.12 mL, 8.07 mmol), Pd<sub>2</sub>(dba)<sub>3</sub> (308 mg, 0.34 mmol), Xantphos (389 mg, 0.67 mmol) and cesium carbonate (6.57 g, 20.2 mmol) under inert atmosphere. The resulting mixture was heated at 100 °C for 16 h. The reaction mixture was cooled to RT, quenched with water (20 mL) and then extracted with EtOAc (3 × 20 mL). The combined organic layers were washed with brine (20 mL), dried over sodium sulphate, filtered, and concentrated under reduced pressure. The residue was purified by flash column chromatography (petroleum ether/ethyl acetate gradient 0-20%) to afford compound **83** (2.00 g, 74% yield) as yellow liquid. LCMS (ES<sup>+</sup>, Method 1) *m/z* 400.9 [M+H]<sup>+</sup>.

#### S7-((4-Methoxybenzyl)thio)-1H-indazole (**84**)

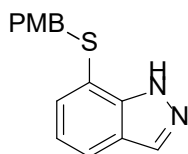

A mixture of compound **83** (1.66 g, 3.25 mmol) and TBAF (15 mL, 10.0 mmol, 1 M in THF) was stirred at 70 °C for 16 h. The reaction mixture was cooled to RT, quenched with water (15 mL) and extracted with EtOAc (3 × 15 mL). The combined organic layers were washed with brine (15 mL), dried over sodium sulphate, filtered and concentrated under reduced pressure. The residue was purified by flash column chromatography (petroleum ether/ethyl acetate gradient 0-20%) to afford compound **84** (360 mg, 22% yield) as a yellow solid. LCMS (ES<sup>+</sup>, Method 1)  $m/z$  271.2 [M+H]<sup>+</sup>.

### 1H-Indazole-7-thiol (**85**)

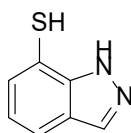

A solution of compound **84** (360 mg, 1.33 mmol) in trifluoroacetic acid (3.00 mL, 40.5 mmol) was stirred at 70 °C for 16 h. The reaction mixture was cooled to RT concentrated under reduced pressure and the residue was purified by flash column chromatography (SWPAFLASH® SW040 Bonded Spherical C18, 20-45μm, 100 Å; 0.1% TFA in water/MeCN gradient 0-100%) to afford compound **85** (100 mg, 50% yield) as a yellow solid. LCMS (ES<sup>+</sup>, Method 3)  $m/z$  151.1 [M+H]<sup>+</sup>. <sup>1</sup>H NMR (400 MHz, CD<sub>3</sub>OD): δ 8.14 (s, 1H), 7.81 - 7.79 (m, 1H), 7.11 - 7.09 (m, 1H) 7.00 - 6.96 (m, 1H).

### Scheme S6

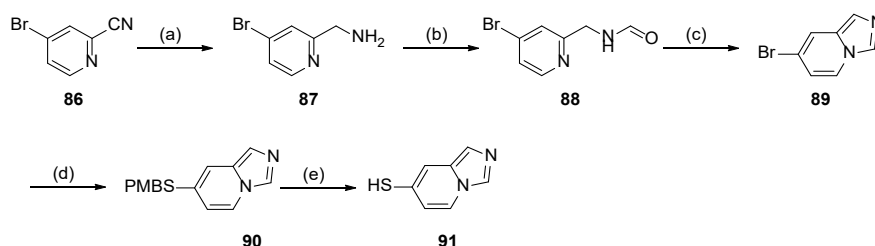

(a)  $\text{BH}_3$ -THF, THF, RT, 16 h, 49%; (b)  $\text{HCO}_2\text{H}$ , 100 °C, 3 h; (c) TFAA, DCM, RT, 1 h, 43%; (d) (4-methoxyphenyl)methanethiol,  $\text{Pd}_2(\text{dba})_3$ , Xantphos,  $\text{Cs}_2\text{CO}_3$ , dioxane, 100 °C, 16h, 85%, (e) TFA, 70 °C, 16 h, 67%

#### (4-Bromo-2-pyridyl)methanamine (**87**)

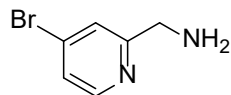

To a solution of 4-bromopyridine-2-carbonitrile **86** (3.00 g, 16.3 mmol) in THF (30 mL) was added dropwise borane (75.0 mL, 1 M in THF) under inert atmosphere and stirred at RT for 16 h. The reaction mixture was cooled to 0 °C, HCl (75.0 mL, 2M aq.) was then added and heated to 80 °C for 30 min. The reaction mixture was cooled to RT, basified to pH = 8 using 2M aq. sodium hydroxide and then extracted with EtOAc (3 x 30 mL). The combined organic layers were washed with brine (30 mL), dried over sodium sulfate, filtered, and the filtrate was concentrated under reduced pressure. The residue was purified by reverse column chromatography (0.05%  $\text{NH}_3 \cdot \text{H}_2\text{O}$  in water/MeCN gradient 0-30%) to afford compound **87** (1.50 g, 48.9% yield) as yellow oil. LCMS ( $\text{ES}^+$ , Method 5)  $m/z$  189.0  $[\text{M}+\text{H}]^+$ .  $^1\text{H}$  NMR (400 MHz,  $\text{DMSO}-d_6$ ):  $\delta$  8.37 (d,  $J$  = 5.6 Hz, 1H), 7.74 (d,  $J$  = 1.6 Hz, 1H), 7.51 (dd,  $J$  = 5.2, 2.0 Hz, 1H), 3.82 (s, 2H).

#### *N*-[(4-Bromo-2-pyridyl)methyl]formamide (**88**)

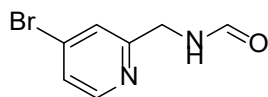

A solution of (4-bromo-2-pyridyl)methanamine **87** (1.50 g, 8.02 mmol) in formic acid (75.00 mL, 1.99 mol) was heated to 100 °C and stirred for 3 h. The mixture was cooled to RT and concentrated under reduced pressure. The residue was dissolved in sat. aq. sodium bicarbonate solution (50 mL) and extracted with DCM (3 x 50 mL). The combined organic layers were concentrated under reduced pressure to afford crude compound **88** which was used in the following step without any further purification (1.70 g) as a yellow solid.  $^1\text{H}$  NMR (400 MHz,  $\text{CDCl}_3$ ):  $\delta$  8.37 (d,  $J$  = 5.2 Hz, 1H), 8.34 (s, 1H), 7.49 (s, 1H), 7.41 (d,  $J$  = 5.2 Hz, 1H), 4.60 (d,  $J$  = 5.2 Hz, 2H).

### 7-Bromoimidazo[1,5-a]pyridine (**89**)

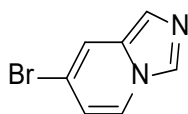

To a solution of compound **88** (1.7 g, 7.91 mmol) in DCM (20 mL) was added trifluoroacetic anhydride (1.21 mL, 8.70 mmol) at 0 °C. The reaction mixture was warmed gradually to RT and stirred for 1 h. The reaction was quenched with sat. aq. sodium bicarbonate solution (2 mL) and water (10 mL), and the mixture was extracted with DCM (3 x 5 mL). The combined organic layers were dried over sodium sulfate, filtered, and the filtrate was concentrated under reduced pressure. The residue was purified by flash column chromatography (petroleum ether/ethyl acetate gradient 2-50%) to afford compound **89** (680 mg, 43% yield) as yellow oil. <sup>1</sup>H NMR (400 MHz, CDCl<sub>3</sub>): δ 8.09 (s, 1H), 7.80 (d, *J* = 7.2 Hz, 1H), 7.64 (s, 1H), 7.37 (s, 1H), 6.62 (dd, *J* = 7.2, 1.2 Hz, 1H).

### 7-[(4-Methoxyphenyl)methylsulfanyl]imidazo[1,5-a]pyridine (**90**)

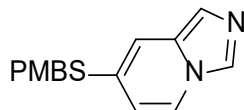

To a solution of compound **89** (680 mg, 3.45 mmol) in DMF (10 mL) was added (4-methoxyphenyl)methanethiol (527 μL, 3.80 mmol), Pd<sub>2</sub>(dba)<sub>3</sub> (158 mg, 0.17 mmol), Xantphos (199 mg, 0.35 mmol) and cesium carbonate (3.37 g, 10.3 mmol) under inert atmosphere and stirred at 100 °C for 16 h. The reaction mixture was cooled to RT, quenched with water (20 mL) and extracted with EtOAc (3 x 10 mL). The combined organic layers were washed with brine (3 x 10 mL), dried over sodium sulfate, filtered and the filtrate was concentrated under reduced pressure. The residue was purified by flash column chromatography (petroleum ether/ethyl acetate gradient 2-50%) to afford compound **90** (800 mg, 85% yield) as yellow oil. LCMS (ES<sup>+</sup>, Method 6) *m/z* 271.1 [M+H]<sup>+</sup>. <sup>1</sup>H NMR (400 MHz, CDCl<sub>3</sub>): δ 8.02 (d, *J* = 4.4 Hz, 2H), 7.80 (d, *J* = 7.6 Hz, 1H), 7.28 (d, *J* = 5.2 Hz, 1H), 7.25 - 7.22 (m, 2H), 6.85 - 6.83 (m, 2H), 6.44 (dd, *J* = 7.2, 1.6 Hz, 1H), 4.08 (s, 2H), 3.79 (s, 3H).

### Imidazo[1,5-a]pyridine-7-thiol (**91**)

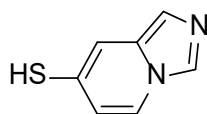

A solution of compound **90** (800 mg, 2.96 mmol) in trifluoroacetic acid (16.00 mL 216.1 mmol) was heated to 70 °C and stirred for 16 h. The reaction mixture was cooled to RT and concentrated under reduced pressure. The residue was purified by reverse column chromatography (0.05% TFA in water/MeCN gradient 0-10%) to afford compound **91** (300 mg, 67% yield) as a yellow solid. <sup>1</sup>H NMR (400 MHz, DMSO-*d*<sub>6</sub>): δ 9.00 (s, 1H), 8.46 (d, *J* = 8.4 Hz, 1H), 7.90 (s, 1H), 7.70 (s, 1H), 7.01 (d, *J* = 7.6 Hz, 1H).

### 1.9.2 Synthesis of compounds **4** and **6**

#### Scheme S7

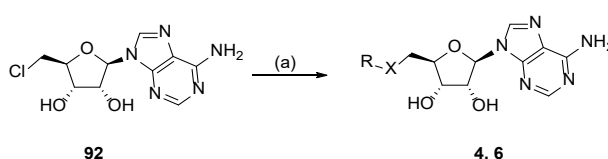

(a) R-XH, NaO<sup>t</sup>Bu, DMF, 75 °C, 10 h, 44-67%.

### (2R,3R,4S,5S)-2-(6-Amino-9H-purin-9-yl)-5-((hexylthio)methyl)tetrahydrofuran-3,4-diol (**4**)

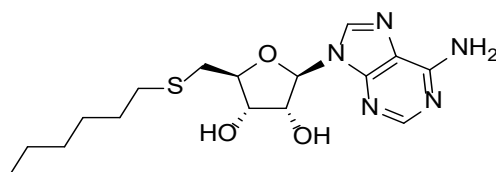

To a solution of (2R,3R,4S,5S)-2-(6-amino-9H-purin-9-yl)-5-(chloromethyl)tetrahydrofuran-3,4-diol **92** (500 mg, 1.75 mmol) in DMF (10 mL) was added hexane-1-thiol (494 μL, 3.50 mmol), potassium *t*-butoxide (393 mg, 3.50 mmol) and stirred at 75 °C for 10 h. The reaction mixture was cooled to RT and quenched with water. The resulting suspension was filtered off and the isolated solid material was dissolved in DMF. To the solution was then added water and the resulting precipitate was filtered off and washed with MeCN to afford compound **4** (222 mg, 34% yield) as a white solid. LCMS (ES<sup>+</sup>) *m/z* 368.4 [M+H]<sup>+</sup>. <sup>1</sup>H NMR (400 MHz, DMSO-*d*<sub>6</sub>): δ 8.35 (s, 1H) 8.14 (s, 1H) 7.29 (s, 2H) 5.88 (d, *J* = 5.58 Hz, 1H) 5.49 (d, *J* = 5.83 Hz, 1H) 5.31

(d,  $J = 5.07$  Hz, 1H) 4.77 (d,  $J = 5.32$  Hz, 1H) 4.10 - 4.19 (m, 1H) 3.92 - 4.05 (m, 1H) 2.74 - 2.94 (m, 2H) 2.45 - 2.49 (m, 2H) 1.36 - 1.52 (m, 2H) 1.09 - 1.31 (m, 6H) 0.72 - 0.89 (m, 3H).  $^{13}\text{C}$  NMR (126 MHz,  $\text{DMSO-}d_6$ )  $\delta$  156.09, 152.62, 149.46, 139.90, 119.19, 87.42, 84.23, 72.63, 72.53, 33.93, 31.85, 30.77, 29.11, 27.84, 21.99, 13.89.  $[\alpha]_D^{20} = +30.7$  ( $c=0.01$ , MeOH).

**(2R,3R,4S,5S)-2-(6-Amino-9H-purin-9-yl)-5-((naphthalen-2-ylthio)methyl)tetrahydrofuran-3,4-diol (**6**)**

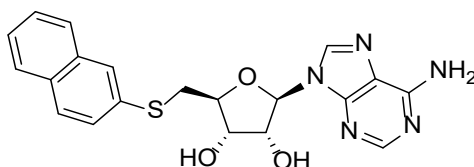

To a solution of (2R,3R,4S,5S)-2-(6-amino-9H-purin-9-yl)-5-(chloromethyl)tetrahydrofuran-3,4-diol **92** (500 mg, 1.75 mmol) in DMF (10 mL) was added 2-naphthalenethiol (561 mg, 3.50 mmol), potassium t-butoxide (393 mg, 3.50 mmol) and stirred at 75 °C for 10 h. The reaction mixture was cooled to RT and quenched with water. The resulting suspension was filtered off and the isolated solid material was dissolved in DMF. To the solution was then added water and the resulting precipitate was filtered off and washed with MeCN to afford compound **6** (480 mg, 67% yield) as a white solid. LCMS ( $\text{ES}^+$ )  $m/z$  410.4  $[\text{M}+\text{H}]^+$ .  $^1\text{H}$  NMR (400 MHz,  $\text{DMSO-}d_6$ ):  $\delta$  8.39 (s, 1 H) 8.16 (s, 1 H) 7.81 - 7.89 (m, 3 H) 7.75 - 7.80 (m, 1 H) 7.42 - 7.53 (m, 3 H) 7.32 (s, 2 H) 5.90 (d,  $J = 5.83$  Hz, 1 H) 5.54 (d,  $J = 6.34$  Hz, 1 H) 5.40 (d,  $J = 5.07$  Hz, 1 H) 4.80 - 4.89 (m, 1 H) 4.19 - 4.29 (m, 1 H) 3.99 - 4.11 (m, 1 H) 3.50 - 3.59 (m, 1 H) 3.39 - 3.49 (m, 1 H).  $^{13}\text{C}$  NMR (126 MHz,  $\text{DMSO-}d_6$ )  $\delta$  156.12, 152.67, 149.48, 139.97, 133.55, 133.39, 131.12, 128.38, 127.60, 126.86, 126.69, 126.52, 125.64, 125.33, 119.23, 87.50, 82.89, 72.77, 72.61, 34.96.

### 1.9.3 Synthesis of compounds 18 and 19

#### Scheme S8



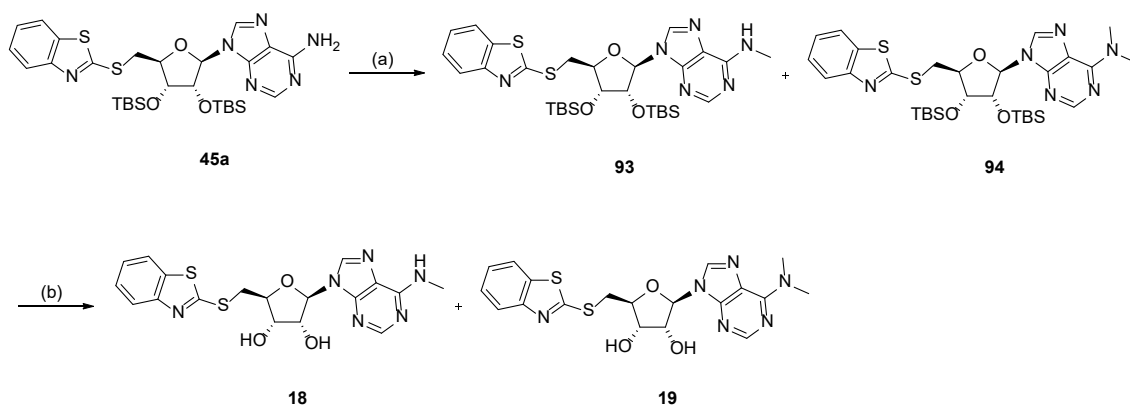

(a) MeI, Cs<sub>2</sub>CO<sub>3</sub>, DMF, RT, 16 h, 58%; (b) Et<sub>3</sub>N·3HF, THF, RT, 16 h, 26-59%.

**9-[(2*R*,3*R*,4*R*,5*S*)-5-(1,3-Benzothiazol-2-ylsulfanylmethyl)-3,4-bis[[tert-butyl(dimethyl) silyl]oxy]tetrahydrofuran-2-yl]-*N*-methyl-purin-6-amine (**93**) and 9-[(2*R*,3*R*,4*R*,5*S*)-5-(1,3-Benzothiazol-2-ylsulfanylmethyl)-3,4-bis[[tert-butyl(dimethyl) silyl]oxy]tetrahydrofuran-2-yl]-*N,N*-dimethyl-purin-6-amine (**94**)**

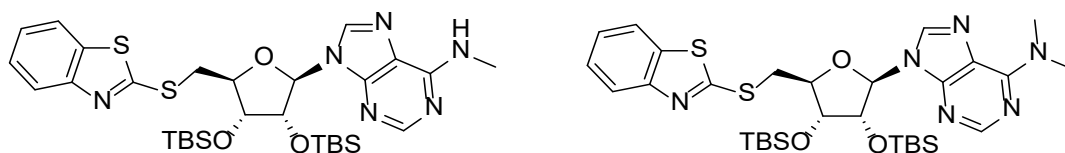

To a solution of compound **45a** (50.0 mg, 77.5  $\mu$ mol) in DMF (1 mL) was added cesium carbonate (25.2 mg, 77.5  $\mu$ mol) and methyl iodide (4.83  $\mu$ L, 77.5  $\mu$ mol) and stirred at RT for 16 h. The reaction mixture was quenched with water (20 mL) and extracted with EtOAc (3 x 30 mL). The combined organic layers were washed with brine (3 x 20 mL), dried over sodium sulfate, filtered, and the filtrate was concentrated under reduced pressure. The residue was purified by flash column chromatography (petroleum ether/ethyl acetate gradient 2-50%) to afford compound **93** (30.0 mg, 58% yield) as yellow oil and compound **94** (30.0 mg, 58% yield) as yellow oil. Compound **93** LCMS (ES<sup>+</sup>, Method 2)  $m/z$  659.5 [M+H]<sup>+</sup>. <sup>1</sup>H NMR (400 MHz, CDCl<sub>3</sub>):  $\delta$  8.41 (s, 1H), 7.91 (s, 1H), 7.85 (d,  $J$  = 7.6 Hz, 1H), 7.76 (d,  $J$  = 8.0 Hz, 1H), 7.42 (t,  $J$  = 7.6 Hz, 1H), 7.31 (t,  $J$  = 7.6 Hz, 1H), 5.87 (d,  $J$  = 6.8 Hz, 1H), 5.82 (s, 1H), 5.34 (dd,  $J$  = 5.6, 4.4 Hz, 1H), 4.50 (t,  $J$  = 6.0 Hz, 1H), 4.39 (d,  $J$  = 2.8 Hz, 1H), 4.05 (dd,  $J$  = 14.0, 6.4 Hz, 1H), 3.89 (dd,  $J$  = 14.0, 6.8 Hz, 1H), 3.23 (s, 3H), 0.93 (s, 9H), 0.76 (s, 9H), 0.12 (s, 6H), -0.12 (s, 3H), -0.38 (s, 3H). Compound **94** LCMS (ES<sup>+</sup>, Method 3)  $m/z$  673.2 [M+H]<sup>+</sup>. <sup>1</sup>H NMR (400 MHz, CDCl<sub>3</sub>):  $\delta$  8.47 (s, 1H), 8.25 (s, 1H), 8.00 (d,  $J$  = 7.6 Hz, 1H), 7.81 (d,  $J$  = 8.0 Hz, 1H), 7.48 (td,  $J$  = 8.4, 1.2 Hz, 1H), 7.37 (td,  $J$  = 8.4, 1.2 Hz, 1H), 5.97 (d,  $J$  = 7.6 Hz, 1H), 5.27 (dd,  $J$  = 7.6, 4.4 Hz, 1H), 4.45 (d,

$J = 4.4$  Hz, 1H), 4.32 (t,  $J = 6.8$  Hz, 1H), 4.07 - 4.04 (m, 1H), 3.80 (dd,  $J = 14.0, 7.2$  Hz, 1H), 3.51 (s, 6H), 0.88 (s, 9H), 0.68 (s, 9H), 0.08 (s, 6H), -0.13 (s, 3H), -0.45 (s, 3H).

**(2*S*,3*S*,4*R*,5*R*)-2-(1,3-Benzothiazol-2-ylsulfanylmethyl)-5-[6-(methylamino)purin-9-yl]tetrahydrofuran-3,4-diol (**18**)**

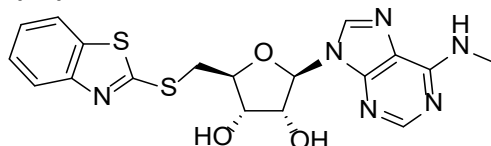

To a solution of compound **93** (30.0 mg, 45.5  $\mu$ mol) in THF (2 mL) was added N,N-diethylethanamine trihydrofluoride (22.0 mg, 136  $\mu$ mol) and stirred at 50 °C for 16 h. The reaction mixture was cooled to RT and concentrated under reduced pressure. The residue was purified by prep-HPLC (Method 7) to afford compound **18** (5.10 mg, 26% yield) as a white solid. HRMS (Method 1)  $m/z$   $[M+H]^+$  calcd for  $C_{18}H_{18}N_6O_3S_2$  431.0960; found 431.0970;  $^1H$  NMR (400 MHz, DMSO- $d_6$ ):  $\delta$  8.37 (s, 1H), 8.24 (s, 1H), 7.99 (d,  $J = 8.0$  Hz, 1H), 7.85 (d,  $J = 8.0$  Hz, 1H), 7.78 (s, 1H), 7.46 (td,  $J = 8.4, 1.2$  Hz, 1H), 7.36 (td,  $J = 7.6, 1.2$  Hz, 1H), 5.92 (d,  $J = 5.6$  Hz, 1H), 5.56 (d,  $J = 6.0$  Hz, 1H), 5.46 (d,  $J = 4.8$  Hz, 1H), 4.86 (q,  $J = 5.2$  Hz, 1H), 4.29 - 4.22 (m, 2H), 3.86 (dd,  $J = 13.6, 5.6$  Hz, 1H), 3.75 (dd,  $J = 13.6, 7.6$  Hz, 1H), 3.31 (s, 3H). SFC (Method 2) de% = 100%.

**(2*S*,3*S*,4*R*,5*R*)-2-((benzo[d]thiazol-2-ylthio)methyl)-5-(6-(dimethylamino)-9H-purin-9-yl)tetrahydrofuran-3,4-diol (**19**)**

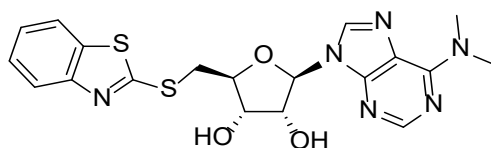

To a solution of compound **94** (200 mg, 297  $\mu$ mol) in THF (5 mL) was added N,N-diethylethanamine;trihydrofluoride (143 mg, 891  $\mu$ mol) and stirred at 50 °C for 16 h. The reaction mixture was cooled to RT and concentrated under reduced pressure. The residue was purified by reverse column chromatography (0.05%  $NH_3 \cdot H_2O$  in water/MeCN gradient 0-5%) and then triturated with MeOH (10 mL) to afford compound **19** (80.6 mg, 59% yield) as a white solid. HRMS (Method 1)  $m/z$   $[M+H]^+$  calcd for  $C_{19}H_{20}N_6O_3S_2$  445.1117; found 445.1135.  $^1H$

NMR (400 MHz, DMSO-*d*<sub>6</sub>):  $\delta$  8.40 (s, 1H), 8.23 (s, 1H), 8.00 (d, *J* = 7.6 Hz, 1H), 7.85 (d, *J* = 8.0 Hz, 1H), 7.47 (td, *J* = 8.4, 1.2 Hz, 1H), 7.36 (td, *J* = 8.4, 1.2 Hz, 1H), 5.95 (d, *J* = 5.6 Hz, 1H), 5.47 (d, *J* = 5.2 Hz, 1H), 4.84 (q, *J* = 5.2 Hz, 1H), 4.29 - 4.23 (m, 2H), 3.86 (dd, *J* = 13.6, 5.2 Hz, 1H), 3.74 (dd, *J* = 13.6, 7.6 Hz, 1H), 3.46 (brs, 6H). SFC (Method 2) de% = 100%.  $[\alpha]_D^{20}$  = +25.0 (c=0.1, MeOH).

#### 1.9.4 Synthesis of compounds 20-22

##### Scheme S9

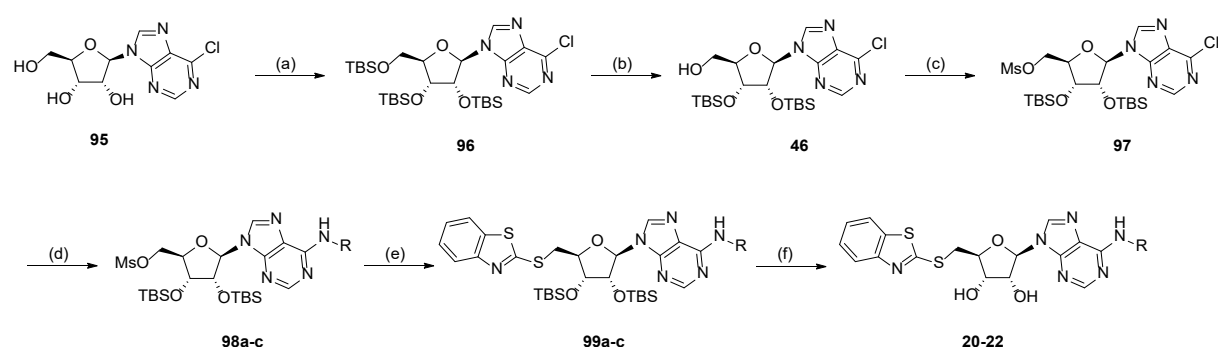

(a) TBS-Cl, 1H-imidazole, DMF, RT, 16 h, 91%; (b) CCl<sub>3</sub>COOH, THF, H<sub>2</sub>O, 0 °C, 56%; (c) Ms<sub>2</sub>O, TEA, THF, RT, 18%; (d) TEA, KI, THF, RT, 32 h, 75-92%; (e) DMF, 50 °C, 16 h, 70-90%; (f) KF, MeOH, 60 °C, 16 h, 24-61%.

##### [(2*R*,3*R*,4*S*,5*R*)-3,4-Bis[[*tert*-butyl(dimethyl)silyl]oxy]-5-(6-chloropurin-9-yl)tetrahydrofuran-2-yl]methoxy-*tert*-butyl-dimethyl-silane (96)

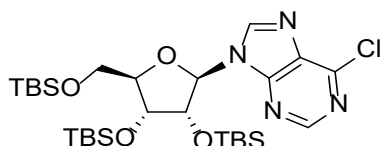

To a solution of (2*R*,3*R*,4*S*,5*R*)-2-(6-chloropurin-9-yl)-5-(hydroxymethyl)tetrahydrofuran-3,4-diol **95** (10.0 g, 34.9 mmol) in DMF (40 mL) was added imidazole (26.1 g, 383 mmol) and *tert*-butylchlorodimethylsilane (28.9 g, 191 mmol). The resulting mixture was stirred at RT for 16 h. The reaction was quenched with water (200 mL) and extracted with EtOAc (3 x 100 mL). The combined organic layers were washed with brine (3 x 50 mL), dried over sodium sulfate, filtered, and the filtrate was concentrated under reduced pressure. The residue was purified by flash column chromatography (petroleum ether/ethyl acetate gradient 2-20%) to afford compound **96** (20.0 g, 91% yield) as a white solid. <sup>1</sup>H NMR (400 MHz, CDCl<sub>3</sub>):  $\delta$  8.75 (s, 1H), 8.56 (s, 1H), 6.13 (d, *J* = 5.2 Hz, 1H), 4.59 (t, *J* = 4.4 Hz, 1H), 4.31 (t, *J* = 4.0 Hz, 1H), 4.18 - 4.15

(m, 1H), 4.03 (dd,  $J = 11.6, 3.6$  Hz, 1H), 3.81 (dd,  $J = 11.2, 3.2$  Hz, 1H), 0.97 (s, 9H), 0.94 (s, 9H), 0.79 (s, 9H), 0.16 (s, 3H), 0.15 (s, 3H), 0.11 (s, 3H), 0.10 (s, 3H), -0.03 (s, 3H), -0.24 (s, 3H).

**[(2*R*,3*R*,4*R*,5*R*)-3,4-Bis[[*tert*-butyl(dimethyl)silyl]oxy]-5- (6-chloropurin-9-yl) tetrahydrofuran-2-yl]methanol (**46**)**

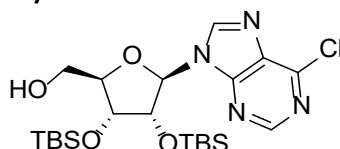

To a solution of compound **96** (5.00 g, 7.94 mmol) in THF (50 mL) was added dropwise a solution of 2,2,2-trichloroacetic acid (12.9 g, 79.4 mmol) in water (15 mL) at 0 °C. The reaction mixture was stirred at 0 °C for 1 h, before being quenched with sat. aq. sodium bicarbonate (50 mL). The aqueous layer was extracted with EtOAc (3 × 50 mL). The combined organic layers were washed with brine (2 × 30 mL), dried over sodium sulfate, filtered, and the filtrate concentrated under reduced pressure. The residue was purified by flash column chromatography (petroleum ether/ethyl acetate 25%) to afford compound **46** (2.30 g, 56% yield) as a white solid. LCMS (ES<sup>+</sup>, Method 7)  $m/z$  515.2 [M+H]<sup>+</sup>; <sup>1</sup>H NMR (400 MHz, CDCl<sub>3</sub>):  $\delta$  8.79 (s, 1H), 8.21 (s, 1H), 5.89 (d,  $J = 8.0$  Hz, 1H), 5.53 (brs, 1H), 4.99 (dd,  $J = 8.0, 0.8$  Hz, 1H), 4.35 (d,  $J = 4.4$  Hz, 1H), 4.20 (s, 1H), 3.97 (dd,  $J = 13.2, 2.0$  Hz, 1H), 3.75 (d,  $J = 13.2$  Hz, 1H), 0.96 (s, 9H), 0.75 (s, 9H), 0.14 (d,  $J = 5.2$  Hz, 6H), -0.12 (s, 3H), -0.64 (s, 3H).

**[(2*R*,3*R*,4*R*,5*R*)-3,4-Bis[[*tert*-butyl(dimethyl)silyl]oxy]-5- (6-chloropurin-9-yl) tetrahydrofuran-2-yl]methyl methanesulfonate (**97**)**

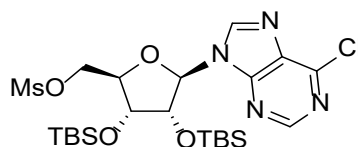

To a solution of compound **46** (2.20 g, 4.27 mmol) and triethylamine (11.9 mL, 85.4 mmol) in THF (10 mL) was added a solution of methanesulfonic anhydride (7.44 g, 42.7 mmol) in THF (10 mL). The reaction mixture was stirred at RT for 30 min before being quenched with sat. aq. sodium bicarbonate solution (20 mL). The aqueous layer was extracted with EtOAc (3 × 20 mL). The combined organic layers were washed with brine (2 × 10 mL), dried over sodium sulfate, filtered, and the filtrate was concentrated under reduce pressure. The residue was purified by

flash column chromatography (petroleum ether/ethyl acetate 18%) to afford compound **97** (2.10 g, 83% yield) as a white solid. LCMS (ES<sup>+</sup>, Method 7) *m/z* 593.2 [M+H]<sup>+</sup>; <sup>1</sup>H NMR (400 MHz, CDCl<sub>3</sub>): δ 8.78 (s, 1H), 8.34 (s, 1H), 6.01 (d, *J* = 4.8 Hz, 1H), 4.92 - 4.89 (m, 1H), 4.61 - 4.59 (m, 1H), 4.49 - 4.44 (m, 1H), 4.38 - 4.35 (m, 2H), 3.05 (s, 3H), 0.94 (s, 9H), 0.82 (s, 9H), 0.14 (s, 3H), 0.13 (s, 3H), 0.01 (s, 3H), -0.20 (s, 3H).

**[(2R,3R,4R,5R)-3,4-Bis[[tert-butyl(dimethyl)silyl]oxy]-5-[6-(cyclopentylamino)purin-9-yl]tetrahydrofuran-2-yl]methyl methanesulfonate (98a)**

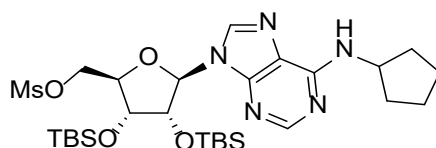

To a solution of compound **97** (500 mg, 0.85 mmol) in THF (5 mL) was added triethylamine (352 μL, 2.53 mmol), potassium iodide (69.9 mg, 0.42 mmol) and cyclopentanamine (332 μL, 3.37 mmol). The reaction mixture was stirred at RT for 32 h and then concentrated under reduced pressure. The residue was purified by flash column chromatography (petroleum ether/ethyl acetate gradient 2-75%) to afford compound **98a** (420 mg, 77% yield) as colorless oil. LCMS (ES<sup>+</sup>, Method 1) *m/z* 642.4 [M+H]<sup>+</sup>. <sup>1</sup>H NMR (400 MHz, CDCl<sub>3</sub>): δ 8.34 (s, 1H), 7.85 (s, 1H), 5.86 (d, *J* = 4.8 Hz, 1H), 5.82 (s, 1H), 5.03 (t, *J* = 4.8 Hz, 1H), 4.60 (dd, *J* = 11.2, 4.0 Hz, 1H), 4.53 (dd, *J* = 11.2, 4.0 Hz, 1H), 4.42 (t, *J* = 4.0 Hz, 1H), 4.33 - 4.31 (m, 1H), 2.99 (s, 3H), 2.16 - 2.10 (m, 2H), 1.80 - 1.76 (m, 2H), 1.73 - 1.68 (m, 2H), 1.58 - 1.56 (m, 2H), 0.94 (s, 9H), 0.82 (s, 9H), 0.14 (s, 3H), 0.13 (s, 3H), -0.02 (s, 3H), -0.23 (s, 3H).

**[(2R,3R,4R,5R)-3,4-Bis((tert-butyldimethylsilyl)oxy)-5-(6-(isopropylamino)-9H-purin-9-yl)tetrahydrofuran-2-yl]methyl methanesulfonate (98b)**

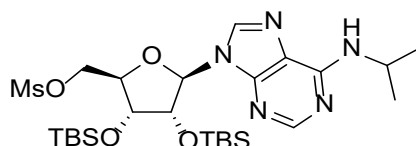

To a solution of compound **97** (250 mg, 0.42 mmol) in THF (2 mL) was added triethylamine (176 μL, 1.26 mmol), potassium iodide (35.0 mg, 0.21 mmol) and propan-2-amine (1.45 μL, 1.69 mmol). The reaction mixture was stirred at RT for 16 h and then concentrated under

reduced pressure. The residue was purified by preparative TLC (SiO<sub>2</sub>, petroleum ether/ethyl acetate 75%) to afford compound **98b** (230 mg, 92% yield) as yellow oil. LCMS (ES<sup>+</sup>, Method 1) *m/z* 616.3 [M+H]<sup>+</sup>. <sup>1</sup>H NMR (400 MHz, CDCl<sub>3</sub>): δ 8.34 (s, 1H), 7.86 (s, 1H), 5.87 (d, *J* = 4.8 Hz, 1H), 5.75 - 5.65 (m, 1H), 5.03 (t, *J* = 4.8 Hz, 1H), 4.63 - 4.59 (m, 1H), 4.56 - 4.51 (m, 1H), 4.43 - 4.41 (m, 1H), 4.34 - 4.31 (m, 1H), 2.99 (s, 3H), 1.34 - 1.32 (m, 6H), 1.29 - 1.22 (m, 1H), 0.98 - 0.89 (m, 10H), 0.86 - 0.79 (m, 10H), 0.15 - 0.13 (m, 6H), -0.22 (s, 3H).

**[(2*R*,3*R*,4*R*,5*R*)-3,4-Bis[[*tert*-butyl(dimethyl)silyl]oxy]-5-[6-(oxetan-3-ylamino)purin-9-yl]tetrahydrofuran-2-yl]methyl methanesulfonate (98c)**

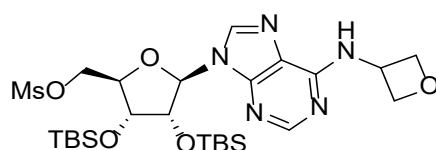

To a solution of compound **97** (500 mg, 0.84 mmol) in THF (5 mL) was added triethylamine (352 μL, 2.53 mmol), potassium iodide (69.9 mg, 0.42 mmol) and oxetan-3-amine (246 mg, 3.37 mmol). The reaction mixture was stirred at RT for 16 h and then concentrated under reduced pressure. The residue was purified by flash column chromatography (petroleum ether/ethyl acetate gradient 2-20%) to afford compound **98c** (400 mg, 75% yield) as a colorless oil. LCMS (ES<sup>+</sup>, Method 3) *m/z* 630.1 [M+H]<sup>+</sup>. <sup>1</sup>H NMR (400 MHz, CDCl<sub>3</sub>): δ 8.34 (s, 1H), 7.93 (s, 1H), 5.88 (d, *J* = 5.2 Hz, 1H), 5.47 (s, 1H), 5.07 (t, *J* = 7.2 Hz, 2H), 5.01 (t, *J* = 4.4 Hz, 1H), 4.70 - 4.66 (m, 2H), 4.60 (dd, *J* = 11.2, 4.4 Hz, 1H), 4.52 (dd, *J* = 10.8, 5.2 Hz, 1H), 4.40 (t, *J* = 4.0 Hz, 1H), 4.33 - 4.31 (m, 1H), 3.00 (s, 3H), 0.95 (s, 9H), 0.81 (s, 9H), 0.14 (s, 3H), 0.13 (s, 3H), -0.02 (s, 3H), -0.24 (s, 3H).

**9-[(2*R*,3*R*,4*R*,5*S*)-5-(1,3-Benzothiazol-2-ylsulfanylmethyl)-3,4-bis [[*tert*-butyl(dimethyl)silyl]oxy]tetrahydrofuran-2-yl]-*N*-cyclopentyl-purin-6-amine (99a)**

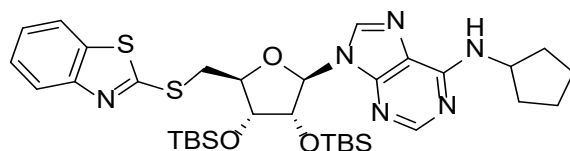

To a solution of compound **98a** (400 mg, 0.62 mmol) in DMF (5 mL) was added 1,3-benzothiazol-2-ylsulfanyl sodium (353 mg, 1.87 mmol) and stirred at 50 °C for 16 h. The reaction mixture was cooled to RT, quenched with water (30 mL) and extracted with EtOAc (3

x 15 mL). The combined organic layers were washed with brine (3 x 10 mL), dried over sodium sulfate, filtered and the filtrate was concentrated under reduced pressure. The residue was purified by flash column chromatography (petroleum ether/ethyl acetate gradient 2-100%) to afford compound **99a** (400 mg, 90% yield) as a white solid. LCMS (ES<sup>+</sup>, Method 3) *m/z* 713.3 [M+H]<sup>+</sup>. <sup>1</sup>H NMR (400 MHz, CDCl<sub>3</sub>): δ 8.37 (s, 1H), 7.86 (s, 1H), 7.84 (s, 1H), 7.75 (d, *J* = 8.0 Hz, 1H), 7.44 - 7.40 (m, 1H), 7.32 - 7.28 (m, 1H), 5.87 - 5.84 (m, 2H), 5.33 (dd, *J* = 6.4, 4.4 Hz, 1H), 4.49 (td, *J* = 6.8, 1.6 Hz, 1H), 4.39 (dd, *J* = 4.0, 2.0 Hz, 1H), 4.05 (dd, *J* = 14.0, 6.0 Hz, 1H), 3.87 (dd, *J* = 14.0, 7.2 Hz, 1H), 2.18 - 2.12 (m, 2H), 1.74 - 1.67 (m, 4H), 1.63 - 1.55 (m, 2H), 0.93 (s, 9H), 0.76 (s, 9H), 0.12 (s, 3H), 0.11 (s, 3H), -0.11 (s, 3H), -0.36 (s, 3H).

**9-((2R,3R,4R,5S)-5-((Benzo[d]thiazol-2-ylthio)methyl)-3,4-bis((tert-butyl dimethylsilyl)oxy)tetrahydrofuran-2-yl)-N-isopropyl-9H-purin-6-amine (99b)**

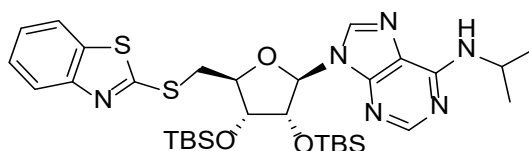

To a solution of compound **98b** (230 mg, 0.37 mmol) in DMF (3 mL) was added 1,3-benzothiazol-2-ylsulfanyl sodium (212 mg, 1.12 mmol) and stirred at 50 °C for 16 h. The reaction mixture was cooled to RT, quenched with water (5 mL) and then extracted with EtOAc (3 x 10 mL). The combined organic layers were washed with brine (15 mL), dried over sodium sulfate, filtered, and the filtrate was concentrated under reduced pressure. The residue was purified by preparative TLC (SiO<sub>2</sub>, petroleum ether/ethyl acetate 83%) to afford compound **99b** (180 mg, 70% yield) as a colorless oil. LCMS (ES<sup>+</sup>, Method 3) *m/z* 687.4 [M+H]<sup>+</sup>. <sup>1</sup>H NMR (400 MHz, CDCl<sub>3</sub>): δ 8.36 (s, 1H), 7.90-7.83 (m, 2H), 7.78 - 7.74 (m, 1H), 7.49 - 7.43 (m, 1H), 7.42 - 7.38 (m, 1H), 7.37 - 7.32 (m, 1H), 5.89 - 5.85 (d, *J* = 16 Hz, 1H), 5.80 - 5.60 (m, 1H), 5.40 - 5.27 (m, 1H), 4.53 - 4.45 (m, 1H), 4.43 - 4.36 (m, 1H), 4.08 - 4.01 (m, 1H), 3.93 - 3.83 (m, 1H), 1.36 - 1.33 (m, 6H), 0.93 (s, 9H), 0.76 (s, 9H), 0.12 (d, *J* = 1.6 Hz, 6H), -0.11 (s, 3H), -0.36 (s, 3H).

**9-[(2R,3R,4R,5S)-5-(1,3-Benzothiazol-2-ylsulfanylmethyl)-3,4-bis [[tert-butyl(dimethyl)silyl]oxy]tetrahydrofuran-2-yl]-N-(oxetan-3-yl)purin-6-amine (99c)**

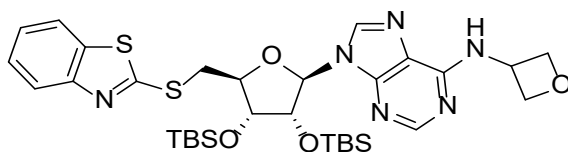

To a solution of compound **98c** (180 mg, 285  $\mu$ mol) in DMF (3 mL) was added 1,3-benzothiazol-2-ylsulfanyln sodium (162 mg, 857  $\mu$ mol) and stirred at 50 °C for 16 h. The reaction mixture was cooled to RT, quenched with water (30 mL) and extracted with EtOAc (3 x 10 mL). The combined organic layers were washed with brine (10 mL), dried over sodium sulfate, filtered, and the filtrate was concentrated under reduced pressure. The residue was purified by flash column chromatography (petroleum ether/ethyl acetate gradient 2-100%) to afford compound **99c** (150 mg, 75% yield) as a white solid. LCMS (ES<sup>+</sup>, Method 3)  $m/z$  701.2 [M+H]<sup>+</sup>. <sup>1</sup>H NMR (400 MHz, CDCl<sub>3</sub>):  $\delta$  8.36 (s, 1H), 7.93 (s, 1H), 7.85 (d,  $J$  = 8.0 Hz, 1H), 7.75 (d,  $J$  = 8.0 Hz, 1H), 7.44 - 7.40 (m, 1H), 7.33 - 7.29 (m, 1H), 6.62 (d,  $J$  = 6.8 Hz, 1H), 5.88 (d,  $J$  = 6.4 Hz, 1H), 5.49 - 5.48 (m, 1H), 5.29 (dd,  $J$  = 6.0, 4.0 Hz, 1H), 5.07 (t,  $J$  = 6.8 Hz, 1H), 4.70 (q,  $J$  = 6.0 Hz, 2H), 4.50 (td,  $J$  = 6.8, 1.6 Hz, 1H), 4.38 (dd,  $J$  = 4.4, 2.0 Hz, 1H), 4.03 (dd,  $J$  = 14.0, 6.0 Hz, 1H), 3.86 (dd,  $J$  = 14.0, 7.2 Hz, 1H), 0.92 (s, 9H), 0.75 (s, 9H), 0.12 (s, 3H), 0.11 (s, 3H), -0.12 (s, 3H), -0.38 (s, 3H).

**(2S,3S,4R,5R)-2-(1,3-Benzothiazol-2-ylsulfanylmethyl)-5-[6-(cyclopentylamino)purin-9-yl]tetrahydrofuran-3,4-diol (**20**)**

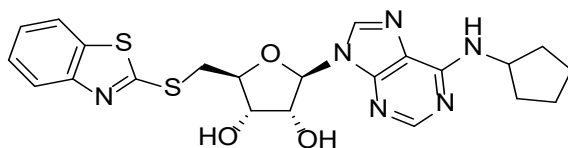

To a solution of compound **99a** (400 mg, 0.56 mmol) in MeOH (8 mL) was added potassium fluoride (325 mg, 5.61 mmol). The reaction mixture was stirred at 50 °C for 16 h, cooled to RT and concentrated under reduced pressure. The residue was purified by reverse column chromatography (0.05% NH<sub>3</sub>·H<sub>2</sub>O in water/MeCN gradient 0-25%) to afford compound **20** (166 mg, 61% yield) as a white solid. HRMS (Method 1)  $m/z$  [M+H]<sup>+</sup> calcd for C<sub>22</sub>H<sub>24</sub>N<sub>6</sub>O<sub>3</sub>S<sub>2</sub> 485.1430; found 485.1448. <sup>1</sup>H NMR (400 MHz, DMSO-*d*<sub>6</sub>):  $\delta$  8.37 (s, 1H), 8.21 (s, 1H), 8.00 (d,  $J$  = 8.0 Hz, 1H), 7.86 (d,  $J$  = 8.0 Hz, 1H), 7.73 (d,  $J$  = 6.4 Hz, 1H), 7.47 (td,  $J$  = 8.0, 0.8 Hz, 1H), 7.37 (td,  $J$  = 8.0, 0.8 Hz, 1H), 5.93 (d,  $J$  = 6.0 Hz, 1H), 5.56 (d,  $J$  = 6.0 Hz, 1H), 5.47 (d,  $J$  = 4.8 Hz, 1H), 4.87 (q,  $J$  = 5.2 Hz, 1H), 4.53 (br.s, 1H), 4.30 - 4.27 (m, 1H), 4.25 - 4.23 (m, 1H), 3.87 (dd,  $J$  = 13.6,



5.6 Hz, 1H), 3.75 (dd,  $J = 13.6, 7.6$  Hz, 1H), 2.00 - 1.92 (m, 2H), 1.78 - 1.69 (m, 2H), 1.64 - 1.54 (m, 4H).  $[\alpha]_{\text{D}}^{20} = +59.0$  ( $c=0.1$ , MeOH).

**(2S,3S,4R,5R)-2-((benzo[d]thiazol-2-ylthio)methyl)-5-(6-(isopropylamino)-9H-purin-9-yl)tetrahydrofuran-3,4-diol (**21**)**

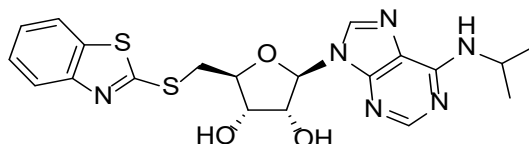

To a solution of compound **99b** (180 mg, 0.26 mmol) in MeOH (3 mL) was added potassium fluoride (123  $\mu\text{L}$ , 5.24 mmol). The reaction mixture was stirred at 60 °C for 16 h, cooled to RT and then concentrated under reduced pressure. The residue was purified by reverse column chromatography (0.1%  $\text{NH}_3 \cdot \text{H}_2\text{O}$  in water/MeCN gradient 0-100%) to afford compound **21** (29.4 mg, 24% yield) as a white solid. HRMS (Method 1)  $m/z$   $[\text{M}+\text{H}]^+$  calcd for  $\text{C}_{20}\text{H}_{22}\text{N}_6\text{O}_3\text{S}_2$  459.1278; found 459.1292.  $^1\text{H}$  NMR (400 MHz,  $\text{DMSO}-d_6$ ):  $\delta$  8.37 (s, 1H), 8.21 - 8.18 (m, 1H), 8.00 (d,  $J = 7.6$  Hz, 1H), 7.85 (d,  $J = 8$  Hz, 1H), 7.61 - 7.59 (m, 1H), 7.47 (t,  $J = 7.6$  Hz, 1H), 7.36 (t,  $J = 7.6$  Hz, 1H), 5.92 (d,  $J = 5.6$  Hz, 1H), 5.56 (d,  $J = 6$  Hz, 1H), 5.48 (d,  $J = 4.8$  Hz, 1H), 4.88 - 4.84 (m, 1H), 4.54 - 4.35 (m, 1H), 4.31 - 4.27 (m, 1H), 4.26 - 4.22 (m, 1H), 3.91 - 3.83 (m, 1H), 3.79 - 3.69 (m, 1H), 1.22 (d,  $J = 6.4$  Hz, 6H).

**(2S,3S,4R,5R)-2-(1,3-Benzothiazol-2-ylsulfanylmethyl)-5-[6-(oxetan-3-ylamino)purin-9-yl]tetrahydrofuran-3,4-diol (**22**)**

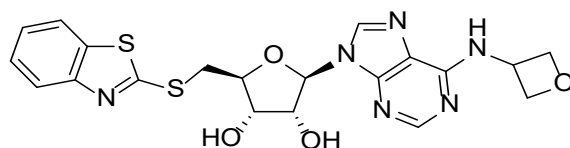

To a solution of compound **99c** (150 mg, 0.21 mmol) in methanol (4 mL) was added potassium fluoride (124 mg, 2.14 mmol). The reaction mixture was stirred at 60 °C for 16 h, cooled to RT and concentrated under reduced pressure. The residue was purified by reverse column chromatography (0.05%  $\text{NH}_3 \cdot \text{H}_2\text{O}$  in water/MeCN gradient 0-25%) to afford compound **22** (29.4 mg, 28% yield) as a white solid. HRMS (Method 1)  $m/z$   $[\text{M}+\text{H}]^+$  calcd for  $\text{C}_{20}\text{H}_{20}\text{N}_6\text{O}_4\text{S}_2$  473.1066; found 473.1092.  $^1\text{H}$  NMR (400 MHz,  $\text{DMSO}-d_6$ ):  $\delta$  8.60 (s, 1H), 8.45 (s, 1H), 8.23 (s, 1H), 8.00 (d,  $J = 7.6$  Hz, 1H), 7.85 (d,  $J = 8.0$  Hz, 1H), 7.47 (td,  $J = 8.0, 0.8$  Hz, 1H), 7.36 (td,  $J =$

8.0, 0.8 Hz, 1H), 5.94 (d,  $J$  = 5.6 Hz, 1H), 5.62 - 5.55 (m, 2H), 5.20 (br.s, 1H), 4.86 (t,  $J$  = 5.2 Hz, 1H), 4.80 (t,  $J$  = 6.8 Hz, 2H), 4.65 (t,  $J$  = 6.0 Hz, 2H), 4.29 (t,  $J$  = 4.8 Hz, 1H), 4.26 - 4.22 (m, 1H), 3.86 (dd,  $J$  = 13.6, 5.6 Hz, 1H), 3.75 (dd,  $J$  = 13.6, 7.6 Hz, 1H).

### 1.9.5 Synthesis of compounds 25 and 33

#### Scheme S10

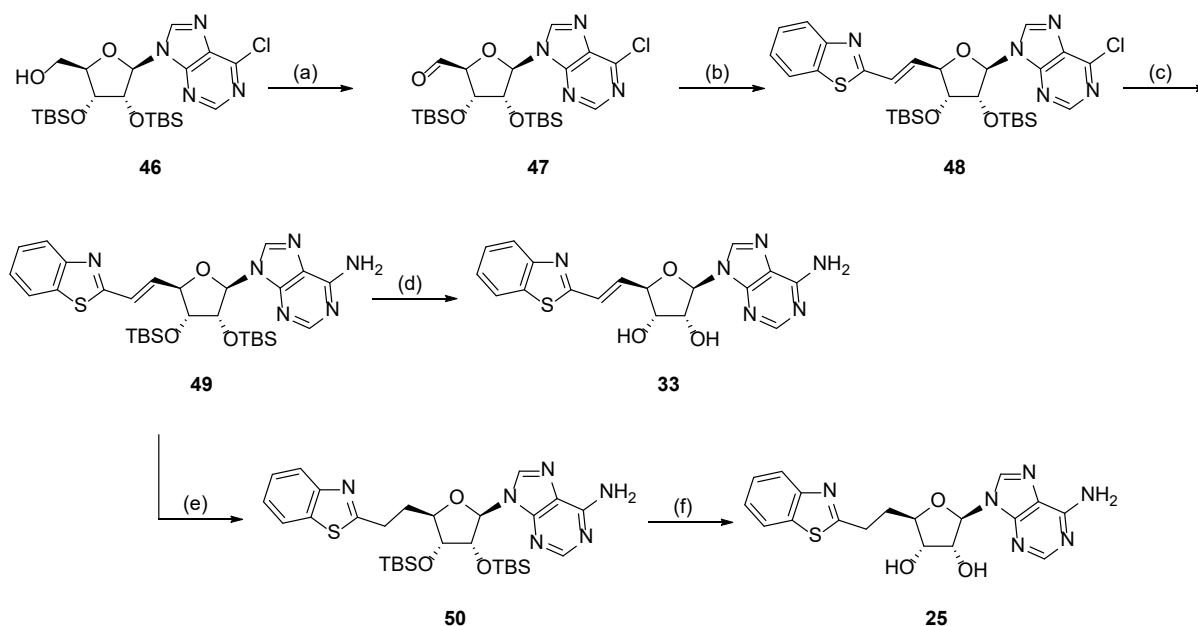

(a)  $(\text{COCl})_2$ , DMSO, TEA, DCM,  $-60^\circ\text{C}$ , 3 h, 67%; (b) (benzo[d]thiazol-2-ylmethyl)triphenylphosphonium chloride, KHMDs, THF,  $-78^\circ\text{C}$ , 2 h, 87%; (c)  $\text{NH}_3$ , THF,  $-70$  -  $80^\circ\text{C}$ , 16 h, 51%; (d) KF, DMF,  $60^\circ\text{C}$ , 16 h, 57%; (e)  $\text{H}_2$ , Pd/C, THF, RT, 16 h, 79%; (f) KF, DMF,  $60^\circ\text{C}$ , 16 h, 35%.

#### (2*S*,3*R*,4*R*,5*R*)-3,4-Bis[[*tert*-butyl(dimethyl)silyl]oxy]-5- (6-chloropurin-9-yl)tetrahydrofuran-2-carbaldehyde (47)

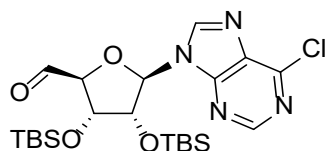

To a solution of DMSO (3.64 mL, 46.6 mmol) in DCM (30 mL) was added oxalyl chloride (3.06 mL, 34.94 mmol) at  $-60^\circ\text{C}$  under inert atmosphere and stirred for 30 min. A solution of compound **46** (3.00 g, 5.82 mmol) in DCM (10 mL) was then added and stirred for additional 30 min, followed by the addition of triethylamine (9.73 mL, 69.88 mmol). The reaction mixture

was stirred at -60 °C for 2 h and quenched with water (100 mL) at 0 °C. The aqueous layer was extracted with DCM (3 x 50 mL). The combined organic layers were dried over sodium sulfate, filtered and the filtrate was concentrated under reduced pressure. The residue was purified by flash column chromatography (petroleum ether/ethyl acetate gradient 2-17%) to afford compound **47** (2.00 g, 67% yield) as yellow oil. LCMS (ES<sup>+</sup>, Method 1) *m/z* 513.2 [M+H]<sup>+</sup>.

**[(2*R*,3*R*,4*R*,5*R*)-2-[(*E*)-2-(1,3-Benzothiazol-2-yl)vinyl]-4-[tert-butyl (dimethyl)silyl]oxy-5-(6-chloropurin-9-yl)tetrahydrofuran-3-yl]oxy-tert-butyl-dimethyl-silane (**48**)**

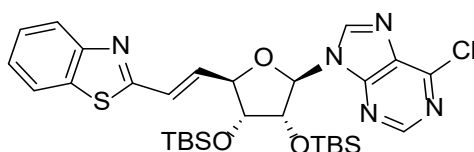

To a solution of (benzo[d]thiazol-2-ylmethyl)triphenylphosphonium chloride (86.9 mg, 194 μmol) in THF (2 mL) was added potassium bis(trimethylsilyl)amide (195 μL, 1M in THF) under inert atmosphere at -78 °C and stirred for 30 min. A solution of compound **47** (100 mg, 195 μmol) in THF (2 mL) was then added and stirred at -78 °C for 1 h. The reaction mixture was quenched with sat. aq. ammonium chloride solution (15 mL) at 0 °C and extracted with EtOAc (3 x 10 mL). The combined organic layers were washed with brine (10 mL), dried over sodium sulfate, filtered, and the filtrate was concentrated under reduced pressure. The residue was purified by preparative TLC chromatography (SiO<sub>2</sub>, petroleum ether/ethyl acetate 25%) to afford compound **48** (110 mg, 87% yield) as yellow oil. LCMS (ES<sup>+</sup>, Method 5) *m/z* 644.2 [M+H]<sup>+</sup>; <sup>1</sup>H NMR (400 MHz, CDCl<sub>3</sub>): δ 8.86 (s, 1H), 8.27 (s, 1H), 8.02 (d, *J* = 8.0 Hz, 1H), 7.90 (d, *J* = 8.0 Hz, 1H), 7.50 (t, *J* = 7.6 Hz, 1H), 7.42 (t, *J* = 7.6 Hz, 1H), 7.08 - 7.03 (m, 2H), 6.03 (d, *J* = 4.8 Hz, 1H), 5.12 (t, *J* = 4.8 Hz, 1H), 4.81 (t, *J* = 4.8 Hz, 1H), 4.36 (t, *J* = 4.0 Hz, 1H), 0.97 (s, 9H), 0.83 (s, 9H), 0.15 (s, 3H), 0.14 (s, 3H), -0.01 (s, 3H), -0.26 (s, 3H).

**9-[(2*R*,3*R*,4*R*,5*R*)-5-[(*E*)-2-(1,3-Benzothiazol-2-yl)vinyl]-3,4-bis [[tert-butyl(dimethyl)silyl]oxy]tetrahydrofuran-2-yl]purin-6-amine (**49**)**

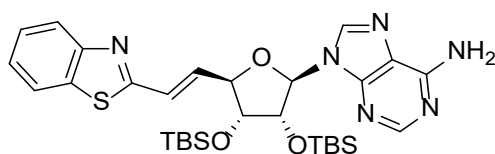

To a solution of compound **48** (30.0 mg, 0.05  $\mu$ mol) in THF (10 mL) was bubbled ammonia (39.6 mg, 2.33 mmol) at -70 °C for 5 min. The solution was then transferred to a sealed tube, stirred at RT for 16 h and then heated to 80 °C for 16 h. The reaction mixture was cooled to RT and concentrated under reduced pressure. The residue was purified by preparative TLC chromatography (SiO<sub>2</sub>, petroleum ether/ethyl acetate 25%) to afford compound **49** (15.0 mg, 51% yield) as yellow oil. LCMS (ES<sup>+</sup>, Method 3)  $m/z$  625.3 [M+H]<sup>+</sup>.

**(2*R*,3*R*,4*S*,5*R*)-2-(6-Aminopurin-9-yl)-5-[(*E*)-2-(1,3-benzothiazol-2-yl) vinyl]tetrahydrofuran-3,4-diol (**33**)**

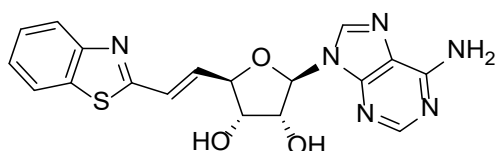

To a solution of compound **49** (15.0 mg, 24.0  $\mu$ mol) in DMF (2 mL) was added potassium fluoride (13.9 mg, 240  $\mu$ mol). The reaction mixture was stirred at 60 °C for 16 h, cooled to RT and concentrated under reduced pressure. The residue was purified by prep-HPLC (Method 8) to afford compound **33** (5.52 mg, 13.9  $\mu$ mol) as a white solid. HRMS (Method 1)  $m/z$  [M+H]<sup>+</sup> calcd for C<sub>18</sub>H<sub>16</sub>N<sub>6</sub>O<sub>3</sub>S 397.1083; found 397.1095; <sup>1</sup>H NMR (400 MHz, DMSO-*d*<sub>6</sub>):  $\delta$  8.42 (s, 1H), 8.21 (s, 1H), 8.09 (d,  $J$  = 8.0 Hz, 1H), 7.97 (d,  $J$  = 7.6 Hz, 1H), 7.51 (td,  $J$  = 6.8, 1.2 Hz, 1H), 7.44 (td,  $J$  = 8.4, 1.2 Hz, 1H), 7.33 (s, 2H), 7.13 - 6.99 (m, 2H), 6.00 (d,  $J$  = 5.2 Hz, 1H), 5.63 (d,  $J$  = 5.6 Hz, 1H), 5.58 (d,  $J$  = 5.2 Hz, 1H), 4.85 (q,  $J$  = 5.2 Hz, 1H), 4.65 (t,  $J$  = 4.8 Hz, 1H), 4.33 (q,  $J$  = 4.8 Hz, 1H).

**9-[(2*R*,3*R*,4*R*,5*R*)-5-[2-(1,3-Benzothiazol-2-yl)ethyl]-3,4-bis [[*tert*-butyl(dimethyl)silyl]oxy] tetrahydrofuran-2-yl]purin-6-amine (**50**)**

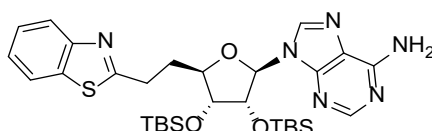

To a solution of compound **49** (100 mg, 160  $\mu$ mol) in THF (10 mL) was added Pd/C (20 mg, 160  $\mu$ mol, 10% wt.) under inert atmosphere. The suspension was degassed under reduced pressure and purged with H<sub>2</sub> several times. The mixture was stirred under H<sub>2</sub> at RT for 16 h,

and then filtered. The filtrate was concentrated under reduced pressure and the residue was purified by preparative TLC chromatography (SiO<sub>2</sub>, petroleum ether/ethyl acetate 33%) to afford compound **50** (80.0 mg, 79% yield) as yellow oil. LCMS (ES<sup>+</sup>, Method 2) *m/z* 627.4 [M+H]<sup>+</sup>; <sup>1</sup>H NMR (400 MHz, CDCl<sub>3</sub>): δ 8.35 (s, 1H), 7.98 (d, *J* = 8.0 Hz, 1H), 7.88 (s, 1H), 7.85 (d, *J* = 8.0 Hz, 1H), 7.46 (t, *J* = 8.0 Hz, 1H), 7.37 (t, *J* = 8.0 Hz, 1H), 5.86 (d, *J* = 6.0 Hz, 1H), 5.65 (s, 2H), 5.19 (dd, *J* = 6.0, 4.4 Hz, 1H), 4.22 - 4.10 (m, 2H), 3.33 - 3.29 (m, 1H), 3.23 - 3.16 (m, 1H), 2.59 - 2.55 (m, 1H), 2.34 - 2.30 (m, 1H), 0.94 (s, 9H), 0.78 (s, 9H), 0.11 (s, 6H), -0.08 (s, 3H), -0.35 (s, 3H).

**(2*R*,3*R*,4*S*,5*R*)-2-(6-Aminopurin-9-yl)-5-[2-(1,3-benzothiazol-2-yl) ethyl]tetrahydrofuran-3,4-diol (**25**)**

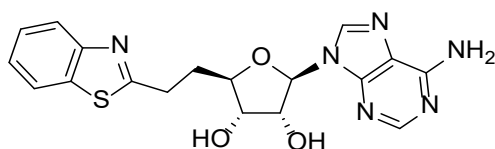

To a solution of compound **50** (80.0 mg, 0.13 mmol) in DMF (2 mL) was added potassium fluoride (74.1 mg, 1.28 mmol). The reaction mixture was stirred at 60 °C for 16 h, cooled to RT and concentrated under reduced pressure. The residue was purified by prep-HPLC (Method 9) to afford compound **25** (17.8 mg, 35% yield) as a white solid. HRMS (Method 1) *m/z* [M+H]<sup>+</sup> calcd for C<sub>18</sub>H<sub>18</sub>N<sub>6</sub>O<sub>3</sub>S 399.1239; found 399.1251; <sup>1</sup>H NMR (400 MHz, DMSO-*d*<sub>6</sub>): δ 8.36 (s, 1H), 8.15 (s, 1H), 8.04 (d, *J* = 8.0 Hz, 1H), 7.93 (d, *J* = 8.0 Hz, 1H), 7.48 (t, *J* = 7.2 Hz, 1H), 7.40 (d, *J* = 8.0 Hz, 1H), 7.29 (s, 2H), 5.88 (d, *J* = 5.2 Hz, 1H), 5.37 (s, 2H), 4.73 (t, *J* = 5.2 Hz, 1H), 4.16 (d, *J* = 4.8 Hz, 1H), 4.00 - 3.96 (m, 1H), 3.21 - 3.16 (m, 2H), 2.34 (q, *J* = 7.2 Hz, 2H). [α]<sub>D</sub><sup>20</sup> = +37.7 (c=0.1, MeOH).

### 1.9.6 Synthesis of compounds 26 and 27

#### Scheme S11

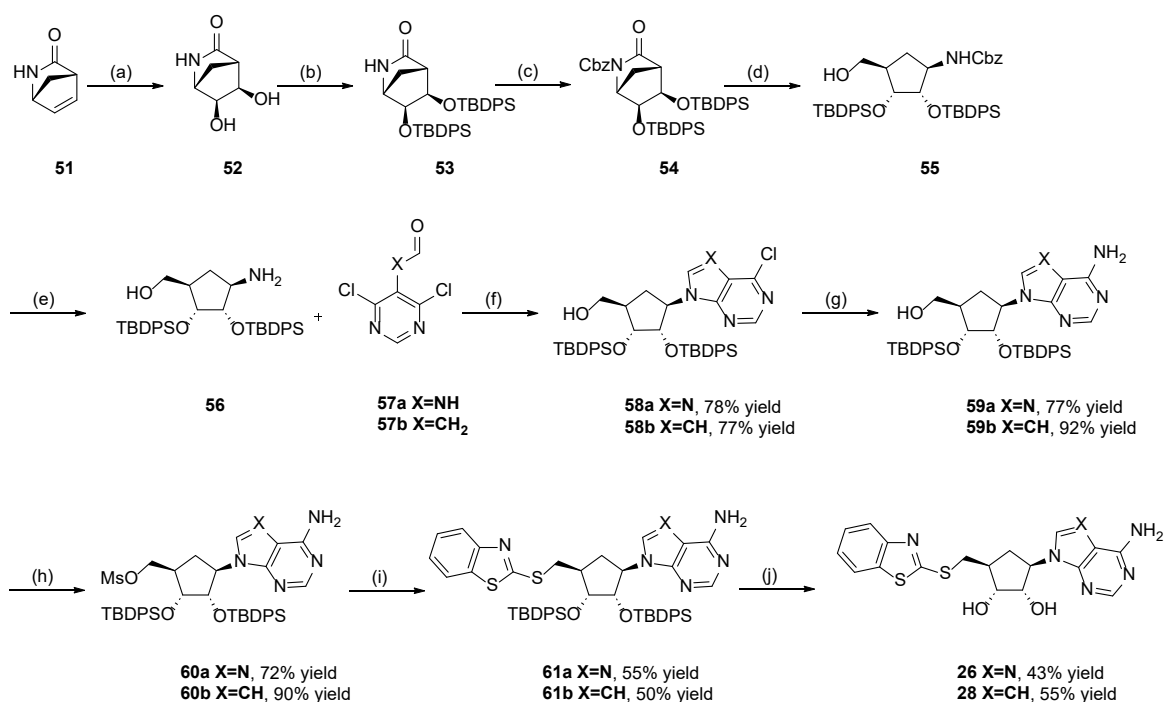

(a) K<sub>2</sub>OsO<sub>4</sub>, NMO, THF, t-BuOH, H<sub>2</sub>O, RT, 16 h, 54%; (b) TBDPSCI, 1H-imidazole, DMF, RT, 24 h, 63%; (c) CbzCl, LiHMDS, THF, -70 °C, 30 min, 92%; (d) NaBH<sub>4</sub>, THF, MeOH, 0 °C, 2 h, 97%; (e) H<sub>2</sub>, Pd/C, THF, RT, 16 h, 82%; (f) TEA, n-BuOH, 130 °C, 24 h; (g) NH<sub>3</sub>/MeOH, 90 °C, 16 h; (h) Ms<sub>2</sub>O, TEA, THF, RT, 16 h; (i) sodium benzo[d]thiazole-2-thiolate, DMF, 50 °C, 16 h; (j) KF, MeOH, 50 °C, 16 h.

### (1R,4S,5R,6S)-5,6-Dihydroxy-2-azabicyclo[2.2.1]heptan-3-one (**52**)

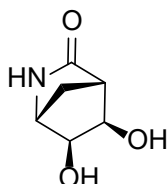

To a solution of (1R,4S)-2-azabicyclo[2.2.1]hept-5-en-3-one **51** (7.00 g, 64.2 mmol) in THF (140 mL), tert-butyl alcohol (70 mL) and water (20 mL) was added 4-methylmorpholin-oxidemonohydrate (22.5 g, 192.44 mmol) and potassium osmate(VI) dihydrate (3.55 g, 9.62 mmol). The reaction mixture was stirred at RT for 16 h and then concentrated under reduced pressure. The residue was purified by flash column chromatography (dichloromethane/methanol 0-10%) to afford compound **52** (5.00 g, 54% yield) as a black solid. LCMS (ES<sup>+</sup>, Method 4) *m/z* 144.2 [M+H]<sup>+</sup>. <sup>1</sup>H NMR (400 MHz, DMSO-*d*<sub>6</sub>): δ 7.53 (s, 1H), 5.02 (d, *J* = 4.8 Hz, 1H), 4.96 (d, *J* = 5.2 Hz, 1H), 3.77 - 3.76 (m, 1H), 3.71 - 3.70 (m, 1H), 3.43 (s, 1H), 2.25 (s, 1H), 1.89 (d, *J* = 10.0 Hz, 1H), 1.72 (d, *J* = 9.6 Hz, 1H).

**(1*R*,4*S*,5*R*,6*S*)-5,6-Bis[[tert-butyl(diphenyl)silyl]oxy]-2-azabicyclo [2.2.1]heptan-3-one (53)**

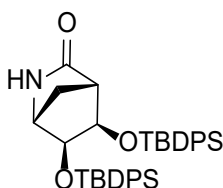

To a solution of compound **52** (4.00 g, 27.9 mmol) in DMF (20 mL) was added 1H-imidazole (19.0 g, 279 mmol) and tert-butylchlorodiphenylsilane (21.5 mL, 83.8 mmol). The reaction mixture was stirred at RT for 24 h. The reaction was then quenched with water (100 mL) and extracted with EtOAc (3 x 50 mL). The combined organic layers were washed with brine (2 x 50 mL), dried over sodium sulfate, filtered and the filtrate was concentrated under reduced pressure. The residue was purified by flash column chromatography (petroleum ether/ethyl acetate 2-50%) to afford compound **53** (11.0 g, 63% yield) as yellow oil. LCMS (ES<sup>+</sup>, Method 2) *m/z* 620.2 [M+H]<sup>+</sup>. <sup>1</sup>H NMR (400 MHz, DMSO-*d*<sub>6</sub>): δ 7.67 - 7.62 (m, 7H), 7.49 - 7.45 (m, 4H), 7.41 - 7.36 (m, 9H), 4.14 (d, *J* = 5.6 Hz, 1H), 4.06 (d, *J* = 6.0 Hz, 1H), 3.12 (s, 1H), 2.25 (d, *J* = 9.2 Hz, 1H), 2.03 (s, 1H), 1.70 (d, *J* = 9.6 Hz, 1H), 1.01 (s, 18H).

**Benzyl (1*R*,4*S*,5*R*,6*S*)-5,6-bis[[tert-butyl(diphenyl)silyl]oxy]-3-oxo-2-azabicyclo[2.2.1]heptane-2-carboxylate (54)**

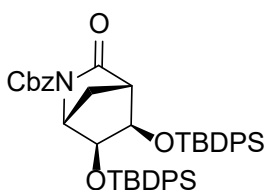

To a solution of compound **53** (8.00 g, 12.9 mmol) in THF (100 mL) under inert atmosphere at -70 °C was added dropwise lithium bis(trimethylsilyl)amide (12.9 mL, 1 M in THF) and was stirred for 10 min. Benzyl carbonochloridate (2.75 mL, 19.36 mmol) was then added and further stirred for 30 min. The reaction mixture was quenched with sat. aq. ammonium chloride solution (300 mL) and extracted with EtOAc (3 x 150 mL). The combined organic layers were washed with brine (2 x 100 mL), dried over sodium sulfate, filtered and the filtrate was concentrated under reduced pressure. The residue was purified by column chromatography

by flash column chromatography (petroleum ether/ethyl acetate 2-25%) to afford compound **54** (9.00 g, 92% yield) as colorless oil. LCMS (ES<sup>+</sup>, Method 3)  $m/z$  754.3 [M+H]<sup>+</sup>. <sup>1</sup>H NMR (400 MHz, DMSO-*d*<sub>6</sub>):  $\delta$  7.67 - 7.57 (m, 5H), 7.46 - 7.45 (m, 5H), 7.40 - 7.34 (m, 10H), 7.29 - 7.38 (m, 3H), 7.20 - 7.17 (m, 2H), 4.94 (d,  $J$  = 4.0 Hz, 2H), 4.50 (d,  $J$  = 5.6 Hz, 1H), 4.35 (d,  $J$  = 5.6 Hz, 1H), 4.09 (s, 1H), 2.32 (d,  $J$  = 10.0 Hz, 1H), 2.22 (s, 1H), 1.93 (d,  $J$  = 10.0 Hz, 1H), 0.99 (s, 9H), 0.97 (s, 9H).

**Benzyl *N*-[(1*R*,2*S*,3*R*,4*R*)-2,3-bis[[*tert*-butyl(diphenyl)silyl]oxy]-4 (hydroxymethyl) cyclopentyl]carbamate (55)**

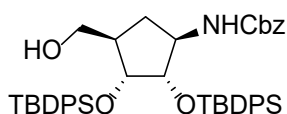

To a solution of compound **54** (9.00 g, 11.9 mmol) in THF (100 mL) and MeOH (20 mL) was added portionwise sodium borohydride (1.03 g, 27.2 mmol) at 0 °C. The resulting mixture was stirred at 0 °C for 2 h. The reaction was then quenched with water (300 mL) at 0 °C and extracted with EtOAc (3 x 100 mL). The combined organic layers were washed with brine (2 x 50 mL), dried over sodium sulfate, filtered and the filtrate was concentrated under reduced pressure. The residue was purified by flash column chromatography (petroleum ether/ethyl acetate 2-50%) to afford compound **55** (8.82 g, 97% yield) as colorless oil. LCMS (ES<sup>+</sup>, Method 3)  $m/z$  680.3 [M+H]<sup>+</sup>. <sup>1</sup>H NMR (400 MHz, DMSO-*d*<sub>6</sub>):  $\delta$  7.66 - 7.57 (m, 6H), 7.50 - 7.49 (m, 2H), 7.45 - 7.22 (m, 17H), 4.99 (d,  $J$  = 12.4 Hz, 1H), 4.92 (d,  $J$  = 12.4 Hz, 1H), 4.24 (t,  $J$  = 4.8 Hz, 1H), 4.17 (t,  $J$  = 8.8 Hz, 1H), 3.94 - 3.92 (m, 1H), 3.83 - 3.82 (m, 1H), 2.89 - 2.85 (m, 1H), 2.67 - 2.62 (m, 1H), 2.03 - 1.99 (m, 1H), 1.96 - 1.93 (m, 1H), 1.01 (s, 9H), 0.92 (s, 9H).

**[(1*R*,2*R*,3*S*,4*R*)-4-Amino-2,3-bis[[*tert*-butyl(diphenyl)silyl]oxy] cyclopentyl]methanol (56)**

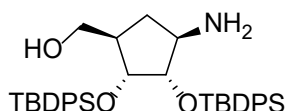

To a solution of compound **55** (8.00 g, 10.5 mmol) in THF (200 mL) was added Pd/C (10%, 100 mg, 1.06 mmol) under inert atmosphere. The suspension was degassed under reduced pressure and purged with H<sub>2</sub> several times. The mixture was stirred under H<sub>2</sub> at RT for 16 h,



then filtered. The filtrate was concentrated under reduced pressure to afford compound **56** (5.40 g, 82% yield) as a brown solid. The isolated material was used in the following step without any further purification. LCMS (ES<sup>+</sup>, Method 3)  $m/z$  624.3 [M+H]<sup>+</sup>. <sup>1</sup>H NMR (400 MHz, DMSO-*d*<sub>6</sub>):  $\delta$  7.66 - 7.58 (m, 8H), 7.45 - 7.40 (m, 8H), 7.33 - 7.24 (m, 4H), 4.00 - 3.97 (m, 1H), 3.66 - 3.63 (m, 1H), 3.62 - 3.58 (m, 1H), 3.31 (brs, 2H), 3.24 - 3.19 (m, 1H), 2.99 (dd,  $J$  = 10.4, 4.8 Hz, 1H), 2.69 - 2.64 (m, 1H), 2.05 - 2.02 (m, 1H), 1.95 - 1.89 (m, 1H), 1.01 (s, 9H), 0.98 (s, 9H).

#### ***N*-(4,6-Dichloropyrimidin-5-yl)formamide (57a)**

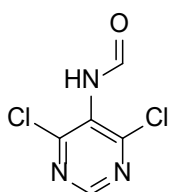

To a suspension of 4,6-dichloropyrimidin-5-amine (5.00 g, 30.5 mmol) in formic acid (62 mL) was added acetic anhydride (83.3 mL, 889 mmol) at 0 °C. The reaction mixture was warmed to RT, stirred for 1 h and then concentrated under reduced pressure to afford compound **57a** (4.00 g, 68% yield) as a white solid. The isolated material was used in the following step without any further purification. <sup>1</sup>H NMR (400 MHz, DMSO-*d*<sub>6</sub>):  $\delta$  10.62 (s, 1H), 9.41 (s, 1H), 8.36 (s, 1H).

#### **[(1*R*,2*R*,3*S*,4*R*)-2,3-Bis[[*tert*-butyl(diphenyl)silyl]oxy]-4-(6-chloropurin-9-yl)cyclopentyl] methanol (58a)**

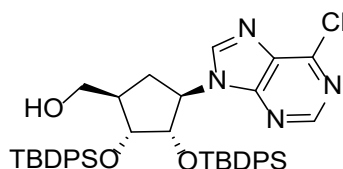

To a solution of compound **56** (5.00 g, 8.01 mmol) in *n*-butyl alcohol (75 mL) was added *N,N*-diisopropylethylamine (4.19 mL, 24.04 mmol) and compound **57a** (1.85 g, 9.62 mmol). The reaction mixture was heated at 130 °C for 24 h, cooled to RT and then concentrated under reduced pressure. The residue was purified by flash column chromatography (petroleum ether/ethyl acetate 2-50%) to afford compound **58a** (4.80 g, 78% yield) as a yellow solid. LCMS

(ES<sup>+</sup>, Method 3)  $m/z$  761.4 [M+H]<sup>+</sup>. <sup>1</sup>H NMR (400 MHz, DMSO-*d*<sub>6</sub>):  $\delta$  8.48 (s, 1H), 8.43 (s, 1H), 7.78 - 7.76 (m, 2H), 7.71 - 7.69 (m, 2H), 7.50 - 7.39 (m, 6H), 7.32 - 7.23 (m, 5H), 7.11 - 7.04 (m, 5H), 5.34 (q,  $J$  = 9.6 Hz, 1H), 4.72 (dd,  $J$  = 10.0, 3.6 Hz, 1H), 4.65 (t,  $J$  = 5.2 Hz, 1H), 4.23 (d,  $J$  = 3.6 Hz, 1H), 3.14 - 3.11 (m, 1H), 3.05 - 3.02 (m, 1H), 2.21 - 2.18 (m, 1H), 2.10 - 2.07 (m, 1H), 1.93 - 1.88 (m, 1H), 1.11 (s, 9H), 0.79 (s, 9H).

**[(1*R*,2*R*,3*S*,4*R*)-2,3-Bis[[*tert*-butyl(diphenyl)silyl]oxy]-4-(4-chloropyrrolo[2,3-*d*]pyrimidin-7-yl)cyclopentyl]methanol (**58b**)**

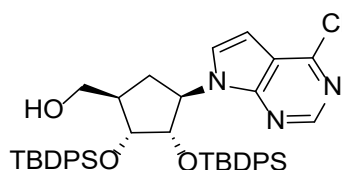

To a solution of compound **56** (0.80 g, 1.28 mmol) in *n*-butyl alcohol (20 mL) was added 2-(4,6-dichloropyrimidin-5-yl)acetaldehyde **57b** (293.88 mg, 1.54 mmol) and diisopropylethylamine (670  $\mu$ L, 3.85 mmol). The reaction mixture was heated at 130 °C for 24 h, cooled to RT and then concentrated under reduced pressure. The residue was purified by flash column chromatography (petroleum ether/ethyl acetate 2-75%) to afford compound **58b** (0.70 g, 71% yield) as yellow oil. LCMS (ES<sup>+</sup>, Method 2)  $m/z$  760.3 [M+H]<sup>+</sup>. <sup>1</sup>H NMR (400 MHz, CDCl<sub>3</sub>):  $\delta$  7.75 - 7.71 (m, 6H), 7.65 - 7.64 (m, 2H), 7.47 - 7.40 (m, 5H), 7.39 - 7.31 (m, 6H), 7.30 - 7.28 (m, 4H), 4.97 (d,  $J$  = 12.4 Hz, 1H), 4.89 (d,  $J$  = 12.4 Hz, 1H), 4.37 (d,  $J$  = 7.6 Hz, 1H), 4.04 - 4.03 (m, 1H), 4.01 - 3.98 (m, 1H), 3.00 - 2.94 (m, 2H), 2.36 - 2.28 (m, 1H), 2.04 - 2.01 (m, 1H), 1.09 (s, 9H), 1.04 (s, 9H).

**[(1*R*,2*R*,3*S*,4*R*)-4-(6-Aminopurin-9-yl)-2,3-bis[[*tert*-butyl(diphenyl) silyl]oxy]cyclopentyl]methanol (**59a**)**

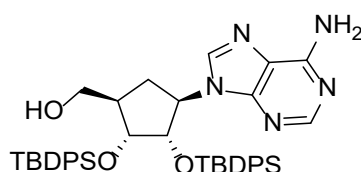

A solution of compound **58a** (4.00 g, 5.25 mmol) and ammonia (20 mL, 7 M in methanol) in a sealed tube was heated at 90 °C and stirred for 16 h. The mixture was cooled to RT and

concentrated under reduced pressure. The residue was purified by flash column chromatography (petroleum ether/ethyl acetate 2-50%) to afford compound **59a** (3.00 g, 77% yield) as a yellow solid. LCMS (ES<sup>+</sup>, Method 2) *m/z* 742.7 [M+H]<sup>+</sup>. <sup>1</sup>H NMR (400 MHz, DMSO-*d*<sub>6</sub>): δ 7.90 (s, 2H), 7.65 (t, *J* = 6.0 Hz, 4H), 7.48 - 7.34 (m, 9H), 7.28 - 7.25 (m, 1H), 7.18 (t, *J* = 7.6 Hz, 2H), 7.13 (s, 2H), 7.07 - 7.00 (m, 4H), 5.21 (q, *J* = 9.6 Hz, 1H), 4.73 (dd, *J* = 6.0, 4.8 Hz, 1H), 4.65 (dd, *J* = 9.6, 3.6 Hz, 1H), 4.10 - 4.06 (m, 1H), 3.06 - 3.02 (m, 1H), 2.91 - 2.89 (m, 1H), 2.16 - 2.13 (m, 1H), 1.99 - 1.96 (m, 1H), 1.92 - 1.89 (m, 1H), 1.04 (s, 9H), 0.77 (s, 9H).

**[(1*R*,2*R*,3*S*,4*R*)-4-(4-Aminopyrrolo[2,3-*d*]pyrimidin-7-yl)-2,3-bis [[tert-butyl(diphenyl)silyl]oxy]cyclopentyl]methanol (**59b**)**

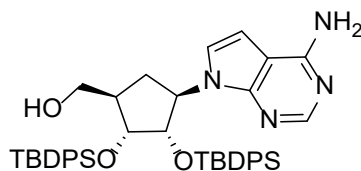

A solution of compound **58b** (100 mg, 131 μmol) and ammonia (1.14 mL, 7 M in methanol) in a sealed tube was heated at 110 °C and stirred for 16 h. The mixture was cooled to RT and concentrated under reduced pressure. The residue was purified by flash column chromatography (petroleum ether/ethyl acetate 2-50%) to afford compound **59b** (90.0 mg, 92% yield) as yellow oil. LCMS (ES<sup>+</sup>, Method 1) *m/z* 741.3 [M+H]<sup>+</sup>. <sup>1</sup>H NMR (400 MHz, DMSO-*d*<sub>6</sub>): δ 7.82 (s, 1H), 7.75 - 7.73 (m, 4H), 7.44 - 7.33 (m, 9H), 7.26 - 7.24 (m, 1H), 7.21 - 7.19 (m, 3H), 7.07 (t, *J* = 7.6 Hz, 2H), 6.99 (t, *J* = 7.6 Hz, 2H), 6.82 (d, *J* = 3.2 Hz, 1H), 6.12 (d, *J* = 3.2 Hz, 1H), 5.26 (brs, 1H), 5.02 (dd, *J* = 9.2, 3.6 Hz, 1H), 4.86 - 4.79 (m, 1H), 4.28 (d, *J* = 3.6 Hz, 1H), 3.32 (dd, *J* = 12.0, 2.4 Hz, 1H), 3.04 (dd, *J* = 11.6, 2.4 Hz, 1H), 2.39 - 2.29 (m, 1H), 2.00 - 1.97 (m, 2H), 1.16 (s, 9H), 0.97 (s, 9H).

**[(1*R*,2*R*,3*S*,4*R*)-4-(6-Aminopurin-9-yl)-2,3-bis[[tert-butyl(diphenyl) silyl]oxy]cyclopentyl] methyl methanesulfonate (**60a**)**

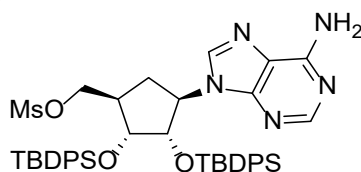

To a solution of compound **59a** (1.00 g, 1.35 mmol) and triethylamine (563 μL, 4.04 mmol) in THF (20 mL) was added a solution of methanesulfonic anhydride (281 mg, 1.62 mmol) in THF

(5 mL) at 0 °C. The reaction mixture was warmed to RT and stirred for 16 h. The reaction was quenched with water (50 mL) and then extracted with EtOAc (3 x 30 mL). The combined organic layers were washed with brine (3 x 20 mL), dried over sodium sulfate, filtered and the filtrate was concentrated under reduced pressure. The residue was purified by flash column chromatography (petroleum ether/ethyl acetate 2-50%) to afford compound **60a** (800 mg, 72% yield) as yellow oil. LCMS (ES<sup>+</sup>, Method 3) *m/z* 820.3 [M+H]<sup>+</sup>. <sup>1</sup>H NMR (400 MHz, DMSO-*d*<sub>6</sub>): δ 8.01 (s, 1H), 7.86 (s, 1H), 7.64 (d, *J* = 6.4 Hz, 2H), 7.59 (d, *J* = 6.8 Hz, 2H), 7.50 - 7.43 (m, 4H), 7.38 - 7.28 (m, 6H), 7.18 (t, *J* = 7.6 Hz, 2H), 7.13 (s, 2H), 7.09 - 7.02 (m, 4H), 5.21 (q, *J* = 9.2 Hz, 1H), 4.70 (dd, *J* = 9.2, 3.6 Hz, 1H), 4.08 (d, *J* = 3.6 Hz, 1H), 3.84 (d, *J* = 6.8 Hz, 2H), 2.93 (s, 3H), 2.28 - 2.20 (m, 2H), 2.02 - 1.99 (m, 1H), 1.02 (s, 9H), 0.78 (s, 9H).

**[(1*R*,2*R*,3*S*,4*R*)-4-(4-Aminopyrrolo[2,3-*d*]pyrimidin-7-yl)-2,3-bis [[*tert*-butyl(diphenyl)silyl]oxy]cyclopentyl]methyl methanesulfonate (60b)**

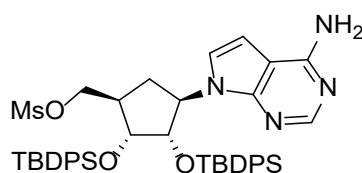

To a solution of compound **59b** (90.0 mg, 121 μmol) and triethylamine (101 μL, 728 μmol) in THF (5 mL) was added a solution of methanesulfonic anhydride (63.4 mg, 364 μmol) in THF (2 mL) at 0 °C. The reaction mixture was stirred at RT for 2 h. The reaction was quenched with water (20 mL) and then extracted with EtOAc (3 x 10 mL). The combined organic layers were washed with brine (3 x 10 mL), dried over sodium sulfate, filtered and the filtrate was concentrated under reduced pressure. The residue was purified by flash column chromatography (petroleum ether/ethyl acetate 2-50%) to afford compound **60b** (90.0 mg, 90% yield) as a white solid. <sup>1</sup>H NMR (400 MHz, CDCl<sub>3</sub>): δ 7.95 (d, *J* = 6.8 Hz, 2H), 7.87 - 7.81 (m, 4H), 7.75 - 7.70 (m, 2H), 7.65 - 7.57 (m, 4H), 7.54 - 7.49 (m, 4H), 7.43 - 7.34 (m, 5H), 7.15 (s, 1H), 6.93 (d, *J* = 3.6 Hz, 1H), 5.39 (d, *J* = 3.6 Hz, 1H), 4.20 (d, *J* = 4.8 Hz, 1H), 4.08 - 4.06 (m, 1H), 3.87 (d, *J* = 4.4 Hz, 1H), 3.63 (d, *J* = 13.2 Hz, 1H), 3.04 - 2.96 (m, 1H), 2.72 (s, 3H), 2.66 - 2.64 (m, 1H), 2.16 (dd, *J* = 13.6, 4.4 Hz, 1H), 1.65 (d, *J* = 13.2 Hz, 1H), 1.23 (s, 9H), 1.11 (s, 9H).

**9-[(1*R*,2*S*,3*R*,4*S*)-4-(1,3-Benzothiazol-2-ylsulfanylmethyl)-2,3-bis[[*tert*-butyl(diphenyl)**

### silyl]oxy]cyclopentyl]purin-6-amine (61a)

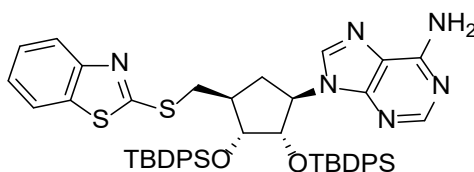

To a solution of compound **60a** (500 mg, 0.61 mmol) in DMF (5 mL) was added 1,3-benzothiazol-2-ylsulfanyl sodium (346 mg, 1.83 mmol) and heated to 50 °C for 16 h. The reaction mixture was cooled to RT, quenched with water (20 mL) and extracted with EtOAc (3 x 10 mL). The combined organic layers were washed with brine (10 mL), dried over sodium sulfate, filtered and the filtrate was concentrated under reduced pressure. The residue was purified by flash column chromatography (petroleum ether/ethyl acetate 2-100%) to afford compound **61a** (300 mg, 55% yield) as yellow oil. LCMS (ES<sup>+</sup>, Method 3) *m/z* 891.3 [M+H]<sup>+</sup>. <sup>1</sup>H NMR (400 MHz, DMSO-*d*<sub>6</sub>): δ 8.04 (s, 1H), 7.95 (d, *J* = 8.0 Hz, 1H), 7.86 (s, 1H), 7.62 (d, *J* = 8.0 Hz, 3H), 7.58 (d, *J* = 6.8 Hz, 2H), 7.46 - 7.41 (m, 2H), 7.38 - 7.32 (m, 4H), 7.31 - 7.22 (m, 6H), 7.16 - 7.01 (m, 8H), 5.20 (q, *J* = 9.6 Hz, 1H), 4.83 (dd, *J* = 9.2, 3.2 Hz, 1H), 4.14 (d, *J* = 3.6 Hz, 1H), 3.28 - 3.25 (m, 2H), 2.38 - 2.30 (m, 2H), 2.07 - 2.03 (m, 1H), 0.10 (s, 9H), 0.77 (s, 9H).

### 7-[(1R,2S,3R,4S)-4-(1,3-Benzothiazol-2-ylsulfanylmethyl)-2,3-bis(tert-butyl(diphenyl)silyl)oxy]cyclopentyl]pyrrolo[2,3-d]pyrimidin-4-amine (61b)

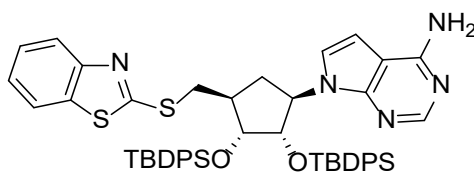

To a solution of compound **60b** (90.0 mg, 110 μmol) in DMF (2 mL) was added 1,3-benzothiazol-2-ylsulfanyl sodium (62.4 mg, 329 μmol) and heated at 50 °C for 16 h. The reaction mixture was cooled to RT, quenched with water (15 mL) and extracted with EtOAc (3 x 10 mL). The combined organic layers were washed with brine (3 x 10 mL), dried over sodium sulfate, filtered and the filtrate was concentrated under reduced pressure. The residue was purified by preparative TLC (SiO<sub>2</sub>, petroleum ether/ethyl acetate 50%) to afford compound **61b** (30.0 mg, 30% yield) as yellow oil. LCMS (ES<sup>+</sup>, Method 1) *m/z* 890.2 [M+H]<sup>+</sup>.

**(1*R*,2*S*,3*R*,5*S*)-3-(6-aminopurin-9-yl)-5-(1,3-benzothiazol-2-ylsulfanylmethyl) cyclopentane-1,2-diol (26)**

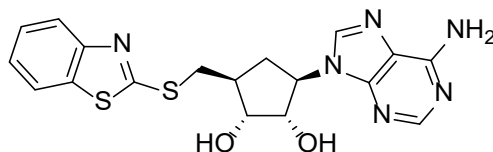

To a solution of compound **61a** (300 mg, 0.34 mmol) in MeOH (10 mL) was added potassium fluoride (196 mg, 3.37 mmol). The reaction mixture was stirred at 50 °C for 16 h, cooled to RT and then concentrated under reduced pressure. The residue was purified by reverse column chromatography (0.05% NH<sub>3</sub>·H<sub>2</sub>O in water/MeCN gradient 0-5%) to afford compound **26** (62.7 mg, 43% yield) as a white solid. HRMS (Method 1) *m/z* [M+H]<sup>+</sup> calcd for C<sub>18</sub>H<sub>18</sub>N<sub>6</sub>O<sub>2</sub>S<sub>2</sub> 415.1011; found 415.1022. <sup>1</sup>H NMR (400 MHz, DMSO-*d*<sub>6</sub>): δ 8.22 (s, 1H), 8.11 (s, 1H), 8.01 (d, *J* = 8.0 Hz, 1H), 7.86 (d, *J* = 8.0 Hz, 1H), 7.47 (td, *J* = 8.0, 0.8 Hz, 1H), 7.37 (td, *J* = 8.4, 0.8 Hz, 1H), 7.19 (s, 2H), 5.07 (d, *J* = 6.0 Hz, 1H), 4.95 (d, *J* = 4.4 Hz, 1H), 4.72 - 4.67 (m, 1H), 4.48 - 4.43 (m, 1H), 3.96 - 3.92 (m, 1H), 3.69 (dd, *J* = 12.8, 6.4 Hz, 1H), 3.54 (dd, *J* = 13.2, 8.0 Hz, 1H), 2.43 - 2.37 (m, 2H), 1.92 - 1.87 (m, 1H). <sup>13</sup>C NMR (126 MHz, DMSO-*d*<sub>6</sub>) δ 166.63, 156.02, 152.73, 152.10, 149.58, 140.23, 134.57, 126.38, 124.46, 121.80, 121.11, 119.35, 74.36, 73.97, 59.46, 42.50, 36.66, 31.91. [α]<sub>D</sub><sup>20</sup> = +21.0 (c=0.1, MeOH).

**(1*R*,2*S*,3*R*,5*S*)-3-(4-Aminopyrrolo[2,3-*d*]pyrimidin-7-yl)-5-(1,3-benzothiazol-2-ylsulfanylmethyl)cyclopentane-1,2-diol (28)**

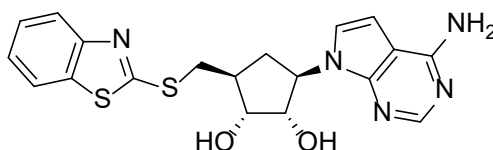

To a solution of compound **61b** (30.0 mg, 33.7 μmol) in MeOH (2 mL) was added p-toluenesulfonic acid (29.0 mg, 168 μmol). The reaction mixture was heated to 70 °C for 16 h, cooled to RT and concentrated under reduced pressure. The residue was purified by reverse column chromatography (0.05% NH<sub>3</sub>·H<sub>2</sub>O in water/MeCN gradient 0-5%) to afford compound **28** (8.16 mg, 55% yield) as a light yellow solid. HRMS (Method 1) *m/z* [M+H]<sup>+</sup> calcd for C<sub>19</sub>H<sub>19</sub>N<sub>5</sub>O<sub>2</sub>S<sub>2</sub> 414.1058; found 414.1080. <sup>1</sup>H NMR (400 MHz, DMSO-*d*<sub>6</sub>): δ 8.02 - 8.00 (m, 2H), 7.86 (d, *J* = 8.0 Hz, 1H), 7.47 (t, *J* = 8.0 Hz, 1H), 7.36 (t, *J* = 7.6 Hz, 1H), 7.26 (d, *J* = 3.6 Hz, 1H), 6.91 (s, 2H), 6.54 (d, *J* = 3.2 Hz, 1H), 4.96 (s, 1H), 4.85 - 4.83 (m, 1H), 4.28 (t, *J* = 7.6 Hz,

1H), 3.91 (t,  $J = 4.8$  Hz, 1H), 3.67 (dd,  $J = 12.8, 6.4$  Hz, 1H), 3.56 - 3.47 (m, 1H), 2.35 - 2.30 (m, 2H), 1.73 - 1.67 (m, 1H).

## 1.9.7 Synthesis of compound 27

### Scheme S12

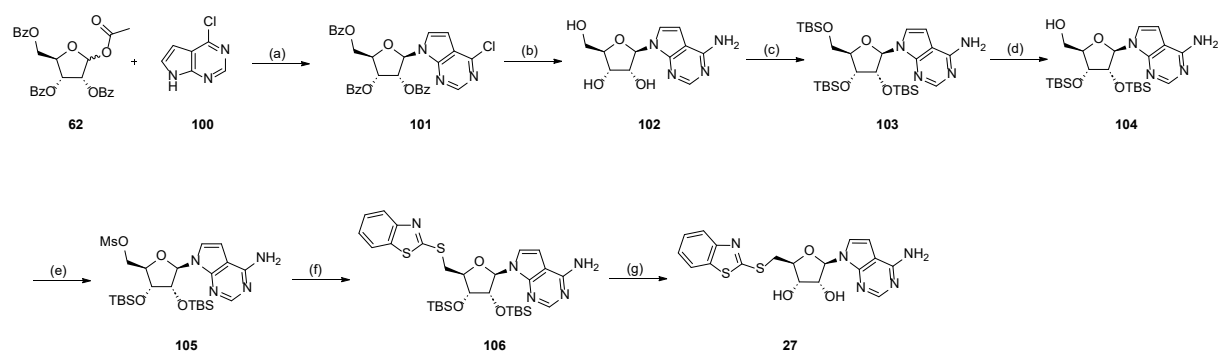

(a) BSA, TMSOTf, MeCN, 25-80 °C, 1.5 h, 27%; (b)  $\text{NH}_3/\text{MeOH}$ , 90 °C, 32 h, 75%; (c) TBS-Cl, 1H-imidazole, DMF, RT, 16 h, 74%; (d)  $\text{Cl}_3\text{CCO}_2\text{H}$ , THF/ $\text{H}_2\text{O}$ , 0 °C, 16 h, 58%; (e)  $\text{Ms}_2\text{O}$ , TEA, THF, RT, 16 h, 73%; (f) sodium benzo[d]thiazole-2-thiolate, DMF, 50 °C, 16 h, 78%; (g) KF, MeOH, 50 °C, 16 h, 19%

### [(2R,3R,4R,5R)-3,4-Dibenzoyloxy-5-(4-chloropyrrolo[2,3-d]pyrimidin-7-yl)tetrahydrofuran-2-yl]methyl benzoate (101)

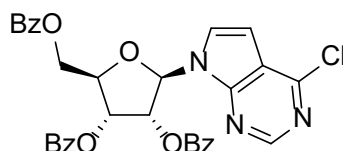

*N,O*-Bis(trimethylsilyl)acetamide (8.05 mL, 32.6 mmol) was added to a stirred suspension of 4-chloro-7H-pyrrolo[2,3-d]pyrimidine **100** (5.00 g, 32.6 mmol) MeCN (100 mL) at RT. After stirring for 10 min, [(2R,3R, 4R)-5-acetoxy-3, 4-dibenzoyloxy-tetrahydrofuran-2-yl] methyl benzoate **62** (18.1 g, 35.8 mmol) was added, followed by trimethylsilyl trifluoromethanesulfonate (5.88 mL, 32.56 mmol). The reaction mixture was stirred at RT for 15 min before being heated at 80 °C for 1 h. The reaction mixture was cooled to RT and diluted with EtOAc (75 mL). The organic phase was sequentially washed with sat. aq. sodium bicarbonate solution (2 x 200 mL) and brine (50 mL), dried over sodium sulfate, filtered and the filtrate was concentrated under reduced pressure. The residue was purified by flash column chromatography (petroleum ether/ethyl acetate gradient 0-50%) to afford compound **101** (5.60 g, 27% yield) as yellow oil. LCMS ( $\text{ES}^+$ , Method 1)  $m/z$  598.1  $[\text{M}+\text{H}]^+$ .  $^1\text{H}$  NMR (400

MHz, CDCl<sub>3</sub>):  $\delta$  8.61 (s, 1H), 8.23 - 8.09 (m, 2H), 8.06 - 7.98 (m, 2H), 7.96 - 7.89 (m, 2H), 7.64 - 7.53 (m, 3H), 7.51 - 7.46 (m, 2H), 7.45 - 7.34 (m, 5H), 6.69 (d,  $J$  = 5.6 Hz, 1H), 6.64 (d,  $J$  = 3.6 Hz, 1H), 6.25 (t,  $J$  = 5.6 Hz, 1H), 6.20 - 6.13 (m, 1H), 4.90 (dd,  $J$  = 3.2, 12.0 Hz, 1H), 4.83 - 4.77 (m, 1H), 4.69 (dd,  $J$  = 4.0, 12.0 Hz, 1H).

**(2*R*,3*R*,4*S*,5*R*)-2-(4-Aminopyrrolo[2,3-*d*]pyrimidin-7-yl)-5-(hydroxymethyl)tetrahydrofuran-3,4-diol (102)**

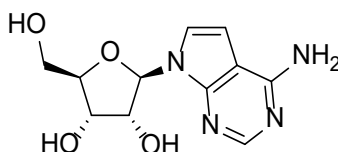

A solution of compound **101** (3.00 g, 5.02 mmol) in ammonia (36.0 mL, 7 M in MeOH) in a sealed tube was heated at 90 °C for 32 h. The mixture was cooled to RT and concentrated under reduced pressure. The residue was purified by reverse column chromatography (0.05% NH<sub>3</sub>·H<sub>2</sub>O in water/MeCN gradient 0-5%) to afford compound **102** (1.00 g, 75% yield) as a yellow solid. LCMS (ES<sup>+</sup>, Method 5)  $m/z$  267.2 [M+H]<sup>+</sup>.

**7-[(2*R*,3*R*,4*R*,5*R*)-3,4-Bis[[tert-butyl(dimethyl)silyl]oxy]-5-[[tert-butyl(dimethyl)silyl]oxymethyl]tetrahydrofuran-2-yl]pyrrolo[2,3-*d*]pyrimidin-4-amine (103)**

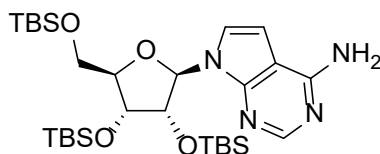

To a solution of compound **102** (1.00 g, 3.76 mmol) and imidazole (2.56 g, 37.5 mmol) in DMF (10 mL) at 0 °C was added tert-butyldimethylchlorosilane (2.83 g, 18.8 mmol). The mixture was warmed to RT and stirred for 16 h. The reaction was quenched with water (50 mL) and extracted with EtOAc (3 x 20 mL). The combined organic layers were washed with brine (3 x 20 mL), dried over sodium sulfate, filtered, and the filtrate was concentrated under reduced pressure. The residue was purified by flash column chromatography (petroleum ether/ethyl acetate gradient 0-50%) to afford compound **103** (1.70 g, 74% yield) as a white solid. LCMS (ES<sup>+</sup>, Method 2)  $m/z$  609.6 [M+H]<sup>+</sup>. <sup>1</sup>H NMR (400 MHz, CDCl<sub>3</sub>):  $\delta$  8.31 (s, 1H), 7.36 (d,  $J$  = 3.6



Hz, 1H), 6.37 (d,  $J = 3.6$  Hz, 1H), 6.25 (d,  $J = 5.6$  Hz, 1H), 5.16 (s, 2H), 4.54 (dd,  $J = 5.6, 4.4$  Hz, 1H), 4.29 (dd,  $J = 4.4, 3.2$  Hz, 1H), 4.10 - 4.09 (m, 1H), 3.97 (dd,  $J = 11.2, 4.0$  Hz, 1H), 3.78 (dd,  $J = 11.2, 2.8$  Hz, 1H), 0.97 (s, 9H), 0.94 (s, 9H), 0.78 (s, 9H), 0.13 (d,  $J = 1.6$  Hz, 6H), 0.11 (s, 6H), -0.09 (s, 3H), -0.28 (s, 3H).

**[(2*R*,3*R*,4*R*,5*R*)-5-(4-Aminopyrrolo[2,3-*d*]pyrimidin-7-yl)-3,4-bis[[*tert*-butyl(dimethyl)silyl]oxy]tetrahydrofuran-2-yl)methanol (104)**

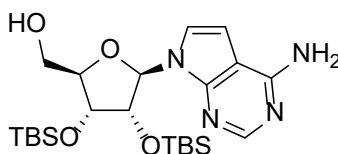

To a solution of compound **103** (1.70 g, 2.79 mmol) in THF (60 mL) at 0 °C was added dropwise a solution of trichloroacetic acid (4.56 g, 27.9 mmol) in water (20 mL). The resulting mixture was stirred at 0 °C for 16 h and then quenched with sat. aq. sodium bicarbonate (100 mL). The aqueous layer was extracted with EtOAc (3 x 50 mL). The combined organic layers were washed with brine (2 x 50 mL), dried over sodium sulfate, filtered, and the filtrate was concentrated under reduced pressure. The residue was purified by flash column chromatography (petroleum ether/ethyl acetate gradient 2-100%) to afford compound **104** (800 mg, 58% yield) as a white solid. LCMS (ES<sup>+</sup>, Method 2)  $m/z$  495.2 [M+H]<sup>+</sup>. <sup>1</sup>H NMR (400 MHz, DMSO-*d*<sub>6</sub>):  $\delta$  8.03(s, 1H), 7.37 (d,  $J = 3.6$  Hz, 1H), 7.05 (s, 1H), 6.58 (d,  $J = 3.6$  Hz, 1H), 5.97 (d,  $J = 3.6$  Hz, 1H), 5.69 - 5.67 (m, 1H), 4.74 (dd,  $J = 7.2, 4.4$  Hz, 1H), 4.24 (d,  $J = 4.8$  Hz, 1H), 3.92 - 3.91 (m, 1H), 3.68 - 3.64 (m, 1H), 3.58 - 3.53 (m, 1H).

**[(2*R*,3*R*,4*R*,5*R*)-5-(4-Amino-7H-pyrrolo[2,3-*d*]pyrimidin-7-yl)-3,4-bis((*tert*butyldimethylsilyl)oxy)tetrahydrofuran-2-yl)methyl methanesulfonate (105)**

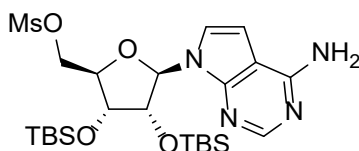

To a solution of compound **104** (0.20 g, 404  $\mu$ mol) and triethylamine (169  $\mu$ L, 1.21 mmol) in THF (5 mL) at 0 °C was added dropwise a solution of methanesulfonyl anhydride (84.5 mg,

0.49 mmol) in THF (1 mL). The resulting mixture was warmed up to RT and stirred for 16 h. The reaction was quenched with water (20 mL) and extracted with EtOAc (3 x 10 mL). The combined organic layers were washed with brine (2 x 10 mL), dried over sodium sulfate, filtered, and the filtrate concentrated under reduced pressure. The residue was purified by flash column chromatography (petroleum ether/ethyl acetate gradient 2-100%) to afford compound **105** (170 mg, 73% yield) as a yellow oil. LCMS (ES<sup>+</sup>, Method 2) *m/z* 573.1 [M+H]<sup>+</sup>. <sup>1</sup>H NMR (400 MHz, DMSO-*d*<sub>6</sub>): δ 8.07 (s, 1H), 7.34 (d, *J* = 3.6 Hz, 1H), 7.03 (s, 1H), 6.63 (d, *J* = 3.6 Hz, 1H), 6.13 (d, *J* = 7.2 Hz, 1H), 4.74 (dd, *J* = 7.2, 4.8 Hz, 1H), 4.51 - 4.48 (m, 2H), 4.31 (dd, *J* = 4.4, 1.2 Hz, 1H), 4.13 (t, *J* = 5.2 Hz, 1H), 3.21 (s, 3H), 0.94 (s, 9H), 0.69 (s, 9H), 0.15 (s, 3H), 0.13 (s, 3H), -0.11 (s, 3H), -0.38 (s, 3H).

**7-[(2*R*,3*R*,4*R*,5*S*)-5-(1,3-Benzothiazol-2-ylsulfanylmethyl)-3,4-bis [[*tert*-butyl(dimethyl)silyl]oxy]tetrahydrofuran-2-yl]pyrrolo[2,3-*d*]pyrimidin-4-amine (106)**

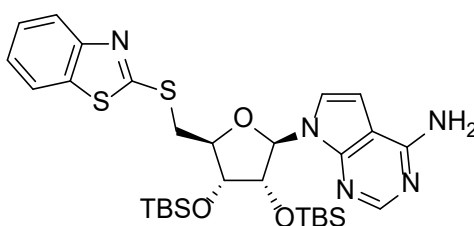

To a solution of compound **105** (170 mg, 297 μmol, 1.0) in DMF (2 mL) was added 1,3-benzothiazol-2-ylsulfanylsodium (84.2 mg, 445 μmol) and stirred at 50 °C for 16 h. The reaction was cooled to RT, quenched with water (20 mL) and extracted with EtOAc (3 x 10 mL). The combined organic layers were washed with brine (3 x 10 mL), dried over sodium sulfate, filtered, and the filtrate was concentrated under reduced pressure. The residue was purified by flash column chromatography (petroleum ether/ethyl acetate gradient 2-100%) to afford compound **106** (150 mg, 78% yield) as yellow oil. LCMS (ES<sup>+</sup>, Method 3) *m/z* 644.2 [M+H]<sup>+</sup>. <sup>1</sup>H NMR (400 MHz, DMSO-*d*<sub>6</sub>): δ 8.06 (s, 1H), 8.01 (d, *J* = 8.0 Hz, 1H), 7.82 (d, *J* = 8.0 Hz, 1H), 7.48 (td, *J* = 8.0, 1.2 Hz, 1H), 7.41 - 7.39 (m, 1H), 7.37 - 7.35 (m, 1H), 7.01 (s, 2H), 6.62 (d, *J* = 3.6 Hz, 1H), 6.08 (d, *J* = 7.6 Hz, 1H), 4.95 (q, *J* = 4.4 Hz, 1H), 4.37 (d, *J* = 4.4 Hz, 1H), 4.27 (t, *J* = 6.8 Hz, 1H), 3.94 (dd, *J* = 14.0, 7.2 Hz, 1H), 3.76 (dd, *J* = 14.0, 6.8 Hz, 1H), 0.88 (s, 9H), 0.65 (s, 9H), 0.08 (d, *J* = 1.2 Hz, 6H), -0.16 (s, 3H), -0.44 (s, 3H).

**(2R,3R,4S,5S)-2-(4-Aminopyrrolo[2,3-d]pyrimidin-7-yl)-5-(1,3-benzothiazol-2-ylsulfanylmethyl)tetrahydrofuran-3,4-diol (27)**

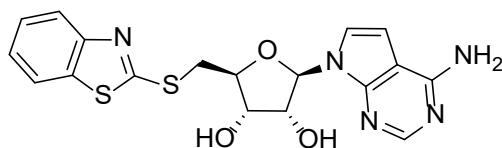

To a solution of compound **106** (150 mg, 0.23 mmol) in methanol (3 mL) was added potassium fluoride (135 mg, 2.33 mmol). The resulting mixture was stirred at 50 °C for 16 h, cooled to RT and concentrated under reduced pressure. The residue was purified by reverse column chromatography (0.05% NH<sub>3</sub>·H<sub>2</sub>O in water/MeCN gradient 0-5%) and then triturated from acetonitrile and methanol (1:1, 4 mL) to afford compound **27** (19.2 mg, 19% yield) as a white solid. HRMS (Method 1) *m/z* [M+H]<sup>+</sup> calcd for C<sub>18</sub>H<sub>17</sub>N<sub>5</sub>O<sub>3</sub>S<sub>2</sub> 416.0851; found 416.0852. <sup>1</sup>H NMR (400 MHz, DMSO-*d*<sub>6</sub>): δ 8.06 (s, 1H), 8.00 (d, *J* = 7.2 Hz, 1H), 7.86 (d, *J* = 7.6 Hz, 1H), 7.47 (td, *J* = 8.0, 1.2 Hz, 1H), 7.39 - 7.34 (m, 2H), 7.02 (s, 2H), 6.61 (d, *J* = 3.6 Hz, 1H), 6.08 (d, *J* = 6.0 Hz, 1H), 5.42 (s, 2H), 4.57 (t, *J* = 5.6 Hz, 1H), 4.19 - 4.17 (m, 2H), 3.82 (dd, *J* = 13.6, 5.6 Hz, 1H), 3.69 (dd, *J* = 13.6, 7.2 Hz, 1H). SFC (Method 3) de% = 100%.

### 1.9.8 Synthesis of compound 29

#### Scheme S13

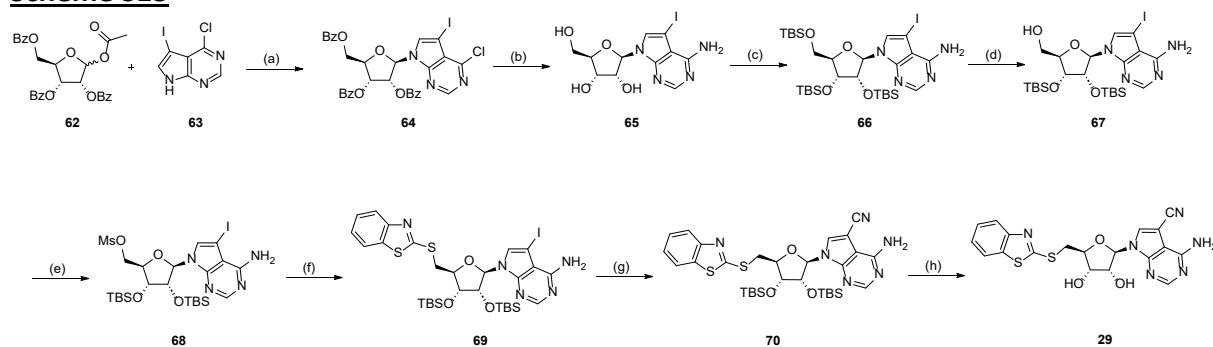

(a) BSA, TMSOTf, MeCN, 25-80 °C, 1.5 h, 49%; (b) NH<sub>3</sub>/MeOH, 90 °C, 16 h, 98%; (c) TBS-Cl, 1H-imidazole, DMF, RT, 16 h, 30%; (d) Cl<sub>3</sub>CCO<sub>2</sub>H, THF/H<sub>2</sub>O, 0 °C, 1 h, 84%; (e) Ms<sub>2</sub>O, TEA, THF, 0 °C to RT, 2 h, 89%; (f) sodium benzo[d]thiazole-2-thiolate, DMF, 50 °C, 12 h, 95%; (g) Pd(PPh<sub>3</sub>)<sub>4</sub>, Zn(CN)<sub>2</sub>, DMF, 90 °C, 16 h, 92%; (h) KF, MeOH, 60 °C, 16 h, 12%.

**(2R,3R,4R,5R)-2-((Benzoyloxy)methyl)-5-(4-chloro-5-iodo-7H-pyrrolo[2,3-d]pyrimidin-7-yl)tetrahydrofuran-3,4-diyl dibenzoate (64)**

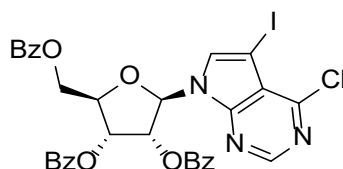

N,O-Bis(trimethylsilyl)acetamide (8.84 mL, 35.7 mmol) was added to a stirred suspension of 4-chloro-5-iodo-7H-pyrrolo[2,3-d]pyrimidine **63** (10.0 g, 35.8 mmol) in MeCN (200 mL). After stirring at RT for 10 min, [(2R,3R,4R)-5-acetoxy-3,4-dibenzoyloxy-tetrahydrofuran-2-yl]methyl benzoate **62** (19.9 g, 39.4 mmol) was added, followed by the addition of trimethylsilyl trifluoromethanesulfonate (6.47 mL, 35.78 mmol). The reaction mixture was stirred at RT for 15 min before being warmed up at 80 °C for 1 h. The reaction mixture was cooled to RT and diluted with EtOAc (75 mL). The organic phase was sequentially washed with sat. aq. sodium bicarbonate (2 x 200 mL) and brine (50 mL), dried over sodium sulfate, filtered, and the filtrate was concentrated under reduced pressure. The isolated material was recrystallized in MeCN to afford compound **64** (12.7 g, 49% yield) as a white solid. <sup>1</sup>H NMR (400 MHz, CDCl<sub>3</sub>): δ 8.58 (s, 1H), 8.12 (d, *J* = 7.6 Hz, 2H), 8.00 (d, *J* = 7.6 Hz, 2H), 7.92 (d, *J* = 6.8 Hz, 2H), 7.56 - 7.51 (m, 6H), 7.42 - 7.37 (m, 4H), 6.67 (d, *J* = 5.6 Hz, 1H), 6.17 - 6.14 (m, 1H), 6.12 - 6.10 (m, 1H), 4.91 (dd, *J* = 12.4, 2.8 Hz, 1H), 4.81 (d, *J* = 4.0 Hz, 1H), 4.69 (dd, *J* = 12.0, 3.6 Hz, 1H)

**(2R,3R,4S,5R)-2-(4-Amino-5-iodo-7H-pyrrolo[2,3-d]pyrimidin-7-yl)-5-(hydroxymethyl) tetrahydrofuran-3,4-diol (**65**)**

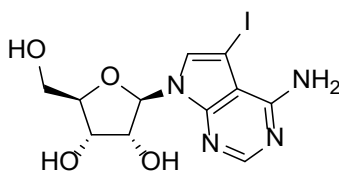

Compound **64** (3 g, 4.14 mmol) was added to a sealed tube containing ammonia (59.2 mL, 7 in MeOH) and stirred at 90 °C for 16 h. The reaction mixture was cooled to RT and concentrated under reduced pressure. The residue was triturated in EtOAc (100 mL) under ultrasonic wave for 10 min and filtered to afford compound **65** (1.60 g, 98% yield) as a black solid. The isolated material was used in the following step without any further purification. <sup>1</sup>H NMR (400 MHz, DMSO-*d*<sub>6</sub>): δ 8.09 (s, 1H), 7.67 (s, 1H), 6.67 (brs, 2H), 6.02 (d, *J* = 6.4 Hz, 1H), 5.31 (brs, 1H), 5.16 - 5.12 (m, 2H), 4.35 (s, 1H), 4.06 (d, *J* = 4.4 Hz, 1H), 3.87 - 3.85 (m, 1H), 3.62 - 3.59 (m, 1H), 3.53 - 3.50 (m, 1H).

**7-((2R,3R,4R,5R)-3,4-Bis((tert-butyldimethylsilyl)oxy)-5-(((tert-butyldimethylsilyl)oxy)methyl)tetrahydrofuran-2-yl)-5-iodo-7H-pyrrolo[2,3-d]pyrimidin-4-amine (66)**

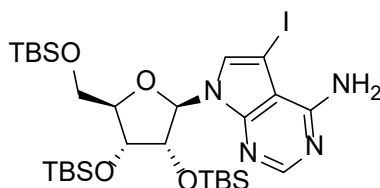

To a solution of compound **65** (2.50 g, 6.38 mmol) and 1H-imidazole (5.25 g, 77.2 mmol) in DMF (25 mL) at RT, was added *t*-butyl-chloro-dimethyl-silane (5.82 g, 38.6 mmol) and stirred for 16 h. The reaction mixture was diluted in hexane (50 mL) and washed with brine (250 mL). The separated aqueous layer was re-extracted with hexane (2 x 100 mL) and the combined organic layers dried over sodium sulfate, filtered, and the filtrate was concentrated under reduced pressure. The residue was purified by flash column chromatography (petroleum ether/ethyl acetate gradient 0-15%) to afford compound **66** (1.40 g, 30% yield) as a black solid. LCMS (ES<sup>+</sup>, Method 3) *m/z* 735.3 [M+H]<sup>+</sup>; <sup>1</sup>H NMR (400 MHz, CDCl<sub>3</sub>): δ 8.26 (s, 1H), 7.54 (s, 1H), 6.26 (d, *J* = 5.2 Hz, 1H), 5.72 (brs, 2H), 4.40 (t, *J* = 4.8 Hz, 1H), 4.22 - 4.12 (m, 1H), 4.10 - 4.08 (m, 1H), 3.98 - 3.97 (m, 1H), 3.94 - 3.79 (m, 1H), 1.00 (s, 9H), 0.92 (s, 9H), 0.78 (s, 9H), 0.18 (d, *J* = 5.6 Hz, 6H), 0.11 (s, 6H), -0.071 (s, 3H), -0.27 (s, 3H).

**((2R,3R,4R,5R)-5-(4-amino-5-iodo-7H-pyrrolo[2,3-d]pyrimidin-7-yl)-3,4-bis((tert-butyldimethylsilyl)oxy)tetrahydrofuran-2-yl)methanol (67)**

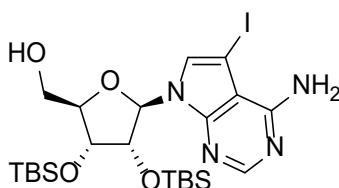

To a solution of compound **66** (1.40 g, 1.90 mmol) in THF (45 mL) cooled to 0 °C, was added dropwise a solution of 2,2,2-trichloroacetic acid (3.11 g, 19.1 mmol) in H<sub>2</sub>O (15 mL). Upon completion of the addition, the reaction mixture was stirred for 1 h at 0 °C. The reaction mixture was neutralized using sodium carbonate, diluted with water (100 mL) and extracted with EtOAc (3 x 50 mL). The combined organic layers were dried over magnesium sulphate,

filtered, and the filtrate was concentrated under reduced pressure. The residue was purified by flash column chromatography (petroleum ether/ethyl acetate gradient 10-50%) to afford compound **67** (1.00 g, 84% yield) as a black solid. LCMS (ES<sup>+</sup>, Method 3) *m/z* 621.3 [M+H]<sup>+</sup>; <sup>1</sup>H NMR (400 MHz, CDCl<sub>3</sub>): δ 8.2 (s, 1H), 7.14 (s, 1H), 6.57 - 6.54 (m, 1H), 5.89 (brs, 2H), 5.62 (d, *J* = 8.0 Hz, 1H), 5.04 - 5.38 (m, 1H), 4.30 (d, *J* = 4.4 Hz, 1H), 3.92 (d, *J* = 13.4 Hz, 1H), 3.72 - 3.69 (m, 1H), 0.95 (s, 9H), 0.76 (s, 9H), 0.12 (d, *J* = 5.2 Hz, 6H), -0.14 (s, 3H), -0.59 (s, 3H).

**((2R,3R,4R,5R)-5-(4-Amino-5-iodo-7H-pyrrolo[2,3-d]pyrimidin-7-yl)-3,4-bis((tert-butyldimethylsilyl)oxy)tetrahydrofuran-2-yl)methyl methanesulfonate (68)**

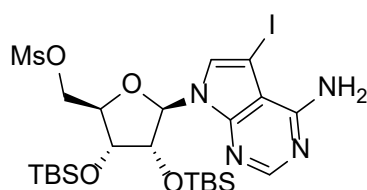

To a solution of compound **67** (1.00 g, 1.61 mmol) and triethylamine (978 mg, 9.67 mmol) in THF (10 mL) was added dropwise methanesulfonyl anhydride (842 mg, 4.83 mmol) at 0 °C under inert atmosphere. The mixture was warmed to RT and stirred for 2 h. The reaction was quenched with water (20 mL) and extracted with EtOAc (3 x 20 mL). The combined organic layers were washed with brine (20 mL), dried over sodium sulfate, filtered, and the filtrate was concentrated under reduced pressure. The residue was purified by flash column chromatography (petroleum ether/ethyl acetate gradient 10-50%) to afford compound **68** (1.00 g, 89% yield) as yellow oil. LCMS (ES<sup>+</sup>, Method 3) *m/z* 699.2 [M+H]<sup>+</sup>; <sup>1</sup>H NMR (400 MHz, MeOH-*d*<sub>4</sub>): δ 8.27 (s, 1H), 7.28 - 7.27 (m, 1H), 6.03 (d, *J* = 4.4 Hz, 1H), 5.76 (s, 1H), 4.72 (t, *J* = 4.4 Hz, 1H), 4.58 - 4.55 (m, 1H), 4.49 - 4.45 (m, 1H), 4.35 - 4.30 (m, 2H), 3.03 (s, 1H), 0.95 (s, 9H), 0.84 (s, 9H), 0.14 (d, *J* = 4.0 Hz, 6H), 0.002 (s, 3H), -0.13 (s, 3H).

**7-((2R,3R,4R,5S)-5-((Benzo[d]thiazol-2-ylthio)methyl)-3,4-bis((tert-butyldimethylsilyl)oxy)tetrahydrofuran-2-yl)-5-iodo-7H-pyrrolo[2,3-d]pyrimidin-4-amine (69)**

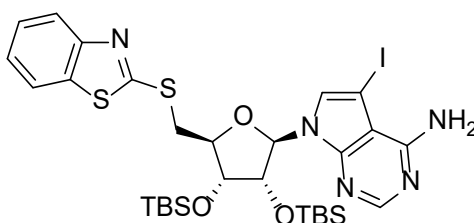

To a solution of compound **68** (1 g, 1.43 mmol) in DMF (3 mL) was added 1,3-benzothiazol-2-ylsulfanyl sodium (812 mg, 4.29 mmol). The resulting mixture was stirred at 50 °C for 12 h. The reaction mixture was cooled to RT, quenched with water (20 mL) and the resulting aqueous layer extracted with EtOAc (3 x 10 mL). The combined organic layers were washed with brine (10 mL), dried over sodium sulphate, filtered, and the filtrate was concentrated under reduced pressure. The residue was purified by flash column chromatography (petroleum ether/ethyl acetate gradient 0-15%) to afford compound **69** (1.05 g, 95% yield) as a yellow solid. LCMS (ES<sup>+</sup>, Method 3) *m/z* 770.2 [M+H]<sup>+</sup>; <sup>1</sup>H NMR (400 MHz, CDCl<sub>3</sub>): δ 8.2 (s, 1H), 7.78 (d, *J* = 8.4 Hz, 1H), 7.77 (d, *J* = 8.0 Hz, 1H), 7.45 - 7.40 (m, 1H), 7.35 - 7.33 (m, 1H), 7.24 - 7.22 (m, 1H), 5.99 (d, *J* = 6.4 Hz, 1H), 5.66 (s, 2H), 4.99 - 4.96 (m, 1H), 4.45 (dd, *J* = 5.8, 2.4 Hz, 1H), 4.33 - 4.32 (m, 1H), 3.98 - 3.93 (m, 1H), 3.83 (d, *J* = 6.4 Hz, 1H), 2.05 (s, 4H), 1.28 - 1.25 (m, 4H), 0.97 - 0.91 (m, 10H), 0.11 (d, *J* = 9.3 Hz, 6H), -0.14 (s, 3H), -0.32 (s, 1H).

**4-Amino-7-[(2*R*,3*R*,4*R*,5*S*)-5-(1,3-benzothiazol-2-ylsulfanylmethyl)-3,4-bis[[*tert*-butyl(dimethyl)silyl]oxy]tetrahydrofuran-2-yl]pyrrolo[2,3-*d*]pyrimidine-5-carbonitrile (**70**)**

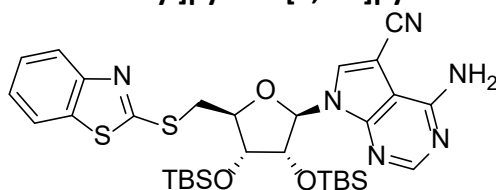

To a solution of compound **69** (100 mg, 129 μmol) in DMF (5 mL) was added Pd(PPh<sub>3</sub>)<sub>4</sub> (30.0 mg, 25.9 μmol) and zinc cyanide (30.5 mg, 259 μmol). The reaction mixture was stirred at 90 °C under inert atmosphere for 16 h. The reaction was quenched with water (20 mL) and extracted with EtOAc (3 x 10 mL). The combined organic layers were washed with brine (10 mL), dried over sodium sulfate, filtered, and the filtrate was concentrated under reduced pressure. The residue was purified by flash column chromatography (petroleum ether/ethyl acetate gradient 2-50%) to afford compound **70** (80.0 mg, 92% yield) as yellow oil. LCMS (ES<sup>+</sup>, Method 1) *m/z* 669.2 [M+H]<sup>+</sup>; <sup>1</sup>H NMR (400 MHz, CDCl<sub>3</sub>): δ 8.36 (s, 1H), 7.89 (d, *J* = 8.0 Hz, 1H), 7.78 - 7.77 (m, 2H), 7.44 (td, *J* = 8.4, 1.2 Hz, 1H), 7.32 (td, *J* = 8.0, 0.8 Hz, 1H), 5.97 (d, *J* = 6.0 Hz, 1H), 5.62 (s, 2H), 4.98 (dd, *J* = 5.6, 4.4 Hz, 1H), 4.50 - 4.48 (m, 1H), 4.29 (dd, *J* = 4.0, 2.8 Hz, 1H), 3.96 (dd, *J* = 14.4, 5.6 Hz, 1H), 3.88 (dd, *J* = 14.0, 5.6 Hz, 1H), 0.95 (s, 9H), 0.94 (s, 9H), 0.12 (s, 3H), 0.10 (s, 3H), -0.12 (s, 3H), -0.29 (s, 3H).

**4-Amino-7-[(2*R*,3*R*,4*S*,5*S*)-5-(1,3-benzothiazol-2-ylsulfanylmethyl)-3,4-dihydroxy-tetrahydrofuran-2-yl]pyrrolo[2,3-*d*]pyrimidine-5-carbonitrile (29)**

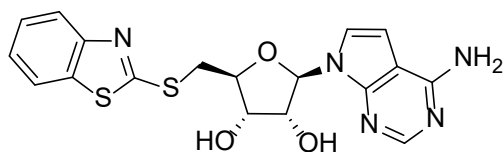

To a solution of compound **70** (80.0 mg, 0.12 mmol) in MeOH (3 mL) was added potassium fluoride (69.5 mg, 1.20 mmol). The resulting mixture was stirred at 60 °C for 16 h, cooled to RT and then concentrated under reduced pressure. The residue was purified by reverse column chromatography (0.05% NH<sub>3</sub>·H<sub>2</sub>O in water/MeCN gradient 0-25%) and then purified by prep-HPLC (Method 10) to afford compound **29** (6.36 mg, 12% yield) as a grey solid. HRMS (Method 1) *m/z* [M+H]<sup>+</sup> calcd for C<sub>19</sub>H<sub>16</sub>N<sub>6</sub>O<sub>3</sub>S<sub>2</sub> 441.0804; found 441.0817; <sup>1</sup>H NMR (400 MHz, DMSO-*d*<sub>6</sub>): δ 8.49 (s, 1H), 8.23 (s, 1H), 8.00 (d, *J* = 8.0 Hz, 1H), 7.86 (d, *J* = 8.0 Hz, 1H), 7.47 (t, *J* = 7.2 Hz, 1H), 7.37 (t, *J* = 7.6 Hz, 1H), 6.90 (brs, 2H), 6.10 (d, *J* = 5.6 Hz, 1H), 5.62 (d, *J* = 6.0 Hz, 1H), 5.51 (d, *J* = 4.8 Hz, 1H), 4.59 (q, *J* = 5.2 Hz, 1H), 4.28 - 4.19 (m, 2H), 3.84 (dd, *J* = 13.6, 5.2 Hz, 1H), 3.74 (dd, *J* = 13.6, 7.6 Hz, 1H).

### 1.9.9 Synthesis of compounds 30 and 31

#### Scheme S14

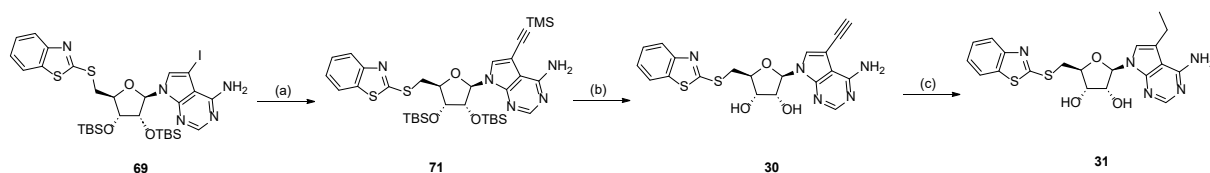

(a) TMS-acetylene, Pd(PPh<sub>3</sub>)<sub>4</sub>, Zn(CN)<sub>2</sub>, DMF, 60 °C, 2 h, 62%; (b) KF, MeOH, 60 °C, 16 h, 74%; (c) H<sub>2</sub>, Pd/C, RT, 2 h, 18%.

**7-[(2*R*,3*R*,4*R*,5*S*)-5-(1,3-benzothiazol-2-ylsulfanylmethyl)-3,4-bis [[*tert*-butyl(dimethyl)silyl]oxy]tetrahydrofuran-2-yl]-5-(2-trimethylsilylethynyl)pyrrolo[2,3-*d*]pyrimidin-4-amine (71)**

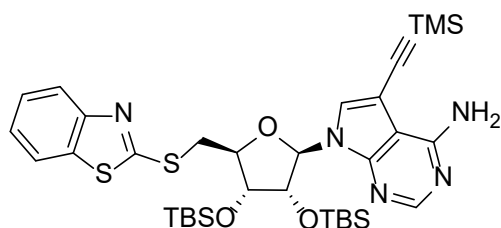



To a solution of compound **69** (200 mg, 259  $\mu$ mol) in THF (10 mL) was added ethynyl (trimethyl)silane (71.9  $\mu$ L, 519  $\mu$ mol), triethylamine (108  $\mu$ L, 779  $\mu$ mol), copper iodide (14.84 mg, 77.93  $\mu$ mol) and Pd(PPh<sub>3</sub>)<sub>4</sub> (30.0 mg, 25.9  $\mu$ mol). The reaction mixture was stirred at 60 °C under inert atmosphere for 2 h, cooled to RT and then concentrated under reduced pressure. The residue was purified by flash column chromatography (petroleum ether/ethyl acetate gradient 2-50%) to afford compound **71** (120 mg, 62% yield) as yellow oil. <sup>1</sup>H NMR (400 MHz, CDCl<sub>3</sub>):  $\delta$  8.26 (s, 1H), 7.89 - 7.87 (m, 1H), 7.77 - 7.75 (m, 1H), 7.44 - 7.40 (m, 1H), 7.36 (s, 1H), 7.33 - 7.29 (m, 1H), 5.96 (d, *J* = 6.0 Hz, 1H), 4.96 (dd, *J* = 6.4, 4.8 Hz, 1H), 4.45 - 4.43 (m, 1H), 4.31 (dd, *J* = 4.8, 2.8 Hz, 1H), 3.94 (dd, *J* = 14.0, 6.0 Hz, 1H), 3.82 (dd, *J* = 14.0, 6.8 Hz, 1H), 0.93 (s, 9H), 0.77 (s, 9H), 0.30 (s, 9H), 0.12 (s, 3H), 0.09 (s, 3H), -0.13 (s, 3H), -0.29 (s, 3H).

**(2*R*,3*R*,4*S*,5*S*)-2-(4-Amino-5-ethynyl-pyrrolo[2,3-*d*]pyrimidin-7-yl)-5-(1,3-benzothiazol-2-ylsulfanylmethyl)tetrahydrofuran-3,4-diol (**30**)**

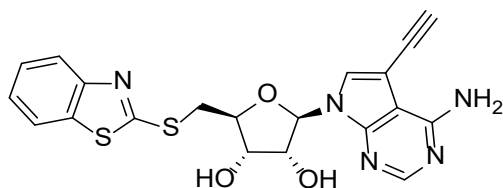

To a solution of compound **71** (100 mg, 0.14 mmol) in MeOH (10 mL) was added potassium fluoride (78.4 mg, 1.35 mmol). The reaction mixture was stirred at 70 °C for 16 h. The mixture was concentrated under reduced pressure and the residue was purified by reverse column chromatography (0.05% NH<sub>3</sub>·H<sub>2</sub>O in water/MeCN gradient 0-55%) to afford compound **30** (45.0 mg, 74% yield) as an off-white solid. HRMS (Method 1) *m/z* [M+H]<sup>+</sup> calcd for C<sub>20</sub>H<sub>17</sub>N<sub>5</sub>O<sub>3</sub>S<sub>2</sub> 440.0851; found 440.0851; <sup>1</sup>H NMR (400 MHz, DMSO-*d*<sub>6</sub>):  $\delta$  8.14 (s, 1H), 8.00 (d, *J* = 7.6 Hz, 1H), 7.88 - 7.86 (m, 2H), 7.47 (t, *J* = 7.6 Hz, 1H), 7.37 (t, *J* = 7.6 Hz, 1H), 6.73 (brs, 1H), 6.07 (d, *J* = 6.0 Hz, 1H), 5.58 (s, 1H), 4.58 (t, *J* = 5.6 Hz, 1H), 4.31 (s, 1H), 4.21 - 4.16 (m, 2H), 3.82 (dd, *J* = 13.2, 5.2 Hz, 1H), 3.72 (dd, *J* = 13.2, 7.2 Hz, 1H). [ $\alpha$ ]<sub>D</sub><sup>20</sup> = +28.3 (c=0.1, MeOH).

**(2*R*,3*R*,4*S*,5*S*)-2-(4-amino-5-ethyl-pyrrolo[2,3-*d*]pyrimidin-7-yl)-5-(1,3-benzothiazol-2-ylsulfanylmethyl)tetrahydrofuran-3,4-diol (**31**)**

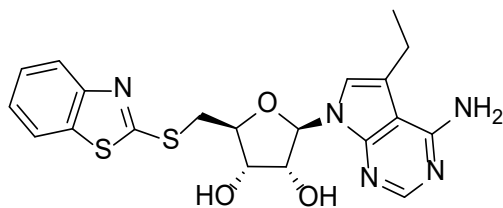

To a solution of compound **30** (20.0 mg, 45.5  $\mu\text{mol}$ ) in MeOH (8 mL) was added Pd/C (20.0 mg, 4.55  $\mu\text{mol}$ , 10%) under inert atmosphere. The suspension was degassed under reduced pressure and purged with  $\text{H}_2$  several times. The resulting mixture was stirred under hydrogen at RT for 2 h. The reaction mixture was filtered, and the filtrate was concentrated under reduced pressure. The residue was purified by reverse column chromatography (0.05%  $\text{NH}_3\cdot\text{H}_2\text{O}$  in water/MeCN gradient 0-55%) and then by prep-HPLC (Method 11) to afford compound **31** (3.24 mg, 18% yield) as a white solid. HRMS (Method 1)  $m/z$   $[\text{M}+\text{H}]^+$  calcd for  $\text{C}_{20}\text{H}_{21}\text{N}_5\text{O}_3\text{S}_2$  444.1164; found 444.1124;  $^1\text{H}$  NMR (400 MHz,  $\text{DMSO}-d_6$ ):  $\delta$  8.03 (s, 1H), 8.00 (d,  $J = 8.0$  Hz, 1H), 7.86 (d,  $J = 8.0$  Hz, 1H), 7.47 (t,  $J = 8.0$  Hz, 1H), 7.36 (t,  $J = 7.6$  Hz, 1H), 7.07 (s, 1H), 6.56 (s, 2H), 6.07 (d,  $J = 6.0$  Hz, 1H), 5.38 - 5.35 (m, 2H), 4.52 (q,  $J = 5.2$  Hz, 1H), 4.16 - 4.14 (m, 2H), 3.81 (dd,  $J = 13.6, 5.2$  Hz, 1H), 3.68 (dd,  $J = 13.6, 6.8$  Hz, 1H), 2.75 (q,  $J = 7.2$  Hz, 2H), 1.18 (t,  $J = 7.6$  Hz, 3H).

### 1.9.10 Synthesis of compound 32

#### Scheme S15

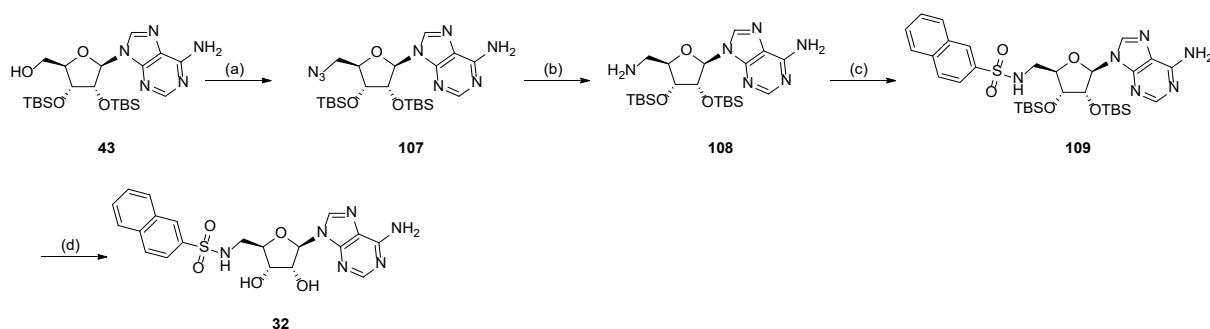

(a) DPPA,  $\text{PPh}_3$ , DIAD THF, 0  $^\circ\text{C}$  to RT, 16 h 38%; (b)  $\text{PPh}_3$ , THF, water, 40  $^\circ\text{C}$ , 16 h, 84%; (c) naphthalene-2-sulfonyl chloride, TEA, DMF, RT, 16 h, 50%; (d) KF DMF, 60  $^\circ\text{C}$ , 16 h, 44%.

**9-[(2*R*,3*R*,4*R*,5*R*)-5-(azidomethyl)-3,4-bis[[tert-butyl(dimethyl)silyl]oxy]tetrahydrofuran-2-yl]purin-6-amine (107)**

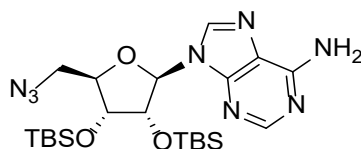

To a solution of compound **43** (1.00 g, 2.02 mmol) and triphenylphosphine (740 mg, 2.82 mmol) in THF (20 mL) was added diisopropyl azodicarboxylate (549  $\mu$ L, 2.82 mmol), followed by a solution of diphenyl phosphoryl azide (611  $\mu$ L, 2.82 mmol) in THF (10 mL) at 0 °C. The reaction mixture was warmed to RT, stirred for 16 h and then concentrated under reduced pressure. The residue was purified by flash column chromatography (petroleum ether/ethyl acetate gradient 0-25%) to afford compound **107** (400 mg, 38% yield) as a white solid. LCMS ( $\text{ES}^+$ , Method 1)  $m/z$  521.3  $[\text{M}+\text{H}]^+$ ;  $^1\text{H}$  NMR (400 MHz,  $\text{CDCl}_3$ ):  $\delta$  8.35 (s, 1H), 8.01 (s, 1H), 5.90 (d,  $J = 4.4$  Hz, 1H), 5.74 (s, 2H), 4.94 (t,  $J = 4.4$  Hz, 1H), 4.33 (t,  $J = 4.4$  Hz, 1H), 4.21 (q,  $J = 4.8$  Hz, 1H), 3.73 - 3.72 (m, 2H), 0.94 (s, 9H), 0.84 (s, 9H), 0.13 (s, 3H), 0.11 (s, 3H), -0.01 (s, 3H), -0.17 (s, 3H).

**9-[(2*R*,3*R*,4*R*,5*R*)-5-(Aminomethyl)-3,4-bis[[tert-butyl(dimethyl)silyl]oxy]tetrahydrofuran-2-yl]purin-6-amine (108)**

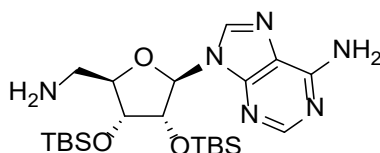

To a solution of compound **107** (400 mg, 768  $\mu$ mol) in THF (8 mL) and water (0.8 mL) was added triphenylphosphine (241 mg, 921  $\mu$ mol). The reaction mixture was stirred at 40 °C for 16 h and then concentrated under reduced pressure. The residue was purified by reverse column chromatography (0.05%  $\text{NH}_3 \cdot \text{H}_2\text{O}$  in water/MeCN gradient 0-25%) to afford compound **108** (320 mg, 84% yield) as a yellow solid. LCMS ( $\text{ES}^+$ , Method 2)  $m/z$  495.3  $[\text{M}+\text{H}]^+$ .

***N*-[[(2*R*,3*R*,4*R*,5*R*)-5-(6-Aminopurin-9-yl)-3,4-bis[[tert-butyl (dimethyl)silyl]oxy]tetrahydrofuran-2-yl]methyl]naphthalene-2-sulfonamide (109)**

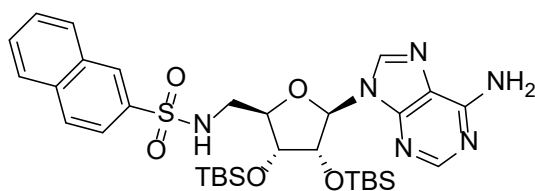

To a solution of compound **108** (50.0 mg, 101  $\mu$ mol) in DMF (2 mL) was added naphthalene-2-sulfonyl chloride (22.9 mg, 101  $\mu$ mol) at 0 °C and stirred at RT for 16 h. The reaction was quenched with water (10 mL) and extracted with EtOAc (3 x 10 mL). The combined organic layers were washed with brine (2 x 5 mL), dried over sodium sulfate, filtered and the filtrate was concentrated under reduced pressure. The residue was purified by preparative TLC (SiO<sub>2</sub>, petroleum ether/ethyl acetate 50%) to afford compound **109** (50.0 mg, 72% yield) as a white solid. LCMS (ES<sup>+</sup>, Method 2)  $m/z$  669.4 [M+H]<sup>+</sup>.

***N*-[[(2*R*,3*S*,4*R*,5*R*)-5-(6-Aminopurin-9-yl)-3,4-dihydroxy-tetrahydrofuran-2-yl]methyl]naphthalene-2-sulfonamide (**32**)**

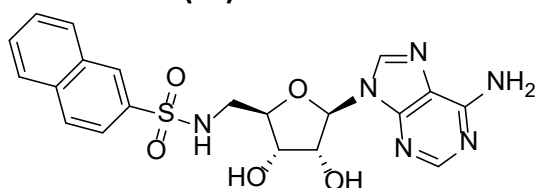

To a solution of compound **109** (50.0 mg, 72.9  $\mu$ mol) in DMF (2 mL) was added potassium fluoride (42.4 mg, 729  $\mu$ mol) and stirred at 60 °C for 16 h. The reaction mixture was then concentrated under reduced pressure. The residue was purified by prep-HPLC (Method 12) to afford compound **32** (14.9 mg, 44% yield) as a white solid. HRMS (Method 1)  $m/z$  [M+H]<sup>+</sup> calcd for C<sub>20</sub>H<sub>20</sub>N<sub>6</sub>O<sub>5</sub>S 457.1294; found 457.1380; <sup>1</sup>H NMR (400 MHz, DMSO-*d*<sub>6</sub>):  $\delta$  8.43 (s, 1H), 8.35 (s, 1H), 8.13 - 8.08 (m, 3H), 8.02 (d,  $J$  = 7.6 Hz, 1H), 7.80 (dd,  $J$  = 8.8, 2.0 Hz, 1H), 7.71 - 7.63 (m, 2H), 7.36 (s, 2H), 5.82 (d,  $J$  = 6.4 Hz, 1H), 5.38 (brs, 1H), 4.70 (t,  $J$  = 5.6 Hz, 1H), 4.09 - 4.07 (m, 1H), 4.01 - 3.99 (m, 1H), 3.10 (d,  $J$  = 4.8 Hz, 2H).  $[\alpha]_D^{20}$  = +61.3 (c=0.1, MeOH).

### 1.9.11 Synthesis of compound 34

#### Scheme S16

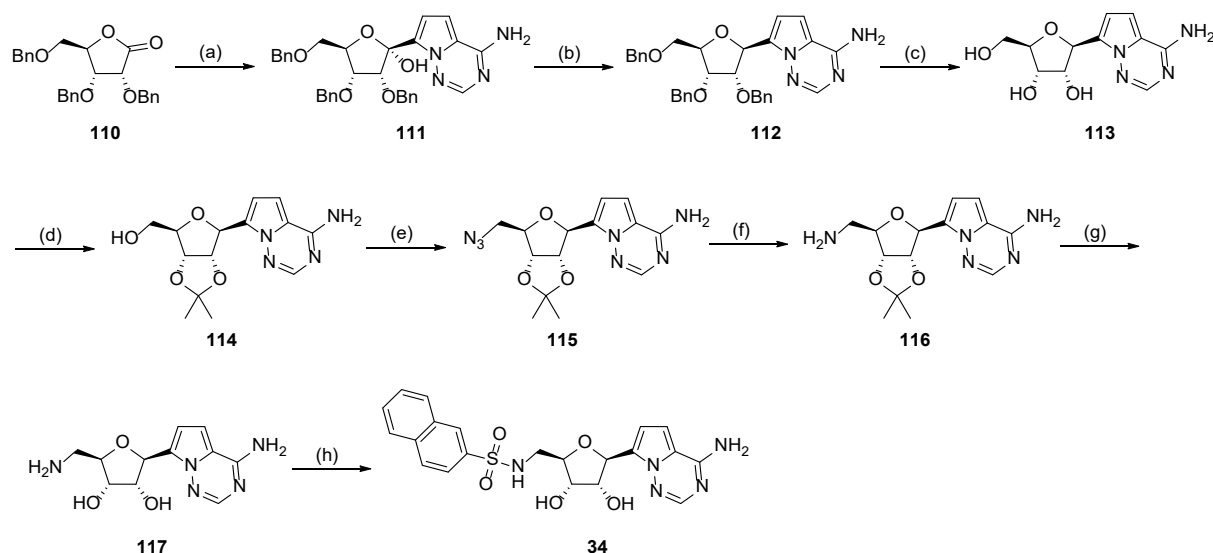

(a) 7-iodopyrrolo[2,1-f][1,2,4]triazin-4-amine **2**, *n*-BuLi, 1,2-bis(chlorodimethylsilyl)ethane, THF, -78 °C, 26%; (b) Et<sub>3</sub>SiH, BF<sub>3</sub>·Et<sub>2</sub>O DCM, 0 °C, RT, 97%; (c) H<sub>2</sub>, Pd/C AcOH, RT, 16 h, 84%; (d) 2,2-dimethoxypropane, TsOH, DMF, Acetone, 60 °C, 16 h, 92%; (e) DPPA, DIAD, PPh<sub>3</sub>, THF, 0 °C to RT, 16 h, 57%; (f) PPh<sub>3</sub>, H<sub>2</sub>O, THF, 40 °C, 16 h, 18%; (g) HCl, MeOH, H<sub>2</sub>O, RT, 2 h, 69%; (h) naphthalene-2-sulfonyl chloride TEA, DMF, 0 °C, 2 h, 17%.

**(2*S*,3*R*,4*R*,5*R*)-2-(4-Aminopyrrolo[2,1-f][1,2,4]triazin-7-yl)-3,4- dibenzyloxy-5-(benzyloxy methyl)tetrahydrofuran-2-ol (**111**)**

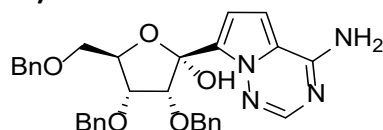

To a suspension of 7-iodopyrrolo[2,1-f][1,2,4]triazin-4-amine (4.92 g, 18.9 mmol) and chloro-[2-[chloro(dimethyl)silyl]ethyl]-dimethyl-silane (4.07 g, 18.9 mmol) in THF (70 mL) was added *n*-butyllithium (24.1 mL, 2.5 M in hexane) at -78 °C under inert atmosphere. The reaction mixture was stirred for 30 min prior to the addition of a solution of compound **110** (7.20 g, 17.2 mmol) in THF (20 mL) and then further stirred at -78 °C for 1 h. The reaction was quenched with sat. aq. ammonium chloride solution (150 mL) at 0 °C and then extracted with EtOAc (3 x 50 mL). The combined organic layers were washed with sat. aq. sodium bicarbonate (80 mL), brine (80 mL), dried over sodium sulfate, filtered, and the filtrate was concentrated under reduced pressure. The residue was purified by flash column chromatography (petroleum ether/ethyl acetate gradient 2-100%) to afford compound **111** (2.50 g, 26% yield) as yellow oil. LCMS (ES<sup>+</sup>, Method 2) *m/z* 575.4 [M+Na]<sup>+</sup>; <sup>1</sup>H NMR (400 MHz, DMSO-*d*<sub>6</sub>): δ 8.07 (s, 2H), 7.99 (s, 1H), 7.36 - 7.23 (m, 13H), 7.17 - 7.12 (m, 2H), 6.99 - 6.98 (m, 1H), 6.94 (d, *J* = 4.8 Hz, 1H), 5.38 (d, *J* = 6.0 Hz, 1H), 5.07 (d, *J* = 5.2 Hz, 1H), 7.57 (dd, *J* = 11.6, 2.4 Hz, 2H), 4.49

- 4.44 (m, 4H), 4.01 - 4.00 (m, 1H), 3.92 (t,  $J = 6.0$  Hz, 1H), 3.68 (dd,  $J = 10.0, 3.2$  Hz, 1H), 3.46 (dd,  $J = 10.0, 6.4$  Hz, 1H).

**7-[(2*S*,3*S*,4*R*,5*R*)-3,4-Dibenzyloxy-5-(benzyloxymethyl) tetrahydrofuran-2-yl]pyrrolo[2,1-*f*][1,2,4]triazin-4-amine (112)**

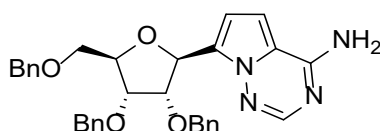

To a solution of compound **111** (2.00 g, 3.62 mmol) and triethylsilane (1.50 mL, 9.41 mmol) in DCM (20 mL) was added dropwise boron trifluoride diethyl etherate (1.43 mL, 5.43 mmol, 47% purity) at 0 °C under inert atmosphere and stirred for 2 h. The reaction mixture was quenched with sat. aq. sodium bicarbonate (50 mL) at 0 °C, and then extracted with DCM (3 x 20 mL). The combined organic layers were dried over sodium sulfate, filtered and the filtrate was concentrated under reduced pressure. The residue was purified by flash column chromatography (petroleum ether/ethyl acetate gradient 0-50%) to afford compound **112** (1.90 g, 97% yield) As yellow oil. LCMS (ES<sup>+</sup>, Method 3)  $m/z$  537.4 [M+H]<sup>+</sup>; <sup>1</sup>H NMR (400 MHz, CDCl<sub>3</sub>):  $\delta$  7.92 (s, 1H), 7.36 - 7.28 (s, 15H), 6.73 (d,  $J = 4.8$  Hz, 1H), 6.60 (d,  $J = 4.4$  Hz, 1H), 5.68 (d,  $J = 4.0$  Hz, 1H), 4.74 (s, 2H), 4.63 - 4.53 (m, 3H), 4.47 - 4.44 (m, 1H), 4.42 - 4.40 (m, 1H), 4.27 (t,  $J = 4.4$  Hz, 1H), 4.16 - 4.14 (m, 1H), 3.79 (dd,  $J = 10.8, 3.6$  Hz, 1H), 3.67 (dd,  $J = 10.8, 4.0$  Hz, 1H).

**(2*S*,3*R*,4*S*,5*R*)-2-(4-Aminopyrrolo[2,1-*f*][1,2,4]triazin-7-yl) -5-(hydroxymethyl) tetrahydrofuran-3,4-diol (113)**

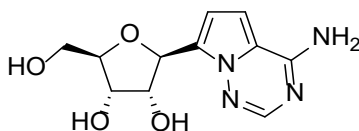

To a solution compound **112** (1.90 g, 3.54 mmol) in acetic acid (30 mL) was added Pd/C (1.00 g, 354  $\mu$ mol, 10% wt.) under inert atmosphere. The reaction mixture was degassed and refilled with H<sub>2</sub> three times and stirred under a H<sub>2</sub> atmosphere (50 psi) at RT for 16 h. The mixture was filtered, and the filtrate was concentrated under reduced pressure to afford compound **113** (800 mg, 84% yield) as a white solid. The isolated product was used in the

following step without any further purification. LCMS (ES<sup>+</sup>, Method 4)  $m/z$  267.1 [M+H]<sup>+</sup>; <sup>1</sup>H NMR (400 MHz, DMSO-*d*<sub>6</sub>):  $\delta$  7.82 (s, 1H), 7.68 (s, 1H), 6.84 (d,  $J$  = 4.8 Hz, 1H), 6.68 (d,  $J$  = 4.8 Hz, 1H), 5.11 (d,  $J$  = 6.8 Hz, 1H), 4.23 (t,  $J$  = 6.0 Hz, 1H), 3.95 (t,  $J$  = 5.6 Hz, 1H), 3.79 (q,  $J$  = 4.8 Hz, 1H), 3.55 (dd,  $J$  = 12.0, 4.0 Hz, 1H), 3.45 (dd,  $J$  = 12.4, 5.2 Hz, 1H).

**[(3a*S*,4*S*,6*R*,6a*R*)-4-(4-Aminopyrrolo[2,1-*f*][1,2,4]triazin-7-yl)-2,2 -dimethyl-3a,4,6,6a-tetrahydrofuro[3,4-*d*][1,3]dioxol-6-yl]methanol (**114**)**

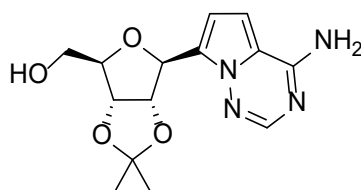

To a solution of compound **113** (800 mg, 3.00 mmol) in DMF (10 mL) and acetone (10 mL) was added 2,2-dimethoxypropane (368  $\mu$ L, 3.00 mmol) and 4-methylbenzenesulfonic acid (628 mg, 3.31 mmol) and stirred at 60 °C for 16 h. The reaction mixture was cooled to RT, quenched with sat. aq. sodium bicarbonate (50 mL) and extracted with EtOAc (3 x 30 mL). The combined organic layers were washed with brine (3 x 20 mL), dried over sodium sulfate, filtered and the filtrate was concentrated under reduced pressure. The residue was purified by reverse column chromatography (0.05% TFA in water/MeCN gradient 0-55%) to afford compound **114** (850 mg, 92% yield) as a white solid. LCMS (ES<sup>+</sup>, Method 3)  $m/z$  307.2 [M+H]<sup>+</sup>; <sup>1</sup>H NMR (400 MHz, DMSO-*d*<sub>6</sub>):  $\delta$  7.85 (s, 1H), 7.74 (s, 2H), 6.84 (d,  $J$  = 4.4 Hz, 1H), 6.74 (d,  $J$  = 4.4 Hz, 1H), 5.22 (d,  $J$  = 4.8 Hz, 1H), 5.03 (t,  $J$  = 5.2 Hz, 1H), 4.88 (t,  $J$  = 6.0 Hz, 1H), 4.72 (dd,  $J$  = 6.8, 4.0 Hz, 1H), 3.97 (q,  $J$  = 4.0 Hz, 1H), 3.48 (t,  $J$  = 5.6 Hz, 2H), 1.50 (s, 3H), 1.30 (s, 3H).

**7-[(3a*S*,4*S*,6*R*,6a*R*)-6-(Azidomethyl)-2,2-dimethyl-3a,4,6,6a-tetrahydrofuro[3,4-*d*][1,3]dioxol-4-yl]pyrrolo[2,1-*f*][1,2,4]triazin-4-amine (**115**)**

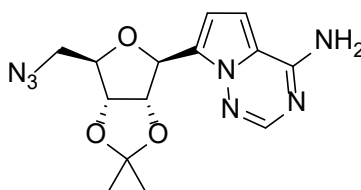

To a solution of compound **114** (480 mg, 1.57 mmol) and triphenylphosphine (575 mg, 2.19 mmol) in THF (6 mL) was added diisopropyl azodicarboxylate (425  $\mu$ L, 2.19 mmol), followed by a solution of diphenyl phosphoryl azide (473  $\mu$ L 2.19 mmol) in THF (2 mL) at 0°C under inert atmosphere. The reaction mixture was warmed to RT, stirred for 16 h and then concentrated under reduced pressure. The residue was purified by reverse column chromatography (0.05% TFA in water/MeCN gradient 0-25%) to afford compound **115** (300 mg, 57% yield) as a white solid. LCMS (ES<sup>+</sup>, Method 1)  $m/z$  332.2 [M+H]<sup>+</sup>.

**7-[(3a*S*,4*S*,6*R*,6a*R*)-6-(Aminomethyl)-2,2-dimethyl-3a,4,6,6a-tetrahydrofuro[3,4-*d*][1,3]dioxol-4-yl]pyrrolo[2,1-*f*][1,2,4]triazin-4-amine (**116**)**

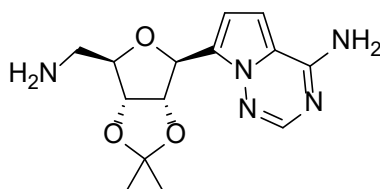

To a solution of compound **115** (300 mg, 0.91 mmol) in THF (5 mL) and water (0.5 mL) was added triphenylphosphine (284 mg, 1.09 mmol) and stirred at 40 °C for 16 h. The reaction mixture was cooled to RT and then concentrated under reduced pressure. The residue was purified by reverse column chromatography (0.05% NH<sub>3</sub>·H<sub>2</sub>O in water/MeCN gradient 0-25%) to afford compound **116** (50.0 mg, 18% yield) as a yellow solid. LCMS (ES<sup>+</sup>, Method 2)  $m/z$  306.21 [M+H]<sup>+</sup>.

**(2*R*,3*S*,4*R*,5*S*)-2-(Aminomethyl)-5-(4-aminopyrrolo[2,1-*f*][1,2,4] triazin-7-yl)tetrahydrofuran-3,4-diol (**117**)**

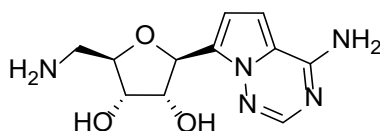

To a solution of compound **116** (50.0 mg, 163  $\mu$ mol) in MeOH (3 mL) was added hydrochloric acid (3 mL, 1N in MeOH) and stirred at RT for 2 h. The reaction mixture was then concentrated under reduced pressure. The residue was purified by reverse column chromatography (0.05% NH<sub>3</sub>·H<sub>2</sub>O in water/MeCN gradient 0-5%) to afford compound **117** (30.0 mg, 69% yield) as a yellow solid. LCMS (ES<sup>+</sup>, Method 6)  $m/z$  266.3 [M+H]<sup>+</sup>.



***N*-[[*(2R,3S,4R,5S)*-5-(4-Aminopyrrolo[2,1-*f*][1,2,4]triazin-7-yl)-3,4-dihydroxy-tetrahydrofuran-2-yl]methyl]naphthalene-2-sulfonamide (**34**)**

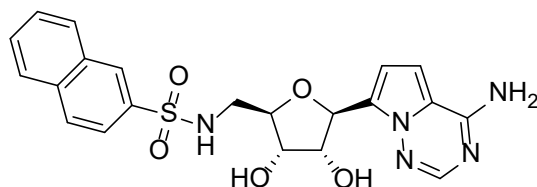

To a solution of compound **117** (30.0 mg, 113  $\mu$ mol) in DMF (1 mL) was added triethylamine (47.2  $\mu$ L 339  $\mu$ mol) and naphthalene-2-sulfonyl chloride (25.6 mg, 113  $\mu$ mol) at 0 °C and stirred for 2 h. The reaction mixture was concentrated under reduced pressure. The residue was purified by prep-HPLC (Method 13) to afford compound **34** (9.23 mg, 17% yield) as an off-white solid. HRMS (Method 1)  $m/z$   $[M+H]^+$  calcd for  $C_{21}H_{21}N_5O_5S$  456.1342; found 456.1329;  $^1H$  NMR (400 MHz,  $DMSO-d_6$ ):  $\delta$  8.45 (s, 1H), 8.12 (t,  $J$  = 8.0 Hz, 2H), 8.03 (d,  $J$  = 8.0 Hz, 1H), 7.97 (t,  $J$  = 6.0 Hz, 1H), 7.83 - 7.81 (m, 2H), 7.75 - 7.64 (m, 4H), 6.81 (d,  $J$  = 4.4 Hz, 1H), 6.62 (d,  $J$  = 4.4 Hz, 1H), 5.03 (t,  $J$  = 6.4 Hz, 2H), 4.98 (d,  $J$  = 5.2 Hz, 1H), 4.29 (q,  $J$  = 6.0 Hz, 1H), 3.90 - 3.86 (m, 1H), 3.85 - 3.82 (m, 1H), 3.03 - 3.01 (m, 1H), 2.96 - 2.94 (m, 1H).

### 1.9.12 Synthesis of compounds 35-38

#### Scheme S17

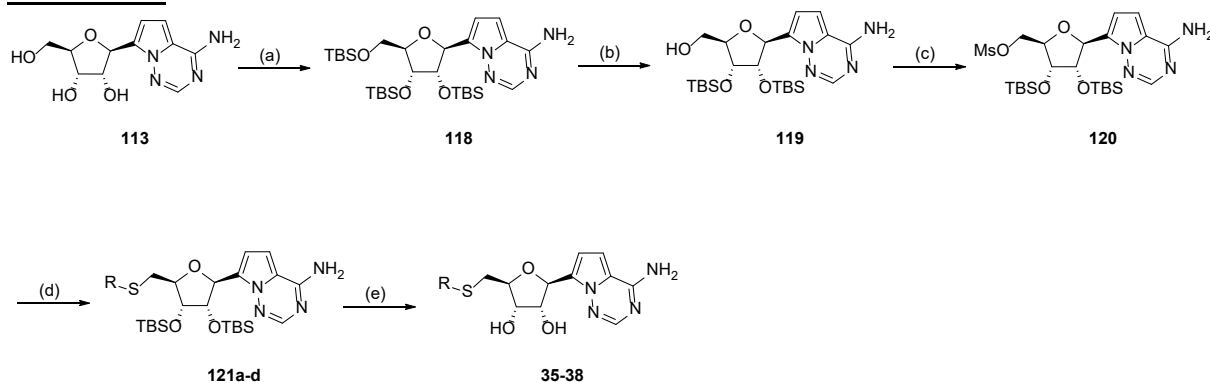

(a) TBSCl, imidazole, DMF, RT, 2 h, 94%; (b)  $CCl_3COOH$ , THF, 0 °C, 4 h, 98%; (c)  $Ms_2O$  TEA, THF, 0 °C, 2 h, 52%; (d)  $R-SH$ , NaH, THF, 0-70 °C, 16 h, 69-89%; (e) KF, DMF, 70 °C, 16 h, 13-72 %.

**7-[[*(2S,3S,4R,5R)*-3,4-Bis[[*tert*-butyl(dimethyl)silyl]oxy]-5-[[*tert*-butyl(dimethyl)silyl]oxymethyl]tetrahydrofuran-2-yl]pyrrolo[2,1-*f*][1,2,4]triazin-4-amine (**118**)**

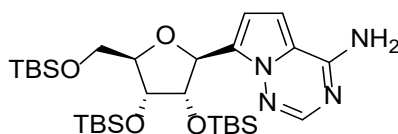

To a solution of compound **113** (3.00 g, 11.3 mmol) in DMF (30 mL) was added imidazole (8.44 g, 124 mmol) and *tert*-butylchloro dimethylsilane (7.62 mL, 61.9 mmol) and stirred at RT for 2 h. The reaction mixture was quenched with water (100 mL) and extracted with EtOAc (3 x 50 mL). The combined organic layers were washed with brine (4 x 20 mL), dried over sodium sulfate, filtered and the filtrate was concentrated under reduced pressure. The residue was purified by flash column chromatography (petroleum ether/ethyl acetate gradient 0-20%) to afford compound **118** (6.50 g, 94% yield) as yellow oil. LCMS (ES<sup>+</sup>, Method 2) *m/z* 609.5 [M+H]<sup>+</sup>; <sup>1</sup>H NMR (400 MHz, CDCl<sub>3</sub>): δ 7.89 (s, 1H), 6.75 (d, *J* = 4.8 Hz, 1H), 6.59 (d, *J* = 4.4 Hz, 1H), 5.37 (d, *J* = 5.6 Hz, 1H), 4.53 - 4.51 (m, 1H), 4.26 - 4.24 (m, 1H), 4.06 (q, *J* = 4.0 Hz, 1H), 3.90 (dd, *J* = 10.8, 4.8 Hz, 1H), 3.75 (dd, *J* = 11.2, 3.6 Hz, 1H), 0.91 (s, 9H), 0.80 (s, 9H), 0.08 (s, 3H), 0.06 (s, 3H), -0.06 (s, 3H), -0.21 (s, 3H).

**[(2*R*,3*R*,4*S*,5*S*)-5-(4-Aminopyrrolo[2,1-*f*][1,2,4]triazin-7-yl)-3,4-bis[[*tert*-butyl(dimethyl)silyl]oxy]tetrahydrofuran-2-yl]methanol (**119**)**

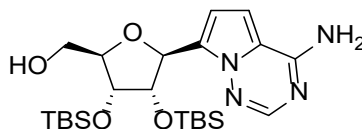

To a solution of compound **118** (5.00 g, 8.21 mmol) in THF (50 mL) was added a solution of 2,2,2-trichloroacetic acid (13.4 g, 82.2 mmol) in water (15 mL) at 0 °C and stirred for 4 h. The reaction mixture was quenched by sat. aq. sodium bicarbonate (100 mL) and extracted with EtOAc (3 x 50 mL). The combined organic layers were washed with brine (3 x 20 mL), dried over sodium sulfate, filtered and the filtrate was concentrated under reduced pressure. The residue was purified by flash column chromatography (petroleum ether/ethyl acetate gradient 0-25%) to afford compound **119** (4.00 g, 98% yield) as a white solid. LCMS (ES<sup>+</sup>, Method 2) *m/z* 495.4 [M+H]<sup>+</sup>; <sup>1</sup>H NMR (400 MHz, CDCl<sub>3</sub>): δ 7.92 - 7.91 (m, 1H), 6.71 - 6.70 (m, 1H), 6.61 (d, *J* = 4.4 Hz, 1H), 5.99 (brs, 2H), 5.28 (s, 1H), 5.11 (d, *J* = 9.2 Hz, 1H), 4.90 (dd, *J* = 8.8, 4.8 Hz, 1H), 4.29 (d, *J* = 4.8 Hz, 1H), 4.15 - 4.10 (m, 1H), 3.89 (dd, *J* = 12.4, 2.0 Hz, 1H), 3.70

(d,  $J = 12.4$  Hz, 1H), 0.95 (s, 9H), 0.73 (s, 9H), 0.12 (s, 3H), 0.11 (s, 3H), -0.19 (s, 3H), -0.67 (s, 3H).

**[(2*R*,3*R*,4*S*,5*S*)-5-(4-Aminopyrrolo[2,1-*f*][1,2,4]triazin-7-yl)-3,4-bis [[tert-butyl(dimethyl)silyl]oxy]tetrahydrofuran-2-yl)methyl methanesulfonate (**120**)**

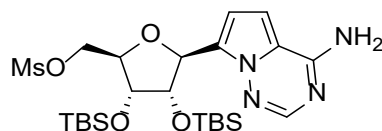

To a solution of compound **119** (1.00 g, 2.02 mmol) and triethylamine (2.81 mL, 20.2 mmol) in THF (10 mL) was added a solution of methanesulfonic anhydride (1.06 g, 6.06 mmol) in THF (5 mL) at 0 °C under inert atmosphere and stirred for 2 h. The reaction mixture was quenched with sat. aq. sodium bicarbonate (20 mL) at 0 °C, and then extracted with EtOAc (3 x 20 mL). The combined organic layers were washed with brine (3 x 10 mL), dried over sodium sulfate, filtered and the filtrate was concentrated under reduced pressure. The residue was purified by flash column chromatography (petroleum ether/ethyl acetate gradient 0-50%) to afford compound **120** (600 mg, 52% yield) as a white solid. LCMS (ES<sup>+</sup>, Method 2)  $m/z$  573.4 [M+H]<sup>+</sup>; <sup>1</sup>H NMR (400 MHz, CDCl<sub>3</sub>):  $\delta$  7.94 (s, 1H), 6.72 (d,  $J = 4.4$  Hz, 1H), 6.62 (d,  $J = 4.4$  Hz, 1H), 5.67 (s, 2H), 5.39 (d,  $J = 3.6$  Hz, 1H), 4.55 - 4.50 (m, 2H), 4.42 (dd,  $J = 11.2, 4.8$  Hz, 1H), 4.29 - 4.21 (m, 2H), 2.96 (s, 3H), 0.93 (s, 9H), 0.87 (s, 9H), 0.11 (s, 3H), 0.09 (s, 3H), 0.02 (s, 3H), -0.06 (s, 3H).

**7-[(2*S*,3*S*,4*R*,5*S*)-5-(1,3-Benzothiazol-2-ylsulfanylmethyl)-3,4-bis[[tert-butyl(dimethyl)silyl]oxy]tetrahydrofuran-2-yl]pyrrolo[2,1-*f*][1,2,4]triazin-4-amine (**121a**)**

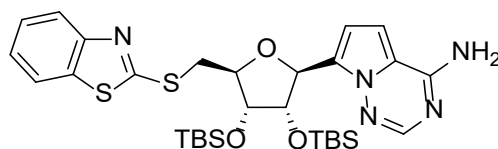

To a solution of compound **120** (100 mg, 174  $\mu$ mol) in DMF (1 mL) was added 1,3-benzothiazol-2-ylsulfanyl sodium (165 mg, 872  $\mu$ mol) and stirred at 50 °C for 16 h. The reaction mixture was cooled to RT, quenched with water (20 mL) and extracted with EtOAc (3 x 10 mL). The combined organic layers were washed with brine (3 x 10 mL), dried over sodium sulfate,

filtered and the filtrate was concentrated under reduced pressure. The residue was purified by flash column chromatography (petroleum ether/ethyl acetate gradient 0-50%) to afford compound **121a** (100 mg, 89% yield) as a yellow solid. LCMS (ES<sup>+</sup>, Method 2) *m/z* 644.4 [M+H]<sup>+</sup>; <sup>1</sup>H NMR (400 MHz, CDCl<sub>3</sub>): δ 7.91 (s, 1H), 7.85 (d, *J* = 8.0 Hz, 1H), 7.75 (d, *J* = 7.6 Hz, 1H), 7.42 (t, *J* = 7.2 Hz, 1H), 7.32 - 7.29 (m, 1H), 6.77 (d, *J* = 4.8 Hz, 1H), 6.64 (d, *J* = 4.8 Hz, 1H), 5.70 (s, 2H), 5.34 (d, *J* = 5.6 Hz, 1H), 4.75 (t, *J* = 4.4 Hz, 1H), 4.44 (q, *J* = 4.4 Hz, 1H), 4.26 (t, *J* = 4.0 Hz, 1H), 3.95 (dd, *J* = 13.6, 5.6 Hz, 1H), 3.70 (dd, *J* = 13.6, 6.4 Hz, 1H), 0.94 (s, 9H), 0.80 (s, 9H), 0.11 (s, 3H), 0.09 (s, 3H), -0.07 (s, 3H), -0.24 (s, 3H).

**7-[(2S,3S,4R,5S)-3,4-Bis[[tert-butyl(dimethyl)silyl]oxy]-5-[(6-methyl-1,3-benzothiazol-2-yl)sulfanylmethyl]tetrahydrofuran-2-yl]pyrrolo[2,1-f][1,2,4]triazin-4-amine (121b)**

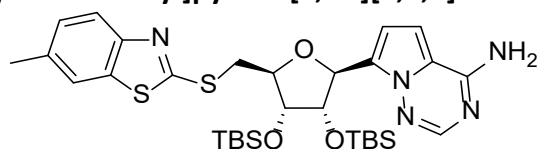

To a solution of 6-methyl-1,3-benzothiazole-2-thiol (63.3 mg, 349 μmol) in THF (2 mL) was added sodium hydride (13.9 mg, 349 μmol, 60% dispersion in mineral oil) at 0°C under inert atmosphere and stirred for 30 min. A solution of compound **120** (100 mg, 174 μmol) in THF (2 mL) was added and gradually heated to 70 °C and stirred for 16 h. The reaction mixture was cooled to RT, quenched with water (20 mL) and extracted with EtOAc (3 x 10 mL). The combined organic layers were washed with brine (10 mL), dried over sodium sulfate, filtered and the filtrate was concentrated under reduced pressure. The residue was purified by flash column chromatography (petroleum ether/ethyl acetate gradient 0-50%) to afford compound **121b** (80.0 mg, 69% yield) as a white solid. LCMS (ES<sup>+</sup>, Method 2) *m/z* 658.4 [M+H]<sup>+</sup>; <sup>1</sup>H NMR (400 MHz, CDCl<sub>3</sub>): δ 7.91 (s, 1H), 7.73 (d, *J* = 8.4 Hz, 1H), 7.54 (s, 1H), 7.22 (d, *J* = 8.4 Hz, 1H), 6.77 (d, *J* = 4.8 Hz, 1H), 6.64 (d, *J* = 4.8 Hz, 1H), 5.67 (s, 2H), 5.34 (d, *J* = 5.6 Hz, 1H), 4.75 (dd, *J* = 5.6, 4.8 Hz, 1H), 4.44 - 4.40 (m, 1H), 4.25 (t, *J* = 4.0 Hz, 1H), 3.92 (dd, *J* = 13.6, 5.6 Hz, 1H), 3.68 (dd, *J* = 13.6, 6.4 Hz, 1H), 0.93 (s, 9H), 0.80 (s, 9H), 0.10 (s, 3H), 0.08 (s, 9H), -0.10 (s, 3H), -0.30 (s, 3H).

**7-[(2S,3S,4R,5S)-3,4-Bis[[tert-butyl(dimethyl)silyl]oxy]-5- (2-naphthylsulfanylmethyl)]**

**tetrahydrofuran-2-yl]pyrrolo[2,1-f][1,2,4]triazin-4-amine (121c)**

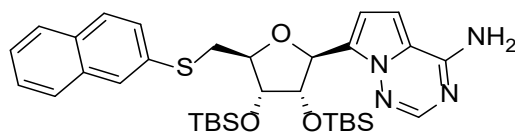

To a solution of naphthalene-2-thiol (55.9 mg, 349  $\mu\text{mol}$ ) in THF (2 mL) was added sodium hydride (13.9 mg, 349  $\mu\text{mol}$ , 60% dispersion in mineral oil) at 0 °C under inert atmosphere and stirred for 30 min. A solution of compound **120** (100 mg, 174  $\mu\text{mol}$ ) in THF (2 mL) was added, gradually then heated to 70 °C and stirred for 16 h. The reaction mixture was cooled to RT, quenched with water (20 mL) and extracted with EtOAc (3 x 10 mL). The combined organic layers were washed with brine (10 mL), dried over sodium sulfate, filtered and the filtrate was concentrated under reduced pressure. The residue was purified by flash column chromatography (petroleum ether/ethyl acetate gradient 0-50%) to afford compound **121c** (80.0 mg, 72% yield) as a white solid. LCMS (ES<sup>+</sup>, Method 2)  $m/z$  637.5 [M+H]<sup>+</sup>; <sup>1</sup>H NMR (400 MHz, CDCl<sub>3</sub>):  $\delta$  7.92 (s, 1H), 7.80 (s, 1H), 7.78 (d,  $J$  = 8.0 Hz, 1H), 7.73 (d,  $J$  = 8.8 Hz, 1H), 7.70 (d,  $J$  = 7.6 Hz, 1H), 7.48 - 7.41 (m, 3H), 6.74 (d,  $J$  = 4.4 Hz, 1H), 6.60 (d,  $J$  = 4.4 Hz, 1H), 5.62 (s, 2H), 5.33 (d,  $J$  = 5.6 Hz, 1H), 4.72 (t,  $J$  = 4.8 Hz, 1H), 4.32 (q,  $J$  = 4.8 Hz, 1H), 4.24 (t,  $J$  = 4.4 Hz, 1H), 3.53 (dd,  $J$  = 14.0, 6.4 Hz, 1H), 3.36 (dd,  $J$  = 14.0, 6.0 Hz, 1H), 0.91 (s, 9H), 0.79 (s, 9H), 0.08 (s, 3H), 0.07 (s, 3H), 0.01 (s, 3H), -0.24 (s, 3H).

**7-[(2S,3S,4R,5S)-3,4-Bis[[tert-butyl(dimethyl)silyl]oxy]- 5-(2-quinolylsulfanylmethyl) tetrahydrofuran-2-yl]pyrrolo[2,1-f][1,2,4]triazin-4- amine (121d)**

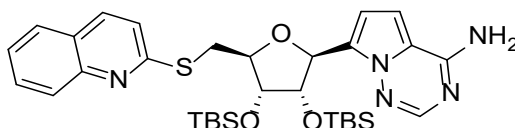

To a solution of quinoline-2-thiol (56.3 mg, 349  $\mu\text{mol}$ ) in THF (2 mL) was added sodium hydride (13.9 mg, 349  $\mu\text{mol}$ , 60% dispersion in mineral oil) at 0°C under inert atmosphere and stirred for 30 min. A solution of compound **120** (100 mg, 174  $\mu\text{mol}$ ) in THF (2 mL) was then added and gradually heated to 70 °C and stirred for 16 h. The reaction mixture was cooled to RT, quenched with water (20 mL) and extracted with EtOAc (3 x 10 mL). The combined organic

layers were washed with brine (10 mL), dried over sodium sulfate, filtered and the filtrate was concentrated under reduced pressure. The residue was purified by flash column chromatography (petroleum ether/ethyl acetate gradient 0-50%) to afford compound **121d** (80.0 mg, 72%) as a white solid. LCMS (ES<sup>+</sup>, Method 2)  $m/z$  638.5 [M+H]<sup>+</sup>; <sup>1</sup>H NMR (400 MHz, CDCl<sub>3</sub>):  $\delta$  7.95 - 7.94 (m, 2H), 7.89 (d,  $J$  = 8.4 Hz, 1H), 7.72 (d,  $J$  = 8.0 Hz, 1H), 7.64 (td,  $J$  = 7.2, 1.6 Hz, 1H), 7.44 (t,  $J$  = 6.8 Hz, 1H), 7.25 (d,  $J$  = 8.8 Hz, 1H), 6.79 (d,  $J$  = 4.4 Hz, 1H), 6.63 (d,  $J$  = 4.4 Hz, 1H), 5.70 (s, 2H), 5.36 (d,  $J$  = 6.0 Hz, 1H), 4.79 (dd,  $J$  = 5.6, 4.4 Hz, 1H), 4.43 - 4.39 (m, 1H), 4.24 (t,  $J$  = 4.0 Hz, 1H), 3.99 (dd,  $J$  = 14.0, 6.4 Hz, 1H), 3.70 (dd,  $J$  = 14.0, 6.8 Hz, 1H), 0.92 (s, 9H), 0.77 (s, 9H), 0.08 (s, 3H), 0.06 (s, 3H), -0.15 (s, 3H), -0.28 (s, 3H).

**(2S,3R,4S,5S)-2-(4-Aminopyrrolo[2,1-f][1,2,4]triazin-7-yl)-5- (1,3-benzothiazol-2-yl)sulfanylmethyl)tetrahydrofuran-3,4-diol (35)**

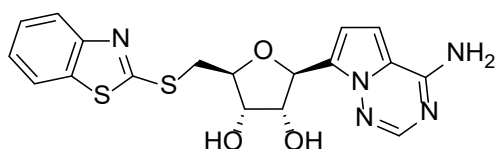

To a solution of compound **121a** (100 mg, 0.16 mmol) in DMF (1 mL) was added potassium fluoride (90.2 mg, 1.55 mmol) and stirred at 70 °C for 16 h. The reaction mixture was cooled to RT and then concentrated under reduced pressure. The residue was purified by prep-HPLC (Method 14) to afford compound **35** (59.6 mg, 91% yield) as a white solid. HRMS (Method 1)  $m/z$  [M+H]<sup>+</sup> calcd for C<sub>18</sub>H<sub>17</sub>N<sub>5</sub>O<sub>3</sub>S<sub>2</sub> 416.0851; found 416.0830; <sup>1</sup>H NMR (400 MHz, DMSO-*d*<sub>6</sub>):  $\delta$  8.00 (d,  $J$  = 7.6 Hz, 1H), 7.86 (d,  $J$  = 8.0 Hz, 1H), 7.84 (s, 1H), 7.70 (brs, 2H), 7.47 (td,  $J$  = 8.0, 0.8 Hz, 1H), 7.36 (td,  $J$  = 8.0, 0.8 Hz, 1H), 6.85 (d,  $J$  = 4.4 Hz, 1H), 6.70 (d,  $J$  = 4.4 Hz, 1H), 5.19 (dd,  $J$  = 6.0, 4.0 Hz, 2H), 5.15 (d,  $J$  = 6.0 Hz, 1H), 4.35 (q,  $J$  = 5.6 Hz, 1H), 4.12 (q,  $J$  = 6.4 Hz, 1H), 4.03 (q,  $J$  = 4.8 Hz, 1H), 3.77 (dd,  $J$  = 13.2, 4.8 Hz, 1H), 3.60 (dd,  $J$  = 13.2, 6.8 Hz, 1H). <sup>13</sup>C NMR (126 MHz, DMSO-*d*<sub>6</sub>)  $\delta$  166.61, 155.58, 152.61, 147.74, 134.61, 128.40, 126.37, 124.46, 121.80, 121.08, 114.94, 109.55, 100.79, 81.10, 76.16, 73.76, 73.68, 35.90. [ $\alpha$ ]<sub>D</sub><sup>20</sup> = -10.9 (c=0.1, MeOH).

**(2S,3R,4S,5S)-2-(4-Aminopyrrolo[2,1-f][1,2,4]triazin-7-yl)-5- [(6-methyl-1,3-benzothiazol-2-yl)sulfanylmethyl]tetrahydrofuran-3,4-diol (36)**

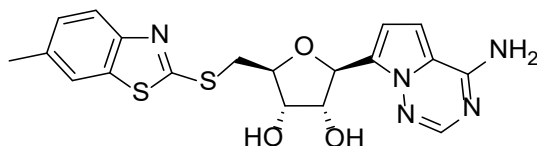

To a solution of compound **121b** (80.0 mg, 0.12 mmol) in DMF (1 mL) was added potassium fluoride (70.6 mg, 1.22 mmol) and stirred at 70 °C for 16 h. The reaction mixture was cooled to RT and then concentrated under reduced pressure. The residue was purified by prep-HPLC (Method 15) to afford compound **36** (6.85 mg, 13% yield) as a white solid. HRMS (Method 1)  $m/z$   $[M+H]^+$  calcd for  $C_{19}H_{19}N_5O_3S_2$  430.1008; found 430.1006;  $^1H$  NMR (400 MHz, DMSO- $d_6$ ):  $\delta$  7.83 (s, 1H), 7.79 (s, 1H), 7.74 (d,  $J$  = 8.0 Hz, 1H), 7.70 (brs, 1H), 7.28 (d,  $J$  = 7.6 Hz, 1H), 6.85 (d,  $J$  = 4.4 Hz, 1H), 6.69 (d,  $J$  = 4.4 Hz, 1H), 5.17 (t,  $J$  = 6.4 Hz, 2H), 5.13 (d,  $J$  = 6.4 Hz, 1H), 4.34 (q,  $J$  = 5.2 Hz, 1H), 4.10 (d,  $J$  = 6.4 Hz, 1H), 4.02 (q,  $J$  = 4.8 Hz, 1H), 3.73 (dd,  $J$  = 13.6, 5.2 Hz, 1H), 3.57 (dd,  $J$  = 12.8, 6.4 Hz, 1H), 2.41 (s, 3H).

**(2S,3R,4S,5S)-2-(4-Aminopyrrolo[2,1-f][1,2,4]triazin-7-yl)- 5-(2-naphthylsulfanylmethyl) tetrahydrofuran-3,4-diol (37)**

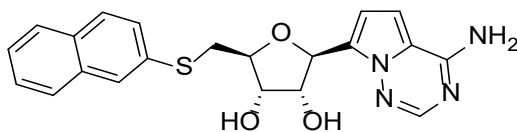

To a solution of compound **121c** (80.0 mg, 0.13 mmol) in DMF (1 mL) was added potassium fluoride (72.9 mg, 1.26 mmol) and stirred at 70 °C for 16 h. The reaction mixture was cooled to RT and then concentrated under reduced pressure. The residue was purified by prep-HPLC (Method 16) to afford compound **37** (21.6 mg, 42% yield) as a white solid. HRMS (Method 1)  $m/z$   $[M+H]^+$  calcd for  $C_{21}H_{20}N_4O_3S$  409.1334; found 409.1345;  $^1H$  NMR (400 MHz, DMSO- $d_6$ ):  $\delta$  7.89 - 7.82 (m, 4H), 7.81 (d,  $J$  = 8.0 Hz, 1H), 7.69 (brs, 2H), 7.51 - 7.43 (m, 3H), 6.84 (d,  $J$  = 4.8 Hz, 1H), 6.70 (d,  $J$  = 4.4 Hz, 1H), 5.18 (d,  $J$  = 6.0 Hz, 1H), 5.10 (d,  $J$  = 5.6 Hz, 2H), 4.34 (q,  $J$  = 5.2 Hz, 1H), 4.04 - 3.97 (m, 2H), 3.42 (dd,  $J$  = 13.6, 4.8 Hz, 1H), 3.30 - 3.25 (m, 1H).

**(2S,3R,4S,5S)-2-(4-Aminopyrrolo[2,1-f][1,2,4]triazin-7-yl)-5- (2-quinolylsulfanylmethyl) tetrahydrofuran-3,4-diol (38)**

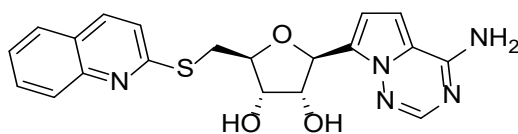

To a solution of compound **121d** (80.0 mg, 0.13 mmol) in DMF (1 mL) was added potassium fluoride (72.8 mg, 1.25 mmol) and stirred at 70 °C for 16 h. The reaction mixture was cooled to RT and then concentrated under reduced pressure. The residue was purified by prep-HPLC (Method 17) to afford compound **38** (9.52 mg, 19% yield) as a white solid. HRMS (Method 1)  $m/z$   $[M+H]^+$  calcd for  $C_{20}H_{19}N_5O_3S$  410.1287; found 410.1289;  $^1H$  NMR (400 MHz,  $DMSO-d_6$ ):  $\delta$  8.16 (d,  $J$  = 8.8 Hz, 1H), 7.89 (t,  $J$  = 8.4 Hz, 2H), 7.84 (s, 1H), 7.74 - 7.70 (m, 2H), 7.51 (t,  $J$  = 7.6 Hz, 1H), 7.40 (d,  $J$  = 8.4 Hz, 1H), 6.86 (d,  $J$  = 4.4 Hz, 1H), 6.72 (d,  $J$  = 4.4 Hz, 1H), 5.17 (d,  $J$  = 6.0 Hz, 1H), 5.08 (t,  $J$  = 5.6 Hz, 2H), 4.39 (q,  $J$  = 5.6 Hz, 1H), 4.07 (q,  $J$  = 4.8 Hz, 1H), 4.01 (q,  $J$  = 4.8 Hz, 1H), 3.70 (dd,  $J$  = 13.6, 6.0 Hz, 1H), 3.55 (dd,  $J$  = 13.6, 6.4 Hz, 1H).

### 1.9.13 Synthesis of compounds 39 and 40

#### Scheme S17

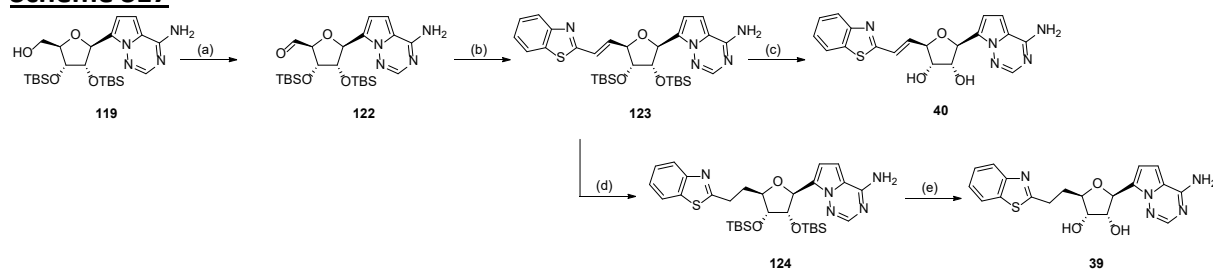

(a) IBX, MeCN, 80 °C, 2 h, 80%; (b) (benzo[d]thiazol-2-ylmethyl)triphenylphosphonium chloride, KHMDS, THF, -60 °C, 3 h, 79%; (c) KF, DMF, 70 °C, 16 h, 32%; (e)  $H_2$ , Pd/C, THF, RT, 2 h, 95%; (f) KF, DMF, 70 °C, 16 h, 56%

#### (2S,3R,4S,5S)-5-(4-Aminopyrrolo[2,1-f][1,2,4]triazin-7-yl)-3,4-bis [[tert-butyl(dimethyl)silyl]oxy]tetrahydrofuran-2-carbaldehyde (**122**)

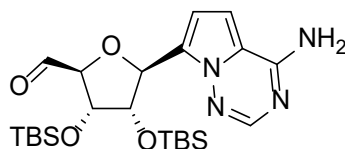

To a solution of compound **119** (300 mg, 0.61 mmol) in MeCN (10 mL) was added 1-hydroxy-1,2-benziodoxol-3(1H)-one 1-oxide (339 mg, 1.21 mmol) and stirred at 80 °C for 2 h. The reaction mixture was cooled to RT, quenched with sat. aq. sodium sulfite (10 mL) and extracted with EtOAc (3 x 10 mL). The combined organic layers were washed with brine (3 x



10 mL), dried over sodium sulfate, filtered and the filtrate was concentrated under reduced pressure. The residue was purified by flash column chromatography (petroleum ether/ethyl acetate gradient 0-33%) to afford compound **122** (240 mg, 80% yield) as a yellow solid. LCMS (ES<sup>+</sup>, Method 2) *m/z* 493.4 [M+H]<sup>+</sup>; <sup>1</sup>H NMR (400 MHz, CDCl<sub>3</sub>): δ 9.98 (s, 1H), 7.96 - 7.89 (m, 1H), 7.44 (t, *J* = 7.6 Hz, 1H), 7.15 (t, *J* = 8.0 Hz, 1H), 6.81 - 6.77 (m, 1H), 5.38 (d, *J* = 6.8 Hz, 1H), 4.92 - 4.89 (m, 1H), 4.76 - 4.74 (m, 1H), 1.01 (s, 9H), 0.81 (s, 9H), 0.16 (s, 3H), 0.15 (s, 3H), 0.08 (s, 1H), 0.05 (s, 3H).

**7-[(2*S*,3*S*,4*R*,5*R*)-5-[(*E*)-2-(1,3-Benzothiazol-2-yl)vinyl]-3,4-bis [[*tert*-butyl(dimethyl)silyl]oxy]tetrahydrofuran-2-yl]pyrrolo[2,1-*f*][1,2,4]triazin-4-amine (**123**)**

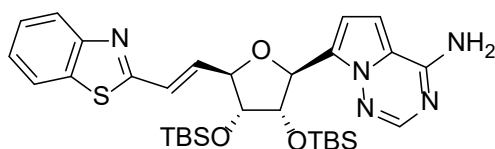

To a solution of (benzo[d]thiazol-2-ylmethyl)triphenylphosphonium chloride (108 mg, 243 μmol) in THF (3 mL) was added dropwise potassium bis(trimethylsilyl) amide (244 μL, 1.0 M in THF) at -60 °C under nitrogen and stirred for 30 min. A solution of compound **122** (80.0 mg, 162.35 μmol) in THF (2 mL) was added and stirred for 1 h. The reaction mixture was quenched with sat. aq. ammonium chloride (20 mL) and extracted with EtOAc (3 x 10 mL). The combined organic layers were washed with brine (2 x 10 mL), dried over sodium sulfate, filtered and the filtrate was concentrated under reduced pressure. The residue was purified by flash column chromatography (petroleum ether/ethyl acetate gradient 0-33%) to afford compound **123** (80.0 mg, 79% yield) as a yellow solid. LCMS (ES<sup>+</sup>, Method 2) *m/z* 624.5 [M+H]<sup>+</sup>; <sup>1</sup>H NMR (400 MHz, CDCl<sub>3</sub>): δ 8.02 - 8.00 (m, 3H), 7.98 (s, 1H), 7.87 (d, *J* = 8.0 Hz, 1H), 7.48 (t, *J* = 7.6 Hz, 1H), 7.39 (t, *J* = 7.2 Hz, 1H), 7.17 (dd, *J* = 12.0, 1.2 Hz, 1H), 6.93 (dd, *J* = 12.0, 6.4 Hz, 1H), 6.75 (d, *J* = 4.4 Hz, 1H), 6.67 (d, *J* = 4.4 Hz, 1H), 5.64 (s, 2H), 5.45 (d, *J* = 3.6 Hz, 1H), 4.74 (t, *J* = 6.0 Hz, 1H), 4.59 (t, *J* = 4.4 Hz, 1H), 4.18 - 4.15 (m, 1H), 0.94 (s, 9H), 0.89 (s, 9H), 0.09 (s, 3H), 0.08 (s, 3H), 0.03 (s, 3H), -0.06 (s, 3H).

**(2*S*,3*R*,4*S*,5*R*)-2-(4-aminopyrrolo[2,1-*f*][1,2,4]triazin-7-yl)-5-[(*E*)-2-(1,3-benzothiazol-2-yl)vinyl]tetrahydrofuran-3,4-diol (**40**)**

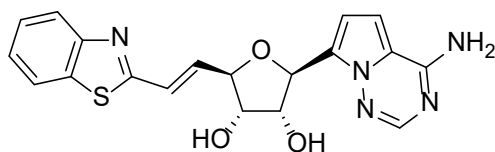

To a solution of compound **123** (50.0 mg, 80.1  $\mu$ mol) in DMF (1 mL) was added potassium fluoride (46.5 mg, 801  $\mu$ mol) and stirred at 70 °C for 16 h. The reaction mixture was cooled to RT and then concentrated under reduced pressure. The residue was purified by prep-HPLC (Method 18) to afford compound **40** (10.0 mg, 32% yield) as a yellow solid. HRMS (Method 1)  $m/z$   $[M+H]^+$  calcd for  $C_{19}H_{17}N_5O_3S$  396.1130; found 396.1139;  $^1H$  NMR (400 MHz,  $DMSO-d_6$ ):  $\delta$  8.07 (d,  $J$  = 7.6 Hz, 1H), 7.96 (d,  $J$  = 8.0 Hz, 1H), 7.87 (s, 1H), 7.74 (brs, 2H), 7.50 (td,  $J$  = 8.0, 0.8 Hz, 1H), 7.43 (td,  $J$  = 8.4, 1.2 Hz, 1H), 7.00 - 6.88 (m, 3H), 6.70 (d,  $J$  = 4.4 Hz, 1H), 5.33 - 5.25 (m, 3H), 4.51 (t,  $J$  = 5.2 Hz, 1H), 4.32 (q,  $J$  = 4.8 Hz, 1H), 4.04 (q,  $J$  = 5.2 Hz, 1H).

**7-((2S,3S,4R,5R)-5-(2-(benzo[d]thiazol-2-yl)ethyl)-3,4-bis((tert-butyl dimethylsilyl)oxy)tetrahydrofuran-2-yl)pyrrolo[2,1-f][1,2,4]triazin-4-amine (124)**

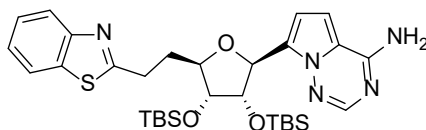

To a solution of compound **123** (100 mg, 160  $\mu$ mol) in THF (10 mL) was added Pd/C (50.0 mg, 160  $\mu$ mol, 10% wt.) under inert atmosphere. The suspension was degassed under vacuum and purged with  $H_2$  several times. The reaction mixture was stirred under  $H_2$  (50 psi) at RT for 2 h, and then filtered. The filtrate was concentrated under reduced pressure. The residue was purified by flash column chromatography (petroleum ether/ethyl acetate gradient 0-33%) to afford compound **124** (95.0 mg, 95% yield) as a yellow oil. LCMS ( $ES^+$ , Method 2)  $m/z$  626.5  $[M+H]^+$ ;  $^1H$  NMR (400 MHz,  $CDCl_3$ ):  $\delta$  7.98 (d,  $J$  = 8.4 Hz, 1H), 7.93 (s, 1H), 7.85 (d,  $J$  = 8.0 Hz, 1H), 7.46 (t,  $J$  = 7.6 Hz, 1H), 7.36 (t,  $J$  = 7.6 Hz, 1H), 6.68 (d,  $J$  = 4.4 Hz, 1H), 6.60 (d,  $J$  = 4.4 Hz, 1H), 5.70 (s, 2H), 5.32 (d,  $J$  = 4.8 Hz, 1H), 4.67 (t,  $J$  = 4.4 Hz, 1H), 4.17 - 4.15 (m, 1H), 4.04 (t,  $J$  = 4.4 Hz, 1H), 3.46 - 3.39 (m, 1H), 3.28 - 3.21 (m, 1H), 2.34 - 2.27 (m, 2H), 0.93 (s, 9H), 0.83 (s, 9H), 0.12 - 0.09 (m, 6H), -0.06 (s, 3H), -0.21 (s, 3H).

**(2S,3R,4S,5R)-2-(4-Aminopyrrolo[2,1-f][1,2,4]triazin-7-yl)-5-[2-(1,3-benzothiazol-2-**

**yl)ethyl]tetrahydrofuran-3,4-diol (**39**)**

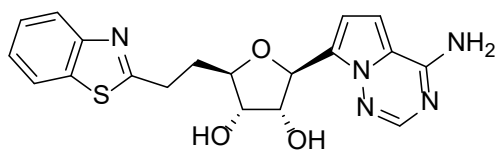

To a solution of compound **124** (90.0 mg, 0.14 mmol) in DMF (2 mL) was added potassium fluoride (83.5 mg, 1.44 mmol) and stirred at 70 °C for 16 h. The reaction mixture was cooled to RT and then concentrated under reduced pressure. The residue was purified by prep-HPLC (Method 19) to afford compound **39** (32.7 mg, 56% yield) as a white solid. HRMS (Method 1)  $m/z$   $[M+H]^+$  calcd for  $C_{19}H_{19}N_5O_3S$  398.1287; found 398.1292;  $^1H$  NMR (400 MHz,  $DMSO-d_6$ ):  $\delta$  8.05 (d,  $J$  = 8.0 Hz, 1H), 7.93 (d,  $J$  = 8.0 Hz, 1H), 7.84 (s, 1H), 7.70 (brs, 2H), 7.48 (td,  $J$  = 8.0, 0.8 Hz, 1H), 7.43 (td,  $J$  = 8.4, 1.2 Hz, 1H), 7.40 (dt,  $J$  = 8.4, 1.2 Hz, 1H), 6.85 (d,  $J$  = 7.6 Hz, 1H), 6.65 (d,  $J$  = 4.4 Hz, 1H), 5.14 (d,  $J$  = 5.6 Hz, 1H), 5.05 (d,  $J$  = 6.0 Hz, 1H), 4.98 (d,  $J$  = 5.6 Hz, 1H), 4.26 (q,  $J$  = 5.2 Hz, 1H), 3.89 - 3.83 (m, 2H), 3.23 - 3.17 (m, 2H), 2.02 - 2.18 (m, 1H), 2.08 - 2.05 (m, 1H).  $^{13}C$  NMR (126 MHz,  $DMSO-d_6$ )  $\delta$  171.39, 155.60, 152.81, 147.74, 134.68, 128.91, 126.01, 124.78, 122.13, 122.06, 114.86, 109.48, 100.79, 81.30, 76.31, 74.39, 73.91, 33.03, 30.00.  $[\alpha]_D^{20}$  = -5.3 ( $c=0.1$ , MeOH).

## 2 Supplementary Information

### 2.1 Crystallography table

|                                | SARS-CoV-2 nsp14                  |                                   |                                   |                                   |                                   |                                   |
|--------------------------------|-----------------------------------|-----------------------------------|-----------------------------------|-----------------------------------|-----------------------------------|-----------------------------------|
| Compound                       | 1                                 | 5                                 | 6                                 | 18                                | 26                                | 27                                |
| PDB ID                         | 9S0M                              | 9SAJ                              | 9SAK                              | 9SAL                              | 9SAM                              | 9SAN                              |
| Wavelength                     | 0.9537                            | 0.9537                            | 1.0000                            | 1.0000                            | 1.0000                            | 1.0000                            |
| Resolution range               | 63.96 - 2.85<br>(2.90 – 2.85)     | 64.04 - 2.48<br>(2.52 – 2.48)     | 44.84 - 2.30<br>(2.34 – 2.30)     | 41.26 - 2.29<br>(2.33 – 2.29)     | 44.59 - 2.54<br>(2.58 – 2.54)     | 44.79 - 2.73<br>(2.77 – 2.73)     |
| Space group                    | P 1 21 1                          |
| Unit cell                      | 67.59 101.86 91.02<br>90 108.9 90 | 67.81 102.36 90.74<br>90 109.2 90 | 67.38 102.05 90.87<br>90 108.7 90 | 67.69 101.63 91.41<br>90 108.6 90 | 67.58 101.99 91.19<br>90 109.4 90 | 67.81 102.08 91.25<br>90 109.3 90 |
| Total reflections              | 110868 (6040)                     | 174595 (9276)                     | 218043 (11092)                    | 290731 (15520)                    | 140935 (7106)                     | 134961 (6843)                     |
| Unique reflections             | 26758 (1348)                      | 40958 (2075)                      | 50538 (2551)                      | 51355 (2638)                      | 36568 (1911)                      | 31372 (1558)                      |
| Multiplicity                   | 4.1 (4.5)                         | 4.3 (4.5)                         | 4.3 (4.3)                         | 5.7 (5.9)                         | 3.9 (3.7)                         | 4.3 (4.4)                         |
| Completeness (%)               | 97.5 (100.0)                      | 98.6 (100.0)                      | 97.7 (100.0)                      | 97.4 (100.0)                      | 94.5 (99.9)                       | 99.9 (100.0)                      |
| Mean I/sigma(I)                | 12.3 (1.4)                        | 13.1 (1.3)                        | 16.8 (1.5)                        | 16.3 (1.3)                        | 14.8 (1.3)                        | 10.4 (1.3)                        |
| Wilson B-factor                | 72.26                             | 61.48                             | 66.24                             | 70.21                             | 75.80                             | 73.51                             |
| R-merge                        | 0.089 (1.031)                     | 0.060 (0.993)                     | 0.039 (0.825)                     | 0.044 (0.980)                     | 0.045 (0.926)                     | 0.086 (1.105)                     |
| R-meas                         | 0.102 (1.165)                     | 0.069 (1.128)                     | 0.044 (0.941)                     | 0.048 (1.077)                     | 0.052 (1.086)                     | 0.099 (1.257)                     |
| CC1/2                          | 0.998 (0.556)                     | 0.999 (0.647)                     | 0.999 (0.675)                     | 0.999 (0.653)                     | 0.999 (0.633)                     | 0.984 (0.473)                     |
| Reflections used in refinement | 25322 (1342)                      | 39956 (2064)                      | 49304 (2540)                      | 50028 (2609)                      | 35664 (1905)                      | 28313 (1556)                      |
| Reflections used for R-free    | 625 (64)                          | 997 (97)                          | 1224 (135)                        | 1304 (136)                        | 884 (94)                          | 717 (82)                          |
| R-work                         | 0.2307                            | 0.1978                            | 0.1984                            | 0.2012                            | 0.1936                            | 0.2122                            |
| R-free                         | 0.2817                            | 0.2378                            | 0.2487                            | 0.2281                            | 0.2282                            | 0.2647                            |

|                                  |       |       |       |       |       |       |
|----------------------------------|-------|-------|-------|-------|-------|-------|
| <b>Overall number of atoms</b>   | 7111  | 7225  | 7063  | 7012  | 7105  | 6898  |
| <b>in macromolecules</b>         | 7019  | 6983  | 6806  | 6826  | 6920  | 6773  |
| <b>in ligands</b>                | 73    | 119   | 115   | 87    | 83    | 72    |
| <b>in waters</b>                 | 19    | 123   | 142   | 99    | 102   | 53    |
| <b>Protein residues</b>          | 897   | 884   | 876   | 881   | 886   | 882   |
| <b>RMS (bonds)</b>               | 0.014 | 0.014 | 0.014 | 0.014 | 0.014 | 0.014 |
| <b>RMS (angles)</b>              | 1.727 | 1.701 | 1.688 | 1.708 | 1.682 | 1.751 |
| <b>Ramachandran favored (%)</b>  | 95.34 | 97.23 | 97.17 | 97.79 | 97.93 | 94.78 |
| <b>Ramachandran allowed (%)</b>  | 4.66  | 2.77  | 2.83  | 2.21  | 2.07  | 5.22  |
| <b>Ramachandran outliers (%)</b> | 0.00  | 0.00  | 0.00  | 0.00  | 0.00  | 0.00  |
| <b>Rotamer outliers (%)</b>      | 0.68  | 0.82  | 0.87  | 0.58  | 0.42  | 0.89  |
| <b>Clashscore</b>                | 1.25  | 0.58  | 0.60  | 0.60  | 0.22  | 1.54  |
| <b>Average B-factor</b>          | 74.02 | 67.05 | 75.91 | 82.16 | 81.72 | 74.65 |
| <b>for macromolecules</b>        | 74.13 | 67.23 | 76.18 | 82.42 | 81.96 | 74.84 |
| <b>for ligands</b>               | 65.02 | 64.78 | 71.95 | 77.27 | 72.83 | 62.25 |
| <b>for solvent</b>               | 68.27 | 58.88 | 66.36 | 68.43 | 73.00 | 67.14 |

**Table S1.** X-ray crystallography data collection and refinement statistics.

## 2.2 ADME Summary Tables

Table S2

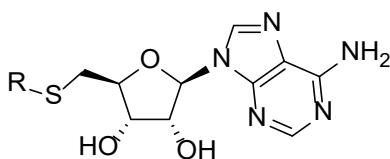

| Compound | R | nsp14<br>IC <sub>50</sub> / $\mu$ M | RNMT<br>IC <sub>50</sub> /<br>$\mu$ M | CHI-<br>logD | Mouse liver Mic<br>ML/min/g | Clint<br>T <sub>1/2</sub> / min |
|----------|---|-------------------------------------|---------------------------------------|--------------|-----------------------------|---------------------------------|
| 1        |   | 0.42 $\pm$ 0.3                      | > 100                                 | 1.2          | 1.0                         | > 30                            |
| 2        |   | 0.26 $\pm$ 0.07                     | > 100                                 | 1.6          | 1.4                         | > 30                            |
| 3        |   | 1.2 $\pm$ 0.15                      | > 100                                 | 1.6          | 2.6                         | 25.7                            |
| 4        |   | 6.1 $\pm$ 1.1                       | > 100                                 | 2.0          | 5.0                         | 13.2                            |
| 5        |   | 1.9 $\pm$ 0.30                      | > 100                                 | -0.2         | < 0.5                       | > 30                            |
| 6        |   | 0.31 $\pm$ 0.12                     | > 100                                 | 1.8          | 2.5                         | 26.9                            |
| 7        |   | 0.33 $\pm$ 0.09                     | > 100                                 | 1.3          | 2.0                         | > 30                            |
| 8        |   | 1.1 $\pm$ 0.07                      | > 100                                 | 1.7          | 1.4                         | > 30                            |
| 9        |   | 0.39 $\pm$ 0.06                     | 70.5                                  | 1.7          | 2.2                         | > 30                            |
| 10       |   | 0.36 $\pm$ 0.11                     | > 100                                 | 0.6          | 0.7                         | > 30                            |
| 11       |   | > 100                               | > 100                                 | 0.3          | < 0.5                       | > 30                            |
| 12       |   | 15 $\pm$ 12                         | 9.3                                   | 0.3          | -                           | -                               |

|           |                                                                                   |                 |       |     |       |      |
|-----------|-----------------------------------------------------------------------------------|-----------------|-------|-----|-------|------|
| <b>13</b> | 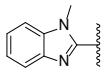 | $0.82 \pm 0.13$ | > 100 | 0.8 | 0.7   | > 30 |
| <b>14</b> |  | $0.67 \pm 0.02$ | > 100 | 1.0 | 0.5   | > 30 |
| <b>15</b> |  | $0.59 \pm 0.11$ | > 100 | 0.3 | < 0.5 | > 30 |
| <b>16</b> |  | $*79 \pm 18$    | > 100 | 0.7 | -     | -    |
| <b>17</b> |  | $6.9 \pm 4.6$   | 31.1  | 0.1 | 6.0   | 11.1 |

Table S3

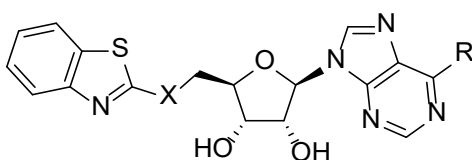

|           | X               | Y | R             | nsp14<br>IC <sub>50</sub> / $\mu$ M | RNMT<br>IC <sub>50</sub> / $\mu$ M | CHI-<br>logD | Mouse liver<br>T <sub>1/2</sub> / min |
|-----------|-----------------|---|---------------|-------------------------------------|------------------------------------|--------------|---------------------------------------|
| <b>1</b>  | O               | N | -             | $0.420 \pm 0.3$                     | > 100                              | 1.2          | > 30                                  |
| <b>26</b> | CH <sub>2</sub> | N | -             | $0.053 \pm 0.03$                    | > 100                              | 1.5          | > 30                                  |
| <b>27</b> | O               | C | H             | $0.055 \pm 0.02$                    | > 100                              | 1.6          | > 30                                  |
| <b>28</b> | CH <sub>2</sub> | C | H             | $0.308 \pm 0.34$                    | 22.8                               | 1.8          | > 30                                  |
| <b>29</b> | O               | C | CN            | $0.170 \pm 0.02$                    | > 100                              | 1.8          | 12.1                                  |
| <b>30</b> | O               | C | C $\equiv$ CH | $0.054 \pm 0.01$                    | > 100                              | 2.0          | 10.1                                  |
| <b>31</b> | O               | C | Et            | $0.250 \pm 0.2$                     | > 100                              | 2.1          | 3.9                                   |

Table S4

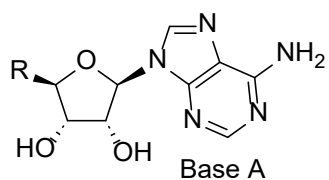

25, 32-33

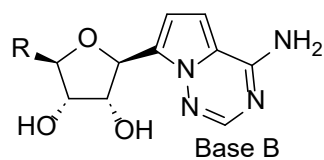

34-40

| #  | R | Base | CHI           | Mouse liver | Mic Clint                 |
|----|---|------|---------------|-------------|---------------------------|
|    |   |      | -<br>log<br>D | mL/min/g    | T <sub>1/2</sub> /<br>min |
| 25 |   | A    | 1.1           | 1.0         | > 30                      |
| 32 |   | A    | 1.5           | 1.0         | > 30                      |
| 33 |   | A    | 1.3           | < 0.5       | > 30                      |
| 34 |   | B    | 1.6           | 6.7         | 9.9                       |
| 35 |   | B    | 1.5           | 1.1         | > 30                      |
| 36 |   | B    | 1.9           | 3.7         | 18                        |
| 37 |   | B    | 2.2           | 4.9         | 13.6                      |
| 38 |   | B    | 1.7           | 1.2         | > 30                      |
| 39 |   | B    | 1.3           | 1.1         | > 30                      |
| 40 |   | B    | 1.5           | 0.8         | > 30                      |



## 2.3 Repeats in biochemical assays

Table S5 – repeat ‘n’ values for different compounds in stated biochemical assays

| Compound | SARS-CoV-2<br>nsp14 | NL63<br>nsp14 | 229E<br>nsp14 | RNMT |
|----------|---------------------|---------------|---------------|------|
| 1        | 11                  | 2             | 2             | 2    |
| 2        | 4                   | 2             | 2             | 2    |
| 3        | 2                   | -             | -             | 2    |
| 4        | 4                   | 2             | 2             | 2    |
| 5        | 3                   | -             | -             | 2    |
| 6        | 12                  | 2             | 2             | 2    |
| 7        | 11                  | 2             | 2             | 2    |
| 8        | 4                   | 2             | 2             | 2    |
| 9        | 4                   | 2             | 2             | 2    |
| 10       | 8                   | 2             | 2             | 2    |
| 11       | 4                   | 2             | 2             | 2    |
| 12       | 9                   | 2             | 2             | 2    |
| 13       | 5                   | 2             | 2             | 2    |
| 14       | 5                   | 2             | 2             | 2    |
| 15       | 9                   | 2             | 2             | 2    |
| 16       | 3                   | -             | -             | 2    |
| 17       | 4                   | 2             | 2             | 2    |
| 18       | 2                   | -             | -             | -    |
| 19       | 6                   | 2             | 2             | 2    |
| 20       | 7                   | 2             | 2             | 2    |
| 21       | 7                   | 2             | 2             | 2    |
| 22       | 3                   | -             | -             | 2    |
| 23       | 2                   | -             | -             | 2    |
| 24       | 2                   | -             | -             | 2    |
| 25       | 10                  | 2             | 2             | 2    |
| 26       | 18                  | 2             | 2             | 2    |
| 27       | 9                   | 2             | 2             | 2    |
| 28       | 4                   | 2             | 2             | 2    |
| 29       | 4                   | 2             | 2             | 2    |
| 30       | 8                   | 2             | 2             | 2    |
| 31       | 4                   | 2             | 2             | 2    |
| 32       | 10                  | 2             | 2             | 2    |
| 33       | 6                   | 2             | 2             | 2    |
| 34       | 10                  | 2             | 2             | 2    |
| 35       | 8                   | 2             | 2             | 2    |
| 36       | 2                   | -             | -             | 2    |
| 37       | 2                   | -             | -             | 2    |
| 38       | 2                   | -             | -             | 2    |
| 39       | 8                   | 2             | 2             | 2    |
| 40       | 8                   | 2             | 2             | 2    |

## 2.4 MERS AlphaFold2 model

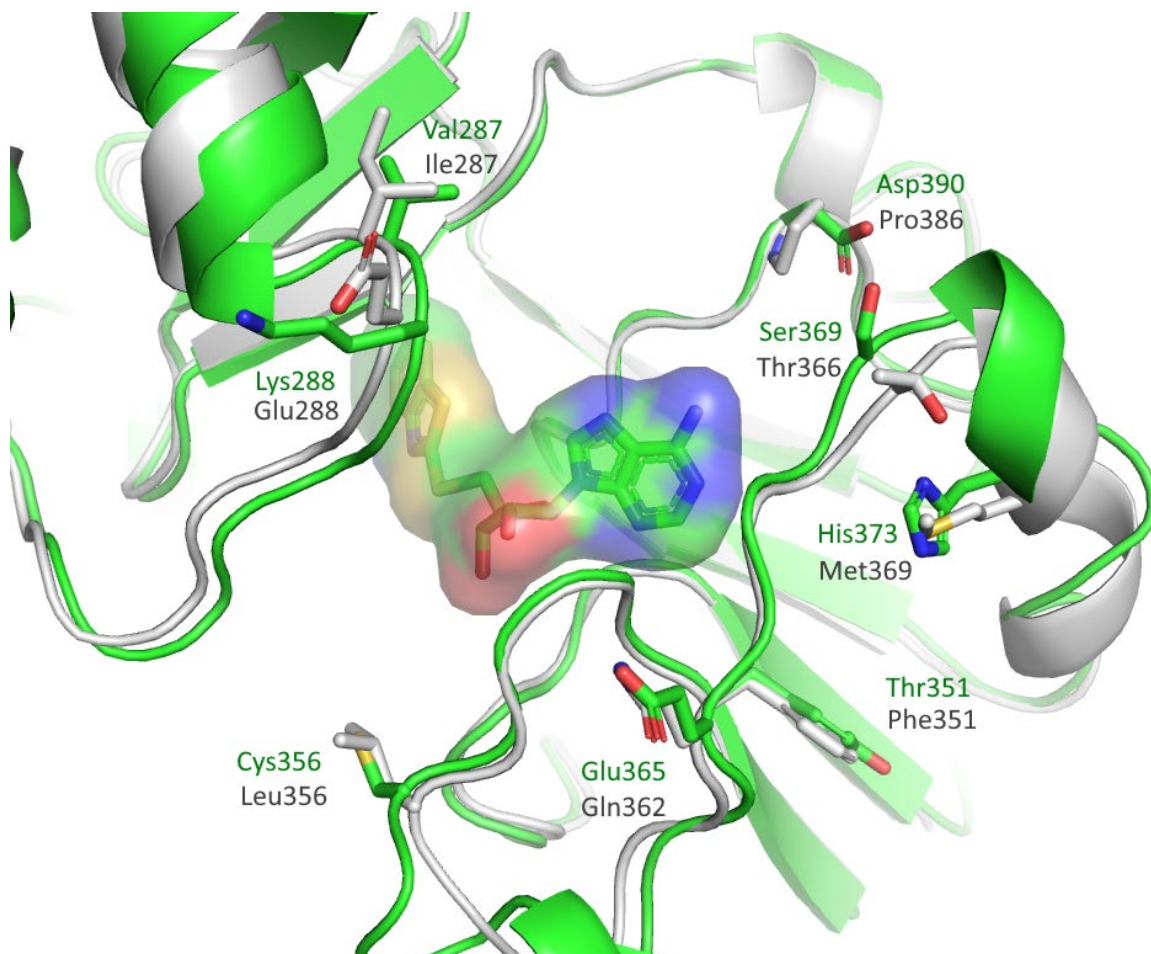

**Figure S1** Compound **1** bound to SARS-CoV-2 nsp14 (9s0m, green carbons) superimposed onto a MERS nsp14 AlphaFold2 model (grey carbons). Residues that differ between SARS-CoV-2 nsp14 (green) and MERS nsp14 (grey) in the proximity of the ligand **1** binding site are indicated.

## 2.5 RNMT structure overlay with SARS-CoV-2 nsp14 in complex with compound 1

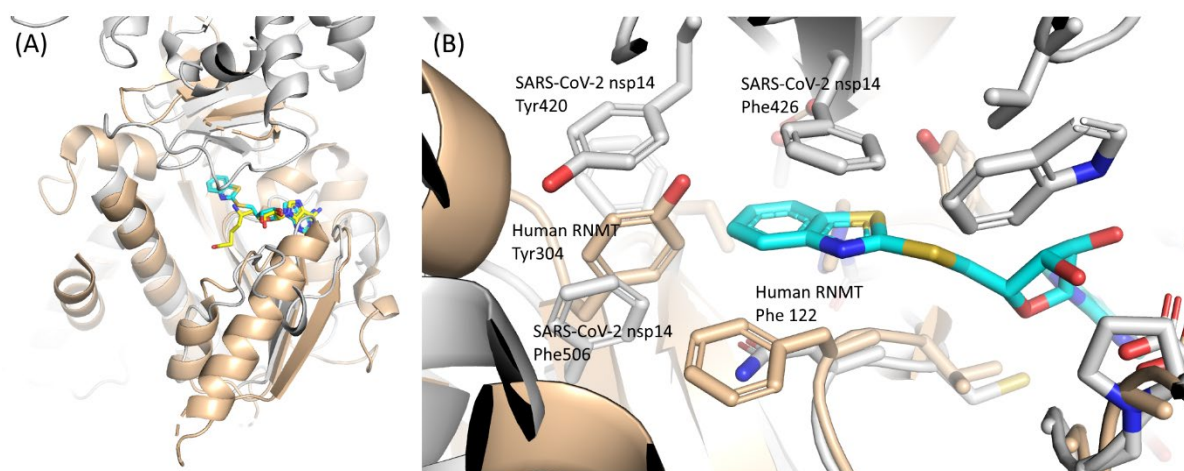

**Figure S2** (A) Overlay of Human RNMT (wheat cartoon, pdb code: 3EPP) bound to sinefungin (yellow sticks) and SARS-CoV-2 nsp14 (grey cartoon) bound to compound **1** (cyan sticks). (B) Details of the benzothiazole binding pocket highlighting some of the differences between RNMT and SARS-CoV-2 nsp14.

## 2.6 Substrate competition experiments with compound 26

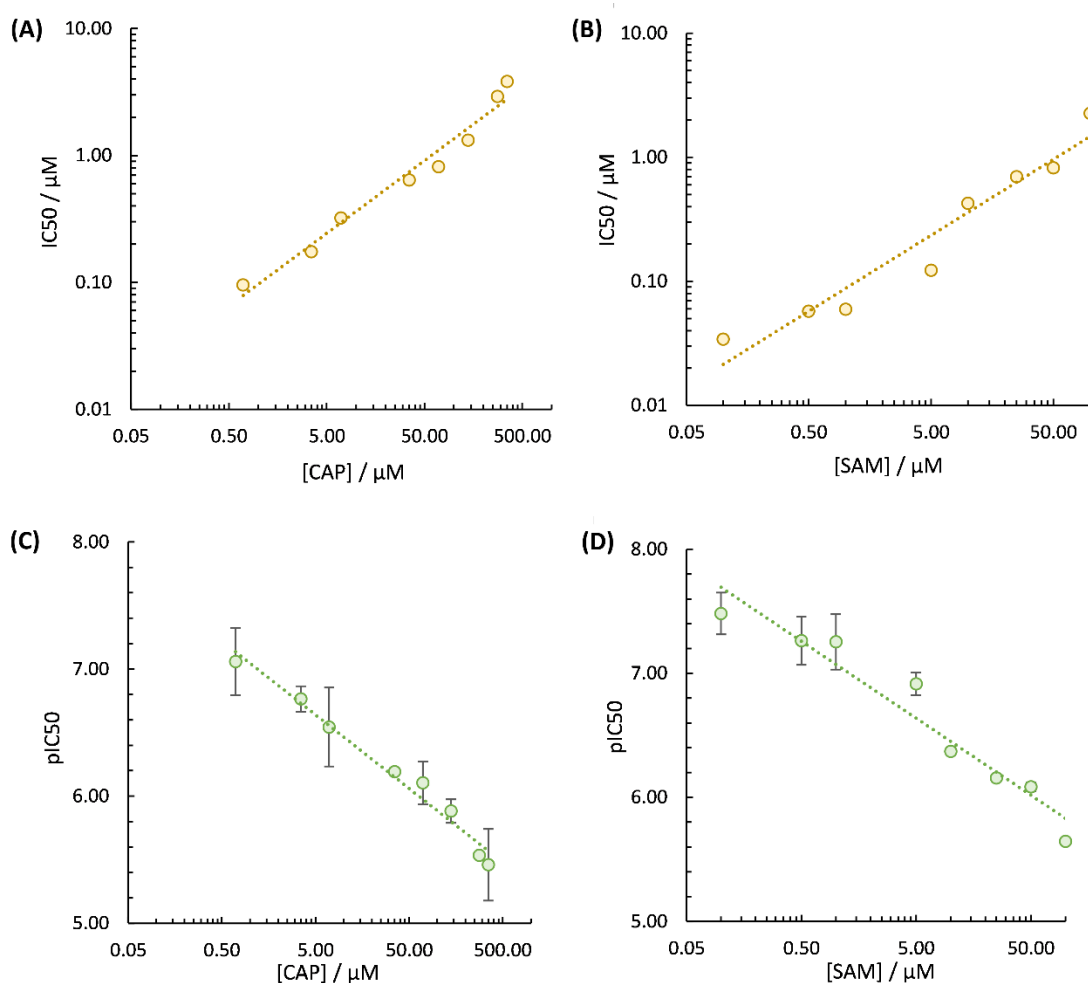

**Figure S3** Competition of compound **26** with substrates CAP RNA and SAM. (A) Change in  $IC_{50}$  of compound **26** with [SAM] at 10  $\mu M$  (10-fold  $K_m$ ) and varying the CAP RNA concentration. (B) Change in  $IC_{50}$  of compound **26** with [CAP] at 7.0  $\mu M$  (10-fold  $K_m$ ) and varying the SAM concentration. (C) and (D) The same data is shown as  $pIC_{50}$  values (green markers) with standard deviations (n=2). Dotted lines show line of best fit to data.

## 2.7 Comparison of electron densities

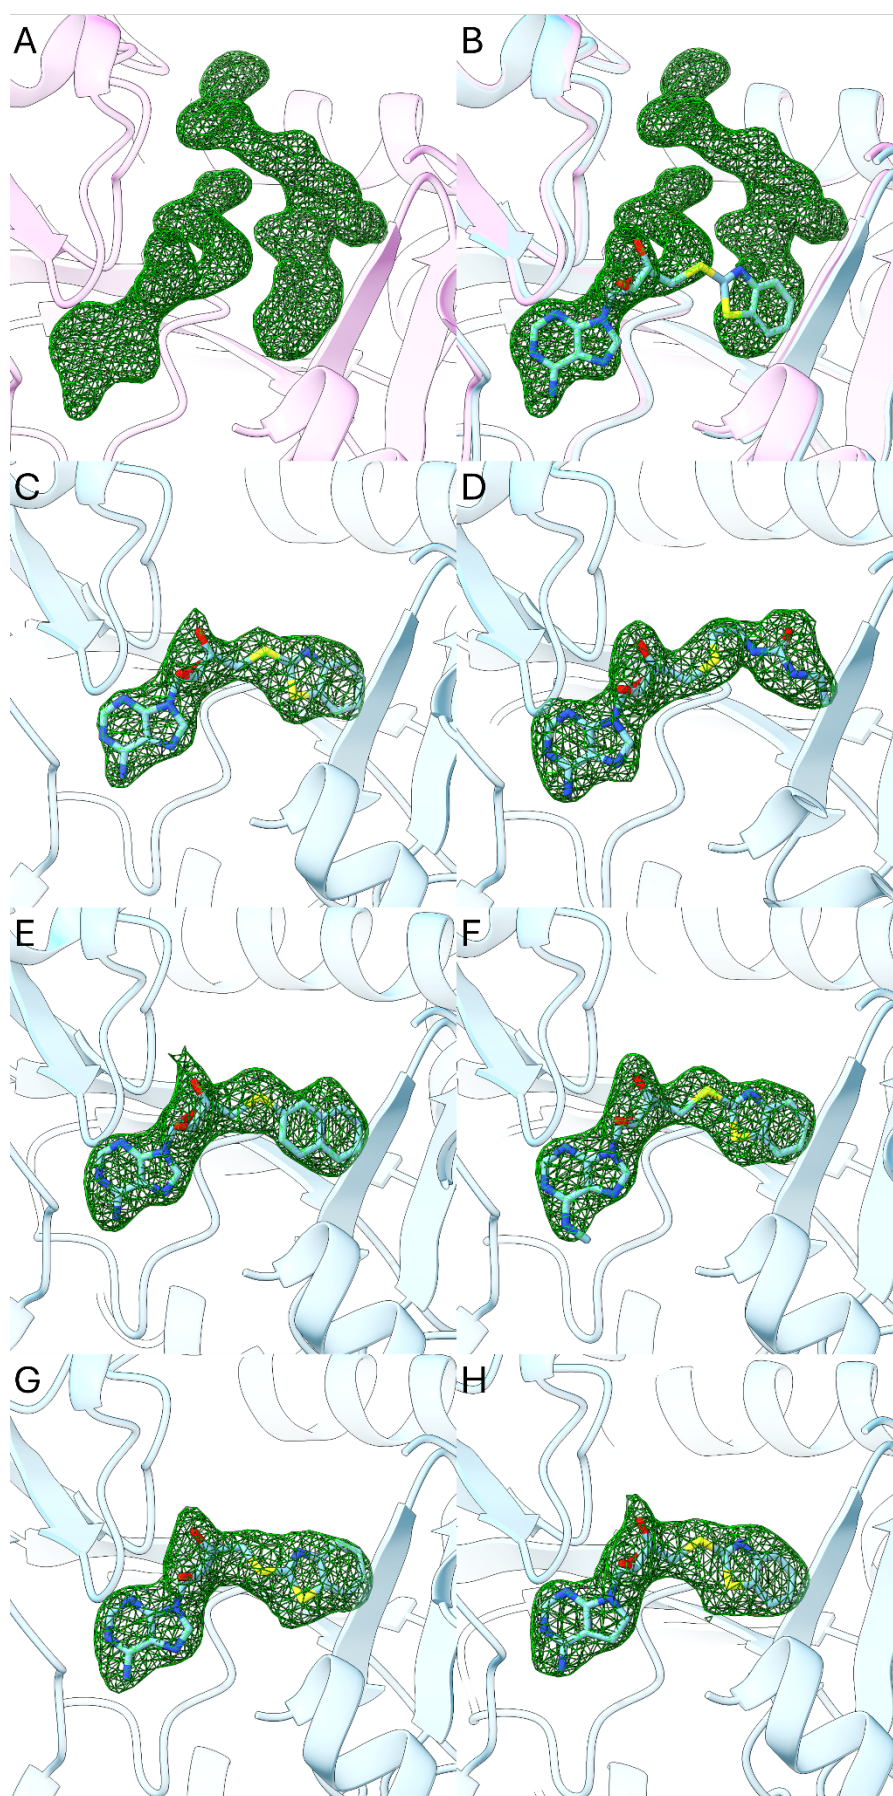

**Figure S4** mFo-DFc omit maps for the proprietary ligand and the ligands described in this study, calculated after refinement with the corresponding ligand removed from the model and showed as green density contoured at  $+3.0\sigma$ . (A) Omit map of the proprietary ligand used for back-soaking (pink). (B) Same map as in (A) with compound 1 overlaid for reference (blue). (C - H) Omit maps for the ligands reported in the manuscript, compounds **1**, **5**, **6**, **18**, **26**, **27** respectively. The more compact and distinct omit density for the ligands in panels (C - H) contrasts with the density of the proprietary ligand in panels (A - B).

## 3 Appendix

### 3.1 QC Spectra for Compounds

<sup>1</sup>H NMR 9-[(2*R*,3*R*,4*R*,5*R*)-3,4-Bis[[tert-butyl(dimethyl)silyl]oxy]-5-[[tert-butyl(dimethyl)silyl]oxymethyl]tetrahydrofuran-2-yl]purin-6-amine (**42**)

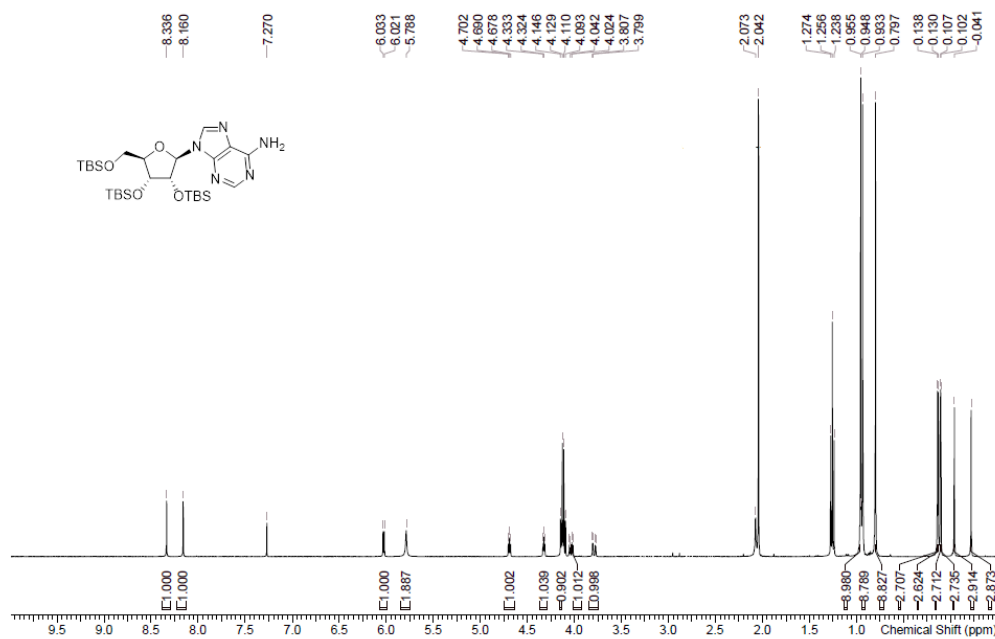

LCMS 9-[(2*R*,3*R*,4*R*,5*R*)-3,4-Bis[[tert-butyl(dimethyl)silyl]oxy]-5-[[tert-butyl(dimethyl)silyl]oxymethyl]tetrahydrofuran-2-yl]purin-6-amine (**42**)

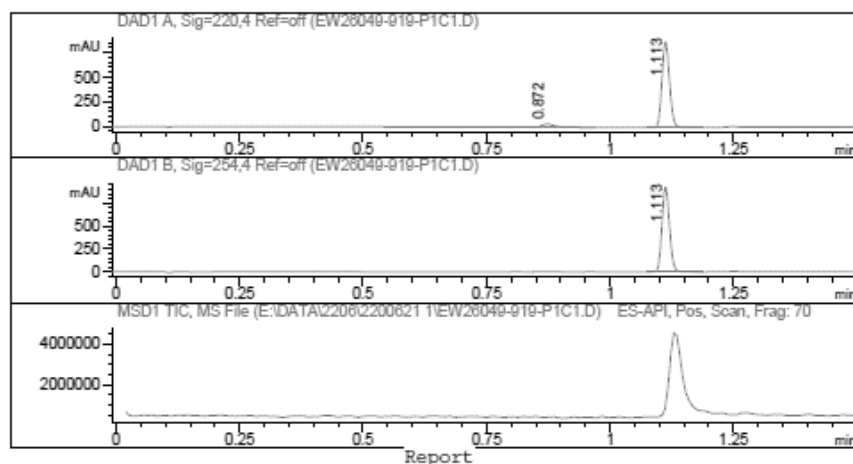

Report

Signal 1 : DAD1 A, Sig=220,4 Ref=off

| # | Meas. | Ret.  | Height  | Width | Area    | Area % |
|---|-------|-------|---------|-------|---------|--------|
| 1 |       | 0.872 | 31.677  | 0.030 | 66.044  | 6.676  |
| 2 |       | 1.113 | 871.994 | 0.016 | 923.297 | 93.324 |

Signal 2 : DAD1 B, Sig=254,4 Ref=off

| # | Meas. | Ret.  | Height  | Width | Area    | Area %  |
|---|-------|-------|---------|-------|---------|---------|
| 1 |       | 1.113 | 928.441 | 0.016 | 978.312 | 100.000 |

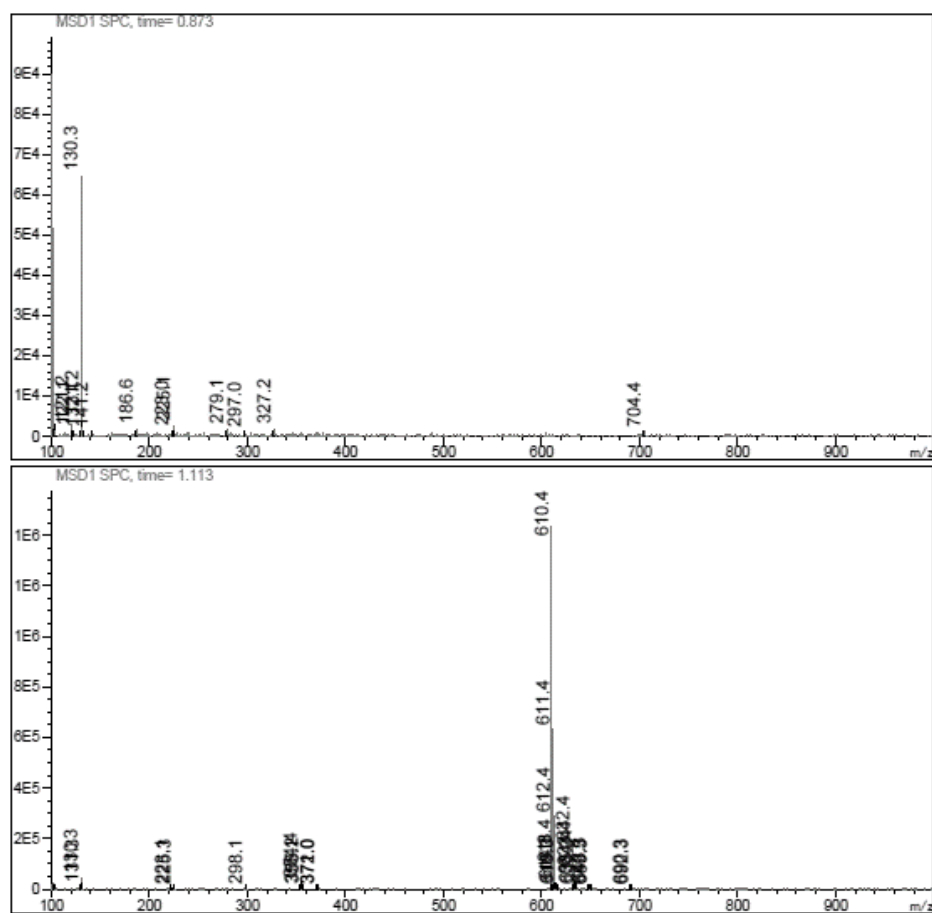



**<sup>1</sup>H NMR [(2*R*,3*R*,4*R*,5*R*)-5-(6-Aminopurin-9-yl)-3,4-bis[[tert-butyl(dimethyl)silyl]oxy] tetrahydrofuran-2-yl] methanol (43)**

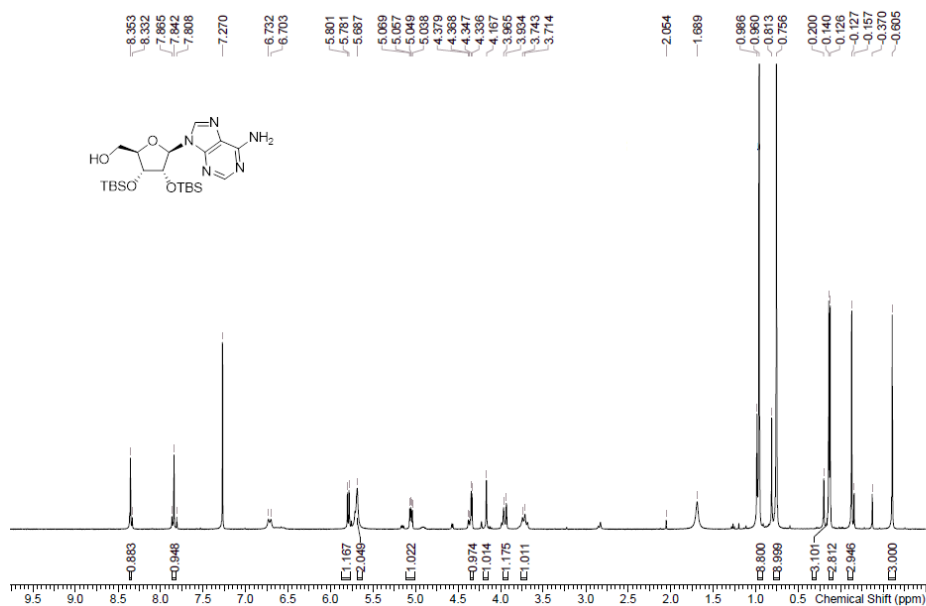

**LCMS [(2*R*,3*R*,4*R*,5*R*)-5-(6-Aminopurin-9-yl)-3,4-bis[[tert-butyl(dimethyl)silyl]oxy] tetrahydrofuran-2-yl]methanol (43)**

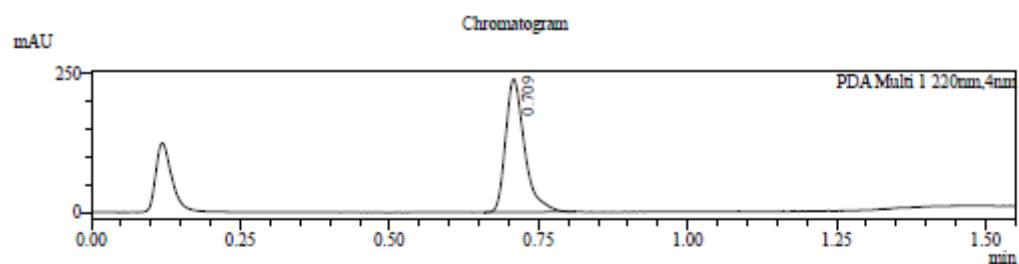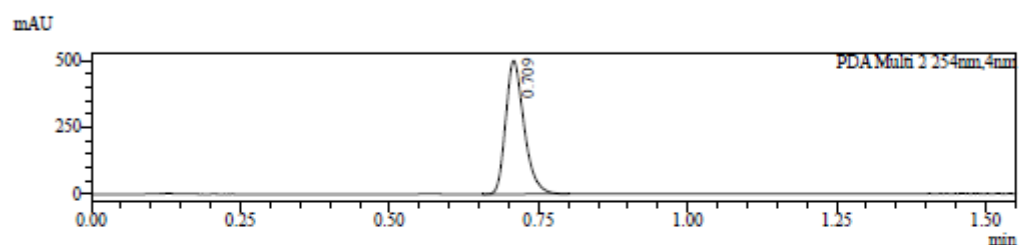

1 PDA Multi 1 / 220nm, 4nm  
2 PDA Multi 2 / 254nm, 4nm

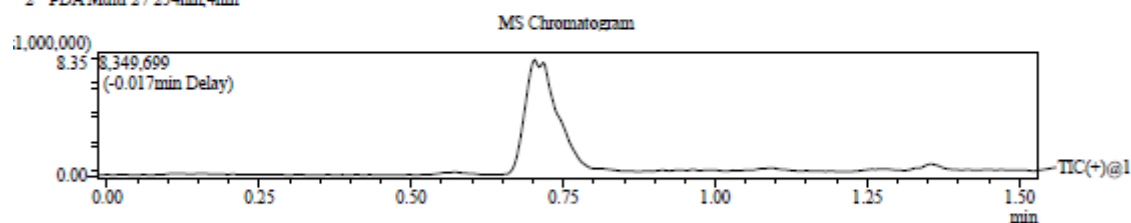

#### Integration Result

##### Peak Table

| Peak# | Ret. Time | Height | Height% | USP Width | Area   | Area%   |
|-------|-----------|--------|---------|-----------|--------|---------|
| 1     | 0.709     | 239309 | 100.000 | 0.057     | 531891 | 100.000 |

##### Peak Table

| Peak# | Ret. Time | Height | Height% | USP Width | Area    | Area%   |
|-------|-----------|--------|---------|-----------|---------|---------|
| 1     | 0.709     | 499610 | 100.000 | 0.056     | 1076670 | 100.000 |

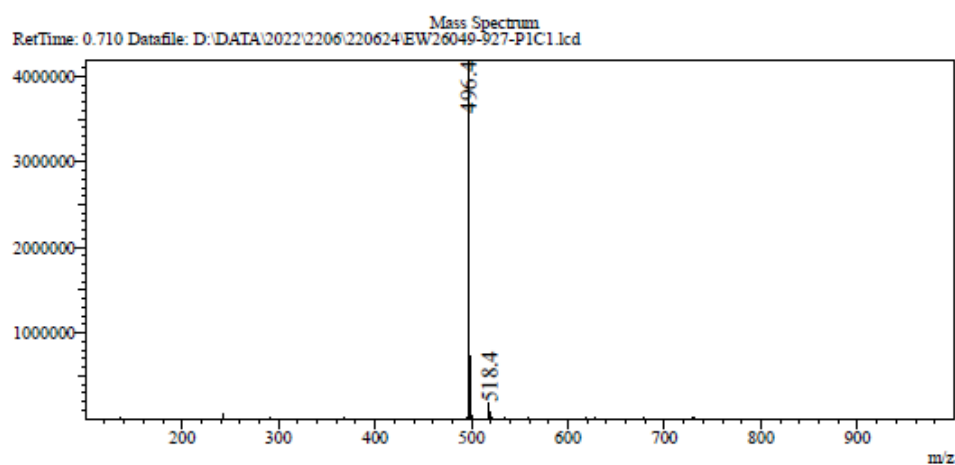

<sup>1</sup>H NMR [(2*R*,3*R*,4*R*,5*R*)-5-(6-Aminopurin-9-yl)-3,4-bis[[tert-butyl(dimethyl)silyl] oxy] tetrahydrofuran-2-yl)methyl methanesulfonate (**44**)

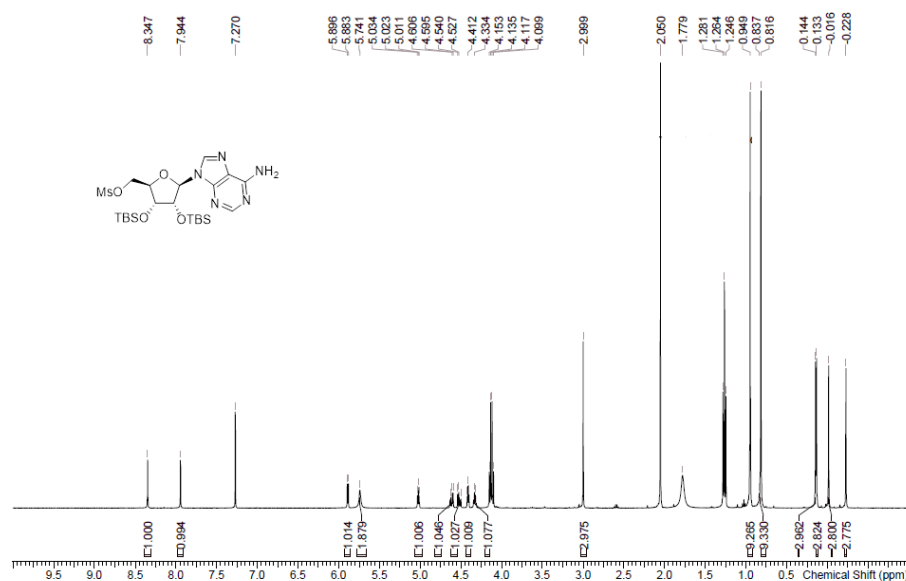

**LCMS [(2*R*,3*R*,4*R*,5*R*)-5-(6-Aminopurin-9-yl)-3,4-bis[[*tert*-butyl(dimethyl)silyl] oxy] tetrahydrofuran-2-yl)methyl methanesulfonate (**44**)**

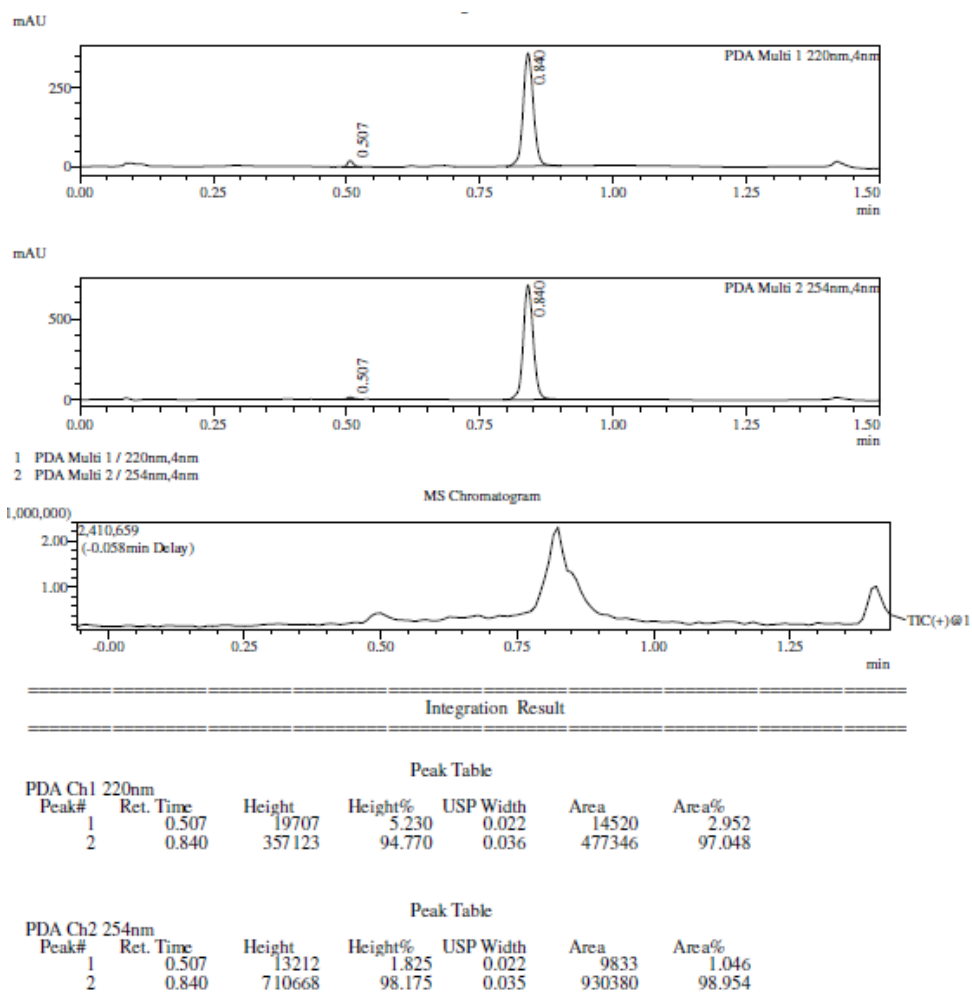

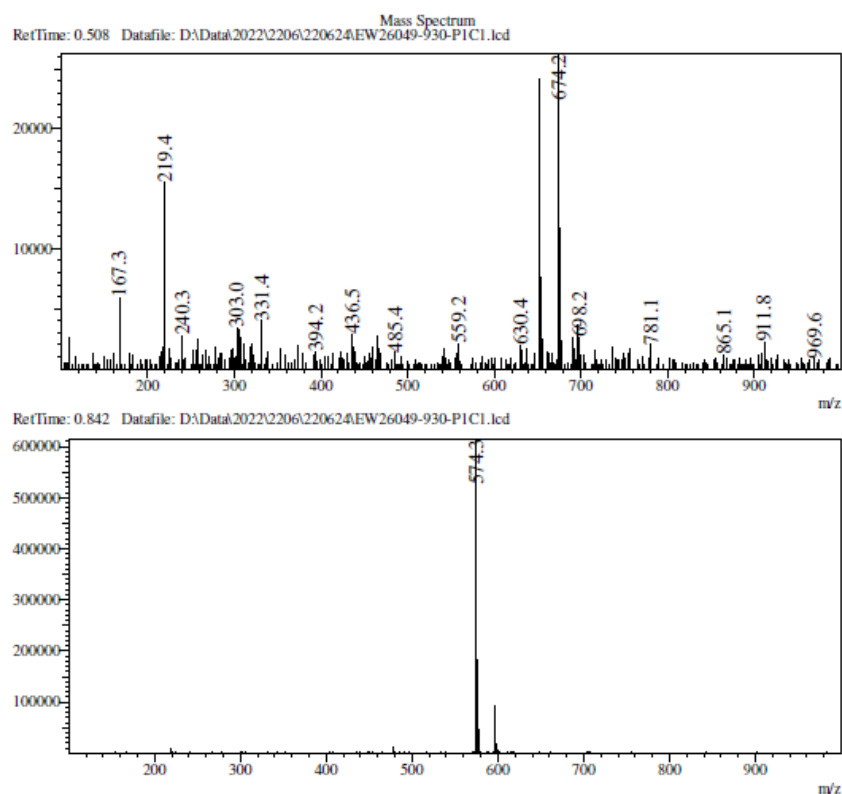

**LCMS 9-[(2*R*,3*R*,4*R*,5*S*)-5-(1,3-Benzothiazol-2-ylsulfanylmethyl)-3,4-bis[[*tert*-butyl (dimethyl)silyl]oxy]tetrahydrofuran-2-yl]purin-6-amine (**45a**)**

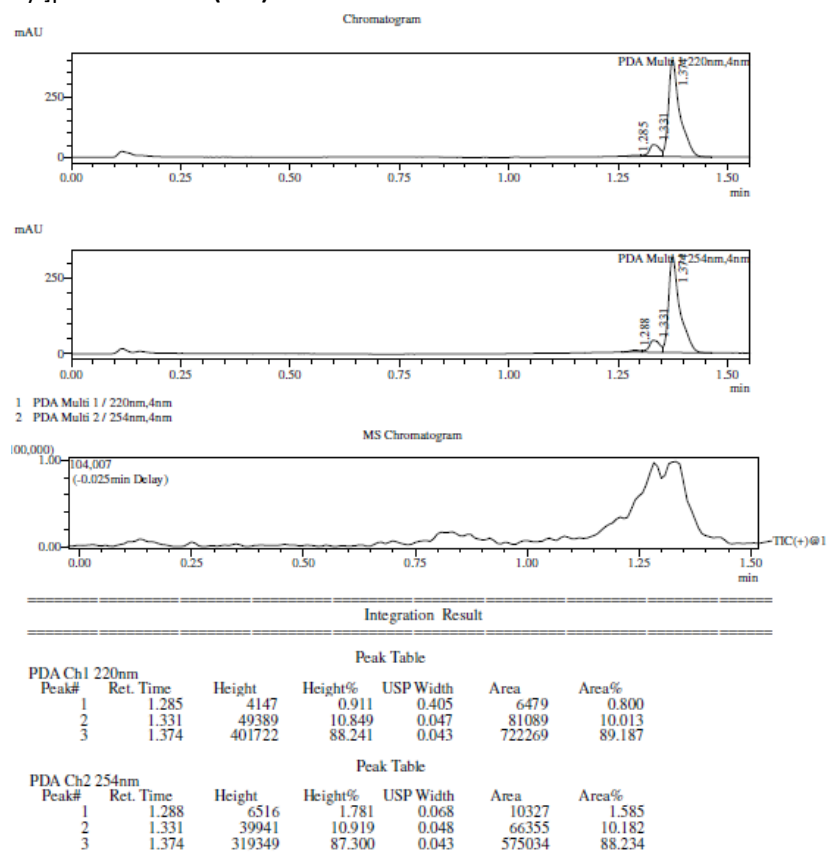

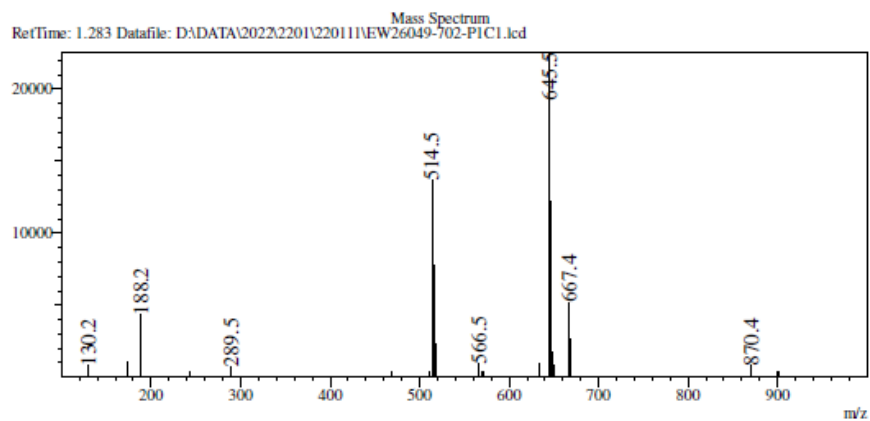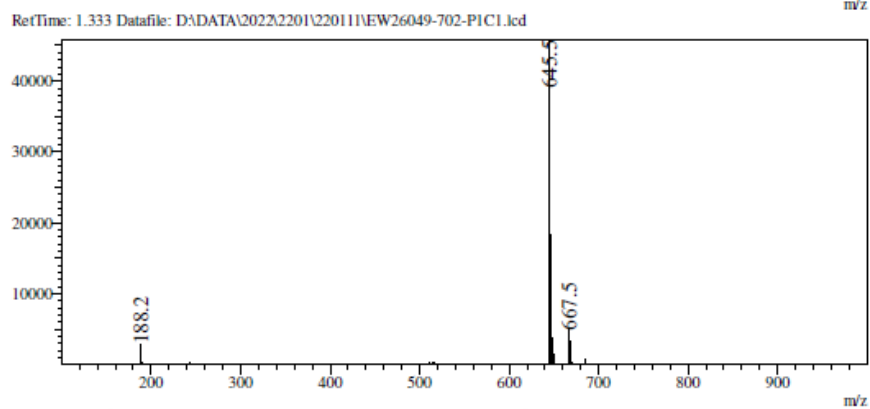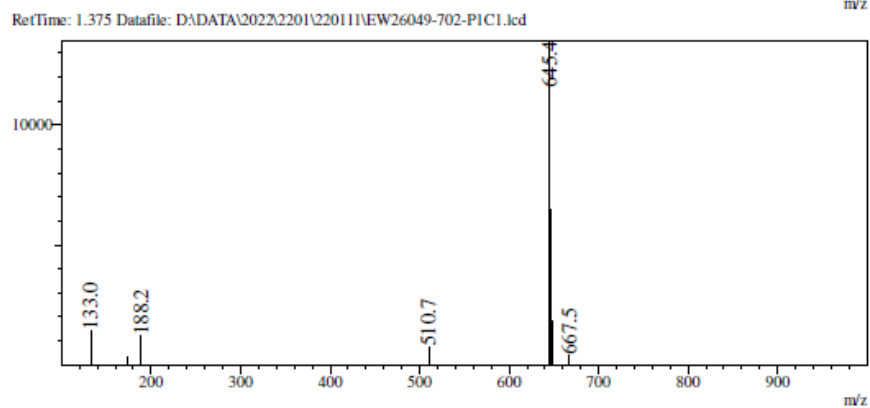

**<sup>1</sup>H NMR** 9-[(2*R*,3*R*,4*R*,5*S*)-3,4-Bis[[*tert*-butyl(dimethyl)silyl]oxy]-5-[(6-methyl-1,3-benzothiazol-2-yl)sulfanylmethyl] tetrahydrofuran-2-yl]purin-6-amine (**45b**)

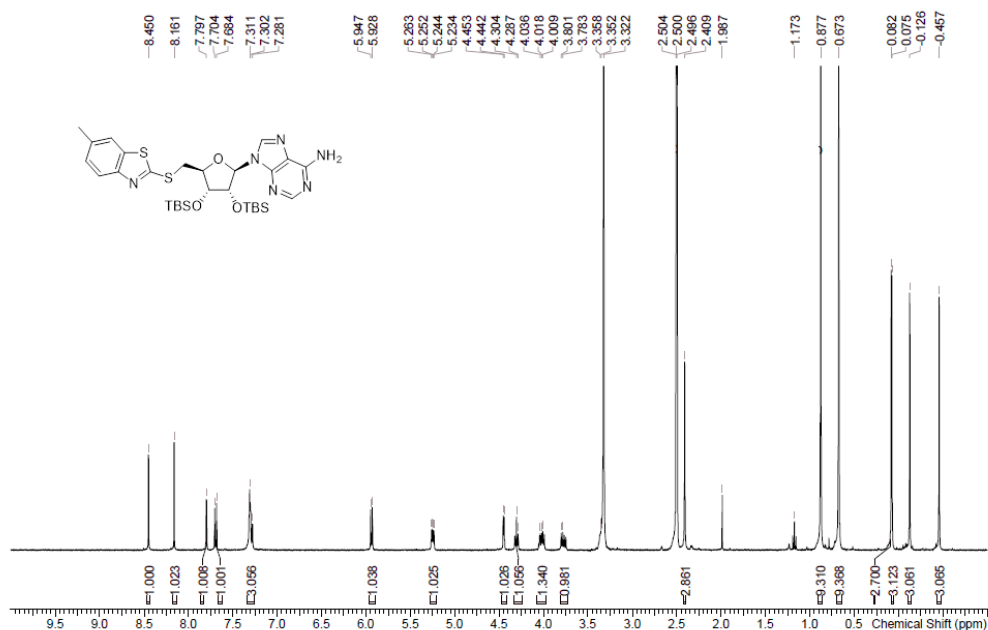

**LCMS** 9-[(2*R*,3*R*,4*R*,5*S*)-3,4-Bis[[*tert*-butyl(dimethyl)silyl]oxy]-5-[(6-methyl-1,3-benzothiazol-2-yl)sulfanylmethyl] tetrahydrofuran-2-yl]purin-6-amine (**45b**)

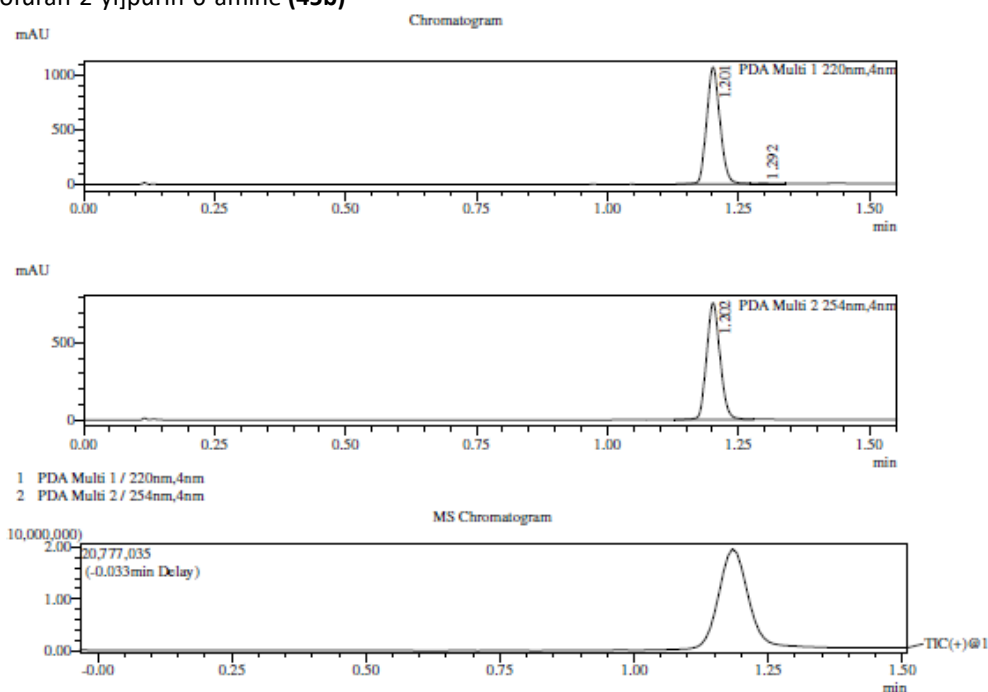

Integration Result

Peak Table

| Peak# | Ret. Time | Height  | Height% | USP Width | Area    | Area%  |
|-------|-----------|---------|---------|-----------|---------|--------|
| 1     | 1.201     | 1071362 | 99.630  | 0.049     | 1905861 | 99.448 |
| 2     | 1.292     | 3975    | 0.370   | 0.080     | 10573   | 0.552  |

Peak Table

| Peak# | Ret. Time | Height | Height% | USP Width | Area    | Area%   |
|-------|-----------|--------|---------|-----------|---------|---------|
| 1     | 1.202     | 760491 | 100.000 | 0.049     | 1363581 | 100.000 |

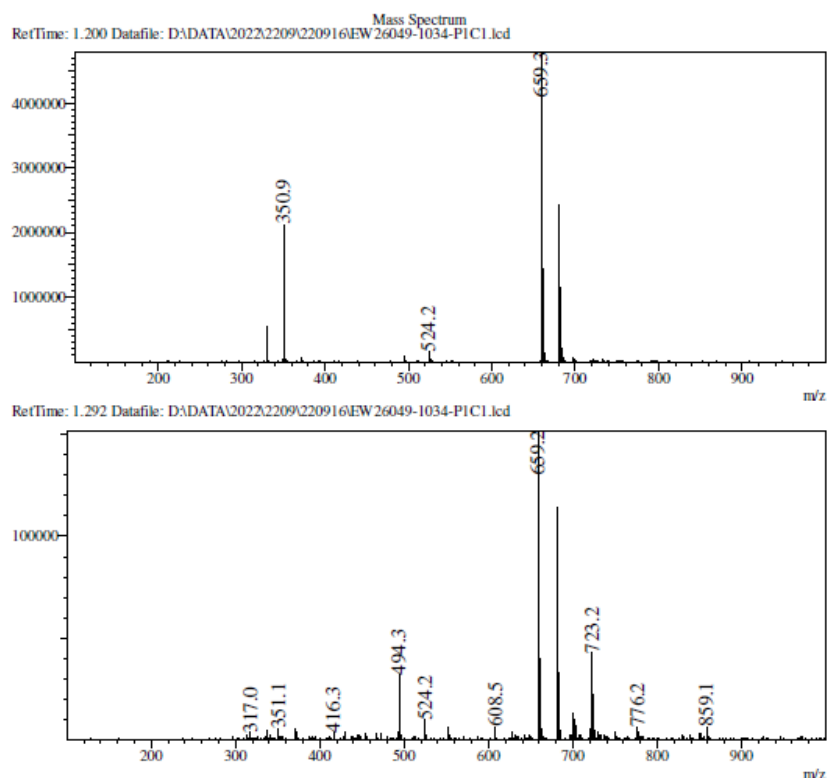

**LCMS** 9-[(2*R*,3*R*,4*R*,5*S*)-3,4-bis[[*tert*-butyl(dimethyl)silyl]oxy]-5- [(5-methyl-1,3-benzothiazol-2-yl)sulfanylmethyl] tetrahydrofuran-2-yl]purin-6-amine (**45c**)

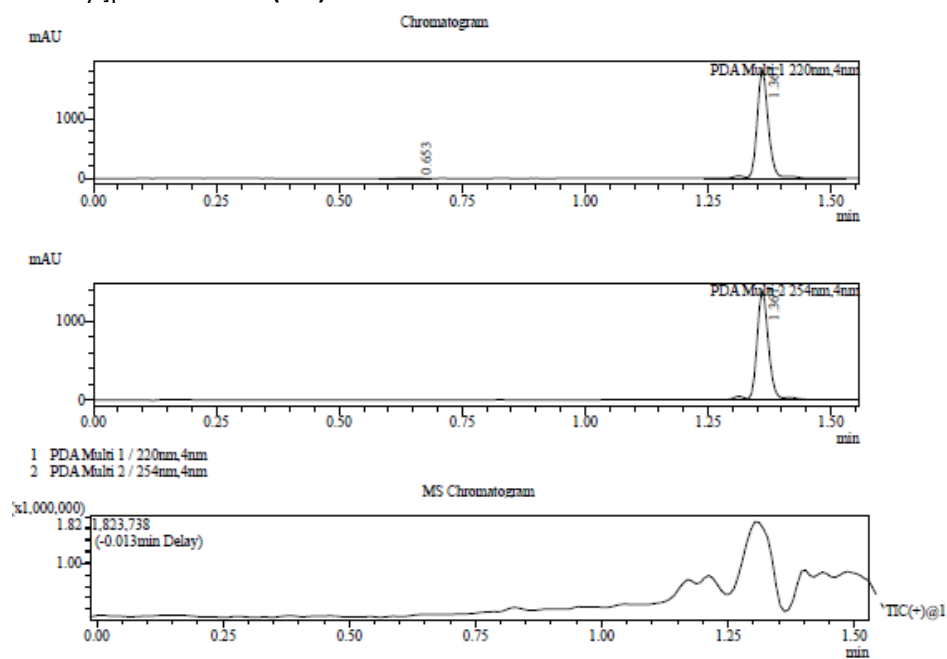

| Integration Result |           |         |         |           |         |         |
|--------------------|-----------|---------|---------|-----------|---------|---------|
| Peak Table         |           |         |         |           |         |         |
| PDA Ch1 220nm      |           |         |         |           |         |         |
| Peak#              | Ret. Time | Height  | Height% | USP Width | Area    | Area%   |
| 1                  | 0.653     | 2093    | 0.113   | 0.096     | 5952    | 0.203   |
| 2                  | 1.361     | 1853171 | 99.887  | 0.048     | 2928174 | 99.797  |
| Peak Table         |           |         |         |           |         |         |
| PDA Ch2 254nm      |           |         |         |           |         |         |
| Peak#              | Ret. Time | Height  | Height% | USP Width | Area    | Area%   |
| 1                  | 1.361     | 1401706 | 100.000 | 0.049     | 2307954 | 100.000 |

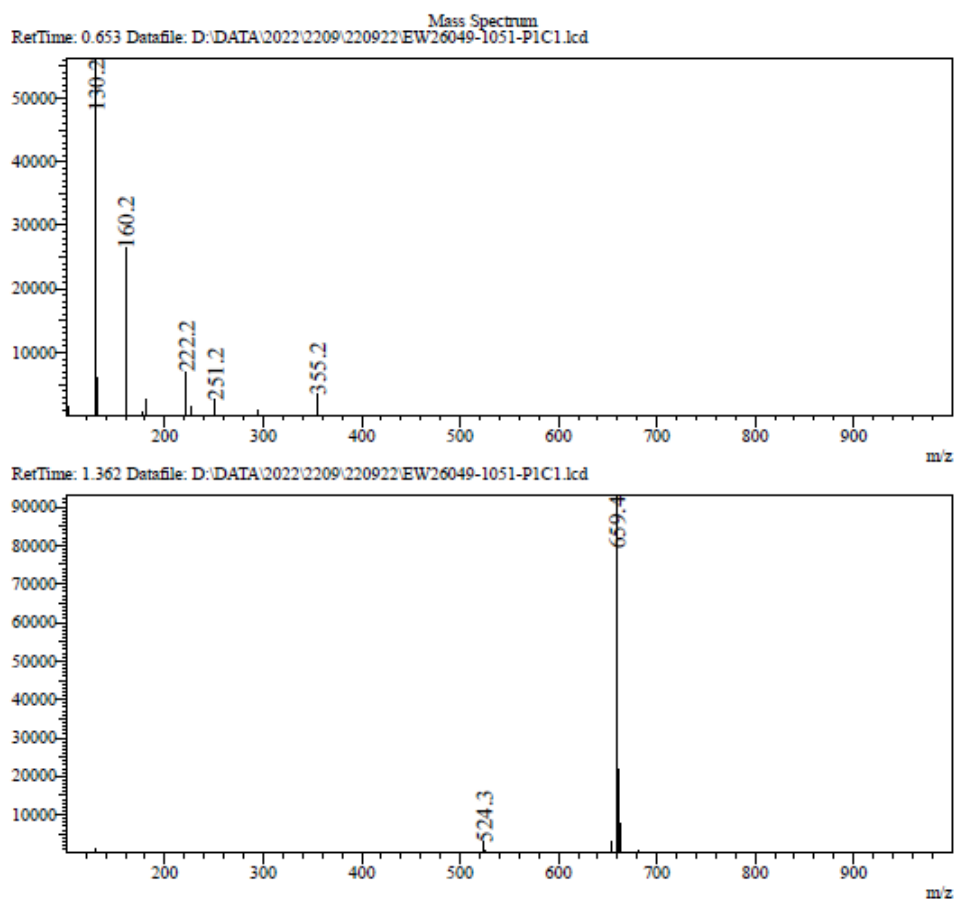

**<sup>1</sup>H NMR** 9-[(2*R*,3*R*,4*R*,5*S*)-3,4-bis[[*tert*-butyl(dimethyl)silyl]oxy]-5-(2-quinolylsulfanylmethyl) tetrahydrofuran-2-yl]purin-6-amine (**45d**)

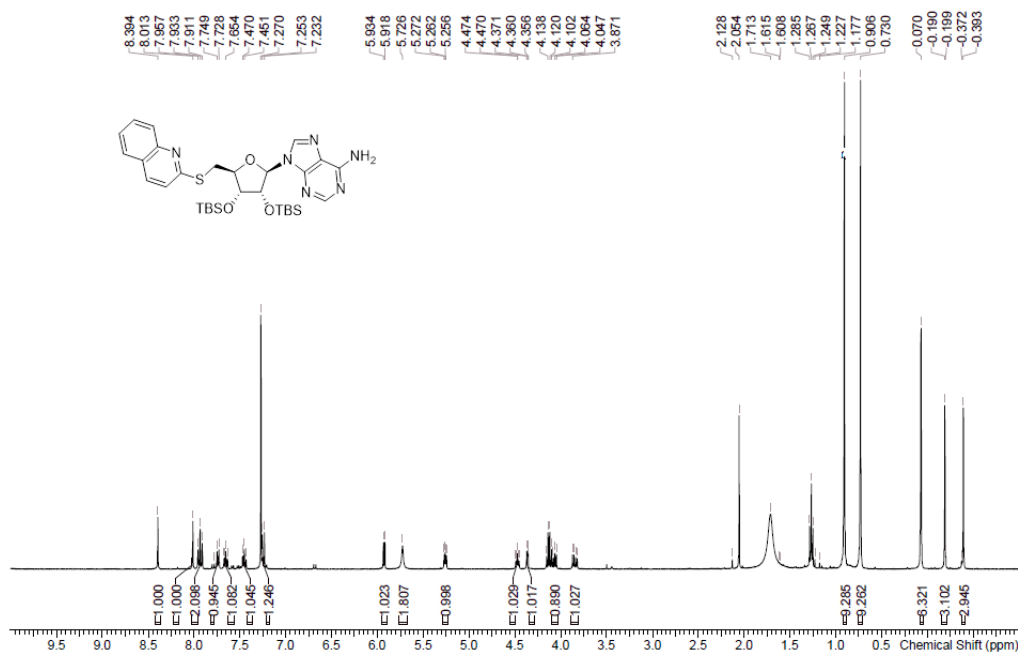

**LCMS** 9-[(2*R*,3*R*,4*R*,5*S*)-3,4-Bis[[*tert*-butyl(dimethyl)silyl]oxy]-5- [(6-methyl-2-quinolyl) sulfanylmethyl]



tetrahydrofuran-2-yl]purin-6-amine (**45e**)

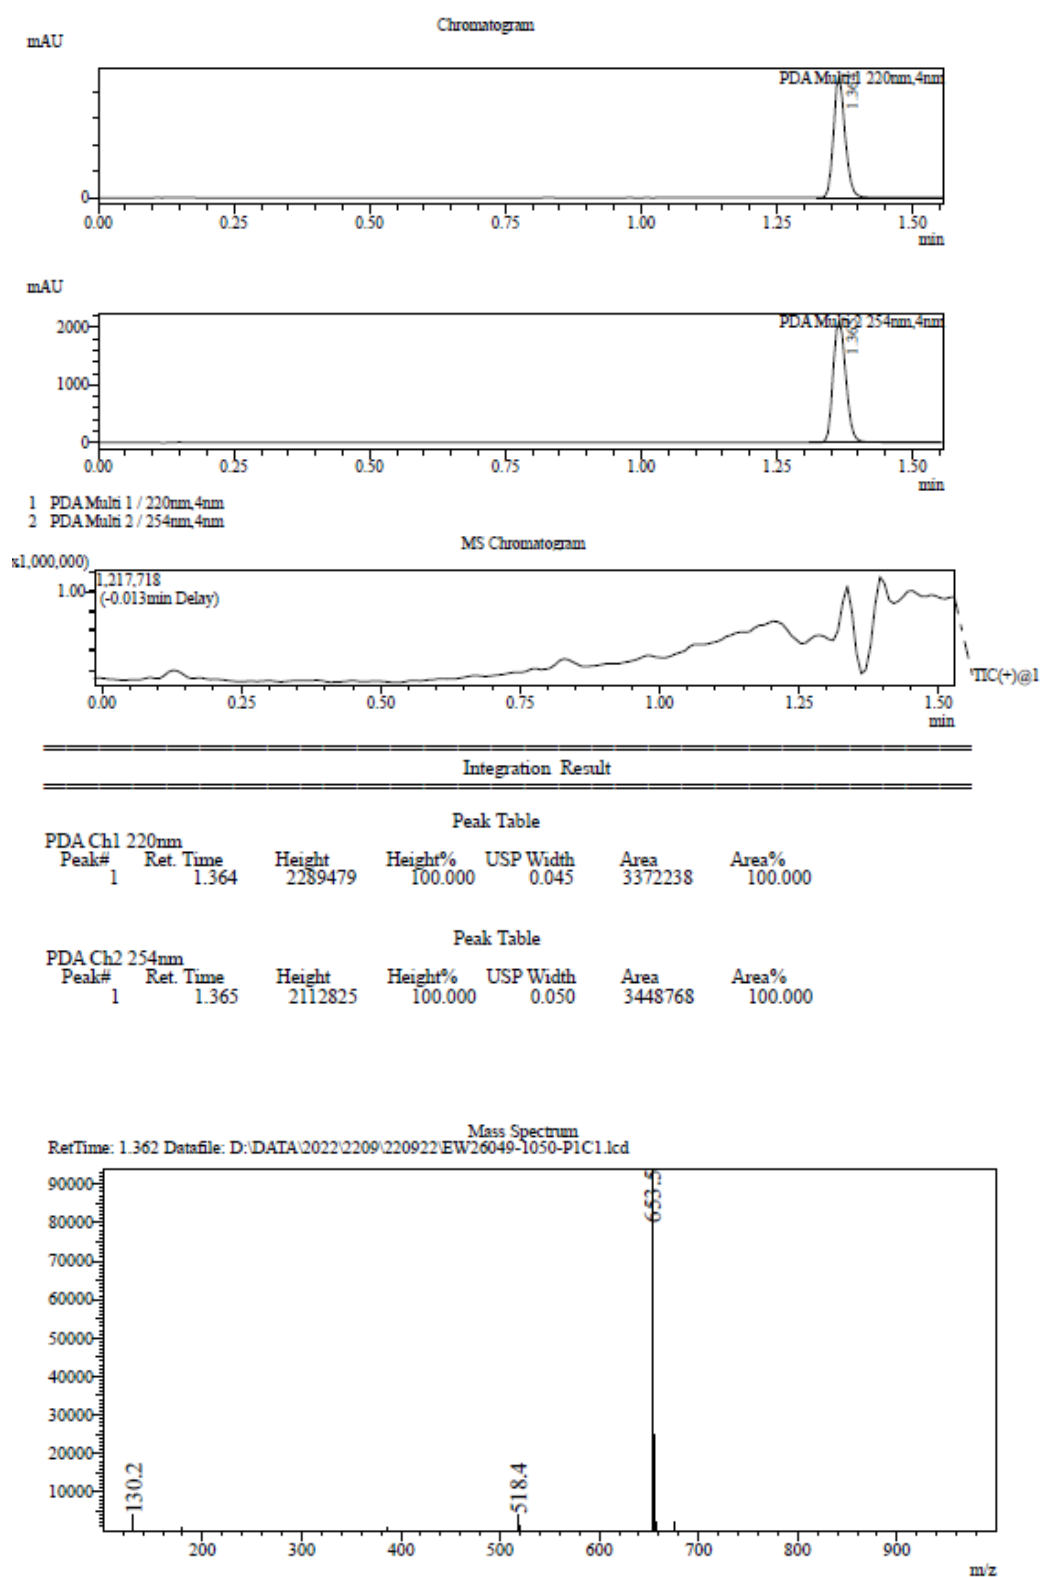

**LCMS 9-[(2*R*,3*R*,4*R*,5*S*)-3,4-Bis[[*tert*-butyl(dimethyl)silyl]oxy]-5-[(7-methyl-2-quinolyl)sulfanyl methyl]tetrahydrofuran-2-yl]purin-6-amine (**45f**)**

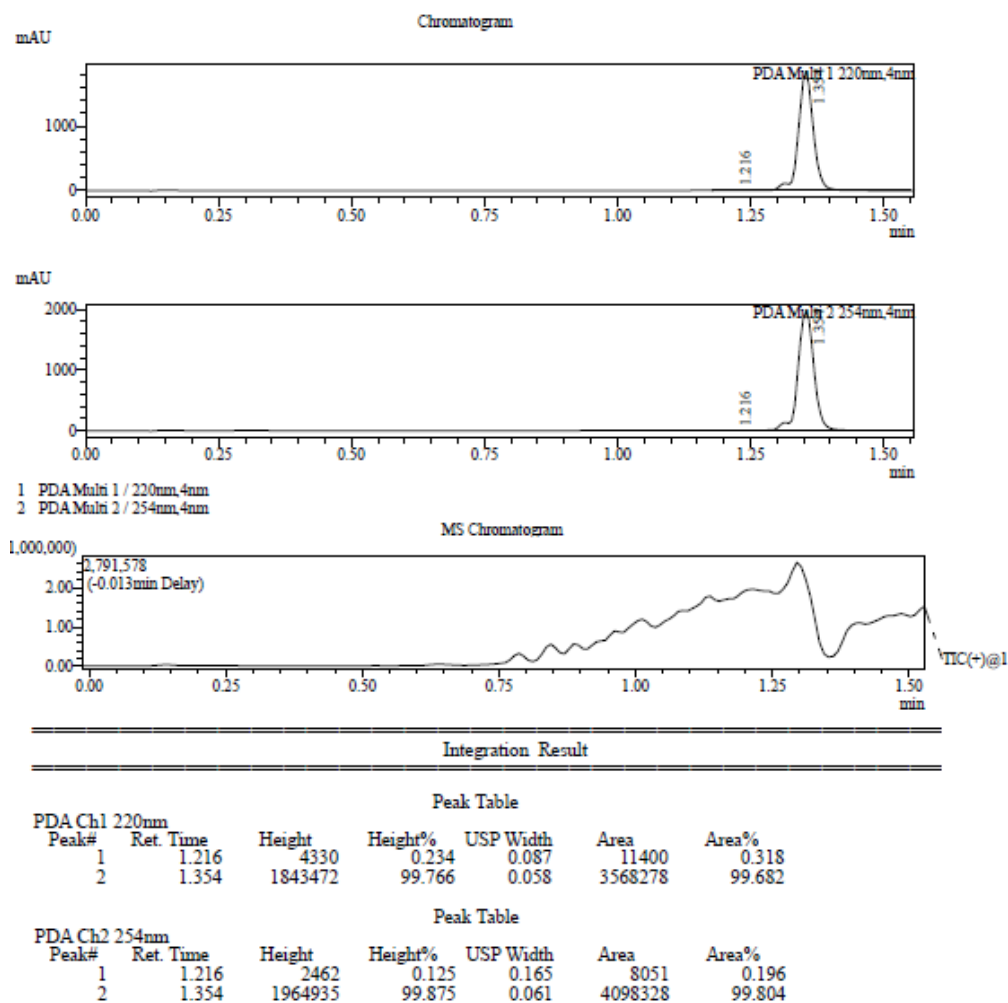

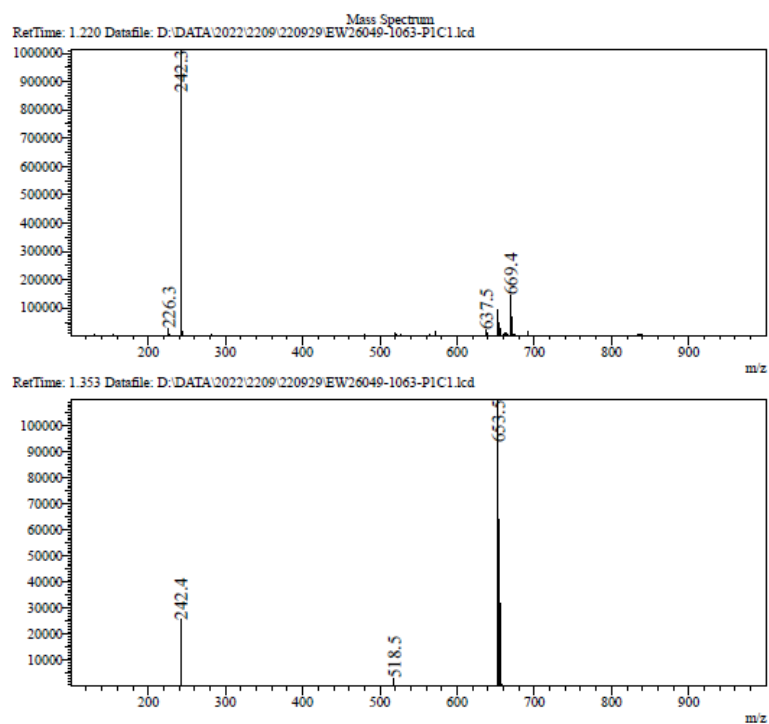

**<sup>1</sup>H NMR** 9-((2R,3R,4R,5S)-3,4-Bis((tert-butyldimethylsilyl)oxy)-5-((quinolin-7-ylthio)methyl) tetrahydrofuran-2-yl)-9H-purin-6-amine (**45g**)

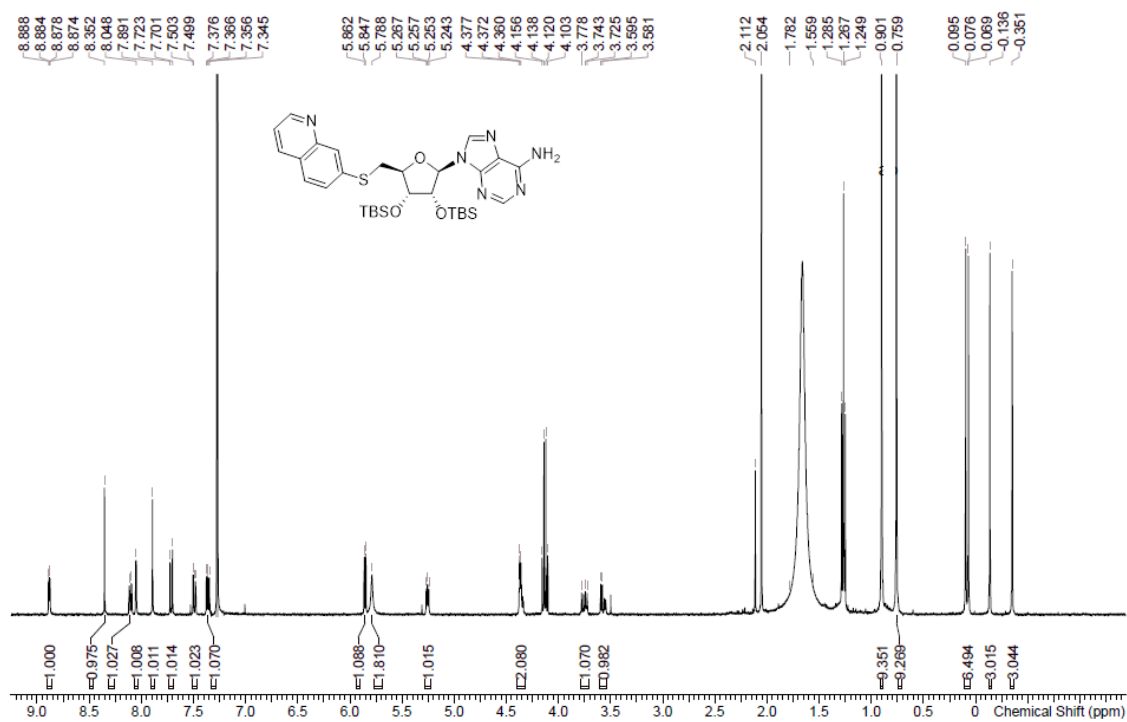

**LCMS** 9-((2R,3R,4R,5S)-3,4-Bis((tert-butyldimethylsilyl)oxy)-5-((quinolin-7-ylthio)methyl) tetrahydrofuran-2-yl)-9H-purin-6-amine (**45g**)

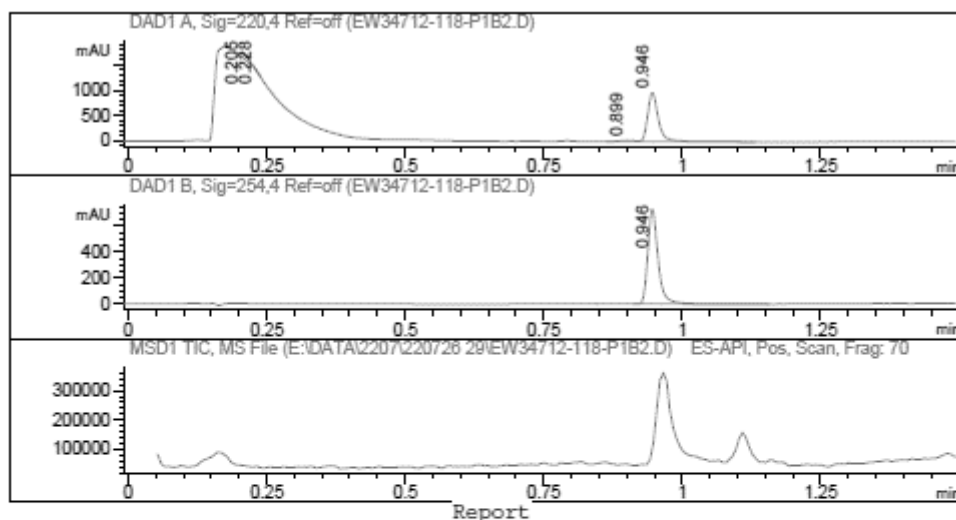

```
=====
```

| Signal 1 : DAD1 A, Sig=220,4 Ref=off |            |         |       |          |        |
|--------------------------------------|------------|---------|-------|----------|--------|
| #                                    | Meas. Ret. | Height  | Width | Area     | Area % |
| 1                                    | 0.205      | 56.491  | 0.020 | 71.408   | 5.091  |
| 2                                    | 0.228      | 21.645  | 0.007 | 8.642    | 0.616  |
| 3                                    | 0.899      | 18.134  | 0.028 | 33.545   | 2.392  |
| 4                                    | 0.946      | 964.954 | 0.021 | 1289.056 | 91.901 |

```
-----
```

| Signal 2 : DAD1 B, Sig=254,4 Ref=off |            |         |       |         |         |
|--------------------------------------|------------|---------|-------|---------|---------|
| #                                    | Meas. Ret. | Height  | Width | Area    | Area %  |
| 1                                    | 0.946      | 728.104 | 0.020 | 940.752 | 100.000 |

```
-----
```

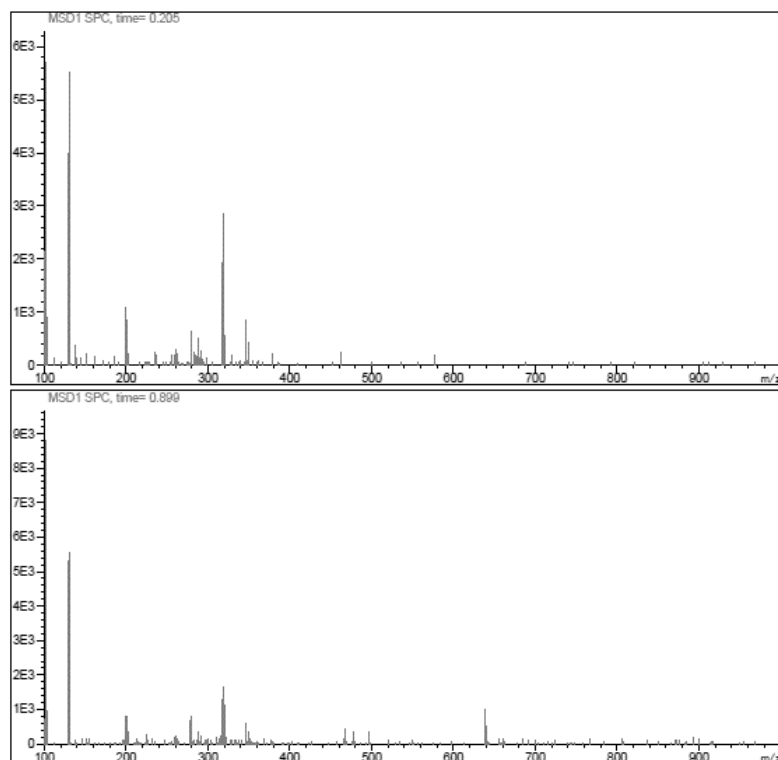

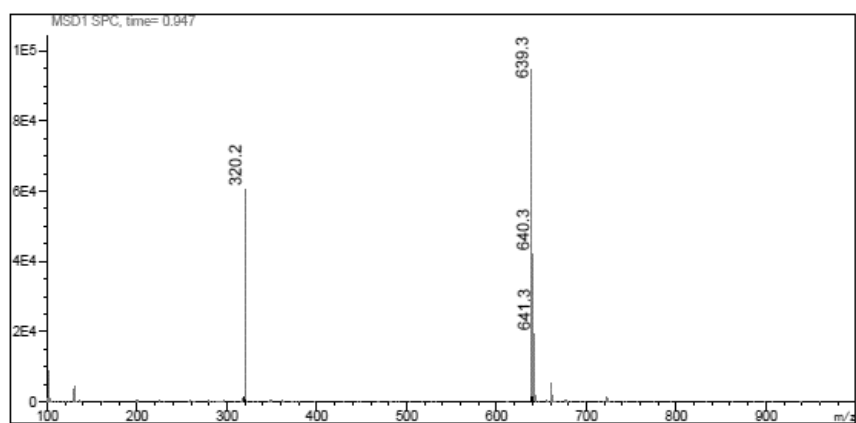

**<sup>1</sup>H NMR** 9-[(2*R*,3*R*,4*R*,5*S*)-3,4-Bis[[*tert*-butyl(dimethyl)silyl]oxy]-5- (thiazol-2-ylsulfanylmethyl) tetrahydrofuran-2-yl]purin-6-amine (**45h**)

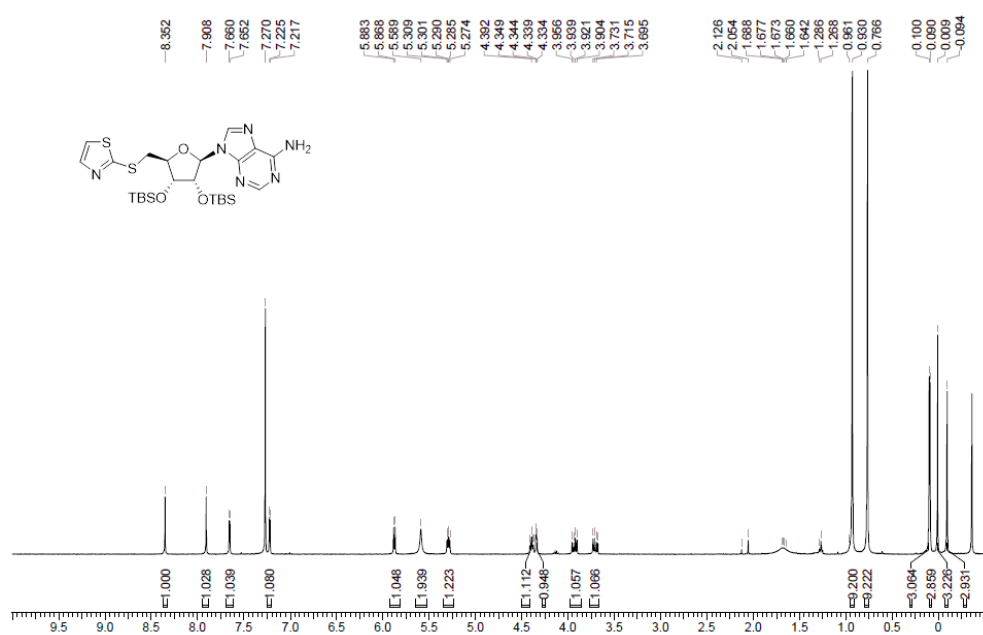

**LCMS** 9-[(2*R*,3*R*,4*R*,5*S*)-3,4-Bis[[*tert*-butyl(dimethyl)silyl]oxy]-5- (thiazol-2-ylsulfanylmethyl) tetrahydrofuran-2-yl]purin-6-amine (**45h**)

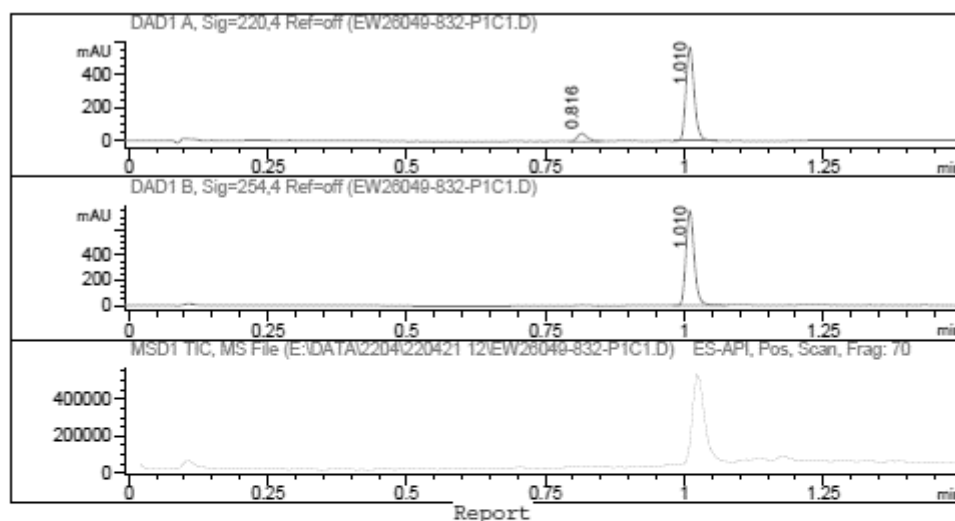

=====  
Signal 1 : DAD1 A, Sig=220,4 Ref=off

| # | Meas. | Ret.  | Height  | Width | Area    | Area % |
|---|-------|-------|---------|-------|---------|--------|
| 1 |       | 0.816 | 48.042  | 0.019 | 60.401  | 9.113  |
| 2 |       | 1.010 | 576.954 | 0.016 | 602.418 | 90.887 |

Signal 2 : DAD1 B, Sig=254,4 Ref=off

| # | Meas. | Ret.  | Height  | Width | Area    | Area %  |
|---|-------|-------|---------|-------|---------|---------|
| 1 |       | 1.010 | 759.583 | 0.016 | 784.489 | 100.000 |

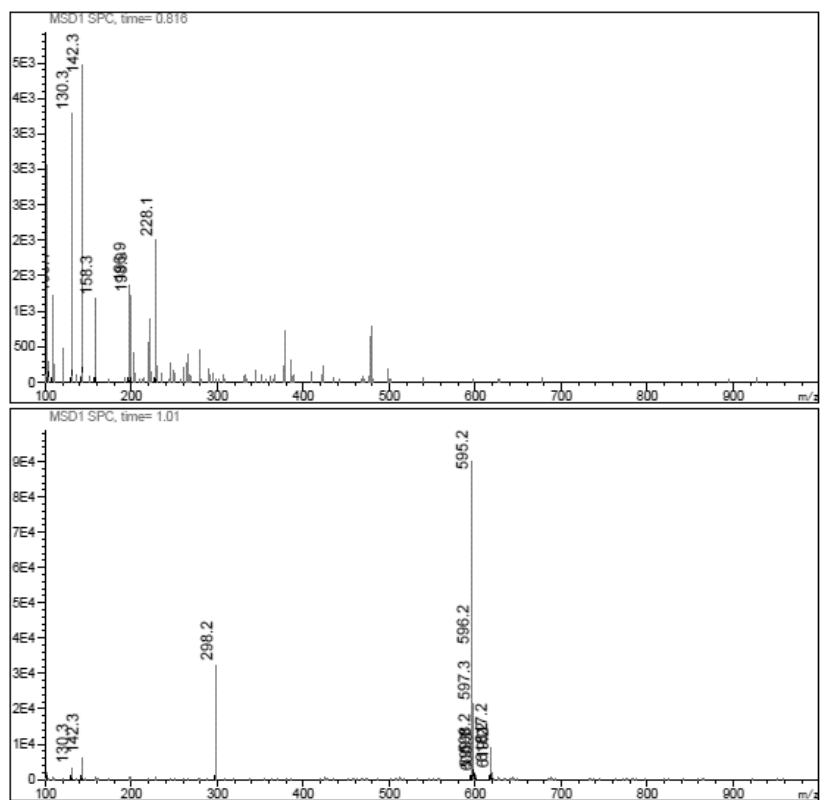

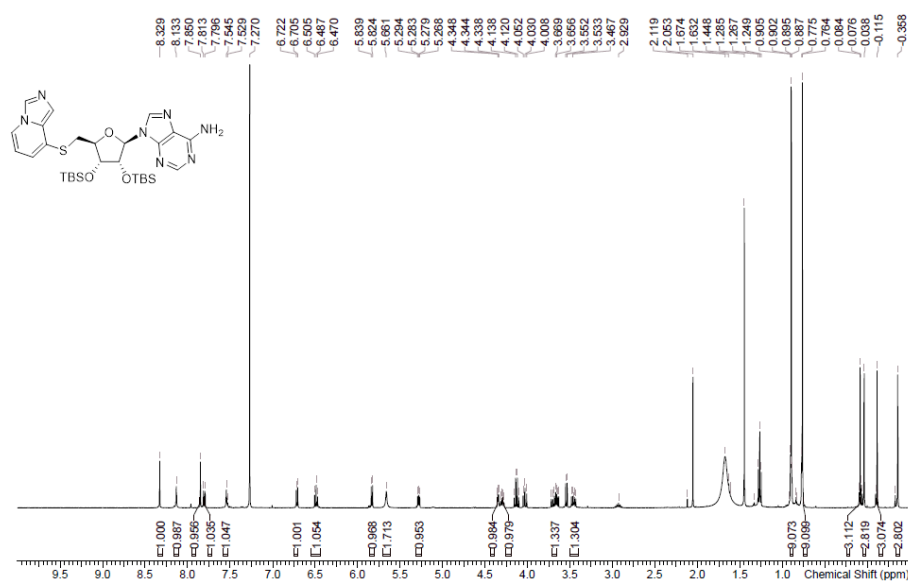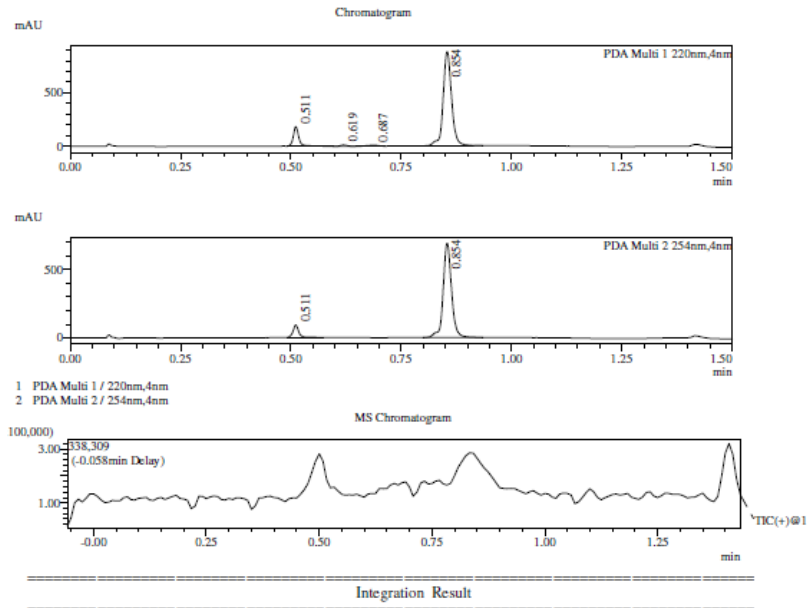

| PDA Ch1 220nm |           | Peak Table |         |           |         |        |
|---------------|-----------|------------|---------|-----------|---------|--------|
| Peak#         | Ret. Time | Height     | Height% | USP Width | Area    | Area%  |
| 1             | 0.511     | 183504     | 16.951  | 0.024     | 167988  | 12.251 |
| 2             | 0.619     | 12630      | 1.167   | 0.030     | 13184   | 0.961  |
| 3             | 0.687     | 9897       | 0.914   | 0.050     | 17364   | 1.266  |
| 4             | 0.854     | 876552     | 80.969  | 0.035     | 1172720 | 85.522 |

  

| PDA Ch2 254nm |           | Peak Table |         |           |        |        |
|---------------|-----------|------------|---------|-----------|--------|--------|
| Peak#         | Ret. Time | Height     | Height% | USP Width | Area   | Area%  |
| 1             | 0.511     | 92065      | 11.781  | 0.025     | 86936  | 8.655  |
| 2             | 0.854     | 689417     | 88.219  | 0.034     | 917488 | 91.345 |

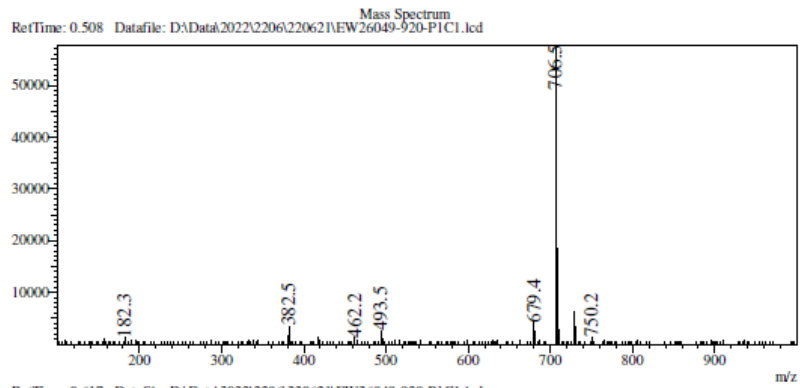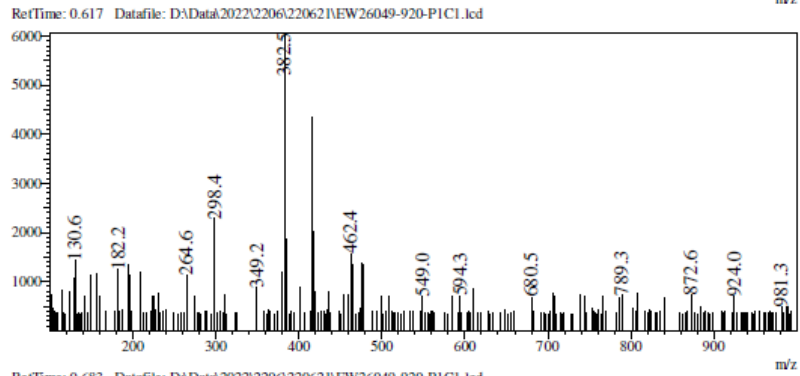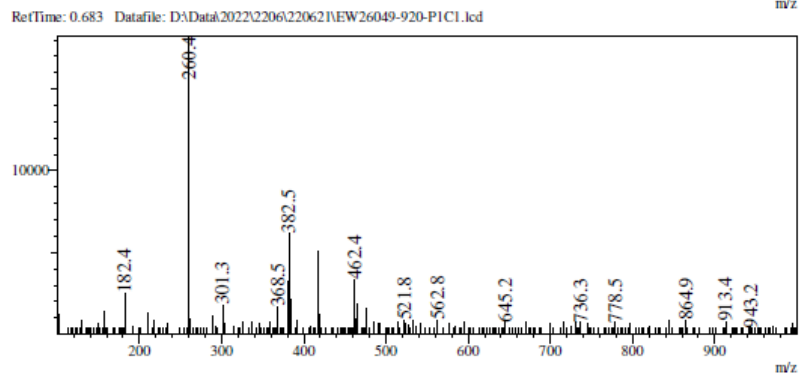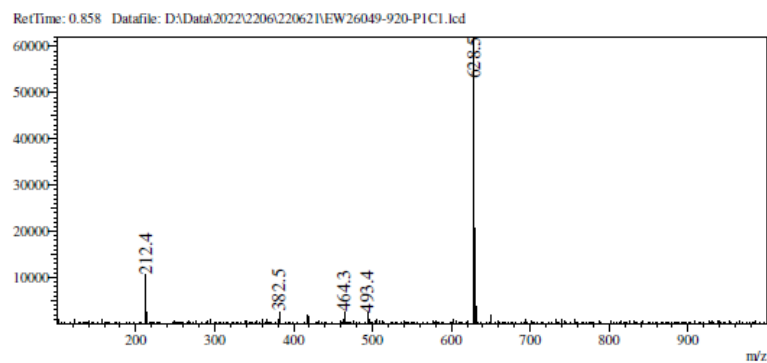



**<sup>1</sup>H NMR** 9-((2R,3R,4R,5S)-3,4-Bis((tert-butyldimethylsilyl)oxy)-5-(((1-methyl-1H-benzo[d]imidazol-2-yl)thio)methyl)tetrahydrofuran-2-yl)-9H-purin-6-amine (**45j**)

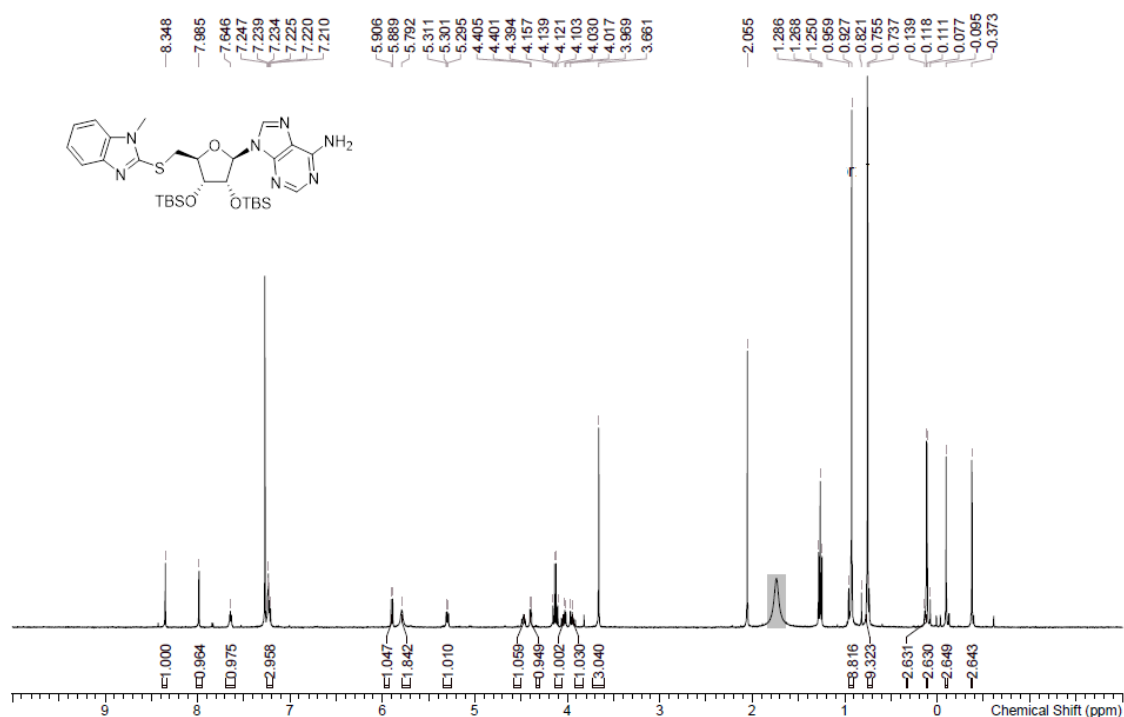

**LCMS** 9-((2R,3R,4R,5S)-3,4-Bis((tert-butyldimethylsilyl)oxy)-5-(((1-methyl-1H-benzo[d]imidazol-2-yl)thio)methyl)tetrahydrofuran-2-yl)-9H-purin-6-amine (**45j**)

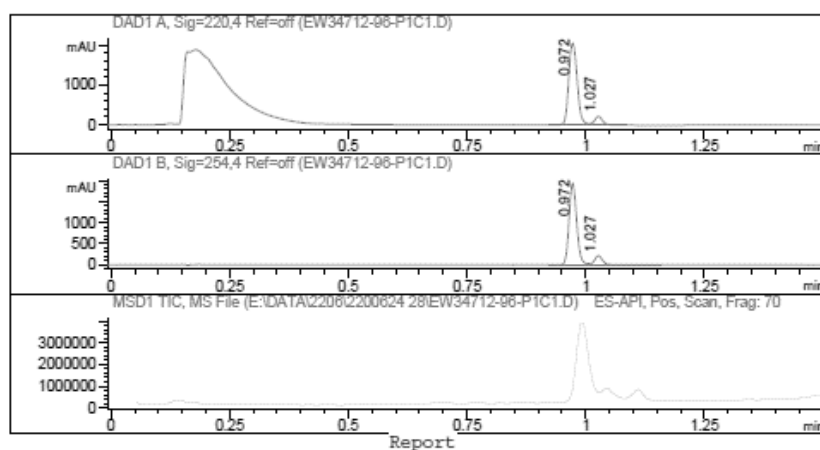

| Signal 1 : DAD1 A, Sig=220,4 Ref=off |       |       |          |       |          |        |
|--------------------------------------|-------|-------|----------|-------|----------|--------|
| #                                    | Meas. | Ret.  | Height   | Width | Area     | Area % |
| 1                                    |       | 0.972 | 2073.677 | 0.020 | 2568.364 | 90.738 |
| 2                                    |       | 1.027 | 220.629  | 0.018 | 262.159  | 9.262  |

  

| Signal 2 : DAD1 B, Sig=254,4 Ref=off |       |       |          |       |          |        |
|--------------------------------------|-------|-------|----------|-------|----------|--------|
| #                                    | Meas. | Ret.  | Height   | Width | Area     | Area % |
| 1                                    |       | 0.972 | 1939.357 | 0.018 | 2162.180 | 89.326 |
| 2                                    |       | 1.027 | 214.098  | 0.018 | 258.357  | 10.674 |

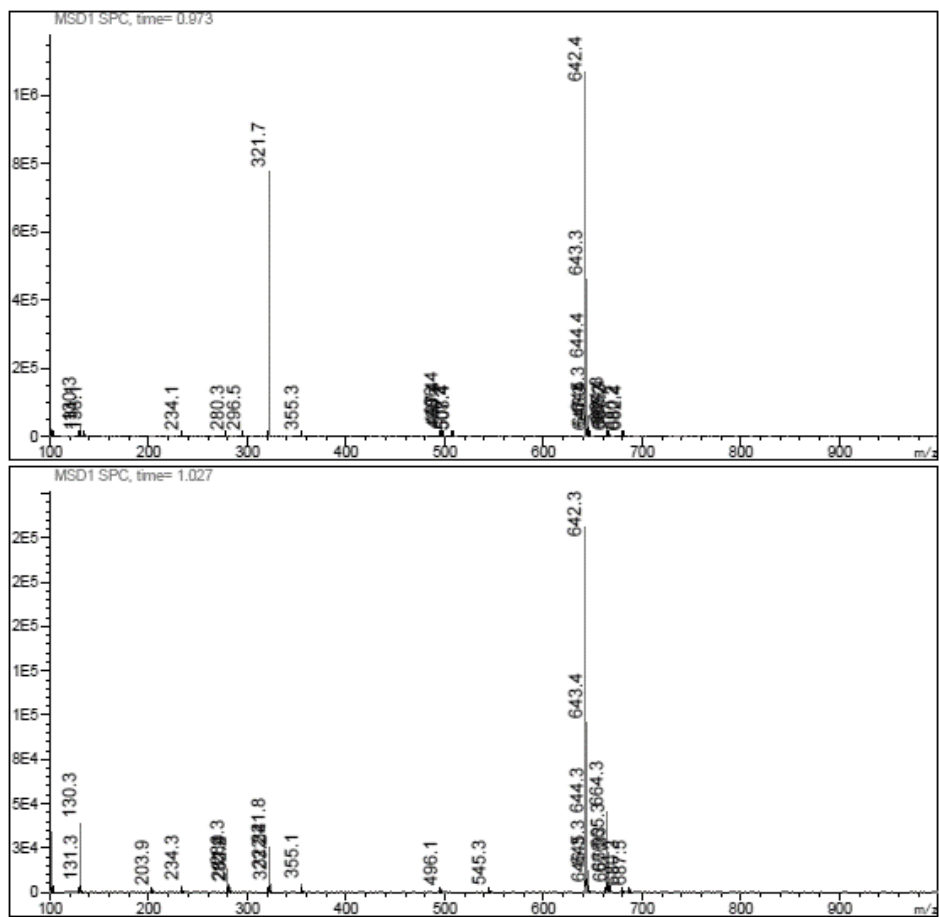

**LCMS 9-((2R,3R,4R,5S)-5-((Benzo[d]oxazol-2-ylthio)methyl)-3,4-bis((tertbutyldimethylsilyl) oxy)tetrahydrofuran-2-yl)-9H-purin-6-amine (45k)**

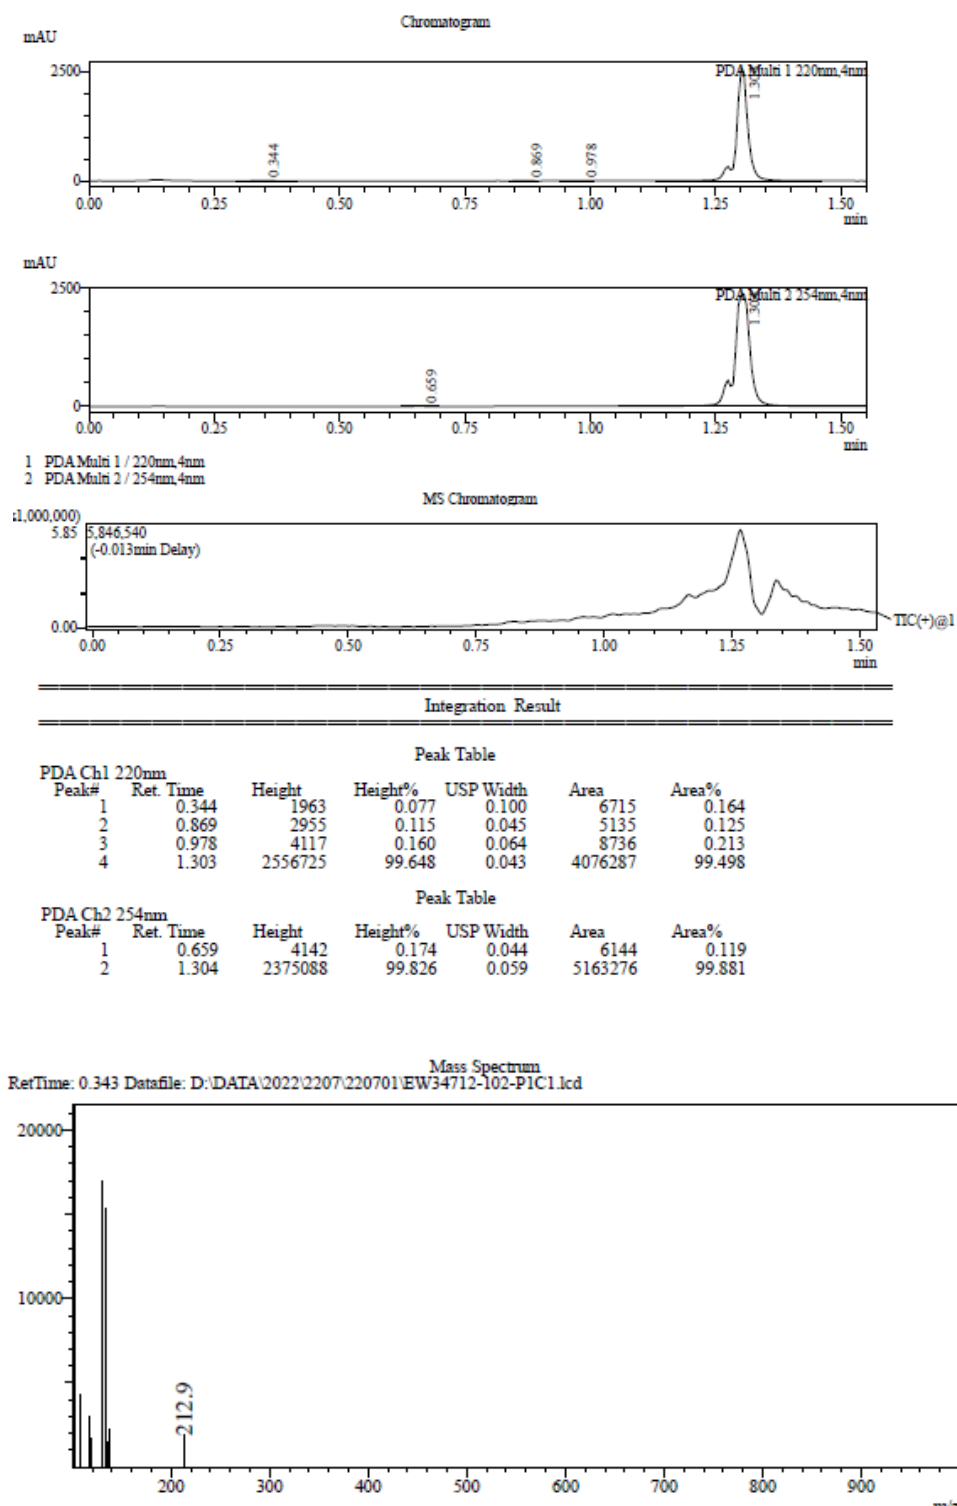

RefTime: 0.870 Datafile: D:\DATA\2022\2207\220701\EW34712-102-P1C1.lcd

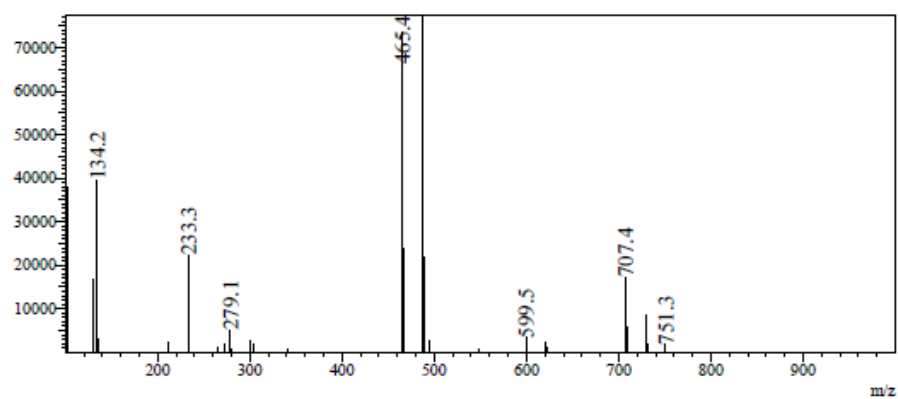

RefTime: 0.977 Datafile: D:\DATA\2022\2207\220701\EW34712-102-P1C1.lcd

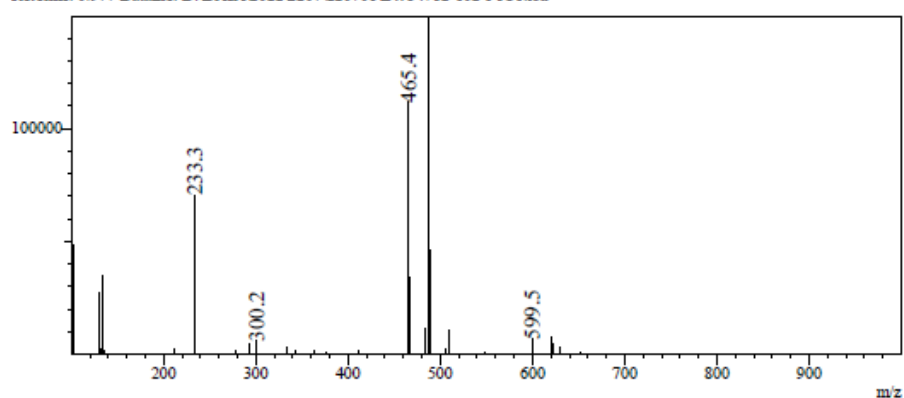

RefTime: 1.303 Datafile: D:\DATA\2022\2207\220701\EW34712-102-P1C1.lcd

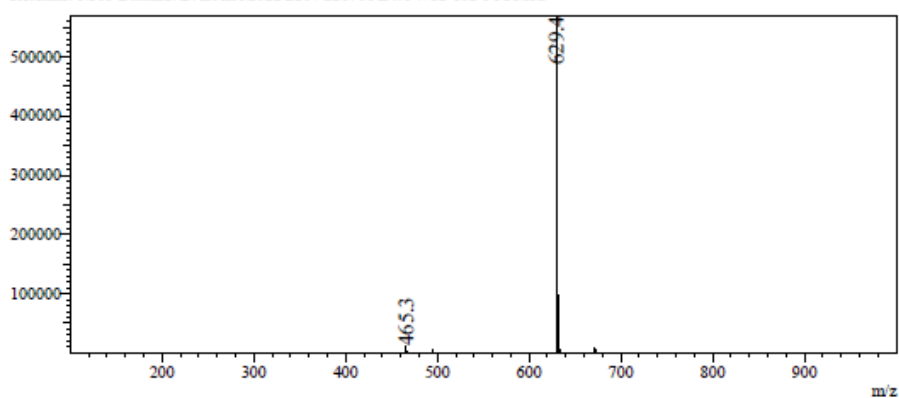

**LCMS 9-((2R,3R,4R,5S)-5-(((1H-Benzo[d]imidazol-2-yl)thio)methyl)-3,4-bis((tertbutyldimethylsilyl)oxy)tetrahydrofuran-2-yl)-9H-purin-6-amine (45I)**

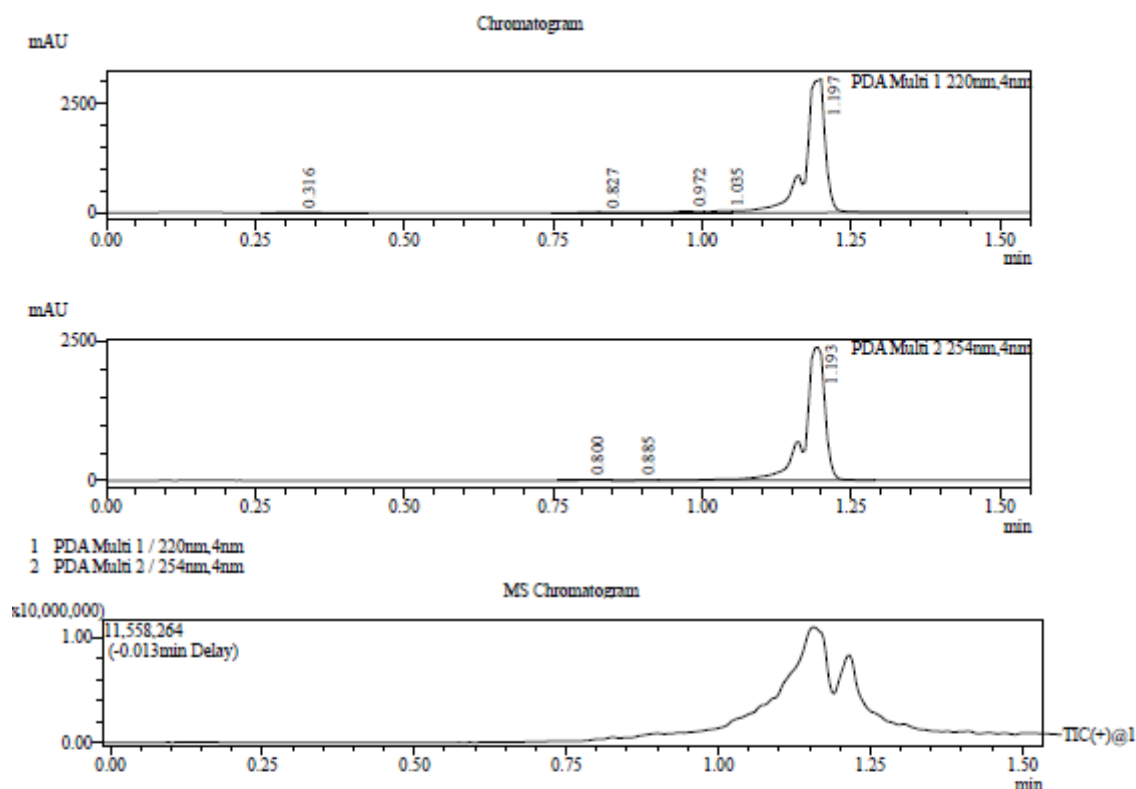

#### Integration Result

##### Peak Table

PDA Ch1 220nm

| Peak# | Ret. Time | Height  | Height% | USP Width | Area    | Area%  |
|-------|-----------|---------|---------|-----------|---------|--------|
| 1     | 0.316     | 5662    | 0.179   | 0.109     | 21695   | 0.281  |
| 2     | 0.827     | 17028   | 0.540   | 0.045     | 37134   | 0.481  |
| 3     | 0.972     | 35702   | 1.132   | 0.087     | 138947  | 1.798  |
| 4     | 1.035     | 41918   | 1.329   | 0.230     | 95377   | 1.235  |
| 5     | 1.197     | 3054270 | 96.820  | 0.224     | 7432714 | 96.206 |

##### Peak Table

PDA Ch2 254nm

| Peak# | Ret. Time | Height  | Height% | USP Width | Area    | Area%  |
|-------|-----------|---------|---------|-----------|---------|--------|
| 1     | 0.800     | 9089    | 0.379   | 0.091     | 17746   | 0.303  |
| 2     | 0.885     | 5920    | 0.247   | 0.258     | 23826   | 0.407  |
| 3     | 1.193     | 2384951 | 99.375  | 0.059     | 5815172 | 99.290 |

Mass Spectrum  
RetTime: 0.317 Datafile: D:\DATA\2022\2207\220701\EW54712-103-P1C1.lcd

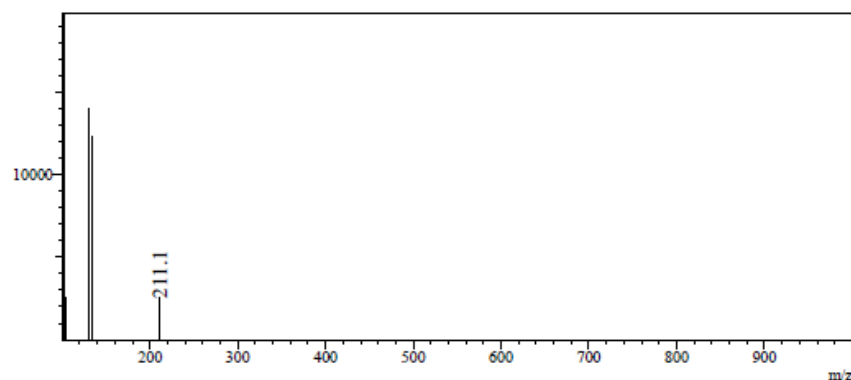

RefTime: 0.827 Datafile: D:\DATA\2022\2207\220701\EW34712-103-P1C1.lcd

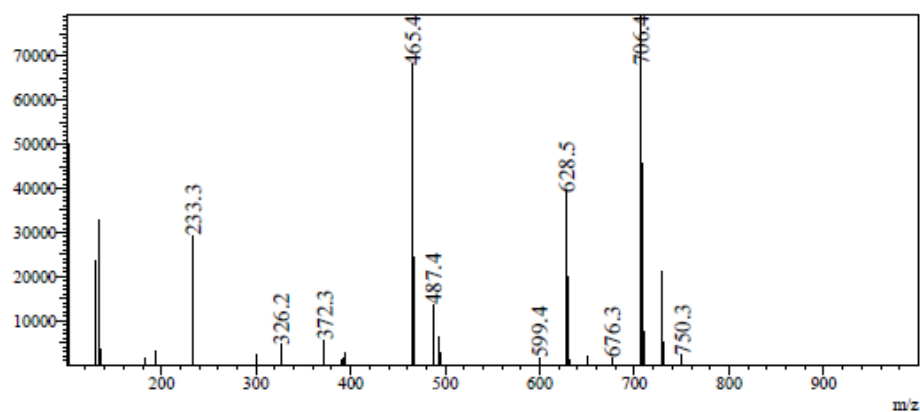

RefTime: 0.973 Datafile: D:\DATA\2022\2207\220701\EW34712-103-P1C1.lcd

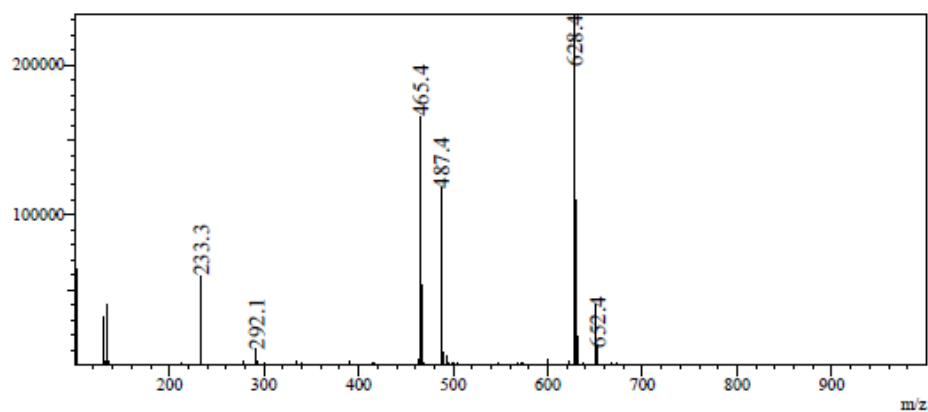

RefTime: 1.037 Datafile: D:\DATA\2022\2207\220701\EW34712-103-P1C1.lcd

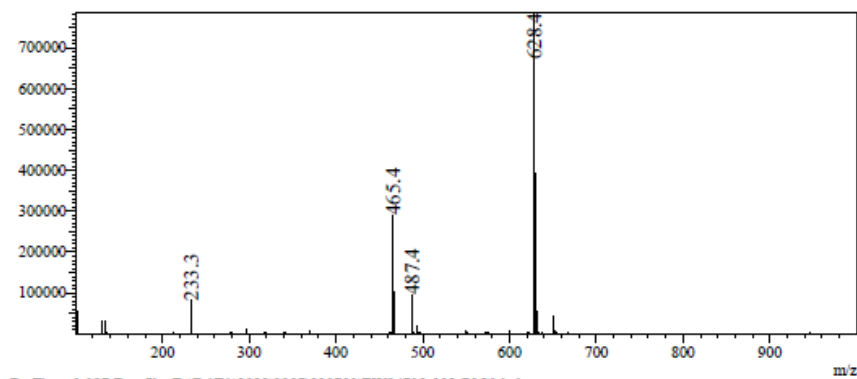

RefTime: 1.197 Datafile: D:\DATA\2022\2207\220701\EW34712-103-P1C1.lcd

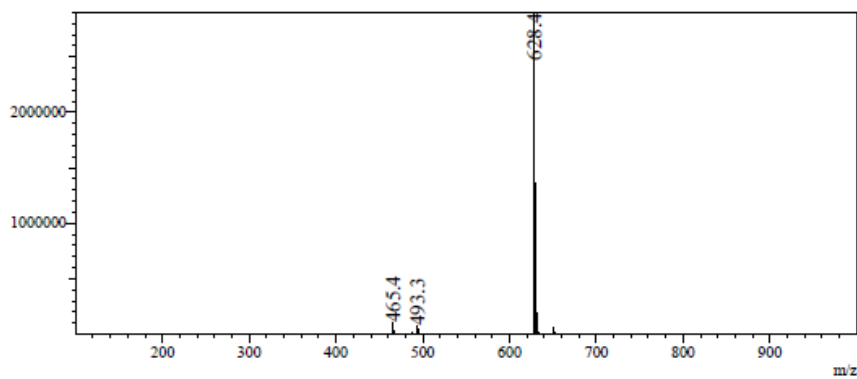

**LCMS** 9-((2R,3R,4R,5S)-5-(((1H-Indazol-7-yl)thio)methyl)-3,4-bis((tert-butyldimethylsilyl)oxy) tetrahydrofuran-2-yl)-9H-purin-6-amine (**45m**)

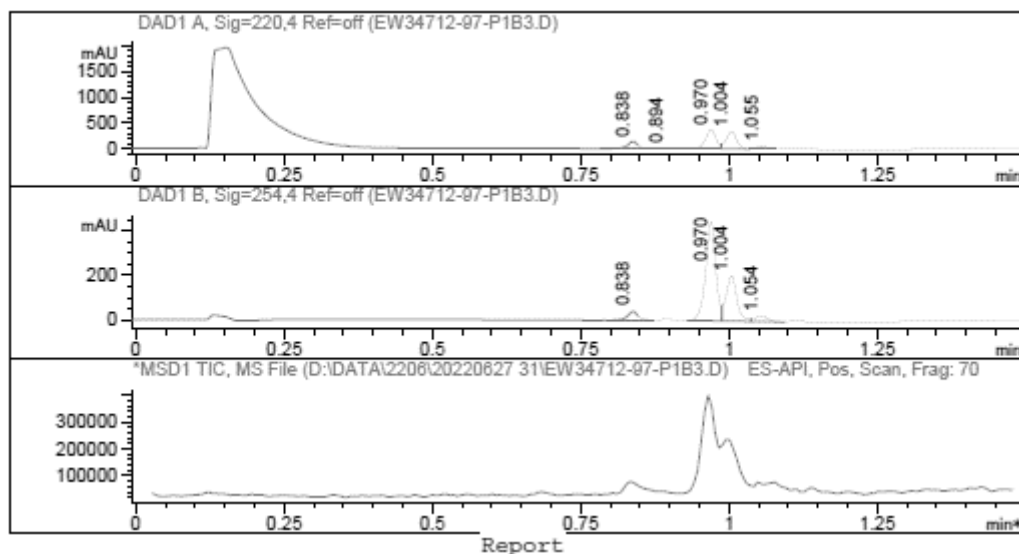

```
=====
```

| Signal 1 : DAD1 A, Sig=220,4 Ref=off |       |       |         |       |         |        |
|--------------------------------------|-------|-------|---------|-------|---------|--------|
| #                                    | Meas. | Ret.  | Height  | Width | Area    | Area % |
| 1                                    |       | 0.838 | 135.808 | 0.019 | 168.799 | 14.768 |
| 2                                    |       | 0.894 | 24.034  | 0.021 | 34.284  | 2.999  |
| 3                                    |       | 0.970 | 372.911 | 0.018 | 443.779 | 38.825 |
| 4                                    |       | 1.004 | 343.672 | 0.019 | 425.769 | 37.249 |
| 5                                    |       | 1.055 | 46.438  | 0.022 | 70.403  | 6.159  |

```
-----
```

| Signal 2 : DAD1 B, Sig=254,4 Ref=off |       |       |         |       |         |        |
|--------------------------------------|-------|-------|---------|-------|---------|--------|
| #                                    | Meas. | Ret.  | Height  | Width | Area    | Area % |
| 1                                    |       | 0.838 | 39.049  | 0.019 | 49.638  | 5.668  |
| 2                                    |       | 0.970 | 446.271 | 0.018 | 532.231 | 60.779 |
| 3                                    |       | 1.004 | 203.776 | 0.019 | 257.435 | 29.398 |
| 4                                    |       | 1.054 | 24.235  | 0.022 | 36.381  | 4.155  |

```
-----
```

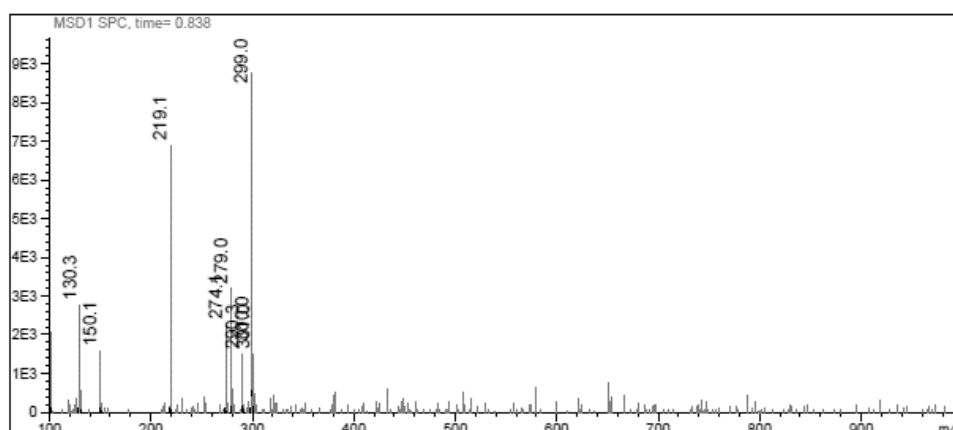

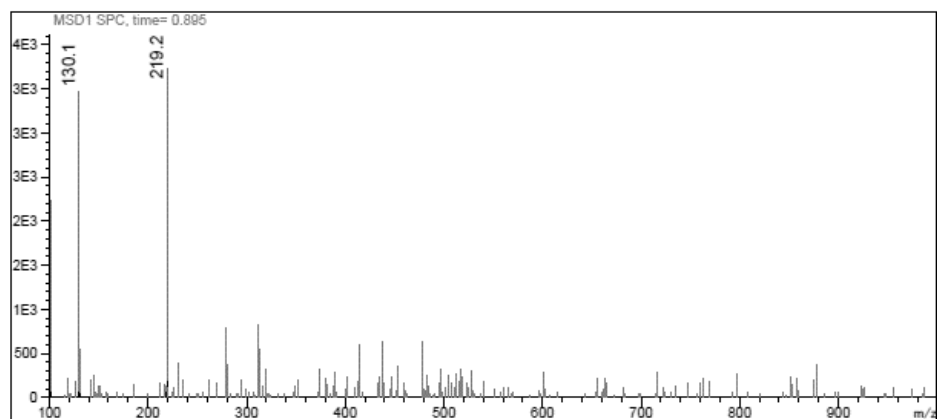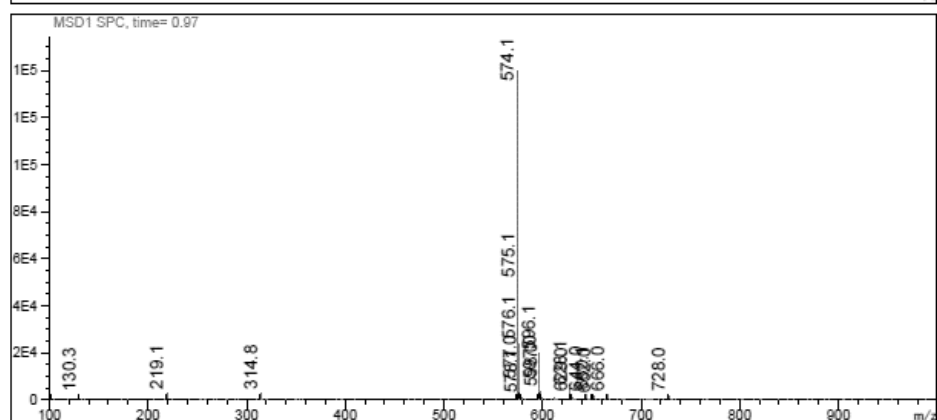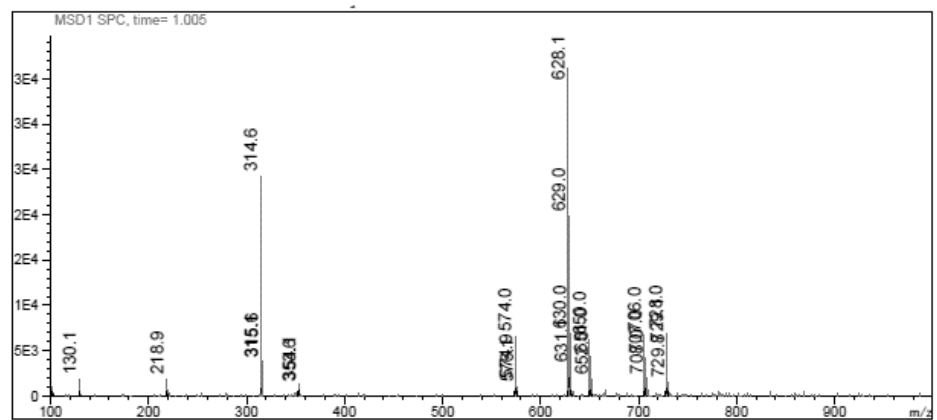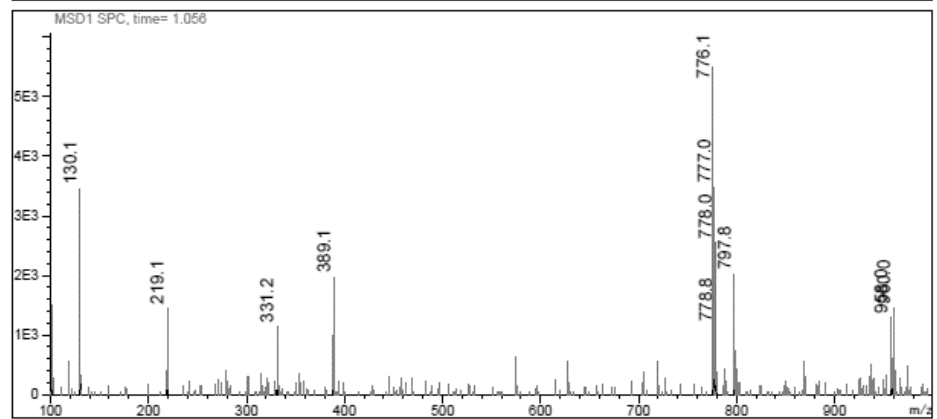



**<sup>1</sup>H NMR** 9-[(2*R*,3*R*,4*R*,5*S*)-3,4-bis[[tert-butyl(dimethyl)silyl]oxy]-5-(imidazo [1,5-*a*]pyridin-7-ylsulfanylmethyl)tetrahydrofuran-2-yl]purin-6-amine (**45n**)

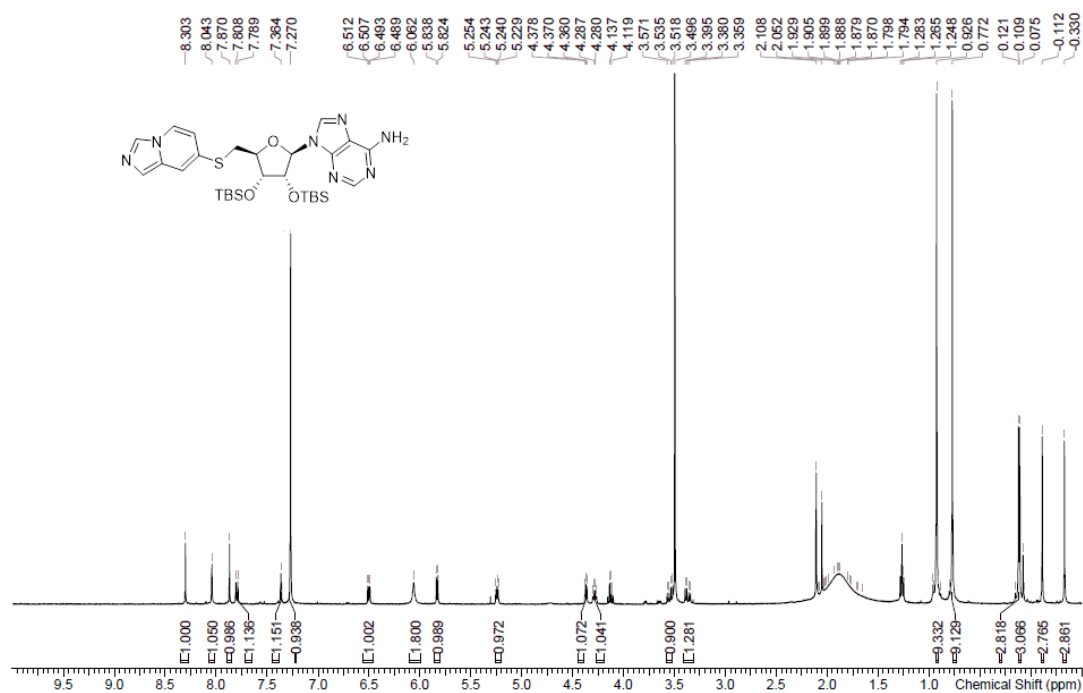

**LCMS** 9-[(2*R*,3*R*,4*R*,5*S*)-3,4-bis[[tert-butyl(dimethyl)silyl]oxy]-5-(imidazo [1,5-*a*]pyridin-7-ylsulfanylmethyl)tetrahydrofuran-2-yl]purin-6-amine (**45n**)

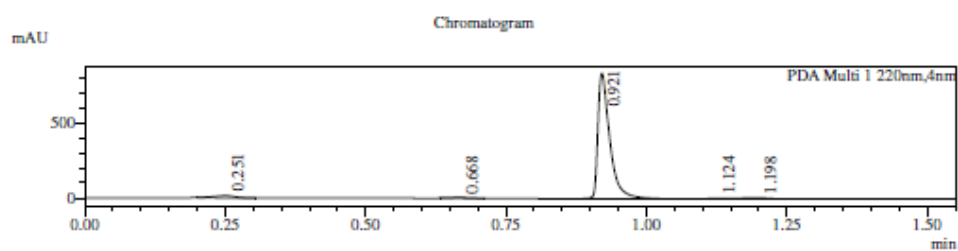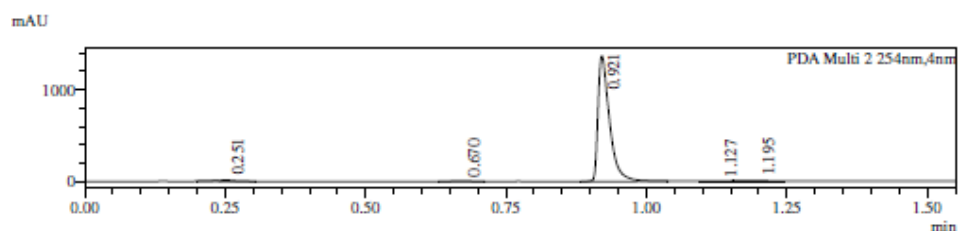

1 PDA Multi 1 / 220nm, 4nm  
2 PDA Multi 2 / 254nm, 4nm

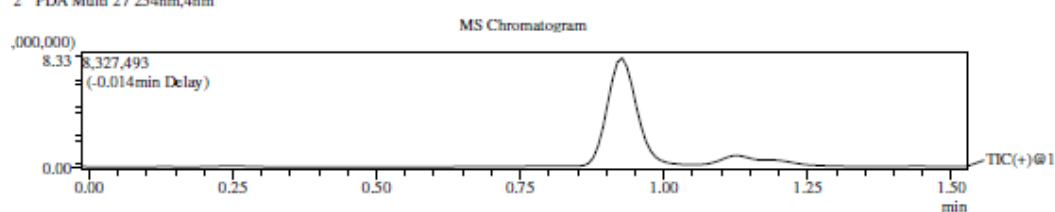

# Integration Result

## Peak Table

PDA Ch1 220nm

| Peak# | Ret. Time | Height | Height% | USP Width | Area    | Area%  |
|-------|-----------|--------|---------|-----------|---------|--------|
| 1     | 0.251     | 14041  | 1.628   | 0.068     | 34180   | 2.610  |
| 2     | 0.668     | 4342   | 0.504   | 0.069     | 11039   | 0.843  |
| 3     | 0.921     | 833221 | 96.636  | 0.038     | 1232865 | 94.145 |
| 4     | 1.124     | 3272   | 0.380   | 0.286     | 15568   | 1.189  |
| 5     | 1.198     | 7355   | 0.853   | 0.096     | 15891   | 1.213  |

## Peak Table

PDA Ch2 254nm

| Peak# | Ret. Time | Height  | Height% | USP Width | Area    | Area%  |
|-------|-----------|---------|---------|-----------|---------|--------|
| 1     | 0.251     | 11948   | 0.858   | 0.068     | 29469   | 1.451  |
| 2     | 0.670     | 3903    | 0.280   | 0.068     | 10322   | 0.508  |
| 3     | 0.921     | 1367846 | 98.179  | 0.037     | 1960629 | 96.540 |
| 4     | 1.127     | 2830    | 0.203   | 0.000     | 8108    | 0.399  |
| 5     | 1.195     | 6695    | 0.481   | 0.109     | 22376   | 1.102  |

Mass Spectrum  
RefTime: 0.253 Datafile: D:\DATA\2022\2207\220726\EW26049-970-P1S1.lcd

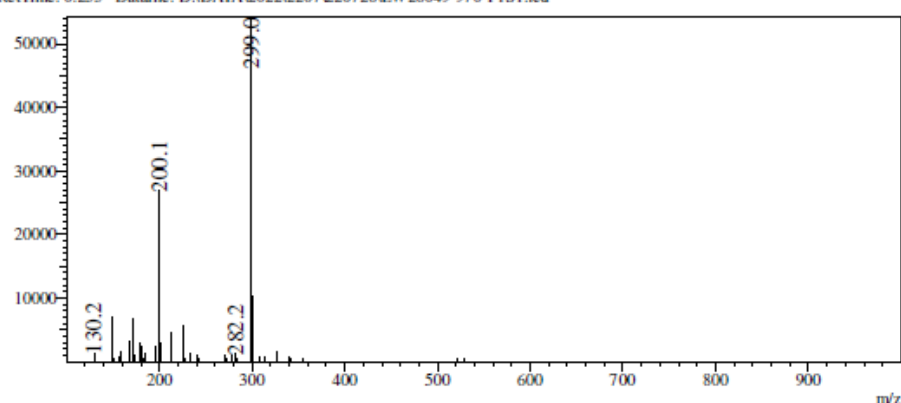

RefTime: 0.669 Datafile: D:\DATA\2022\2207\220726\EW26049-970-P1S1.lcd

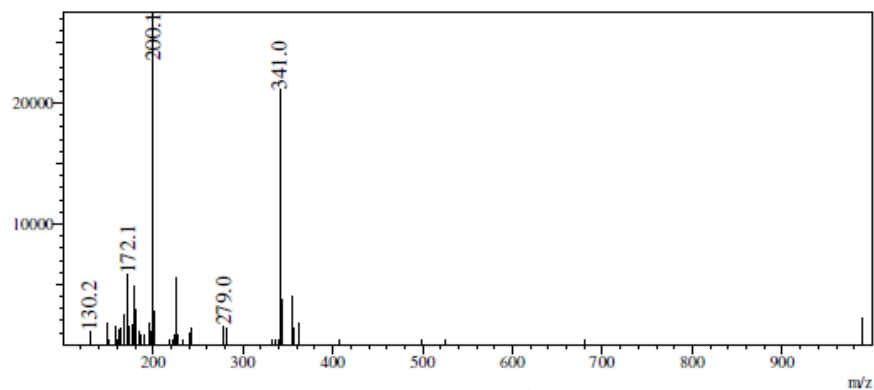

RefTime: 0.919 Datafile: D:\DATA\2022\2207\220726\EW26049-970-P1S1.lcd

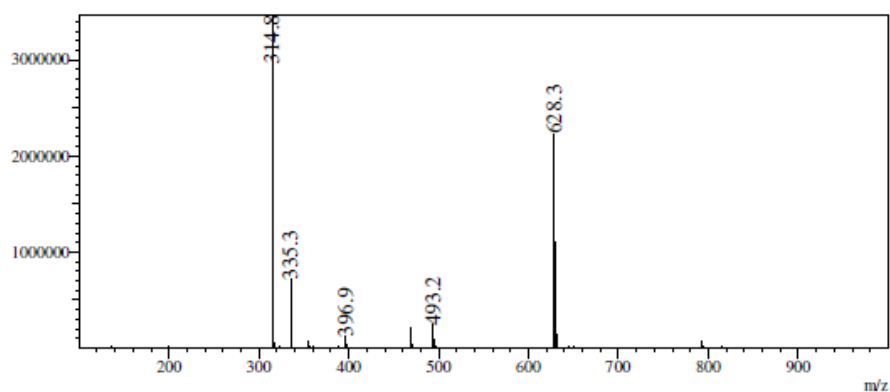

RefTime: 1.128 Datafile: D:\DATA\2022\2207\220726\EW26049-970-P1S1.lcd

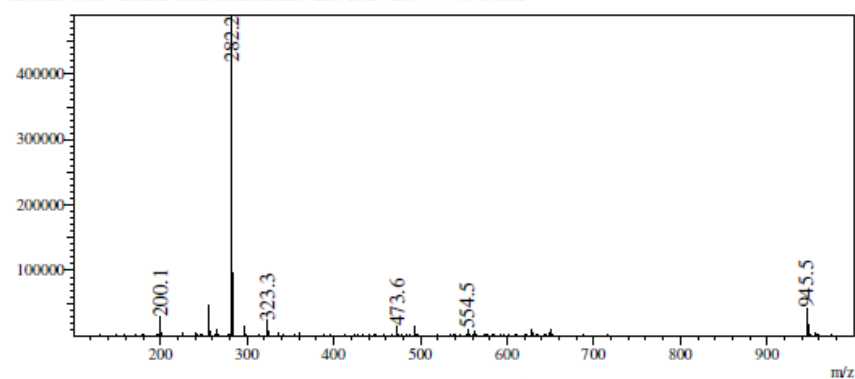

RefTime: 1.194 Datafile: D:\DATA\2022\2207\220726\EW26049-970-P1S1.lcd

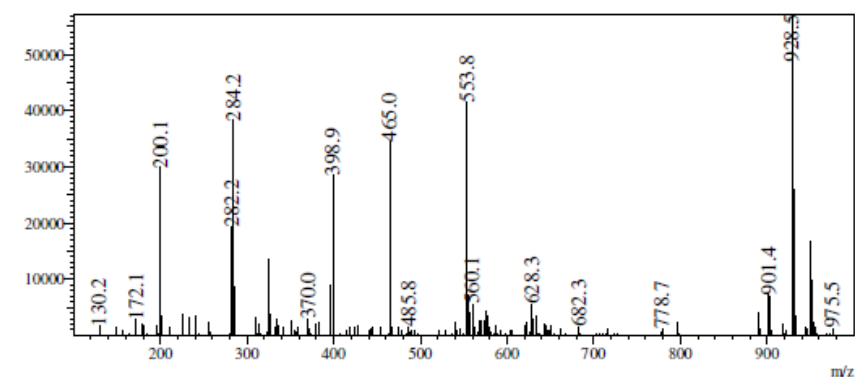

**<sup>1</sup>H NMR** 9-[(2*R*,3*R*,4*R*,5*R*)-5-(1,3-Benzothiazol-2-yloxymethyl)-3,4-bis[[*tert*-butyl(dimethyl)silyl]oxy]tetrahydrofuran-2-yl]purin-6-amine (**45o**)

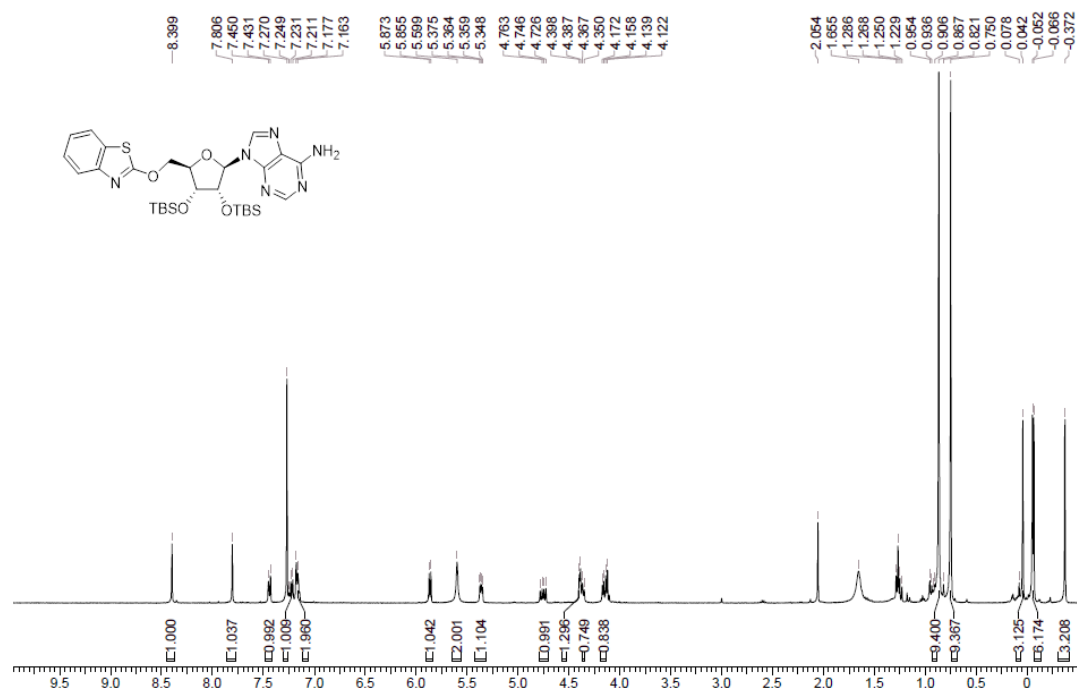

**LCMS 9-[(2*R*,3*R*,4*R*,5*R*)-5-(1,3-Benzothiazol-2-yloxymethyl)-3,4-bis[[*tert*-butyl(dimethyl)silyl]oxy]tetrahydrofuran-2-yl]purin-6-amine (45o)**

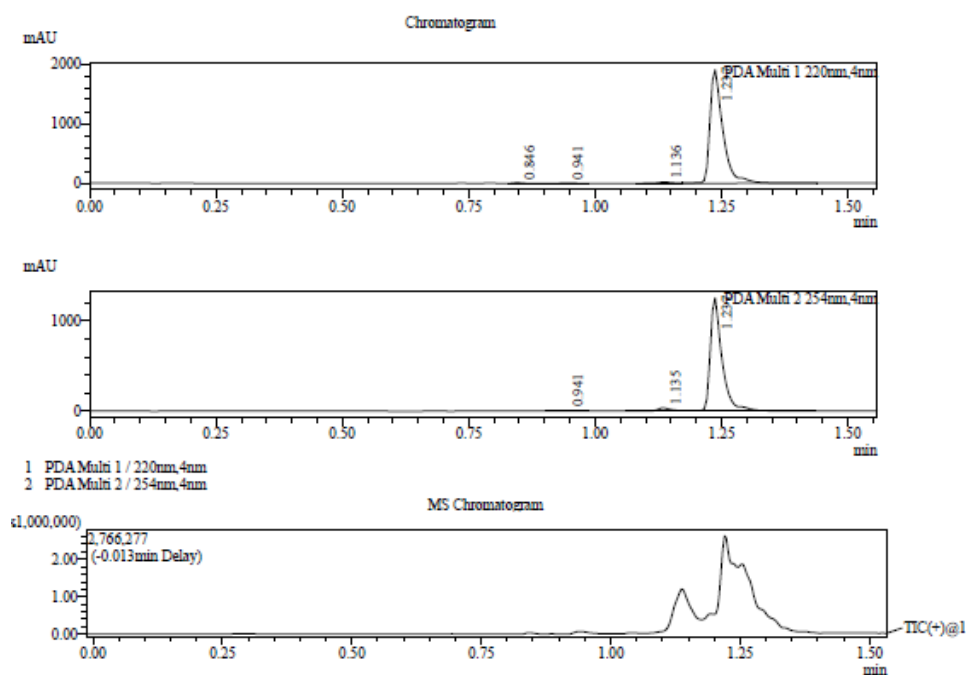

Integration Result

| Peak Table    |           |         |         |           |         |        |
|---------------|-----------|---------|---------|-----------|---------|--------|
| PDA Ch1 220nm |           |         |         |           |         |        |
| Peak#         | Ret. Time | Height  | Height% | USP Width | Area    | Area%  |
| 1             | 0.846     | 10568   | 0.545   | 0.029     | 12036   | 0.353  |
| 2             | 0.941     | 6503    | 0.336   | 0.042     | 9611    | 0.282  |
| 3             | 1.136     | 19149   | 0.988   | 0.055     | 36774   | 1.077  |
| 4             | 1.237     | 1901544 | 98.131  | 0.049     | 3355166 | 98.289 |

  

| Peak Table    |           |         |         |           |         |        |
|---------------|-----------|---------|---------|-----------|---------|--------|
| PDA Ch2 254nm |           |         |         |           |         |        |
| Peak#         | Ret. Time | Height  | Height% | USP Width | Area    | Area%  |
| 1             | 0.941     | 3443    | 0.266   | 0.042     | 5125    | 0.244  |
| 2             | 1.135     | 34723   | 2.680   | 0.050     | 62322   | 2.970  |
| 3             | 1.237     | 1257587 | 97.055  | 0.044     | 2030859 | 96.786 |

Mass Spectrum  
RetTime: 0.847 Datafile: D:\DATA\2022\2201\220120\EW26049-718-P152.lcd

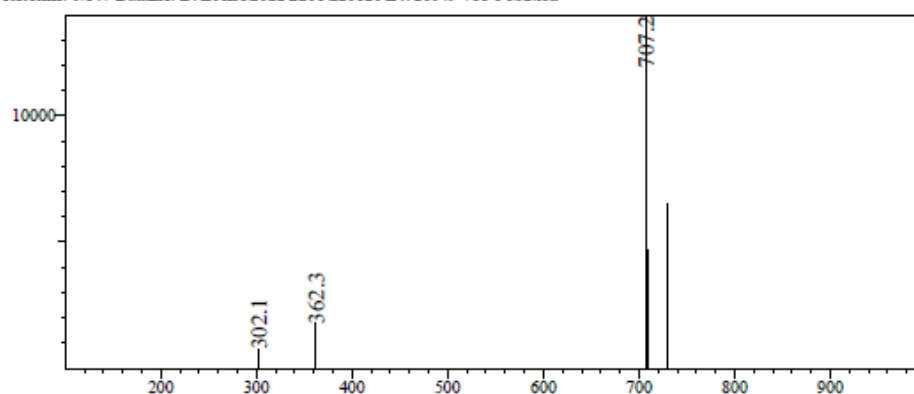

RefTime: 0.940 Datafile: D:\DATA\2022\2201\220120\EW26049-718-P1S2.lcd

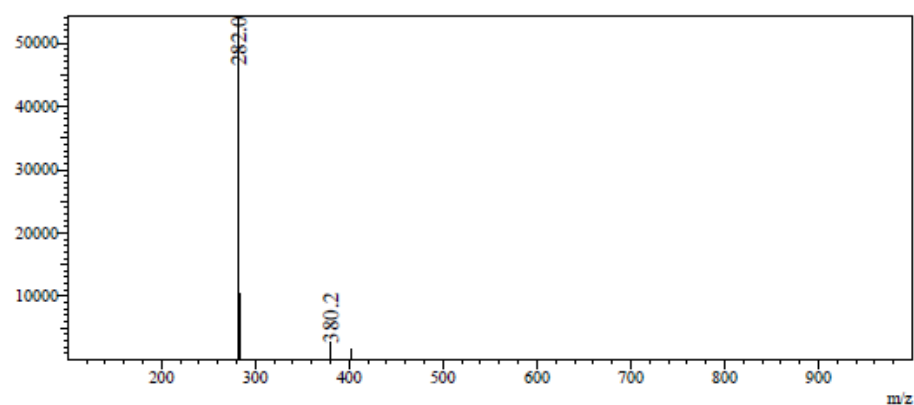

RefTime: 1.137 Datafile: D:\DATA\2022\2201\220120\EW26049-718-P1S2.lcd

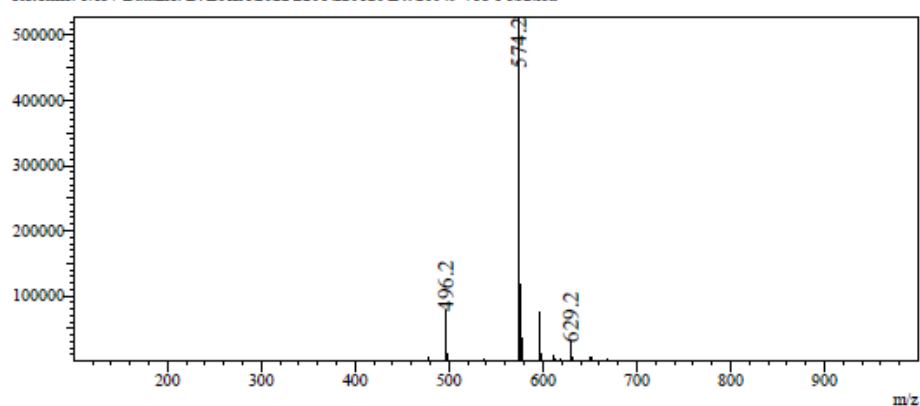

RefTime: 1.237 Datafile: D:\DATA\2022\2201\220120\EW26049-718-P1S2.lcd

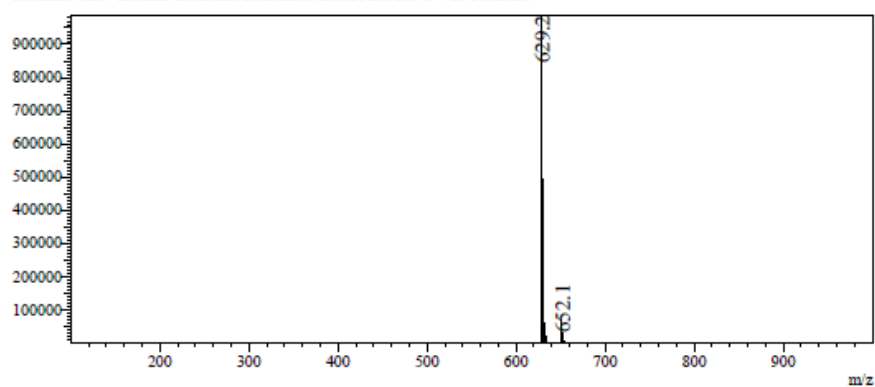

**LCMS** *N*-[[[(2*R*,3*R*,4*R*,5*R*)-5-(6-Aminopurin-9-yl)-3,4-bis[[*tert*-butyl(dimethyl)silyl]oxy] tetrahydrofuran-2-yl)methyl]-1,3-benzothiazol-2-amine (**45p**)

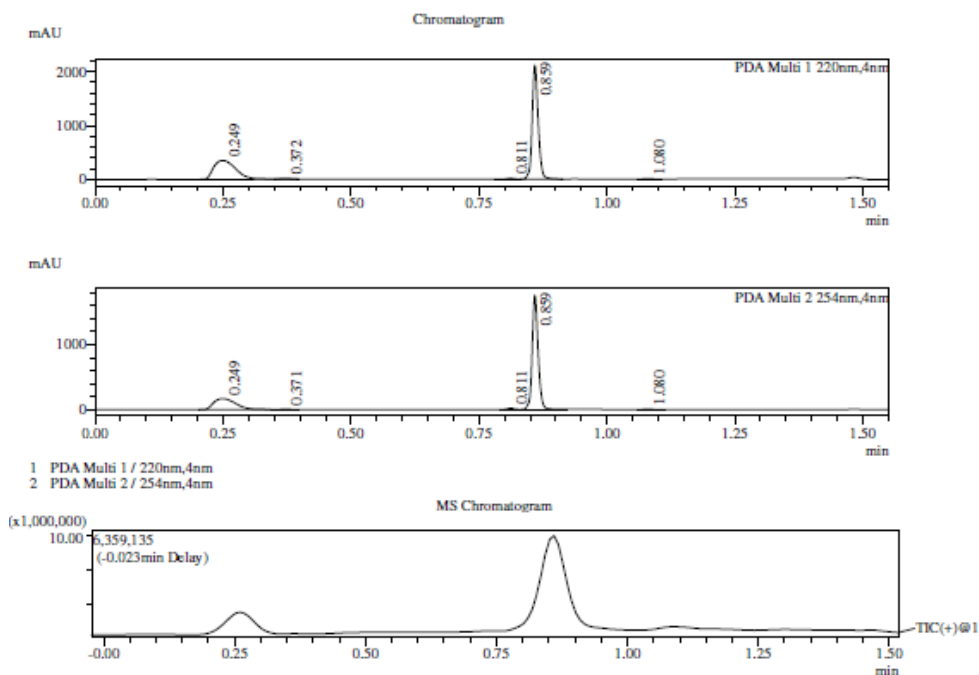

#### Integration Result

##### Peak Table

| Peak# | Ret. Time | Height  | Height% | USP Width | Area    | Area%  |
|-------|-----------|---------|---------|-----------|---------|--------|
| 1     | 0.249     | 351253  | 14.042  | 0.077     | 1063423 | 37.939 |
| 2     | 0.372     | 9852    | 0.394   | 0.029     | 10096   | 0.360  |
| 3     | 0.811     | 18509   | 0.740   | 0.027     | 18464   | 0.659  |
| 4     | 0.859     | 2115149 | 84.559  | 0.023     | 1705112 | 60.832 |
| 5     | 1.080     | 6626    | 0.265   | 0.024     | 5869    | 0.209  |

##### Peak Table

| Peak# | Ret. Time | Height  | Height% | USP Width | Area    | Area%  |
|-------|-----------|---------|---------|-----------|---------|--------|
| 1     | 0.249     | 167094  | 8.561   | 0.077     | 501190  | 25.976 |
| 2     | 0.371     | 4869    | 0.249   | 0.035     | 7309    | 0.379  |
| 3     | 0.811     | 20137   | 1.032   | 0.026     | 18101   | 0.938  |
| 4     | 0.859     | 1753802 | 89.852  | 0.023     | 1397283 | 72.419 |
| 5     | 1.080     | 5984    | 0.307   | 0.025     | 5547    | 0.288  |

Mass Spectrum  
RefTime: 0.252 Datafile: D:\DATA\2022\2201\220117\EW26049-712-P1C2.lcd

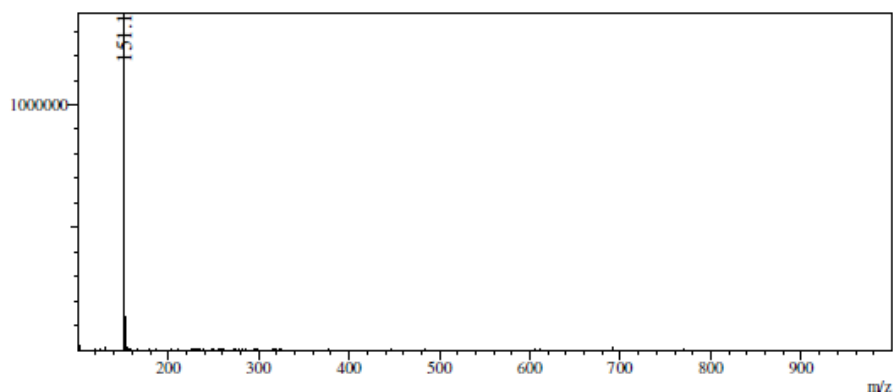

RetTime: 0.368 Datafile: D:\DATA\2022\2201\220117\EW26049-712-P1C2.lcd

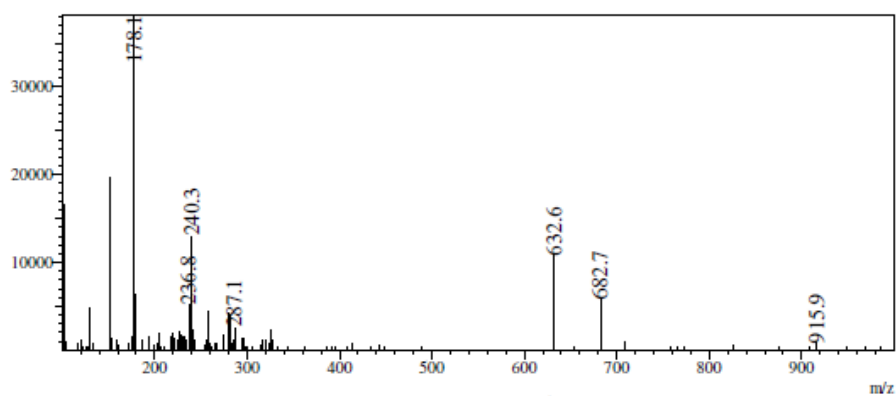

RetTime: 0.810 Datafile: D:\DATA\2022\2201\220117\EW26049-712-P1C2.lcd

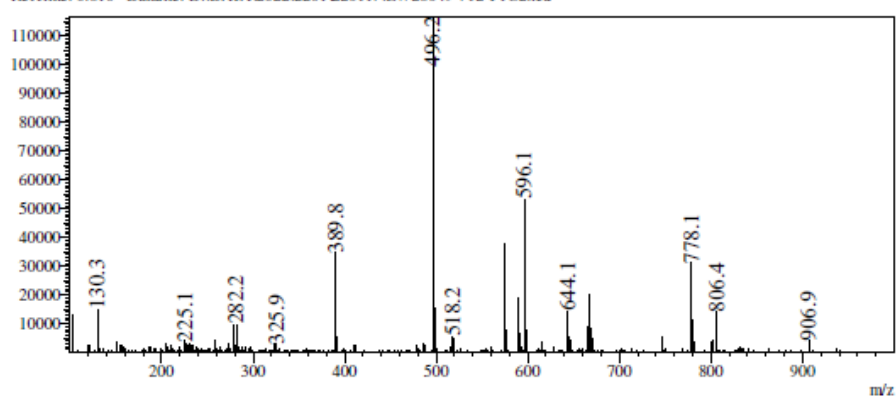

RetTime: 0.860 Datafile: D:\DATA\2022\2201\220117\EW26049-712-P1C2.lcd

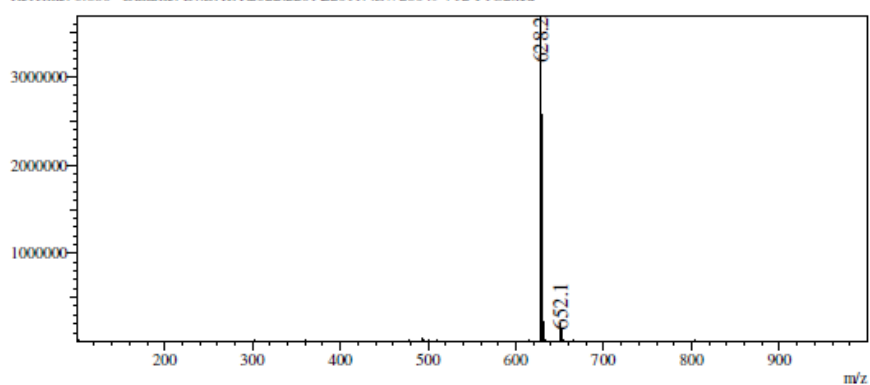

RetTime: 1.077 Datafile: D:\DATA\2022\2201\220117\EW26049-712-P1C2.lcd

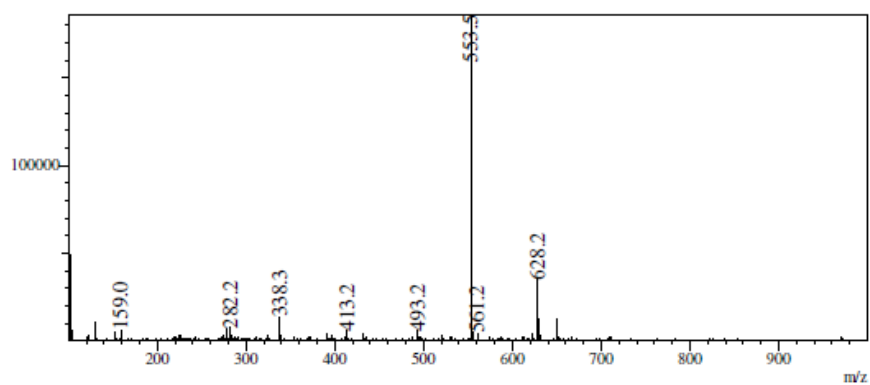



**<sup>1</sup>H NMR** (2*R*,3*R*,4*S*,5*S*)-2-(6-aminopurin-9-yl)-5-(1,3-benzothiazol-2-ylsulfanylmethyl) tetrahydrofuran-3,4-diol (**1**)

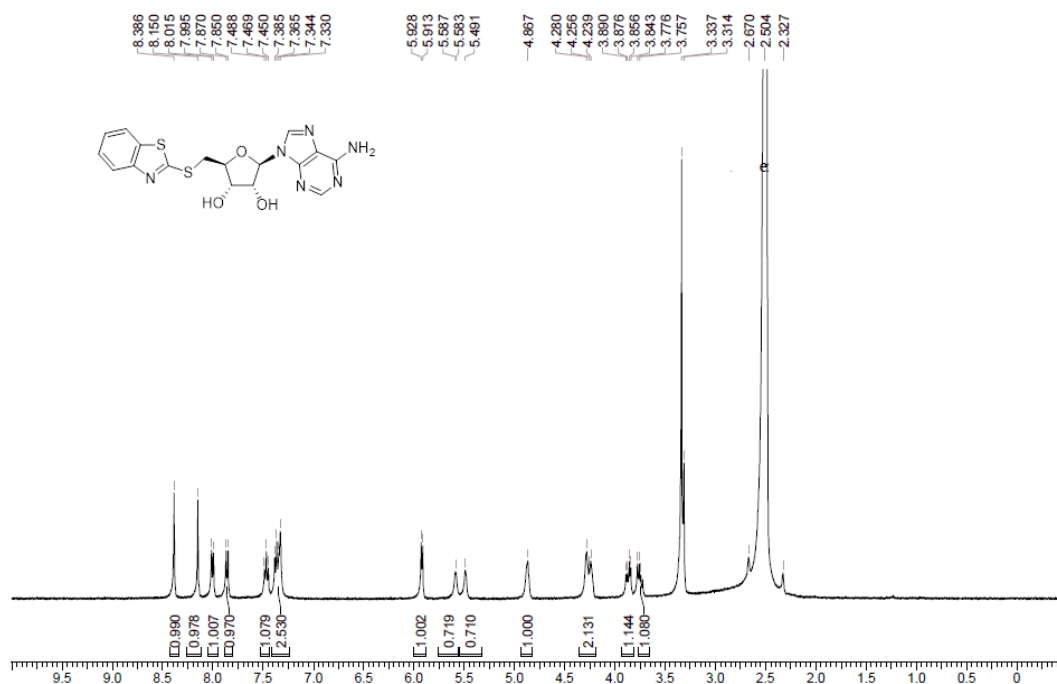

**<sup>13</sup>C NMR** (2*R*,3*R*,4*S*,5*S*)-2-(6-aminopurin-9-yl)-5-(1,3-benzothiazol-2-ylsulfanylmethyl) tetrahydrofuran-3,4-diol (**1**)

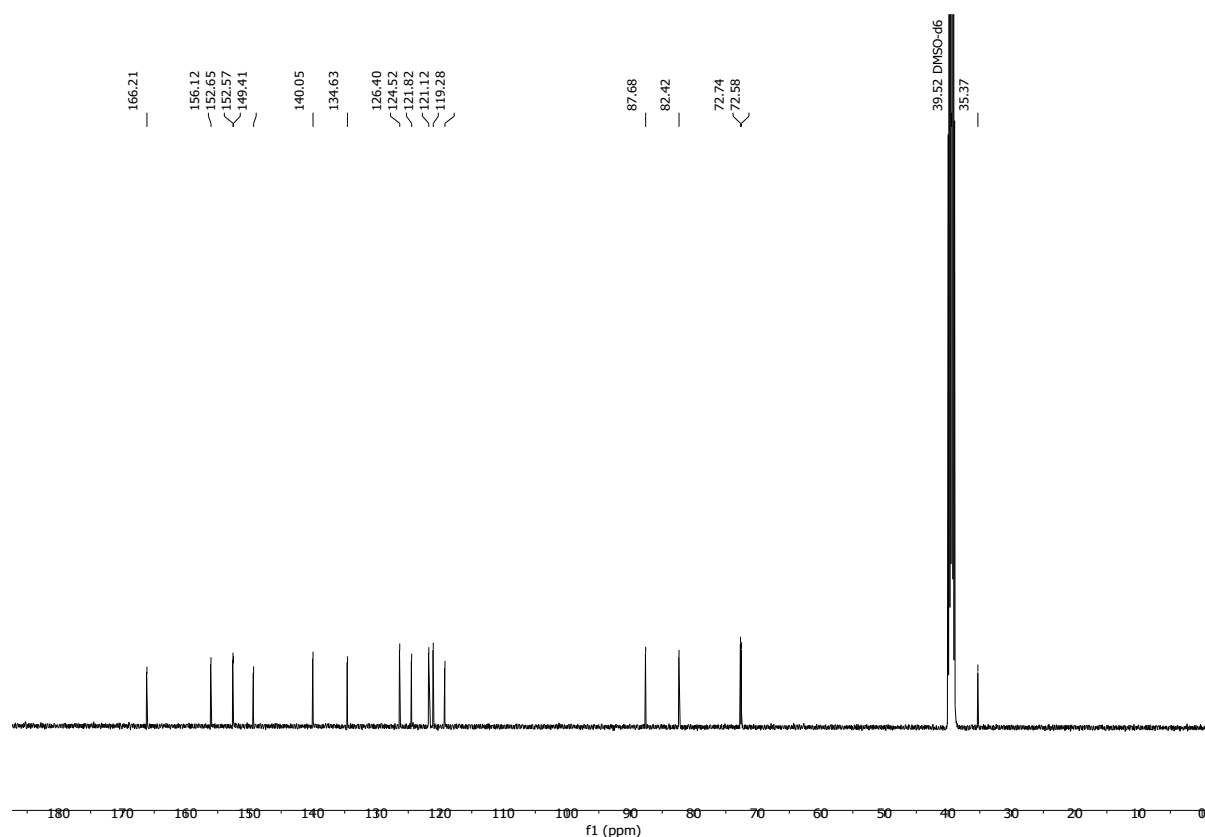

# **HPLC (2*R*,3*R*,4*S*,5*S*)-2-(6-aminopurin-9-yl)-5-(1,3-benzothiazol-2-ylsulfanylmethyl) tetrahydrofuran-3,4-diol (1)**

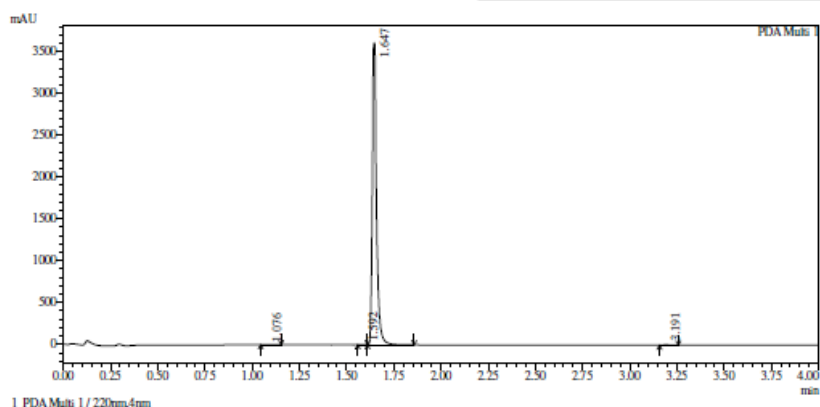

## Integration result

| PeakTable     |           |           |            |         |         |         |
|---------------|-----------|-----------|------------|---------|---------|---------|
| PDA Ch1 220nm |           |           |            |         |         |         |
| Peak#         | Ret. Time | USP Width | Resolution | Height  | Area    | Area %  |
| 1             | 1.076     | 0.070     | 0.000      | 1021    | 2906    | 0.051   |
| 2             | 1.592     | 0.090     | 6.453      | 601     | 1368    | 0.024   |
| 3             | 1.647     | 0.036     | 0.869      | 3609456 | 5666061 | 99.744  |
| 4             | 3.191     | 0.050     | 35.904     | 5442    | 10272   | 0.181   |
| Total         |           |           |            | 3616520 | 5680607 | 100.000 |

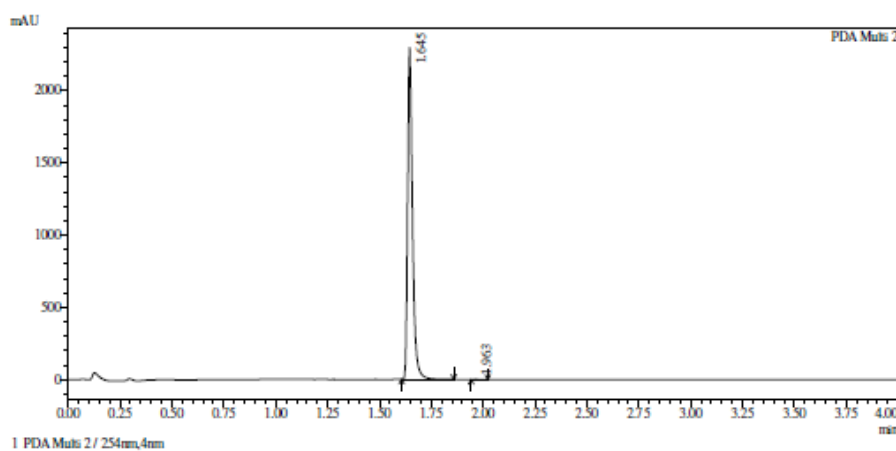

## Integration result

| PeakTable     |           |           |            |         |         |         |
|---------------|-----------|-----------|------------|---------|---------|---------|
| PDA Ch2 254nm |           |           |            |         |         |         |
| Peak#         | Ret. Time | USP Width | Resolution | Height  | Area    | Area %  |
| 1             | 1.645     | 0.044     | 0.000      | 2297104 | 3741542 | 99.968  |
| 2             | 1.963     | 0.051     | 6.742      | 596     | 1183    | 0.032   |
| Total         |           |           |            | 2297700 | 3742726 | 100.000 |

# **HRMS (2*R*,3*R*,4*S*,5*S*)-2-(6-aminopurin-9-yl)-5-(1,3-benzothiazol-2-ylsulfanylmethyl) tetrahydrofuran-3,4-diol (1)**

# Compound Table

| Label                          | Tgt Score | Mass Error (ppm) | Tgt Formula      | Obs. RT | Ref. Mass | Obs. Mass |
|--------------------------------|-----------|------------------|------------------|---------|-----------|-----------|
| Cpd 1: C17 H16 N6 O3 S2; 1.687 | 87.92     | 1.73             | C17 H16 N6 O3 S2 | 1.687   | 416.0725  | 416.0733  |

| Obs. m/z | Obs. RT | Obs. Mass | Tgt Formula      | Tgt Mass | Tgt Mass Error (ppm) | Find Cpd's Algorithm |
|----------|---------|-----------|------------------|----------|----------------------|----------------------|
| 417.0803 | 1.687   | 416.0733  | C17 H16 N6 O3 S2 | 416.0725 | 1.73                 | Find by Formula      |

## Compound Chromatograms

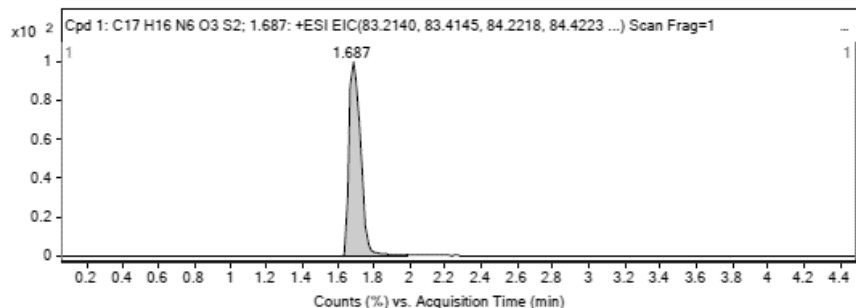

## MS Zoomed Spectrum

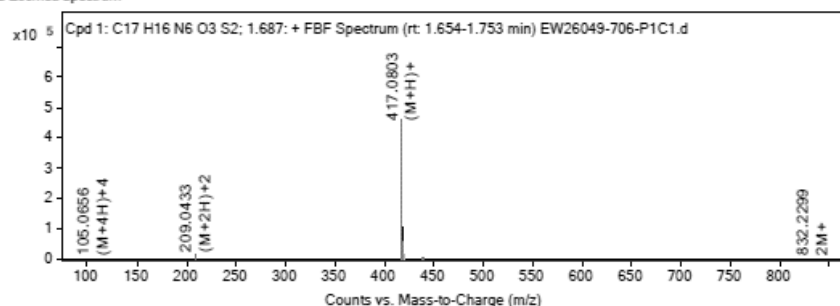

## MS Spectrum Peak List

| Obs. m/z | Charge | Abund  | Ion/Isotope |
|----------|--------|--------|-------------|
| 105.0656 | 4      | 462.41 | (M+4H)+4    |
| 209.0433 | 2      | 393.25 | M+2         |

|          |   |           |          |
|----------|---|-----------|----------|
| 209.0433 | 2 | 11833.25  | (M+2H)+2 |
| 209.5443 | 2 | 2876.12   | (M+2H)+2 |
| 210.0417 | 2 | 1317.21   | (M+2H)+2 |
| 417.0803 | 1 | 460341.03 | (M+H)+   |
| 418.0823 | 1 | 102473.61 | (M+H)+   |
| 419.0779 | 1 | 51885.25  | (M+H)+   |
| 439.0625 | 1 | 2859.47   | (M+Na)+  |
| 440.0637 | 1 | 622.13    | (M+Na)+  |

## MS Zoomed Spectrum

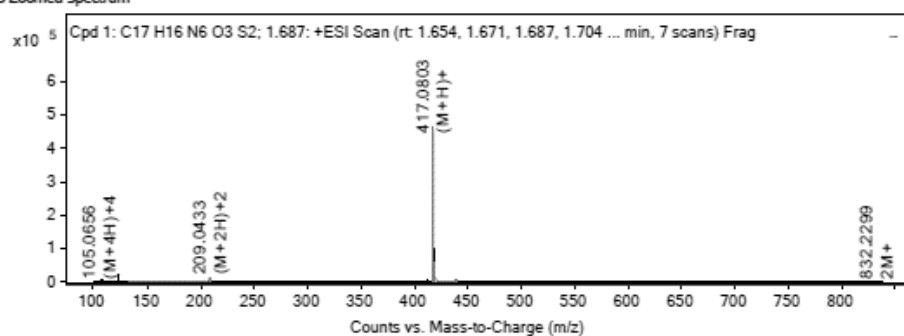

## MS Spectrum Peak List

| Obs. m/z | Charge | Abund     | Ion/Isotope | Tgt Mass Error (ppm) |
|----------|--------|-----------|-------------|----------------------|
| 105.0656 | 4      | 462.41    | (M+4H)+4    | -382.52              |
| 209.0433 | 2      | 393.25    | M+2         | -468.11              |
| 209.5443 | 2      | 11833.25  | (M+2H)+2    | 1.16                 |
| 209.5443 | 2      | 2876.12   | (M+2H)+2    | 2.16                 |
| 210.0417 | 2      | 1317.21   | (M+2H)+2    | 4.41                 |
| 417.0803 | 1      | 460341.03 | (M+H)+      | -1.14                |
| 418.0823 | 1      | 102473.61 | (M+H)+      | 0.02                 |
| 419.0779 | 1      | 51885.25  | (M+H)+      | 0.07                 |
| 439.0625 | 1      | 2859.47   | (M+Na)+     | -1.59                |
| 440.0637 | 1      | 622.13    | (M+Na)+     | 1.32                 |

--- End Of Report ---

**SFC (2*R*,3*R*,4*S*,5*S*)-2-(6-aminopurin-9-yl)-5-(1,3-benzothiazol-2-ylsulfanylmethyl) tetrahydrofuran-3,4-diol (1)**

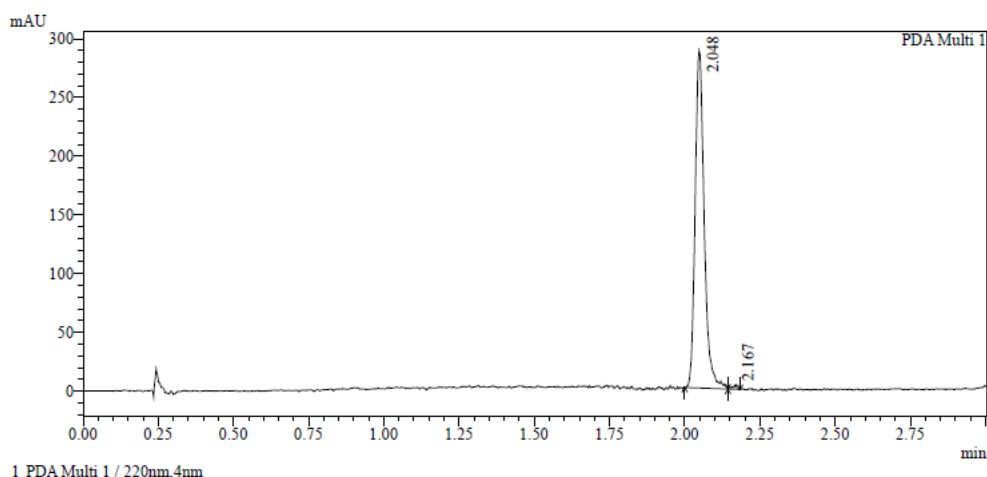

**Integration Results**

| PeakTable |           |           |            |        |        |         |
|-----------|-----------|-----------|------------|--------|--------|---------|
| Peak#     | Ret. Time | USP Width | Resolution | Height | Area   | Area %  |
| 1         | 2.048     | 0.057     | 0.000      | 276739 | 603800 | 99.391  |
| 2         | 2.167     | 0.034     | 2.579      | 2385   | 3697   | 0.609   |
| Total     |           |           |            | 279124 | 607496 | 100.000 |

**<sup>1</sup>H NMR (2*R*,3*R*,4*S*,5*S*)-2-(6-aminopurin-9-yl)-5-[(6-methyl-1,3-benzothiazol-2-yl)sulfanylmethyl] tetrahydrofuran-3,4-diol (2)**

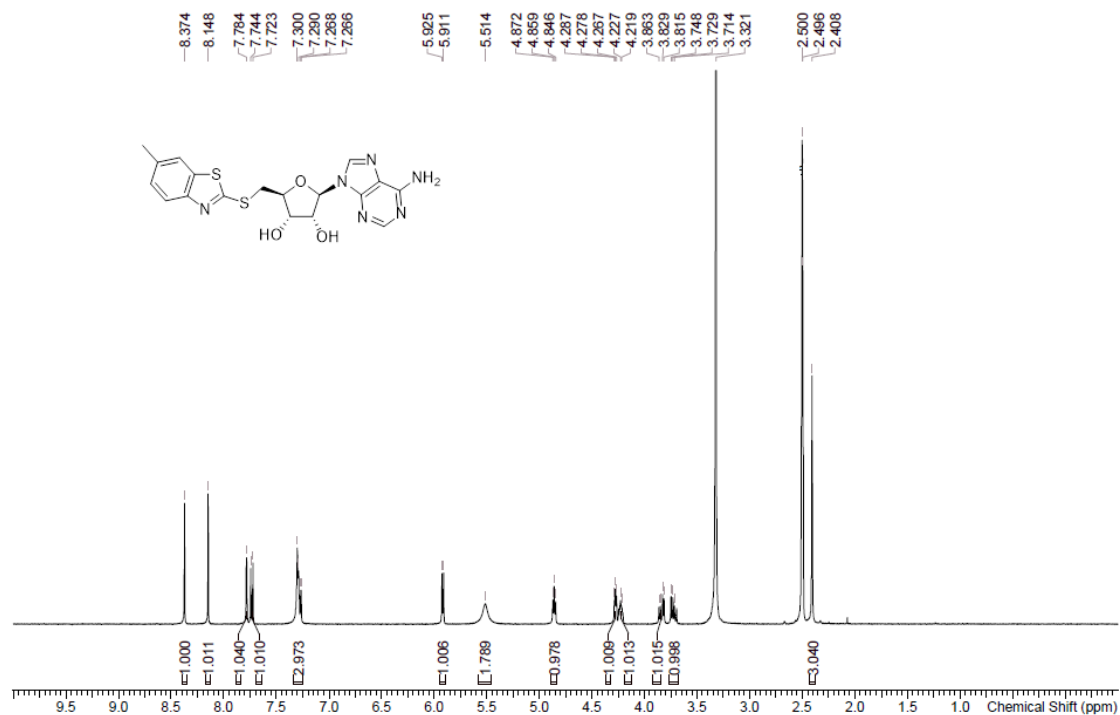

**<sup>13</sup>C NMR (2*R*,3*R*,4*S*,5*S*)-2-(6-aminopurin-9-yl)-5-[(6-methyl-1,3-benzothiazol-2-yl)sulfanylmethyl] tetrahydrofuran-3,4-diol (**2**)**

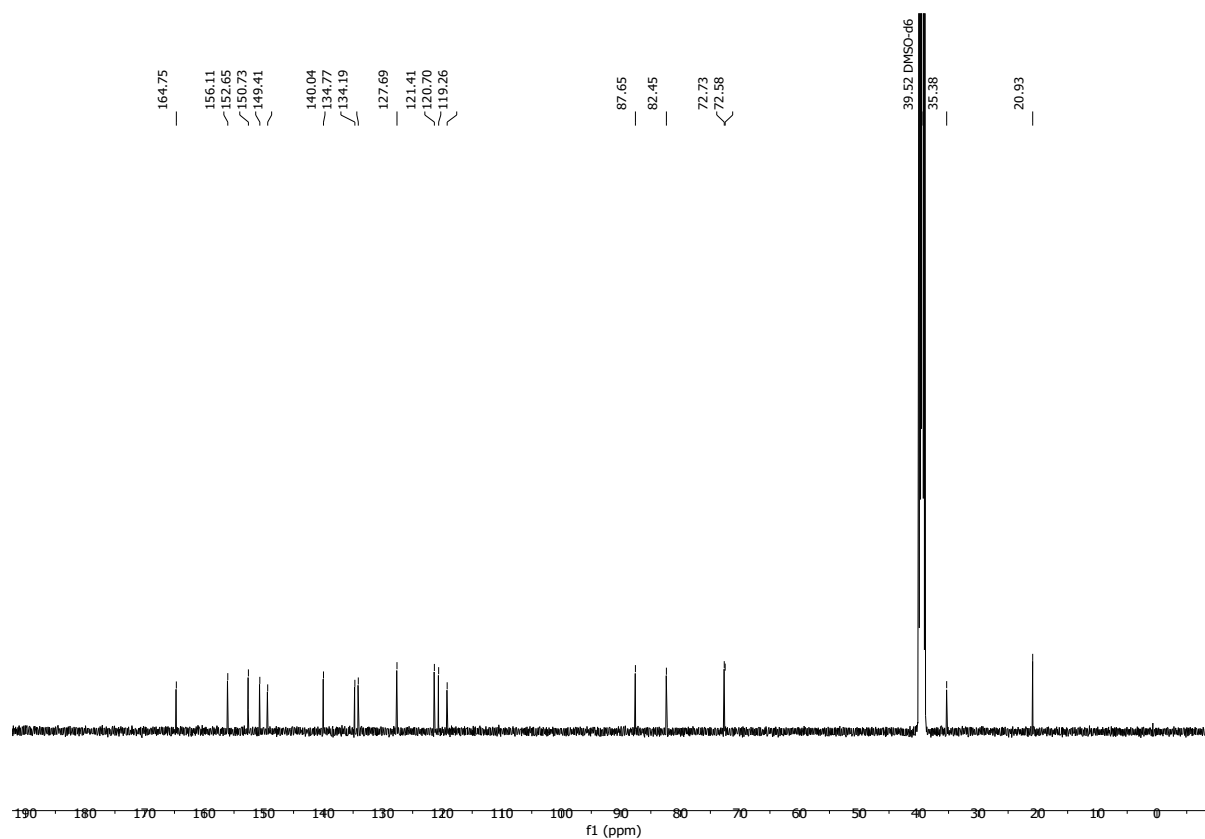

**HPLC (2*R*,3*R*,4*S*,5*S*)-2-(6-aminopurin-9-yl)-5-[(6-methyl-1,3-benzothiazol-2-yl)sulfanylmethyl] tetrahydrofuran-3,4-diol (**2**)**

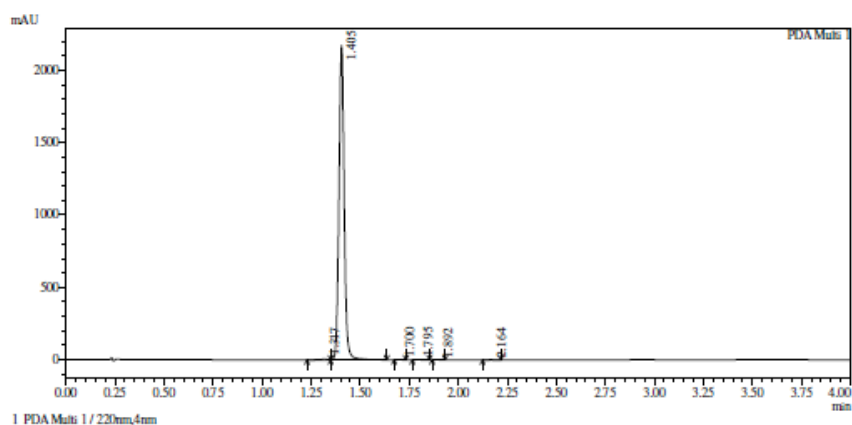

Integration result

| PDA Ch1 220nm |           | PeakTable |            |         |         |         |
|---------------|-----------|-----------|------------|---------|---------|---------|
| Peak#         | Ret. Time | USP Width | Resolution | Height  | Area    | Area %  |
| 1             | 1.317     | 0.126     | 0.000      | 4624    | 17873   | 0.438   |
| 2             | 1.405     | 0.049     | 0.999      | 2174873 | 4050027 | 99.268  |
| 3             | 1.700     | 0.045     | 6.315      | 1309    | 2157    | 0.053   |
| 4             | 1.795     | 0.052     | 1.960      | 1584    | 3148    | 0.077   |
| 5             | 1.892     | 0.041     | 2.099      | 1749    | 2600    | 0.064   |
| 6             | 2.164     | 0.069     | 4.957      | 1614    | 4085    | 0.100   |
| Total         |           |           |            | 2185753 | 4079890 | 100.000 |

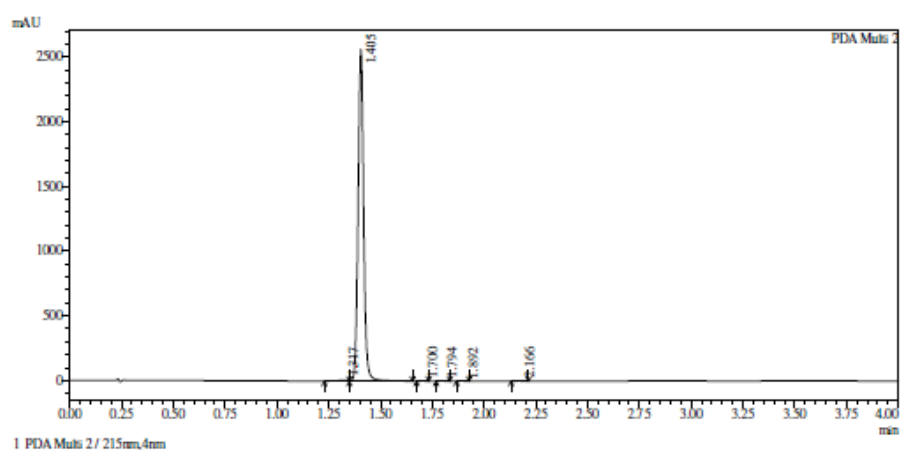

Integration result

| PeakTable |           |           |            |         |         |         |
|-----------|-----------|-----------|------------|---------|---------|---------|
| Peak#     | Ret. Time | USP Width | Resolution | Height  | Area    | Area %  |
| 1         | 1.317     | 0.117     | 0.000      | 5693    | 21767   | 0.451   |
| 2         | 1.405     | 0.049     | 1.062      | 2563316 | 4790990 | 99.355  |
| 3         | 1.700     | 0.045     | 6.302      | 988     | 1627    | 0.034   |
| 4         | 1.794     | 0.050     | 1.977      | 1090    | 1938    | 0.040   |
| 5         | 1.892     | 0.040     | 2.172      | 1766    | 2558    | 0.053   |
| 6         | 2.166     | 0.065     | 5.216      | 1329    | 3189    | 0.066   |
| Total     |           |           |            | 2574182 | 4822069 | 100.000 |

**HRMS** (2R,3R,4S,5S)-2-(6-aminopurin-9-yl)-5-[(6-methyl-1,3-benzothiazol-2-yl)sulfanylmethyl] tetrahydrofuran-3,4-diol (**2**)

Compound Table

| Label                          | Tgt Score | Mass Error (ppm) | Tgt Formula      | Obs. RT | Ref. Mass | Obs. Mass |
|--------------------------------|-----------|------------------|------------------|---------|-----------|-----------|
| Cpd 1: C18 H18 N6 O3 S2; 1.452 | 97.44     | 1.66             | C18 H18 N6 O3 S2 | 1.452   | 430.0882  | 430.0889  |

| Obs. m/z | Obs. RT | Obs. Mass | Tgt Formula      | Tgt Mass | Tgt Mass Error (ppm) | Find Cpd's Algorithm |
|----------|---------|-----------|------------------|----------|----------------------|----------------------|
| 216.0518 | 1.452   | 430.0889  | C18 H18 N6 O3 S2 | 430.0882 | 1.66                 | Find by Formula      |

Compound Chromatograms

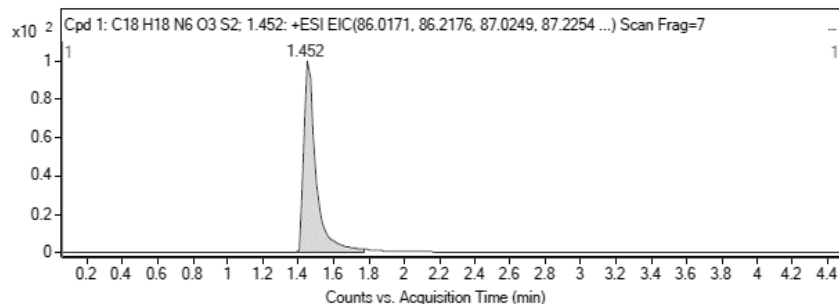

MS Zoomed Spectrum

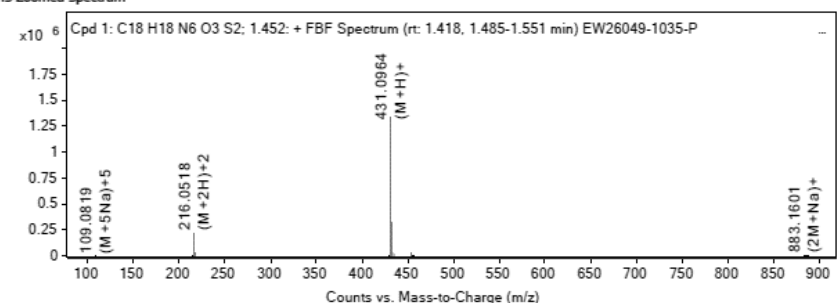

MS Spectrum Peak List

| Obs. m/z | Charge | Abund     | Ion/Isotope          |
|----------|--------|-----------|----------------------|
| 216.0518 | 2      | 220369.45 | (M+2H) <sup>2+</sup> |
| 216.553  | 2      | 53893.43  | (M+2H) <sup>2+</sup> |

|          |   |            |                      |
|----------|---|------------|----------------------|
| 217.0509 | 2 | 26690.65   | (M+2H) <sup>2+</sup> |
| 431.0964 | 1 | 1321847.88 | (M+H) <sup>+</sup>   |
| 432.0981 | 1 | 325651.41  | (M+H) <sup>+</sup>   |
| 433.0934 | 1 | 158972.36  | (M+H) <sup>+</sup>   |
| 453.0764 | 1 | 25026.08   | (M+Na) <sup>+</sup>  |
| 454.0789 | 1 | 6208.18    | (M+Na) <sup>+</sup>  |
| 455.0758 | 1 | 3294.22    | (M+Na) <sup>+</sup>  |
| 883.1601 | 1 | 1169.77    | (2M+Na) <sup>+</sup> |

MS Zoomed Spectrum

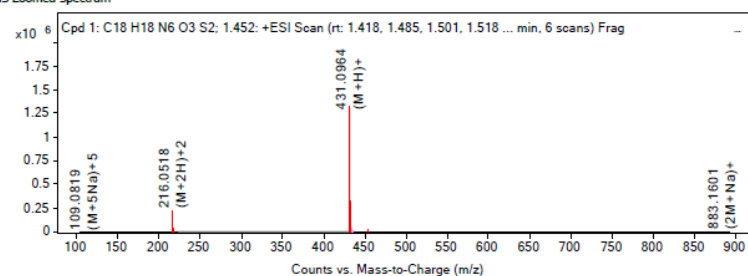

MS Spectrum Peak List

| Obs. m/z | Charge | Abund      | Ion/Isotope          | Tgt Mass Error (ppm) |
|----------|--------|------------|----------------------|----------------------|
| 216.0518 | 2      | 220369.45  | (M+2H) <sup>2+</sup> | -1.9                 |
| 216.553  | 2      | 53893.43   | (M+2H) <sup>2+</sup> | -1.66                |
| 217.0509 | 2      | 26690.65   | (M+2H) <sup>2+</sup> | -2.08                |
| 431.0964 | 1      | 1321847.88 | (M+H) <sup>+</sup>   | -2.29                |
| 432.0981 | 1      | 325651.41  | (M+H) <sup>+</sup>   | -0.16                |
| 433.0934 | 1      | 158972.36  | (M+H) <sup>+</sup>   | 0.18                 |
| 453.0764 | 1      | 25026.08   | (M+Na) <sup>+</sup>  | 2.22                 |
| 454.0789 | 1      | 6208.18    | (M+Na) <sup>+</sup>  | 2.23                 |
| 455.0758 | 1      | 3294.22    | (M+Na) <sup>+</sup>  | -0.31                |
| 883.1601 | 1      | 1169.77    | (2M+Na) <sup>+</sup> | 6.17                 |

--- End Of Report ---

<sup>1</sup>H NMR 2R,3R,4S,5S)-2-(6-aminopurin-9-yl)-5-[(5-methyl-1,3-benzothiazol-2-yl)sulfanylmethyl] tetrahydrofuran-3,4-diol (**3**)

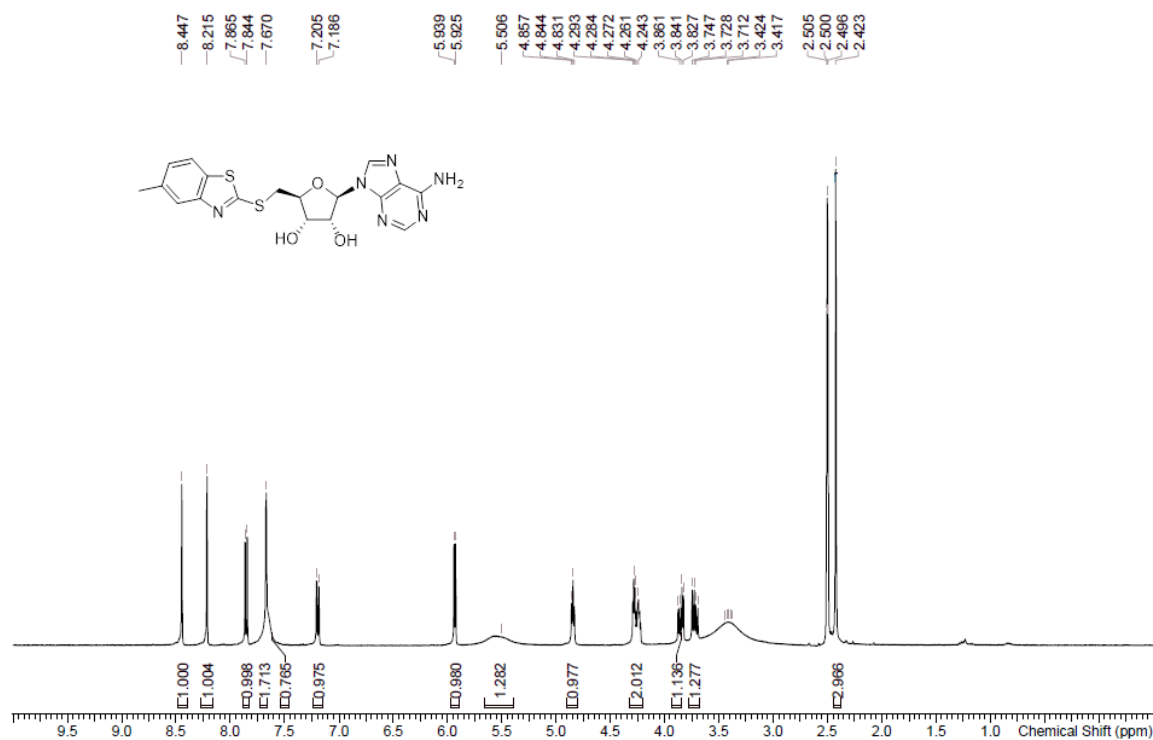

**HPLC** 2*R*,3*R*,4*S*,5*S*)-2-(6-aminopurin-9-yl)-5-[(5-methyl-1,3-benzothiazol-2-yl)sulfanylmethyl] tetrahydrofuran-3,4-diol (**3**)

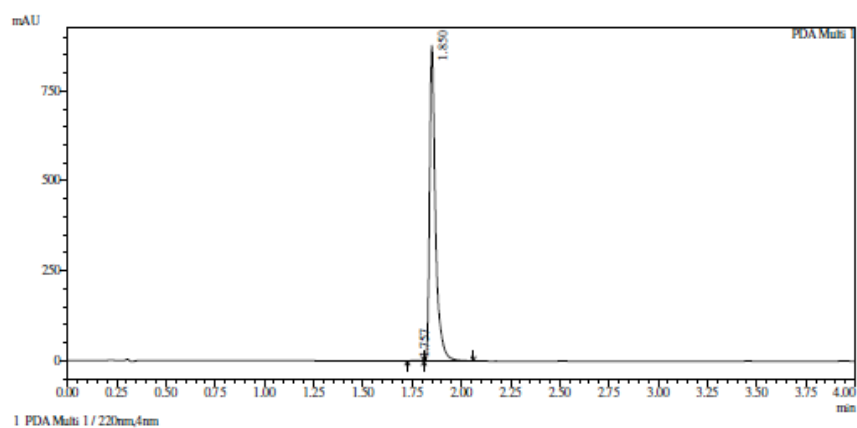

Integration result

| PeakTable |           |          |            |        |         |         |
|-----------|-----------|----------|------------|--------|---------|---------|
| Peak#     | Ret. Time | USPWidth | Resolution | Height | Area    | Area %  |
| 1         | 1.757     | 0.077    | 0.000      | 1117   | 3310    | 0.180   |
| 2         | 1.850     | 0.051    | 1.447      | 877291 | 1840677 | 99.820  |
| Total     |           |          |            | 878408 | 1843987 | 100.000 |



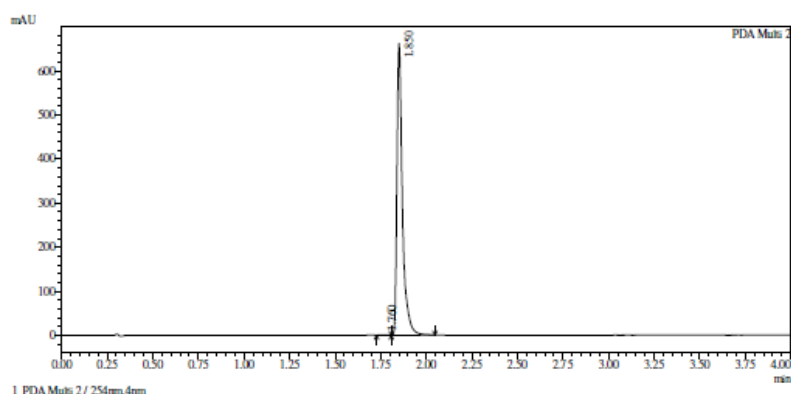

Integration result

| PeakTable |           |           |            |        |         |         |
|-----------|-----------|-----------|------------|--------|---------|---------|
| Peak#     | Ret. Time | USP Width | Resolution | Height | Area    | Area %  |
| 1         | 1.760     | 0.073     | 0.000      | 830    | 2335    | 0.167   |
| 2         | 1.850     | 0.051     | 1.451      | 662072 | 1395294 | 99.833  |
| Total     |           |           |            | 662902 | 1397629 | 100.000 |

**HPLC** 2*R*,3*R*,4*S*,5*S*)-2-(6-aminopurin-9-yl)-5-[(5-methyl-1,3-benzothiazol-2-yl)sulfanylmethyl] tetrahydrofuran-3,4-diol (**3**)

Compound Table

| Label                          | Tgt Score | Mass Error (ppm) | Tgt Formula      | Obs. RT | Ref. Mass | Obs. Mass |
|--------------------------------|-----------|------------------|------------------|---------|-----------|-----------|
| Cpd 1: C18 H18 N6 O3 S2; 1.455 | 97.84     | 4.46             | C18 H18 N6 O3 S2 | 1.455   | 430.0882  | 430.0901  |

| Obs. <i>m/z</i> | Obs. RT | Obs. Mass | Tgt Formula      | Tgt Mass | Tgt Mass Error (ppm) | Find Cmps Algorithm |
|-----------------|---------|-----------|------------------|----------|----------------------|---------------------|
| 453.0779        | 1.455   | 430.0901  | C18 H18 N6 O3 S2 | 430.0882 | 4.46                 | Find by Formula     |

Compound Chromatograms

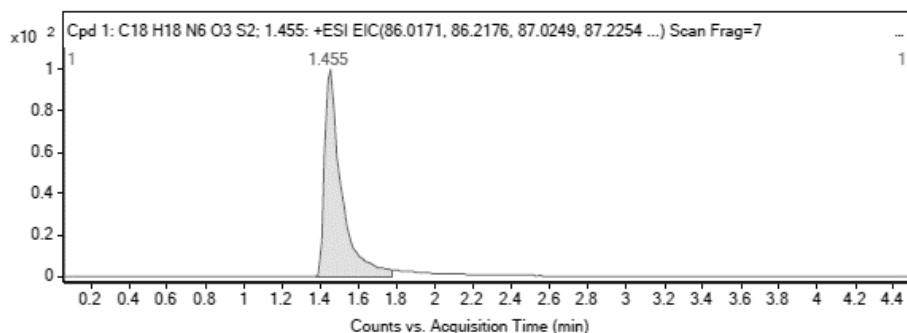

MS Zoomed Spectrum

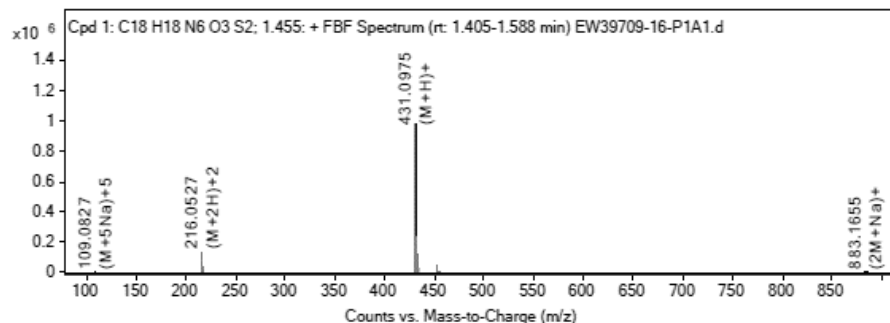

MS Spectrum Peak List

| Obs. <i>m/z</i> | Charge | Abund     | Ion/Isotope          |
|-----------------|--------|-----------|----------------------|
| 216.0527        | 2      | 131618.92 | (M+2H) <sup>2+</sup> |
| 216.5539        | 2      | 31740.88  | (M+2H) <sup>2+</sup> |

|          |   |           |                      |
|----------|---|-----------|----------------------|
| 217.0517 | 2 | 16412.5   | (M+2H) <sup>2+</sup> |
| 431.0975 | 1 | 981331.69 | (M+H) <sup>+</sup>   |
| 432.0993 | 1 | 237460.64 | (M+H) <sup>+</sup>   |
| 433.0948 | 1 | 115323.02 | (M+H) <sup>+</sup>   |
| 453.0779 | 1 | 46647.75  | (M+Na) <sup>+</sup>  |
| 454.0804 | 1 | 11184.8   | (M+Na) <sup>+</sup>  |
| 455.0761 | 1 | 5599.68   | (M+Na) <sup>+</sup>  |
| 883.1655 | 1 | 4335.82   | (2M+Na) <sup>+</sup> |

MS Zoomed Spectrum

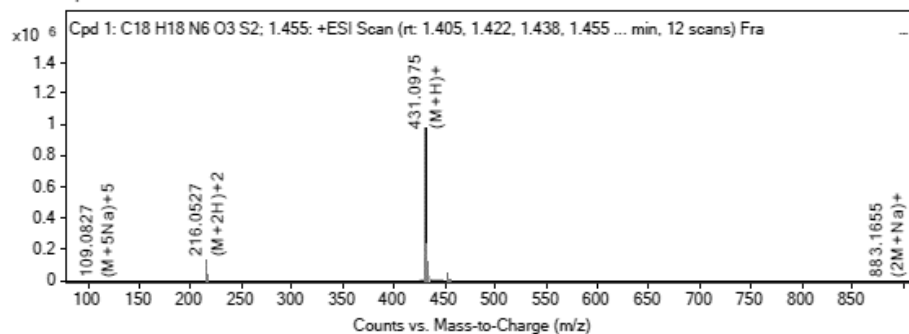

MS Spectrum Peak List

| Obs. m/z | Charge | Abund     | Ion/Isotope          | Tgt Mass Error (ppm) |
|----------|--------|-----------|----------------------|----------------------|
| 216.0527 | 2      | 131618.92 | (M+2H) <sup>2+</sup> | -6.37                |
| 216.5539 | 2      | 31740.88  | (M+2H) <sup>2+</sup> | -5.74                |
| 217.0517 | 2      | 16412.5   | (M+2H) <sup>2+</sup> | -5.75                |
| 431.0975 | 1      | 981331.69 | (M+H) <sup>+</sup>   | -4.85                |
| 432.0993 | 1      | 237460.64 | (M+H) <sup>+</sup>   | -2.93                |
| 433.0948 | 1      | 115323.02 | (M+H) <sup>+</sup>   | -2.45                |
| 453.0779 | 1      | 46647.75  | (M+Na) <sup>+</sup>  | -1.08                |
| 454.0804 | 1      | 11184.8   | (M+Na) <sup>+</sup>  | -1.02                |
| 455.0761 | 1      | 5599.68   | (M+Na) <sup>+</sup>  | -0.94                |
| 883.1655 | 1      | 4335.82   | (2M+Na) <sup>+</sup> | 0.07                 |

--- End Of Report ---

<sup>13</sup>C NMR (2R,3R,4S,5S)-2-(6-amino-9H-purin-9-yl)-5-((hexylthio)methyl)tetrahydrofuran-3,4-diol (**4**)

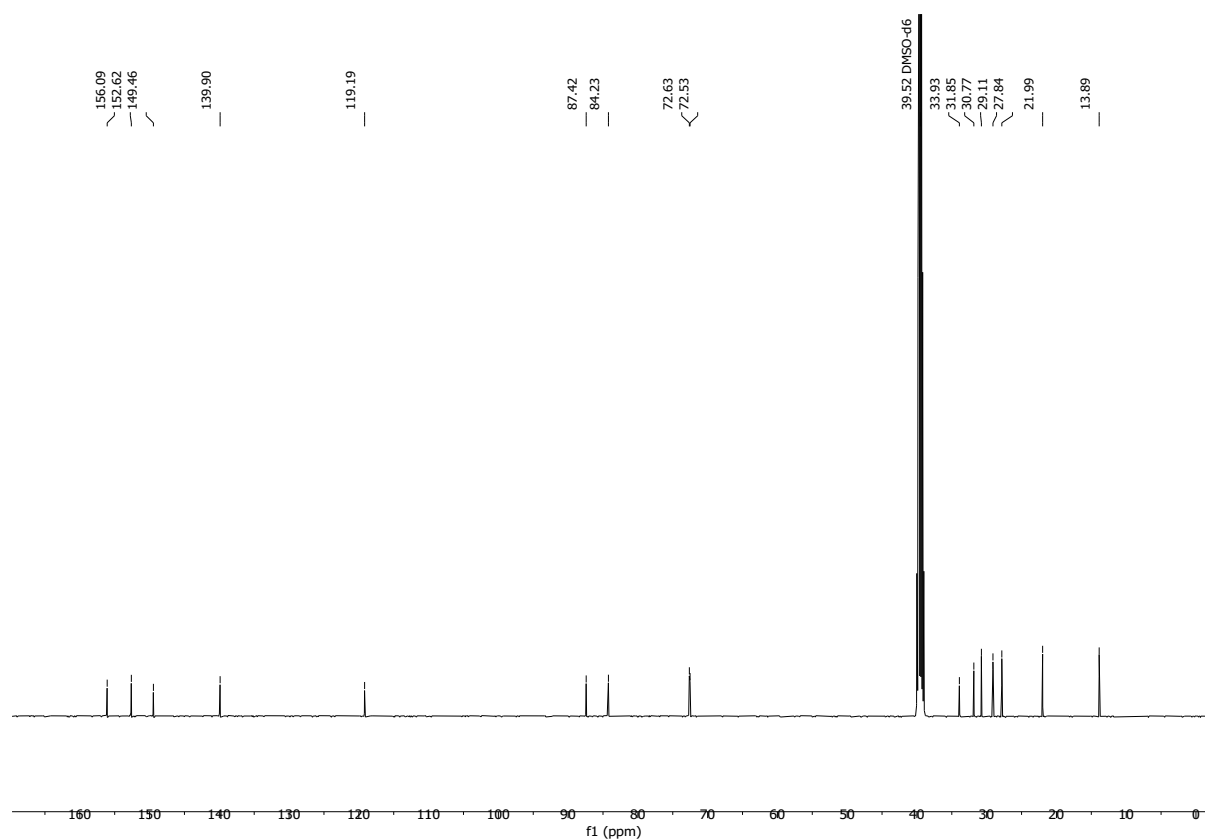

**<sup>13</sup>C NMR (2R,3R,4S,5S)-2-(6-amino-9H-purin-9-yl)-5-((naphthalen-2-ylthio)methyl)tetrahydrofuran-3,4-diol (6)**

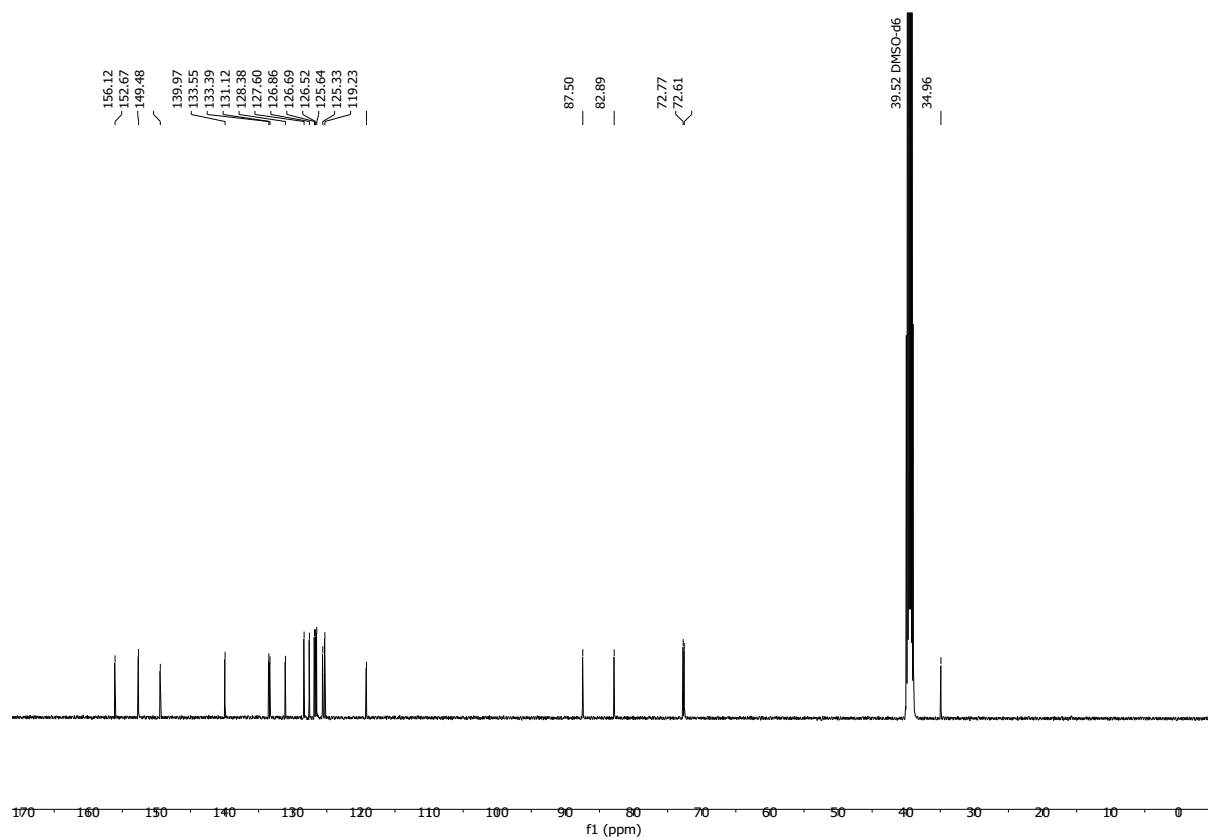

**<sup>1</sup>H NMR (2R,3R,4S,5S)-2-(6-aminopurin-9-yl)-5-(2-quinolylsulfanylmethyl) tetrahydrofuran-3,4-diol (7)**

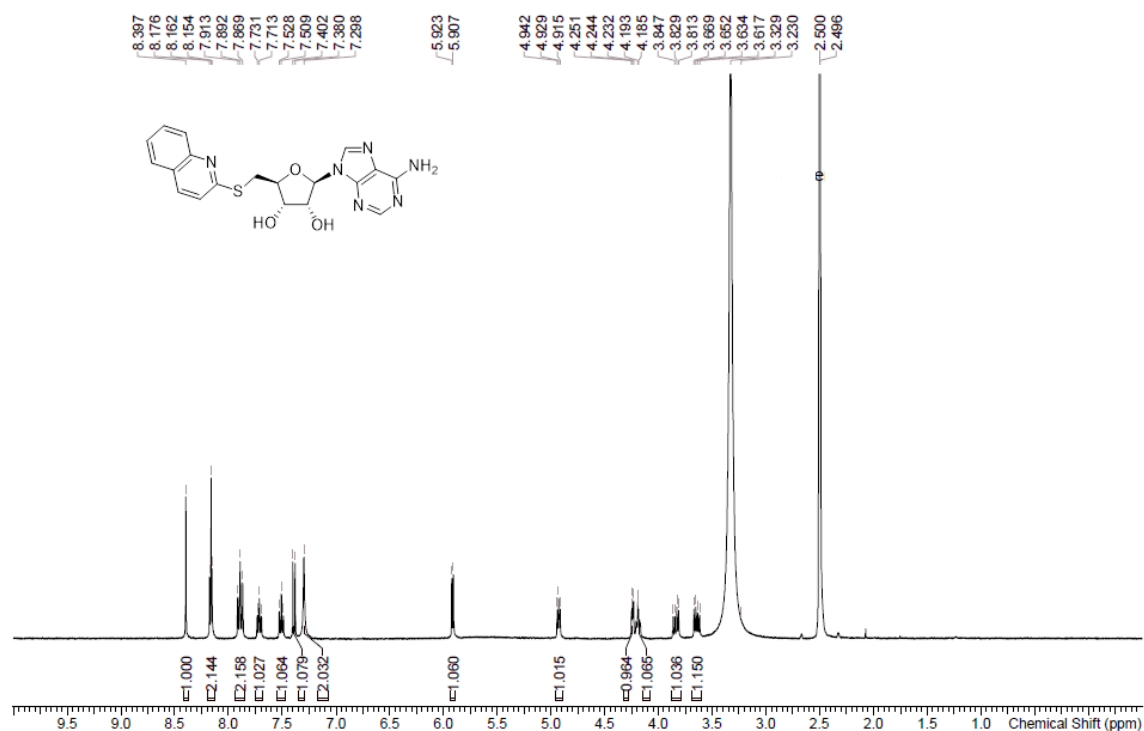

**<sup>13</sup>C NMR (2R,3R,4S,5S)-2-(6-aminopurin-9-yl)-5-(2-quinolylsulfanylmethyl) tetrahydrofuran-3,4-diol (7)**

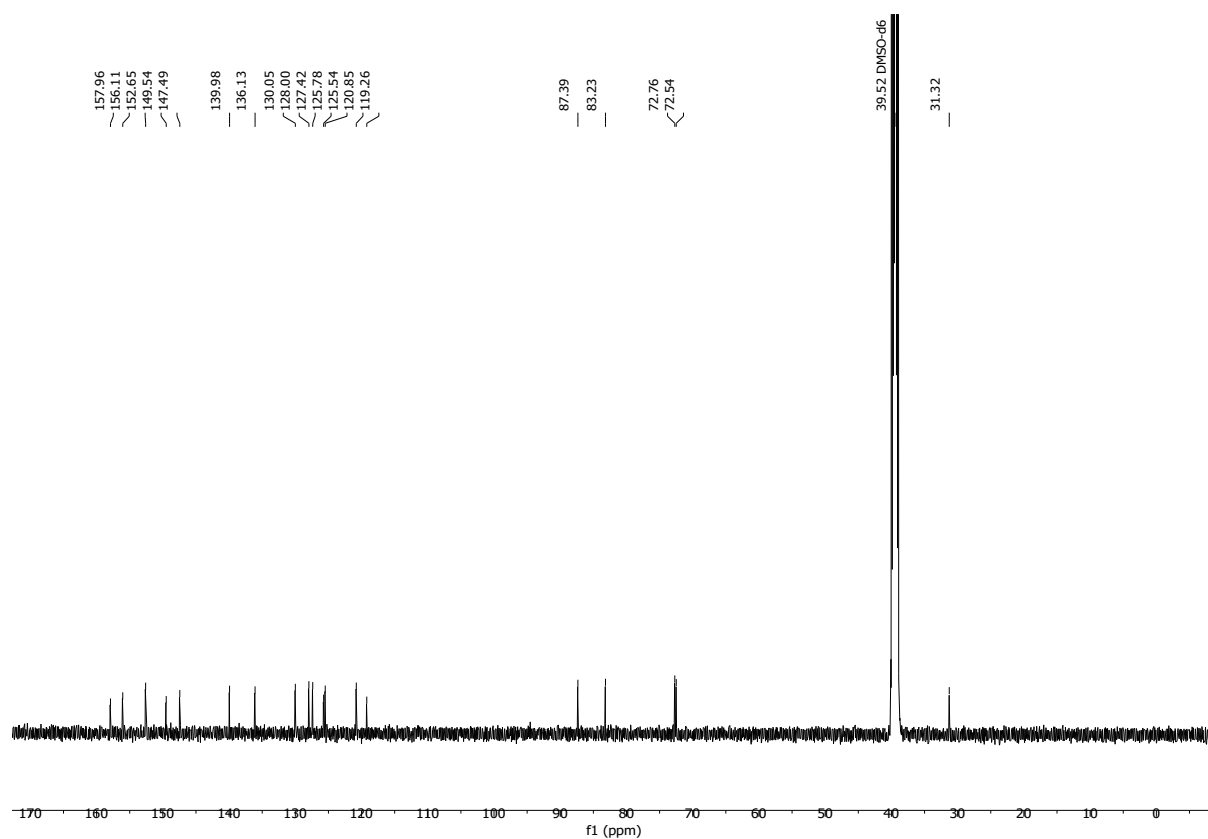

# HPLC (2R,3R,4S,5S)-2-(6-aminopurin-9-yl)-5-(2-quinolylsulfanylmethyl) tetrahydrofuran-3,4-diol (**7**)

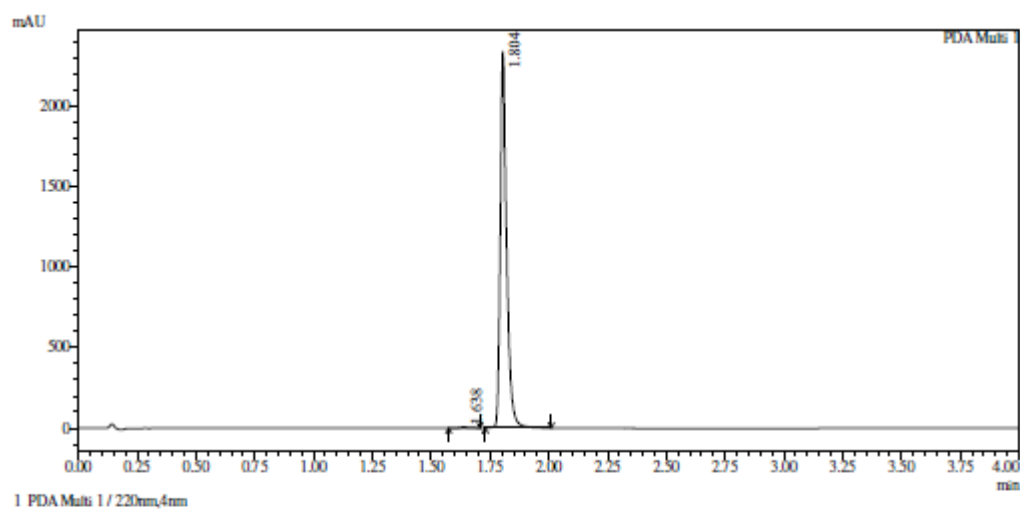

## Integration result

| PeakTable |           |           |            |         |         |         |
|-----------|-----------|-----------|------------|---------|---------|---------|
| Peak#     | Ret. Time | USP Width | Resolution | Height  | Area    | Area %  |
| 1         | 1.638     | 0.073     | 0.000      | 5837    | 16239   | 0.370   |
| 2         | 1.804     | 0.047     | 2.782      | 2342534 | 4378211 | 99.630  |
| Total     |           |           |            | 2348370 | 4394450 | 100.000 |

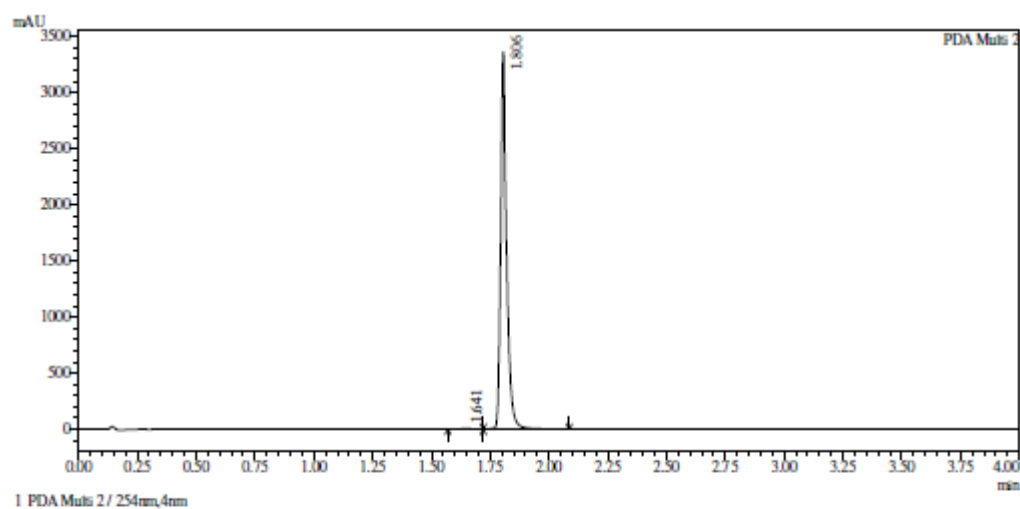

## Integration result

| PeakTable |           |           |            |         |         |         |
|-----------|-----------|-----------|------------|---------|---------|---------|
| Peak#     | Ret. Time | USP Width | Resolution | Height  | Area    | Area %  |
| 1         | 1.641     | 0.139     | 0.000      | 5120    | 23930   | 0.406   |
| 2         | 1.806     | 0.042     | 1.820      | 3360897 | 5864740 | 99.594  |
| Total     |           |           |            | 3366017 | 5888670 | 100.000 |

**HRMS (2R,3R,4S,5S)-2-(6-aminopurin-9-yl)-5-(2-quinolylsulfanylmethyl) tetrahydrofuran-3,4-diol (7)**

Compound Table

| Label                         | Tgt Score | Mass Error (ppm) | Tgt Formula     | Obs. RT | Ref. Mass | Obs. Mass |
|-------------------------------|-----------|------------------|-----------------|---------|-----------|-----------|
| Cpd 1: C19 H18 N6 O3 S; 1.659 | 99.01     | 2.99             | C19 H18 N6 O3 S | 1.659   | 410.1161  | 410.1173  |

| Obs. m/z | Obs. RT | Obs. Mass | Tgt Formula     | Tgt Mass | Tgt Mass Error (ppm) | Find Cpd's Algorithm |
|----------|---------|-----------|-----------------|----------|----------------------|----------------------|
| 433.1057 | 1.659   | 410.1173  | C19 H18 N6 O3 S | 410.1161 | 2.99                 | Find by Formula      |

Compound Chromatograms

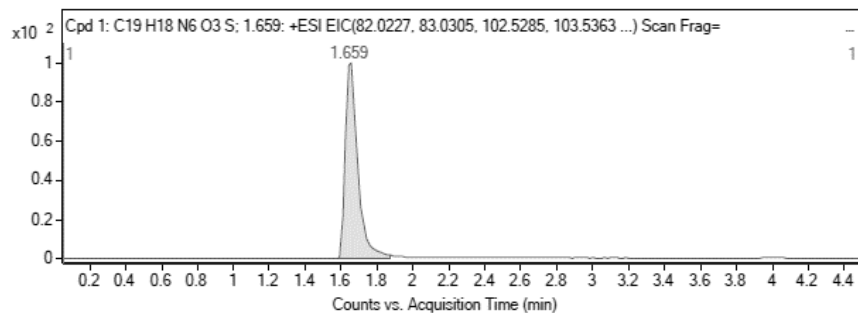

MS Zoomed Spectrum

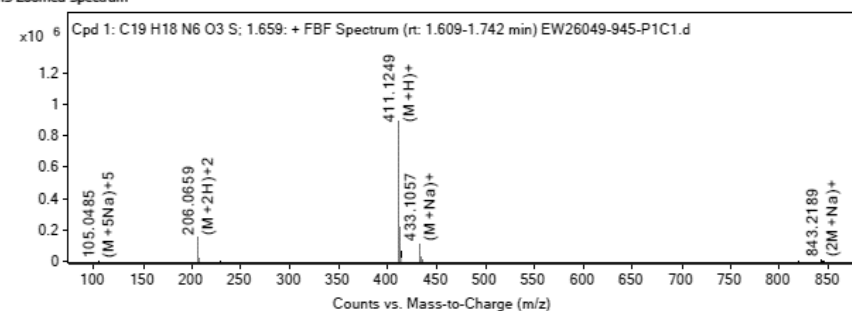

MS Spectrum Peak List

| Obs. m/z | Charge | Abund     | Ion/Isotope |
|----------|--------|-----------|-------------|
| 206.0659 | 2      | 152511.06 | (M+2H)+2    |
| 206.5671 | 2      | 37882.84  | (M+2H)+2    |

|          |   |           |          |
|----------|---|-----------|----------|
| 207.0661 | 2 | 12751.92  | (M+2H)+2 |
| 411.1249 | 1 | 894294.31 | (M+H)+   |
| 412.1269 | 1 | 214500.81 | (M+H)+   |
| 413.1242 | 1 | 65846.22  | (M+H)+   |
| 433.1057 | 1 | 111117.71 | (M+Na)+  |
| 434.1083 | 1 | 25837.89  | (M+Na)+  |
| 435.1059 | 1 | 8540.43   | (M+Na)+  |
| 843.2189 | 1 | 7718.13   | (2M+Na)+ |

MS Zoomed Spectrum

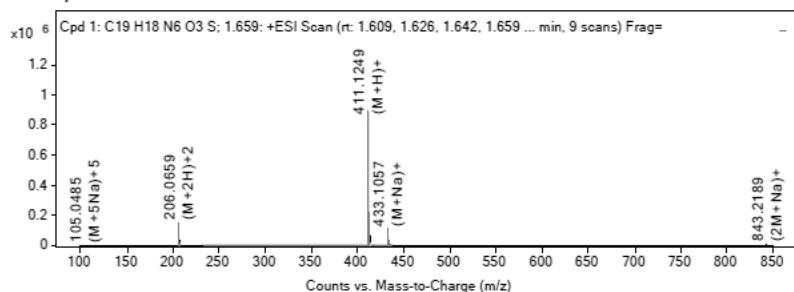

MS Spectrum Peak List

| Obs. m/z | Charge | Abund     | Ion/Isotope | Tgt Mass Error (ppm) |
|----------|--------|-----------|-------------|----------------------|
| 206.0659 | 2      | 152511.06 | (M+2H)+2    | -2.99                |
| 206.5671 | 2      | 37882.84  | (M+2H)+2    | -2.14                |
| 207.0661 | 2      | 12751.92  | (M+2H)+2    | -4.07                |
| 411.1249 | 1      | 894294.31 | (M+H)+      | -3.68                |
| 412.1269 | 1      | 214500.81 | (M+H)+      | -2.99                |
| 413.1242 | 1      | 65846.22  | (M+H)+      | -2.98                |
| 433.1057 | 1      | 111117.71 | (M+Na)+     | -0.9                 |
| 434.1083 | 1      | 25837.89  | (M+Na)+     | -0.65                |
| 435.1059 | 1      | 8540.43   | (M+Na)+     | -1.88                |
| 843.2189 | 1      | 7718.13   | (2M+Na)+    | 3.03                 |

--- End Of Report ---

**<sup>1</sup>H NMR (2R,3R,4S,5S)-2-(6-Aminopurin-9-yl)-5-[(6-methyl-2-quinolyl) sulfanylmethyl] tetrahydrofuran-3,4-diol (8)**

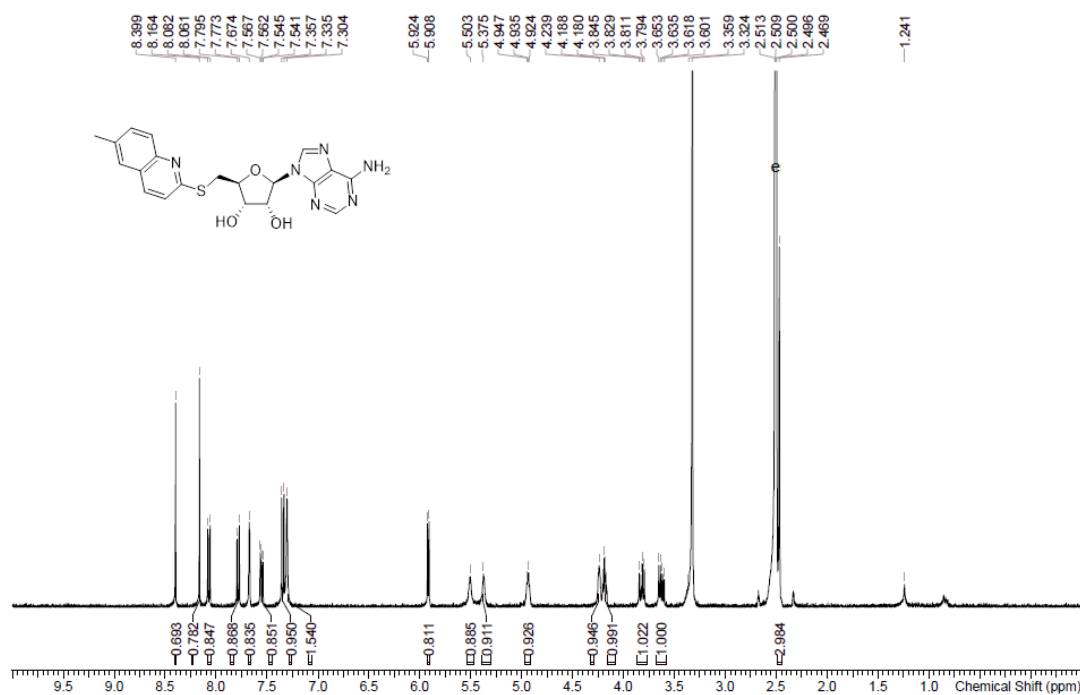

**<sup>13</sup>C NMR (2R,3R,4S,5S)-2-(6-Aminopurin-9-yl)-5-[(6-methyl-2-quinolyl) sulfanylmethyl] tetrahydrofuran-3,4-diol (8)**

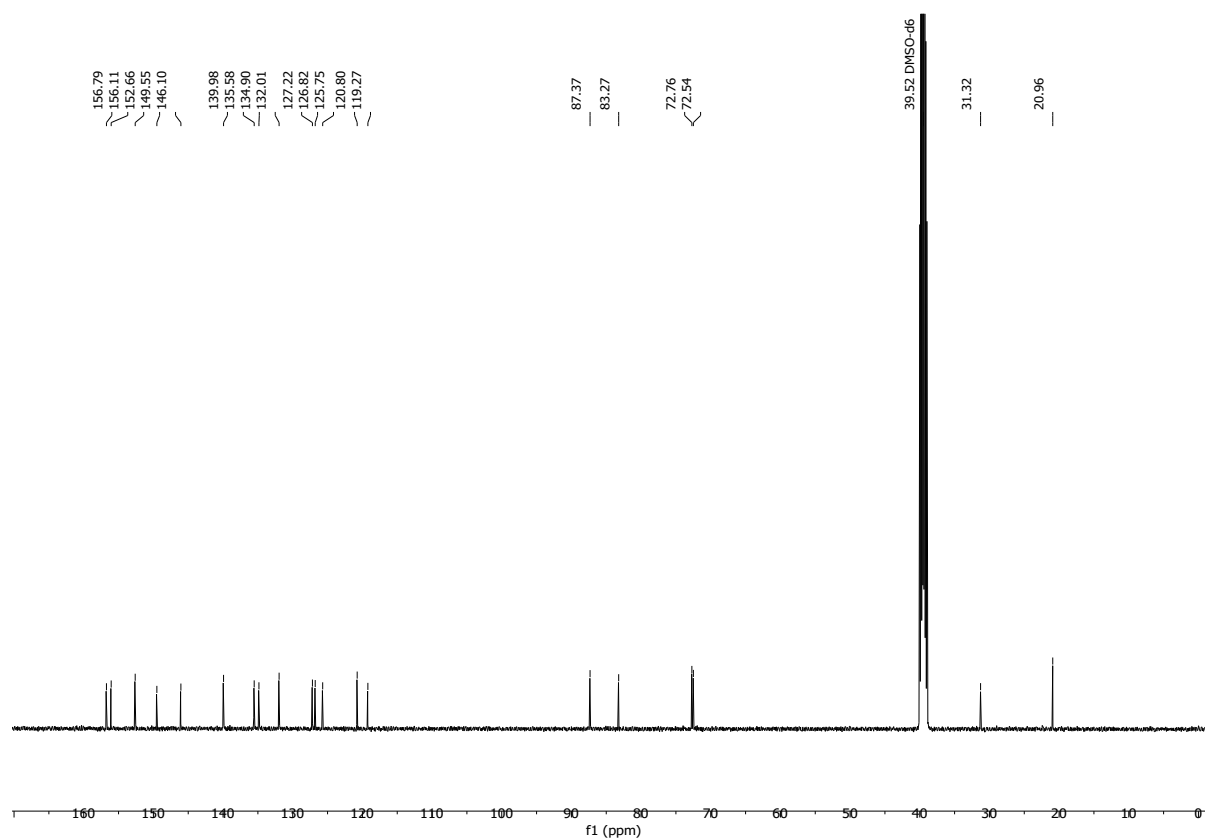

# **HPLC (2*R*,3*R*,4*S*,5*S*)-2-(6-Aminopurin-9-yl)-5-[(6-methyl-2-quinolyl) sulfanylmethyl] tetrahydrofuran-3,4-diol (**8**)**

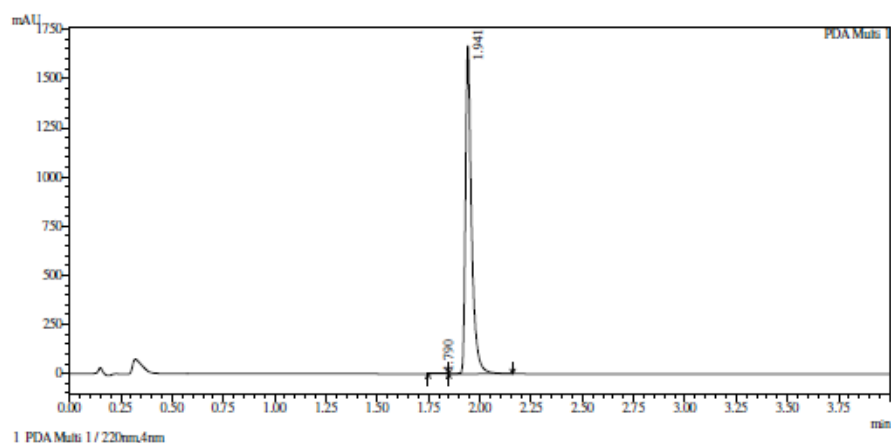

## Integration result

| PeakTable |           |           |            |         |         |         |
|-----------|-----------|-----------|------------|---------|---------|---------|
| Peak#     | Ret. Time | USP Width | Resolution | Height  | Area    | Area %  |
| 1         | 1.790     | 0.087     | 0.000      | 1481    | 4733    | 0.137   |
| 2         | 1.941     | 0.052     | 2.190      | 1668135 | 3439618 | 99.863  |
| Total     |           |           |            | 1669616 | 3444350 | 100.000 |

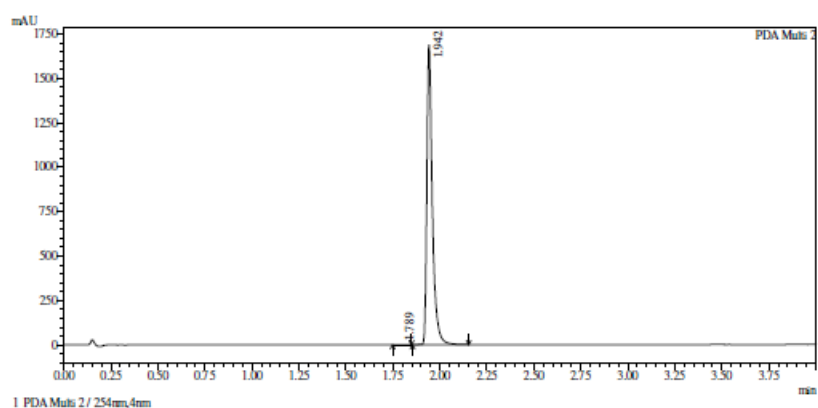

## Integration result

| PeakTable |           |           |            |         |         |         |
|-----------|-----------|-----------|------------|---------|---------|---------|
| Peak#     | Ret. Time | USP Width | Resolution | Height  | Area    | Area %  |
| 1         | 1.789     | 0.087     | 0.000      | 1574    | 4811    | 0.140   |
| 2         | 1.942     | 0.051     | 2.211      | 1688326 | 3438317 | 99.860  |
| Total     |           |           |            | 1689900 | 3443128 | 100.000 |

# **HRMS (2*R*,3*R*,4*S*,5*S*)-2-(6-Aminopurin-9-yl)-5-[(6-methyl-2-quinolyl) sulfanylmethyl] tetrahydrofuran-3,4-diol (**8**)**



Compound Table

| Label                         | Tgt Score | Mass Error (ppm) | Tgt Formula     | Obs. RT | Ref. Mass | Obs. Mass |
|-------------------------------|-----------|------------------|-----------------|---------|-----------|-----------|
| Cpd 1: C20 H20 N6 O3 S; 1.299 | 96.21     | 5.97             | C20 H20 N6 O3 S | 1.299   | 424.1318  | 424.1343  |

| Obs. m/z | Obs. RT | Obs. Mass | Tgt Formula     | Tgt Mass | Tgt Mass Error (ppm) | Find Cpd's Algorithm |
|----------|---------|-----------|-----------------|----------|----------------------|----------------------|
| 447.1219 | 1.299   | 424.1343  | C20 H20 N6 O3 S | 424.1318 | 5.97                 | Find by Formula      |

Compound Chromatograms

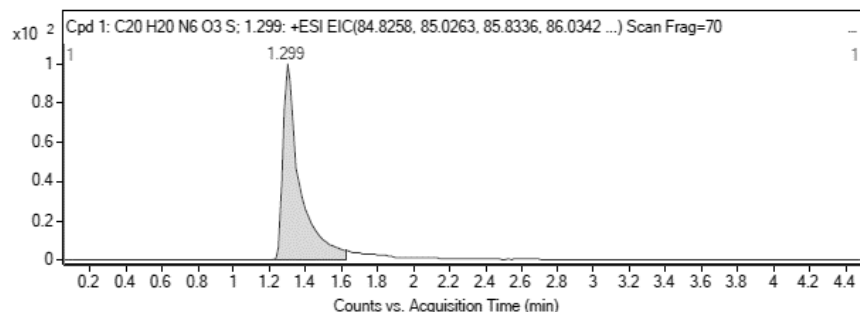

MS Zoomed Spectrum

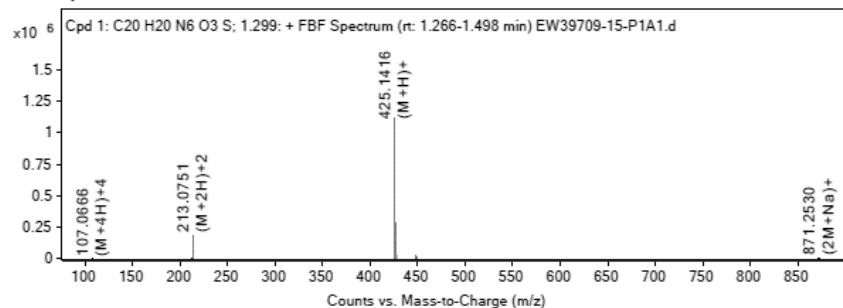

MS Spectrum Peak List

| Obs. m/z | Charge | Abund     | Ion/Isotope |
|----------|--------|-----------|-------------|
| 213.0751 | 2      | 186816.16 | (M+2H)+2    |
| 213.5762 | 2      | 47819.52  | (M+2H)+2    |

|          |   |            |          |
|----------|---|------------|----------|
| 214.0748 | 2 | 15425.82   | (M+2H)+2 |
| 425.1416 | 1 | 1121128.88 | (M+H)+   |
| 426.1435 | 1 | 287162.13  | (M+H)+   |
| 427.1407 | 1 | 88244.41   | (M+H)+   |
| 447.1219 | 1 | 20542.54   | (M+Na)+  |
| 448.1245 | 1 | 5157.79    | (M+Na)+  |
| 449.1234 | 1 | 1794.27    | (M+Na)+  |
| 871.253  | 1 | 1756.87    | (2M+Na)+ |

MS Zoomed Spectrum

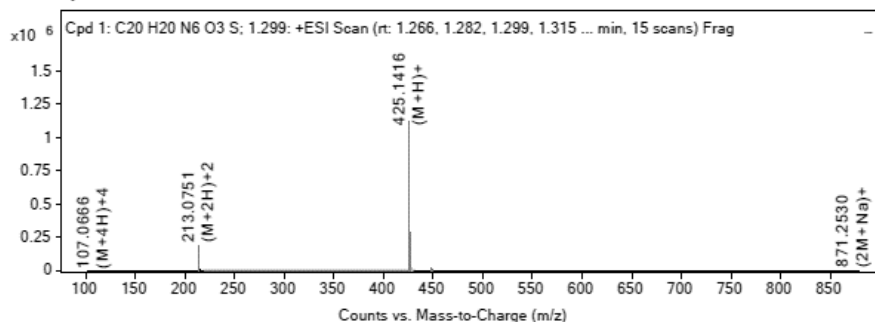

MS Spectrum Peak List

| Obs. m/z | Charge | Abund      | Ion/Isotope | Tgt Mass Error (ppm) |
|----------|--------|------------|-------------|----------------------|
| 213.0751 | 2      | 186816.16  | (M+2H)+2    | -8.98                |
| 213.5762 | 2      | 47819.52   | (M+2H)+2    | -7.74                |
| 214.0748 | 2      | 15425.82   | (M+2H)+2    | -7.85                |
| 425.1416 | 1      | 1121128.88 | (M+H)+      | -6.06                |
| 426.1435 | 1      | 287162.13  | (M+H)+      | -4.13                |
| 427.1407 | 1      | 88244.41   | (M+H)+      | -3.88                |
| 447.1219 | 1      | 20542.54   | (M+Na)+     | -2.12                |
| 448.1245 | 1      | 5157.79    | (M+Na)+     | -1.78                |
| 449.1234 | 1      | 1794.27    | (M+Na)+     | -5.35                |
| 871.253  | 1      | 1756.87    | (2M+Na)+    | -0.28                |

--- End Of Report ---

**<sup>1</sup>H NMR (2*R*,3*R*,4*S*,5*S*)-2-(6-Aminopurin-9-yl)-5-[(7-methyl-2-quinolyl) sulfanylmethyl] tetrahydrofuran-3,4-diol (9)**

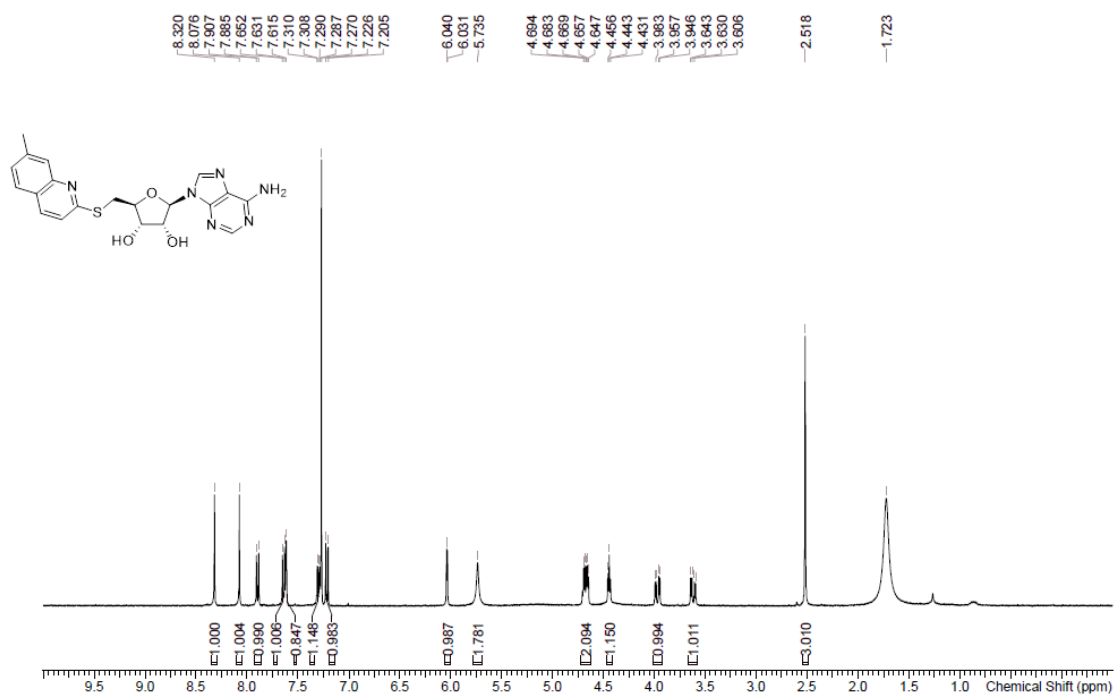

**HPLC (2*R*,3*R*,4*S*,5*S*)-2-(6-Aminopurin-9-yl)-5-[(7-methyl-2-quinolyl) sulfanylmethyl] tetrahydrofuran-3,4-diol (9)**

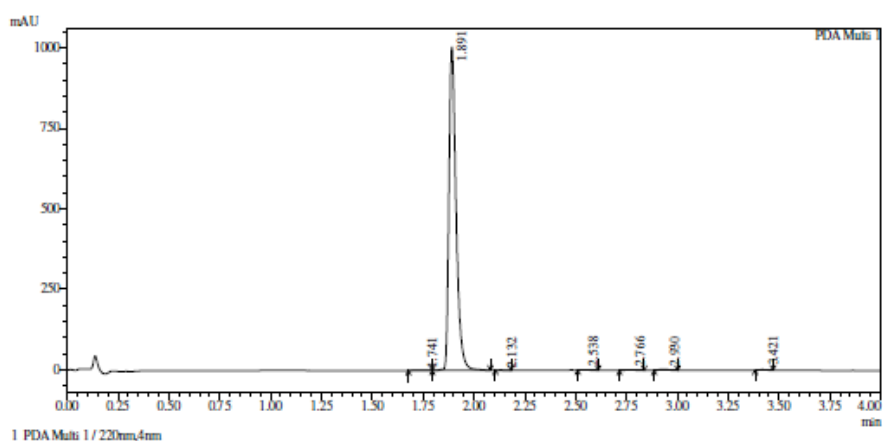

#### Integration result

| PeakTable     |           |           |            |         |         |         |
|---------------|-----------|-----------|------------|---------|---------|---------|
| PDA Ch1 220nm |           |           |            |         |         |         |
| Peak#         | Ret. Time | USP Width | Resolution | Height  | Area    | Area %  |
| 1             | 1.741     | 0.117     | 0.000      | 1219    | 5083    | 0.206   |
| 2             | 1.891     | 0.063     | 1.672      | 1003302 | 2440310 | 99.011  |
| 3             | 2.132     | 0.055     | 4.099      | 803     | 1649    | 0.067   |
| 4             | 2.538     | 0.076     | 6.182      | 688     | 1950    | 0.079   |
| 5             | 2.766     | 0.107     | 2.495      | 1213    | 4380    | 0.178   |
| 6             | 2.930     | 0.080     | 1.764      | 2718    | 7986    | 0.324   |
| 7             | 3.421     | 0.064     | 6.814      | 1339    | 3335    | 0.135   |
| Total         |           |           |            | 1011282 | 2464694 | 100.000 |

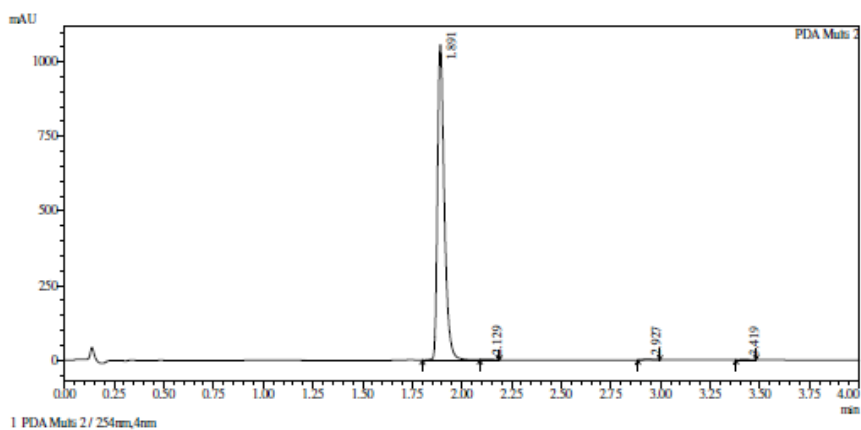

#### Integration result

| PeakTable     |           |           |            |         |         |         |
|---------------|-----------|-----------|------------|---------|---------|---------|
| PDA Ch2 254nm |           |           |            |         |         |         |
| Peak#         | Ret. Time | USP Width | Resolution | Height  | Area    | Area %  |
| 1             | 1.891     | 0.062     | 0.000      | 1057931 | 2545001 | 99.417  |
| 2             | 2.129     | 0.058     | 3.965      | 893     | 1942    | 0.076   |
| 3             | 2.927     | 0.079     | 11.690     | 2620    | 7715    | 0.301   |
| 4             | 3.419     | 0.070     | 6.602      | 1987    | 5268    | 0.206   |
| Total         |           |           |            | 1063431 | 2559927 | 100.000 |

**HRMS** (2*R*,3*R*,4*S*,5*S*)-2-(6-Aminopurin-9-yl)-5-[(7-methyl-2-quinolyl) sulfanylmethyl] tetrahydrofuran-3,4-diol (**9**)

Compound Table

| Label                         | Tgt Score | Mass Error (ppm) | Tgt Formula     | Obs. RT | Ref. Mass | Obs. Mass |
|-------------------------------|-----------|------------------|-----------------|---------|-----------|-----------|
| Cpd 1: C20 H20 N6 O3 S; 4.174 | 97.42     | -11.9            | C20 H20 N6 O3 S | 4.174   | 424.1318  | 424.1267  |

| Obs. m/z | Obs. RT | Obs. Mass | Tgt Formula     | Tgt Mass | Tgt Mass Error (ppm) | Find Cpd's Algorithm |
|----------|---------|-----------|-----------------|----------|----------------------|----------------------|
| 425.1391 | 4.174   | 424.1267  | C20 H20 N6 O3 S | 424.1318 | -11.9                | Find by Formula      |

Compound Chromatograms

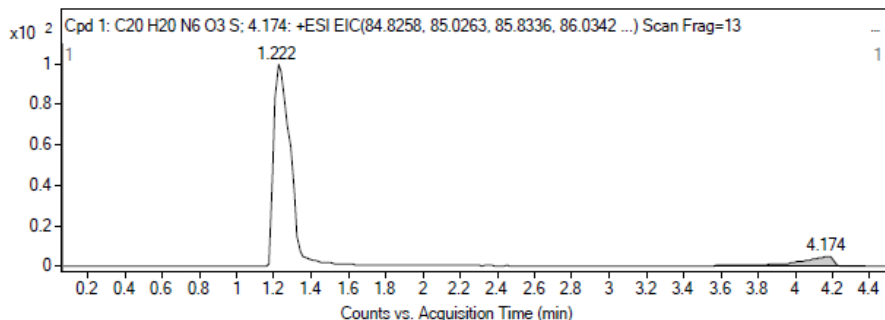

MS Zoomed Spectrum

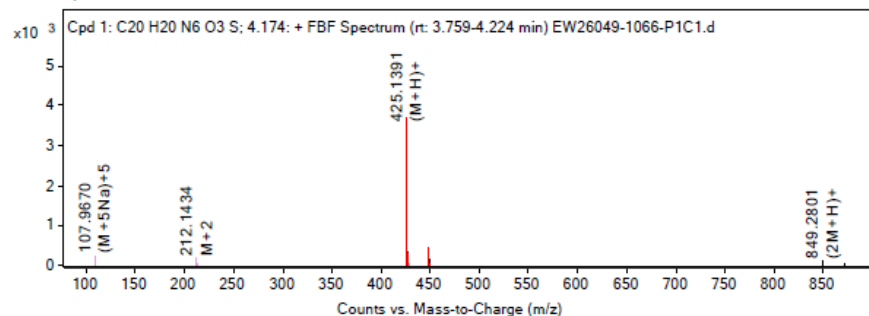

MS Spectrum Peak List

| Obs. m/z | Charge | Abund  | Ion/Isotope |
|----------|--------|--------|-------------|
| 107.967  | 5      | 240.43 | [M+5Na]+    |

|          |   |         |          |
|----------|---|---------|----------|
| 212.1434 | 2 | 163.47  | [M+2]    |
| 425.1391 | 1 | 3628.15 | [M+H]+   |
| 426.1412 | 1 | 989.4   | [M+H]+   |
| 427.14   | 1 | 342.28  | [M+H]+   |
| 447.1164 | 1 | 408.88  | [M+Na]+  |
| 448.1233 | 1 | 158.47  | [M+Na]+  |
| 848.2738 | 1 | 102.45  | [2M]+    |
| 849.2801 | 1 | 114.34  | [2M+H]+  |
| 871.2689 | 1 | 67.29   | [2M+Na]+ |

MS Zoomed Spectrum

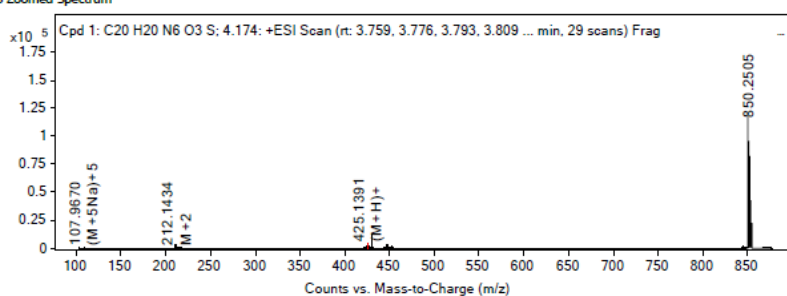

MS Spectrum Peak List

| Obs. m/z | Charge | Abund   | Ion/Isotope | Tgt Mass Error (ppm) |
|----------|--------|---------|-------------|----------------------|
| 107.967  | 5      | 240.43  | [M+5Na]+    | 454.34               |
| 212.1434 | 2      | 163.47  | [M+2]       | -368.17              |
| 425.1391 | 1      | 3628.15 | [M+H]+      | -0.11                |
| 426.1412 | 1      | 989.4   | [M+H]+      | 1.22                 |
| 427.14   | 1      | 342.28  | [M+H]+      | -2.29                |
| 447.1164 | 1      | 408.88  | [M+Na]+     | 10.15                |
| 448.1233 | 1      | 158.47  | [M+Na]+     | 0.95                 |
| 848.2738 | 1      | 102.45  | [2M]+       | -12.73               |
| 849.2801 | 1      | 114.34  | [2M+H]+     | -10.35               |
| 871.2689 | 1      | 67.29   | [2M+Na]+    | -18.5                |

--- End Of Report ---

<sup>1</sup>H NMR (2R,3R,4S,5S)-2-(6-Aminopurin-9-yl)-5-(7-quinolylsulfanylmethyl) tetrahydrofuran-3,4-diol (**10**)

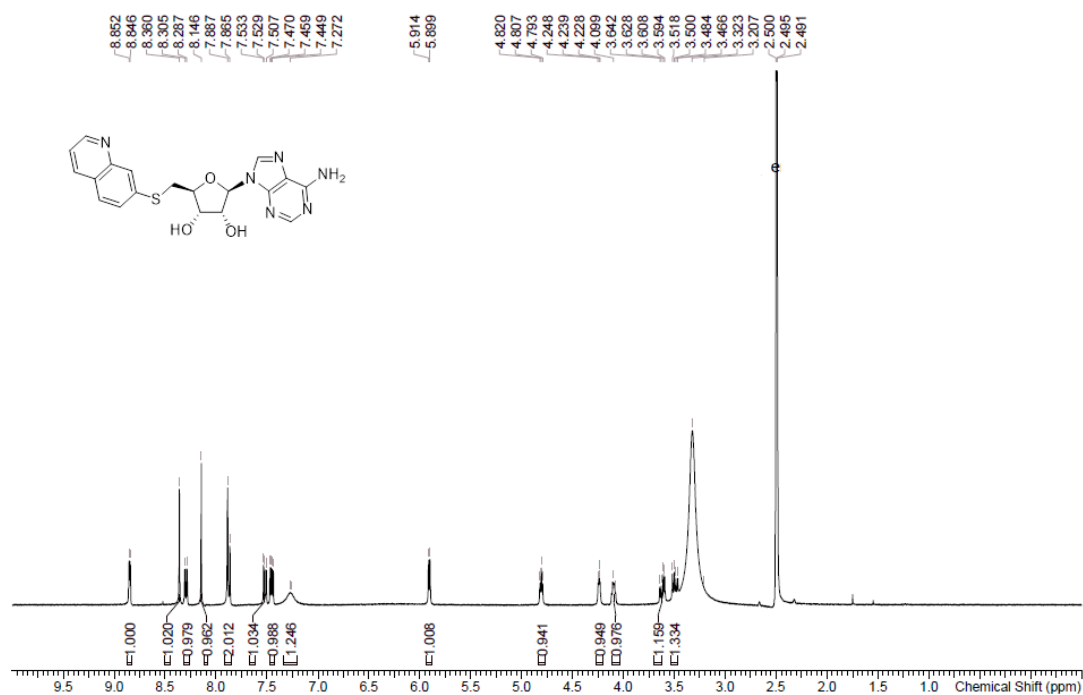

<sup>13</sup>C NMR (2R,3R,4S,5S)-2-(6-Aminopurin-9-yl)-5-(7-quinolylsulfanylmethyl) tetrahydrofuran-3,4-diol (10)

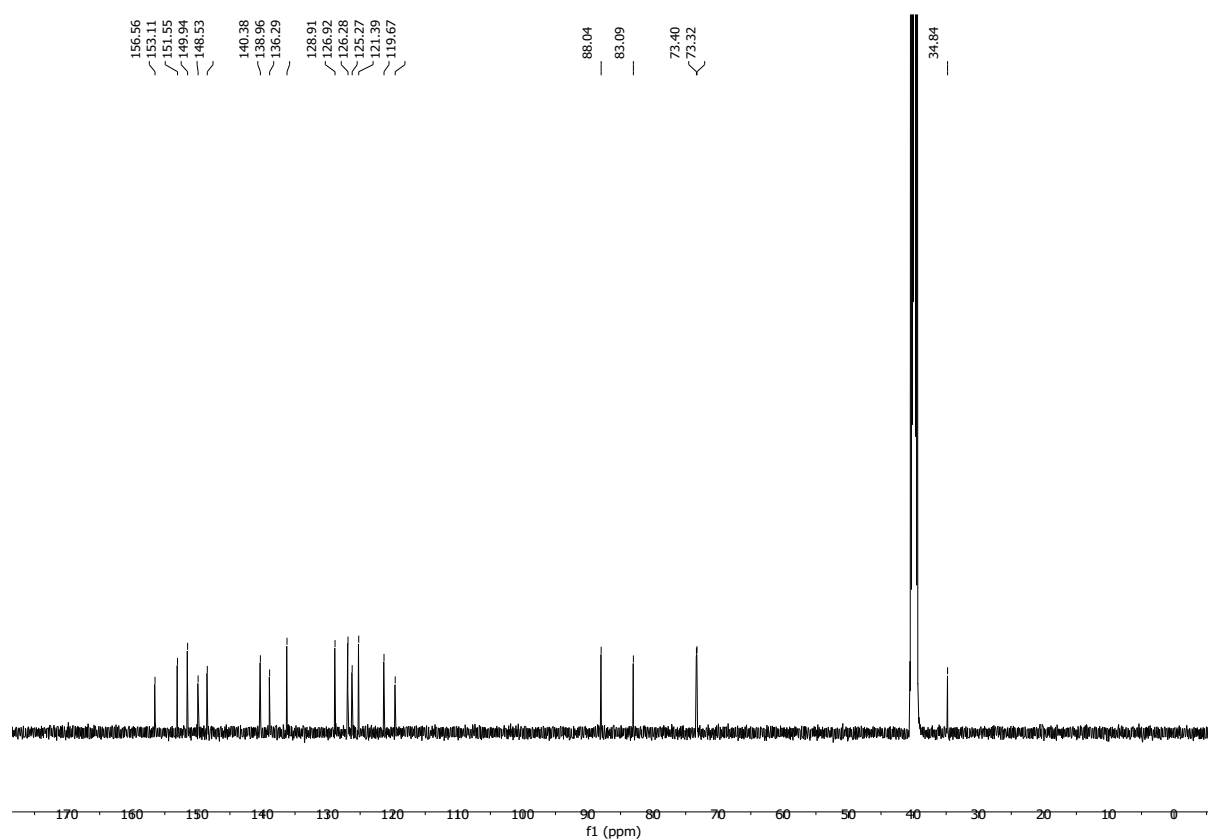

# **HPLC (2*R*,3*R*,4*S*,5*S*)-2-(6-Aminopurin-9-yl)-5-(7-quinolylsulfanylmethyl) tetrahydrofuran-3,4-diol (**10**)**

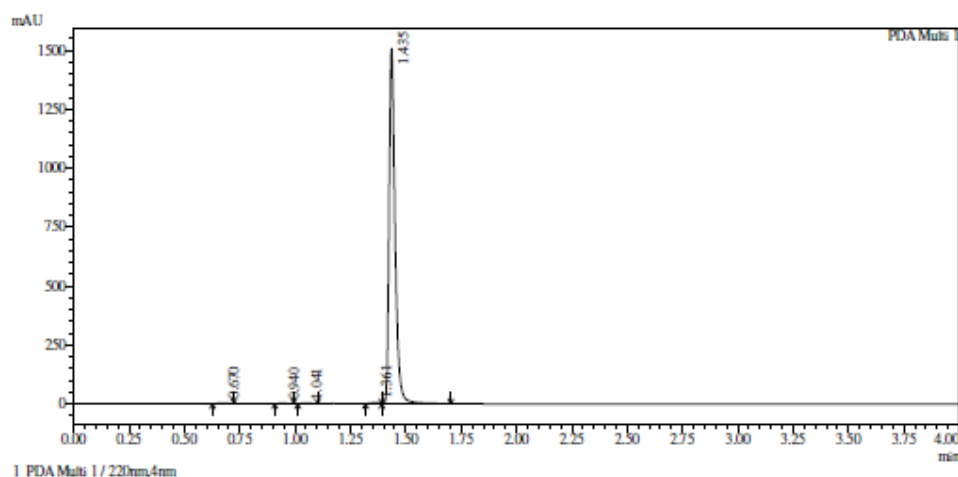

## Integration result

| PeakTable |           |           |            |         |         |         |
|-----------|-----------|-----------|------------|---------|---------|---------|
| Peak#     | Ret. Time | USP Width | Resolution | Height  | Area    | Area %  |
| 1         | 0.670     | 0.072     | 0.000      | 2617    | 6767    | 0.237   |
| 2         | 0.940     | 0.067     | 3.905      | 1108    | 2773    | 0.097   |
| 3         | 1.041     | 0.059     | 1.598      | 2104    | 4841    | 0.169   |
| 4         | 1.361     | 0.093     | 4.222      | 4233    | 12102   | 0.424   |
| 5         | 1.435     | 0.049     | 1.049      | 1506546 | 2830566 | 99.073  |
| Total     |           |           |            | 1516608 | 2857049 | 100.000 |

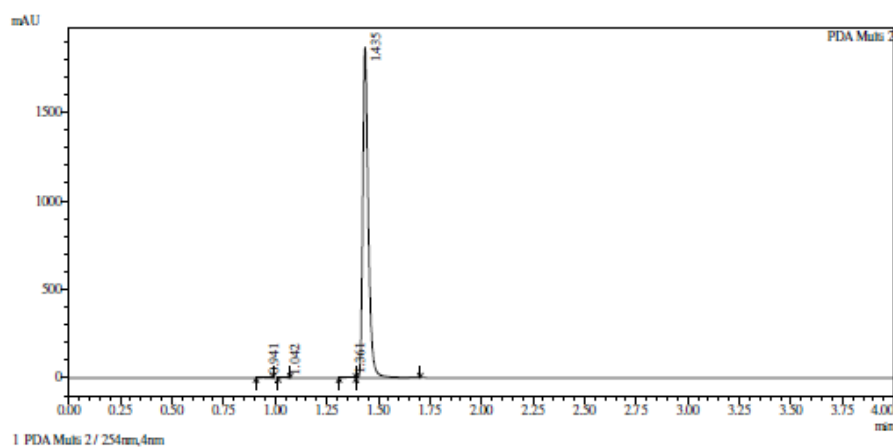

## Integration result

| PeakTable |           |           |            |         |         |         |
|-----------|-----------|-----------|------------|---------|---------|---------|
| Peak#     | Ret. Time | USP Width | Resolution | Height  | Area    | Area %  |
| 1         | 0.941     | 0.068     | 0.000      | 664     | 1662    | 0.047   |
| 2         | 1.042     | 0.050     | 1.698      | 875     | 1539    | 0.044   |
| 3         | 1.361     | 0.093     | 4.481      | 4539    | 12849   | 0.367   |
| 4         | 1.435     | 0.049     | 1.049      | 1867227 | 3483963 | 99.541  |
| Total     |           |           |            | 1873304 | 3500014 | 100.000 |

# **HRMS (2*R*,3*R*,4*S*,5*S*)-2-(6-Aminopurin-9-yl)-5-(7-quinolylsulfanylmethyl) tetrahydrofuran-3,4-diol (**10**)**

Compound Table

| Label                                                                         | Tgt Score | Mass Error (ppm) | Tgt Formula                                                     | Obs. RT | Ref. Mass | Obs. Mass |
|-------------------------------------------------------------------------------|-----------|------------------|-----------------------------------------------------------------|---------|-----------|-----------|
| Cpd 1: C <sub>19</sub> H <sub>18</sub> N <sub>6</sub> O <sub>3</sub> S; 1.315 | 98.62     | 1.32             | C <sub>19</sub> H <sub>18</sub> N <sub>6</sub> O <sub>3</sub> S | 1.315   | 410.1161  | 410.1167  |

| Obs. m/z | Obs. RT | Obs. Mass | Tgt Formula                                                     | Tgt Mass | Tgt Mass Error (ppm) | Find Cpd's Algorithm |
|----------|---------|-----------|-----------------------------------------------------------------|----------|----------------------|----------------------|
| 433.1046 | 1.315   | 410.1167  | C <sub>19</sub> H <sub>18</sub> N <sub>6</sub> O <sub>3</sub> S | 410.1161 | 1.32                 | Find by Formula      |

Compound Chromatograms

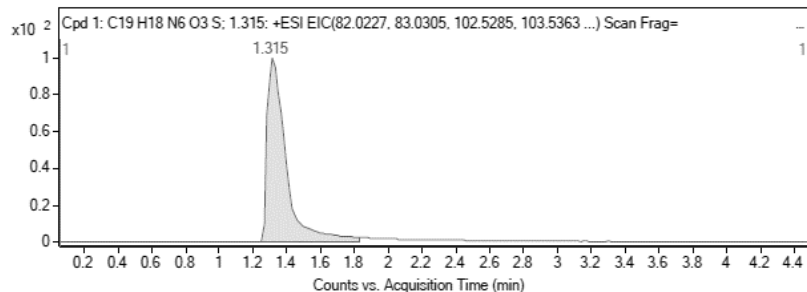

MS Zoomed Spectrum

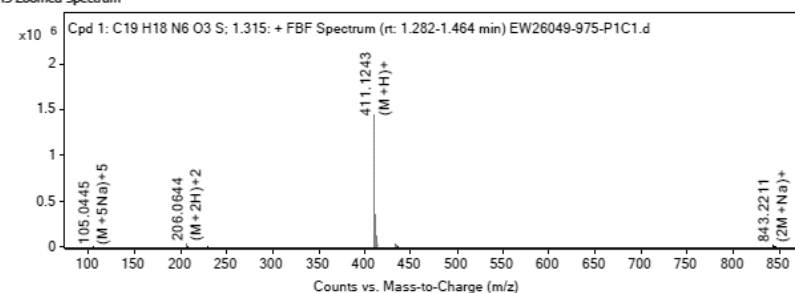

MS Spectrum Peak List

| Obs. m/z | Charge | Abund   | Ion/Isotope |
|----------|--------|---------|-------------|
| 206.0644 | 2      | 34937   | (M+2H)+2    |
| 206.5657 | 2      | 8542.68 | (M+2H)+2    |

|          |   |            |          |
|----------|---|------------|----------|
| 411.1243 | 1 | 1438607.63 | (M+H)+   |
| 412.1261 | 1 | 356487.84  | (M+H)+   |
| 413.1232 | 1 | 108992.29  | (M+H)+   |
| 433.1046 | 1 | 34449.09   | (M+Na)+  |
| 434.1074 | 1 | 8316.24    | (M+Na)+  |
| 843.2211 | 1 | 18047.82   | (2M+Na)+ |
| 844.2238 | 1 | 8722.7     | (2M+Na)+ |
| 845.2147 | 1 | 5844.32    | (2M+Na)+ |

MS Zoomed Spectrum

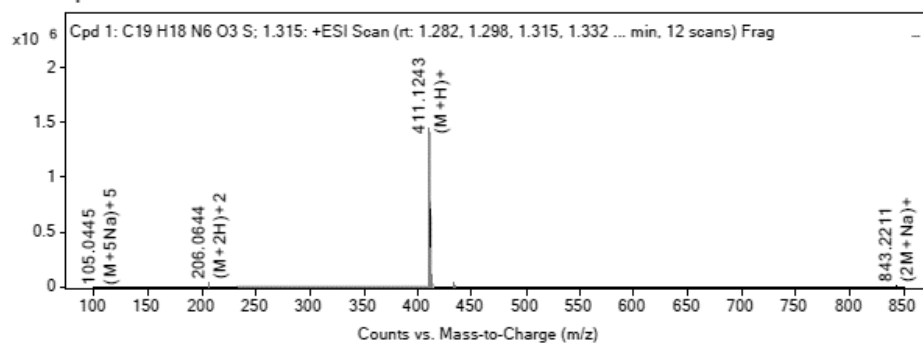

MS Spectrum Peak List

| Obs. m/z | Charge | Abund      | Ion/Isotope | Tgt Mass Error (ppm) |
|----------|--------|------------|-------------|----------------------|
| 206.0644 | 2      | 34937      | (M+2H)+2    | 4.35                 |
| 206.5657 | 2      | 8542.68    | (M+2H)+2    | 4.79                 |
| 411.1243 | 1      | 1438607.63 | (M+H)+      | -2.11                |
| 412.1261 | 1      | 356487.84  | (M+H)+      | -0.17                |
| 413.1232 | 1      | 108992.29  | (M+H)+      | -0.01                |
| 433.1046 | 1      | 34449.09   | (M+Na)+     | 1.59                 |
| 434.1074 | 1      | 8316.24    | (M+Na)+     | 1.33                 |
| 843.2211 | 1      | 18047.82   | (2M+Na)+    | 0.36                 |
| 844.2238 | 1      | 8722.7     | (2M+Na)+    | 0.35                 |
| 845.2147 | 1      | 5844.32    | (2M+Na)+    | 9.43                 |

— End Of Report —

<sup>1</sup>H NMR (2R,3R,4S,5S)-2-(6-Aminopurin-9-yl)-5-(thiazol-2-ylsulfanylmethyl) tetrahydrofuran-3,4-diol (**11**)

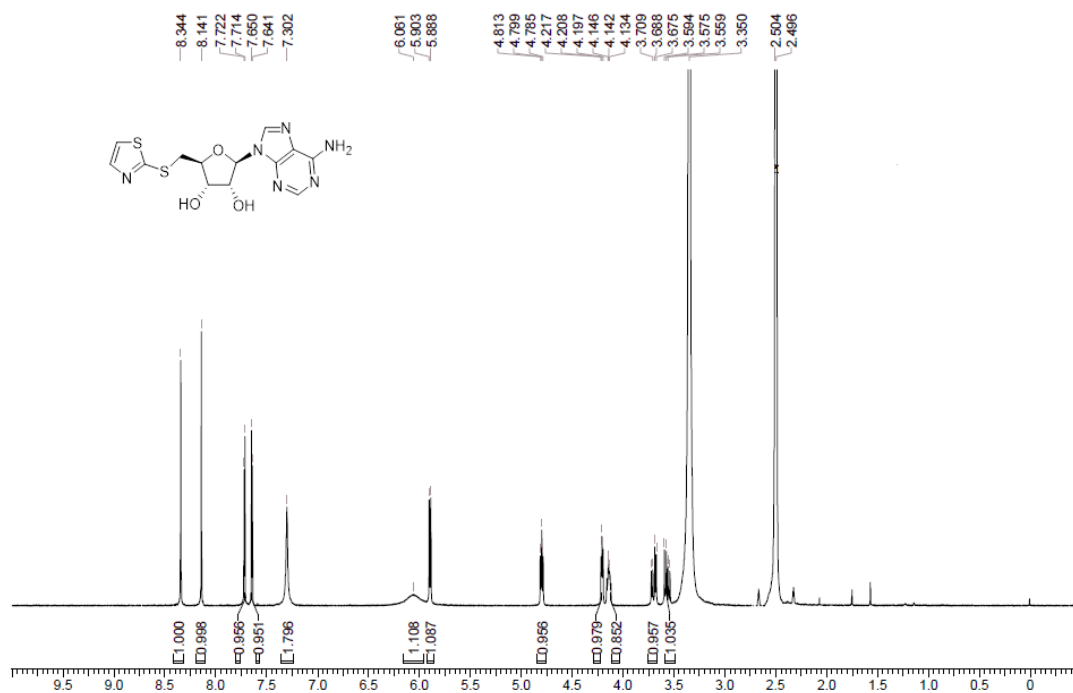

**<sup>13</sup>C NMR** (2R,3R,4S,5S)-2-(6-Aminopurin-9-yl)-5-(thiazol-2-ylsulfanylmethyl) tetrahydrofuran-3,4-diol (**11**)

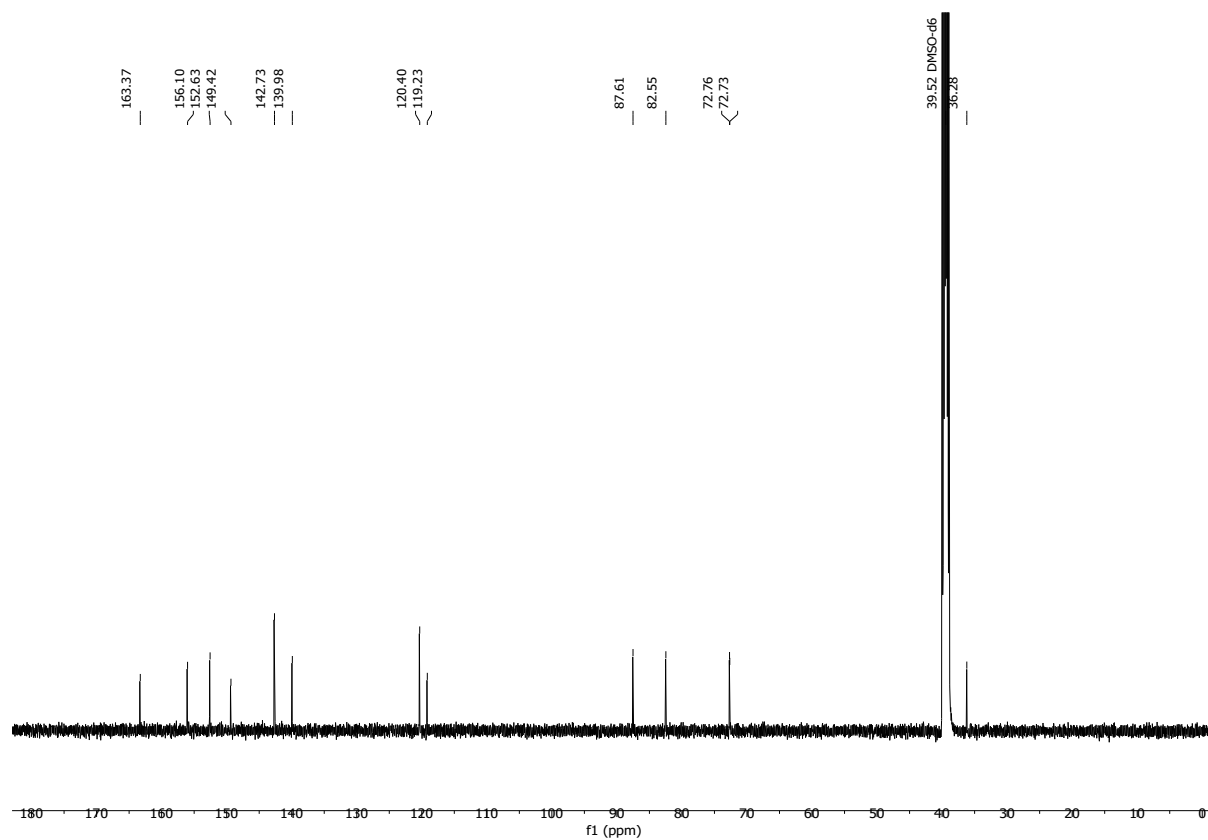

**HPLC** (2R,3R,4S,5S)-2-(6-Aminopurin-9-yl)-5-(thiazol-2-ylsulfanylmethyl) tetrahydrofuran-3,4-diol (**11**)



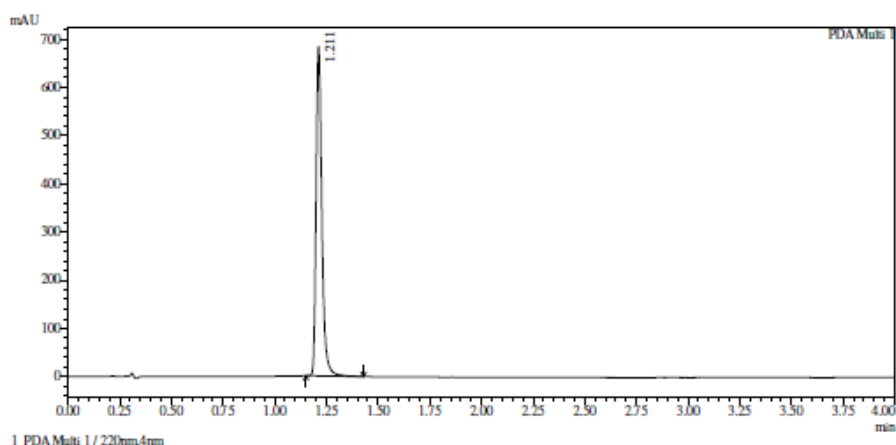

#### Integration result

| PeakTable     |           |           |            |        |         |         |
|---------------|-----------|-----------|------------|--------|---------|---------|
| PDA Ch1 220nm |           |           |            |        |         |         |
| Peak#         | Ret. Time | USP Width | Resolution | Height | Area    | Area %  |
| 1             | 1.211     | 0.050     | 0.000      | 683586 | 1329817 | 100.000 |
| Total         |           |           |            | 683586 | 1329817 | 100.000 |

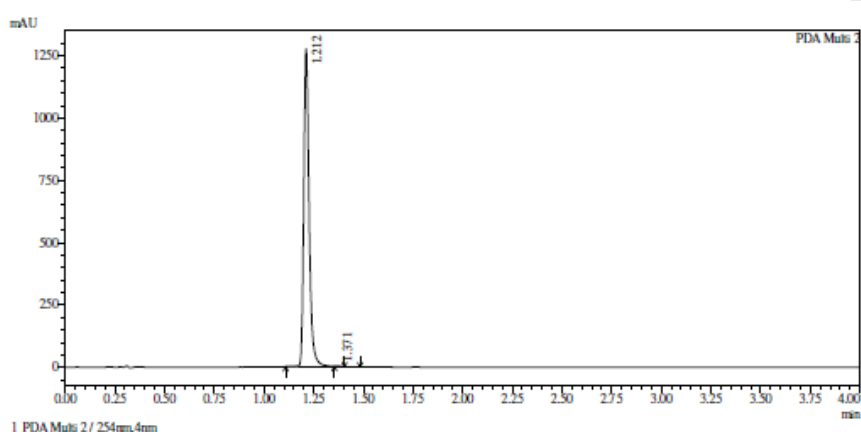

#### Integration result

| PeakTable     |           |           |            |         |         |         |
|---------------|-----------|-----------|------------|---------|---------|---------|
| PDA Ch2 254nm |           |           |            |         |         |         |
| Peak#         | Ret. Time | USP Width | Resolution | Height  | Area    | Area %  |
| 1             | 1.212     | 0.049     | 0.000      | 1275983 | 2410010 | 99.930  |
| 2             | 1.371     | 0.040     | 3.611      | 1169    | 1685    | 0.070   |
| Total         |           |           |            | 1277152 | 2411695 | 100.000 |

**HRMS** (2*R*,3*R*,4*S*,5*S*)-2-(6-Aminopurin-9-yl)-5-(thiazol-2-ylsulfanylmethyl) tetrahydrofuran-3,4-diol (**11**)

Compound Table

| Label                          | Tgt Score | Mass Error (ppm) | Tgt Formula      | Obs. RT | Ref. Mass | Obs. Mass |
|--------------------------------|-----------|------------------|------------------|---------|-----------|-----------|
| Cpd 1: C13 H14 N6 O3 S2: 1.425 | 99.58     | 3.92             | C13 H14 N6 O3 S2 | 1.425   | 366.0569  | 366.0583  |

| Obs. m/z | Obs. RT | Obs. Mass | Tgt Formula      | Tgt Mass | Tgt Mass Error (ppm) | Find Cpd's Algorithm |
|----------|---------|-----------|------------------|----------|----------------------|----------------------|
| 389.0464 | 1.425   | 366.0583  | C13 H14 N6 O3 S2 | 366.0569 | 3.92                 | Find by Formula      |

Compound Chromatograms

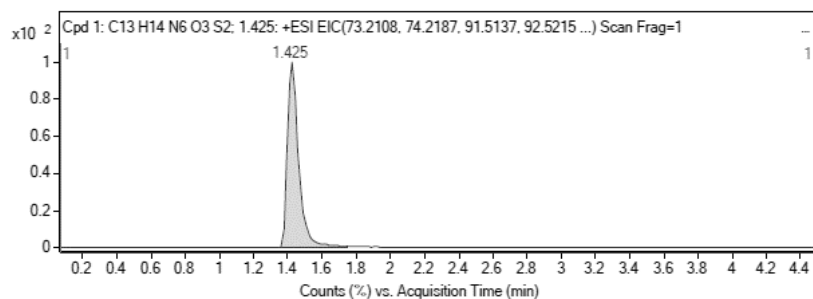

MS Zoomed Spectrum

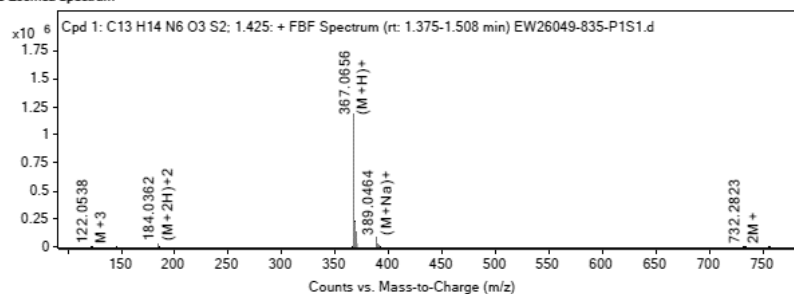

MS Spectrum Peak List

| Obs. m/z | Charge | Abund    | Ion/Isotope |
|----------|--------|----------|-------------|
| 184.0362 | 2      | 21635.29 | (M+2H)+2    |
| 184.5373 | 2      | 4148.75  | (M+2H)+2    |

|          |   |           |          |
|----------|---|-----------|----------|
| 185.0347 | 2 | 2450.13   | (M+2H)+2 |
| 367.0656 | 1 | 1184609   | (M+H)+   |
| 368.0671 | 1 | 219750.53 | (M+H)+   |
| 369.0624 | 1 | 127705.57 | (M+H)+   |
| 389.0464 | 1 | 82741.53  | (M+Na)+  |
| 390.0464 | 1 | 15333.03  | (M+Na)+  |
| 391.0439 | 1 | 8879.48   | (M+Na)+  |
| 392.0455 | 1 | 1312.33   | (M+Na)+  |

MS Zoomed Spectrum

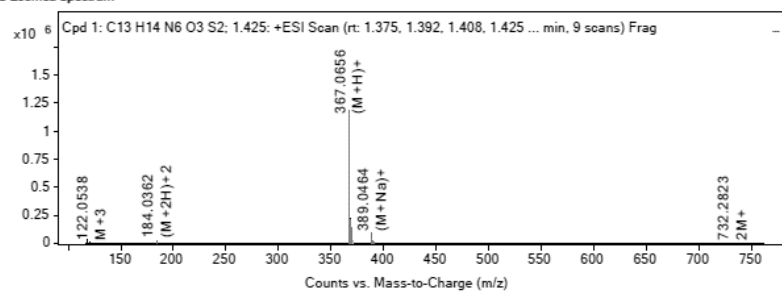

MS Spectrum Peak List

| Obs. m/z | Charge | Abund     | Ion/Isotope | Tgt Mass Error (ppm) |
|----------|--------|-----------|-------------|----------------------|
| 184.0362 | 2      | 21635.29  | (M+2H)+2    | -2.65                |
| 184.5373 | 2      | 4148.75   | (M+2H)+2    | -2.41                |
| 185.0347 | 2      | 2450.13   | (M+2H)+2    | -1.07                |
| 367.0656 | 1      | 1184609   | (M+H)+      | -3.99                |
| 368.0671 | 1      | 219750.53 | (M+H)+      | -1.98                |
| 369.0624 | 1      | 127705.57 | (M+H)+      | -1.99                |
| 389.0464 | 1      | 82741.53  | (M+Na)+     | -0.72                |
| 390.0464 | 1      | 15333.03  | (M+Na)+     | -0.02                |
| 391.0439 | 1      | 8879.48   | (M+Na)+     | -0.86                |
| 392.0455 | 1      | 1312.33   | (M+Na)+     | -0.66                |

--- End Of Report ---

<sup>1</sup>H NMR (2R,3R,4S,5S)-2-(6-Aminopurin-9-yl)-5-(imidazo[1,5-a]pyridin-8-ylsulfanylmethyl) tetrahydrofuran-3,4-

diol (**12**)

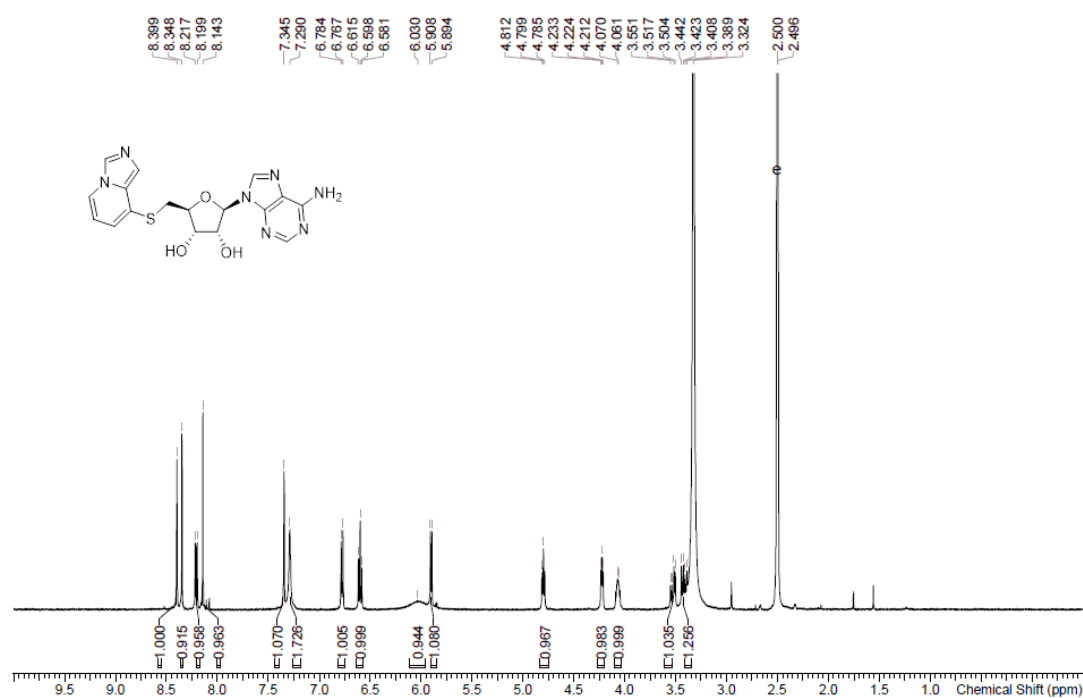

<sup>13</sup>C NMR (2*R*,3*R*,4*S*,5*S*)-2-(6-Aminopurin-9-yl)-5-(imidazo[1,5-*a*]pyridin-8-ylsulfanylmethyl) tetrahydrofuran-3,4-diol (**12**)

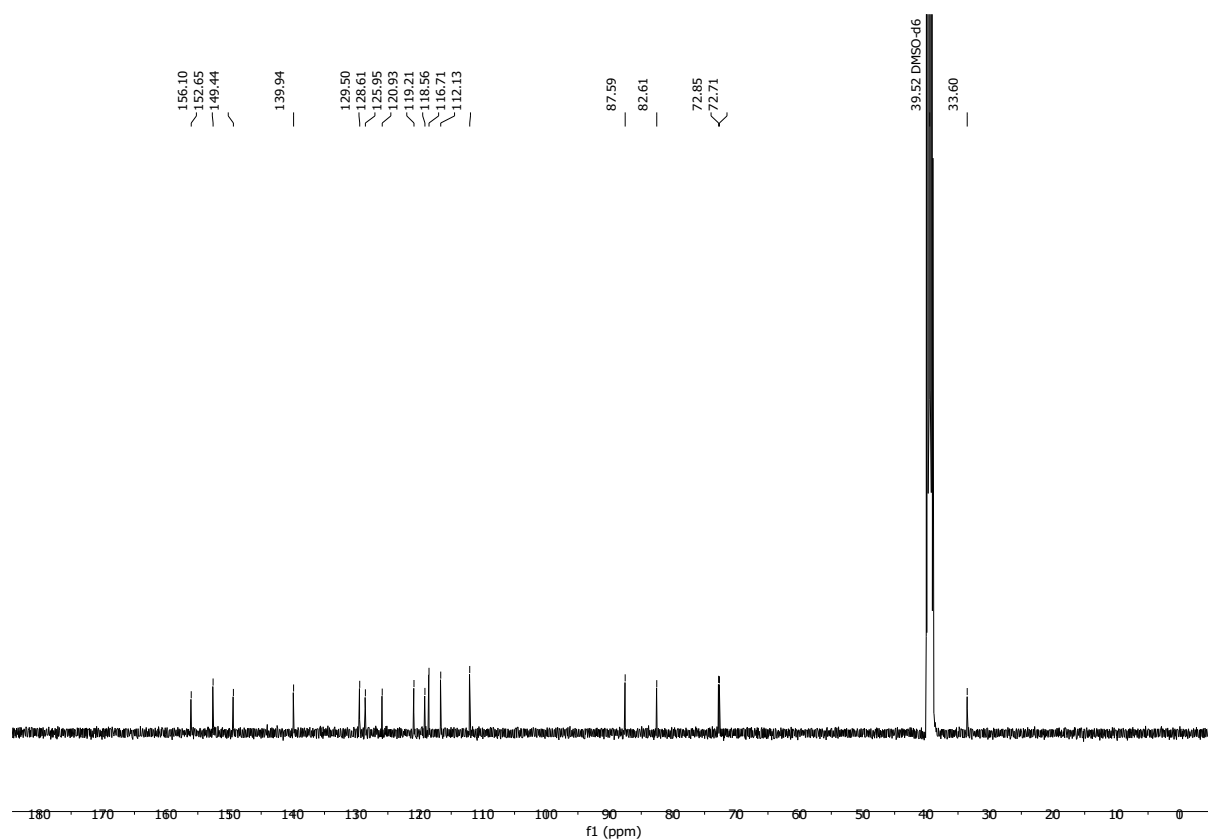

HPLC (2*R*,3*R*,4*S*,5*S*)-2-(6-Aminopurin-9-yl)-5-(imidazo[1,5-*a*]pyridin-8-ylsulfanylmethyl) tetrahydrofuran-3,4-diol

(12)

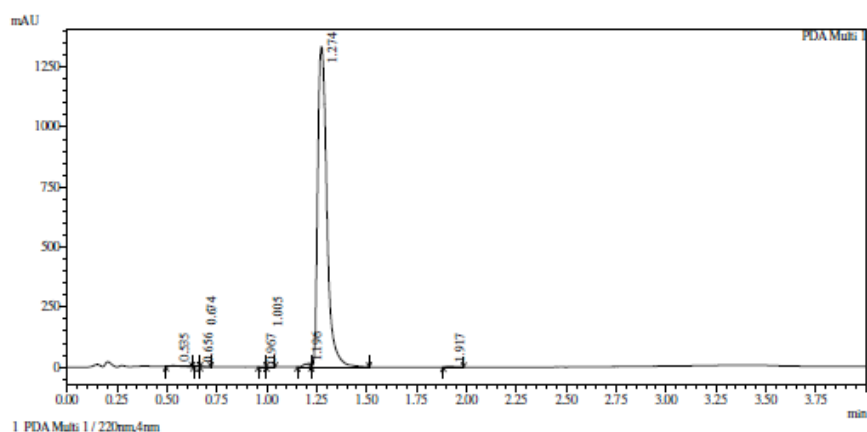

Integration result

| PeakTable     |           |           |            |         |         |         |
|---------------|-----------|-----------|------------|---------|---------|---------|
| PDA Ch1 220nm |           |           |            |         |         |         |
| Peak#         | Ret. Time | USP Width | Resolution | Height  | Area    | Area %  |
| 1             | 0.535     | 0.109     | 0.000      | 4051    | 14907   | 0.346   |
| 2             | 0.656     | 0.044     | 1.582      | 1156    | 1387    | 0.032   |
| 3             | 0.674     | 0.052     | 0.365      | 1362    | 2175    | 0.050   |
| 4             | 0.967     | 0.085     | 4.255      | 428     | 1002    | 0.023   |
| 5             | 1.005     | 0.048     | 0.569      | 571     | 1063    | 0.025   |
| 6             | 1.196     | 0.065     | 3.382      | 12166   | 26572   | 0.616   |
| 7             | 1.274     | 0.076     | 1.101      | 1333985 | 4254352 | 98.614  |
| 8             | 1.917     | 0.084     | 8.073      | 4127    | 12668   | 0.294   |
| Total         |           |           |            | 1357846 | 4314127 | 100.000 |

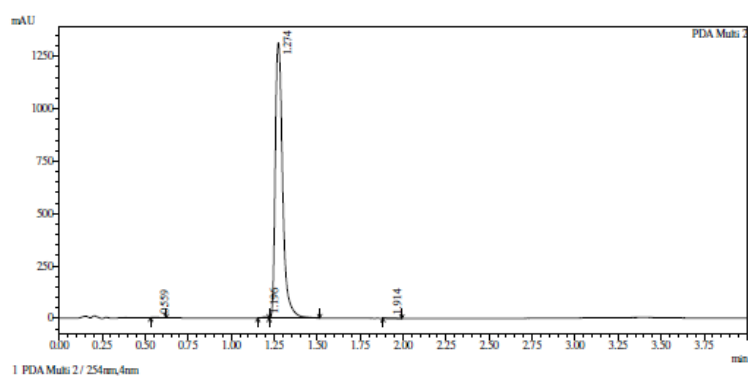

Integration result

| PeakTable     |           |           |            |         |         |         |
|---------------|-----------|-----------|------------|---------|---------|---------|
| PDA Ch2 254nm |           |           |            |         |         |         |
| Peak#         | Ret. Time | USP Width | Resolution | Height  | Area    | Area %  |
| 1             | 0.559     | 0.098     | 0.000      | 1360    | 4519    | 0.114   |
| 2             | 1.196     | 0.070     | 7.620      | 4743    | 10395   | 0.263   |
| 3             | 1.274     | 0.073     | 1.085      | 1314521 | 3939312 | 99.509  |
| 4             | 1.914     | 0.072     | 8.819      | 1563    | 4516    | 0.114   |
| Total         |           |           |            | 1322187 | 3958742 | 100.000 |

**HRMS** (2*R*,3*R*,4*S*,5*S*)-2-(6-Aminopurin-9-yl)-5-(imidazo[1,5-*a*]pyridin-8-ylsulfanylmethyl) tetrahydrofuran-3,4-diol (**12**)

Compound Table

| Label                         | Tgt Score | Mass Error (ppm) | Tgt Formula     | Obs. RT | Ref. Mass | Obs. Mass |
|-------------------------------|-----------|------------------|-----------------|---------|-----------|-----------|
| Cpd 1: C17 H17 N7 O3 S; 1.258 | 94.79     | 3.11             | C17 H17 N7 O3 S | 1.258   | 399.1114  | 399.1126  |

| Obs. m/z | Obs. RT | Obs. Mass | Tgt Formula     | Tgt Mass | Tgt Mass Error (ppm) | Find Cpts Algorithm |
|----------|---------|-----------|-----------------|----------|----------------------|---------------------|
| 400.1201 | 1.258   | 399.1126  | C17 H17 N7 O3 S | 399.1114 | 3.11                 | Find by Formula     |

Compound Chromatograms

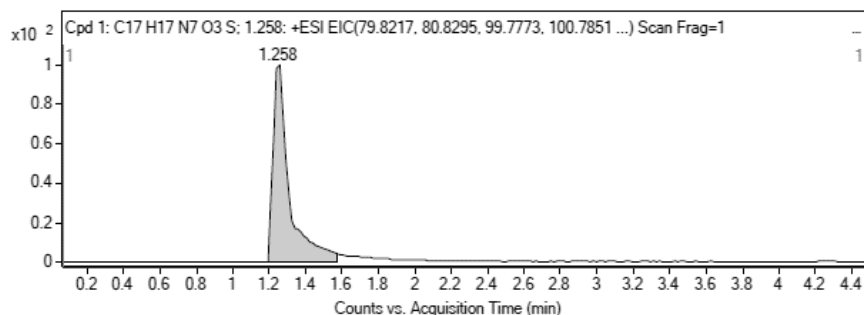

MS Zoomed Spectrum

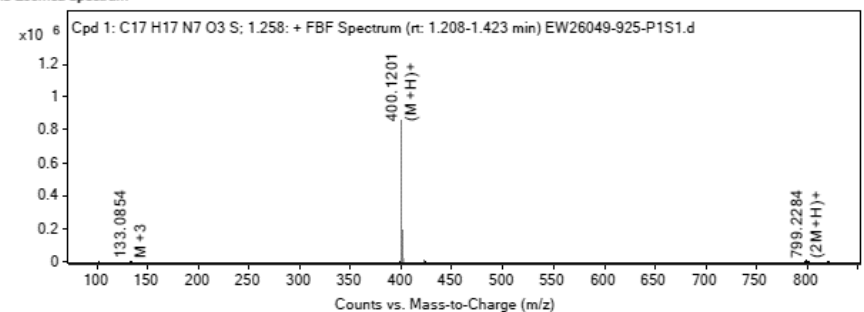

MS Spectrum Peak List

| Obs. m/z | Charge | Abund     | Ion/Isotope |
|----------|--------|-----------|-------------|
| 399.1109 | 1      | 3222.74   | M+          |
| 400.1201 | 1      | 858207.69 | (M+H)+      |

|          |   |           |          |
|----------|---|-----------|----------|
| 401.1218 | 1 | 189835.05 | (M+H)+   |
| 402.1186 | 1 | 59762.9   | (M+H)+   |
| 422.1006 | 1 | 3575.11   | (M+Na)+  |
| 799.2284 | 1 | 5936.94   | (2M+H)+  |
| 800.2299 | 1 | 2762.15   | (2M+H)+  |
| 801.2293 | 1 | 1206.66   | (2M+H)+  |
| 821.2113 | 1 | 3012.22   | (2M+Na)+ |
| 822.2126 | 1 | 1454.71   | (2M+Na)+ |

MS Zoomed Spectrum

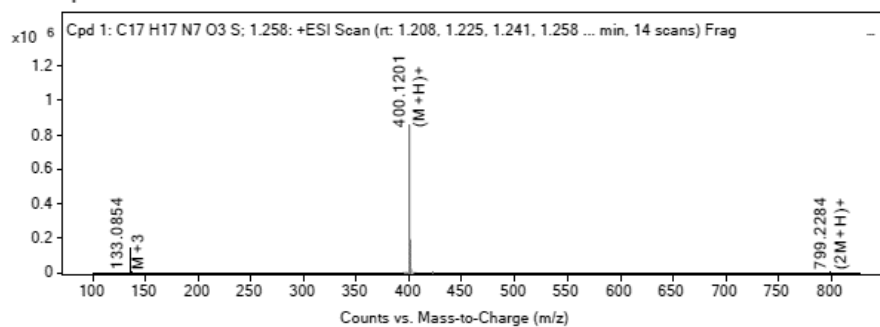

MS Spectrum Peak List

| Obs. m/z | Charge | Abund     | Ion/Isotope | Tgt Mass Error (ppm) |
|----------|--------|-----------|-------------|----------------------|
| 399.1109 | 1      | 3222.74   | M+          | -0.26                |
| 400.1201 | 1      | 858207.69 | (M+H)+      | -3.55                |
| 401.1218 | 1      | 189835.05 | (M+H)+      | -1.66                |
| 402.1186 | 1      | 59762.9   | (M+H)+      | -1.45                |
| 422.1006 | 1      | 3575.11   | (M+Na)+     | 0.02                 |
| 799.2284 | 1      | 5936.94   | (2M+H)+     | 2.01                 |
| 800.2299 | 1      | 2762.15   | (2M+H)+     | 3.28                 |
| 801.2293 | 1      | 1206.66   | (2M+H)+     | 1.77                 |
| 821.2113 | 1      | 3012.22   | (2M+Na)+    | 0.8                  |
| 822.2126 | 1      | 1454.71   | (2M+Na)+    | 2.23                 |

— End Of Report —

<sup>1</sup>H NMR (2R,3R,4S,5S)-2-(6-Amino-9H-purin-9-yl)-5-(((1-methyl-1H-benzo[d]imidazol-2-yl)thio)methyl)tetrahydrofuran-3,4-diol (**13**)

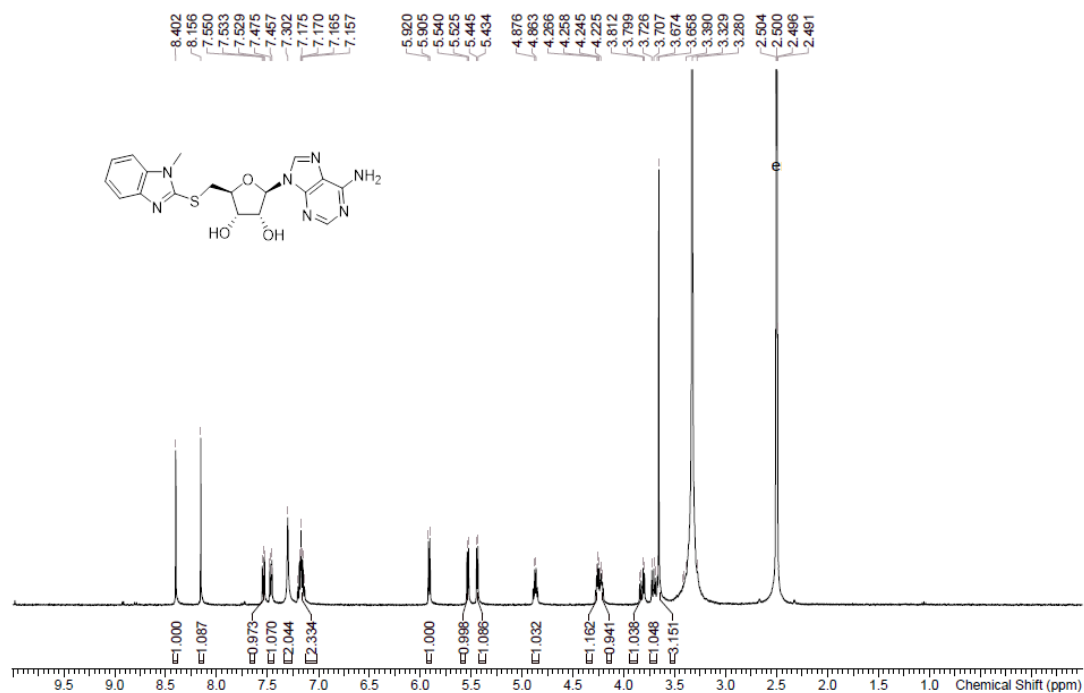

**HPLC (2R,3R,4S,5S)-2-(6-Amino-9H-purin-9-yl)-5-(((1-methyl-1H-benzo[d]imidazol-2-yl)thio)methyl)tetrahydrofuran-3,4-diol (**13**)**

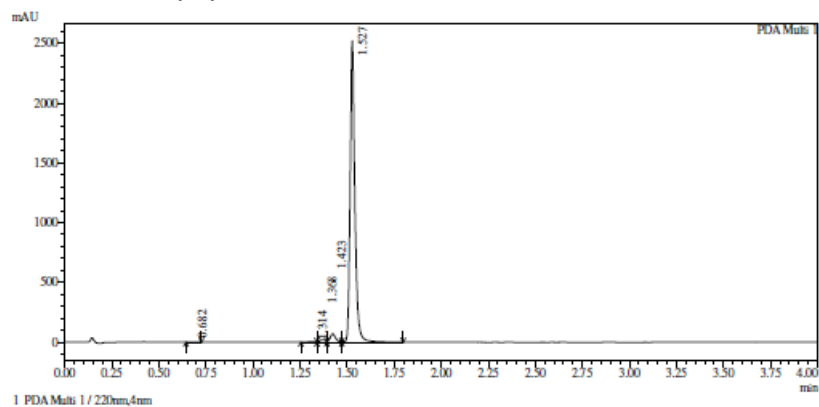

Integration result

| PDA Ch1 220nm |           | PeakTable |            |         |         |         |
|---------------|-----------|-----------|------------|---------|---------|---------|
| Peak#         | Ret. Time | USP Width | Resolution | Height  | Area    | Area %  |
| 1             | 0.682     | 0.067     | 0.000      | 939     | 2273    | 0.050   |
| 2             | 1.314     | 0.078     | 8.709      | 4803    | 12506   | 0.275   |
| 3             | 1.368     | 0.071     | 0.718      | 19126   | 40212   | 0.886   |
| 4             | 1.423     | 0.051     | 0.896      | 70026   | 141471  | 3.115   |
| 5             | 1.527     | 0.045     | 2.160      | 2521338 | 4344684 | 95.674  |
| Total         |           |           |            | 2616232 | 4541146 | 100.000 |

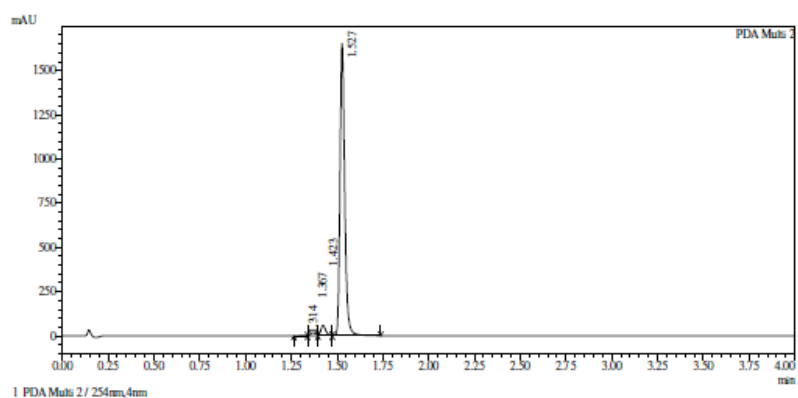

| Integration result |           |          |            |         |         |         |
|--------------------|-----------|----------|------------|---------|---------|---------|
| PeakTable          |           |          |            |         |         |         |
| Peak#              | Ret. Time | USPWidth | Resolution | Height  | Area    | Area %  |
| 1                  | 1.314     | 0.076    | 0.000      | 3112    | 7581    | 0.244   |
| 2                  | 1.367     | 0.062    | 0.775      | 18220   | 37337   | 1.200   |
| 3                  | 1.423     | 0.051    | 0.978      | 58517   | 116609  | 3.747   |
| 4                  | 1.527     | 0.047    | 2.118      | 1650937 | 2950694 | 94.810  |
| Total              |           |          |            | 1730786 | 3112221 | 100.000 |

**HRMC** (2R,3R,4S,5S)-2-(6-Amino-9H-purin-9-yl)-5-(((1-methyl-1H-benzo[d]imidazol-2-yl)thio)methyl)tetrahydrofuran-3,4-diol (**13**)

Compound Table

| Label                         | Tgt Score | Mass Error (ppm) | Tgt Formula     | Obs. RT | Ref. Mass | Obs. Mass |
|-------------------------------|-----------|------------------|-----------------|---------|-----------|-----------|
| Cpd 1: C18 H19 N7 O3 S; 1.233 | 99.59     | 2.51             | C18 H19 N7 O3 S | 1.233   | 413.127   | 413.128   |

| Obs. m/z | Obs. RT | Obs. Mass | Tgt Formula     | Tgt Mass | Tgt Mass Error (ppm) | Find Cpd's Algorithm |
|----------|---------|-----------|-----------------|----------|----------------------|----------------------|
| 207.5707 | 1.233   | 413.128   | C18 H19 N7 O3 S | 413.127  | 2.51                 | Find by Formula      |

Compound Chromatograms

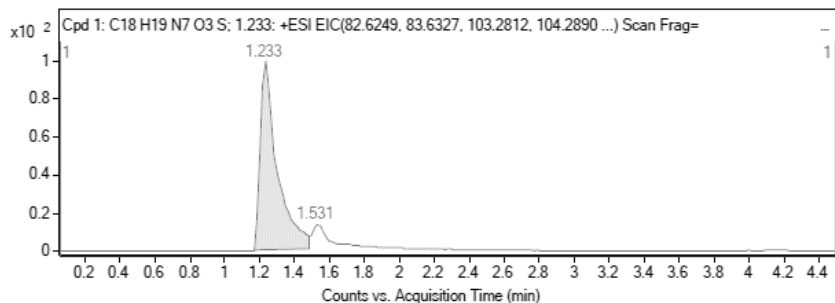

MS Zoomed Spectrum

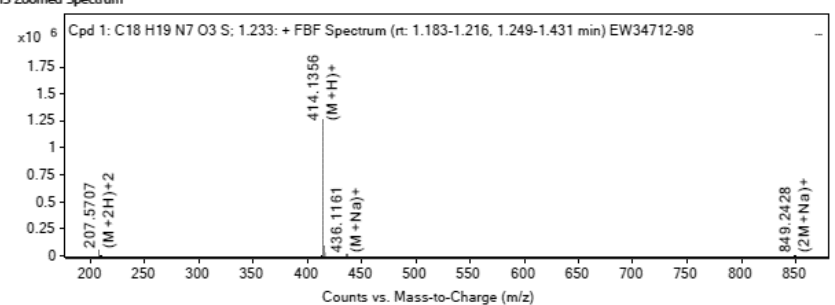

MS Spectrum Peak List

| Obs. m/z | Charge | Abund    | Ion/Isotope |
|----------|--------|----------|-------------|
| 207.5707 | 2      | 47508.82 | (M+2H)+2    |
| 208.0721 | 2      | 11656.19 | (M+2H)+2    |

|          |   |            |          |
|----------|---|------------|----------|
| 208.5706 | 2 | 3979.88    | (M+2H)+2 |
| 413.1211 | 1 | 776.37     | M+       |
| 414.1356 | 1 | 1260667.75 | (M+H)+   |
| 415.1374 | 1 | 296669.78  | (M+H)+   |
| 416.1342 | 1 | 92065.24   | (M+H)+   |
| 436.1161 | 1 | 7755.8     | (M+Na)+  |
| 437.119  | 1 | 1760.48    | (M+Na)+  |
| 849.2428 | 1 | 1189.16    | (2M+Na)+ |

MS Zoomed Spectrum

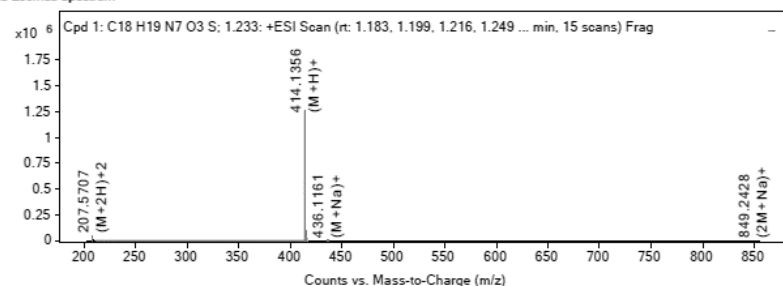

MS Spectrum Peak List

| Obs. m/z | Charge | Abund      | Ion/Isotope | Tgt Mass Error (ppm) |
|----------|--------|------------|-------------|----------------------|
| 207.5707 | 2      | 47508.82   | (M+2H)+2    | -0.23                |
| 208.0721 | 2      | 11656.19   | (M+2H)+2    | -0.21                |
| 208.5706 | 2      | 3979.88    | (M+2H)+2    | -0.14                |
| 413.1211 | 1      | 776.37     | M+          | 12.98                |
| 414.1356 | 1      | 1260667.75 | (M+H)+      | -3.07                |
| 415.1374 | 1      | 296669.78  | (M+H)+      | -1.33                |
| 416.1342 | 1      | 92065.24   | (M+H)+      | -0.76                |
| 436.1161 | 1      | 7755.8     | (M+Na)+     | 0.32                 |
| 437.119  | 1      | 1760.48    | (M+Na)+     | -0.41                |
| 849.2428 | 1      | 1189.16    | (2M+Na)+    | 0.54                 |

--- End Of Report ---

<sup>1</sup>H NMR (2R,3R,4S,5S)-2-(6-Amino-9H-purin-9-yl)-5-((benzo[d]oxazol-2-ylthio)methyl) tetrahydrofuran-3,4-diol (14)



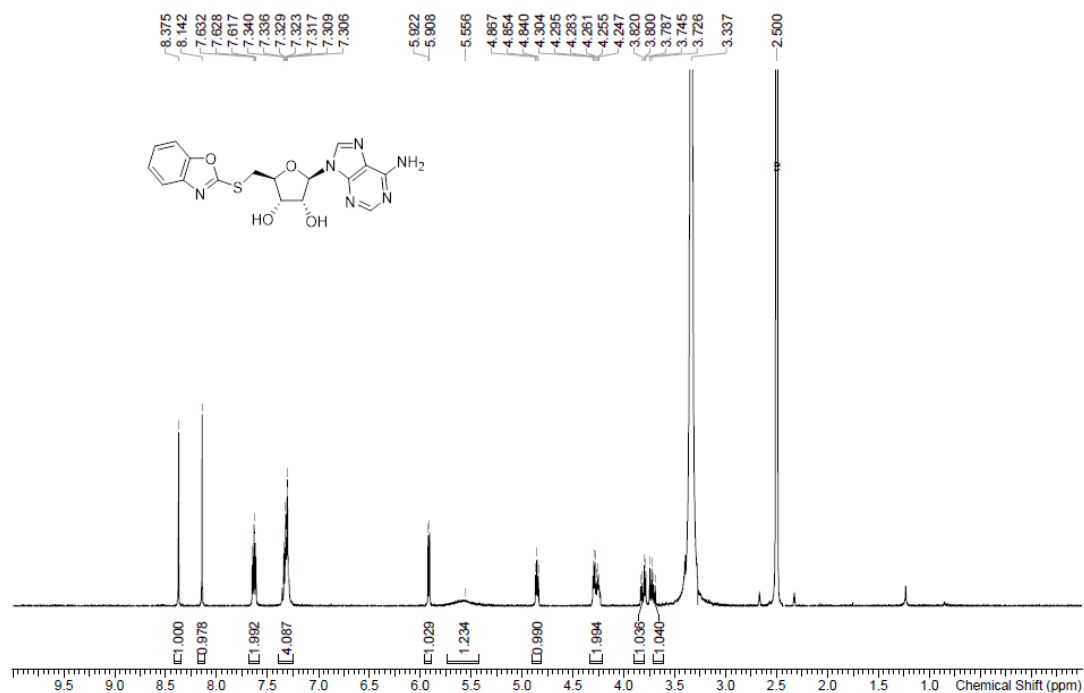

**<sup>13</sup>C NMR** (2R,3R,4S,5S)-2-(6-Amino-9H-purin-9-yl)-5-((benzo[d]oxazol-2-ylthio)methyl) tetrahydrofuran-3,4-diol (14)

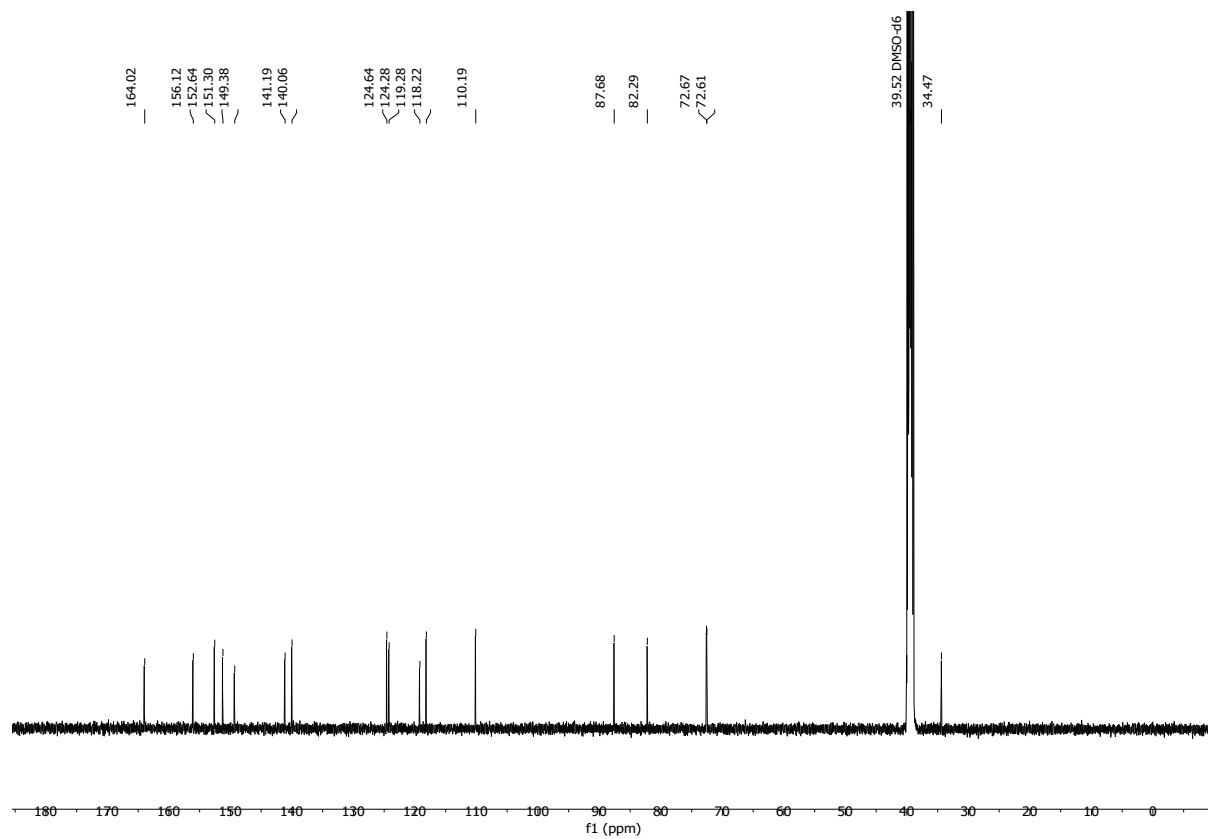

**HPLC** (2R,3R,4S,5S)-2-(6-Amino-9H-purin-9-yl)-5-((benzo[d]oxazol-2-ylthio)methyl) tetrahydrofuran-3,4-diol (14)

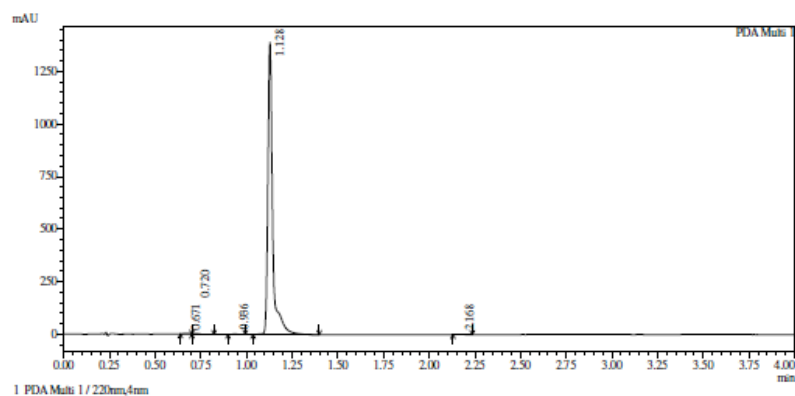

Integration result

| PeakTable |           |           |            |         |         |         |
|-----------|-----------|-----------|------------|---------|---------|---------|
| Peak#     | Ret. Time | USP Width | Resolution | Height  | Area    | Area %  |
| 1         | 0.671     | 0.000     | 0.000      | 1265    | 3992    | 0.155   |
| 2         | 0.720     | 0.067     | 0.000      | 3067    | 6431    | 0.250   |
| 3         | 0.936     | 0.054     | 3.568      | 2280    | 4941    | 0.192   |
| 4         | 1.128     | 0.043     | 3.958      | 1390751 | 2548165 | 99.230  |
| 5         | 2.168     | 0.067     | 19.003     | 1747    | 4407    | 0.172   |
| Total     |           |           |            | 1399110 | 2567936 | 100.000 |

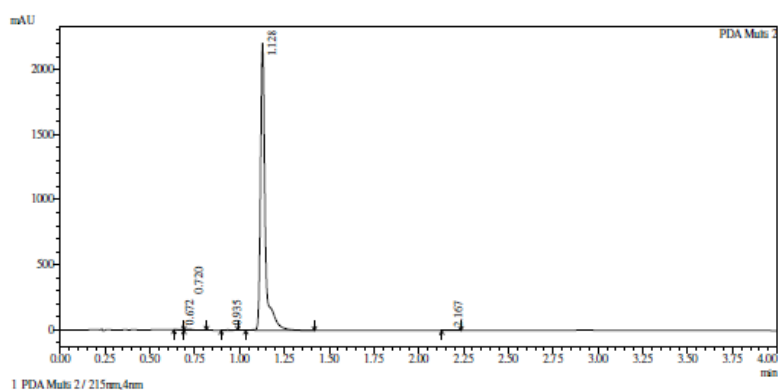

Integration result

| PeakTable |           |           |            |         |         |         |
|-----------|-----------|-----------|------------|---------|---------|---------|
| Peak#     | Ret. Time | USP Width | Resolution | Height  | Area    | Area %  |
| 1         | 0.672     | 0.000     | 0.000      | 2448    | 5476    | 0.134   |
| 2         | 0.720     | 0.112     | 0.000      | 5950    | 14812   | 0.362   |
| 3         | 0.935     | 0.052     | 2.631      | 3477    | 6898    | 0.169   |
| 4         | 1.128     | 0.043     | 4.079      | 2202921 | 4060572 | 99.237  |
| 5         | 2.167     | 0.067     | 18.840     | 1561    | 4054    | 0.099   |
| Total     |           |           |            | 2216357 | 4091810 | 100.000 |

**HRMS** (2R,3R,4S,5S)-2-(6-Amino-9H-purin-9-yl)-5-((benzo[d]oxazol-2-ylthio)methyl) tetrahydrofuran-3,4-diol  
(14)

Compound Table

| Label                         | Tgt Score | Mass Error (ppm) | Tgt Formula     | Obs. RT | Ref. Mass | Obs. Mass |
|-------------------------------|-----------|------------------|-----------------|---------|-----------|-----------|
| Cpd 1: C17 H16 N6 O4 S; 1.644 | 98.19     | 3.31             | C17 H16 N6 O4 S | 1.644   | 400.0954  | 400.0967  |

| Obs. m/z | Obs. RT | Obs. Mass | Tgt Formula     | Tgt Mass | Tgt Mass Error (ppm) | Find Cpd's Algorithm |
|----------|---------|-----------|-----------------|----------|----------------------|----------------------|
| 423.0844 | 1.644   | 400.0967  | C17 H16 N6 O4 S | 400.0954 | 3.31                 | Find by Formula      |

Compound Chromatograms

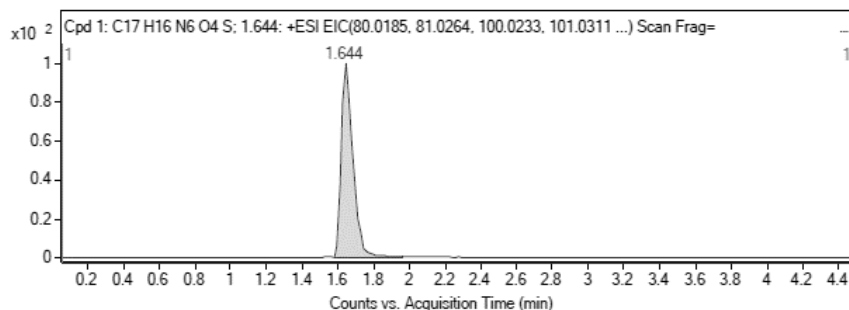

MS Zoomed Spectrum

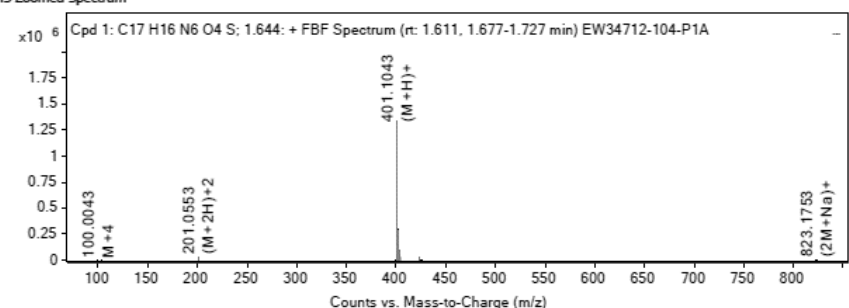

MS Spectrum Peak List

| Obs. m/z | Charge | Abund    | Ion/Isotope |
|----------|--------|----------|-------------|
| 201.0553 | 2      | 29501.22 | (M+2H)+2    |
| 201.5566 | 2      | 7101.29  | (M+2H)+2    |

|          |   |            |          |
|----------|---|------------|----------|
| 202.055  | 2 | 2179.13    | (M+2H)+2 |
| 401.1043 | 1 | 1335291.75 | (M+H)+   |
| 402.106  | 1 | 292246.5   | (M+H)+   |
| 403.1028 | 1 | 95815.08   | (M+H)+   |
| 423.0844 | 1 | 24024.24   | (M+Na)+  |
| 424.0863 | 1 | 5721.87    | (M+Na)+  |
| 425.0841 | 1 | 2038.85    | (M+Na)+  |
| 823.1753 | 1 | 392.42     | (2M+Na)+ |

MS Zoomed Spectrum

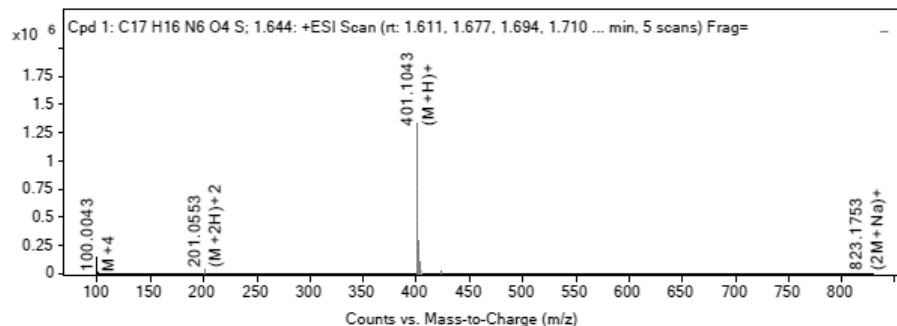

MS Spectrum Peak List

| Obs. m/z | Charge | Abund      | Ion/Isotope | Tgt Mass Error (ppm) |
|----------|--------|------------|-------------|----------------------|
| 201.0553 | 2      | 29501.22   | (M+2H)+2    | -1.44                |
| 201.5566 | 2      | 7101.29    | (M+2H)+2    | -1.69                |
| 202.055  | 2      | 2179.13    | (M+2H)+2    | -1.23                |
| 401.1043 | 1      | 1335291.75 | (M+H)+      | -4                   |
| 402.106  | 1      | 292246.5   | (M+H)+      | -1.96                |
| 403.1028 | 1      | 95815.08   | (M+H)+      | -1.54                |
| 423.0844 | 1      | 24024.24   | (M+Na)+     | 0.46                 |
| 424.0863 | 1      | 5721.87    | (M+Na)+     | 2.22                 |
| 425.0841 | 1      | 2038.85    | (M+Na)+     | 0.04                 |
| 823.1753 | 1      | 392.42     | (2M+Na)+    | 5.64                 |

--- End Of Report ---

<sup>1</sup>H NMR (2S,3S,4R,5R)-2-(((1H-Benzo[d]imidazol-2-yl)thio)methyl)-5-(6-amino-9H-purin-9-yl) tetrahydrofuran-3,4-diol (**15**)

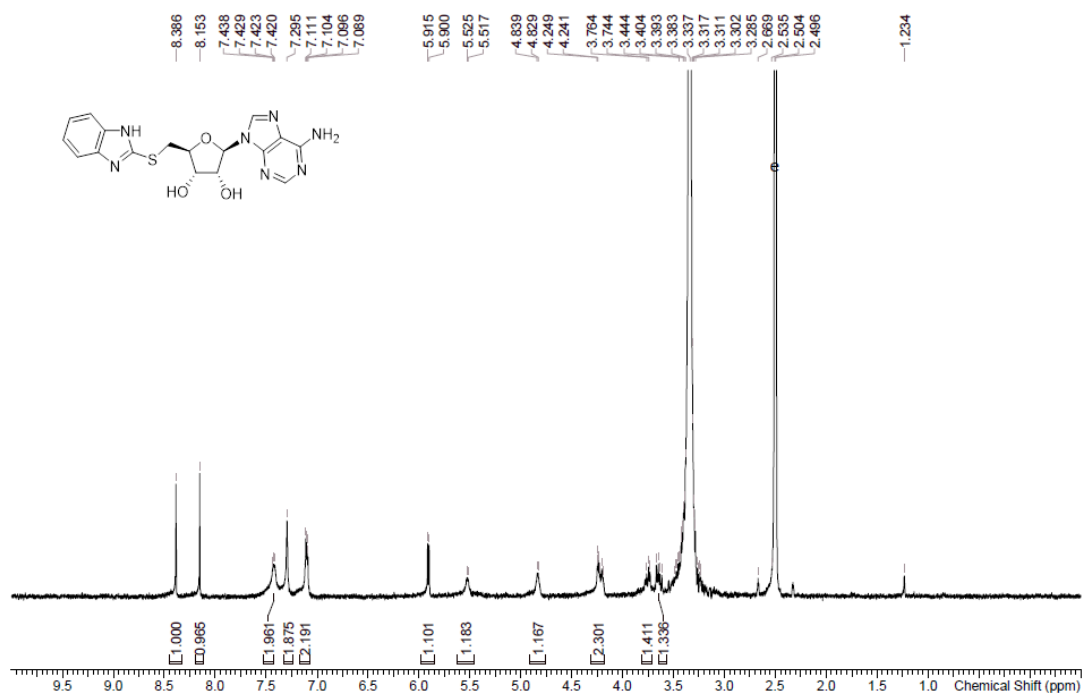

<sup>13</sup>C NMR (2S,3S,4R,5R)-2-(((1H-benzo[d]imidazol-2-yl)thio)methyl)-5-(6-amino-9H-purin-9-yl) tetrahydrofuran-3,4-diol (**15**)

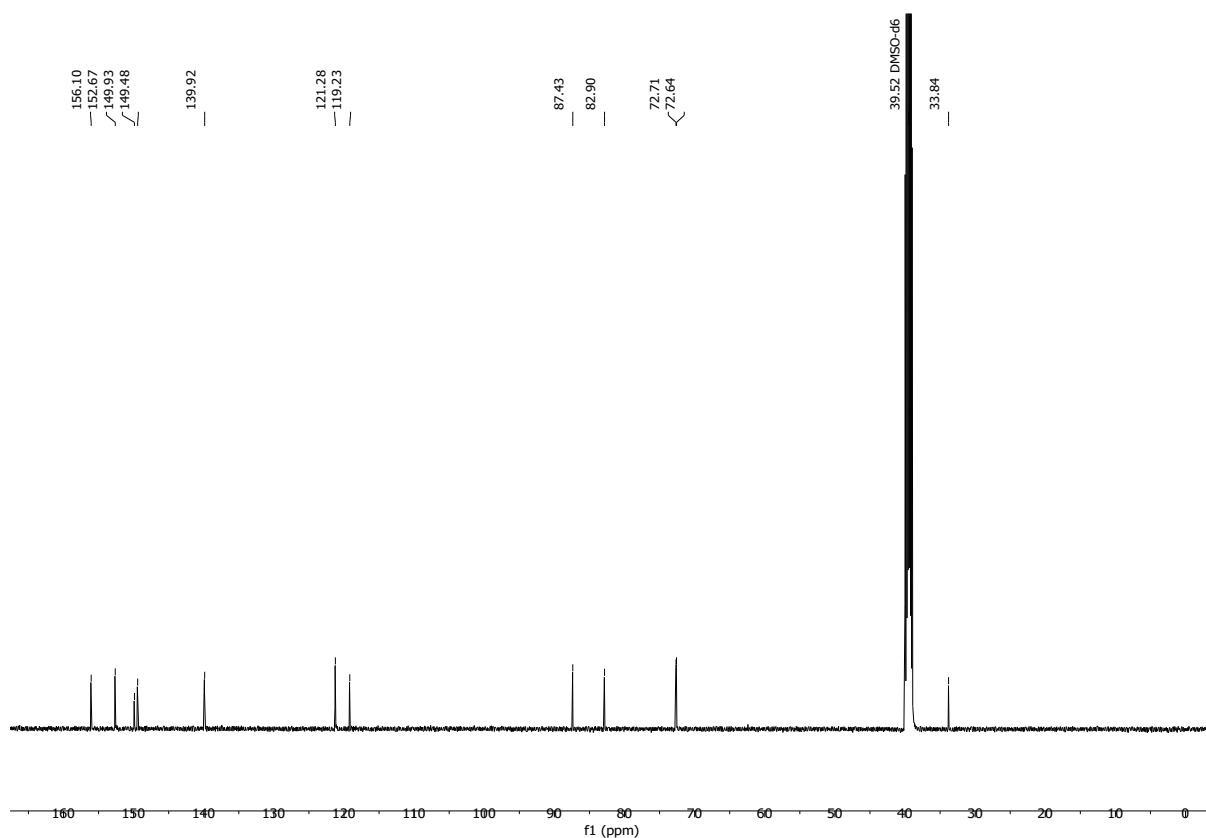

**HPLC** (2S,3S,4R,5R)-2-(((1H-Benzo[d]imidazol-2-yl)thio)methyl)-5-(6-amino-9H-purin-9-yl) tetrahydrofuran-3,4-diol (**15**)

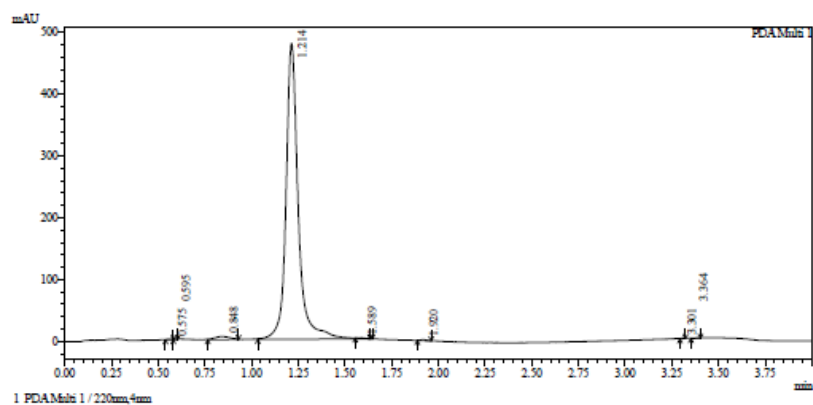

Integration result

| PeakTable |           |           |            |        |         |         |
|-----------|-----------|-----------|------------|--------|---------|---------|
| Peak#     | Ret. Time | USP Width | Resolution | Height | Area    | Area %  |
| 1         | 0.575     | 0.057     | 0.000      | 886    | 1572    | 0.071   |
| 2         | 0.595     | 0.064     | 0.332      | 951    | 1130    | 0.051   |
| 3         | 0.848     | 0.143     | 2.449      | 4925   | 27014   | 1.212   |
| 4         | 1.214     | 0.106     | 2.932      | 479310 | 2190445 | 98.284  |
| 5         | 1.589     | 0.047     | 4.891      | 1010   | 1949    | 0.087   |
| 6         | 1.920     | 0.054     | 6.520      | 1639   | 3246    | 0.146   |
| 7         | 3.301     | 0.087     | 19.565     | 890    | 1420    | 0.064   |
| 8         | 3.364     | 0.119     | 0.610      | 673    | 1915    | 0.086   |
| Total     |           |           |            | 490283 | 2228692 | 100.000 |

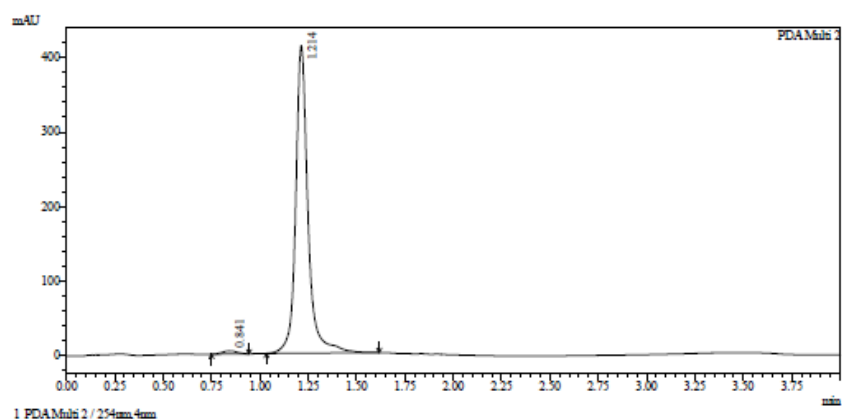

| Integration result |           |           |            |        |         |         |
|--------------------|-----------|-----------|------------|--------|---------|---------|
| PeakTable          |           |           |            |        |         |         |
| Peak#              | Ret. Time | USP Width | Resolution | Height | Area    | Area %  |
| 1                  | 0.841     | 0.151     | 0.000      | 4303   | 23862   | 1.292   |
| 2                  | 1.214     | 0.105     | 2.923      | 412225 | 1822897 | 98.708  |
| Total              |           |           |            | 416528 | 1846759 | 100.000 |

**HRMC** (2S,3S,4R,5R)-2-(((1H-Benzo[d]imidazol-2-yl)thio)methyl)-5-(6-amino-9H-purin-9-yl) tetrahydrofuran-3,4-diol (**15**)

Compound Table

| Label                         | Tgt Score | Mass Error (ppm) | Tgt Formula     | Obs. RT | Ref. Mass | Obs. Mass |
|-------------------------------|-----------|------------------|-----------------|---------|-----------|-----------|
| Cpd 1: C17 H17 N7 O3 S; 1.155 | 95.02     | 3.16             | C17 H17 N7 O3 S | 1.155   | 399.1114  | 399.1126  |

| Obs. <i>m/z</i> | Obs. RT | Obs. Mass | Tgt Formula     | Tgt Mass | Tgt Mass Error (ppm) | Find Cpd's Algorithm |
|-----------------|---------|-----------|-----------------|----------|----------------------|----------------------|
| 400.1201        | 1.155   | 399.1126  | C17 H17 N7 O3 S | 399.1114 | 3.16                 | Find by Formula      |

Compound Chromatograms

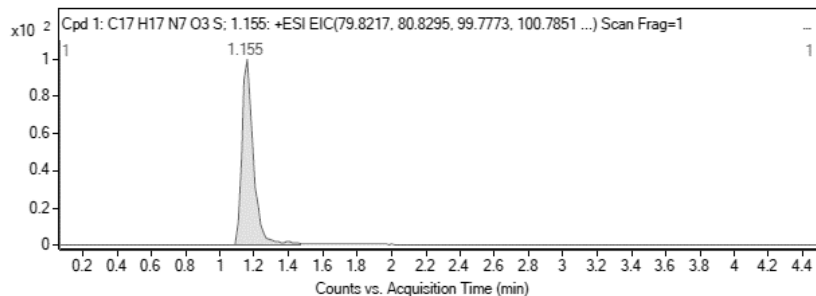

MS Zoomed Spectrum

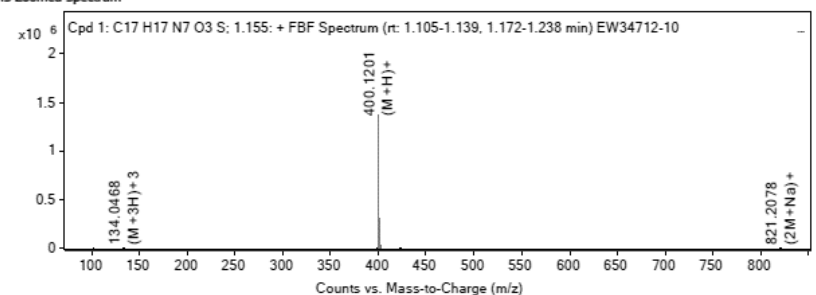

MS Spectrum Peak List

| Obs. <i>m/z</i> | Charge | Abund   | Ion/Isotope |
|-----------------|--------|---------|-------------|
| 133.073         | 3      | 289.63  | M+3         |
| 134.0468        | 3      | 4387.62 | (M+3H)+3    |

|          |   |           |          |
|----------|---|-----------|----------|
| 399.1109 | 1 | 298.95    | M+       |
| 400.1201 | 1 | 1368.297  | (M+H)+   |
| 401.1218 | 1 | 306489.69 | (M+H)+   |
| 402.1186 | 1 | 94816.95  | (M+H)+   |
| 403.119  | 1 | 15879.96  | (M+H)+   |
| 422.1008 | 1 | 3490.26   | (M+Na)+  |
| 423.1031 | 1 | 772.61    | (M+Na)+  |
| 821.2078 | 1 | 325.2     | (2M+Na)+ |

MS Zoomed Spectrum

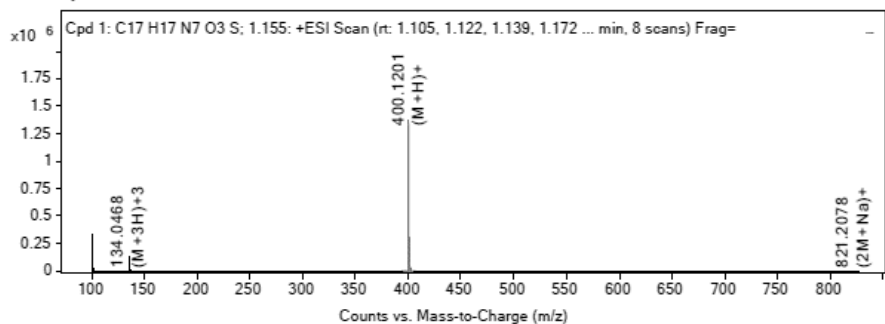

MS Spectrum Peak List

| Obs. <i>m/z</i> | Charge | Abund     | Ion/Isotope | Tgt Mass Error (ppm) |
|-----------------|--------|-----------|-------------|----------------------|
| 133.073         | 3      | 289.63    | M+3         | -274.01              |
| 134.0468        | 3      | 4387.62   | (M+3H)+3    | -17.76               |
| 399.1109        | 1      | 298.95    | M+          | -0.34                |
| 400.1201        | 1      | 1368.297  | (M+H)+      | -3.63                |
| 401.1218        | 1      | 306489.69 | (M+H)+      | -1.52                |
| 402.1186        | 1      | 94816.95  | (M+H)+      | -1.44                |
| 403.119         | 1      | 15879.96  | (M+H)+      | 0.23                 |
| 422.1008        | 1      | 3490.26   | (M+Na)+     | -0.5                 |
| 423.1031        | 1      | 772.61    | (M+Na)+     | -0.09                |
| 821.2078        | 1      | 325.2     | (2M+Na)+    | 5                    |

— End Of Report —

<sup>1</sup>H NMR (2S,3S,4R,5R)-2-(((1H-Indazol-7-yl)thio)methyl)-5-(6-amino-9H-purin-9-yl)tetrahydrofuran-3,4-diol (**16**)

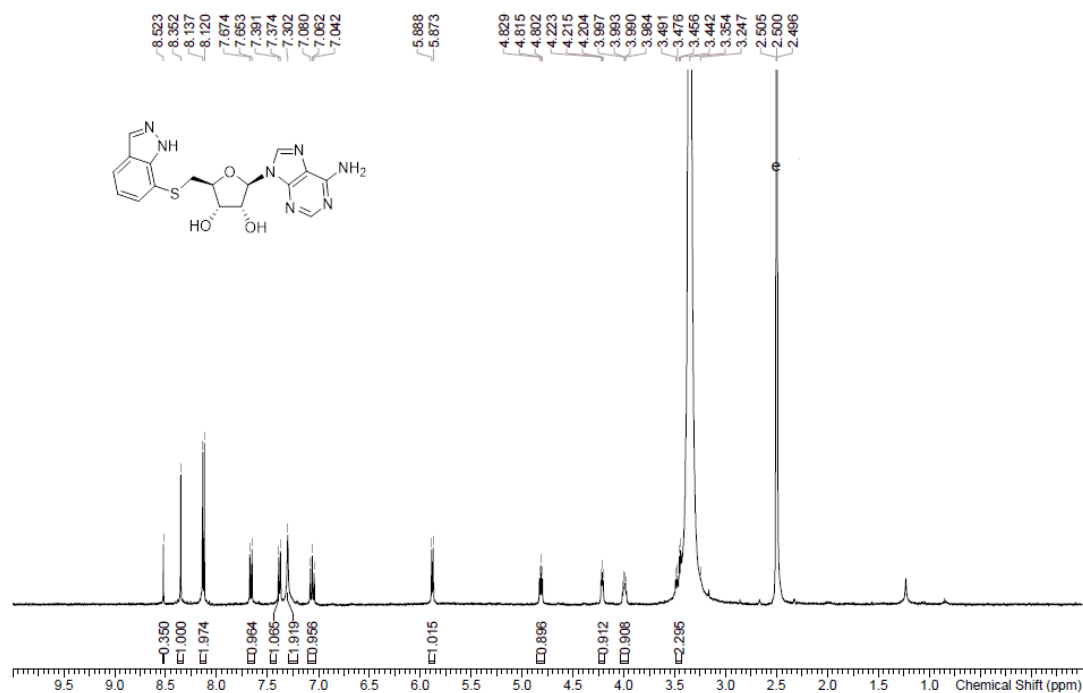

# HPLC (2S,3S,4R,5R)-2-(((1H-Indazol-7-yl)thio)methyl)-5-(6-amino-9H-purin-9-yl)tetrahydrofuran-3,4-diol (**16**)

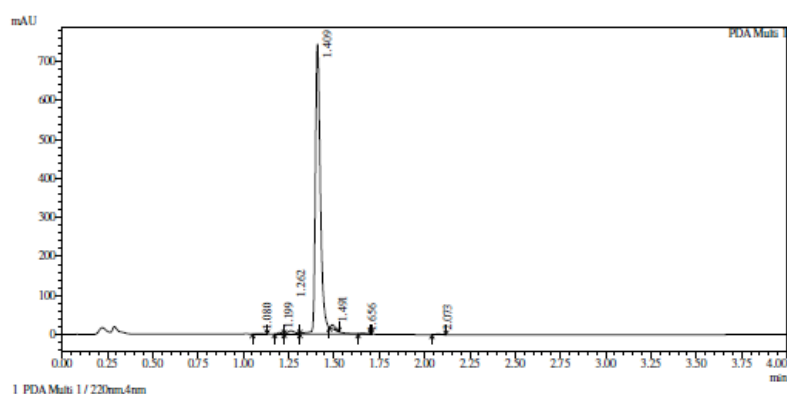

## Integration result

| PeakTable |           |           |            |        |         |         |
|-----------|-----------|-----------|------------|--------|---------|---------|
| Peak#     | Ret. Time | USP Width | Resolution | Height | Area    | Area %  |
| 1         | 1.080     | 0.061     | 0.000      | 1226   | 2823    | 0.182   |
| 2         | 1.199     | 0.045     | 2.235      | 3697   | 6006    | 0.387   |
| 3         | 1.262     | 0.073     | 1.066      | 8161   | 23077   | 1.487   |
| 4         | 1.409     | 0.050     | 2.389      | 744300 | 1498579 | 96.580  |
| 5         | 1.491     | 0.038     | 1.874      | 10411  | 14230   | 0.917   |
| 6         | 1.656     | 0.047     | 3.855      | 1963   | 3486    | 0.225   |
| 7         | 2.073     | 0.052     | 8.426      | 1868   | 3448    | 0.222   |
| Total     |           |           |            | 771627 | 1551649 | 100.000 |



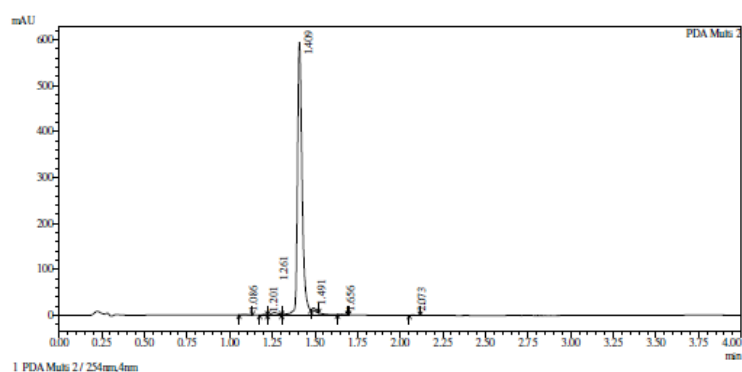

Integration result

| PDA Ch2 254nm |           | PeakTable |            |        |         |         |
|---------------|-----------|-----------|------------|--------|---------|---------|
| Peak#         | Ret. Time | USP Width | Resolution | Height | Area    | Area %  |
| 1             | 1.086     | 0.065     | 0.000      | 776    | 1792    | 0.151   |
| 2             | 1.201     | 0.051     | 1.988      | 1362   | 2224    | 0.187   |
| 3             | 1.261     | 0.072     | 0.973      | 5489   | 15103   | 1.270   |
| 4             | 1.409     | 0.048     | 2.451      | 593115 | 1158941 | 97.489  |
| 5             | 1.491     | 0.037     | 1.918      | 5790   | 7794    | 0.656   |
| 6             | 1.656     | 0.047     | 3.933      | 1109   | 1904    | 0.160   |
| 7             | 2.073     | 0.046     | 9.012      | 592    | 1041    | 0.088   |
| Total         |           |           |            | 608233 | 1188798 | 100.000 |

**HRMC (2S,3S,4R,5R)-2-(((1H-Indazol-7-yl)thio)methyl)-5-(6-amino-9H-purin-9-yl)tetrahydrofuran-3,4-diol (**16**)**

Compound Table

| Label                         | Tgt Score | Mass Error (ppm) | Tgt Formula     | Obs. RT | Ref. Mass | Obs. Mass |
|-------------------------------|-----------|------------------|-----------------|---------|-----------|-----------|
| Cpd 1: C17 H17 N7 O3 S; 1.547 | 99.21     | -0.76            | C17 H17 N7 O3 S | 1.547   | 399.1114  | 399.1111  |

| Obs. m/z | Obs. RT | Obs. Mass | Tgt Formula     | Tgt Mass | Tgt Mass Error (ppm) | Find Cps Algorithm |
|----------|---------|-----------|-----------------|----------|----------------------|--------------------|
| 400.1187 | 1.547   | 399.1111  | C17 H17 N7 O3 S | 399.1114 | -0.76                | Find by Formula    |

Compound Chromatograms

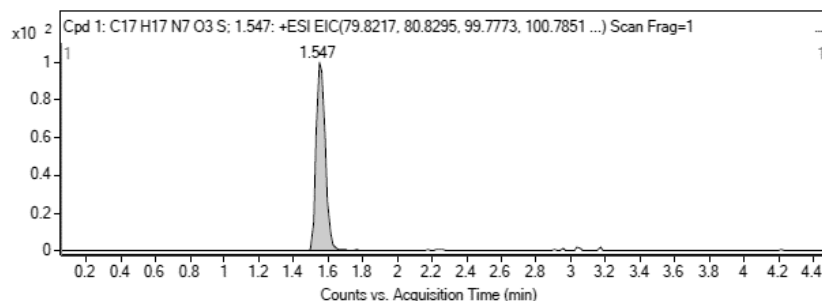

MS Zoomed Spectrum

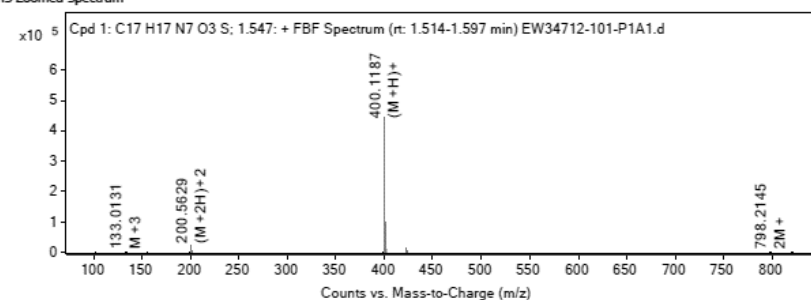

MS Spectrum Peak List

| Obs. m/z | Charge | Abund   | Ion/Isotope |
|----------|--------|---------|-------------|
| 133.0131 | 3      | 1616.92 | [M+3]       |
| 200.5629 | 2      | 20456.9 | [(M+2H)+2]  |

|          |   |                     |
|----------|---|---------------------|
| 201.0662 | 2 | 5054.11 [(M+2H)+2]  |
| 400.1187 | 1 | 4441.94.88 [(M+H)+] |
| 401.1209 | 1 | 94815.27 [(M+H)+]   |
| 402.1177 | 1 | 29685.77 [(M+H)+]   |
| 422.0997 | 1 | 12629.72 [(M+Na)+]  |
| 423.1028 | 1 | 2998.7 [(M+Na)+]    |
| 424.0982 | 1 | 1082.64 [(M+Na)+]   |
| 798.2145 | 1 | 1554.26 2M+         |

MS Zoomed Spectrum

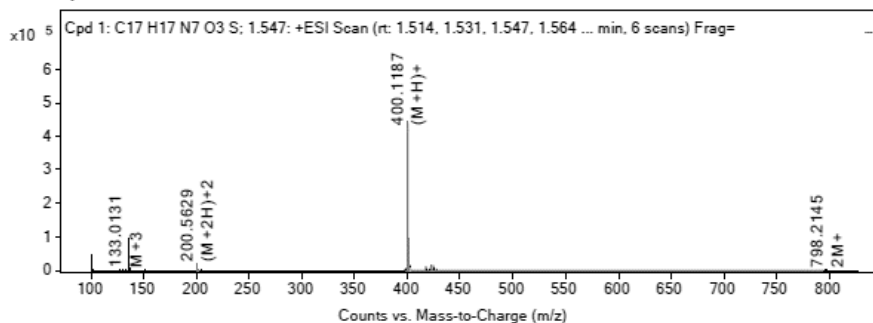

MS Spectrum Peak List

| Obs. m/z | Charge | Abund      | Ion/Isotope | Tgt Mass Error (ppm) |
|----------|--------|------------|-------------|----------------------|
| 133.0131 | 3      | 1616.92    | M+3         | 176.63               |
| 200.5629 | 2      | 20456.9    | (M+2H)+2    | 0.42                 |
| 201.0662 | 2      | 5054.11    | (M+2H)+2    | -9.58                |
| 400.1187 | 1      | 4441.94.88 | (M+H)+      | -0.28                |
| 401.1209 | 1      | 94815.27   | (M+H)+      | 0.71                 |
| 402.1177 | 1      | 29685.77   | (M+H)+      | 0.88                 |
| 422.0997 | 1      | 12629.72   | (M+Na)+     | 2.06                 |
| 423.1028 | 1      | 2998.7     | (M+Na)+     | 0.66                 |
| 424.0982 | 1      | 1082.64    | (M+Na)+     | 4.25                 |
| 798.2145 | 1      | 1554.26    | 2M+         | 9.57                 |

— End Of Report —

<sup>1</sup>H NMR (2R,3R,4S,5S)-2-(6-Aminopurin-9-yl)-5-(imidazo[1,5-a]pyridine-7-ylsulfanylmethyl) tetrahydrofuran-3,4-diol (**17**)

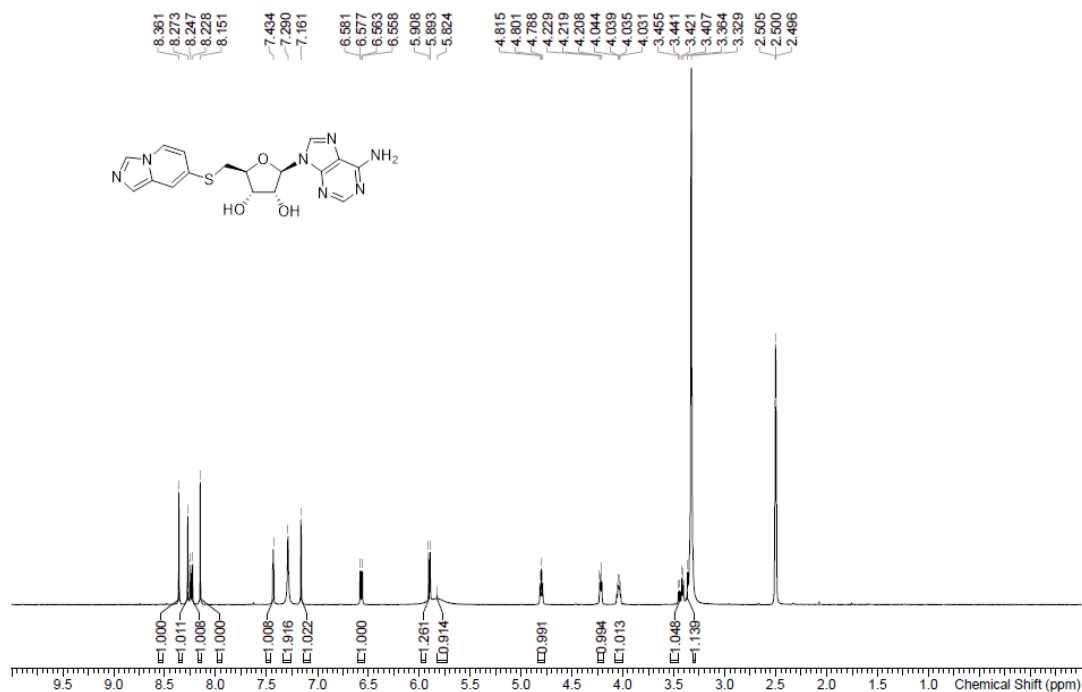

<sup>13</sup>C NMR (2R,3R,4S,5S)-2-(6-Aminopurin-9-yl)-5-(imidazo[1,5-a]pyridine-7-ylsulfanylmethyl) tetrahydrofuran-3,4-diol (**17**)

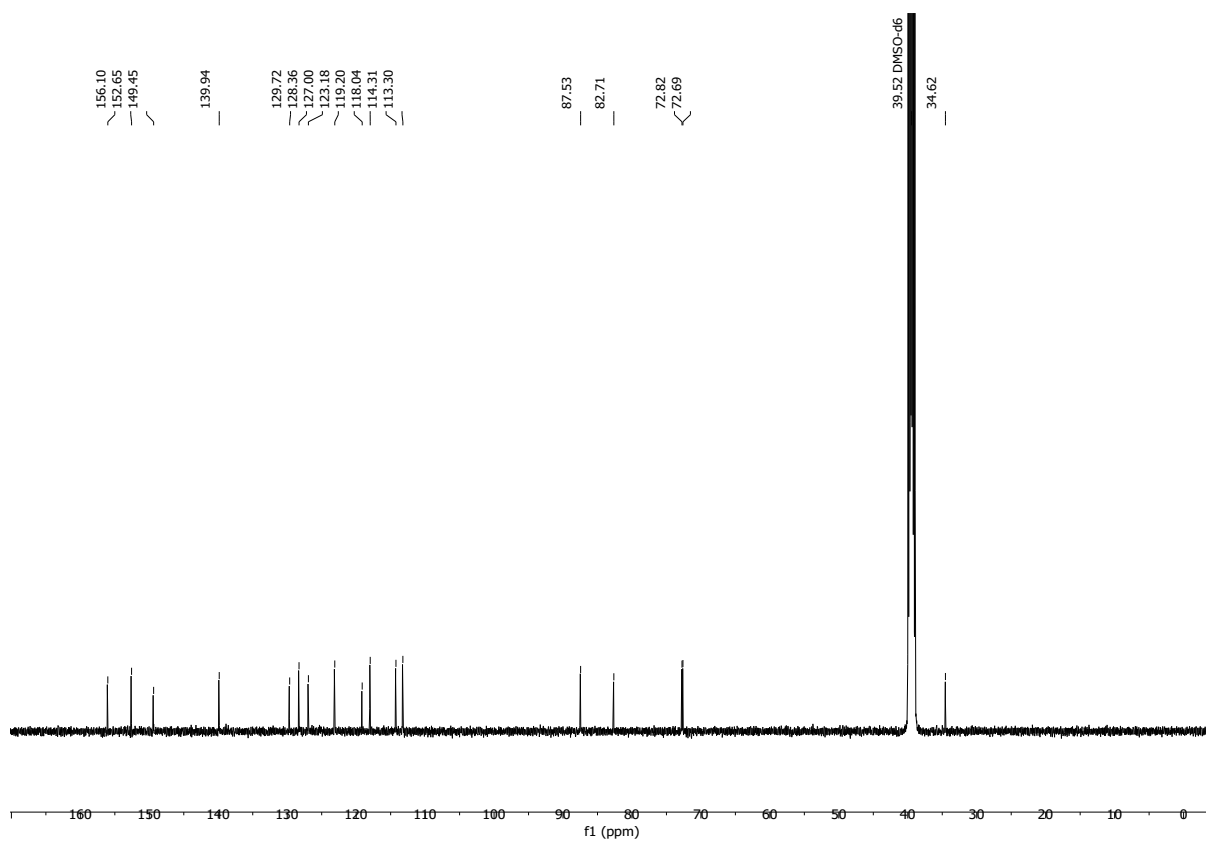

**HPLC** (2*R*,3*R*,4*S*,5*S*)-2-(6-Aminopurin-9-yl)-5-(imidazo[1,5-*a*]pyridine-7-ylsulfanylmethyl) tetrahydrofuran-3,4-diol (**17**)

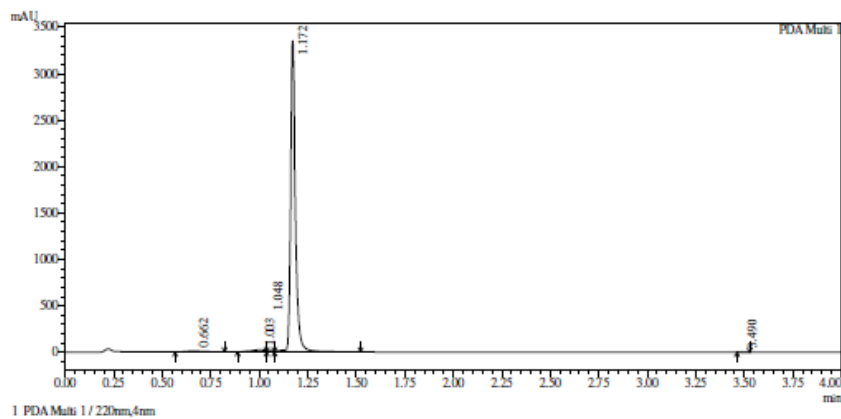

Integration result

| PeakTable |           |           |            |         |         |         |
|-----------|-----------|-----------|------------|---------|---------|---------|
| Peak#     | Ret. Time | USP Width | Resolution | Height  | Area    | Area %  |
| 1         | 0.662     | 0.163     | 0.000      | 10342   | 62083   | 1.037   |
| 2         | 1.003     | 0.153     | 2.158      | 22221   | 109086  | 1.822   |
| 3         | 1.048     | 0.364     | 0.174      | 15616   | 33664   | 0.562   |
| 4         | 1.172     | 0.040     | 0.613      | 3348987 | 5781359 | 96.557  |
| 5         | 3.490     | 0.057     | 47.911     | 647     | 1296    | 0.022   |
| Total     |           |           |            | 3397813 | 5987488 | 100.000 |

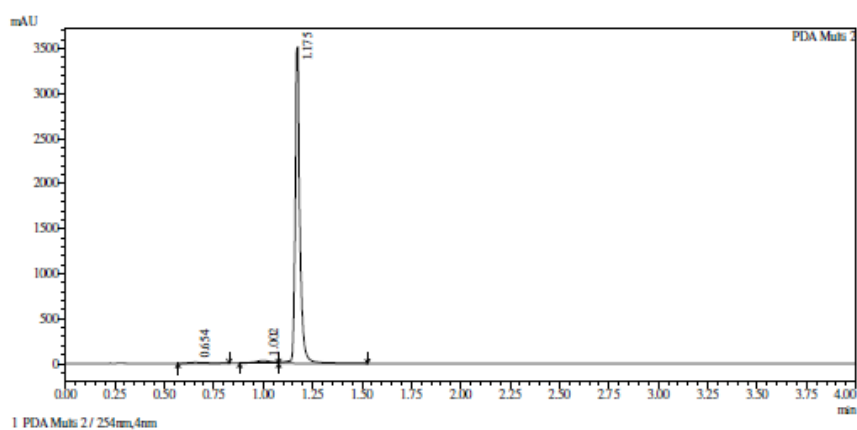

| Integration result |           |           |            |         |         |         |
|--------------------|-----------|-----------|------------|---------|---------|---------|
| PeakTable          |           |           |            |         |         |         |
| Peak#              | Ret. Time | USP Width | Resolution | Height  | Area    | Area %  |
| 1                  | 0.654     | 0.180     | 0.000      | 10105   | 68263   | 1.112   |
| 2                  | 1.002     | 0.143     | 2.149      | 31580   | 184359  | 3.004   |
| 3                  | 1.175     | 0.036     | 1.929      | 3516010 | 5885093 | 95.884  |
| Total              |           |           |            | 3557695 | 6137715 | 100.000 |

**HRMC** (2*R*,3*R*,4*S*,5*S*)-2-(6-Aminopurin-9-yl)-5-(imidazo[1,5-*a*]pyridine-7-ylsulfanylmethyl) tetrahydrofuran-3,4-diol (**17**)

Compound Table

| Label                         | Tgt Score | Mass Error (ppm) | Tgt Formula     | Obs. RT | Ref. Mass | Obs. Mass |
|-------------------------------|-----------|------------------|-----------------|---------|-----------|-----------|
| Cpd 1: C17 H17 N7 O3 S; 1.195 | 94.54     | -3.76            | C17 H17 N7 O3 S | 1.195   | 399.1114  | 399.1099  |

| Obs. m/z | Obs. RT | Obs. Mass | Tgt Formula     | Tgt Mass | Tgt Mass Error (ppm) | Find Cpd's Algorithm |
|----------|---------|-----------|-----------------|----------|----------------------|----------------------|
| 400.1176 | 1.195   | 399.1099  | C17 H17 N7 O3 S | 399.1114 | -3.76                | Find by Formula      |

Compound Chromatograms

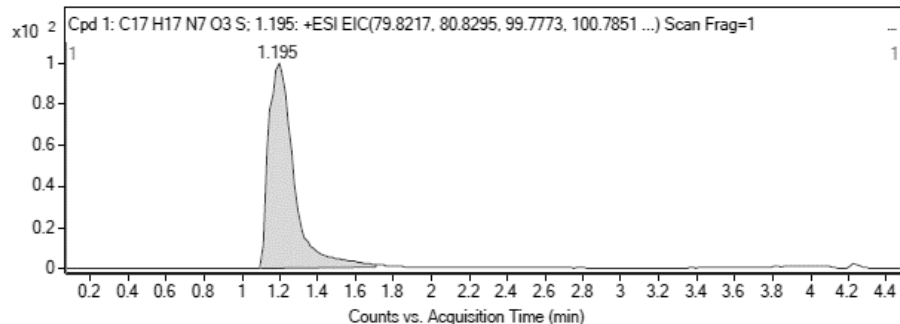

MS Zoomed Spectrum

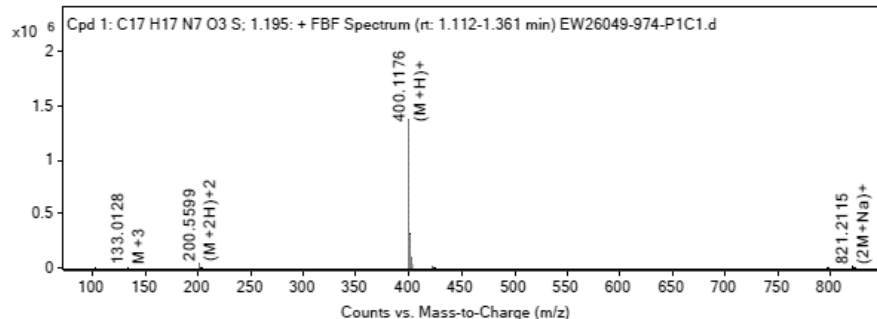

MS Spectrum Peak List

| Obs. m/z | Charge | Abund    | Ion/Isotope |
|----------|--------|----------|-------------|
| 200.5599 | 2      | 44219.67 | (M+2H)+2    |
| 201.0621 | 2      | 9302.93  | (M+2H)+2    |

|          |   |            |          |
|----------|---|------------|----------|
| 399.1079 | 1 | 11667.74   | M+       |
| 400.1176 | 1 | 1380646.63 | (M+H)+   |
| 401.1193 | 1 | 313413.34  | (M+H)+   |
| 402.1160 | 1 | 98309.98   | (M+H)+   |
| 422.0981 | 1 | 11562.54   | (M+Na)+  |
| 798.2137 | 1 | 4018.8     | 2M+      |
| 821.2115 | 1 | 11299.91   | (2M+Na)+ |
| 822.2134 | 1 | 4923.16    | (2M+Na)+ |

MS Zoomed Spectrum

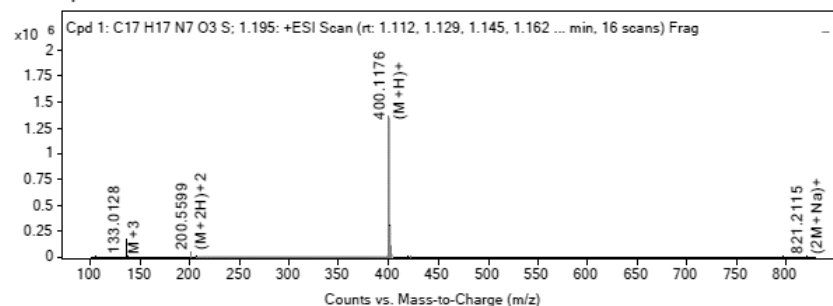

MS Spectrum Peak List

| Obs. m/z | Charge | Abund      | Ion/Isotope | Tgt Mass Error (ppm) |
|----------|--------|------------|-------------|----------------------|
| 200.5599 | 2      | 44219.67   | (M+2H)+2    | 15.38                |
| 201.0621 | 2      | 9302.93    | (M+2H)+2    | 10.72                |
| 399.1079 | 1      | 11667.74   | M+          | 7.3                  |
| 400.1176 | 1      | 1380646.63 | (M+H)+      | 2.64                 |
| 401.1193 | 1      | 313413.34  | (M+H)+      | 4.58                 |
| 402.1160 | 1      | 98309.98   | (M+H)+      | 4.55                 |
| 422.0981 | 1      | 11562.54   | (M+Na)+     | 5.94                 |
| 798.2137 | 1      | 4018.8     | 2M+         | 10.64                |
| 821.2115 | 1      | 11299.91   | (2M+Na)+    | 0.54                 |
| 822.2134 | 1      | 4923.16    | (2M+Na)+    | 1.25                 |

--- End Of Report ---

<sup>1</sup>H NMR (2R,3R,4S,5R)-2-(6-aminopurin-9-yl)-5-(1,3-benzothiazol-2-yloxymethyl)tetrahydrofuran-3,4-diol (**23**)

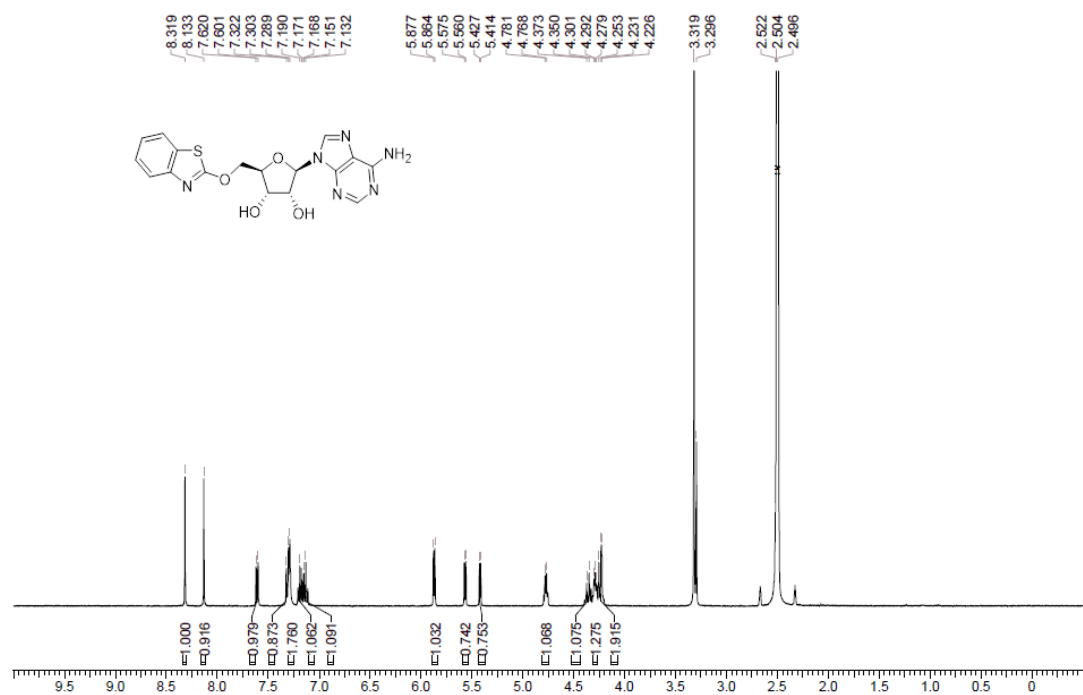

**HPLC (2R,3R,4S,5R)-2-(6-aminopurin-9-yl)-5-(1,3-benzothiazol-2-yloxymethyl)tetrahydrofuran-3,4-diol (23)**

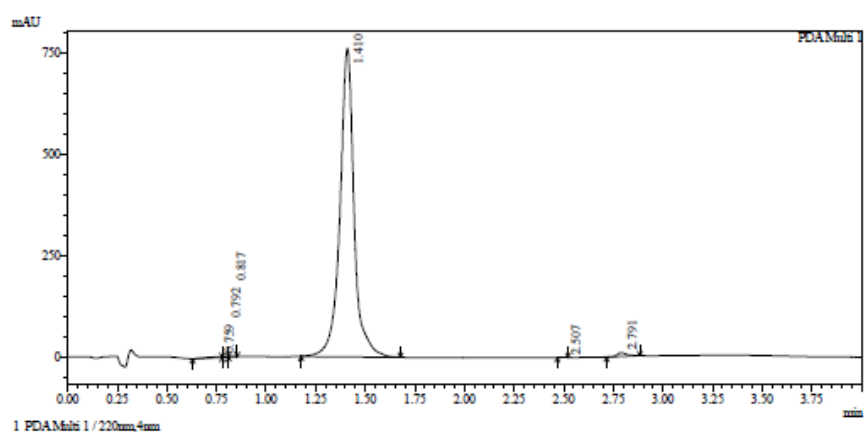

#### Integration result

| PeakTable     |           |           |            |        |         |         |
|---------------|-----------|-----------|------------|--------|---------|---------|
| PDA Ch1 220nm |           |           |            |        |         |         |
| Peak#         | Ret. Time | USP Width | Resolution | Height | Area    | Area %  |
| 1             | 0.759     | 0.152     | 0.000      | 1900   | 11739   | 0.305   |
| 2             | 0.792     | 0.081     | 0.287      | 1500   | 2633    | 0.069   |
| 3             | 0.817     | 0.094     | 0.290      | 952    | 1554    | 0.040   |
| 4             | 1.410     | 0.119     | 5.568      | 763684 | 3795218 | 98.755  |
| 5             | 2.507     | 0.042     | 13.607     | 531    | 1082    | 0.028   |
| 6             | 2.791     | 0.087     | 4.386      | 9091   | 30844   | 0.803   |
| Total         |           |           |            | 777658 | 3843069 | 100.000 |

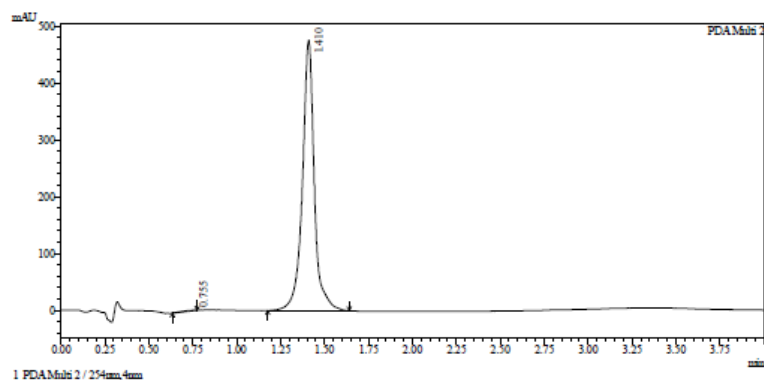

#### Integration result

| PeakTable |           |           |            |        |         |         |
|-----------|-----------|-----------|------------|--------|---------|---------|
| Peak#     | Ret. Time | USP Width | Resolution | Height | Area    | Area %  |
| 1         | 0.755     | 0.156     | 0.000      | 771    | 6723    | 0.299   |
| 2         | 1.410     | 0.114     | 4.858      | 476220 | 2243465 | 99.701  |
| Total     |           |           |            | 476991 | 2250188 | 100.000 |

### HRMC (2*R*,3*R*,4*S*,5*R*)-2-(6-aminopurin-9-yl)-5-(1,3-benzothiazol-2-yloxymethyl)tetrahydrofuran-3,4-diol (**23**)

#### Compound Table

| Label                         | Tgt Score | Mass Error (ppm) | Tgt Formula     | Obs. RT | Ref. Mass | Obs. Mass |
|-------------------------------|-----------|------------------|-----------------|---------|-----------|-----------|
| Cpd 1: C17 H16 N6 O4 S; 1.465 | 98.84     | 1.31             | C17 H16 N6 O4 S | 1.465   | 400.0954  | 400.0959  |

| Obs. <i>m/z</i> | Obs. RT | Obs. Mass | Tgt Formula     | Tgt Mass | Tgt Mass Error (ppm) | Find Cpd's Algorithm |
|-----------------|---------|-----------|-----------------|----------|----------------------|----------------------|
| 401.1031        | 1.465   | 400.0959  | C17 H16 N6 O4 S | 400.0954 | 1.31                 | Find by Formula      |

#### Compound Chromatograms

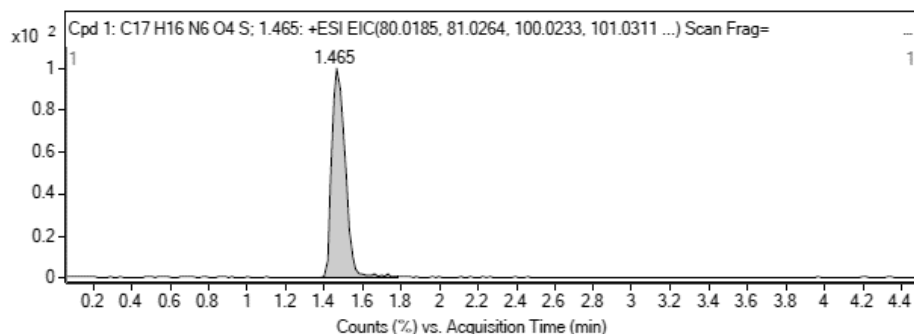

#### MS Zoomed Spectrum

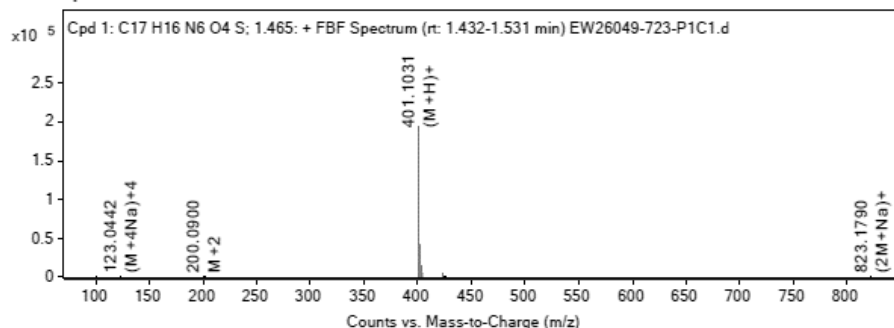

#### MS Spectrum Peak List

| Obs. <i>m/z</i> | Charge | Abund | Ion/Isotope |
|-----------------|--------|-------|-------------|
| 123.0442        | 4      | 88.43 | (M+4Na)+4   |
| 200.0900        | 2      | 86.06 | (M+2)       |

|          |   |                   |
|----------|---|-------------------|
| 201.1031 | 2 | 70.64 [(M+2H)+2]  |
| 401.1031 | 1 | 1935.24 [(M+H)+]  |
| 402.1054 | 1 | 41576.28 [(M+H)+] |
| 403.1031 | 1 | 14133.26 [(M+H)+] |
| 423.0849 | 1 | 4287.03 [(M+Na)+] |
| 424.0883 | 1 | 1036.19 [(M+Na)+] |
| 425.0861 | 1 | 340.45 [(M+Na)+]  |
| 823.179  | 1 | 99.71 [(2M+Na)+]  |

MS Zoomed Spectrum

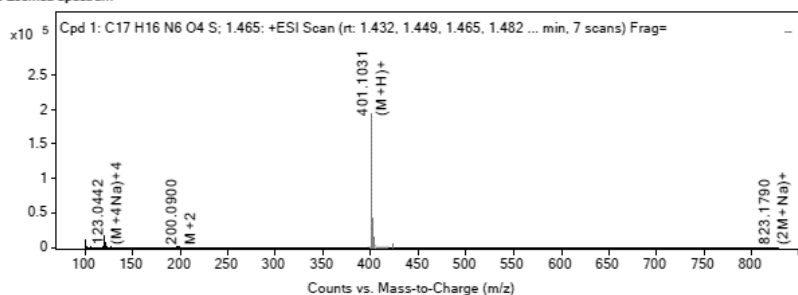

MS Spectrum Peak List

| Obs. m/z | Charge | Abund    | Ion/Isotope | Tgt Mass Error (ppm) |
|----------|--------|----------|-------------|----------------------|
| 123.0442 | 4      | 88.23    | [(M+4Na)+4] | -253.41              |
| 200.0900 | 2      | 85.06    | [M+2]       | -214.28              |
| 201.1031 | 2      | 70.64    | [(M+2H)+2]  | -242.4               |
| 401.1031 | 1      | 1935.24  | [(M+H)+]    | -1.17                |
| 402.1054 | 1      | 41576.28 | [(M+H)+]    | -0.27                |
| 403.1031 | 1      | 14133.26 | [(M+H)+]    | -2.28                |
| 423.0849 | 1      | 4287.03  | [(M+Na)+]   | -0.78                |
| 424.0883 | 1      | 1036.19  | [(M+Na)+]   | -2.6                 |
| 425.0861 | 1      | 340.45   | [(M+Na)+]   | -4.68                |
| 823.179  | 1      | 99.71    | [(2M+Na)+]  | 1.15                 |

--- End Of Report ---

**<sup>1</sup>H NMR** 2*R*,3*R*,4*S*,5*R*)-2-(6-Aminopurin-9-yl)-5-[(1,3-benzothiazol-2-ylamino)methyl] tetrahydrofuran-3,4-diol (24)

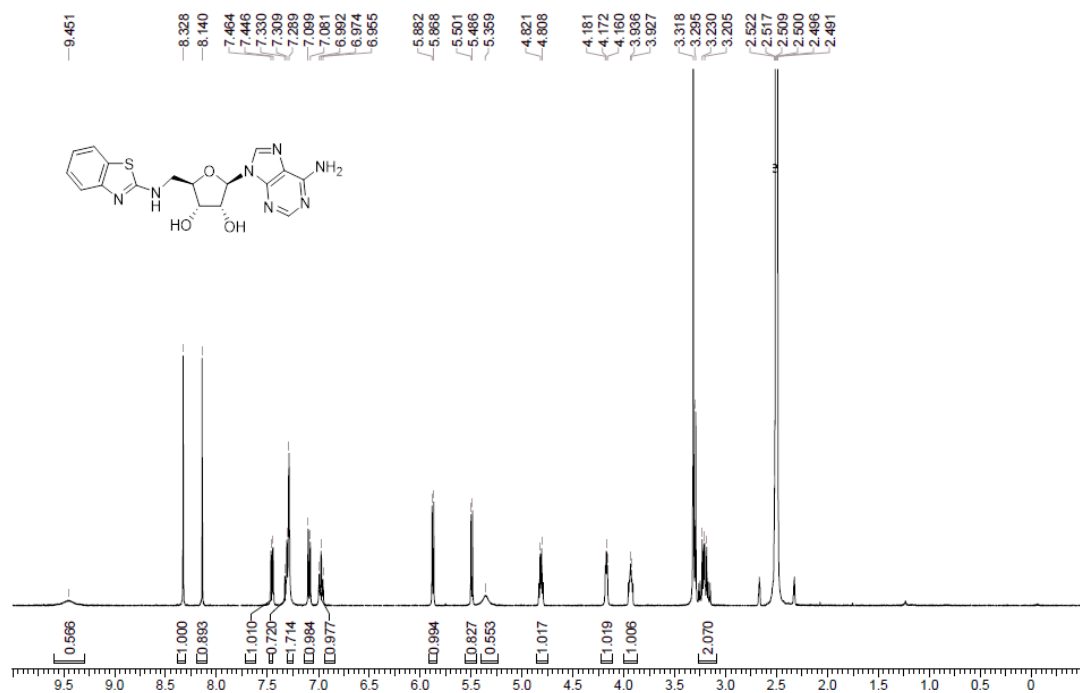



# HPLC 2*R,3R,4S,5R*)-2-(6-Aminopurin-9-yl)-5-[(1,3-benzothiazol-2-ylamino)methyl] tetrahydrofuran-3,4-diol (**24**)

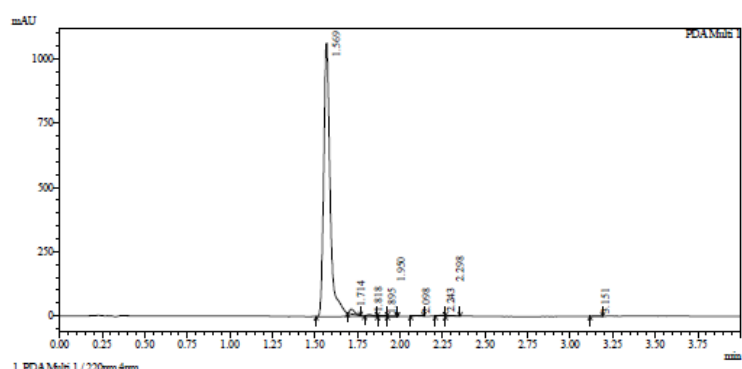

Integration result

| PeakTable |           |           |            |         |         |         |
|-----------|-----------|-----------|------------|---------|---------|---------|
| Peak#     | Ret. Time | USP Width | Resolution | Height  | Area    | Area %  |
| 1         | 1.569     | 0.066     | 0.000      | 1063984 | 2852502 | 97.489  |
| 2         | 1.714     | 0.053     | 2.433      | 18519   | 35180   | 1.202   |
| 3         | 1.818     | 0.055     | 1.902      | 5814    | 11667   | 0.399   |
| 4         | 1.895     | 0.051     | 1.450      | 1468    | 2728    | 0.093   |
| 5         | 1.950     | 0.049     | 1.098      | 663     | 1069    | 0.037   |
| 6         | 2.098     | 0.066     | 2.587      | 2040    | 4651    | 0.159   |
| 7         | 2.243     | 0.059     | 2.323      | 3383    | 6906    | 0.236   |
| 8         | 2.298     | 0.101     | 0.686      | 2277    | 7191    | 0.246   |
| 9         | 3.151     | 0.063     | 10.388     | 1743    | 4079    | 0.139   |
| Total     |           |           |            | 1099891 | 2925974 | 100.000 |

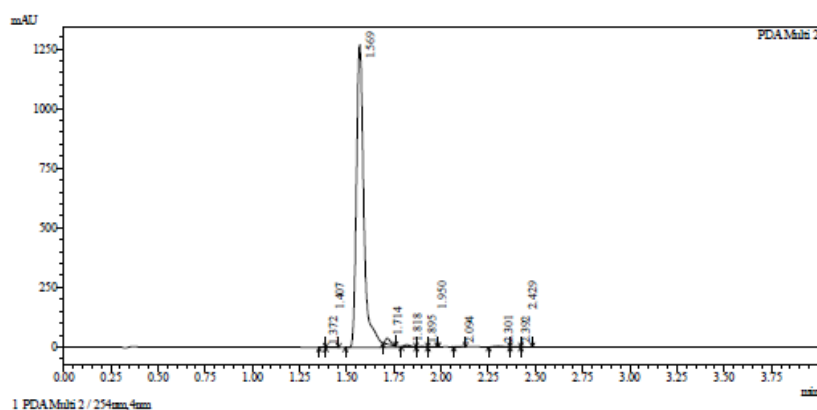

Integration result

| PeakTable |           |           |            |         |         |         |
|-----------|-----------|-----------|------------|---------|---------|---------|
| Peak#     | Ret. Time | USP Width | Resolution | Height  | Area    | Area %  |
| 1         | 1.372     | 0.052     | 0.000      | 705     | 1086    | 0.030   |
| 2         | 1.407     | 0.076     | 0.549      | 795     | 1746    | 0.048   |
| 3         | 1.569     | 0.068     | 2.267      | 1269004 | 3549920 | 97.422  |
| 4         | 1.714     | 0.051     | 2.442      | 25467   | 45291   | 1.243   |
| 5         | 1.818     | 0.057     | 1.920      | 8014    | 16255   | 0.446   |
| 6         | 1.895     | 0.050     | 1.445      | 2257    | 4291    | 0.118   |
| 7         | 1.950     | 0.044     | 1.165      | 747     | 1247    | 0.034   |
| 8         | 2.094     | 0.054     | 2.954      | 1593    | 3019    | 0.083   |
| 9         | 2.301     | 0.101     | 2.674      | 3897    | 14466   | 0.397   |
| 10        | 2.392     | 0.205     | 0.592      | 1664    | 4689    | 0.129   |
| 11        | 2.429     | 0.824     | 0.073      | 1111    | 1831    | 0.050   |
| Total     |           |           |            | 1315256 | 3643841 | 100.000 |

**HRMC 2*R,3R,4S,5R*)-2-(6-Aminopurin-9-yl)-5-[(1,3-benzothiazol-2-ylamino)methyl] tetrahydrofuran-3,4-diol (**24**)**

**Compound Table**

| Label                         | Tgt Score | Mass Error (ppm) | Tgt Formula     | Obs. RT | Ref. Mass | Obs. Mass |
|-------------------------------|-----------|------------------|-----------------|---------|-----------|-----------|
| Cpd 1: C17 H17 N7 O3 S; 1.595 | 98.29     | 2.05             | C17 H17 N7 O3 S | 1.595   | 399.1114  | 399.1122  |

| Obs. <i>m/z</i> | Obs. RT | Obs. Mass | Tgt Formula     | Tgt Mass | Tgt Mass Error (ppm) | Find Cpd's Algorithm |
|-----------------|---------|-----------|-----------------|----------|----------------------|----------------------|
| 422.1002        | 1.595   | 399.1122  | C17 H17 N7 O3 S | 399.1114 | 2.05                 | Find by Formula      |

**Compound Chromatograms**

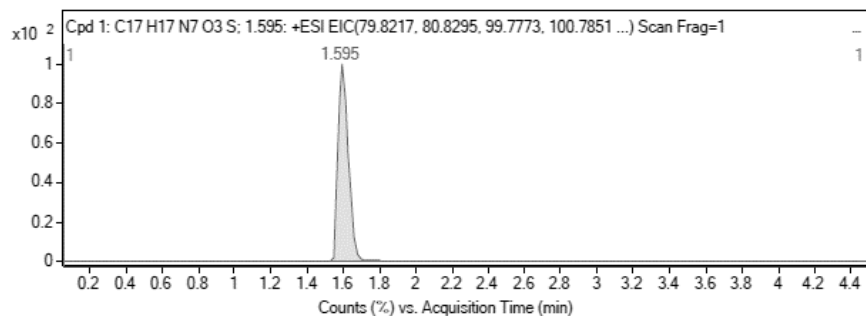

**MS Zoomed Spectrum**

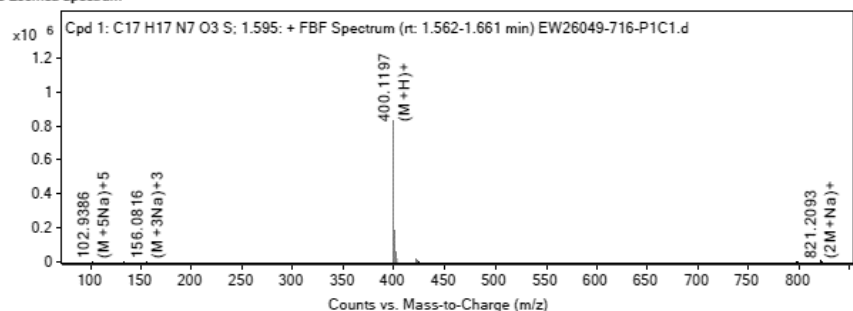

**MS Spectrum Peak List**

| Obs. <i>m/z</i> | Charge | Abund     | Ion/Isotope        |
|-----------------|--------|-----------|--------------------|
| 399.1116        | 1      | 7979.15   | M+                 |
| 400.1197        | 1      | 831777.56 | [M+H] <sup>+</sup> |

|          |   |           |                      |
|----------|---|-----------|----------------------|
| 401.1214 | 1 | 183561.86 | [M+H] <sup>+</sup>   |
| 402.1183 | 1 | 57424.29  | [M+H] <sup>+</sup>   |
| 422.1002 | 1 | 22912.8   | [M+Na] <sup>+</sup>  |
| 423.1037 | 1 | 5037.99   | [M+Na] <sup>+</sup>  |
| 424.1011 | 1 | 1867.23   | [M+Na] <sup>+</sup>  |
| 798.216  | 1 | 1916.53   | 2M+                  |
| 821.2093 | 1 | 5269.97   | [2M+Na] <sup>+</sup> |
| 822.2124 | 1 | 2410.98   | [2M+Na] <sup>+</sup> |

**MS Zoomed Spectrum**

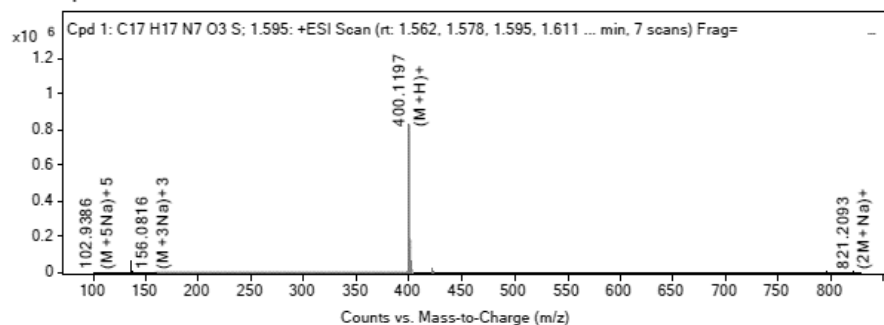

**MS Spectrum Peak List**

| Obs. <i>m/z</i> | Charge | Abund     | Ion/Isotope          | Tgt Mass Error (ppm) |
|-----------------|--------|-----------|----------------------|----------------------|
| 399.1116        | 1      | 7979.15   | M+                   | -2.05                |
| 400.1197        | 1      | 831777.56 | [M+H] <sup>+</sup>   | -2.54                |
| 401.1214        | 1      | 183561.86 | [M+H] <sup>+</sup>   | -0.65                |
| 402.1183        | 1      | 57424.29  | [M+H] <sup>+</sup>   | -0.79                |
| 422.1002        | 1      | 22912.8   | [M+Na] <sup>+</sup>  | 0.84                 |
| 423.1037        | 1      | 5037.99   | [M+Na] <sup>+</sup>  | -1.34                |
| 424.1011        | 1      | 1867.23   | [M+Na] <sup>+</sup>  | -2.79                |
| 798.216         | 1      | 1916.53   | 2M+                  | 7.71                 |
| 821.2093        | 1      | 5269.97   | [2M+Na] <sup>+</sup> | 3.19                 |
| 822.2124        | 1      | 2410.98   | [2M+Na] <sup>+</sup> | 2.44                 |

--- End Of Report ---

**SFC 2*R*,3*R*,4*S*,5*R*)-2-(6-Aminopurin-9-yl)-5-[(1,3-benzothiazol-2-ylamino)methyl] tetrahydrofuran-3,4-diol (**24**)**

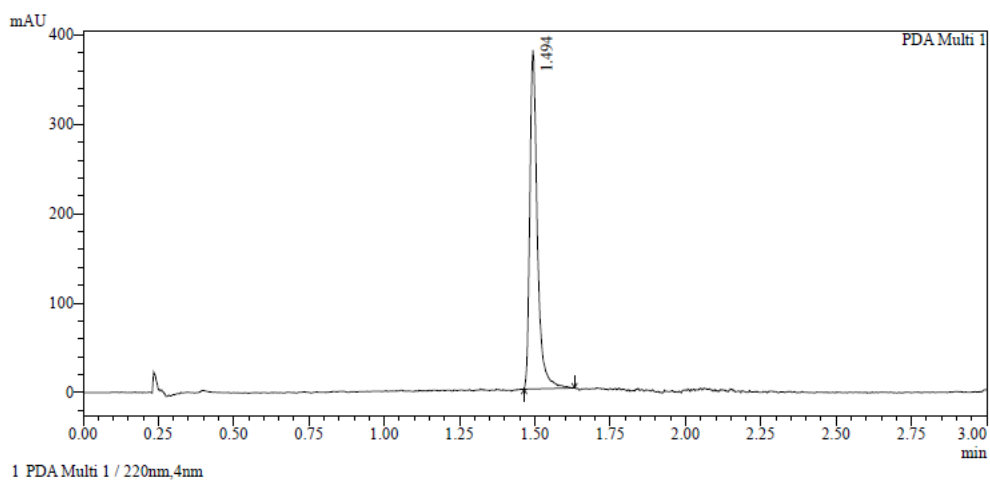

**Integration Results**

| PeakTable |           |           |            |        |        |         |
|-----------|-----------|-----------|------------|--------|--------|---------|
| Peak#     | Ret. Time | USP Width | Resolution | Height | Area   | Area %  |
| 1         | 1.494     | 0.048     | 0.000      | 370703 | 662295 | 100.000 |
| Total     |           |           |            | 370703 | 662295 | 100.000 |

**<sup>1</sup>H NMR 6-Methylquinoline-2-thiol (**73**)**

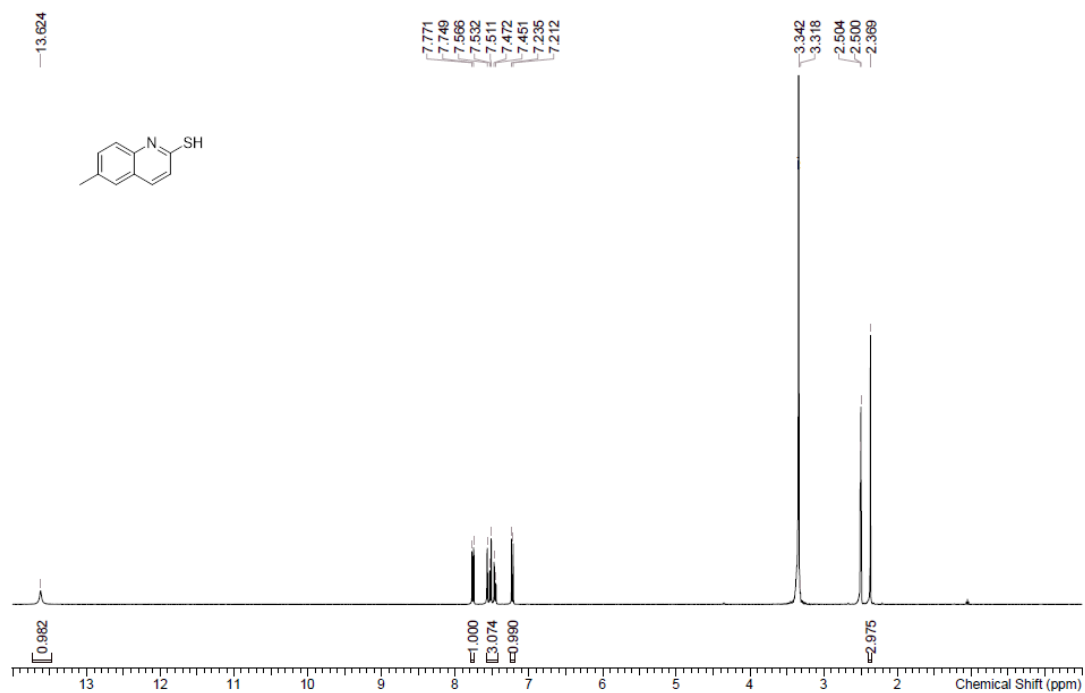

**LCMS 6-Methylquinoline-2-thiol (**73**)**

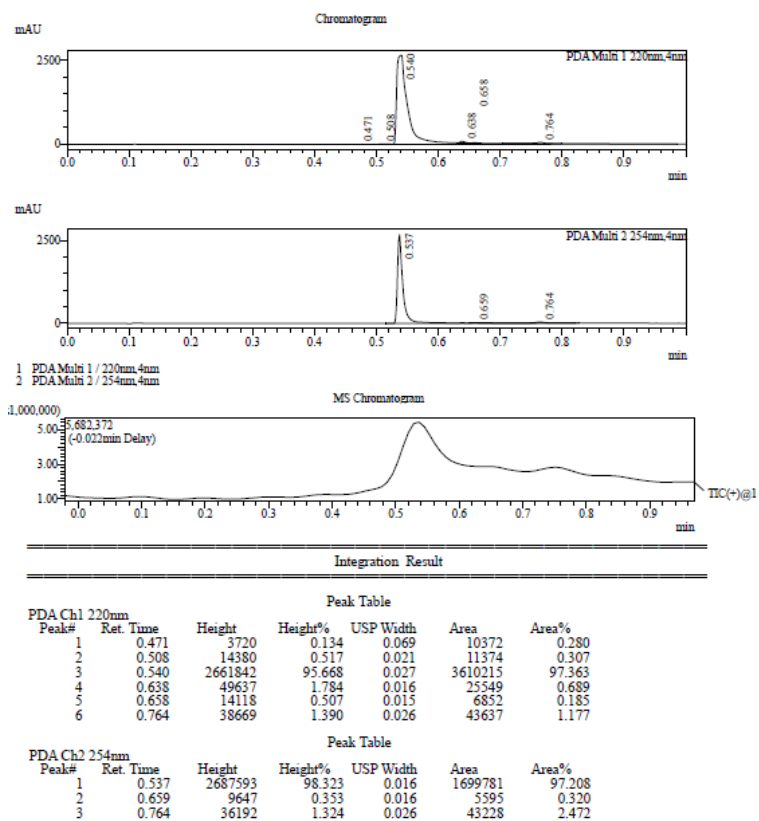

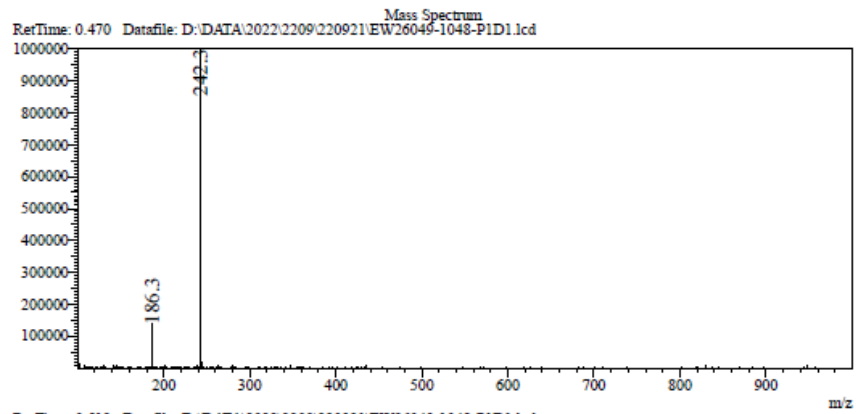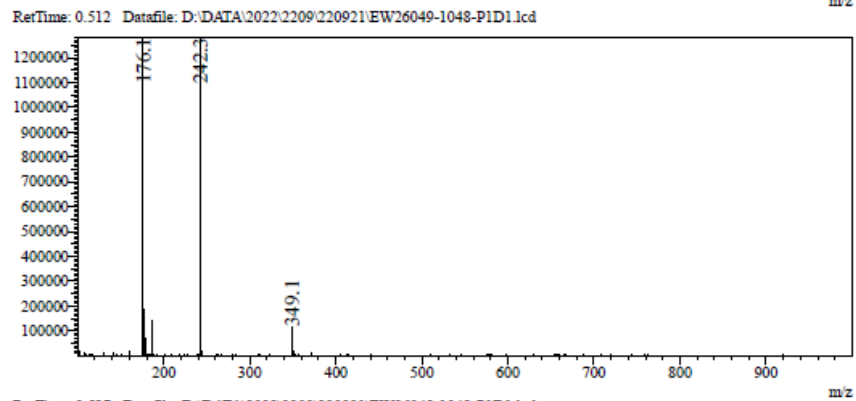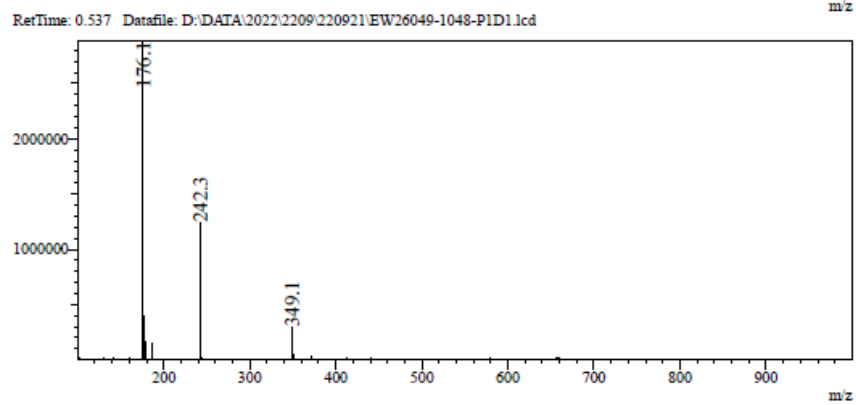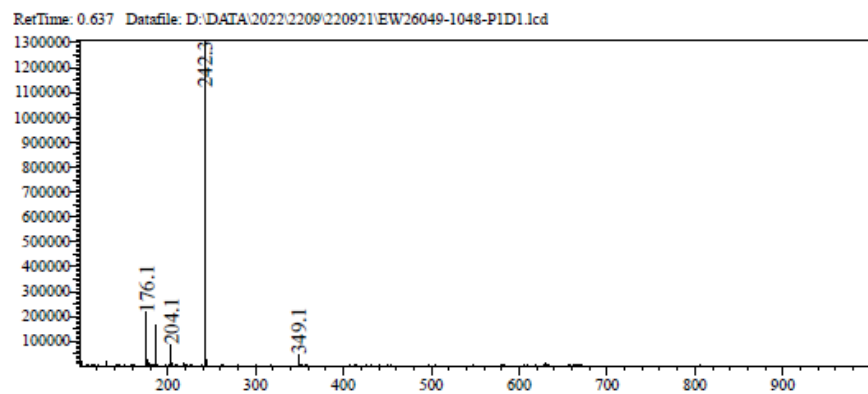

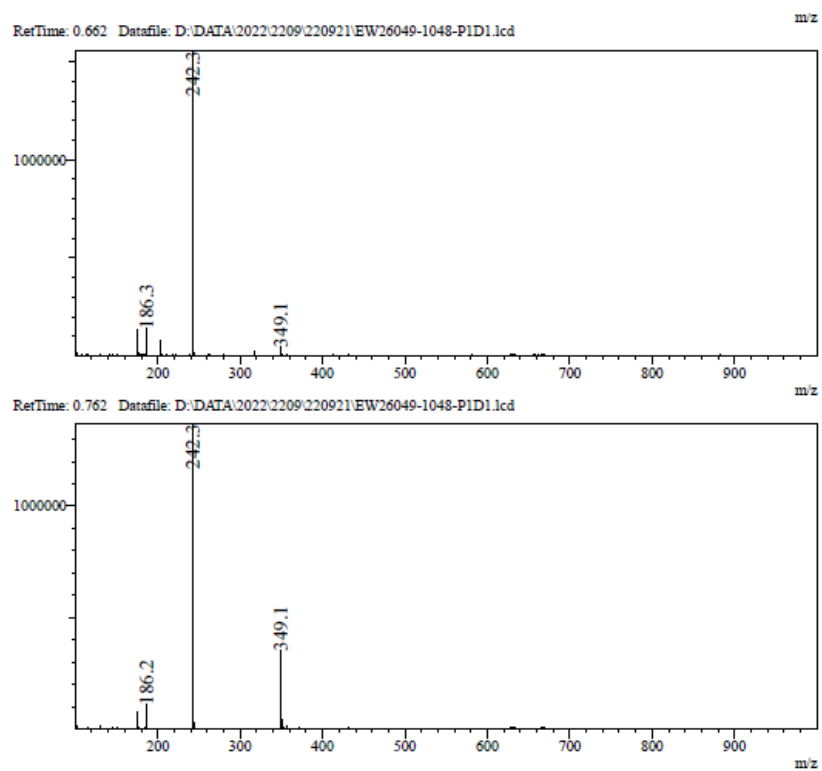

**<sup>1</sup>H NMR 7-Methyl-1-oxido-quinolin-1-ium (75)**

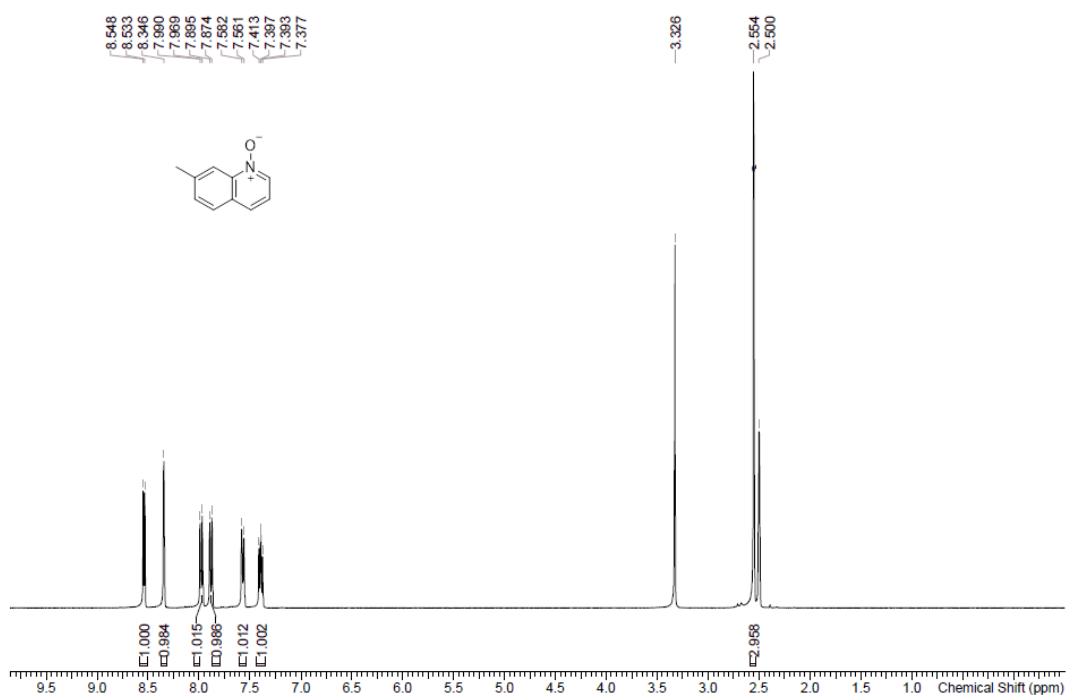

# LCMS 7-Methyl-1-oxido-quinolin-1-ium (75)

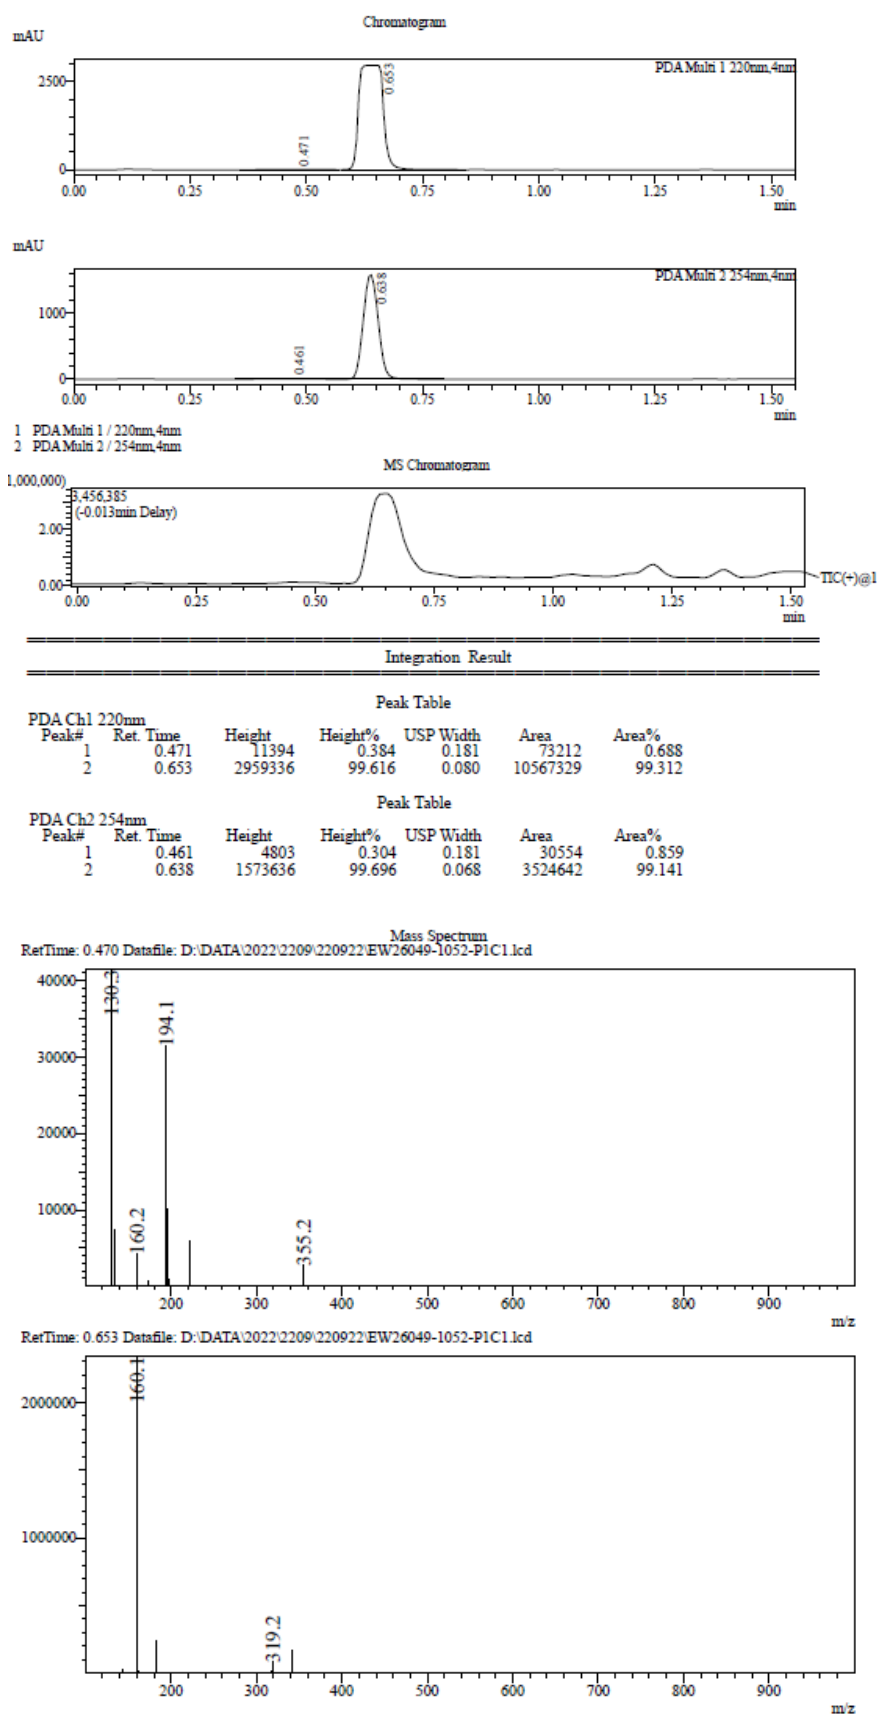

# <sup>1</sup>H NMR 2-Chloro-7-methyl-quinoline (76)

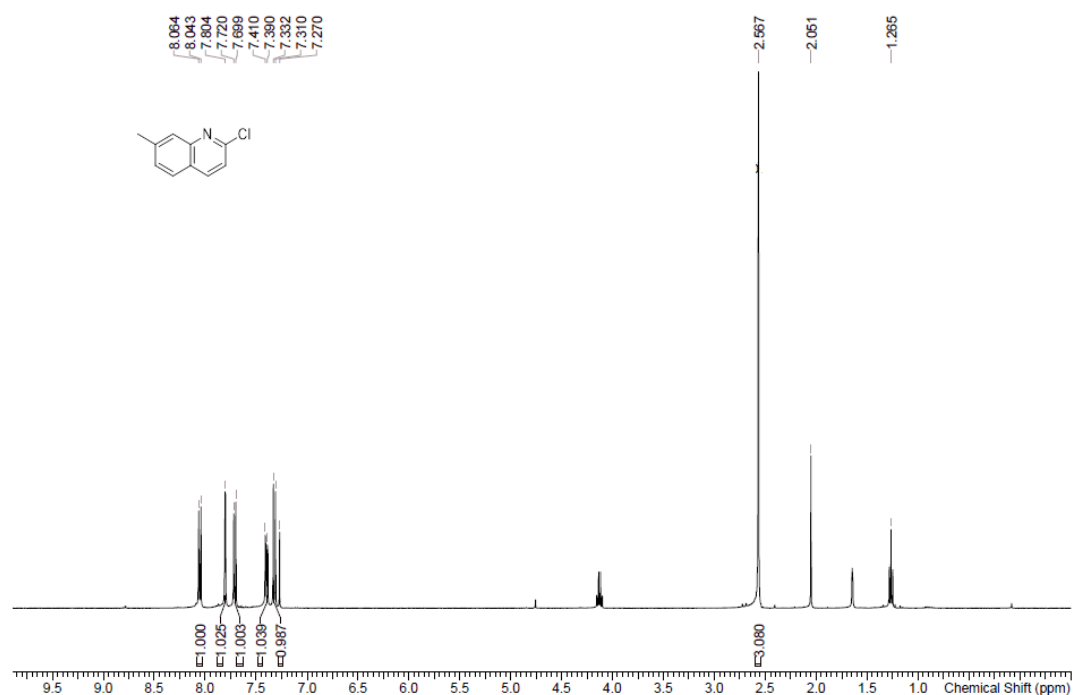

## LCMS 2-Chloro-7-methyl-quinoline (76)

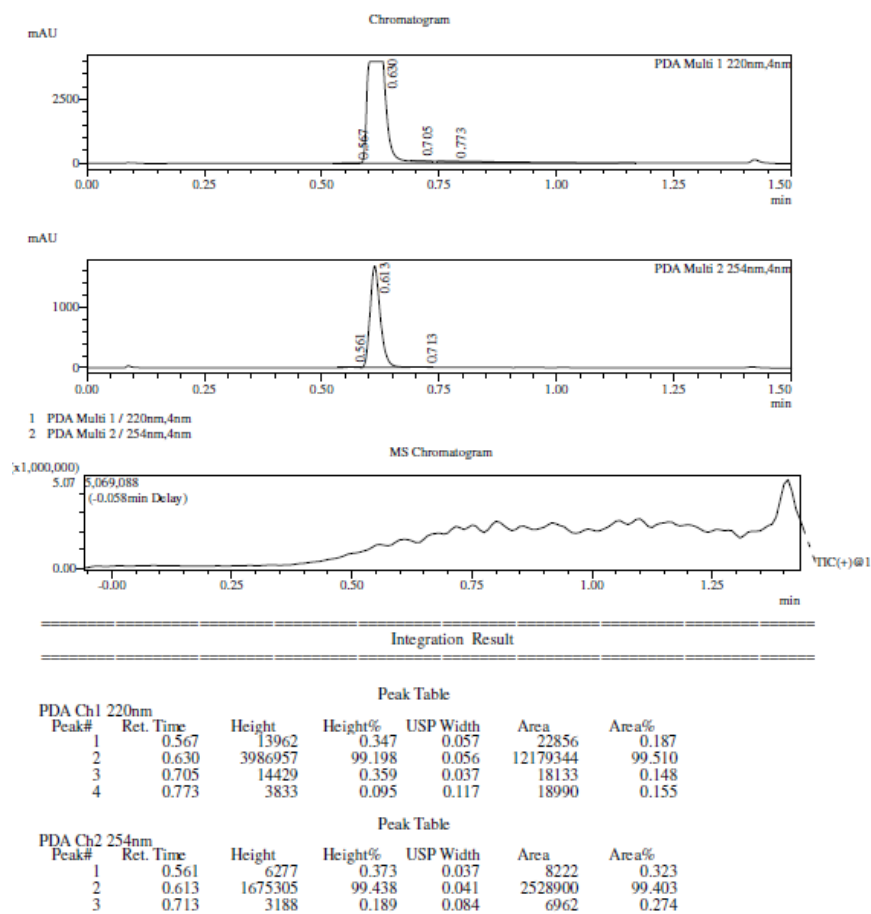



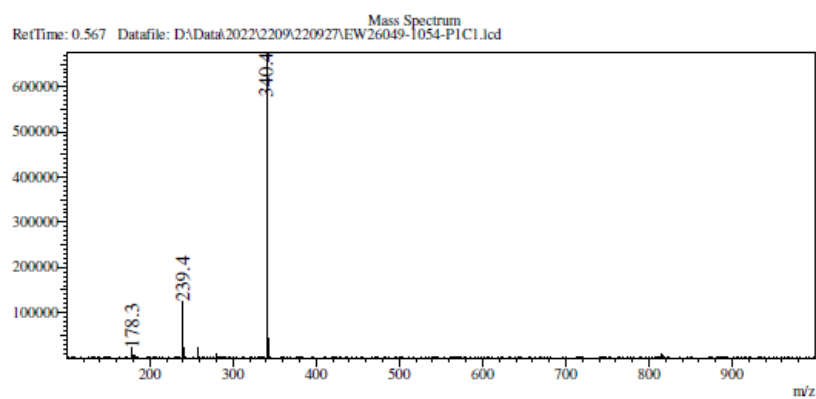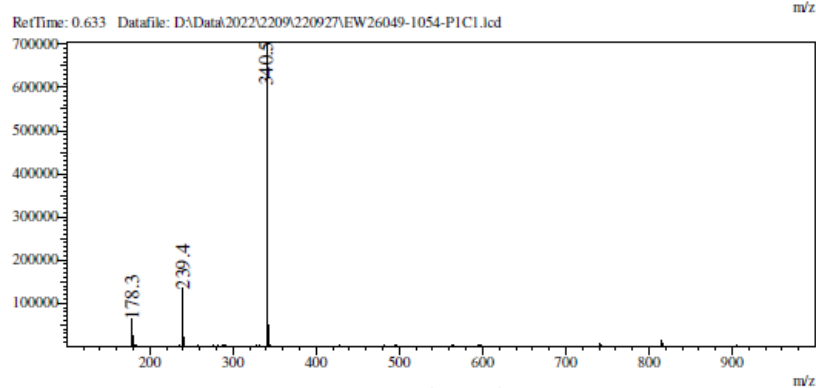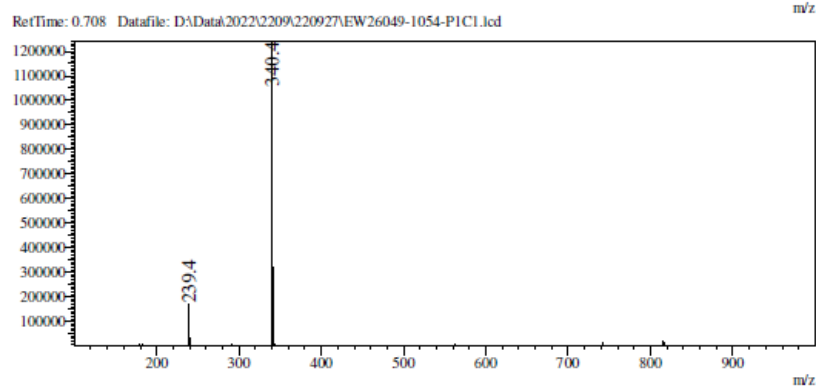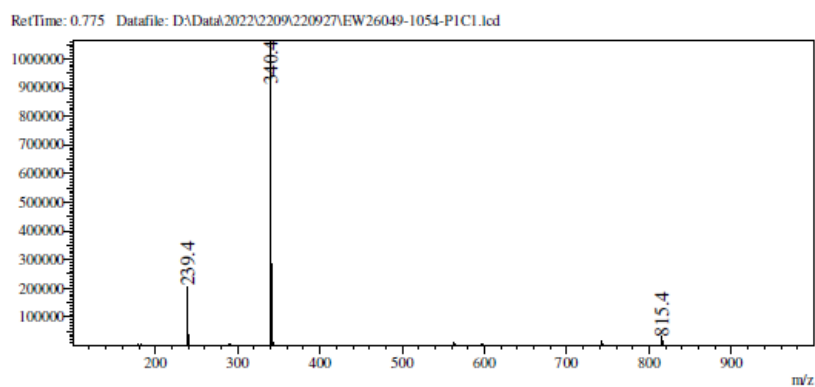

# <sup>1</sup>H NMR 7-Methylquinoline-2-thiol (**77**)

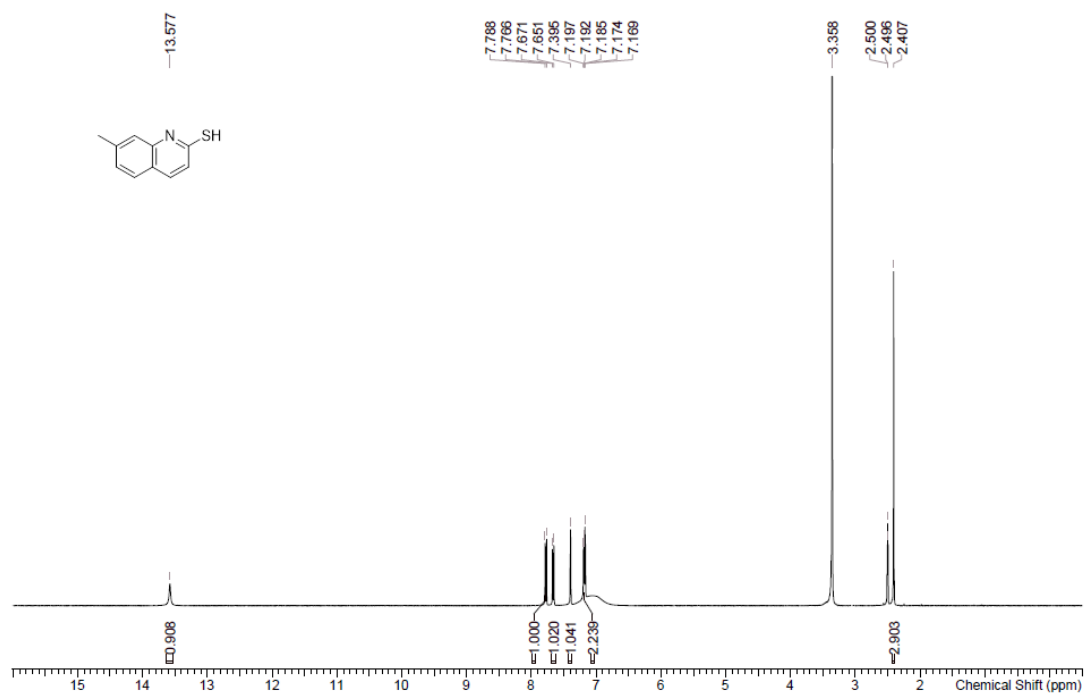

## LCMS 7-Methylquinoline-2-thiol (**77**)

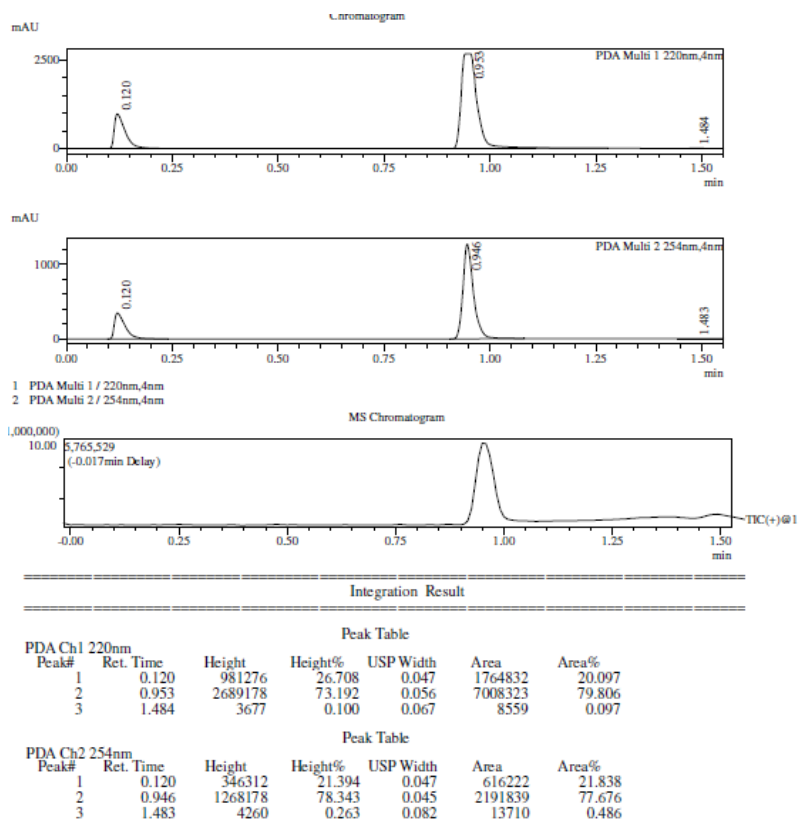

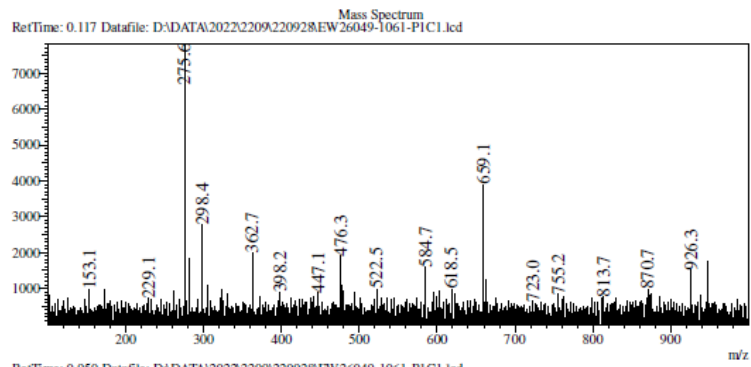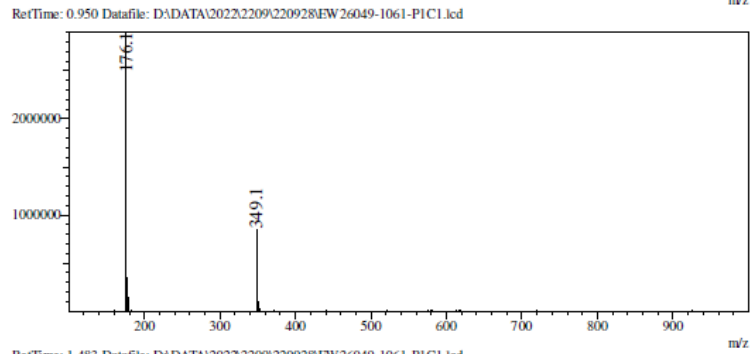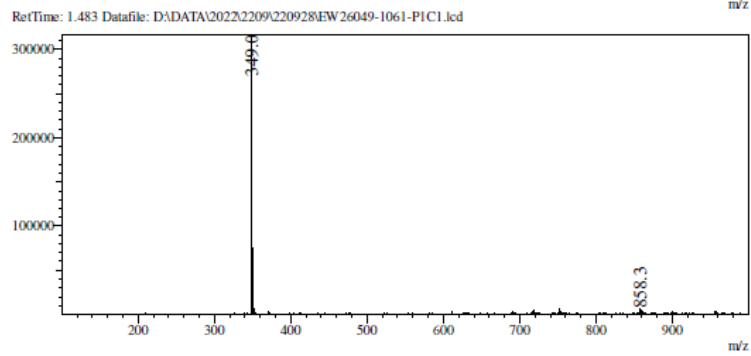

**<sup>1</sup>H NMR 8-[(4-methoxyphenyl)methylsulfanyl]imidazo[1,5-a]pyridine (79)**

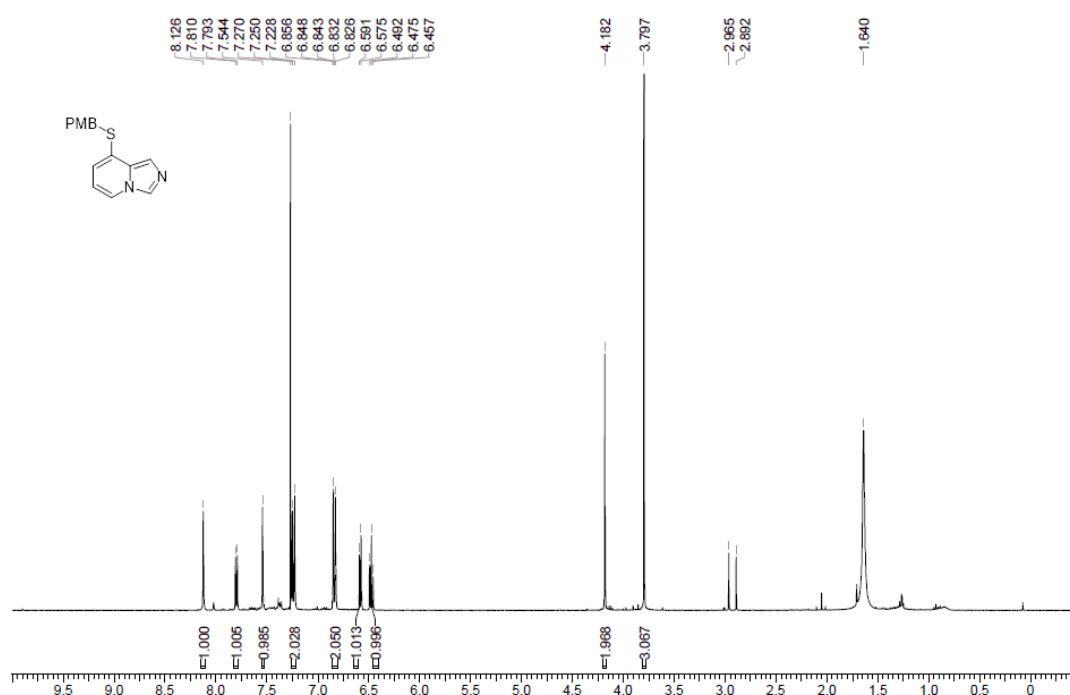

**LCMS 8-[(4-methoxyphenyl)methylsulfanyl]imidazo[1,5-a]pyridine (79)**

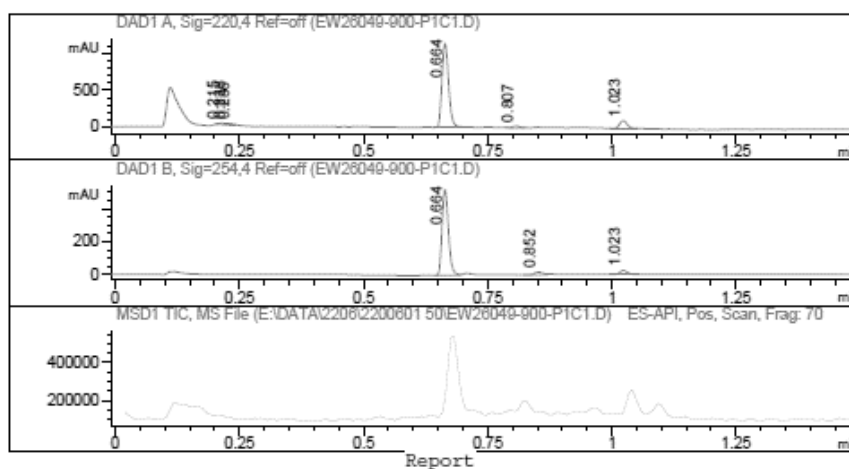

| Signal 1 : DAD1 A, Sig=220,4 Ref=off |            |          |       |          |        |
|--------------------------------------|------------|----------|-------|----------|--------|
| #                                    | Meas. Ret. | Height   | Width | Area     | Area % |
| 1                                    | 0.215      | 20.078   | 0.016 | 22.199   | 1.759  |
| 2                                    | 0.228      | 19.674   | 0.008 | 9.549    | 0.757  |
| 3                                    | 0.236      | 15.687   | 0.008 | 7.158    | 0.567  |
| 4                                    | 0.664      | 1152.937 | 0.014 | 1074.950 | 85.184 |
| 5                                    | 0.807      | 22.970   | 0.015 | 22.046   | 1.747  |
| 6                                    | 1.023      | 111.341  | 0.017 | 126.014  | 9.986  |

| Signal 2 : DAD1 B, Sig=254,4 Ref=off |            |         |       |         |        |
|--------------------------------------|------------|---------|-------|---------|--------|
| #                                    | Meas. Ret. | Height  | Width | Area    | Area % |
| 1                                    | 0.664      | 521.269 | 0.014 | 465.063 | 91.003 |
| 2                                    | 0.852      | 17.640  | 0.017 | 19.793  | 3.873  |
| 3                                    | 1.023      | 24.565  | 0.016 | 26.185  | 5.124  |

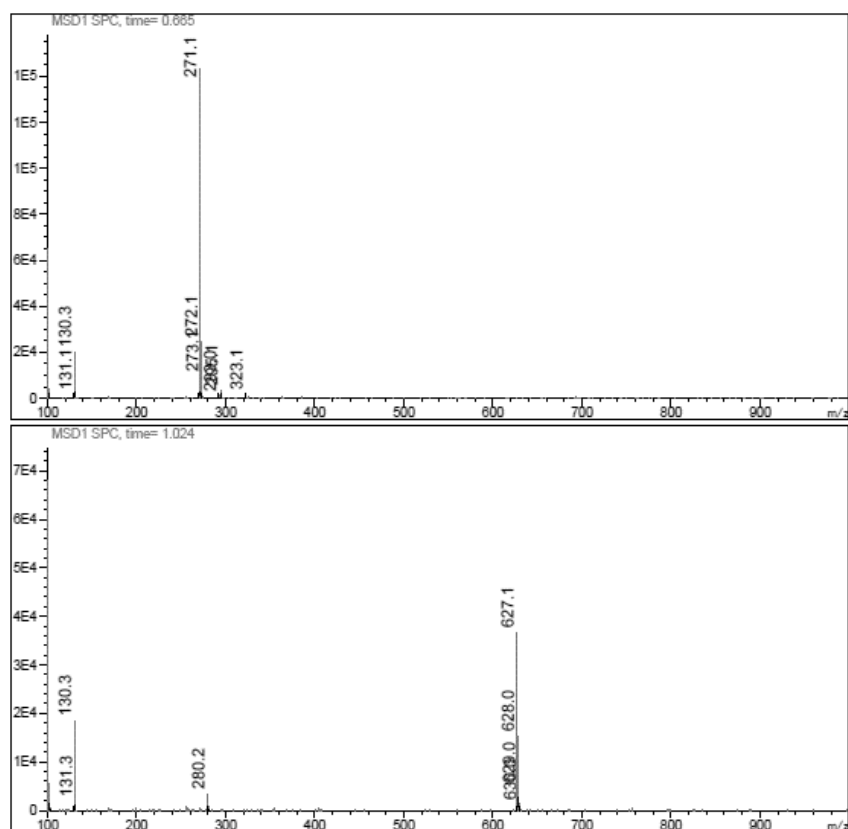

$^1\text{H}$  NMR Imidazo[1,5-a]pyridine-8-thiol (**80**)

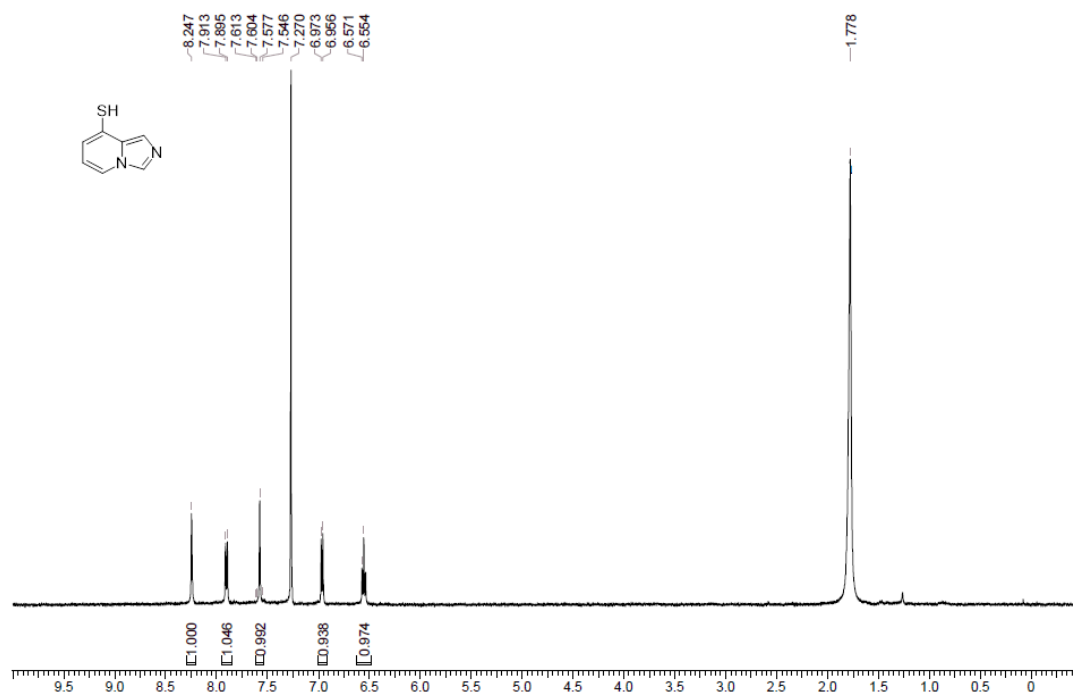

# <sup>1</sup>H NMR 7-Bromo-1-((2-(trimethylsilyl)ethoxy)methyl)-1H-indazole (82)

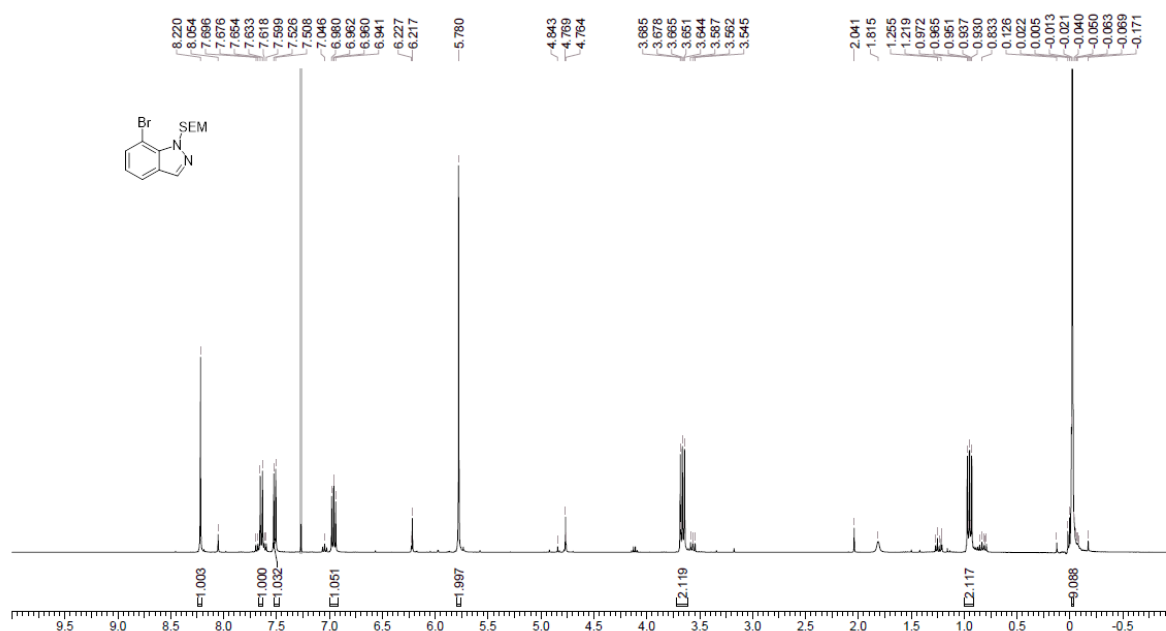

## LCMS 7-Bromo-1-((2-(trimethylsilyl)ethoxy)methyl)-1H-indazole (82)

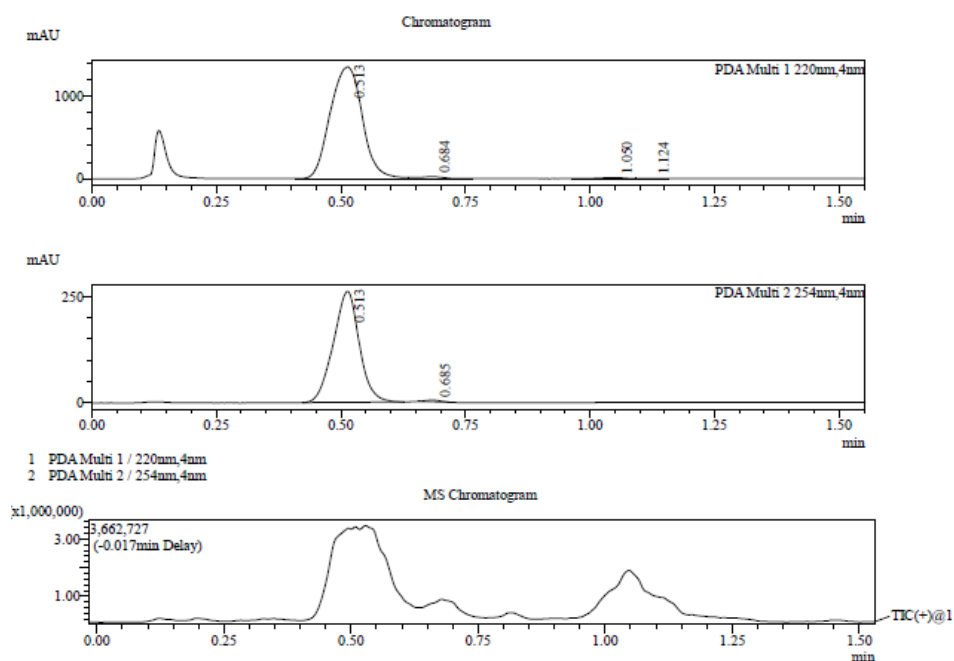

### Integration Result

| Peak Table |           |         |         |           |         |        |
|------------|-----------|---------|---------|-----------|---------|--------|
| Peak#      | Ret. Time | Height  | Height% | USP Width | Area    | Area%  |
| 1          | 0.513     | 1348759 | 97.208  | 0.114     | 6057321 | 97.814 |
| 2          | 0.684     | 22531   | 1.624   | 0.243     | 81431   | 1.315  |
| 3          | 1.050     | 12340   | 0.889   | 0.094     | 44505   | 0.719  |
| 4          | 1.124     | 3866    | 0.279   | 0.106     | 9442    | 0.152  |

| Peak Table |           |        |         |           |        |        |
|------------|-----------|--------|---------|-----------|--------|--------|
| Peak#      | Ret. Time | Height | Height% | USP Width | Area   | Area%  |
| 1          | 0.513     | 260850 | 98.559  | 0.097     | 949349 | 99.188 |
| 2          | 0.685     | 3814   | 1.441   | 0.059     | 7770   | 0.812  |

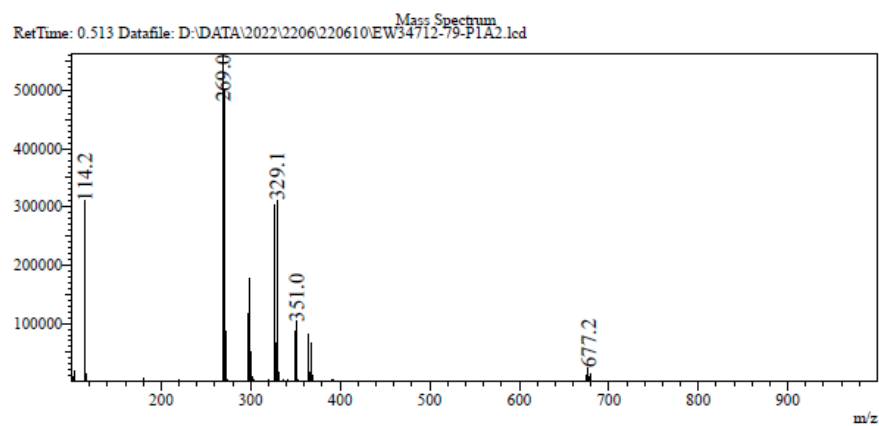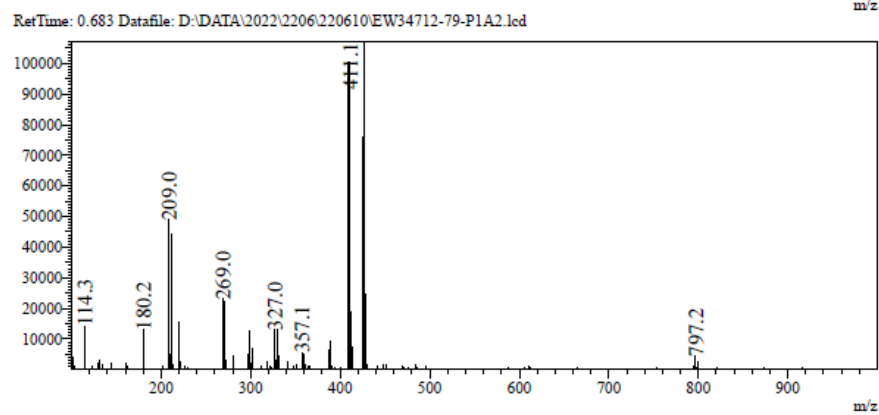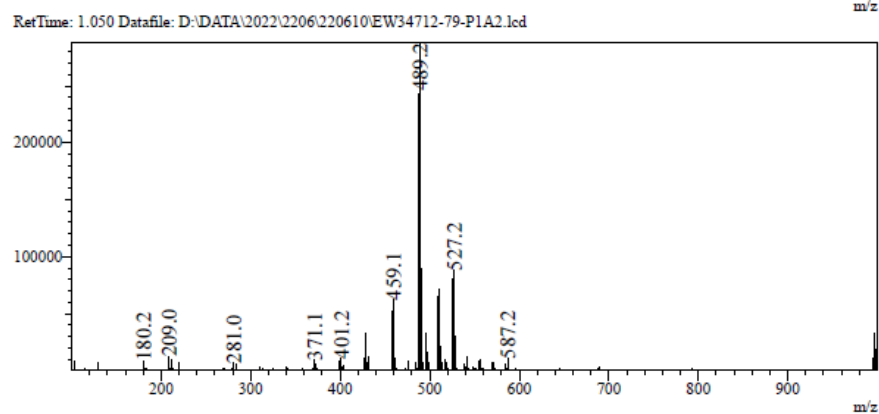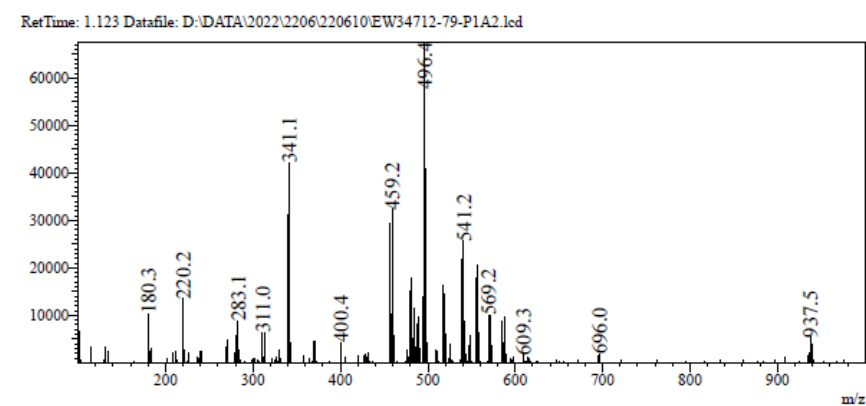

LCMS S7-((4-Methoxybenzyl)thio)-1H-indazole (**84**)

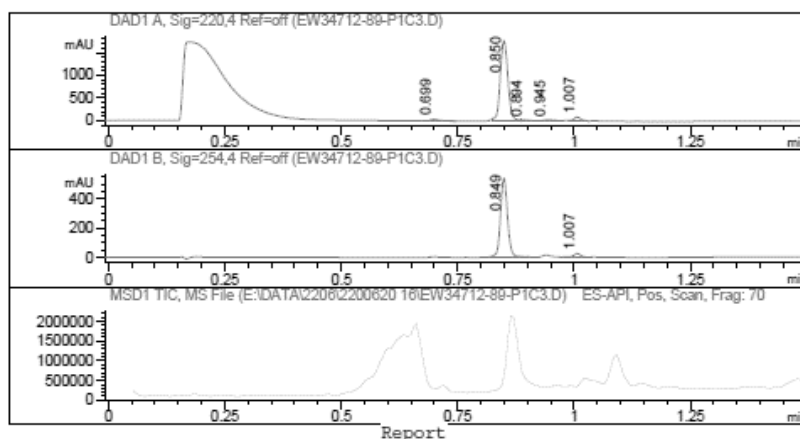

Signal 1 : DAD1 A, Sig=220,4 Ref=off

| # | Meas. | Ret.  | Height   | Width | Area     | Area % |
|---|-------|-------|----------|-------|----------|--------|
| 1 |       | 0.699 | 35.876   | 0.018 | 44.023   | 1.989  |
| 2 |       | 0.850 | 1777.898 | 0.018 | 2030.185 | 91.741 |
| 3 |       | 0.894 | 20.543   | 0.016 | 23.058   | 1.042  |
| 4 |       | 0.945 | 23.152   | 0.021 | 31.548   | 1.426  |
| 5 |       | 1.007 | 83.924   | 0.015 | 84.138   | 3.802  |

Signal 2 : DAD1 B, Sig=254,4 Ref=off

| # | Meas. | Ret.  | Height  | Width | Area    | Area % |
|---|-------|-------|---------|-------|---------|--------|
| 1 |       | 0.849 | 543.465 | 0.016 | 572.278 | 95.748 |
| 2 |       | 1.007 | 24.332  | 0.016 | 25.413  | 4.252  |

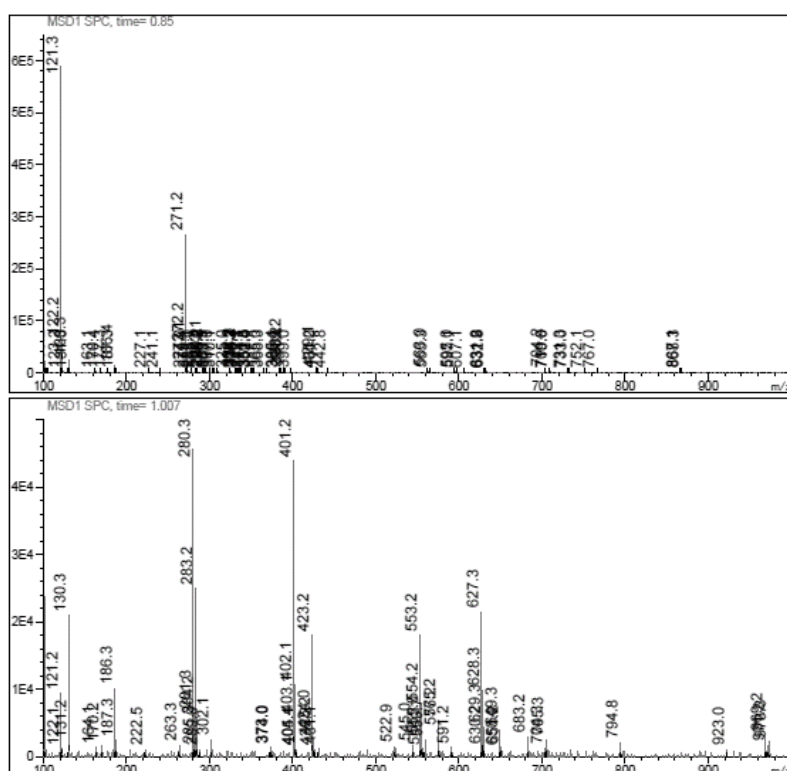



# <sup>1</sup>H NMR 1H-Indazole-7-thiol (85)

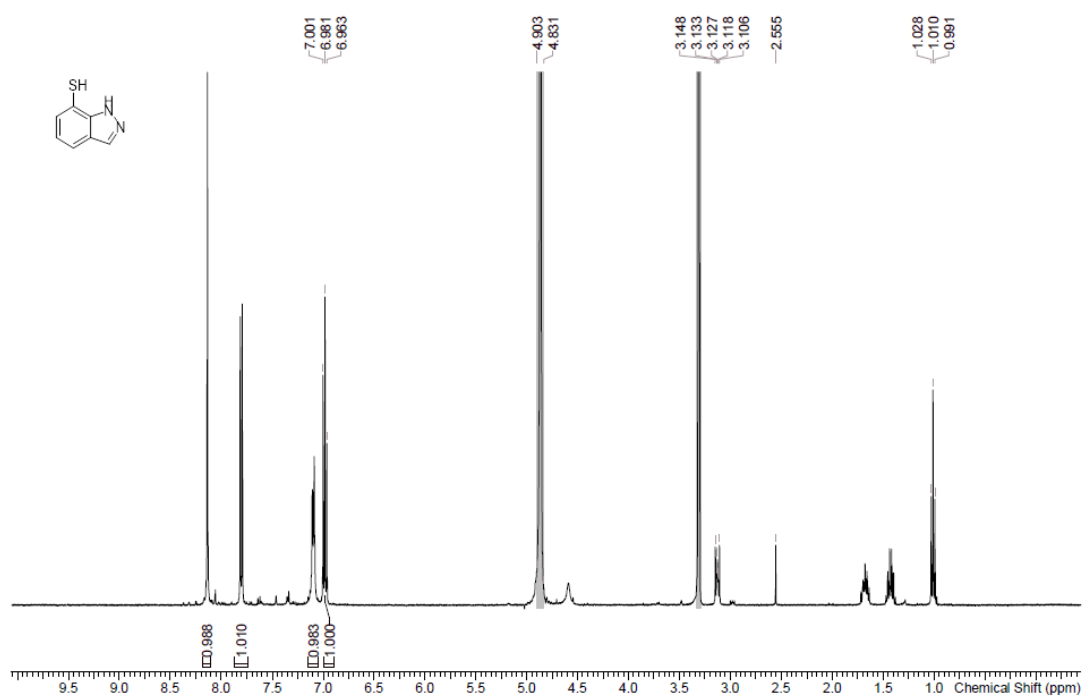

## LCMS 1H-Indazole-7-thiol (85)

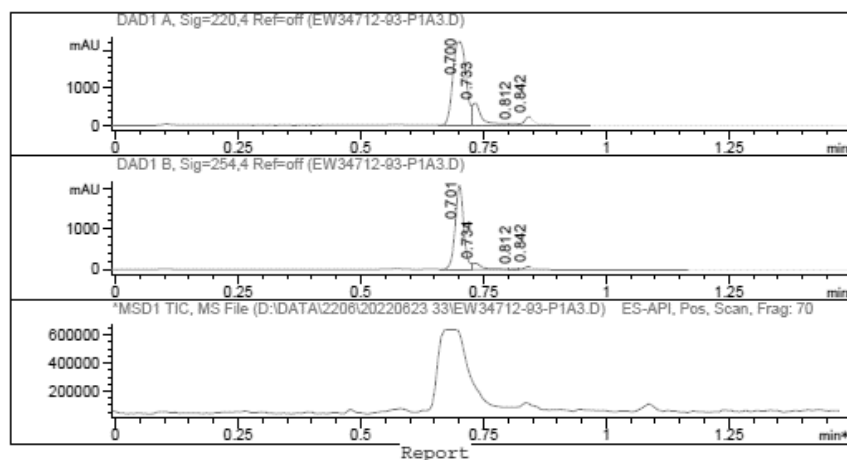

| Signal 1 : DAD1 A, Sig=220,4 Ref=off |       |          |        |          |        |        |
|--------------------------------------|-------|----------|--------|----------|--------|--------|
| #                                    | Meas. | Ret.     | Height | Width    | Area   | Area % |
| 1                                    | 0.700 | 2242.561 | 0.030  | 4175.400 | 76.974 |        |
| 2                                    | 0.733 | 594.393  | 0.020  | 825.402  | 15.216 |        |
| 3                                    | 0.812 | 51.604   | 0.016  | 57.294   | 1.056  |        |
| 4                                    | 0.842 | 230.986  | 0.022  | 366.334  | 6.753  |        |
| Signal 2 : DAD1 B, Sig=254,4 Ref=off |       |          |        |          |        |        |
| #                                    | Meas. | Ret.     | Height | Width    | Area   | Area % |
| 1                                    | 0.701 | 2089.253 | 0.019  | 2522.999 | 83.574 |        |
| 2                                    | 0.734 | 157.495  | 0.021  | 230.486  | 7.635  |        |
| 3                                    | 0.812 | 20.125   | 0.017  | 23.690   | 0.785  |        |
| 4                                    | 0.842 | 74.143   | 0.042  | 241.720  | 8.007  |        |

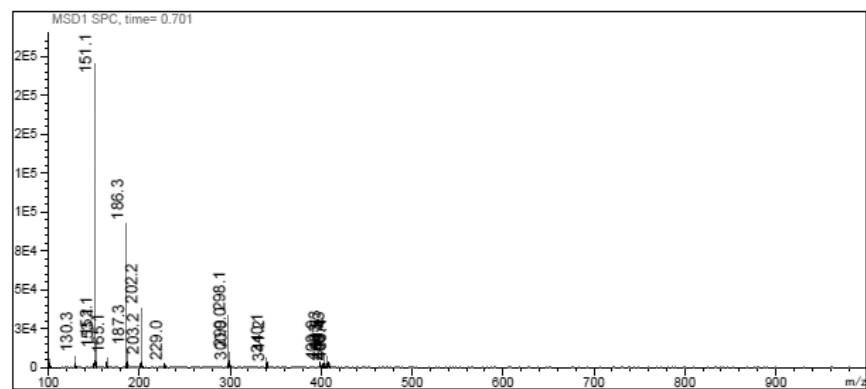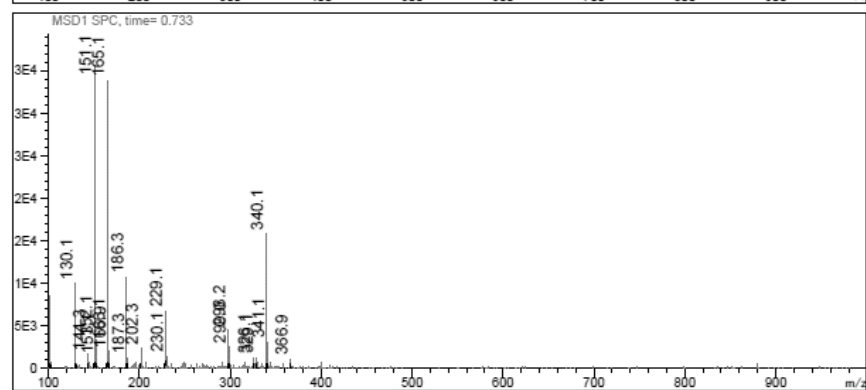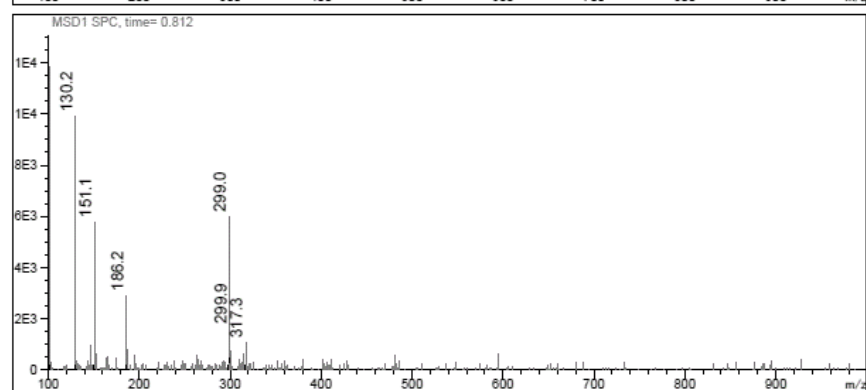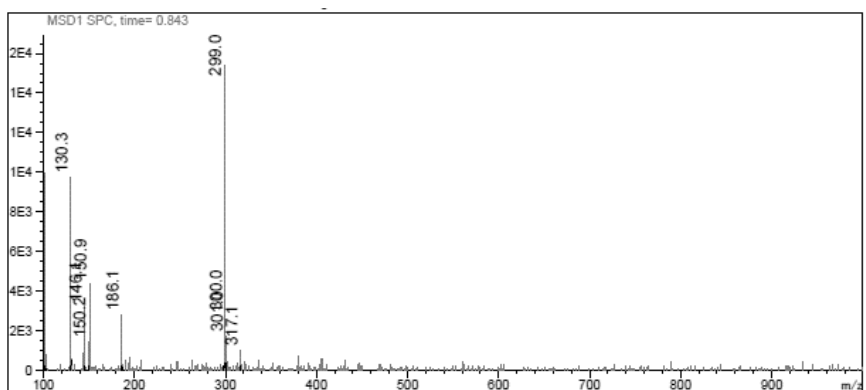

# <sup>1</sup>H NMR (4-Bromo-2-pyridyl)methanamine (**87**)

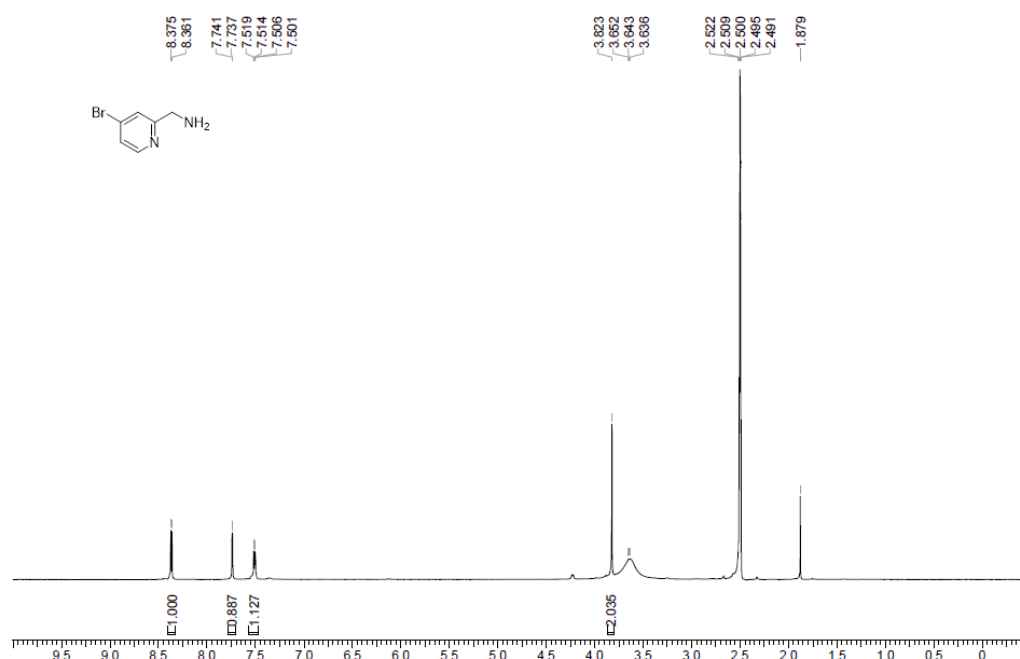

## LCMS (4-Bromo-2-pyridyl)methanamine (**87**)

Compound ID : 1  
 Sample ID : EW26049-913-P1C1  
 Injection Vol : 5ul  
 Location : vial64  
 Acq Method : D:\method\0-60CD\_R\_220&254\_POS.lcm  
 Org DataFile : D:\DATA\2022\2206\220614\EW26049-913-P1C1.k  
 Injection Date : 2022-06-14 18:01:25  
 Instrument : LCMS-O 15-105

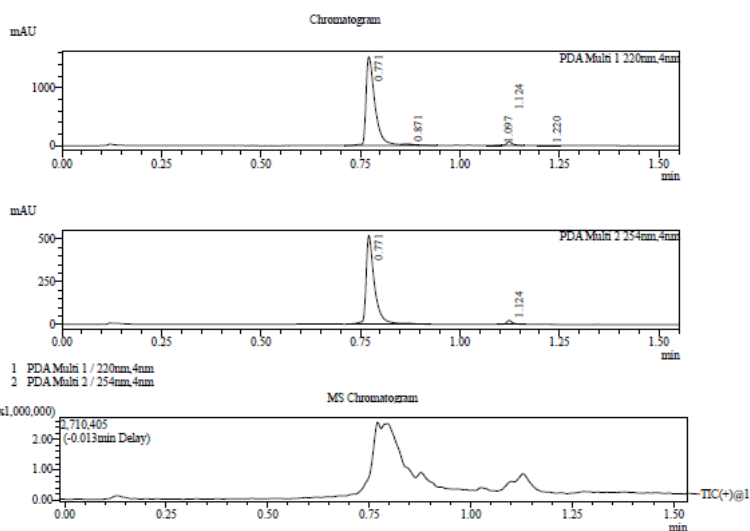

| Integration Result |           |         |         |           |         |        |
|--------------------|-----------|---------|---------|-----------|---------|--------|
| Peak Table         |           |         |         |           |         |        |
| Peak#              | Ret. Time | Height  | Height% | USP Width | Area    | Area%  |
| 1                  | 0.771     | 1532626 | 94.715  | 0.040     | 2414874 | 96.401 |
| 2                  | 0.871     | 9480    | 0.586   | 0.035     | 11159   | 0.445  |
| 3                  | 1.097     | 5905    | 0.365   | 0.067     | 7198    | 0.287  |
| 4                  | 1.124     | 66608   | 4.116   | 0.026     | 66713   | 2.663  |
| 5                  | 1.220     | 3524    | 0.218   | 0.040     | 5076    | 0.203  |
| Peak Table         |           |         |         |           |         |        |
| Peak#              | Ret. Time | Height  | Height% | USP Width | Area    | Area%  |
| 1                  | 0.771     | 518067  | 95.740  | 0.037     | 764959  | 97.058 |
| 2                  | 1.124     | 23054   | 4.260   | 0.026     | 23189   | 2.942  |

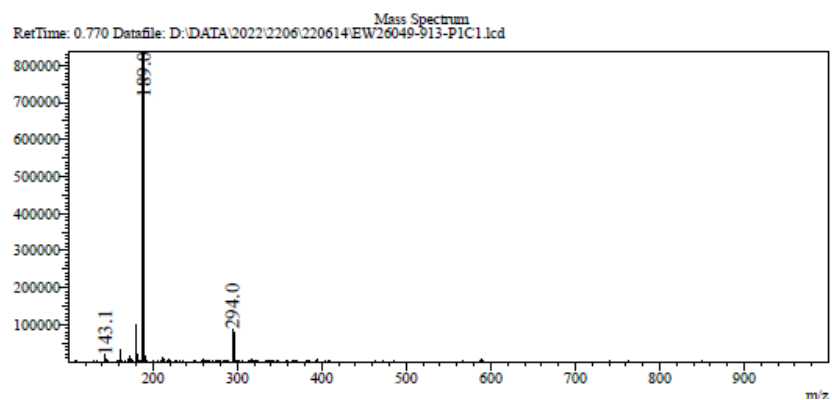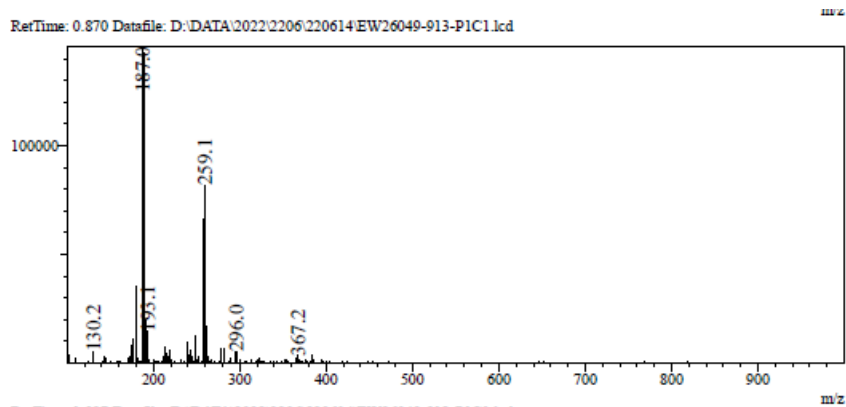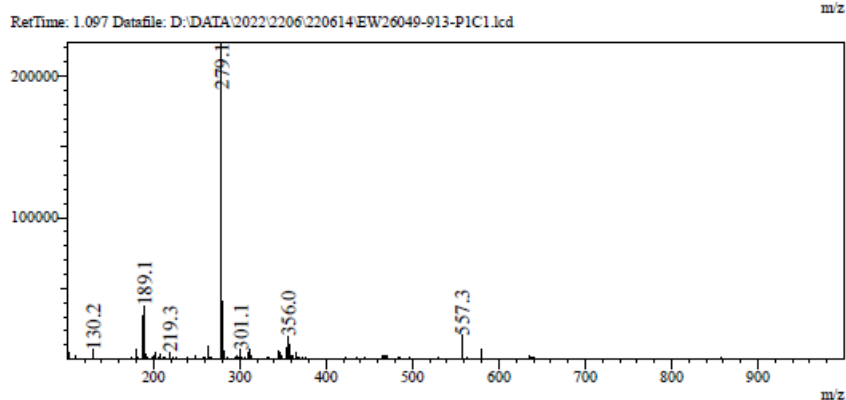

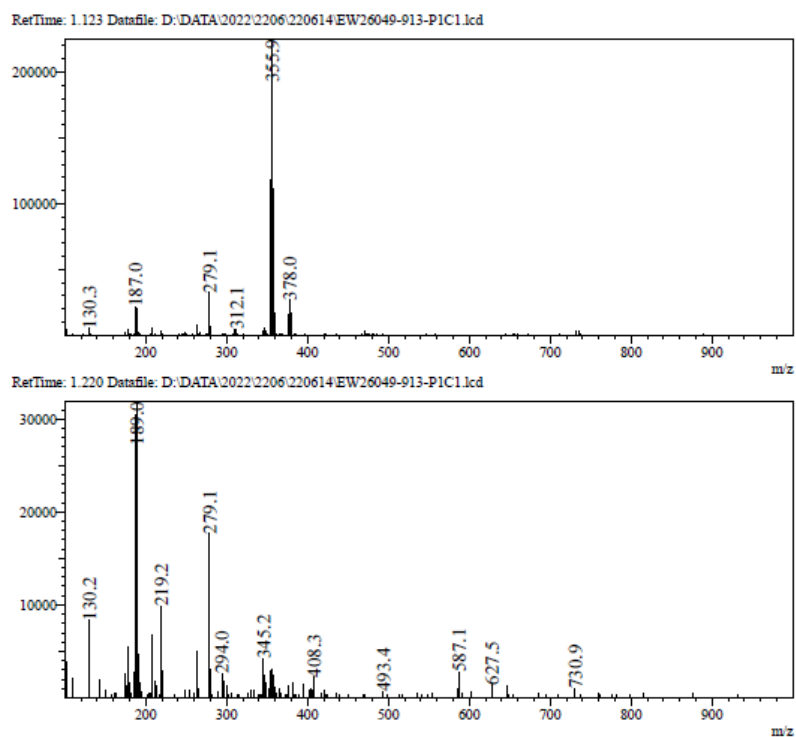

**$^1\text{H}$  NMR N-[(4-Bromo-2-pyridyl)methyl]formamide (**88**)**

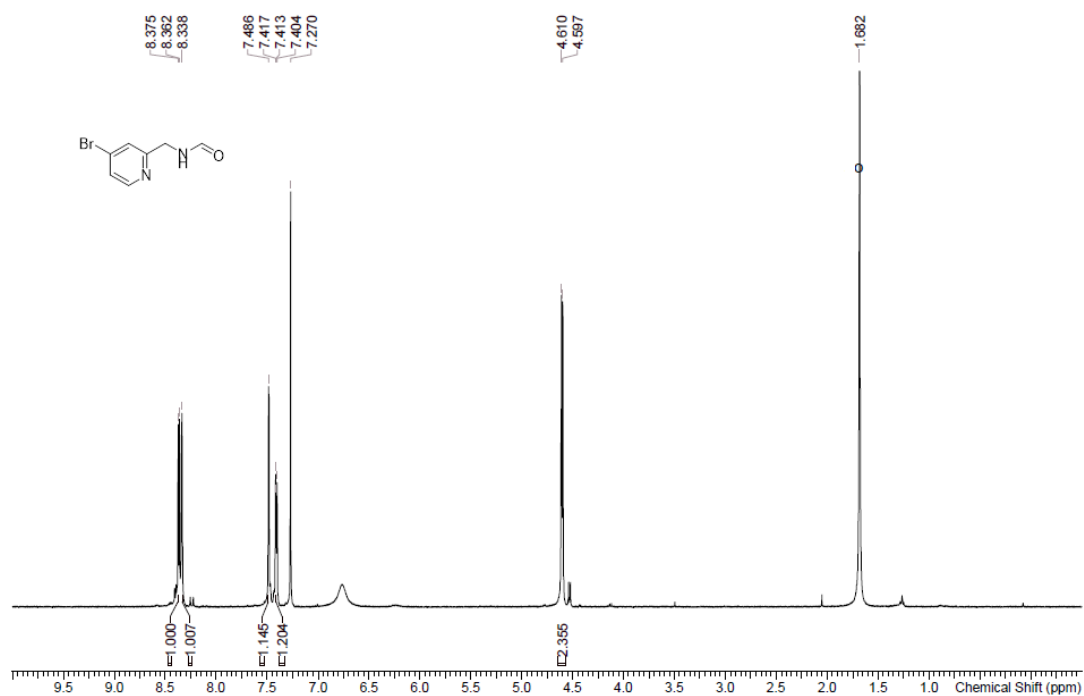

**<sup>1</sup>H NMR 7-Bromoimidazo[1,5-a]pyridine (89)**

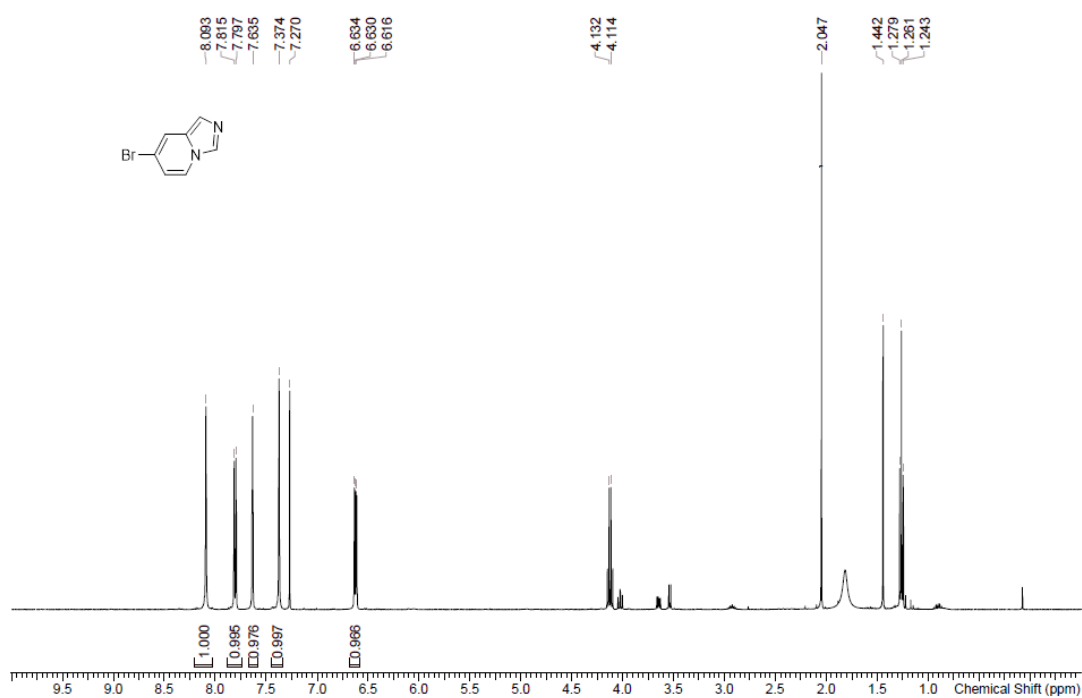

**<sup>1</sup>H NMR 7-[(4-Methoxyphenyl)methylsulfanyl]imidazo[1,5-a]pyridine (90)**

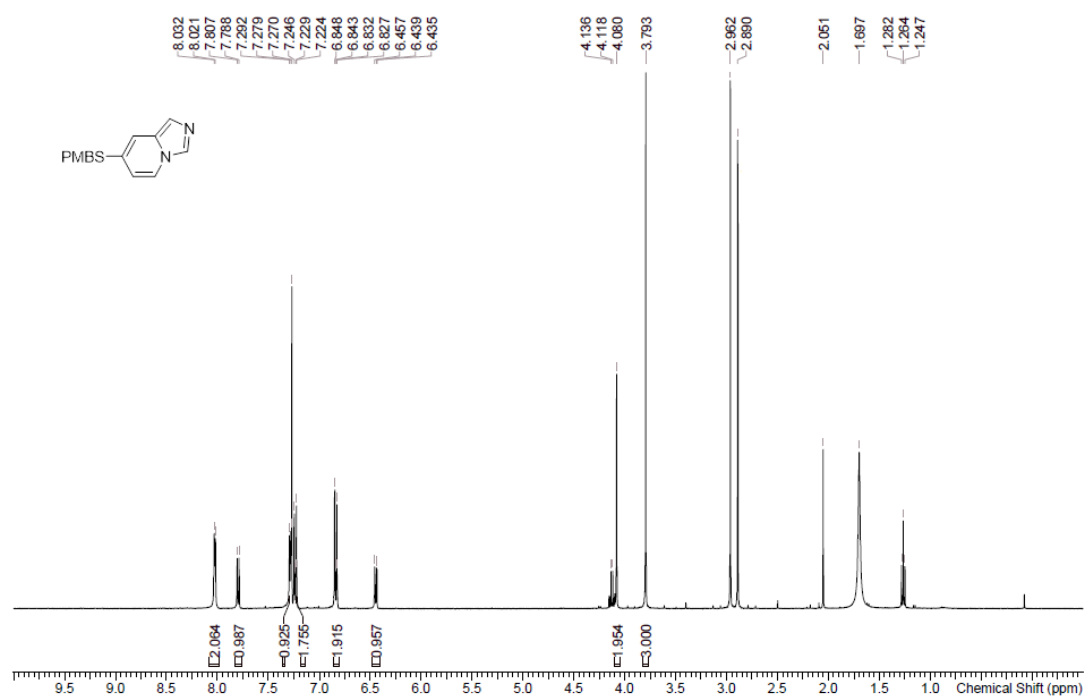

# LCMS 7-[(4-Methoxyphenyl)methylsulfanylimidazo[1,5-a]pyridine (90)

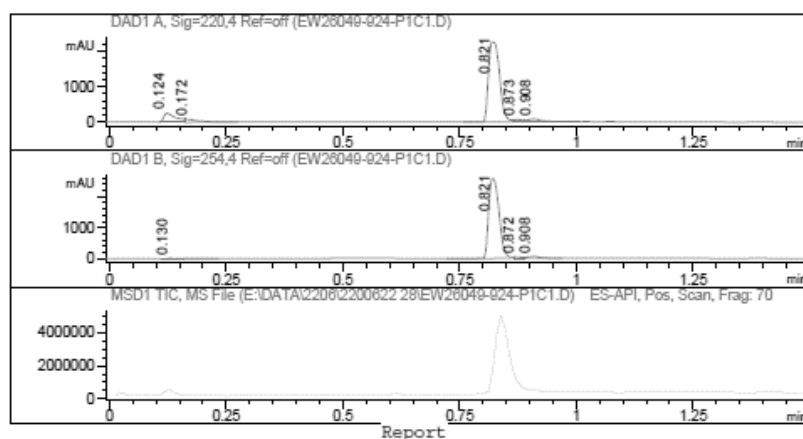

| Signal 1 : DAD1 A, Sig=220,4 Ref=off |            |          |       |          |        |  |
|--------------------------------------|------------|----------|-------|----------|--------|--|
| #                                    | Meas. Ret. | Height   | Width | Area     | Area % |  |
| 1                                    | 0.124      | 253.178  | 0.025 | 447.109  | 9.825  |  |
| 2                                    | 0.172      | 69.786   | 0.032 | 161.664  | 3.552  |  |
| 3                                    | 0.821      | 2268.042 | 0.027 | 3732.992 | 82.027 |  |
| 4                                    | 0.873      | 57.333   | 0.019 | 75.903   | 1.668  |  |
| 5                                    | 0.908      | 78.055   | 0.025 | 133.251  | 2.928  |  |
| Signal 2 : DAD1 B, Sig=254,4 Ref=off |            |          |       |          |        |  |
| #                                    | Meas. Ret. | Height   | Width | Area     | Area % |  |
| 1                                    | 0.130      | 16.372   | 0.045 | 56.535   | 1.344  |  |
| 2                                    | 0.821      | 2578.774 | 0.025 | 3990.766 | 94.887 |  |
| 3                                    | 0.872      | 44.519   | 0.018 | 53.897   | 1.281  |  |
| 4                                    | 0.908      | 55.745   | 0.027 | 104.626  | 2.488  |  |

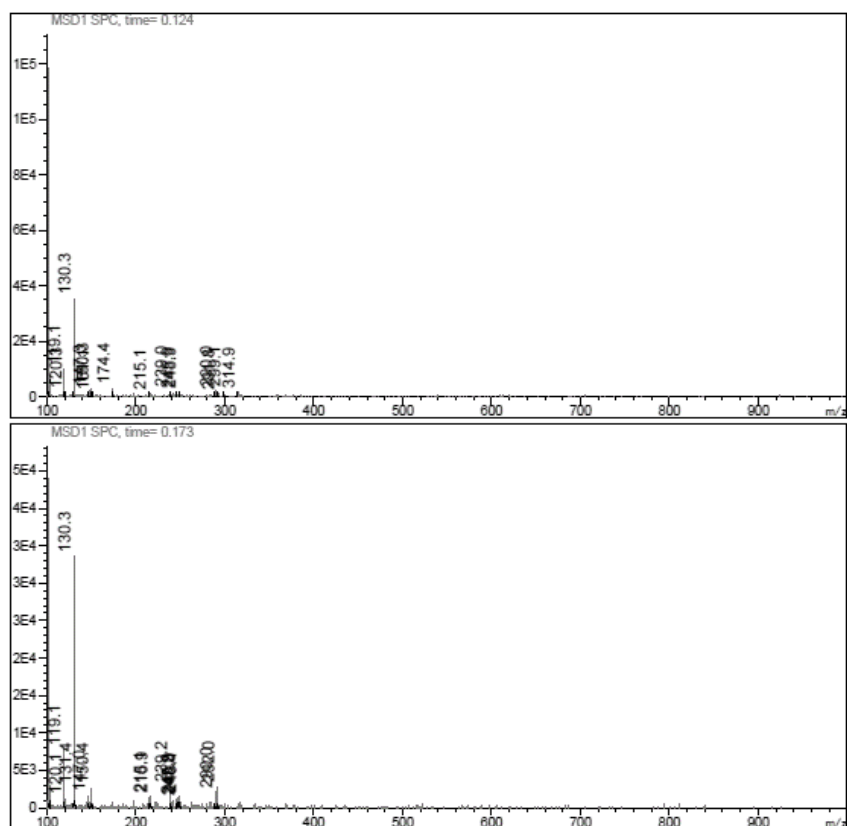

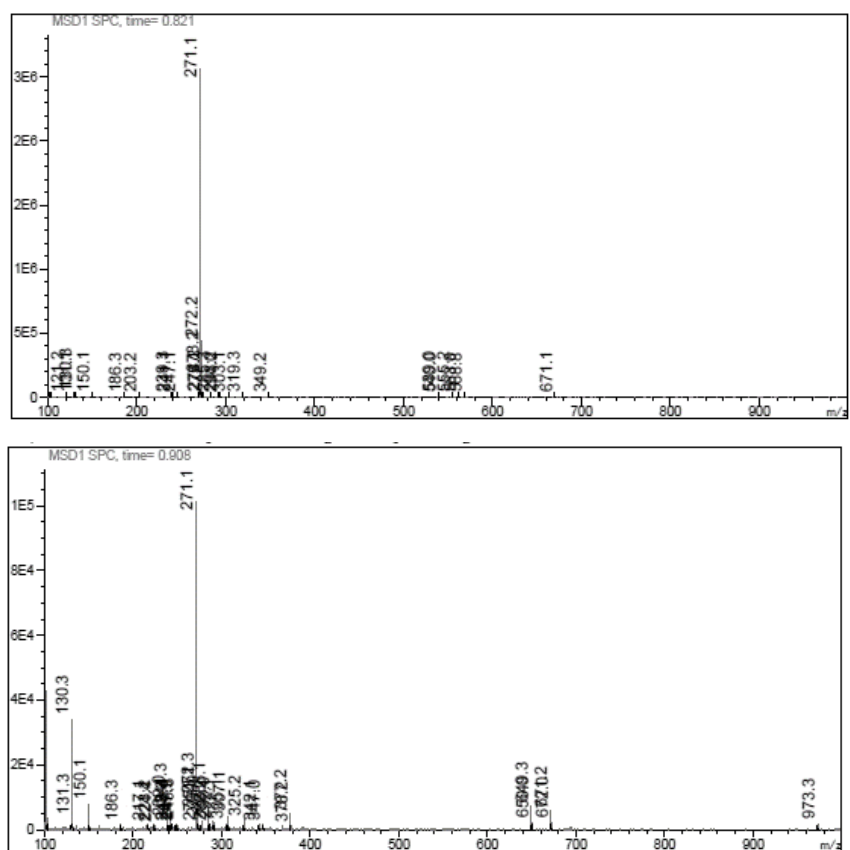

$^1\text{H}$  NMR Imidazo[1,5-a]pyridine-7-thiol (**91**)

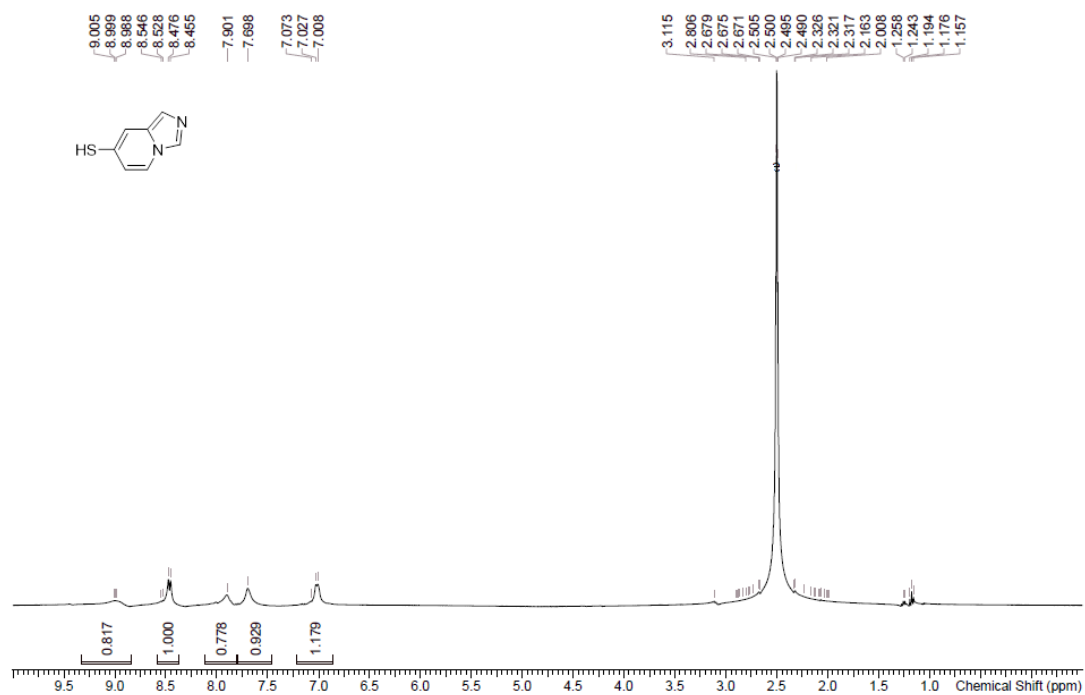



**<sup>1</sup>H NMR** 9-[(2*R*,3*R*,4*R*,5*S*)-5-(1,3-Benzothiazol-2-ylsulfanylmethyl)-3,4-bis[[tert-butyl(dimethyl)silyl]oxy]tetrahydrofuran-2-yl]-*N*-methyl-purin-6-amine (**93**)

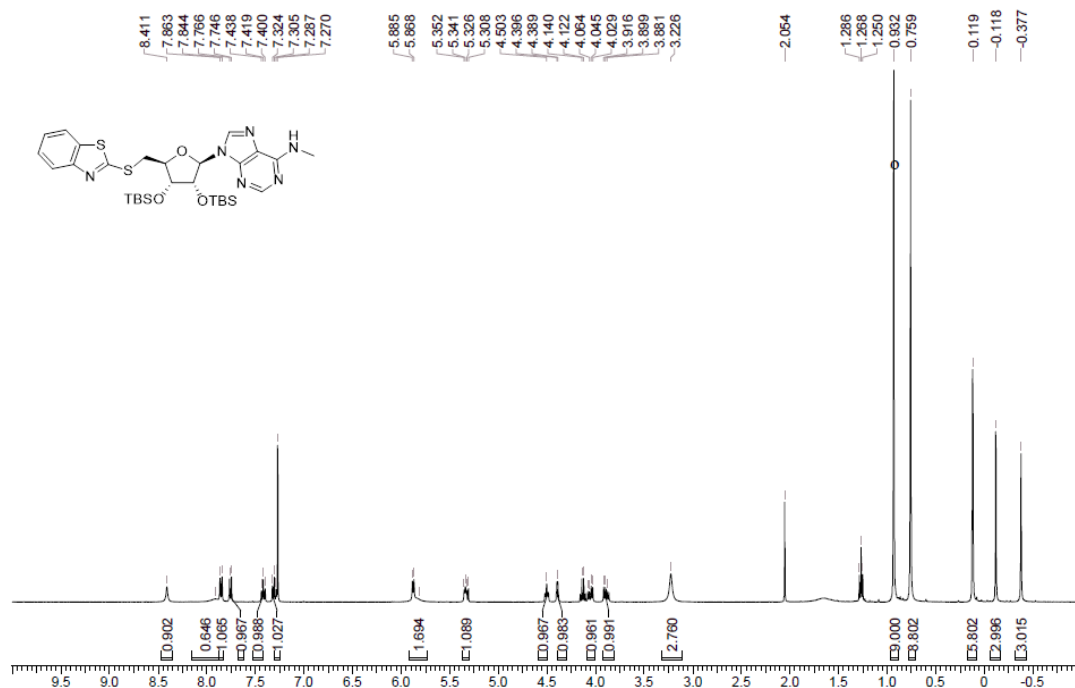

**LCMS** 9-[(2*R*,3*R*,4*R*,5*S*)-5-(1,3-Benzothiazol-2-ylsulfanylmethyl)-3,4-bis[[tert-butyl(dimethyl)silyl]oxy]tetrahydrofuran-2-yl]-*N*-methyl-purin-6-amine (**93**)

Compound ID : 1  
Sample ID : EW26049-722-P1S1  
Injection Vol : 5ul  
Location : vial84  
Acq Method : D:\method\50-100CD\_R\_220&254\_POS.lcm  
Org DataFile : D:\DATA\2022\2201\220121\EW26049-722-P1S1.lc  
Injection Date : 2022-01-21 19:30:41  
Instrument : LCMS-W

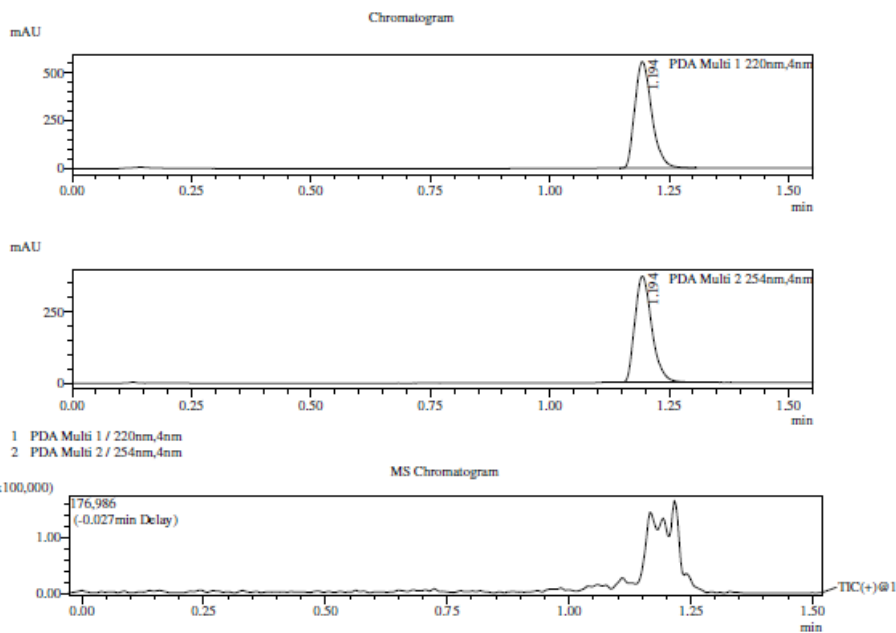

#### Integration Result

##### Peak Table

| Peak# | Ret. Time | Height | Height% | USP Width | Area    | Area%   |
|-------|-----------|--------|---------|-----------|---------|---------|
| 1     | 1.194     | 555080 | 100.000 | 0.065     | 1369531 | 100.000 |

##### Peak Table

| Peak# | Ret. Time | Height | Height% | USP Width | Area   | Area%   |
|-------|-----------|--------|---------|-----------|--------|---------|
| 1     | 1.194     | 372151 | 100.000 | 0.065     | 919959 | 100.000 |

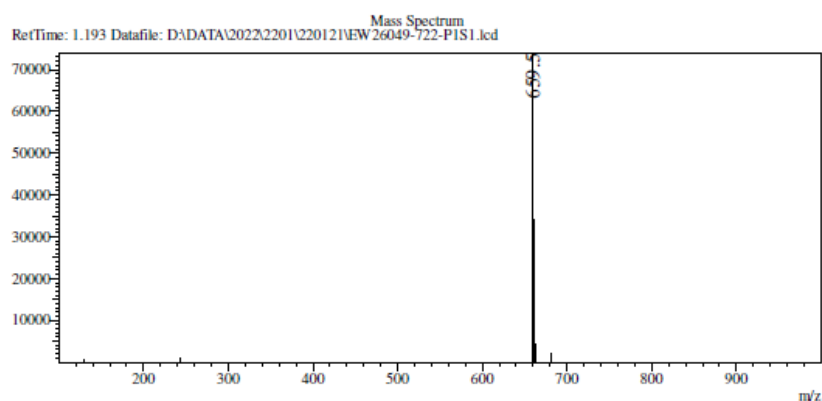

<sup>1</sup>H NMR 9-[(2*R*,3*R*,4*R*,5*S*)-5-(1,3-Benzothiazol-2-ylsulfanylmethyl)-3,4-bis[[tert-butyl(dimethyl)

silyl]oxy]tetrahydrofuran-2-yl]-*N,N*-dimethyl-purin-6-amine (**94**)

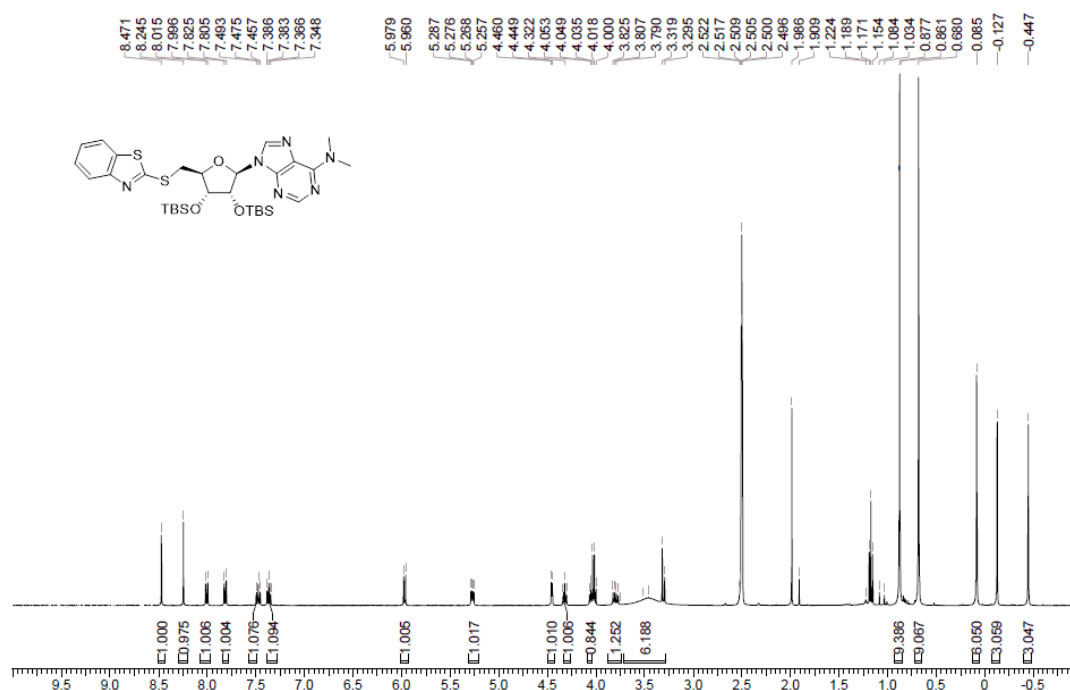

LCMS 9-[(2*R*,3*R*,4*R*,5*S*)-5-(1,3-Benzothiazol-2-ylsulfanylmethyl)-3,4-bis[[*tert*-butyl(dimethyl)silyl]oxy]tetrahydrofuran-2-yl]-*N,N*-dimethyl-purin-6-amine (**94**)

Compound ID : 1  
Sample ID : EW26049-754-P1C1  
Injection Vol : 5ul  
Location : vial61  
Acq Method : D:\Method\50-100AB\_R\_220&254.lcm  
Org DataFile : D:\DATA\2022\220222\EW26049-754-P1C1.lc  
Injection Date : 2022-02-22 19:29:53  
Instrument : LCMS-AA 15-105

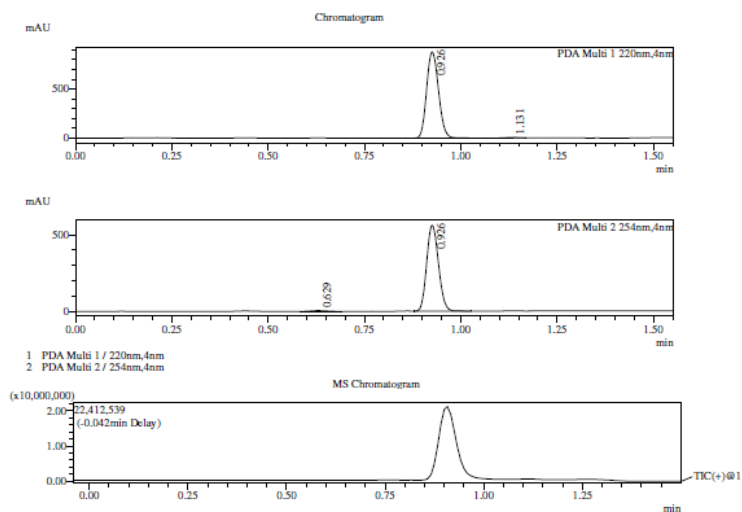

| Integration Result |       |           |        |         |           |         |
|--------------------|-------|-----------|--------|---------|-----------|---------|
| Peak Table         |       |           |        |         |           |         |
| PDA Ch1 220nm      | Peak# | Ret. Time | Height | Height% | USP Width | Area    |
|                    | 1     | 0.926     | 879108 | 99.321  | 0.058     | 1890220 |
|                    | 2     | 1.131     | 6012   | 0.679   | 0.057     | 12402   |
|                    |       |           |        |         |           | Area%   |
|                    |       |           |        |         |           | 99.348  |
|                    |       |           |        |         |           | 0.652   |
| Peak Table         |       |           |        |         |           |         |
| PDA Ch2 254nm      | Peak# | Ret. Time | Height | Height% | USP Width | Area    |
|                    | 1     | 0.629     | 5654   | 0.998   | 0.085     | 17247   |
|                    | 2     | 0.926     | 560908 | 99.002  | 0.057     | 1196730 |
|                    |       |           |        |         |           | Area%   |
|                    |       |           |        |         |           | 1.421   |
|                    |       |           |        |         |           | 98.579  |

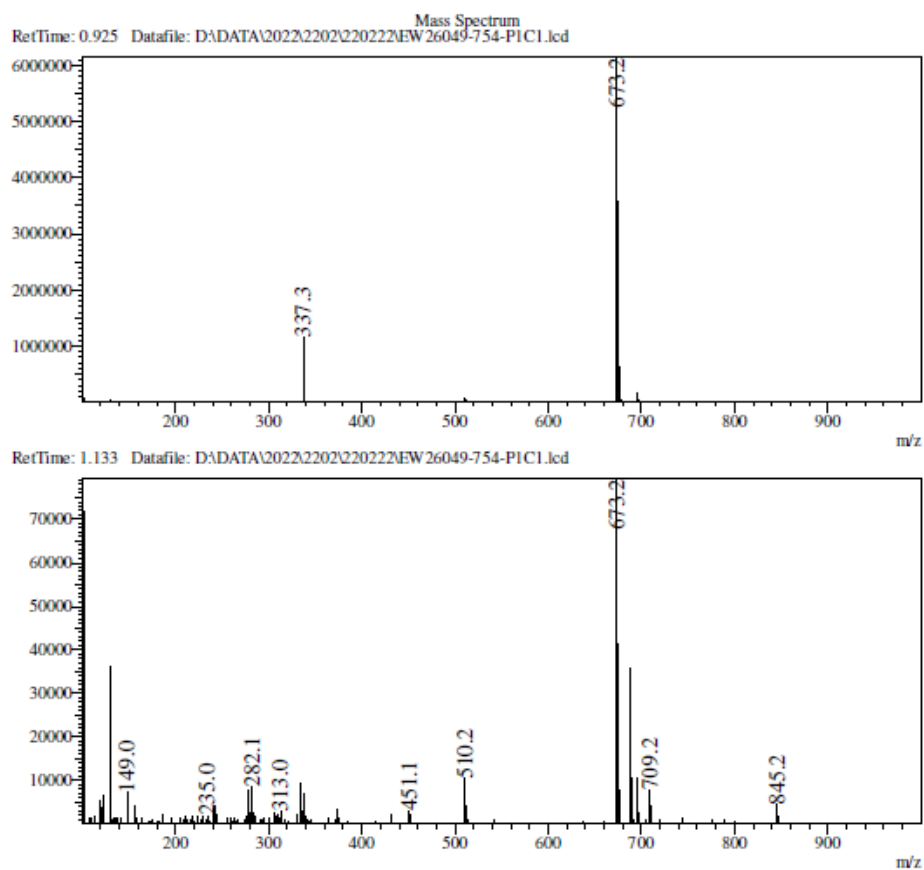

$^1\text{H}$  NMR (2*S*,3*S*,4*R*,5*R*)-2-(1,3-Benzothiazol-2-ylsulfanylmethyl)-5-[6-(methylamino)purin-9-yl]tetrahydrofuran-3,4-diol (**18**)

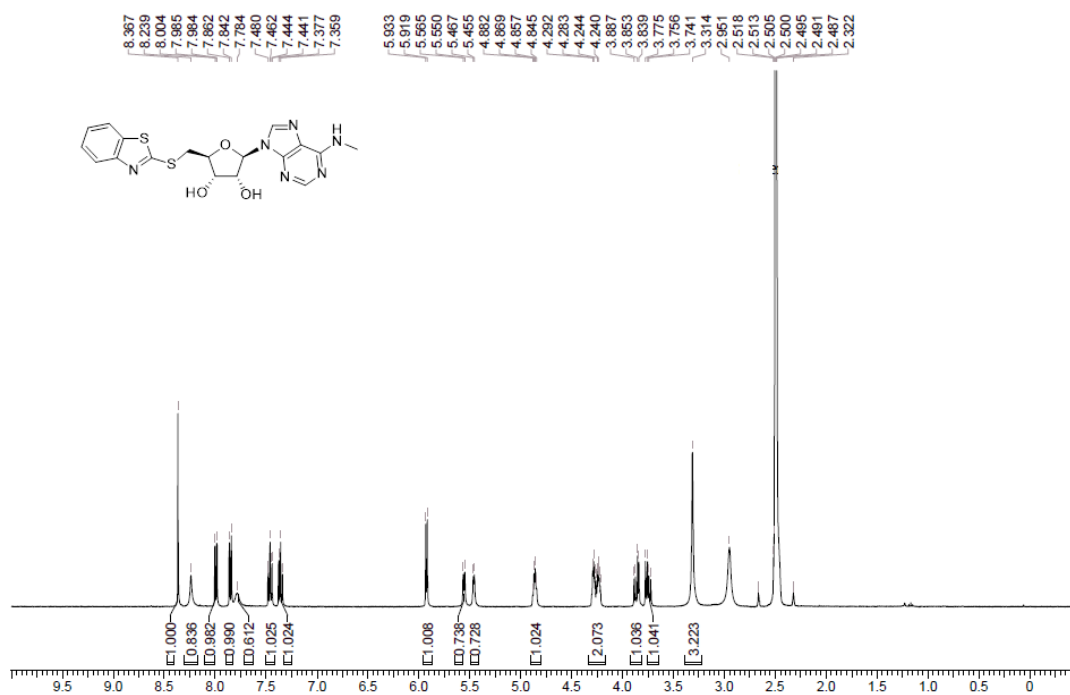

**HPLC (2*S*,3*S*,4*R*,5*R*)-2-(1,3-Benzothiazol-2-ylsulfanylmethyl)-5-[6-(methylamino)purin-9-yl]tetrahydrofuran-3,4-diol (**18**)**

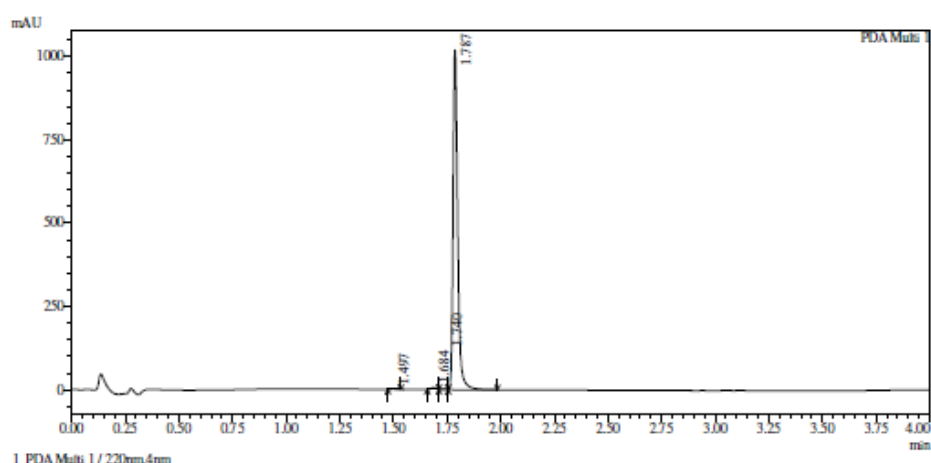

Integration result

| PeakTable     |           |           |            |         |         |         |
|---------------|-----------|-----------|------------|---------|---------|---------|
| PDA Ch1 220nm |           |           |            |         |         |         |
| Peak#         | Ret. Time | USP Width | Resolution | Height  | Area    | Area %  |
| 1             | 1.497     | 0.043     | 0.000      | 926     | 1468    | 0.095   |
| 2             | 1.684     | 0.039     | 4.558      | 5830    | 8404    | 0.541   |
| 3             | 1.740     | 0.104     | 0.779      | 2140    | 4374    | 0.282   |
| 4             | 1.787     | 0.039     | 0.651      | 1020359 | 1538690 | 99.083  |
| Total         |           |           |            | 1029255 | 1552936 | 100.000 |

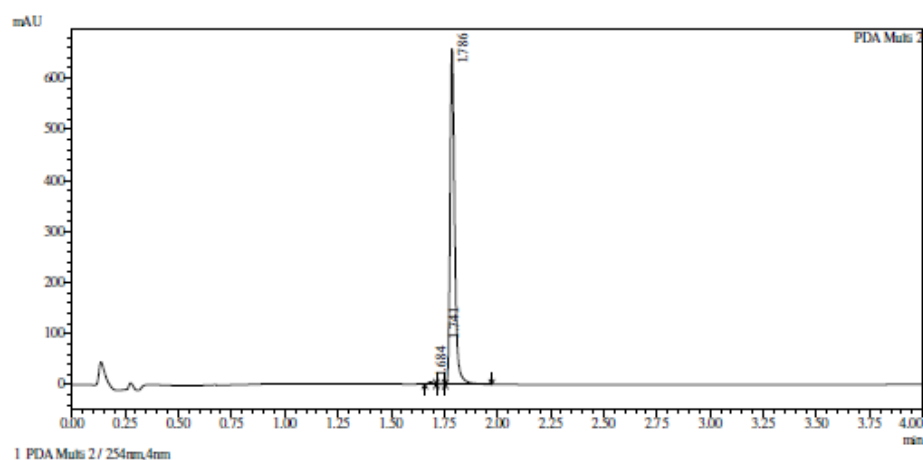

Integration result

| PeakTable     |           |           |            |        |        |         |
|---------------|-----------|-----------|------------|--------|--------|---------|
| PDA Ch2 254nm |           |           |            |        |        |         |
| Peak#         | Ret. Time | USP Width | Resolution | Height | Area   | Area %  |
| 1             | 1.684     | 0.039     | 0.000      | 4448   | 6454   | 0.647   |
| 2             | 1.741     | 0.109     | 0.764      | 1359   | 2765   | 0.277   |
| 3             | 1.786     | 0.039     | 0.617      | 656410 | 988544 | 99.076  |
| Total         |           |           |            | 662217 | 997762 | 100.000 |

**HRMS (2S,3S,4R,5R)-2-(1,3-Benzothiazol-2-ylsulfanylmethyl)-5-[6-(methylamino)purin-9-yl]tetrahydrofuran-3,4-diol (**18**)**

Compound Table

| Label                          | Tgt Score | Mass Error (ppm) | Tgt Formula      | Obs. RT | Ref. Mass | Obs. Mass |
|--------------------------------|-----------|------------------|------------------|---------|-----------|-----------|
| Cpd 1: C18 H18 N6 O3 S2; 1.710 | 98.27     | 2.08             | C18 H18 N6 O3 S2 | 1.71    | 430.0882  | 430.0891  |

| Obs. m/z | Obs. RT | Obs. Mass | Tgt Formula      | Tgt Mass | Tgt Mass Error (ppm) | Find Cpd Algorithm |
|----------|---------|-----------|------------------|----------|----------------------|--------------------|
| 216.0514 | 1.71    | 430.0891  | C18 H18 N6 O3 S2 | 430.0882 | 2.08                 | Find by Formula    |

Compound Chromatograms

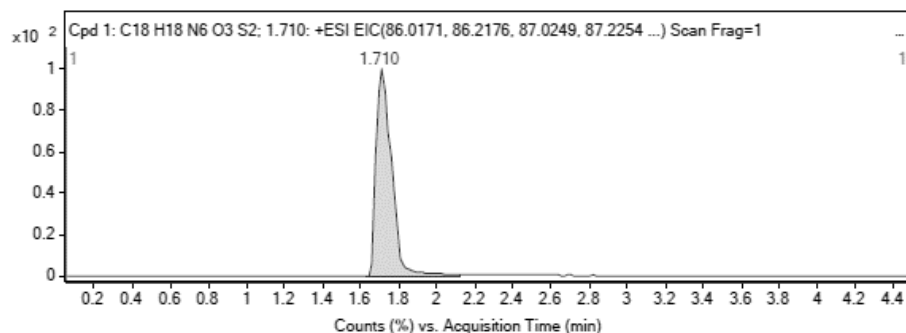

MS Zoomed Spectrum

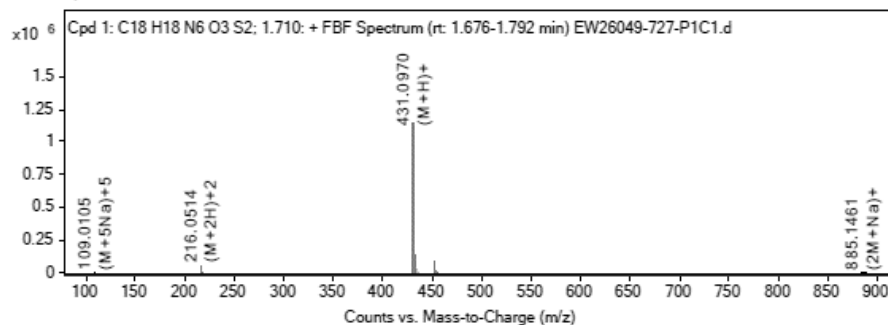

MS Spectrum Peak List

| Obs. m/z | Charge | Abund    | Ion/Isotope |
|----------|--------|----------|-------------|
| 216.0514 | 2      | 57524.63 | (M+2H)+2    |
| 216.5526 | 2      | 13759.6  | (M+2H)+2    |

|          |   |           |          |
|----------|---|-----------|----------|
| 217.0505 | 2 | 7395.06   | (M+2H)+2 |
| 431.097  | 1 | 113233.75 | (M+H)+   |
| 432.0982 | 1 | 283200.53 | (M+H)+   |
| 433.0938 | 1 | 136242.98 | (M+H)+   |
| 453.0772 | 1 | 94407.89  | (M+Na)+  |
| 454.0789 | 1 | 21746.32  | (M+Na)+  |
| 455.0751 | 1 | 11364.44  | (M+Na)+  |
| 885.1461 | 1 | 3790.71   | (2M+Na)+ |

MS Zoomed Spectrum

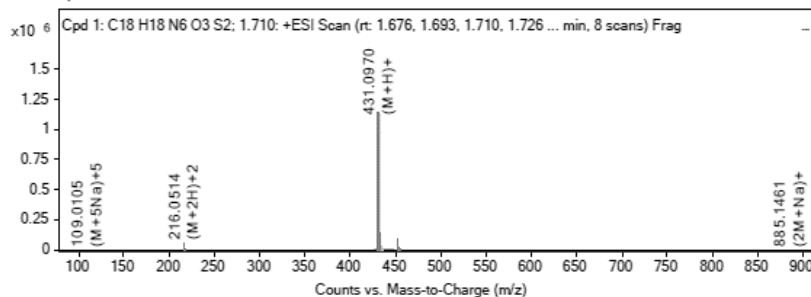

MS Spectrum Peak List

| Obs. m/z | Charge | Abund     | Ion/Isotope | Tgt Mass Error (ppm) |
|----------|--------|-----------|-------------|----------------------|
| 216.0514 | 2      | 57524.63  | (M+2H)+2    | -0.26                |
| 216.5526 | 2      | 13759.6   | (M+2H)+2    | 0.28                 |
| 217.0505 | 2      | 7395.06   | (M+2H)+2    | -0.19                |
| 431.097  | 1      | 113233.75 | (M+H)+      | -3.48                |
| 432.0982 | 1      | 283200.53 | (M+H)+      | -0.41                |
| 433.0938 | 1      | 136242.98 | (M+H)+      | -0.35                |
| 453.0772 | 1      | 94407.89  | (M+Na)+     | 0.51                 |
| 454.0789 | 1      | 21746.32  | (M+Na)+     | 2.23                 |
| 455.0751 | 1      | 11364.44  | (M+Na)+     | 1.23                 |
| 885.1461 | 1      | 3790.71   | (2M+Na)+    | 21.47                |

--- End Of Report ---

**<sup>1</sup>H NMR** (2*R*,3*R*,4*S*,5*S*)-2-(6-Aminopurin-9-yl)-5-(1,3-benzothiazol-2-ylsulfanylmethyl) tetrahydrofuran-3,4-diol (**19**)

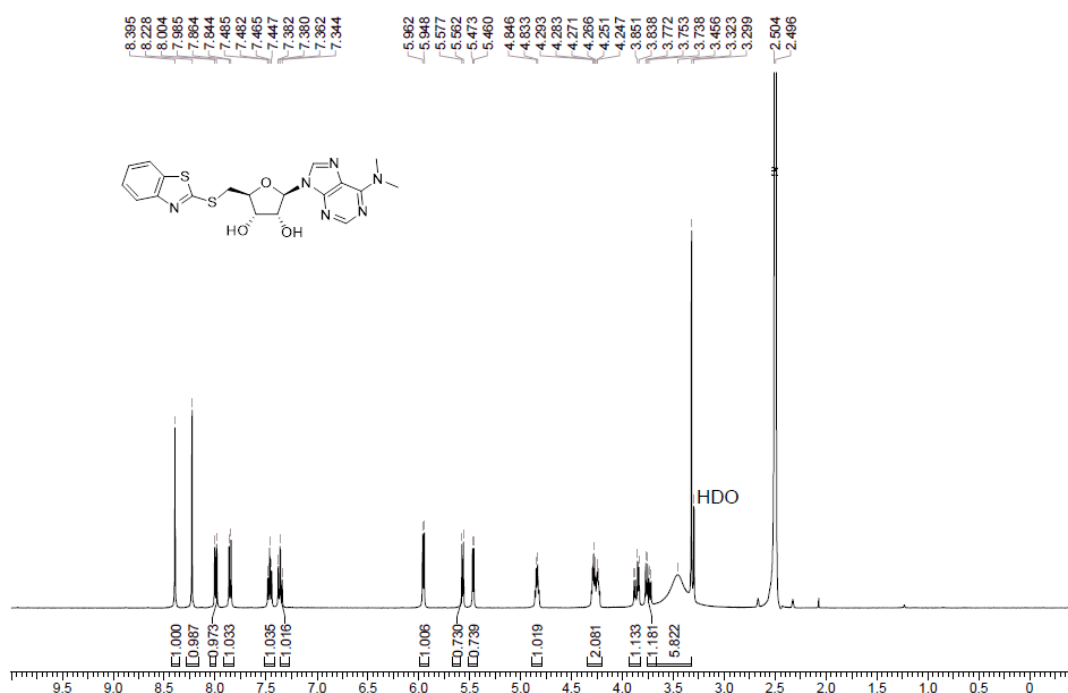

**HPLC** (2*R*,3*R*,4*S*,5*S*)-2-(6-Aminopurin-9-yl)-5-(1,3-benzothiazol-2-ylsulfanylmethyl) tetrahydrofuran-3,4-diol (**19**)

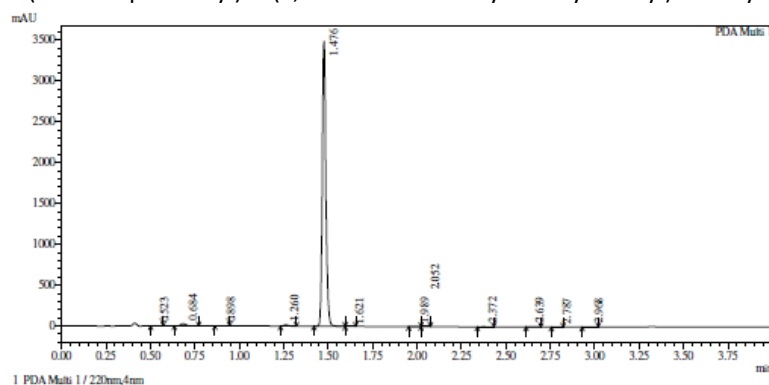

Integration result

| PeakTable |           |           |            |         |         |         |
|-----------|-----------|-----------|------------|---------|---------|---------|
| Peak#     | Ret. Time | USP Width | Resolution | Height  | Area    | Area %  |
| 1         | 0.523     | 0.045     | 0.000      | 2666    | 4485    | 0.090   |
| 2         | 0.684     | 0.056     | 3.175      | 26727   | 56430   | 1.133   |
| 3         | 0.898     | 0.067     | 3.500      | 1261    | 3054    | 0.061   |
| 4         | 1.260     | 0.042     | 6.707      | 14542   | 22571   | 0.453   |
| 5         | 1.476     | 0.035     | 5.636      | 3490065 | 4874839 | 97.901  |
| 6         | 1.621     | 0.043     | 3.685      | 1262    | 1941    | 0.039   |
| 7         | 1.989     | 0.048     | 8.087      | 1557    | 2687    | 0.054   |
| 8         | 2.052     | 0.046     | 1.353      | 880     | 1408    | 0.028   |
| 9         | 2.372     | 0.080     | 5.084      | 1178    | 3370    | 0.068   |
| 10        | 2.639     | 0.069     | 3.604      | 653     | 1759    | 0.035   |
| 11        | 2.787     | 0.051     | 2.479      | 942     | 1788    | 0.036   |
| 12        | 2.968     | 0.063     | 3.170      | 2024    | 5009    | 0.101   |
| Total     |           |           |            | 3543758 | 4979342 | 100.000 |

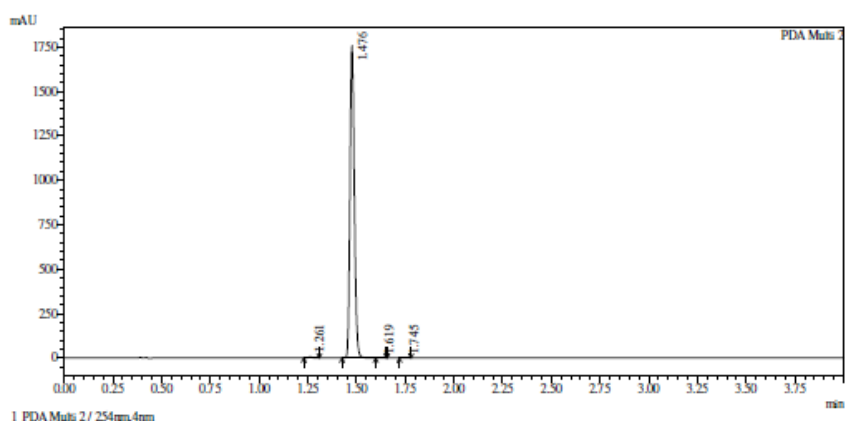

Integration result

| PeakTable     |           |           |            |         |         |         |
|---------------|-----------|-----------|------------|---------|---------|---------|
| PDA Ch2 254nm |           |           |            |         |         |         |
| Peak#         | Ret. Time | USP Width | Resolution | Height  | Area    | Area %  |
| 1             | 1.261     | 0.042     | 0.000      | 6344    | 9836    | 0.358   |
| 2             | 1.476     | 0.042     | 5.087      | 1758970 | 2734198 | 99.560  |
| 3             | 1.619     | 0.042     | 3.388      | 746     | 1125    | 0.041   |
| 4             | 1.745     | 0.045     | 2.918      | 674     | 1111    | 0.040   |
| Total         |           |           |            | 1766734 | 2746270 | 100.000 |

**HRMS (2*R*,3*R*,4*S*,5*S*)-2-(6-Aminopurin-9-yl)-5-(1,3-benzothiazol-2-ylsulfanylmethyl) tetrahydrofuran-3,4-diol (19)**

Compound Table

| Label                                                                                       | Tgt Score | Mass Error (ppm) | Tgt Formula                                                                  | Obs. RT | Ref. Mass | Obs. Mass |
|---------------------------------------------------------------------------------------------|-----------|------------------|------------------------------------------------------------------------------|---------|-----------|-----------|
| Cpd 1: C <sub>19</sub> H <sub>20</sub> N <sub>6</sub> O <sub>3</sub> S <sub>2</sub> : 1.810 | 96.37     | 6.14             | C <sub>19</sub> H <sub>20</sub> N <sub>6</sub> O <sub>3</sub> S <sub>2</sub> | 1.81    | 444.1038  | 444.1066  |

| Obs. <i>m/z</i> | Obs. RT | Obs. Mass | Tgt Formula                                                                  | Tgt Mass | Tgt Mass Error (ppm) | Find Cpds Algorithm |
|-----------------|---------|-----------|------------------------------------------------------------------------------|----------|----------------------|---------------------|
| 223.0598        | 1.81    | 444.1066  | C <sub>19</sub> H <sub>20</sub> N <sub>6</sub> O <sub>3</sub> S <sub>2</sub> | 444.1038 | 6.14                 | Find by Formula     |

Compound Chromatograms

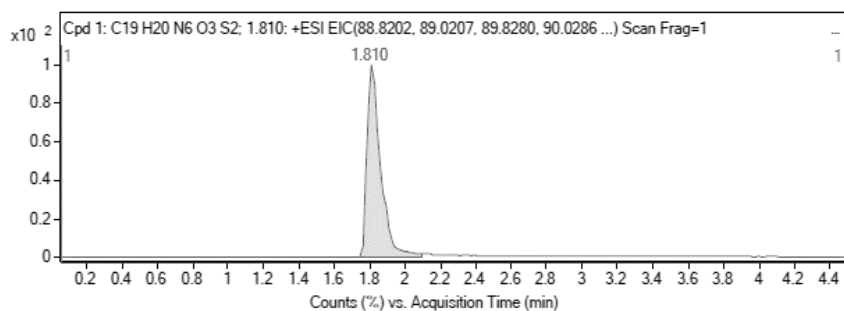

MS Zoomed Spectrum

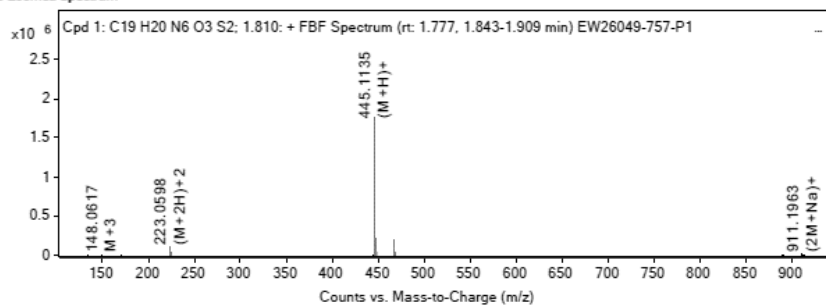

MS Spectrum Peak List

| Obs. <i>m/z</i> | Charge | Abund    | Ion/Isotope          |
|-----------------|--------|----------|----------------------|
| 223.0598        | 2      | 97239.34 | (M+2H) <sup>2+</sup> |
| 223.5612        | 2      | 24231.24 | (M+2H) <sup>2+</sup> |



|          |   |           |                        |                        |
|----------|---|-----------|------------------------|------------------------|
| 224.0591 | 2 | 12233.51  | [(M+2H)] <sup>2+</sup> |                        |
| 445.1135 | 1 | 17604.36  | 13                     | [(M+H)] <sup>+</sup>   |
| 446.1153 | 1 | 444699.91 | [(M+H)] <sup>+</sup>   |                        |
| 447.1109 | 1 | 214511.19 | [(M+H)] <sup>+</sup>   |                        |
| 467.0945 | 1 | 200039.48 | [(M+Na)] <sup>+</sup>  |                        |
| 468.0965 | 1 | 47714.09  | [(M+Na)] <sup>+</sup>  |                        |
| 469.0922 | 1 | 23735.76  | [(M+Na)] <sup>+</sup>  |                        |
| 911.1963 | 1 | 11867.88  | 2                      | [(2M+Na)] <sup>+</sup> |

MS Zoomed Spectrum

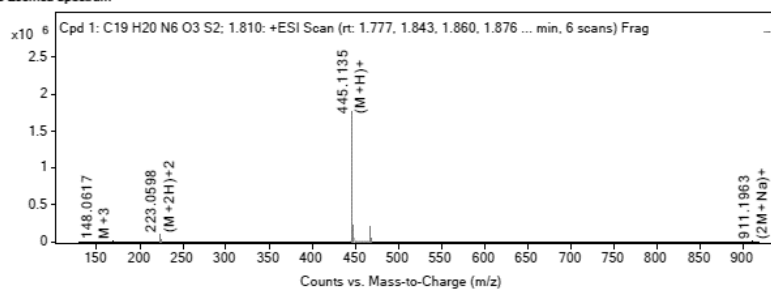

MS Spectrum Peak List

| Obs. m/z | Charge | Abund     | Ion/Isotope            | Tgt Mass Error (ppm)   |
|----------|--------|-----------|------------------------|------------------------|
| 223.0598 | 2      | 57238.34  | [(M+2H)] <sup>2+</sup> | -2.28                  |
| 223.5612 | 2      | 24231.24  | [(M+2H)] <sup>2+</sup> | -2.39                  |
| 224.0591 | 2      | 12233.51  | [(M+2H)] <sup>2+</sup> | -3.03                  |
| 445.1135 | 1      | 17604.36  | 13                     | [(M+H)] <sup>+</sup>   |
| 446.1153 | 1      | 444699.91 | [(M+H)] <sup>+</sup>   | -3.55                  |
| 447.1109 | 1      | 214511.19 | [(M+H)] <sup>+</sup>   | -3.17                  |
| 467.0945 | 1      | 200039.48 | [(M+Na)] <sup>+</sup>  | -3.19                  |
| 468.0965 | 1      | 47714.09  | [(M+Na)] <sup>+</sup>  | -1.8                   |
| 469.0922 | 1      | 23735.76  | [(M+Na)] <sup>+</sup>  | -1.55                  |
| 911.1963 | 1      | 11867.88  | 2                      | [(2M+Na)] <sup>+</sup> |

— End Of Report —

**<sup>1</sup>H NMR** [(2*R*,3*R*,4*R*,5*R*)-3,4-Bis[[*tert*-butyl(dimethyl)silyl]oxy]-5-(6-chloropurin-9-yl) tetrahydrofuran-2-yl]methoxy-*tert*-butyl-dimethyl-silane (**96**)

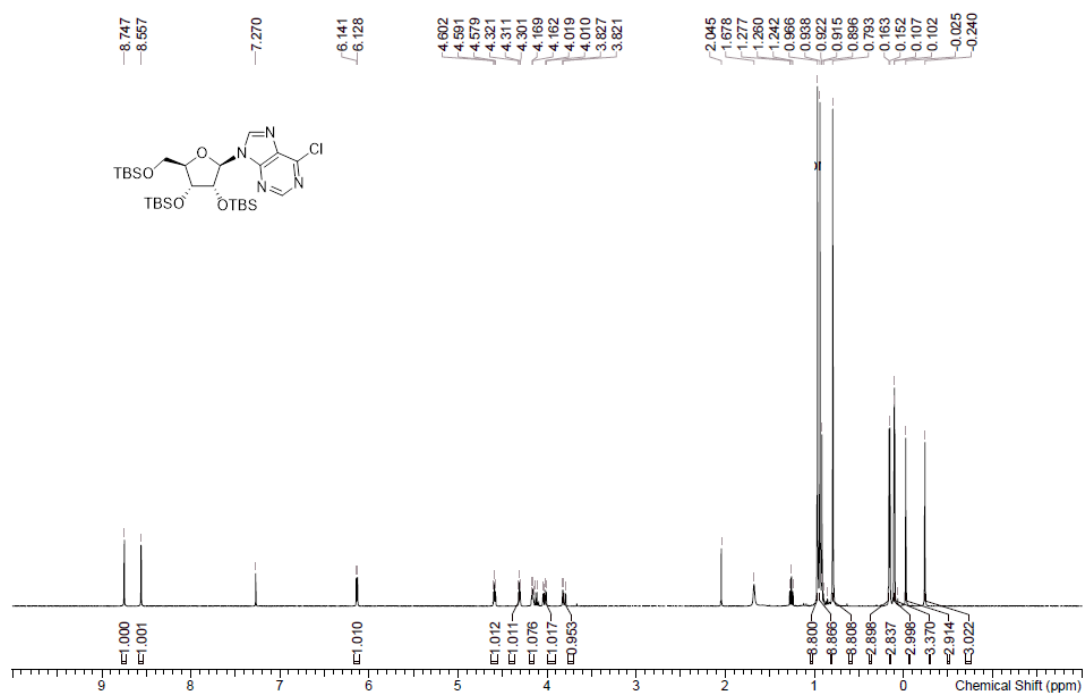

**<sup>1</sup>H NMR** [(2*R*,3*R*,4*R*,5*R*)-3,4-Bis[[*tert*-butyl(dimethyl)silyl]oxy]-5- (6-chloropurin-9-yl)tetrahydrofuran-2-yl]methanol (**46**)

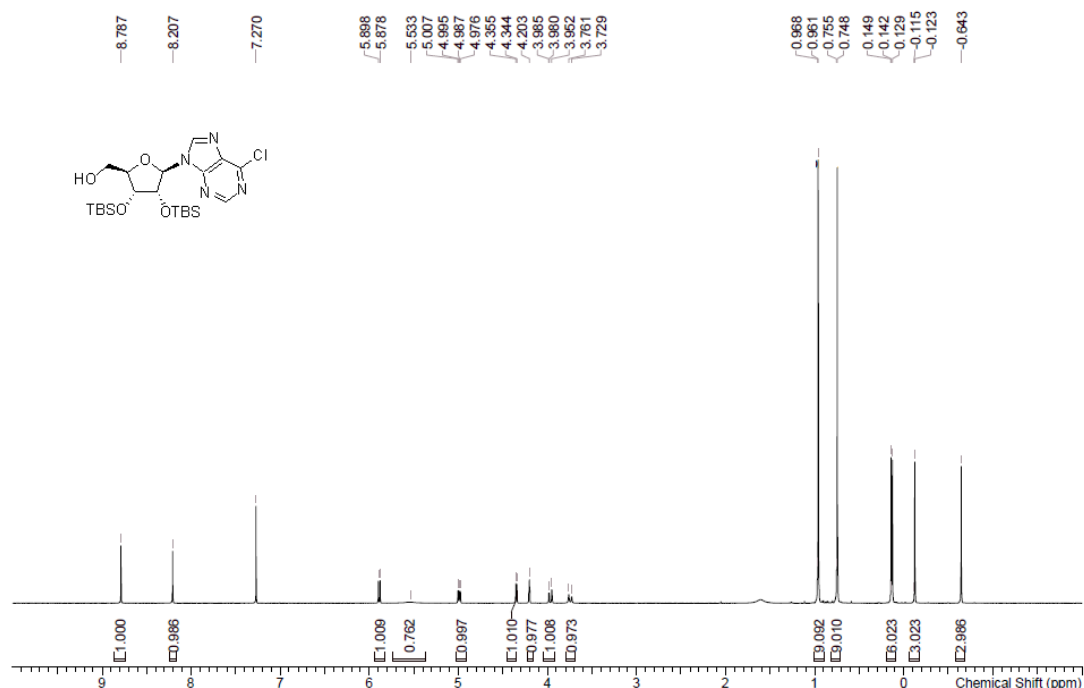

**LCMS** [(2*R*,3*R*,4*R*,5*R*)-3,4-Bis[[*tert*-butyl(dimethyl)silyl]oxy]-5- (6-chloropurin-9-yl)tetrahydrofuran-2-yl]methanol (**46**)

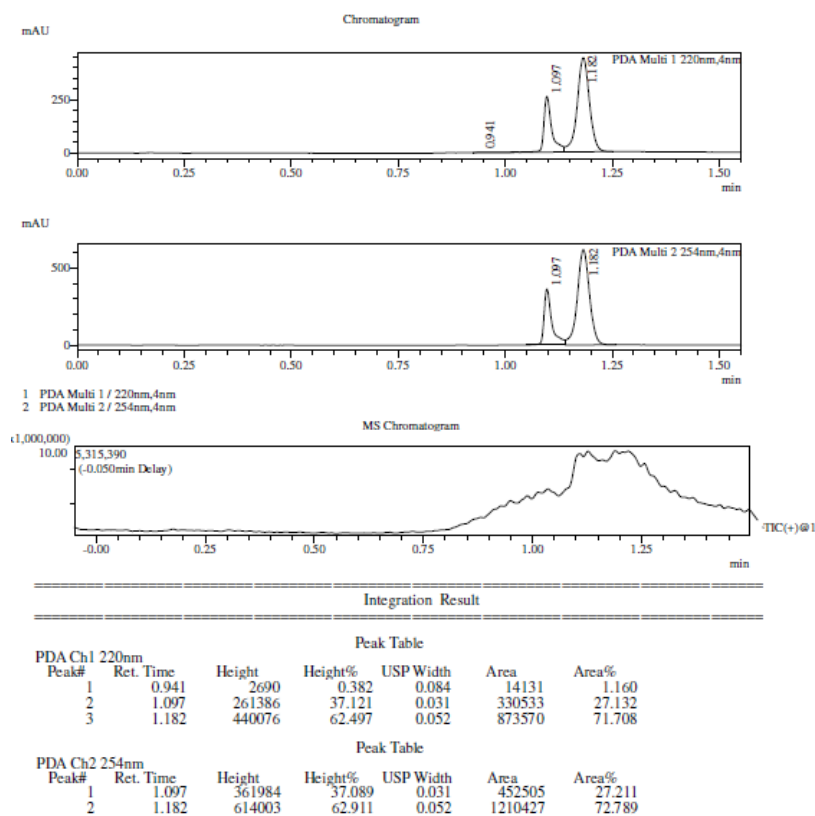

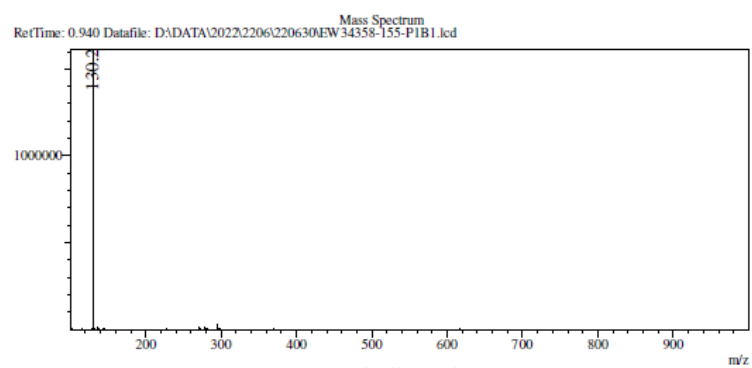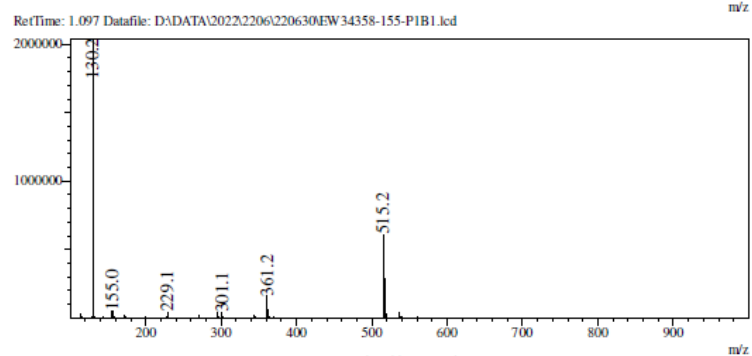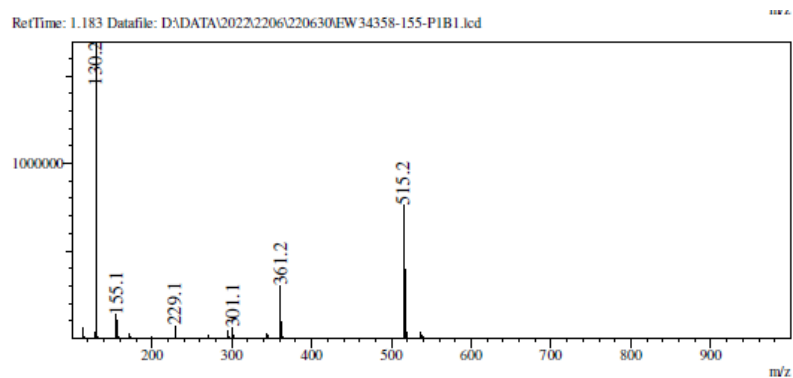

**<sup>1</sup>H NMR** [(2R,3R,4R,5R)-3,4-Bis[[tert-butyl(dimethyl)silyl]oxy]-5- (6-chloropurin-9-yl)tetrahydrofuran-2-yl]methyl methanesulfonate (**97**)

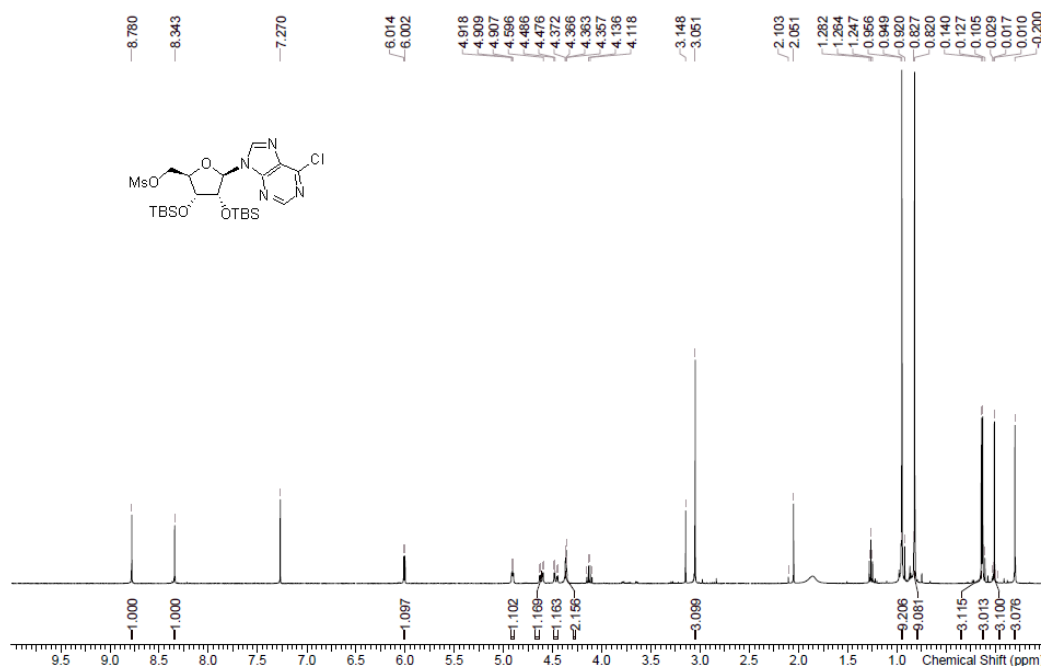

**LCMS** [(2R,3R,4R,5R)-3,4-Bis[[tert-butyl(dimethyl)silyl]oxy]-5- (6-chloropurin-9-yl)tetrahydrofuran-2-yl]methyl methanesulfonate (**97**)

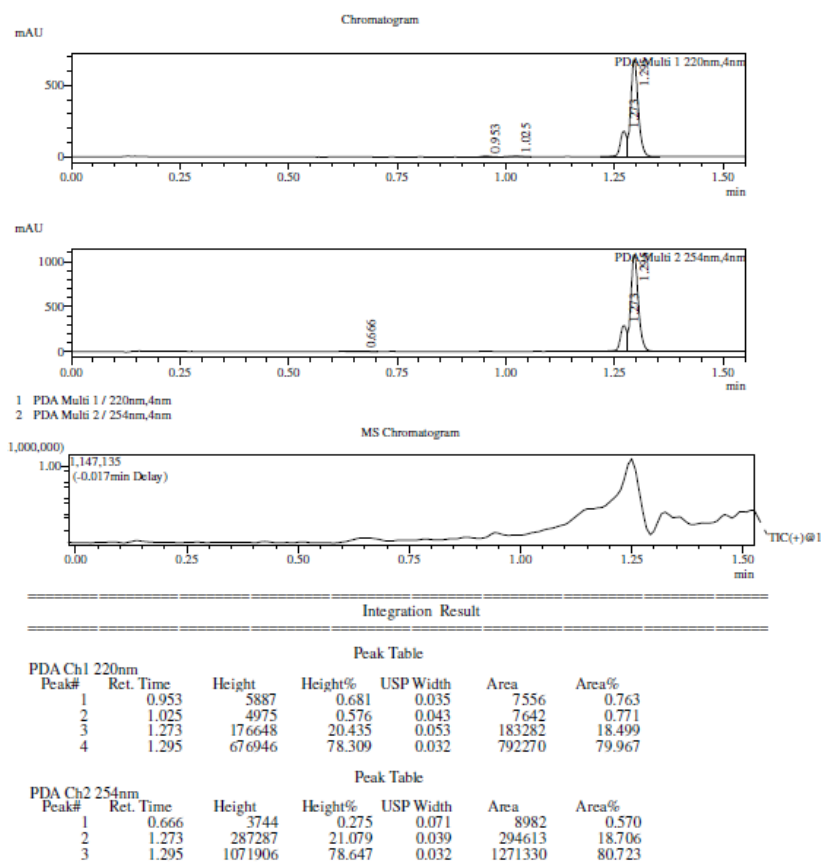

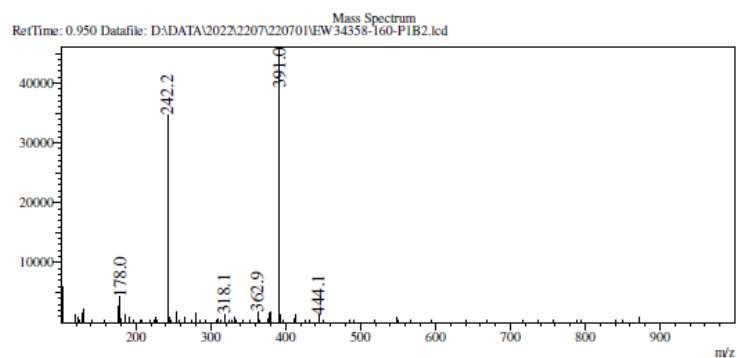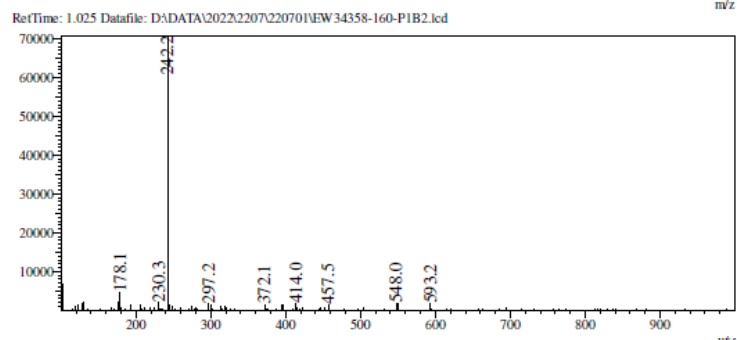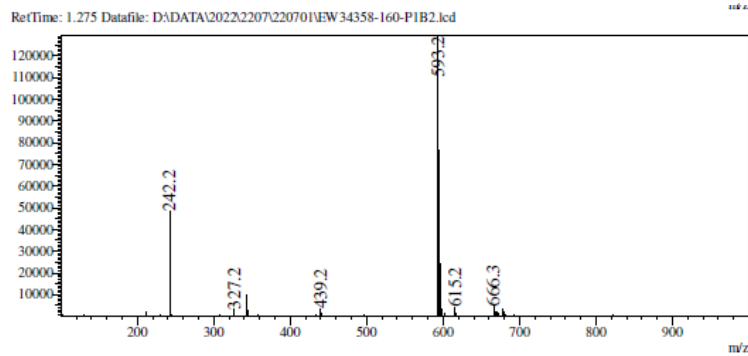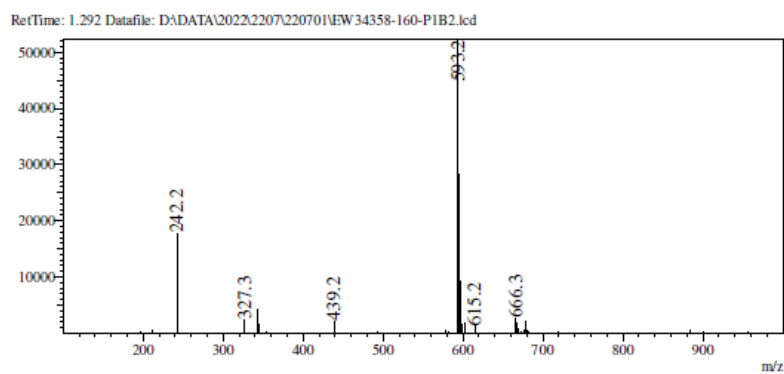

**<sup>1</sup>H NMR** [(2*R*,3*R*,4*R*,5*R*)-3,4-Bis[[*tert*-butyl(dimethyl)silyl]oxy]-5-[6- (cyclopentylamino)purin-9-yl]tetrahydrofuran-2-yl]methyl methanesulfonate (**98a**)

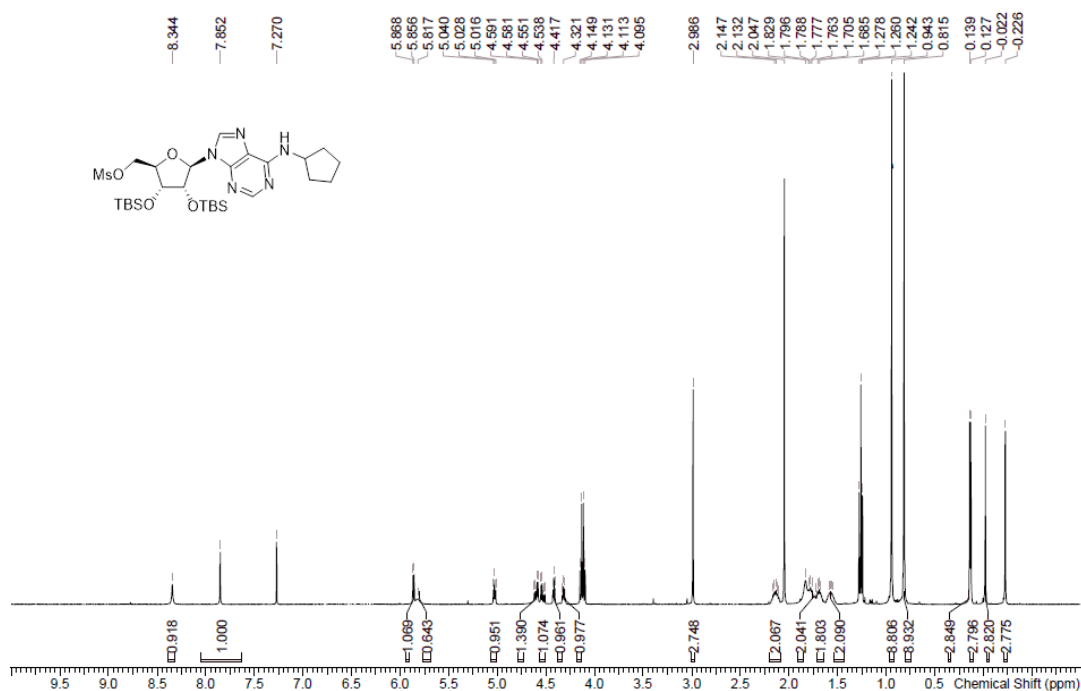

**LCMS** [(2*R*,3*R*,4*R*,5*R*)-3,4-Bis[[*tert*-butyl(dimethyl)silyl]oxy]-5-[6- (cyclopentylamino)purin-9-yl]tetrahydrofuran-2-yl]methyl methanesulfonate (**98a**)

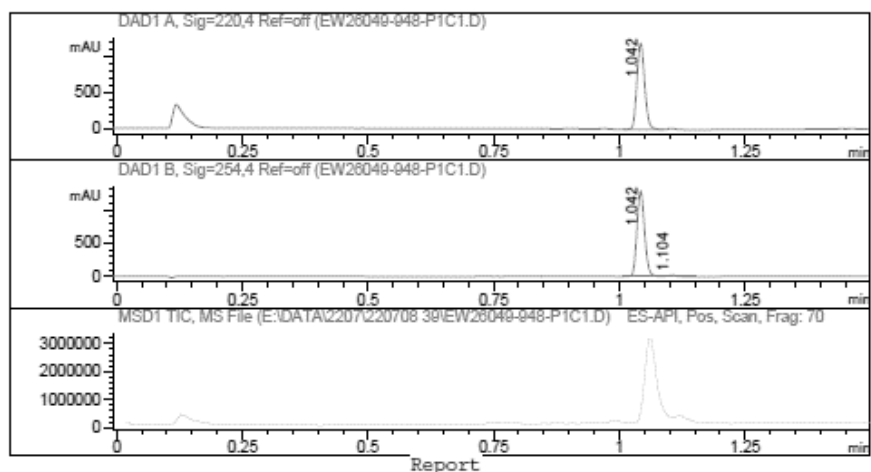

| Report                               |       |       |          |       |          |         |
|--------------------------------------|-------|-------|----------|-------|----------|---------|
| Signal 1 : DAD1 A, Sig=220,4 Ref=off |       |       |          |       |          |         |
| #                                    | Meas. | Ret.  | Height   | Width | Area     | Area %  |
| 1                                    |       | 1.042 | 1193.730 | 0.017 | 1272.045 | 100.000 |
| Signal 2 : DAD1 B, Sig=254,4 Ref=off |       |       |          |       |          |         |
| #                                    | Meas. | Ret.  | Height   | Width | Area     | Area %  |
| 1                                    |       | 1.042 | 1282.981 | 0.017 | 1355.217 | 98.286  |
| 2                                    |       | 1.104 | 19.359   | 0.018 | 23.638   | 1.714   |

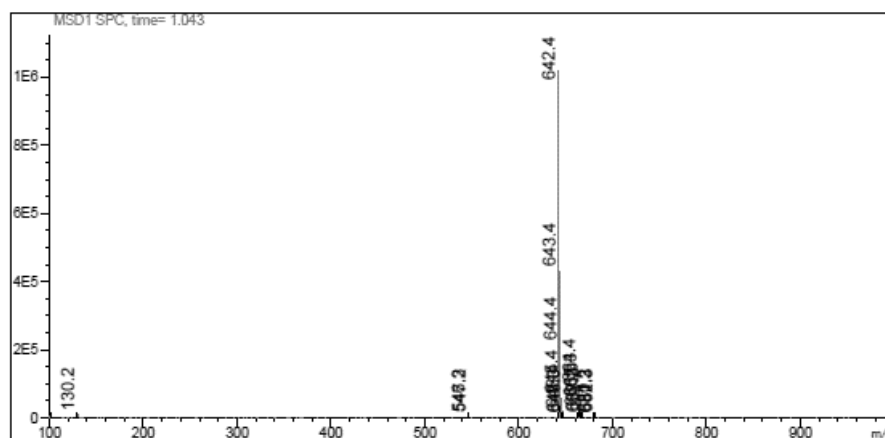

**<sup>1</sup>H NMR** ((2R,3R,4R,5R)-3,4-bis((tert-butyldimethylsilyl)oxy)-5-(6-(isopropylamino)-9H-purin-9-yl)tetrahydrofuran-2-yl)methyl methanesulfonate (**98b**)

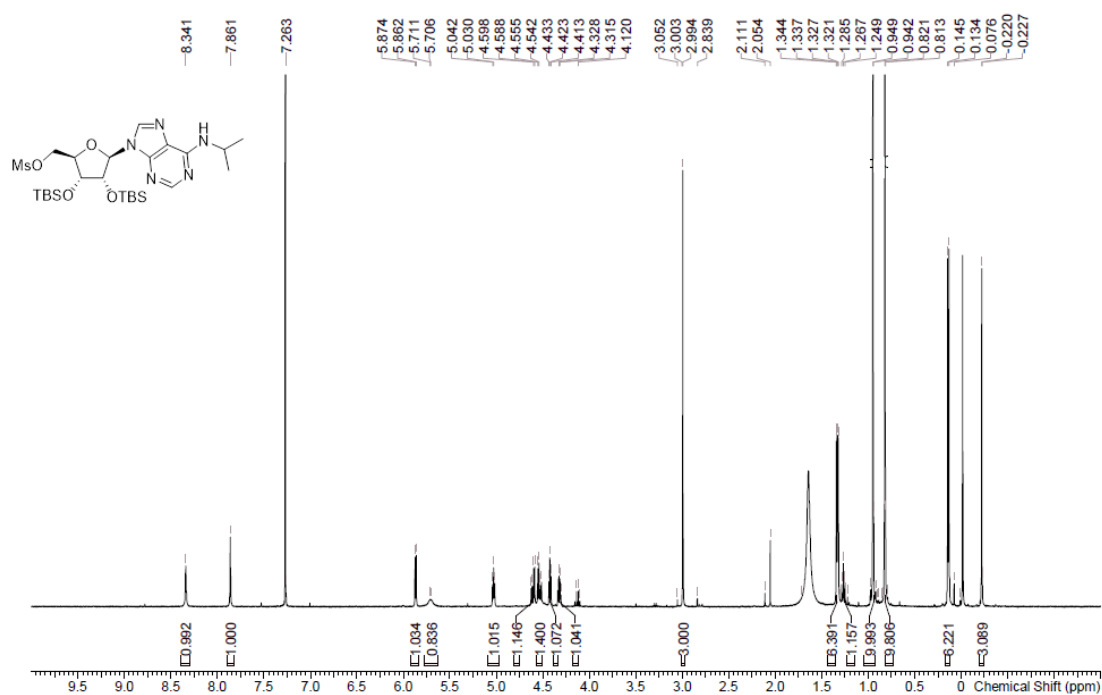

**LCMS** ((2R,3R,4R,5R)-3,4-bis((tert-butyldimethylsilyl)oxy)-5-(6-(isopropylamino)-9H-purin-9-yl)tetrahydrofuran-2-yl)methyl methanesulfonate (**98b**)

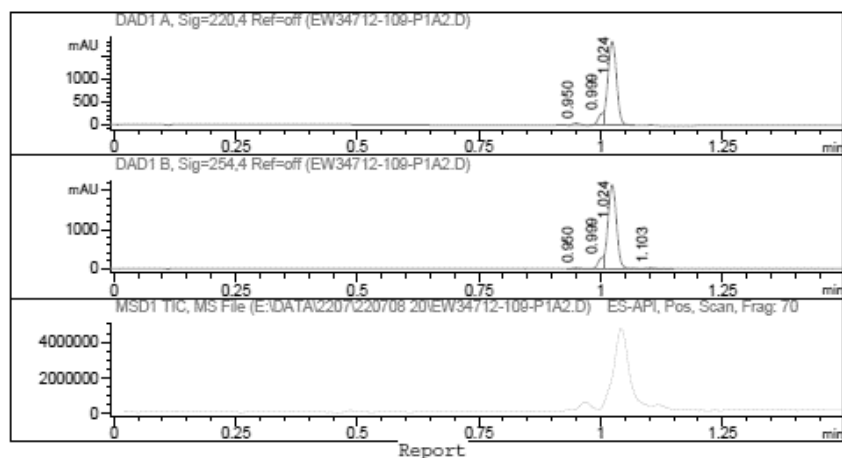

Signal 1 : DAD1 A, Sig=220,4 Ref=off

| # | Meas. | Ret. | Height   | Width | Area     | Area % |
|---|-------|------|----------|-------|----------|--------|
| 1 | 0.950 |      | 45.902   | 0.015 | 46.440   | 1.855  |
| 2 | 0.999 |      | 229.513  | 0.012 | 181.405  | 7.246  |
| 3 | 1.024 |      | 1824.052 | 0.020 | 2275.589 | 90.899 |

Signal 2 : DAD1 B, Sig=254,4 Ref=off

| # | Meas. | Ret.     | Height | Width | Area     | Area % |
|---|-------|----------|--------|-------|----------|--------|
| 1 | 0.950 | 19.879   | 0.016  |       | 20.378   | 0.707  |
| 2 | 0.999 | 251.896  | 0.012  |       | 197.907  | 6.865  |
| 3 | 1.024 | 2149.022 | 0.019  |       | 2637.716 | 91.503 |
| 4 | 1.103 | 21.182   | 0.019  |       | 26.654   | 0.925  |

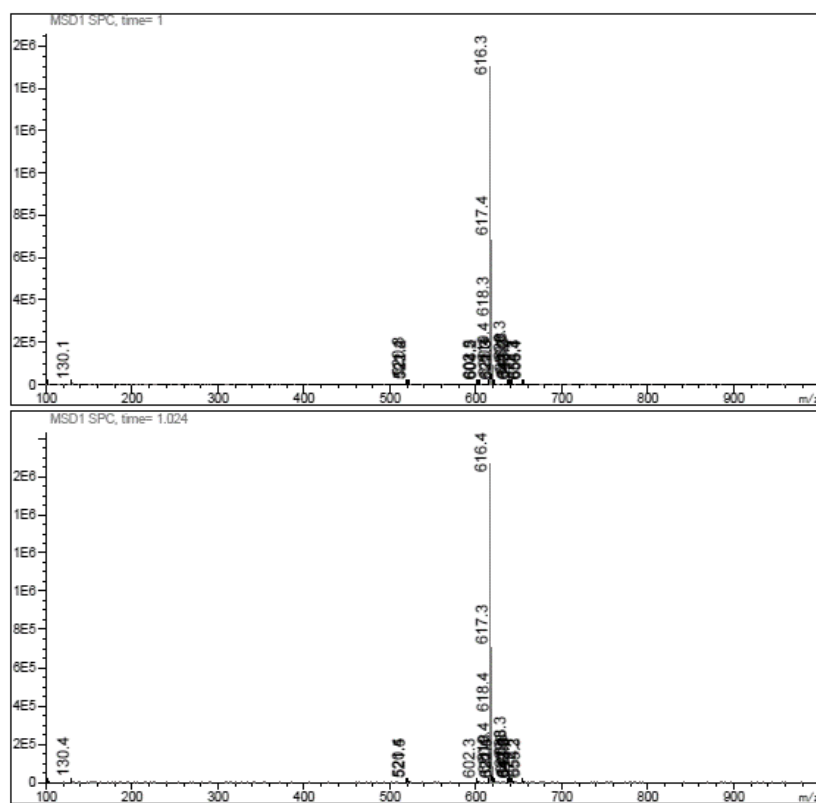



**<sup>1</sup>H NMR** [(2*R*,3*R*,4*R*,5*R*)-3,4-Bis[[*tert*-butyl(dimethyl)silyl]oxy]-5-[6-(oxetan-3-ylamino)purin-9-yl]tetrahydrofuran-2-yl]methyl methanesulfonate (**98c**)

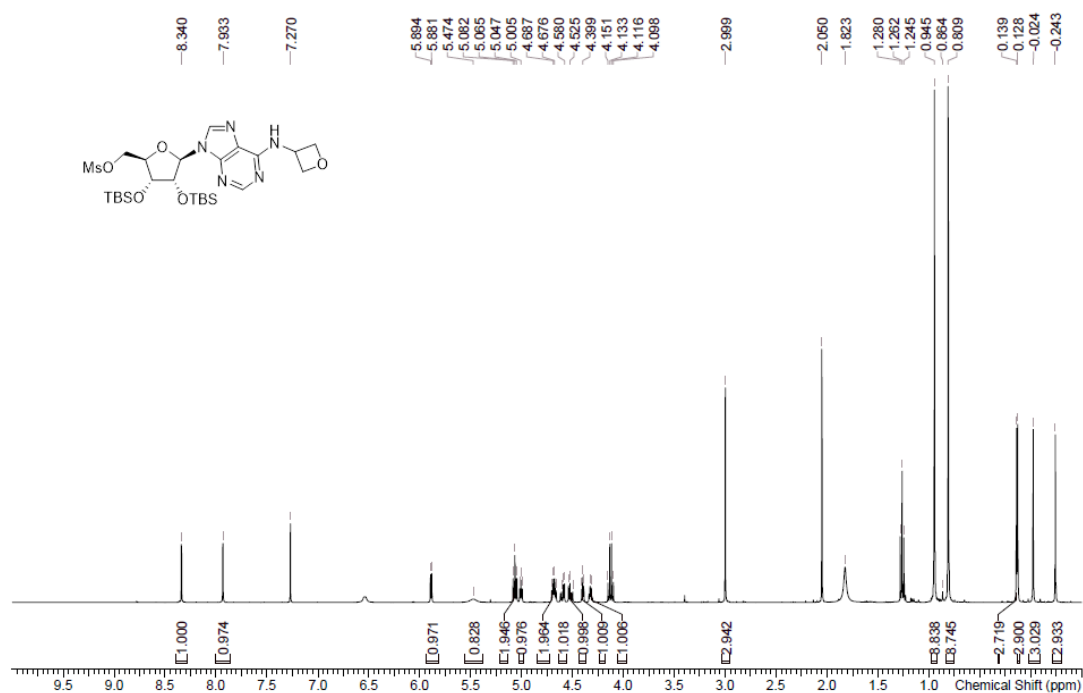

**LCMS** [(2*R*,3*R*,4*R*,5*R*)-3,4-Bis[[*tert*-butyl(dimethyl)silyl]oxy]-5-[6-(oxetan-3-ylamino)purin-9-yl]tetrahydrofuran-2-yl]methyl methanesulfonate (**98c**)

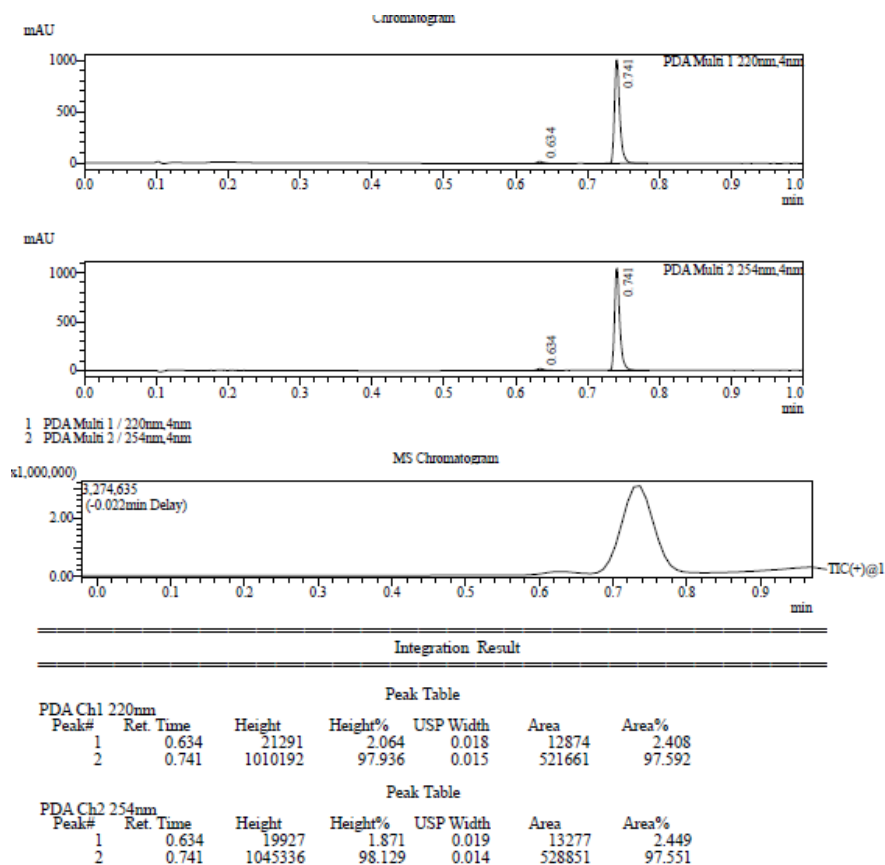

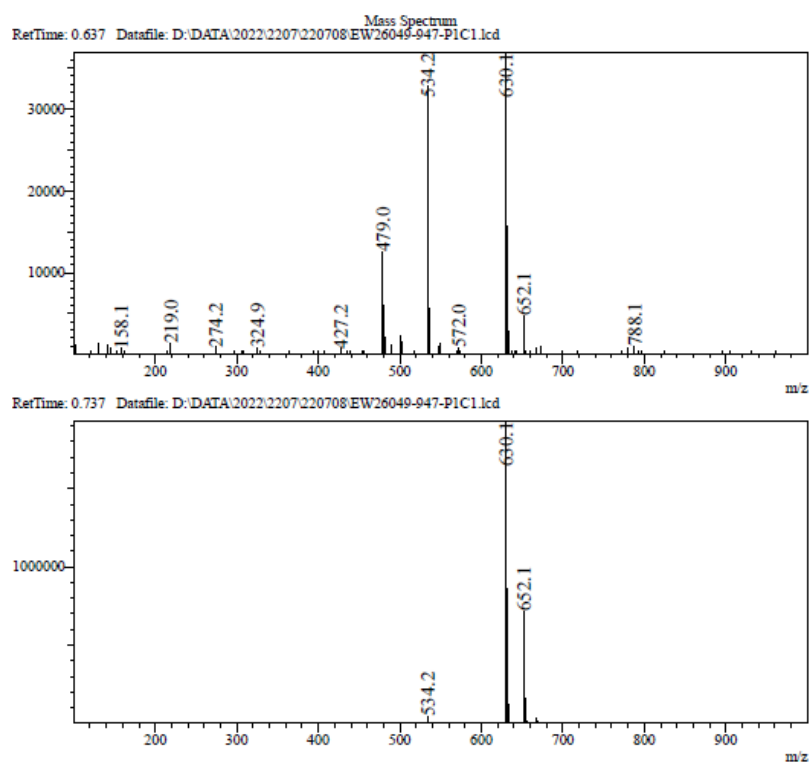

**<sup>1</sup>H NMR** 9-[(2*R*,3*R*,4*R*,5*S*)-5-(1,3-Benzothiazol-2-ylsulfanylmethyl)-3,4-bis [[*tert*-butyl(dimethyl)silyl]oxy]tetrahydrofuran-2-yl]-*N*-cyclopentyl-purin-6-amine (**99a**)

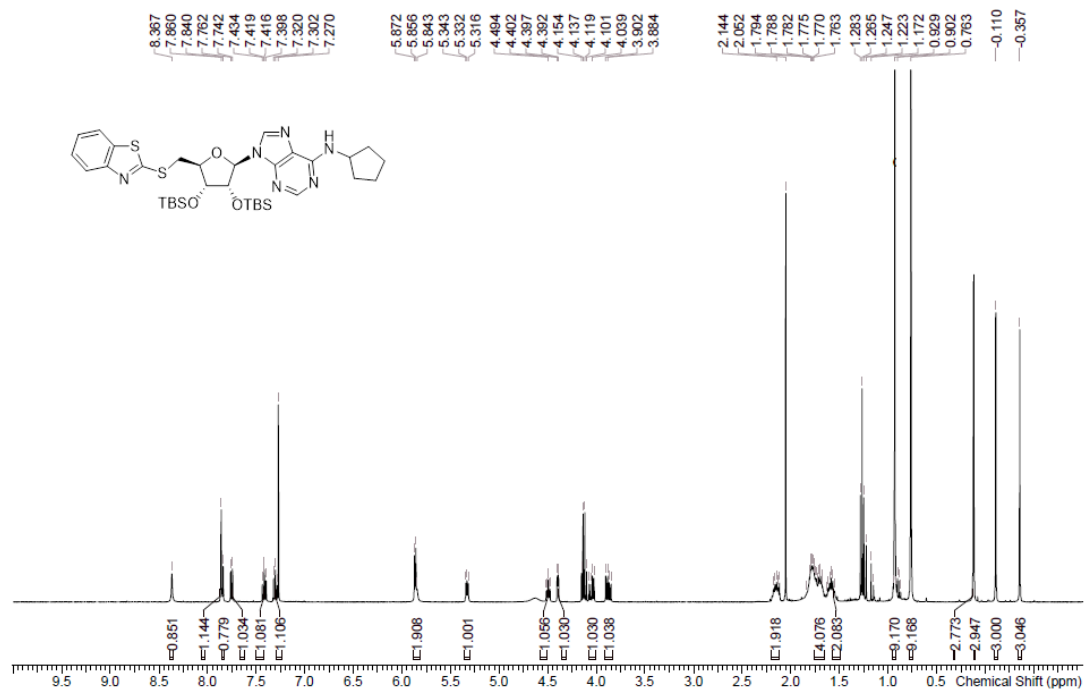

**LCMS 9-[(2R,3R,4R,5S)-5-(1,3-Benzothiazol-2-ylsulfanylmethyl)-3,4-bis [[tert-butyl(dimethyl)silyl]oxy]tetrahydrofuran-2-yl]-N-cyclopentyl-purin-6-amine (99a)**

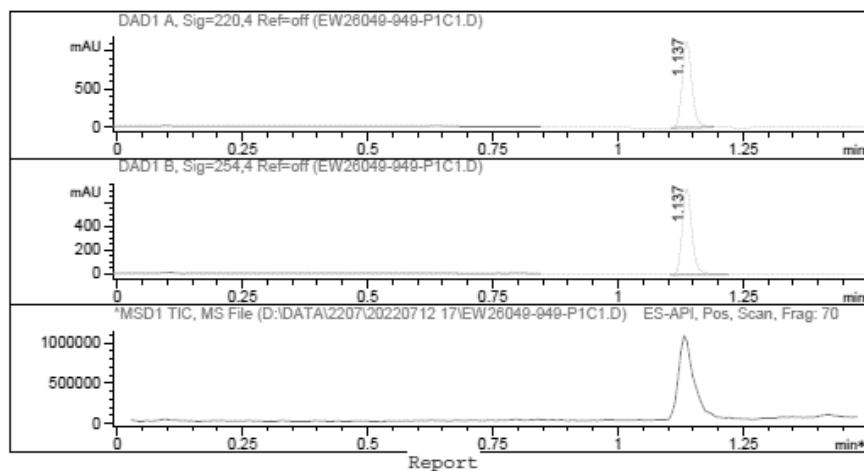

| Report                               |       |       |          |       |          |         |
|--------------------------------------|-------|-------|----------|-------|----------|---------|
| =====                                |       |       |          |       |          |         |
| Signal 1 : DAD1 A, Sig=220,4 Ref=off |       |       |          |       |          |         |
| #                                    | Meas. | Ret.  | Height   | Width | Area     | Area %  |
| 1                                    |       | 1.137 | 1146.083 | 0.021 | 1555.363 | 100.000 |
| -----                                |       |       |          |       |          |         |
| Signal 2 : DAD1 B, Sig=254,4 Ref=off |       |       |          |       |          |         |
| #                                    | Meas. | Ret.  | Height   | Width | Area     | Area %  |
| 1                                    |       | 1.137 | 733.089  | 0.021 | 991.781  | 100.000 |
| -----                                |       |       |          |       |          |         |

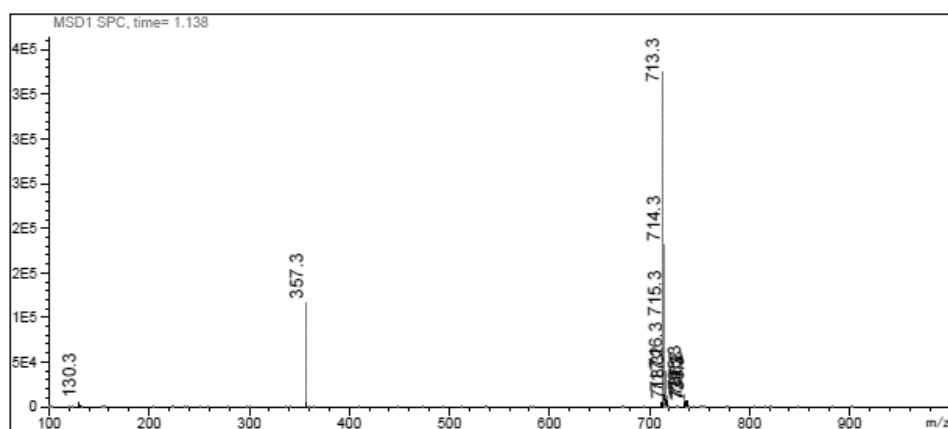

**<sup>1</sup>H NMR** 9-((2R,3R,4R,5S)-5-((Benzo[d]thiazol-2-ylthio)methyl)-3,4-bis((tert-butyldimethylsilyl)oxy)tetrahydrofuran-2-yl)-N-isopropyl-9H-purin-6-amine (**99b**)

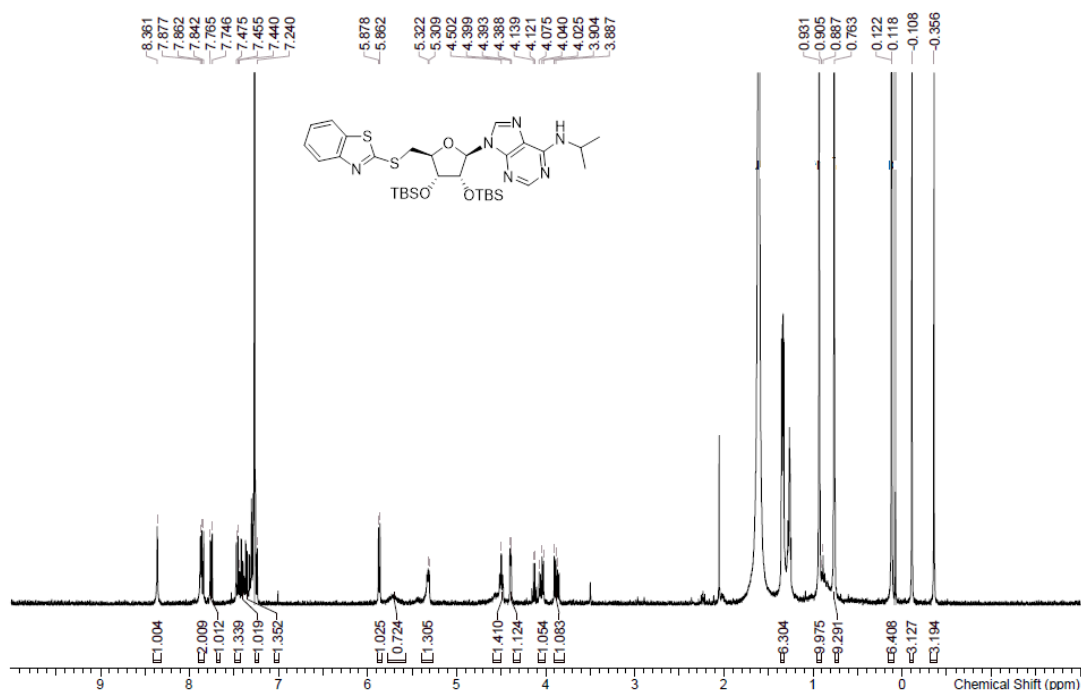

**LCMS** 9-((2R,3R,4R,5S)-5-((Benzo[d]thiazol-2-ylthio)methyl)-3,4-bis((tert-butyldimethylsilyl)oxy)tetrahydrofuran-2-yl)-N-isopropyl-9H-purin-6-amine (**99b**)

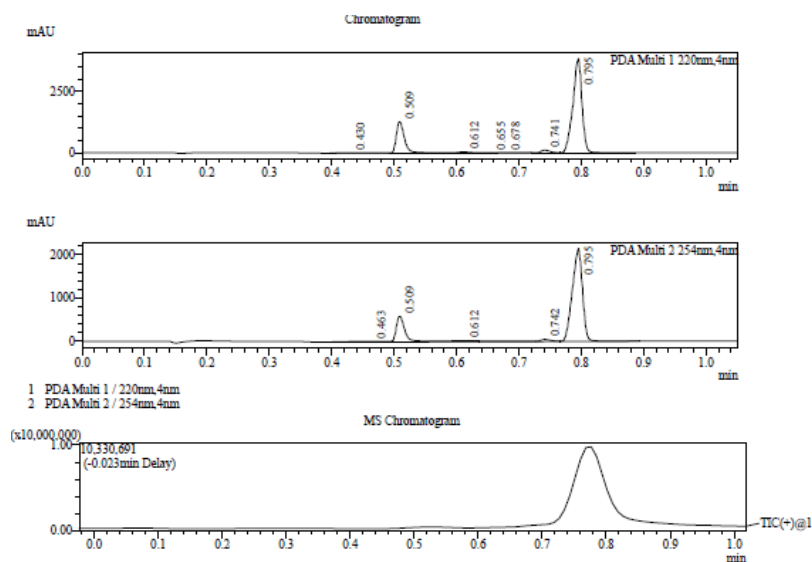

Integration Result

| Peak Table |           |         |         |           |         |        |
|------------|-----------|---------|---------|-----------|---------|--------|
| Peak#      | Ret. Time | Height  | Height% | USP Width | Area    | Area%  |
| 1          | 0.430     | 4972    | 0.096   | 0.168     | 21712   | 0.411  |
| 2          | 0.509     | 1251280 | 24.182  | 0.022     | 1155805 | 21.832 |
| 3          | 0.612     | 37196   | 0.719   | 0.040     | 65123   | 1.231  |
| 4          | 0.655     | 8850    | 0.171   | 0.701     | 11215   | 0.212  |
| 5          | 0.678     | 7442    | 0.144   | 0.152     | 21279   | 0.402  |
| 6          | 0.741     | 111391  | 2.153   | 0.025     | 114920  | 2.173  |
| 7          | 0.795     | 3753388 | 72.536  | 0.025     | 3899128 | 73.719 |

| Peak Table |           |        |         |           |        |        |
|------------|-----------|--------|---------|-----------|--------|--------|
| Peak#      | Ret. Time | Height | Height% | USP Width | Area   | Area%  |
| 1          | 0.463     | 14669  | 0.530   | 0.322     | 73035  | 2.229  |
| 2          | 0.509     | 586325 | 21.186  | 0.023     | 649717 | 19.830 |

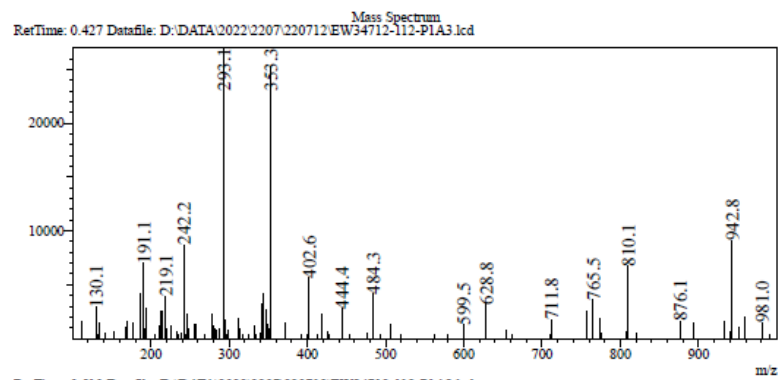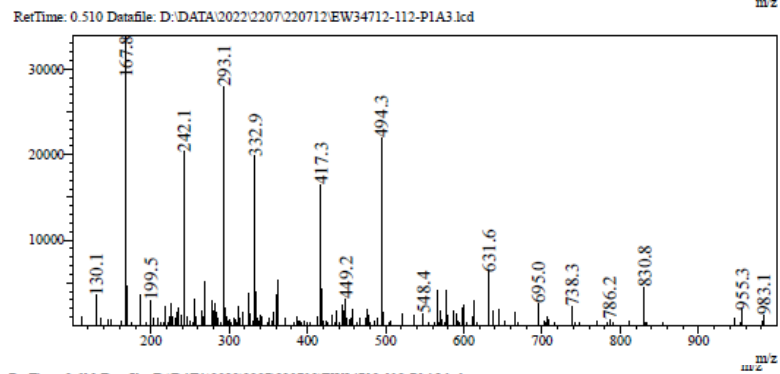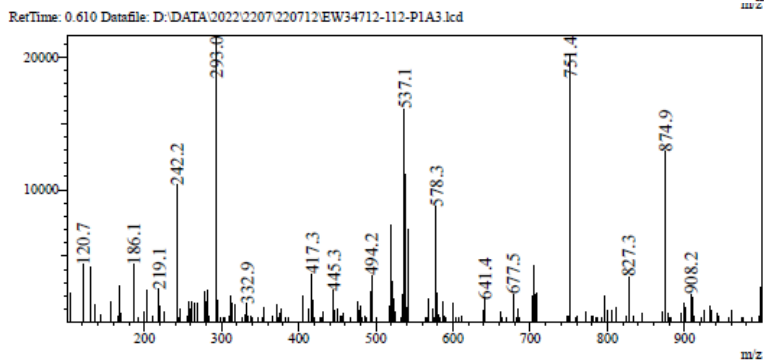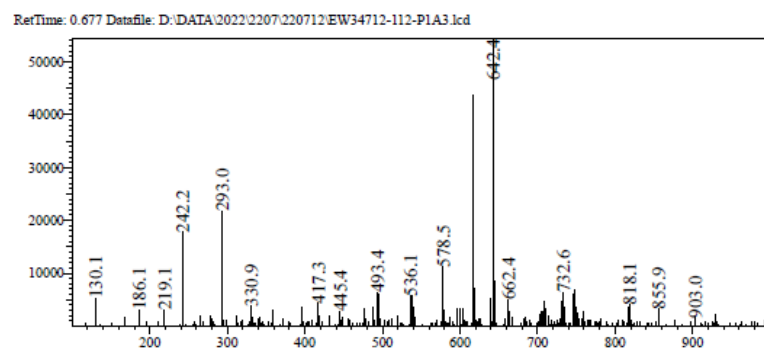

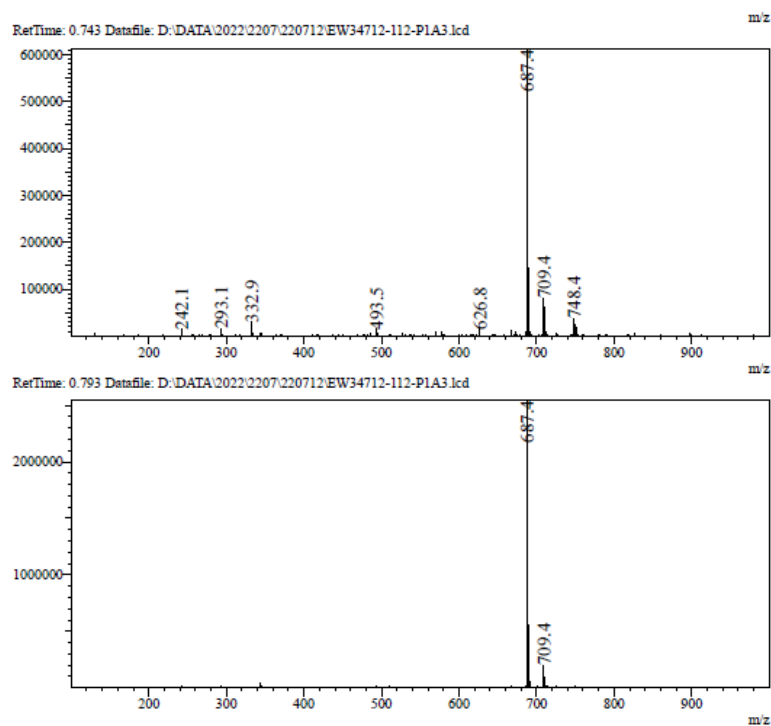

**<sup>1</sup>H NMR** 9-[(2*R*,3*R*,4*R*,5*S*)-5-(1,3-Benzothiazol-2-ylsulfanylmethyl)-3,4-bis [[*tert*-butyl(dimethyl)silyl]oxy]tetrahydrofuran-2-yl]-*N*-(oxetan-3-yl)purin-6-amine (**99c**)

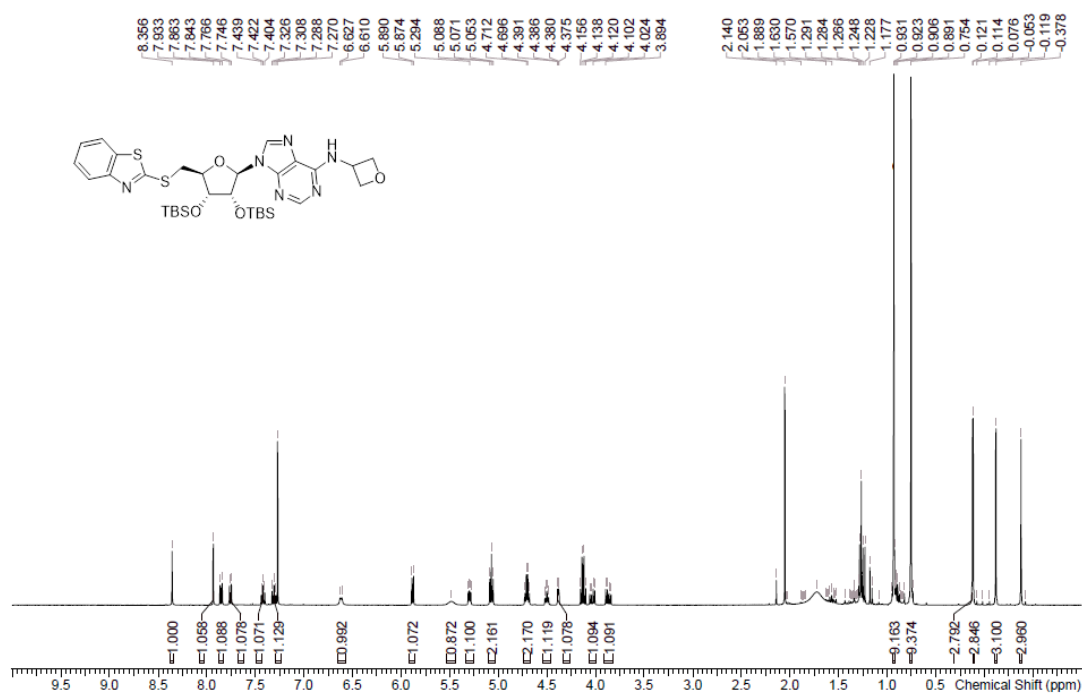

**LCMS 9-[(2R,3R,4R,5S)-5-(1,3-Benzothiazol-2-ylsulfanylmethyl)-3,4-bis [[tert-butyl(dimethyl)silyl]oxy]tetrahydrofuran-2-yl]-N-(oxetan-3-yl)purin-6-amine (99c)**

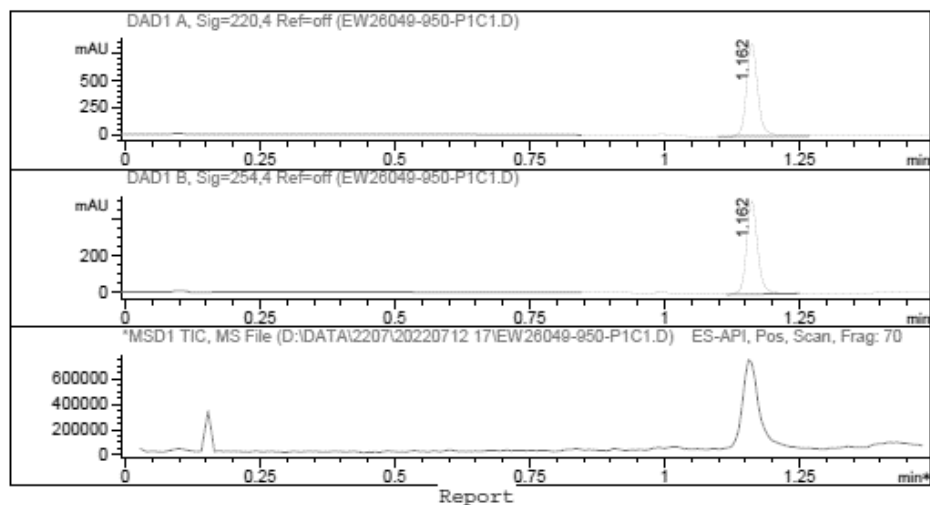

|                                      |            |         |       |          |         |
|--------------------------------------|------------|---------|-------|----------|---------|
| Signal 1 : DAD1 A, Sig=220,4 Ref=off |            |         |       |          |         |
| #                                    | Meas. Ret. | Height  | Width | Area     | Area %  |
| 1                                    | 1.162      | 861.984 | 0.022 | 1249.093 | 100.000 |

|                                      |            |         |       |         |         |
|--------------------------------------|------------|---------|-------|---------|---------|
| Signal 2 : DAD1 B, Sig=254,4 Ref=off |            |         |       |         |         |
| #                                    | Meas. Ret. | Height  | Width | Area    | Area %  |
| 1                                    | 1.162      | 504.668 | 0.022 | 724.241 | 100.000 |

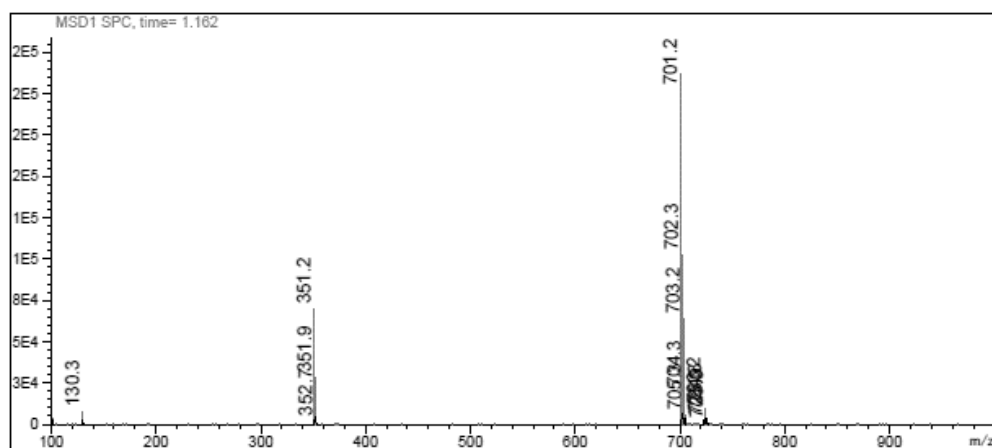

**<sup>1</sup>H NMR** (2*S*,3*S*,4*R*,5*R*)-2-(1,3-Benzothiazol-2-ylsulfanylmethyl)-5- [6-(cyclopentylamino)purin-9-yl]tetrahydrofuran-3,4-diol (**20**)

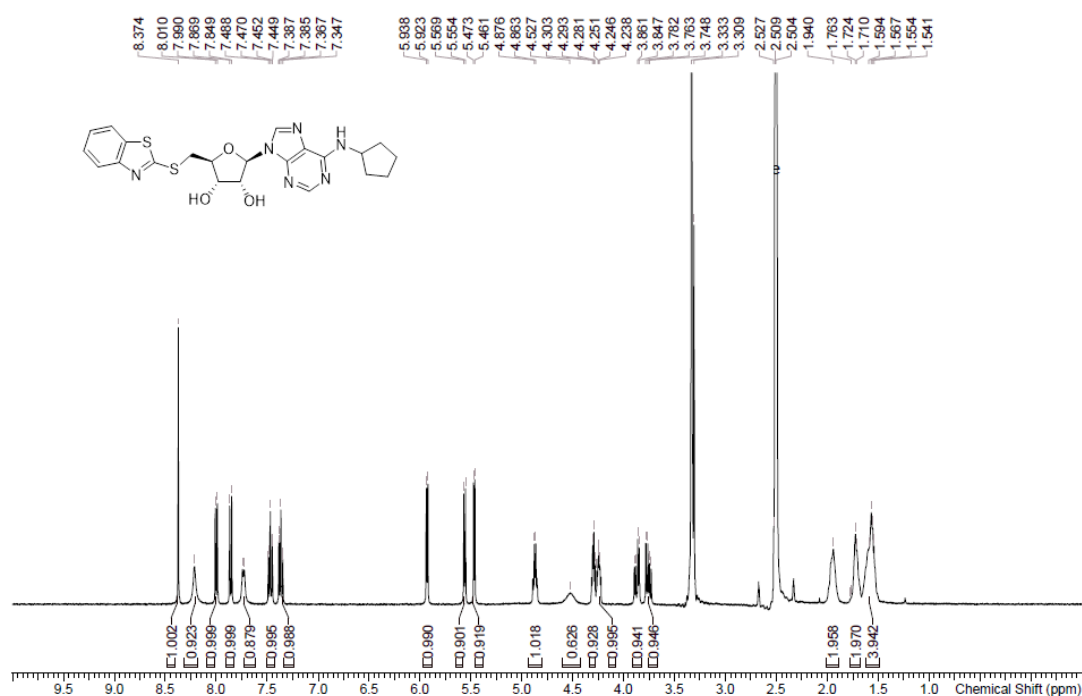

**HPLC** (2*S*,3*S*,4*R*,5*R*)-2-(1,3-Benzothiazol-2-ylsulfanylmethyl)-5- [6-(cyclopentylamino)purin-9-yl]tetrahydrofuran-3,4-diol (**20**)

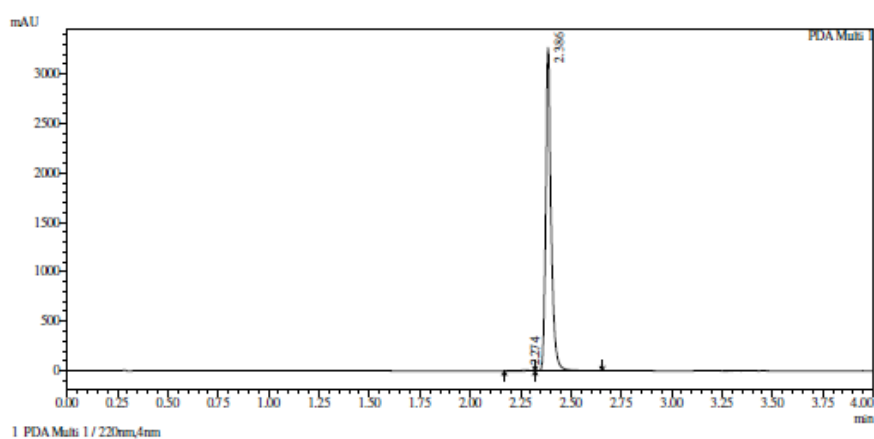

Integration result

| PeakTable |           |           |            |         |         |         |
|-----------|-----------|-----------|------------|---------|---------|---------|
| Peak#     | Ret. Time | USP Width | Resolution | Height  | Area    | Area %  |
| 1         | 2.274     | 0.306     | 0.000      | 5003    | 26154   | 0.427   |
| 2         | 2.386     | 0.044     | 0.643      | 3267417 | 6099750 | 99.573  |
| Total     |           |           |            | 3272420 | 6125904 | 100.000 |



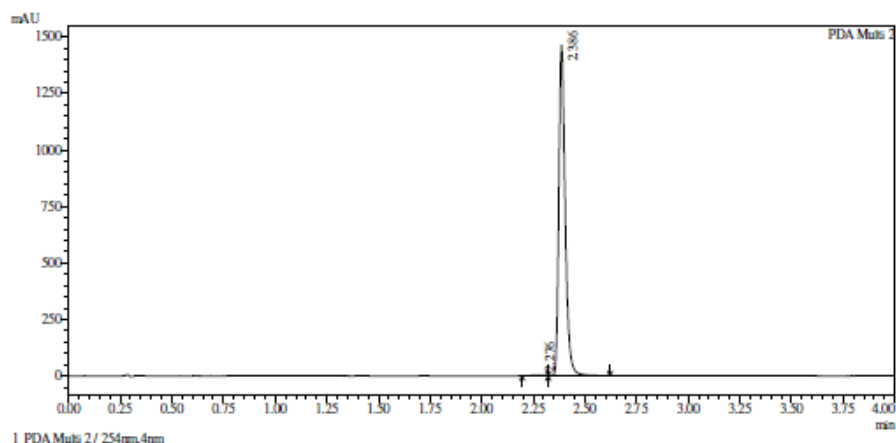

#### Integration result

| PeakTable |           |           |            |         |         |         |
|-----------|-----------|-----------|------------|---------|---------|---------|
| Peak#     | Ret. Time | USP Width | Resolution | Height  | Area    | Area %  |
| 1         | 2.276     | 0.156     | 0.000      | 2919    | 13658   | 0.434   |
| 2         | 2.386     | 0.056     | 1.040      | 1463094 | 3132168 | 99.566  |
| Total     |           |           |            | 1466014 | 3145826 | 100.000 |

**HRMS** (2*S*,3*S*,4*R*,5*R*)-2-(1,3-Benzothiazol-2-ylsulfanylmethyl)-5- [6-(cyclopentylamino)purin-9-yl]tetrahydrofuran-3,4-diol (**20**)

#### Compound Table

| Label                          | Tgt Score | Mass Error (ppm) | Tgt Formula      | Obs. RT | Ref. Mass | Obs. Mass |
|--------------------------------|-----------|------------------|------------------|---------|-----------|-----------|
| Cpd 1: C22 H24 N6 O3 S2; 2.106 | 98.42     | 4.38             | C22 H24 N6 O3 S2 | 2.106   | 484.1351  | 484.1373  |

| Obs. <i>m/z</i> | Obs. RT | Obs. Mass | Tgt Formula      | Tgt Mass | Tgt Mass Error (ppm) | Find Cpd's Algorithm |
|-----------------|---------|-----------|------------------|----------|----------------------|----------------------|
| 507.1251        | 2.106   | 484.1373  | C22 H24 N6 O3 S2 | 484.1351 | 4.38                 | Find by Formula      |

#### Compound Chromatograms

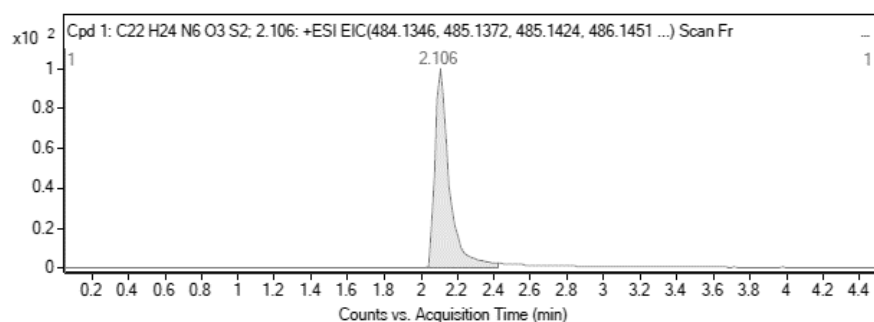

#### MS Zoomed Spectrum

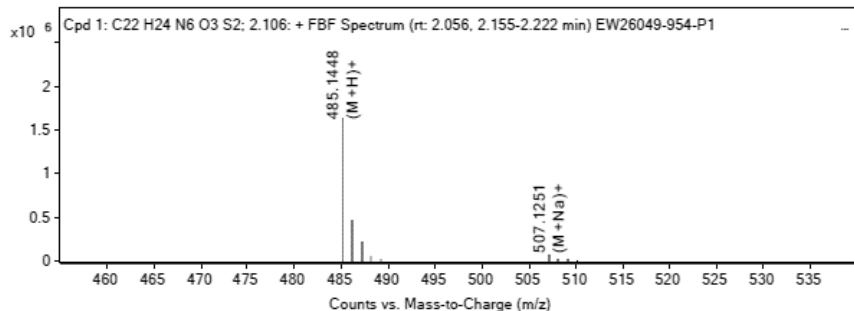

#### MS Spectrum Peak List

| Obs. <i>m/z</i> | Charge | Abund     | Ion/Isotope |
|-----------------|--------|-----------|-------------|
| 485.1448        | 1      | 1631015   | (M+H)+      |
| 486.1466        | 1      | 455562.72 | (M+H)+      |

|          |   |           |          |
|----------|---|-----------|----------|
| 487.1428 | 1 | 205090.11 | [(M+H)+  |
| 507.1251 | 1 | 62494.4   | [(M+Na)+ |
| 508.1276 | 1 | 17014.72  | [(M+Na)+ |
| 509.1246 | 1 | 8064.87   | [(M+Na)+ |
| 510.1248 | 1 | 1715.72   | [(M+Na)+ |

MS Zoomed Spectrum

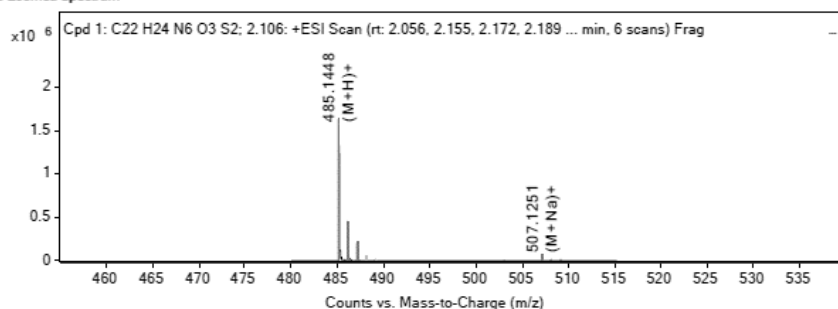

MS Spectrum Peak List

| Obs. m/z | Charge | Abund      | Ion/Isotope | Tgt Mass Error (ppm) |
|----------|--------|------------|-------------|----------------------|
| 485.1448 |        | 1631001.66 |             | -4.98                |
| 485.1448 | 1      | 1631015    | [(M+H)+     | -5                   |
| 486.1466 | 1      | 455562.72  | [(M+H)+     | -3.23                |
| 487.1428 | 1      | 205090.11  | [(M+H)+     | -3.13                |
| 507.1251 | 1      | 62494.4    | [(M+Na)+    | -1.57                |
| 508.1276 | 1      | 17014.72   | [(M+Na)+    | -1.18                |
| 509.1246 | 1      | 8064.87    | [(M+Na)+    | -2.67                |
| 510.1248 | 1      | 1715.72    | [(M+Na)+    | -0.75                |

--- End Of Report ---

**<sup>1</sup>H NMR (2S,3S,4R,5R)-2-((benzo[d]thiazol-2-ylthio)methyl)-5-(6-(isopropylamino)-9H-purin-9-yl)tetrahydrofuran-3,4-diol (**21**)**

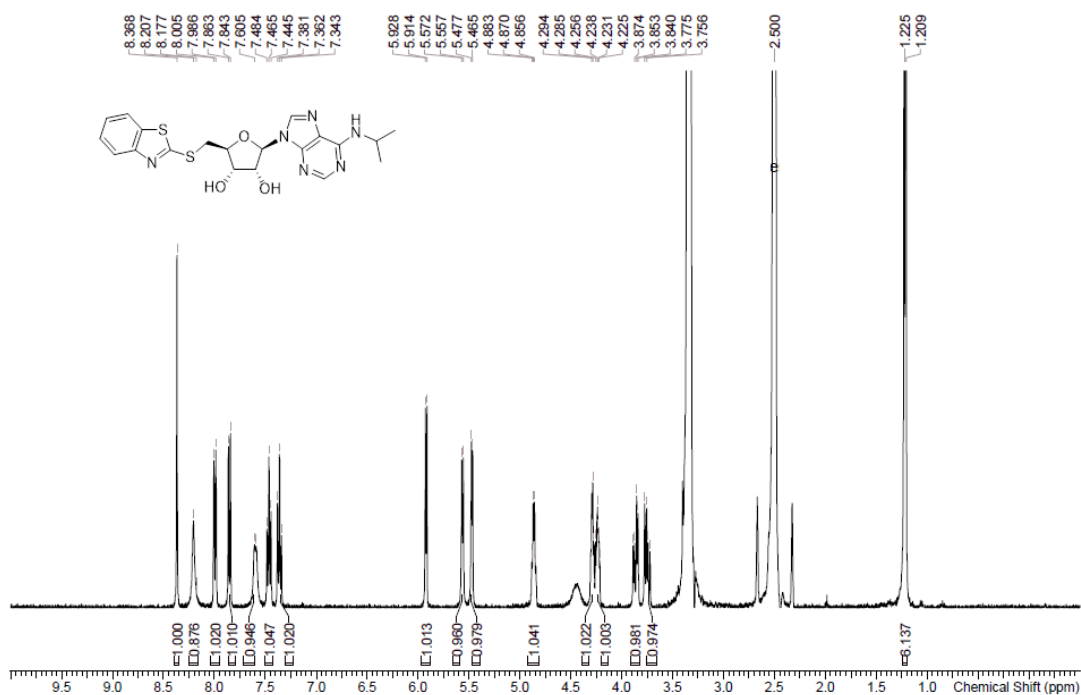

**HPLC (2S,3S,4R,5R)-2-((benzo[d]thiazol-2-ylthio)methyl)-5-(6-(isopropylamino)-9H-purin-9-yl)tetrahydrofuran-3,4-diol (**21**)**

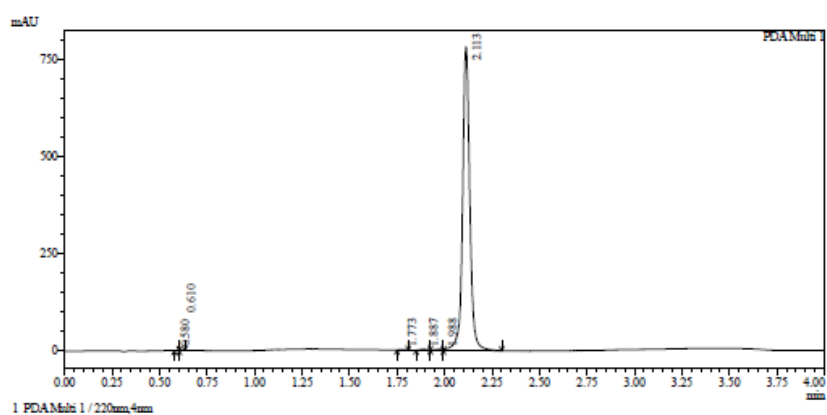

Integration result

| PeakTable |           |           |            |        |         |         |
|-----------|-----------|-----------|------------|--------|---------|---------|
| Peak#     | Ret. Time | USP Width | Resolution | Height | Area    | Area %  |
| 1         | 0.580     | 0.105     | 0.000      | 1047   | 1749    | 0.084   |
| 2         | 0.610     | 0.083     | 0.322      | 1237   | 1869    | 0.090   |
| 3         | 1.773     | 0.070     | 15.234     | 1507   | 3648    | 0.175   |
| 4         | 1.887     | 0.071     | 1.620      | 2577   | 6517    | 0.312   |
| 5         | 1.988     | 0.112     | 1.106      | 3452   | 8442    | 0.405   |
| 6         | 2.113     | 0.066     | 1.399      | 781817 | 2063561 | 98.934  |
| Total     |           |           |            | 791636 | 2085786 | 100.000 |

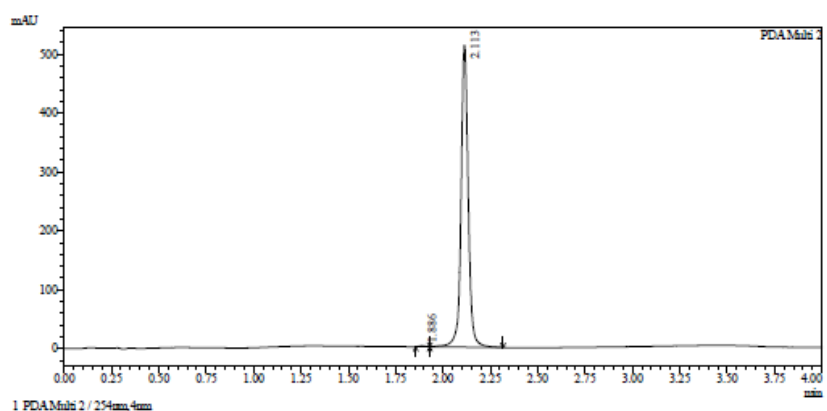

Integration result

| PeakTable |           |           |            |        |         |         |
|-----------|-----------|-----------|------------|--------|---------|---------|
| Peak#     | Ret. Time | USP Width | Resolution | Height | Area    | Area %  |
| 1         | 1.886     | 0.065     | 0.000      | 1655   | 3797    | 0.278   |
| 2         | 2.113     | 0.066     | 3.452      | 513140 | 1359565 | 99.722  |
| Total     |           |           |            | 514794 | 1363362 | 100.000 |

**HRMS** (2S,3S,4R,5R)-2-((benzo[d]thiazol-2-ylthio)methyl)-5-(6-(isopropylamino)-9H-purin-9-yl)tetrahydrofuran-3,4-diol (**21**)

Compound Table

| Label                          | Tgt Score | Mass Error (ppm) | Tgt Formula      | Obs. RT | Ref. Mass | Obs. Mass |
|--------------------------------|-----------|------------------|------------------|---------|-----------|-----------|
| Cpd 1: C20 H22 N6 O3 S2; 1.966 | 96.29     | 4.56             | C20 H22 N6 O3 S2 | 1.966   | 458.1195  | 458.1216  |

| Obs. m/z | Obs. RT | Obs. Mass | Tgt Formula      | Tgt Mass | Tgt Mass Error (ppm) | Find Cpd's Algorithm |
|----------|---------|-----------|------------------|----------|----------------------|----------------------|
| 481.1097 | 1.966   | 458.1216  | C20 H22 N6 O3 S2 | 458.1195 | 4.56                 | Find by Formula      |

Compound Chromatograms

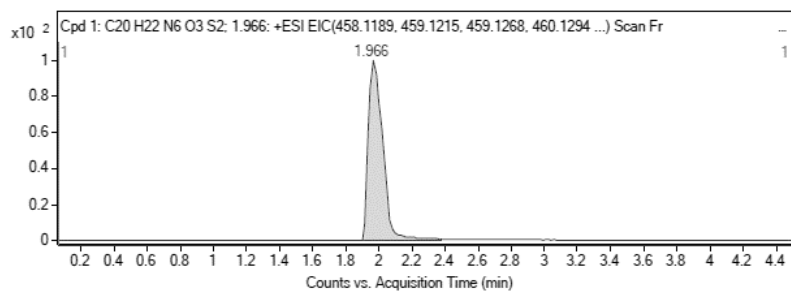

MS Zoomed Spectrum

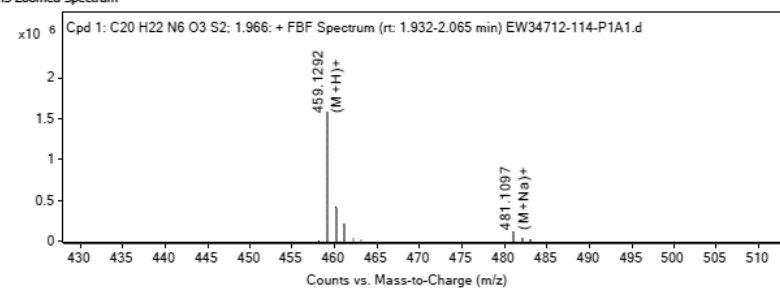

MS Spectrum Peak List

| Obs. m/z | Charge | Abund   | Ion/Isotope |
|----------|--------|---------|-------------|
| 458.1155 | 1      | 571.2   | M+          |
| 459.1292 | 1      | 1586056 | (M+H)+      |

|          |   |           |         |
|----------|---|-----------|---------|
| 460.131  | 1 | 420726.25 | (M+H)+  |
| 461.1268 | 1 | 196635.44 | (M+H)+  |
| 481.1097 | 1 | 117045.18 | (M+Na)+ |
| 482.1119 | 1 | 29380.34  | (M+Na)+ |
| 483.1077 | 1 | 13929.76  | (M+Na)+ |

MS Zoomed Spectrum

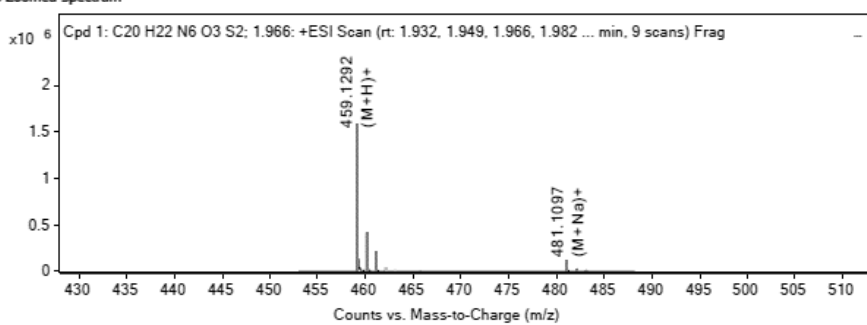

MS Spectrum Peak List

| Obs. m/z | Charge | Abund      | Ion/Isotope | Tgt Mass Error (ppm) |
|----------|--------|------------|-------------|----------------------|
| 458.1155 | 1      | 571.2      | M+          | 7.41                 |
| 459.1292 | 1      | 1585992.68 |             | -5.27                |
| 459.1292 | 1      | 1586056    | (M+H)+      | -5.28                |
| 460.131  | 1      | 420726.25  | (M+H)+      | -3.45                |
| 461.1268 | 1      | 196635.44  | (M+H)+      | -3.17                |
| 481.1097 | 1      | 117045.18  | (M+Na)+     | -2.09                |
| 482.1119 | 1      | 29380.34   | (M+Na)+     | -1.17                |
| 483.1077 | 1      | 13929.76   | (M+Na)+     | -0.94                |

--- End Of Report ---

**<sup>1</sup>H NMR (2S,3S,4R,5R)-2-(1,3-Benzothiazol-2-ylsulfanylmethyl)-5- [6-(oxetan-3-ylamino)purin-9-yl]tetrahydrofuran-3,4-diol (**22**)**

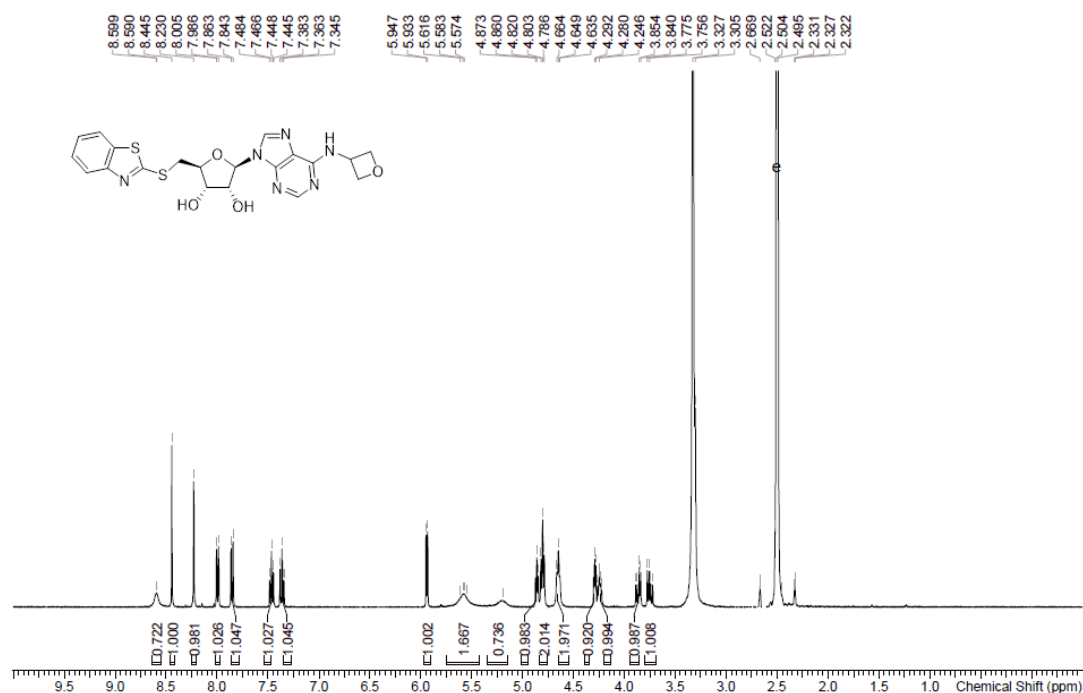

**HPLC (2S,3S,4R,5R)-2-(1,3-Benzothiazol-2-ylsulfanylmethyl)-5- [6-(oxetan-3-ylamino)purin-9-yl]tetrahydrofuran-3,4-diol (**22**)**

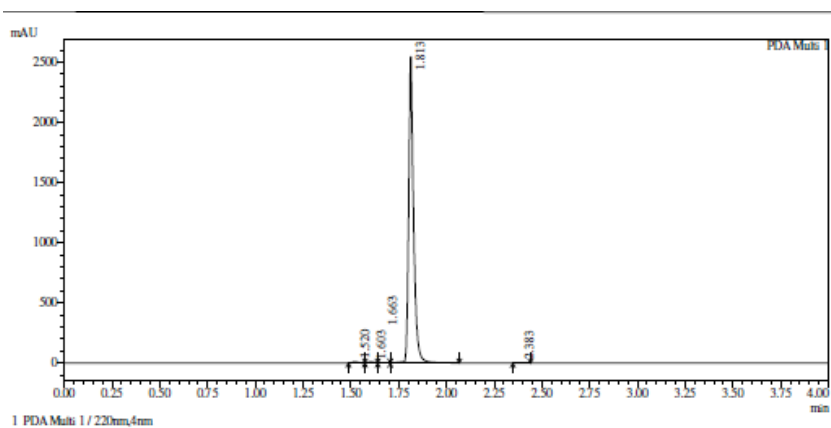

Integration result

| PDA Ch1 220nm |           | PeakTable |            |         |         |         |
|---------------|-----------|-----------|------------|---------|---------|---------|
| Peak#         | Ret. Time | USPWidth  | Resolution | Height  | Area    | Area %  |
| 1             | 1.520     | 0.052     | 0.000      | 11404   | 22626   | 0.494   |
| 2             | 1.603     | 0.057     | 1.524      | 11345   | 24466   | 0.534   |
| 3             | 1.663     | 0.107     | 0.719      | 4431    | 11797   | 0.258   |
| 4             | 1.813     | 0.046     | 1.966      | 2546174 | 4515952 | 98.617  |
| 5             | 2.383     | 0.065     | 10.284     | 1856    | 4454    | 0.097   |
| Total         |           |           |            | 2575210 | 4579296 | 100.000 |

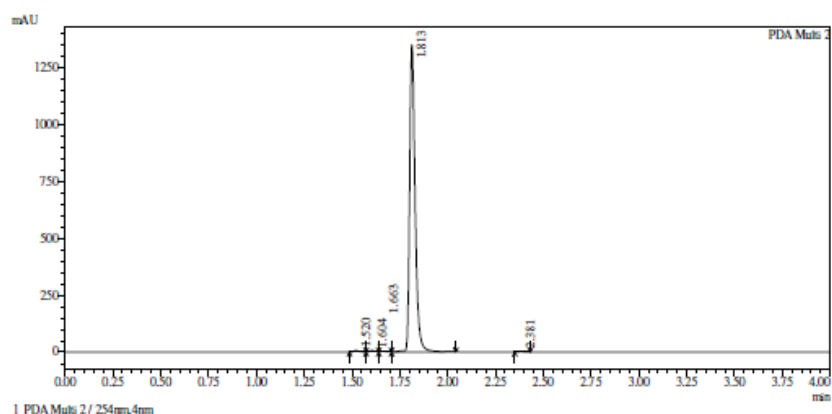

#### Integration result

| PDA Ch2 254nm |           | PeakTable |            |         |         |         |
|---------------|-----------|-----------|------------|---------|---------|---------|
| Peak#         | Ret. Time | USP Width | Resolution | Height  | Area    | Area %  |
| 1             | 1.520     | 0.052     | 0.000      | 6786    | 13329   | 0.487   |
| 2             | 1.604     | 0.057     | 1.530      | 6548    | 13936   | 0.509   |
| 3             | 1.663     | 0.097     | 0.776      | 2985    | 7865    | 0.287   |
| 4             | 1.813     | 0.052     | 2.010      | 1352967 | 2699705 | 98.628  |
| 5             | 2.381     | 0.062     | 9.987      | 1058    | 2433    | 0.089   |
| Total         |           |           |            | 1370343 | 2737267 | 100.000 |

**HRMC (2S,3S,4R,5R)-2-(1,3-Benzothiazol-2-ylsulfanylmethyl)-5- [6-(oxetan-3-ylamino)purin-9-yl]tetrahydrofuran-3,4-diol (**22**)**

#### Compound Table

| Label                          | Tgt Score | Mass Error (ppm) | Tgt Formula      | Obs. RT | Ref. Mass | Obs. Mass |
|--------------------------------|-----------|------------------|------------------|---------|-----------|-----------|
| Cpd 1: C20 H20 N6 O4 S2; 1.901 | 93.11     | 6.11             | C20 H20 N6 O4 S2 | 1.901   | 472.0987  | 472.1016  |

| Obs. m/z | Obs. RT | Obs. Mass | Tgt Formula      | Tgt Mass | Tgt Mass Error (ppm) | Find Cpd's Algorithm |
|----------|---------|-----------|------------------|----------|----------------------|----------------------|
| 495.0896 | 1.901   | 472.1016  | C20 H20 N6 O4 S2 | 472.0987 | 6.11                 | Find by Formula      |

#### Compound Chromatograms

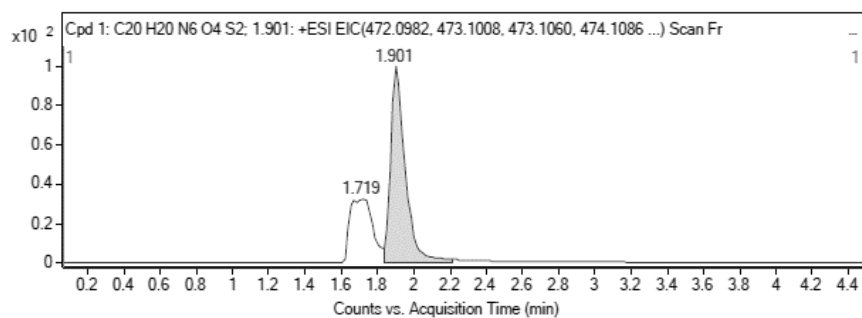

#### MS Zoomed Spectrum

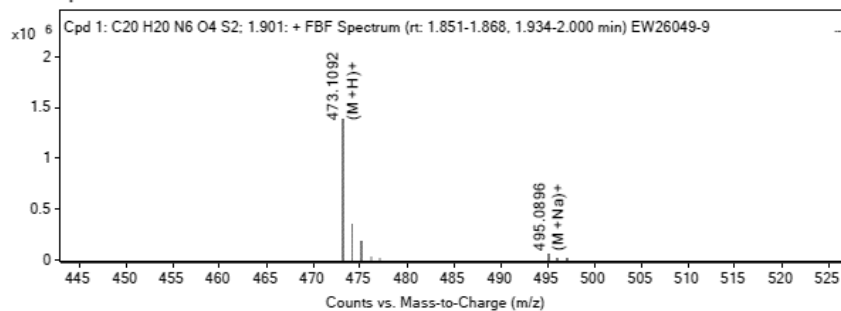

#### MS Spectrum Peak List

| Obs. m/z | Charge | Abund      | [Ion/Isotope] |
|----------|--------|------------|---------------|
| 473.1092 | 1      | 1384917.88 | [(M+H)+]      |
| 474.111  | 1      | 352973.34  | [(M+H)+]      |

|          |   |           |         |
|----------|---|-----------|---------|
| 475.1063 | 1 | 170793.89 | (M+H)+  |
| 495.0896 | 1 | 61714.53  | (M+Na)+ |
| 496.0916 | 1 | 15825.19  | (M+Na)+ |
| 497.0886 | 1 | 7490.06   | (M+Na)+ |

MS Zoomed Spectrum

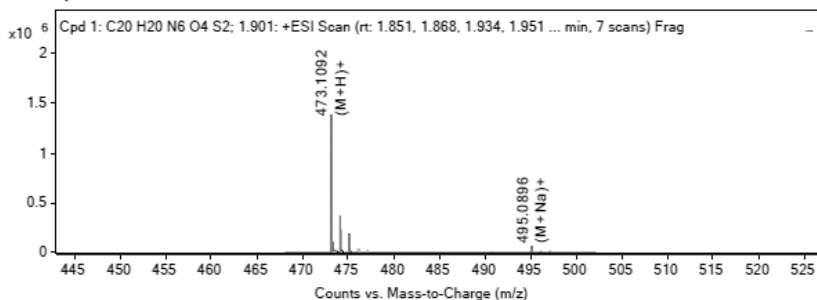

MS Spectrum Peak List

| Obs. m/z | Charge | Abund      | Ion/Isotope | Tgt Mass Error (ppm) |
|----------|--------|------------|-------------|----------------------|
| 473.1092 |        | 1384897.09 |             | -6.7                 |
| 473.1092 | 1      | 1384917.88 | (M+H)+      | -6.71                |
| 474.111  | 1      | 352973.34  | (M+H)+      | -5.04                |
| 475.1063 | 1      | 170793.89  | (M+H)+      | -4.72                |
| 495.0896 | 1      | 61714.53   | (M+Na)+     | -3.23                |
| 496.0916 | 1      | 15825.19   | (M+Na)+     | -2.05                |
| 497.0886 | 1      | 7490.06    | (M+Na)+     | -3.94                |

--- End Of Report ---

**LCMS (2S,3R,4R,5R)-3,4-Bis[[tert-butyl(dimethyl)silyl]oxy]-5- (6-chloropurin-9-yl)tetrahydrofuran-2-carbaldehyde (47)**

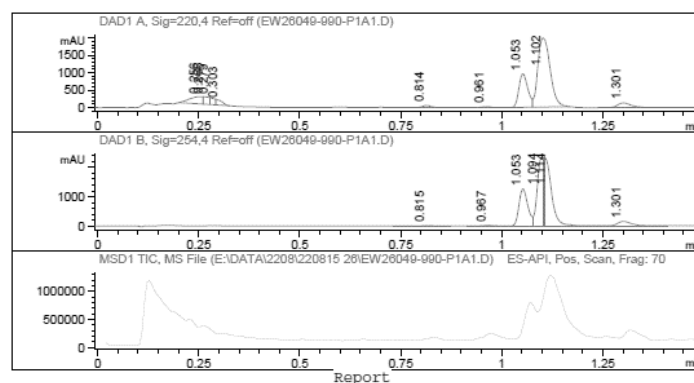

=====  
Signal 1 : DAD1 A, Sig=220,4 Ref=off

| # | Meas. Ret. | Height   | Width | Area     | Area % |
|---|------------|----------|-------|----------|--------|
| 1 | 0.256      | 210.044  | 0.037 | 459.425  | 6.435  |
| 2 | 0.266      | 211.443  | 0.015 | 206.461  | 2.892  |
| 3 | 0.279      | 191.610  | 0.014 | 159.638  | 2.236  |
| 4 | 0.303      | 130.858  | 0.018 | 160.967  | 2.255  |
| 5 | 0.814      | 55.720   | 0.022 | 79.615   | 1.115  |
| 6 | 0.961      | 23.491   | 0.025 | 37.717   | 0.528  |
| 7 | 1.053      | 961.657  | 0.023 | 1471.560 | 20.611 |
| 8 | 1.102      | 1981.939 | 0.033 | 4216.002 | 59.051 |
| 9 | 1.301      | 136.826  | 0.038 | 348.233  | 4.877  |

Signal 2 : DAD1 B, Sig=254,4 Ref=off

| # | Meas. Ret. | Height   | Width | Area     | Area % |
|---|------------|----------|-------|----------|--------|
| 1 | 0.815      | 17.101   | 0.033 | 39.699   | 0.519  |
| 2 | 0.967      | 23.487   | 0.026 | 42.230   | 0.552  |
| 3 | 1.053      | 1259.189 | 0.023 | 1903.633 | 24.898 |
| 4 | 1.094      | 2148.858 | 0.017 | 2478.554 | 32.418 |
| 5 | 1.114      | 2063.032 | 0.022 | 2772.413 | 36.261 |
| 6 | 1.301      | 153.644  | 0.039 | 409.161  | 5.352  |

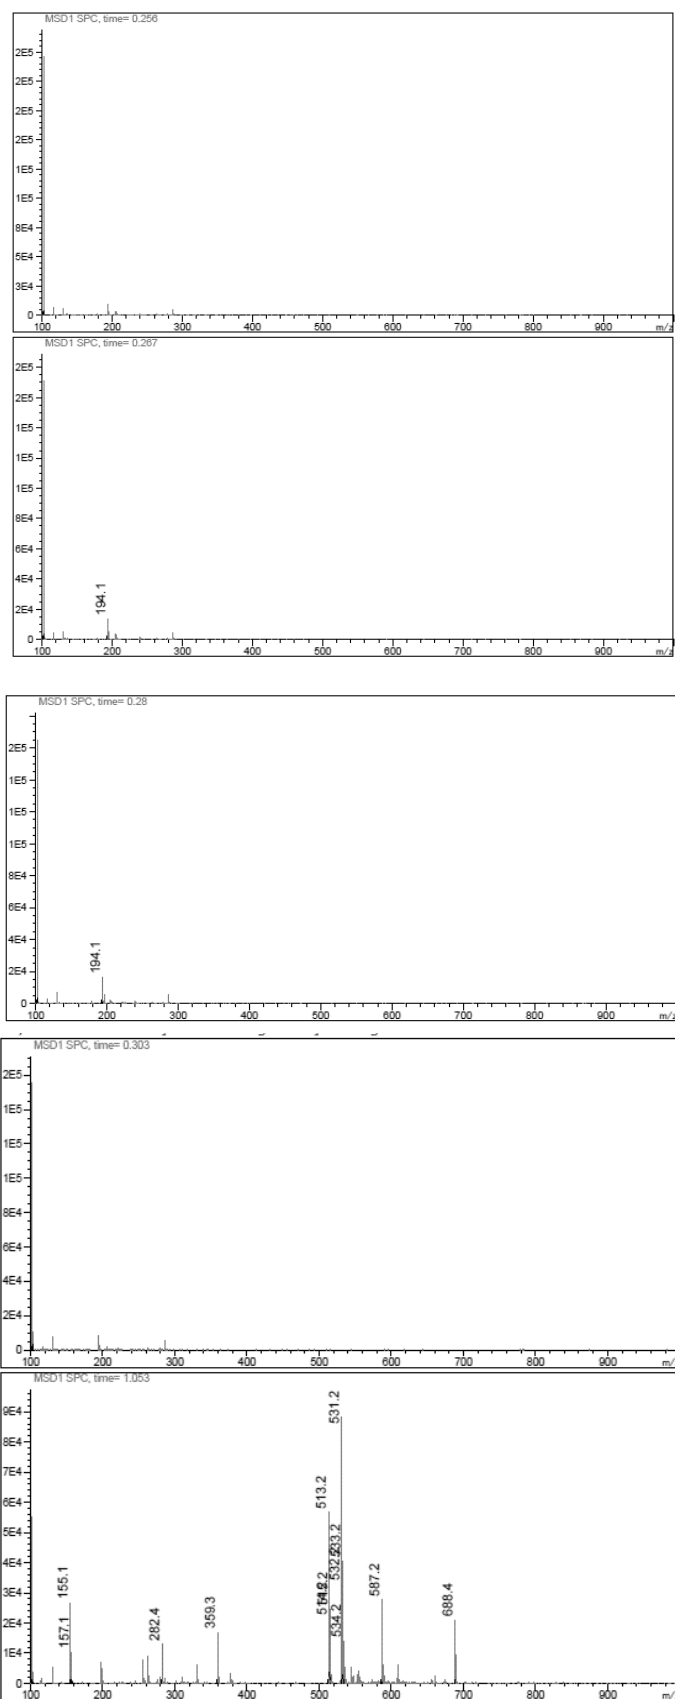



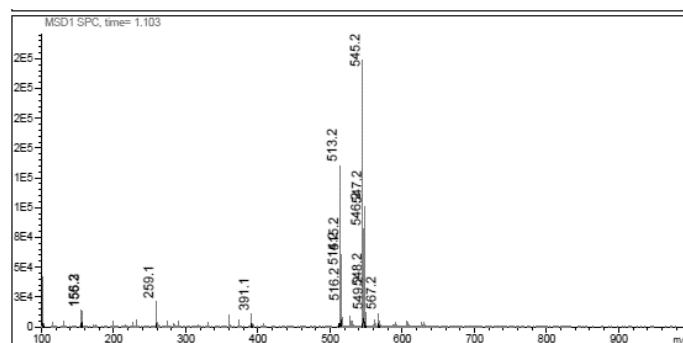

$^1\text{H NMR}$  [(2*R*,3*R*,4*R*,5*R*)-2-[(*E*)-2-(1,3-Benzothiazol-2-yl)vinyl]-4-[tert-butyl (dimethyl)silyl]oxy-5-(6-chloropurin-9-yl)tetrahydrofuran-3-yl]oxy-tert-butyl-dimethyl-silane (**48**)

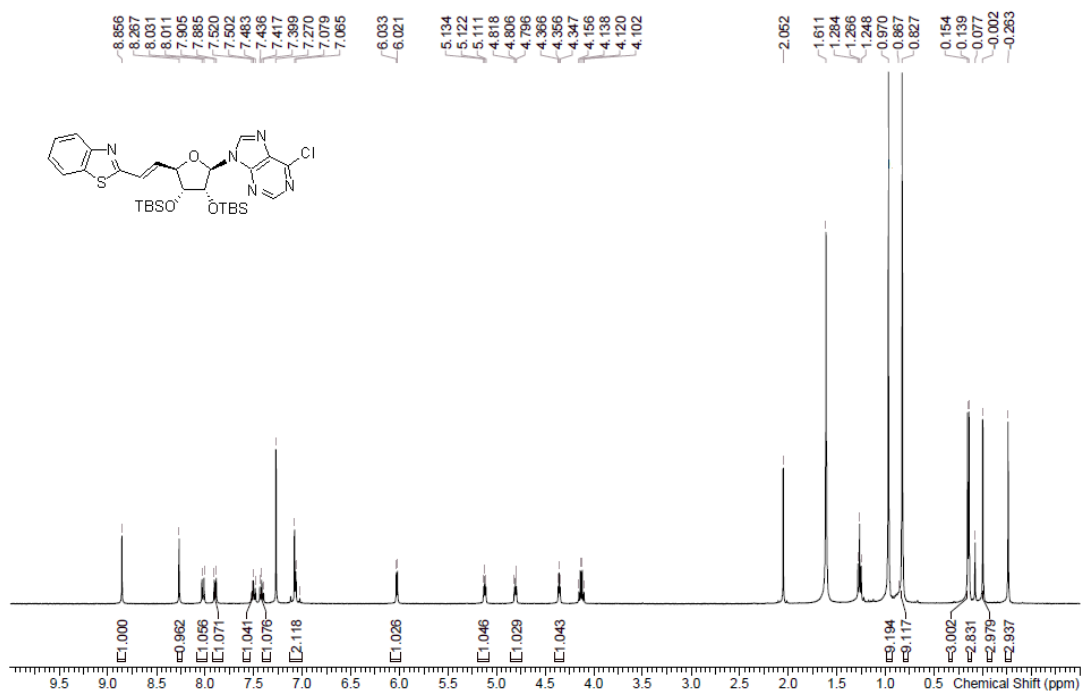

**LCMS** [(2*R*,3*R*,4*R*,5*R*)-2-[(*E*)-2-(1,3-Benzothiazol-2-yl)vinyl]-4-[tert-butyl (dimethyl)silyl]oxy-5-(6-chloropurin-9-yl)tetrahydrofuran-3-yl]oxy-tert-butyl-dimethyl-silane (**48**)

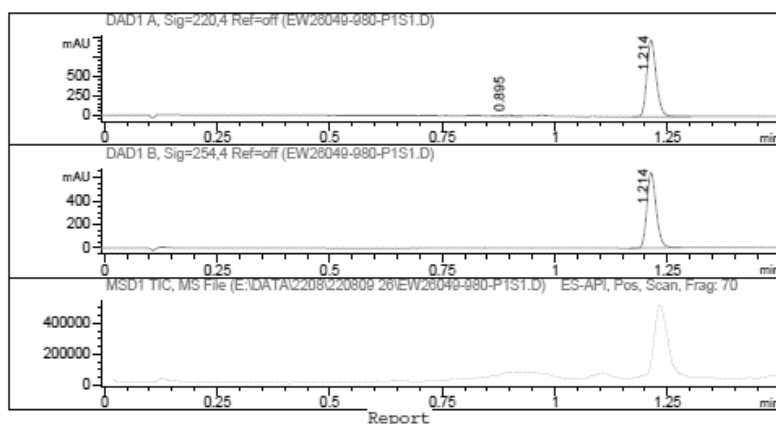

```

=====
Signal 1 : DAD1 A, Sig=220,4 Ref=off
# Meas. Ret. Height Width Area Area %
-----
1 0.895 15.259 0.028 29.316 2.000
2 1.214 987.105 0.022 1436.830 98.000
-----

Signal 2 : DAD1 B, Sig=254,4 Ref=off
# Meas. Ret. Height Width Area Area %
-----
1 1.214 641.980 0.022 923.254 100.000
-----
  
```

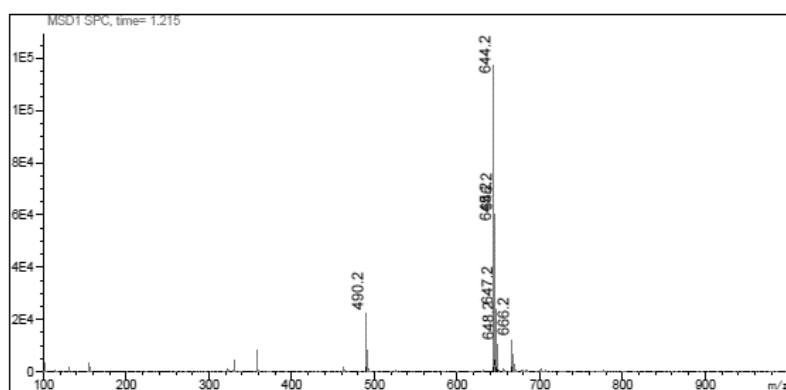

**LCMS 9-[(2*R*,3*R*,4*R*,5*R*)-5-[(*E*)-2-(1,3-Benzothiazol-2-yl)vinyl]-3,4-bis [[tert-butyl(dimethyl)silyl]oxy]tetrahydrofuran-2-yl]purin-6-amine (**49**)**

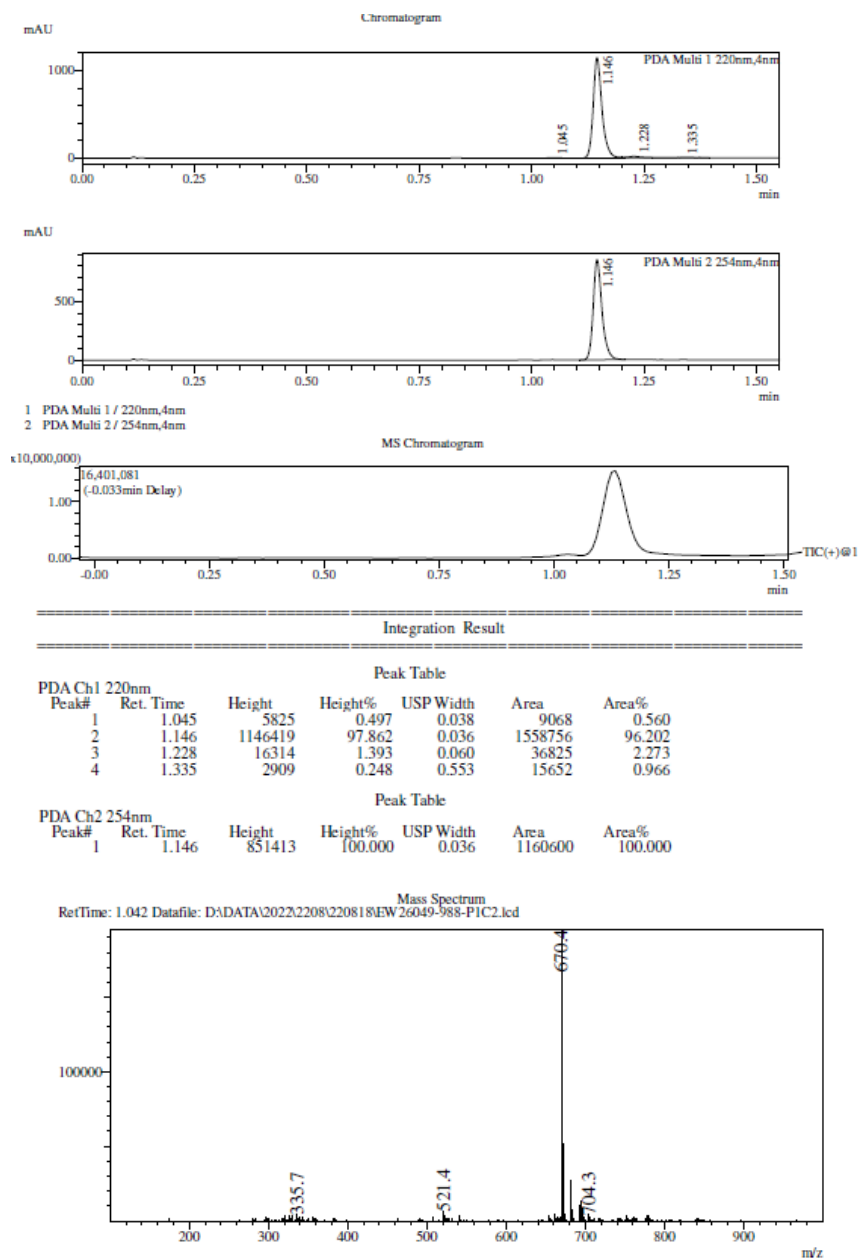

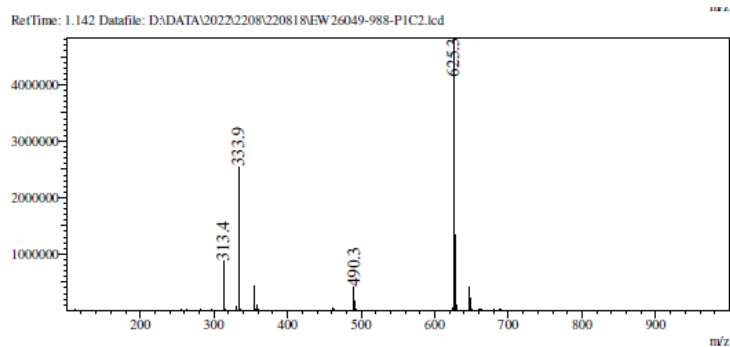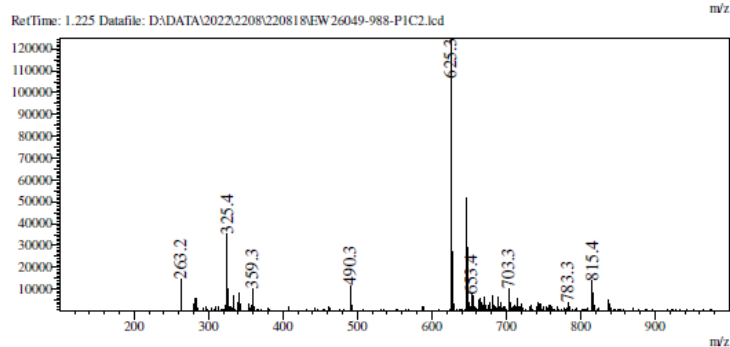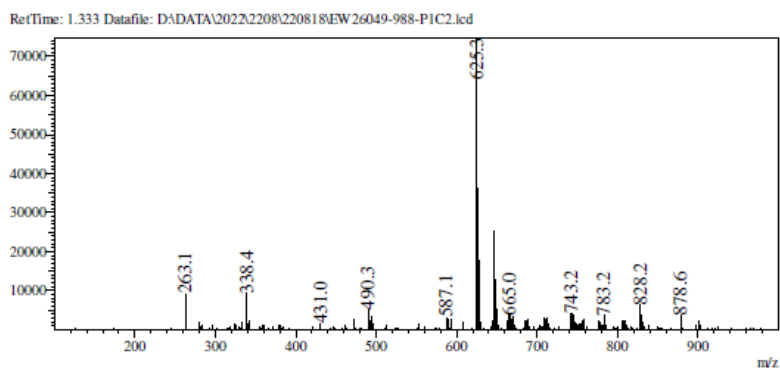

**<sup>1</sup>H NMR (2*R*,3*R*,4*S*,5*R*)-2-(6-Aminopurin-9-yl)-5-[(*E*)-2-(1,3-benzothiazol-2-yl) vinyl]tetrahydrofuran-3,4-diol (**33**)**

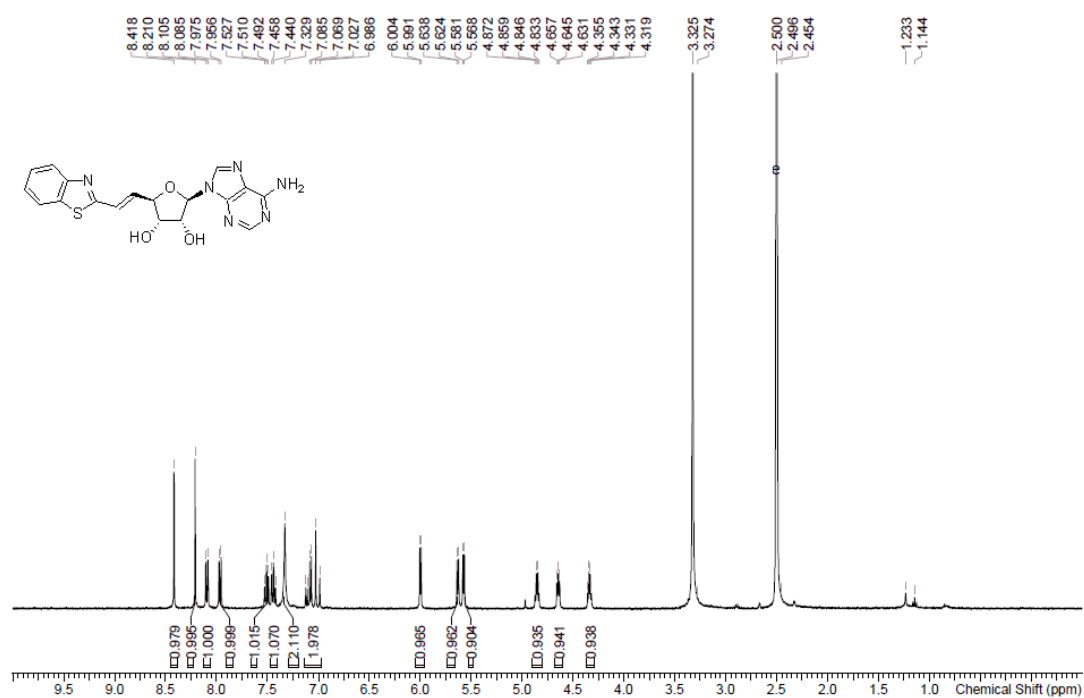

**HPLC (2*R*,3*R*,4*S*,5*R*)-2-(6-Aminopurin-9-yl)-5-[(*E*)-2-(1,3-benzothiazol-2-yl) vinyl]tetrahydrofuran-3,4-diol (**33**)**

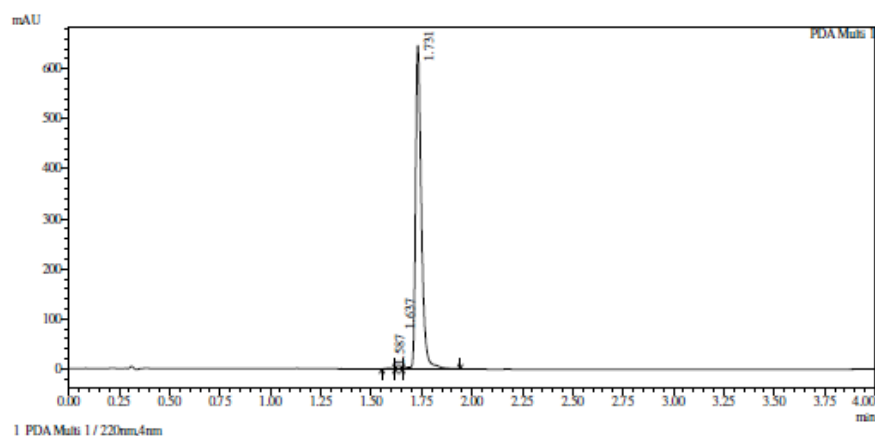

Integration result

| PeakTable |           |           |            |        |         |         |
|-----------|-----------|-----------|------------|--------|---------|---------|
| Peak#     | Ret. Time | USP Width | Resolution | Height | Area    | Area %  |
| 1         | 1.587     | 0.053     | 0.000      | 1563   | 3091    | 0.237   |
| 2         | 1.637     | 0.100     | 0.662      | 1055   | 1736    | 0.133   |
| 3         | 1.731     | 0.051     | 1.238      | 647135 | 1300375 | 99.630  |
| Total     |           |           |            | 649752 | 1305202 | 100.000 |

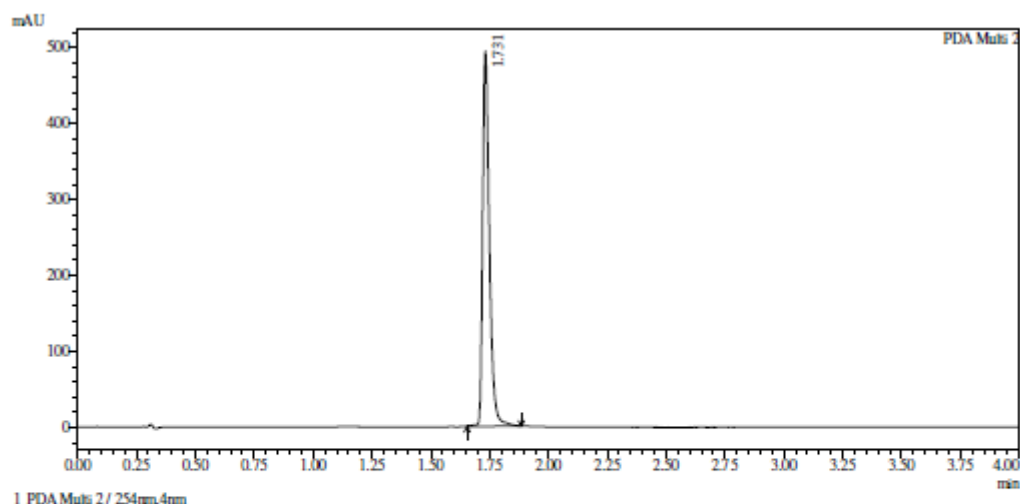

#### Integration result

| PeakTable     |           |           |            |        |        |         |
|---------------|-----------|-----------|------------|--------|--------|---------|
| PDA Ch2 254nm |           |           |            |        |        |         |
| Peak#         | Ret. Time | USP Width | Resolution | Height | Area   | Area %  |
| 1             | 1.731     | 0.051     | 0.000      | 494603 | 984589 | 100.000 |
| Total         |           |           |            | 494603 | 984589 | 100.000 |

**HRMC (2*R*,3*R*,4*S*,5*R*)-2-(6-Aminopurin-9-yl)-5-[(*E*)-2-(1,3-benzothiazol-2-yl) vinyl]tetrahydrofuran-3,4-diol (**33**)**

#### Compound Table

| Label                         | Tgt Score | Mass Error (ppm) | Tgt Formula     | Obs. RT | Ref. Mass | Obs. Mass |
|-------------------------------|-----------|------------------|-----------------|---------|-----------|-----------|
| Cpd 1: C18 H16 N6 O3 S; 1.768 | 99.29     | 3.28             | C18 H16 N6 O3 S | 1.768   | 396.1005  | 396.1018  |

| Obs. <i>m/z</i> | Obs. RT | Obs. Mass | Tgt Formula     | Tgt Mass | Tgt Mass Error (ppm) | Find Cps Algorithm |
|-----------------|---------|-----------|-----------------|----------|----------------------|--------------------|
| 419.0899        | 1.768   | 396.1018  | C18 H16 N6 O3 S | 396.1005 | 3.28                 | Find by Formula    |

#### Compound Chromatograms

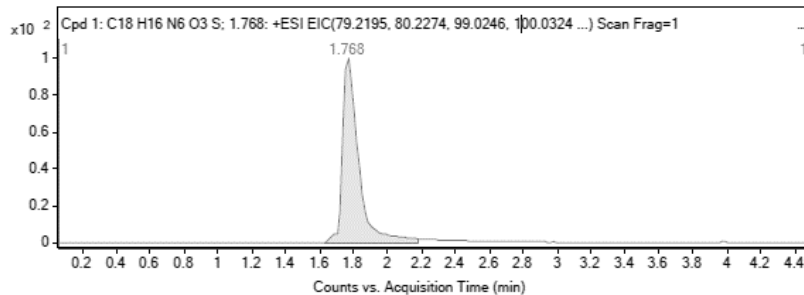

#### MS Zoomed Spectrum

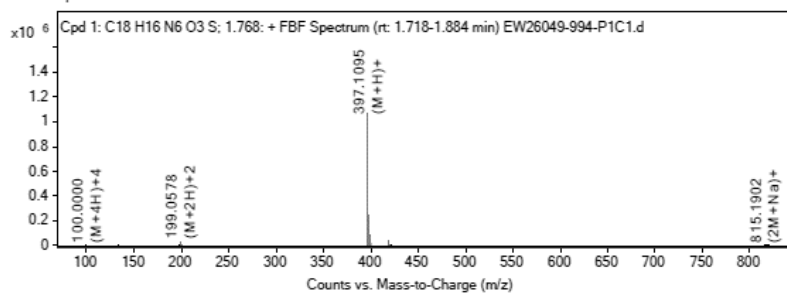

#### MS Spectrum Peak List

| Obs. <i>m/z</i> | Charge | Abund    | Ion/Isotope |
|-----------------|--------|----------|-------------|
| 199.0578        | 2      | 29187.99 | (M+2H)+2    |
| 199.559         | 2      | 7087.75  | (M+2H)+2    |

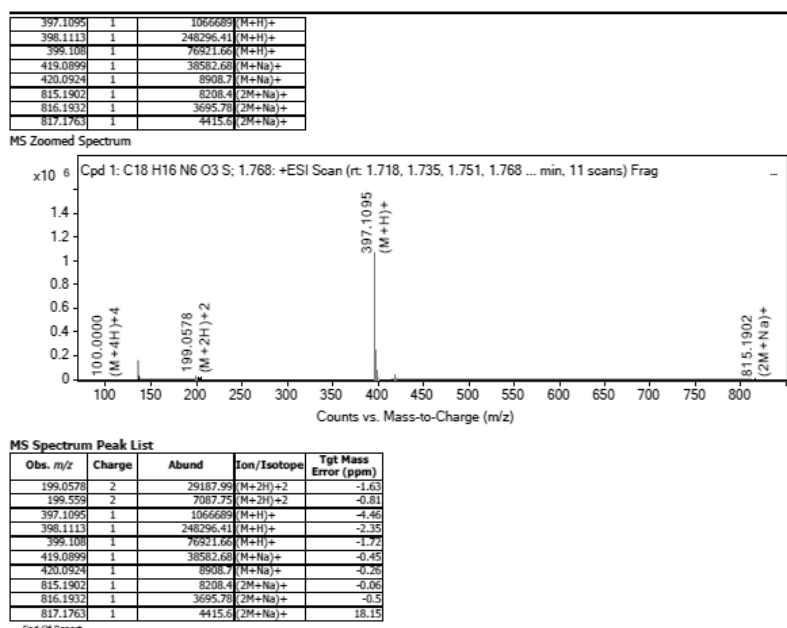

**<sup>1</sup>H NMR** 9-[(2*R*,3*R*,4*R*,5*R*)-5-[2-(1,3-Benzothiazol-2-yl)ethyl]-3,4-bis [[tert-butyl(dimethyl)silyl]oxy] tetrahydrofuran-2-yl]purin-6-amine (**50**)

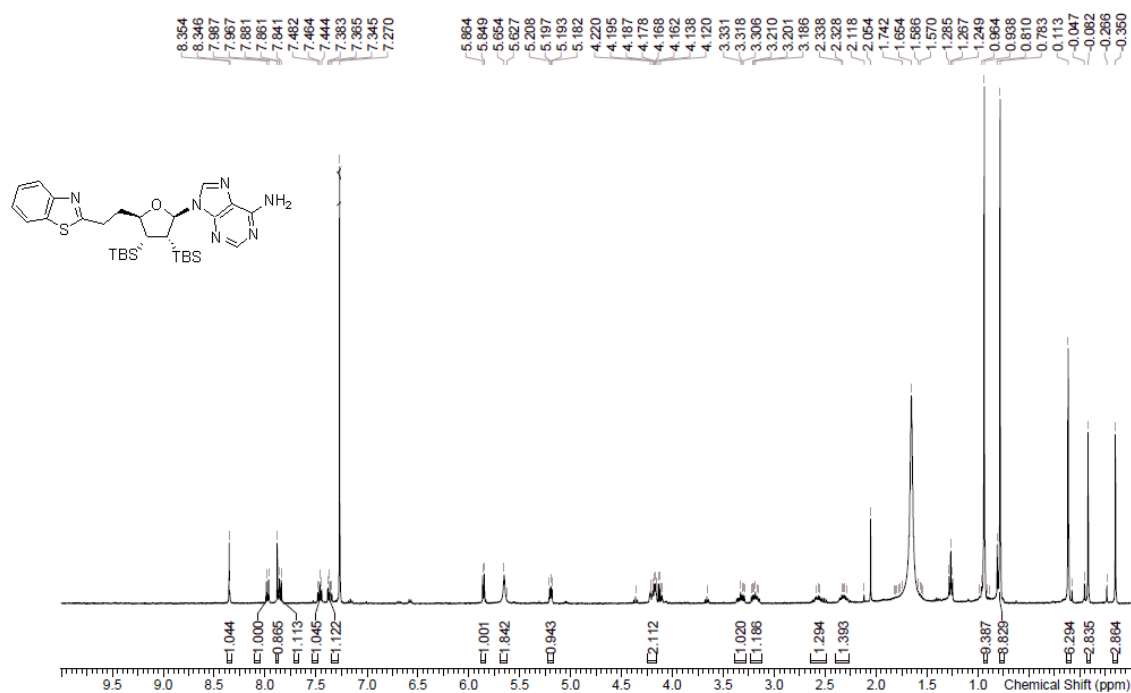

**LCMS 9-[(2*R*,3*R*,4*R*,5*R*)-5-[2-(1,3-Benzothiazol-2-yl)ethyl]-3,4-bis [[tert-butyl(dimethyl)silyl]oxy]tetrahydrofuran-2-yl]purin-6-amine (50)**

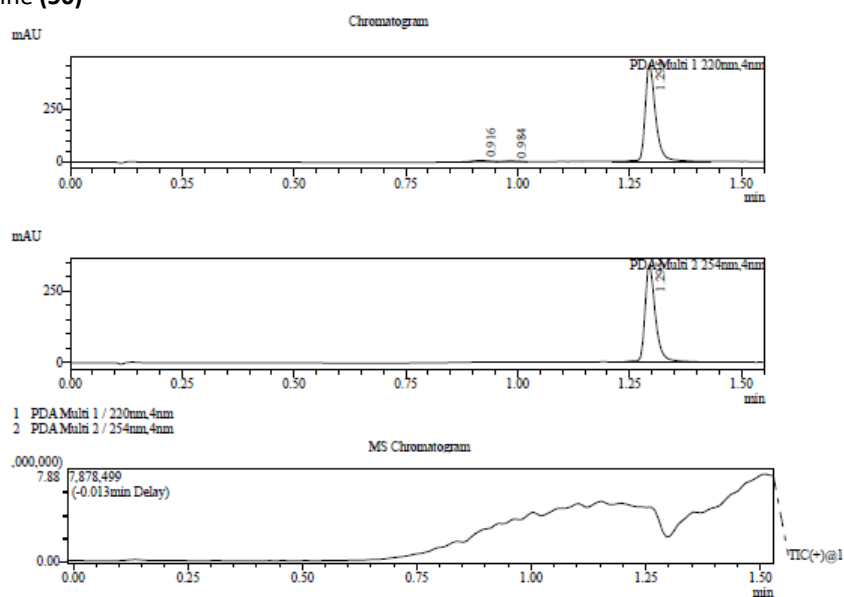

| Integration Result |           |        |         |           |        |         |
|--------------------|-----------|--------|---------|-----------|--------|---------|
| Peak Table         |           |        |         |           |        |         |
| PDA Ch1 220nm      |           |        |         |           |        |         |
| Peak#              | Ret. Time | Height | Height% | USP Width | Area   | Area%   |
| 1                  | 0.916     | 6607   | 1.397   | 0.081     | 18435  | 2.442   |
| 2                  | 0.984     | 3107   | 0.657   | 0.055     | 5752   | 0.762   |
| 3                  | 1.295     | 463329 | 97.947  | 0.046     | 730841 | 96.797  |
| Peak Table         |           |        |         |           |        |         |
| PDA Ch2 254nm      |           |        |         |           |        |         |
| Peak#              | Ret. Time | Height | Height% | USP Width | Area   | Area%   |
| 1                  | 1.295     | 342660 | 100.000 | 0.046     | 547623 | 100.000 |

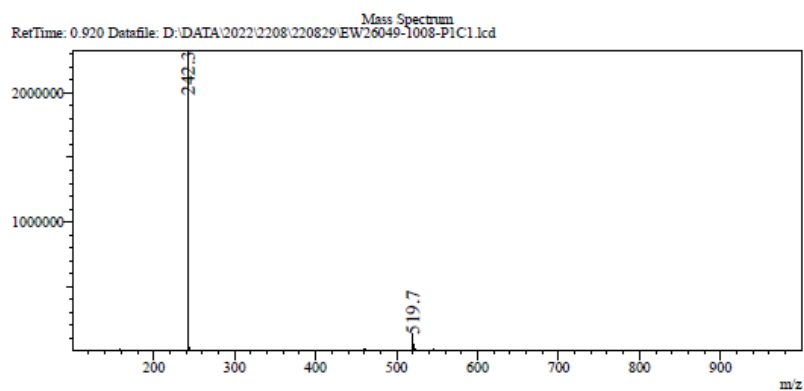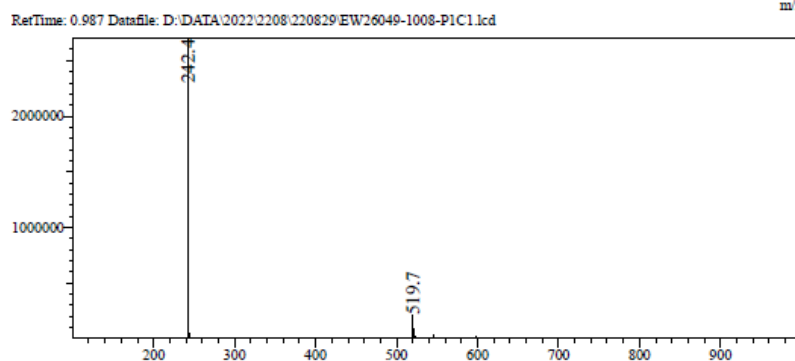



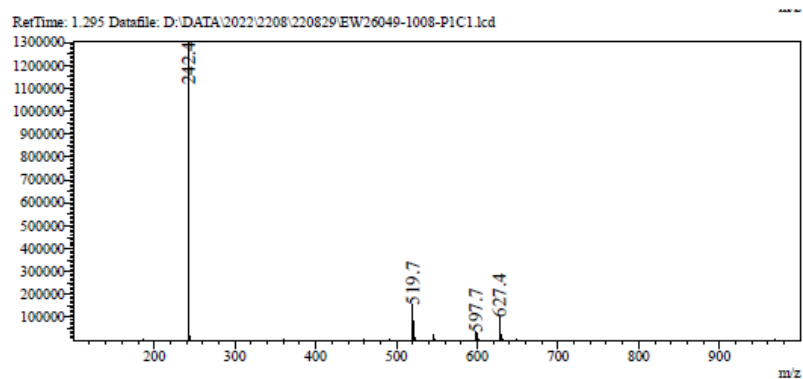

$^1\text{H}$  NMR (2*R*,3*R*,4*S*,5*R*)-2-(6-Aminopurin-9-yl)-5-[2-(1,3-benzothiazol-2-yl) ethyl]tetrahydrofuran-3,4-diol (**25**)

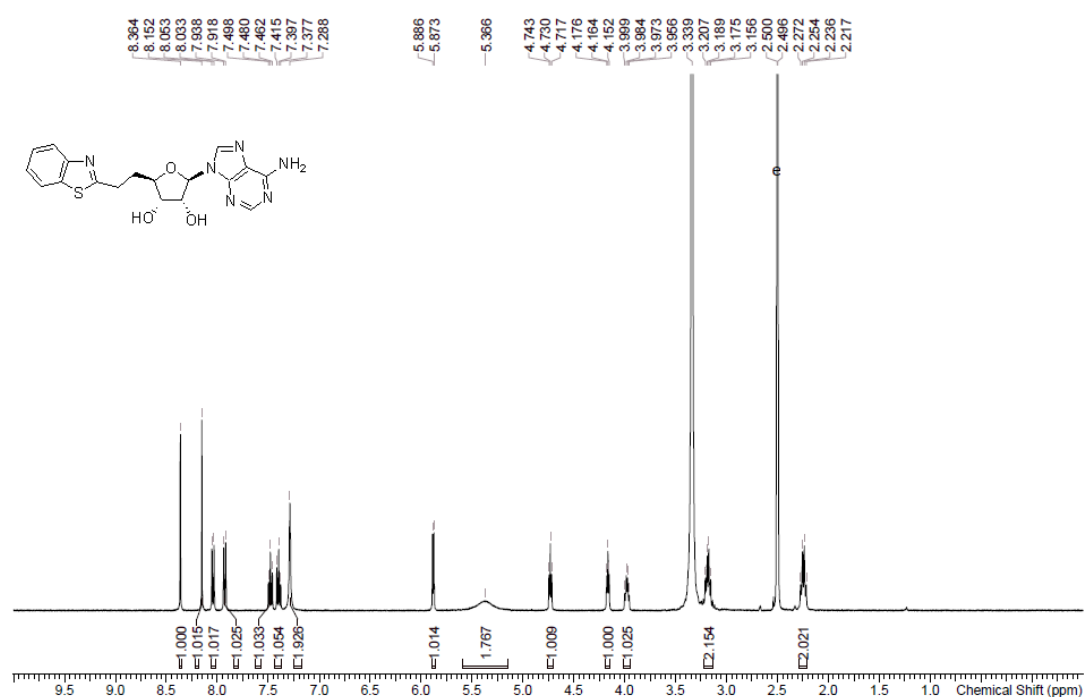

# HPLC (2*R*,3*R*,4*S*,5*R*)-2-(6-Aminopurin-9-yl)-5-[2-(1,3-benzothiazol-2-yl) ethyl]tetrahydrofuran-3,4-diol (**25**)

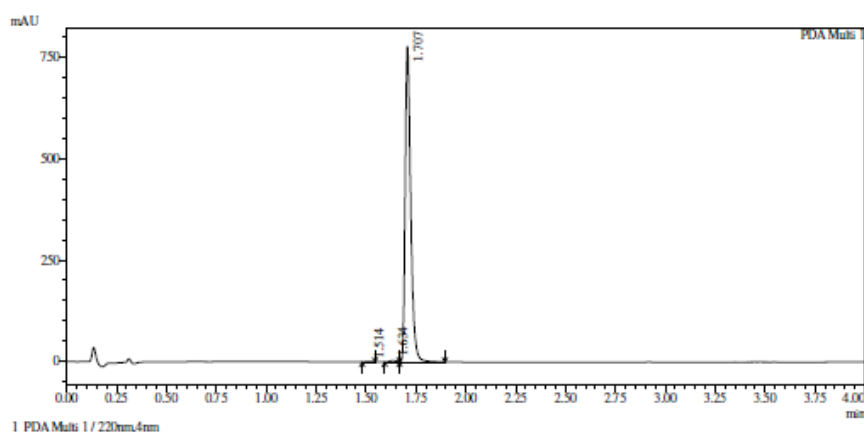

## Integration result

| PeakTable     |           |           |            |        |         |         |
|---------------|-----------|-----------|------------|--------|---------|---------|
| PDA Ch1 220nm |           |           |            |        |         |         |
| Peak#         | Ret. Time | USP Width | Resolution | Height | Area    | Area %  |
| 1             | 1.514     | 0.103     | 0.000      | 1264   | 3218    | 0.211   |
| 2             | 1.634     | 0.077     | 1.345      | 3528   | 9421    | 0.618   |
| 3             | 1.707     | 0.051     | 1.137      | 778638 | 1511865 | 99.171  |
| Total         |           |           |            | 783431 | 1524505 | 100.000 |

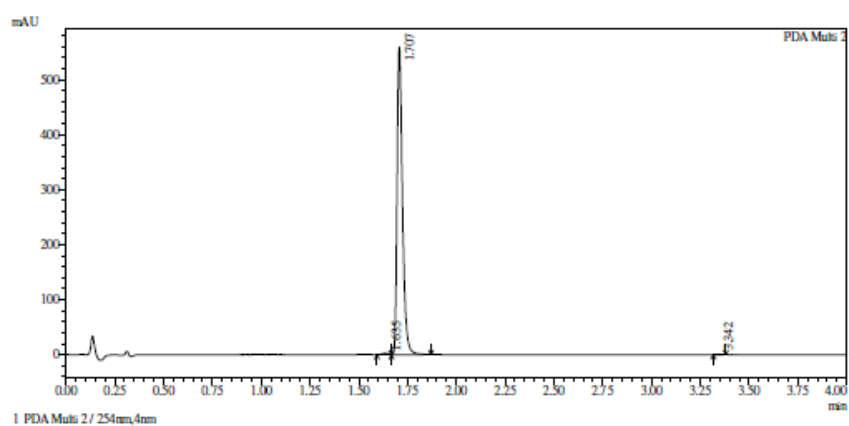

## Integration result

| PeakTable     |           |           |            |        |         |         |
|---------------|-----------|-----------|------------|--------|---------|---------|
| PDA Ch2 254nm |           |           |            |        |         |         |
| Peak#         | Ret. Time | USP Width | Resolution | Height | Area    | Area %  |
| 1             | 1.635     | 0.077     | 0.000      | 2550   | 6858    | 0.629   |
| 2             | 1.707     | 0.051     | 1.122      | 559197 | 1081077 | 99.229  |
| 3             | 3.342     | 0.052     | 31.750     | 822    | 1547    | 0.142   |
| Total         |           |           |            | 562570 | 1089482 | 100.000 |

# HRMC (2R,3R,4S,5R)-2-(6-Aminopurin-9-yl)-5-[2-(1,3-benzothiazol-2-yl) ethyl]tetrahydrofuran-3,4-diol (25)

Compound Table

| Label                         | Tgt Score | Mass Error (ppm) | Tgt Formula     | Obs. RT | Ref. Mass | Obs. Mass |
|-------------------------------|-----------|------------------|-----------------|---------|-----------|-----------|
| Cpd 1: C18 H18 N6 O3 S; 1.666 | 99.11     | 3.22             | C18 H18 N6 O3 S | 1.666   | 398.1161  | 398.1174  |

| Obs. m/z | Obs. RT | Obs. Mass | Tgt Formula     | Tgt Mass | Tgt Mass Error (ppm) | Find Cpds Algorithm |
|----------|---------|-----------|-----------------|----------|----------------------|---------------------|
| 421.1054 | 1.666   | 398.1174  | C18 H18 N6 O3 S | 398.1161 | 3.22                 | Find by Formula     |

Compound Chromatograms

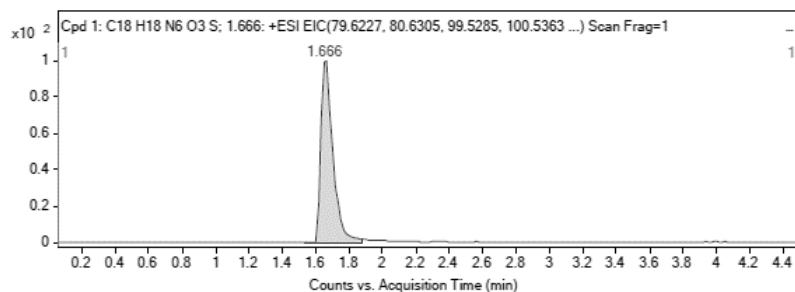

MS Zoomed Spectrum

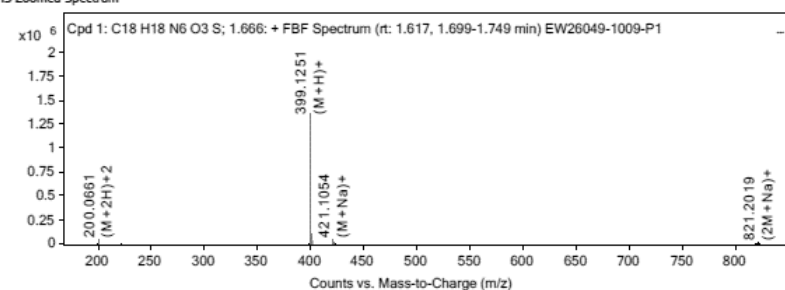

MS Spectrum Peak List

| Obs. m/z | Charge | Abund   | Ion/Isotope |
|----------|--------|---------|-------------|
| 200.0661 | 2      | 38145.5 | (M+2H)+2    |
| 200.5672 | 2      | 8738.28 | (M+2H)+2    |

|          |   |            |          |
|----------|---|------------|----------|
| 201.0661 | 2 | 3324.03    | (M+2H)+2 |
| 399.1251 | 1 | 1358144.75 | (M+H)+   |
| 400.1260 | 1 | 316680.78  | (M+H)+   |
| 401.1235 | 1 | 98099.39   | (M+H)+   |
| 421.1054 | 1 | 43094.38   | (M+Na)+  |
| 422.1070 | 1 | 9586.86    | (M+Na)+  |
| 819.2206 | 1 | 5366.74    | (2M+Na)+ |
| 821.2019 | 1 | 6874.68    | (2M+Na)+ |

MS Zoomed Spectrum

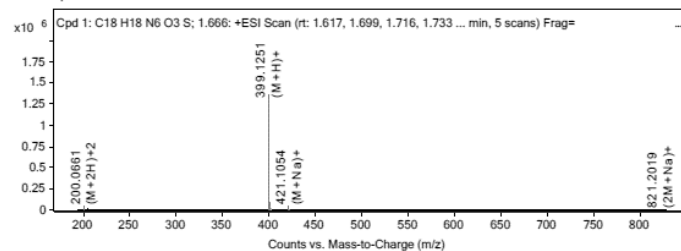

MS Spectrum Peak List

| Obs. m/z | Charge | Abund      | Ion/Isotope | Tgt Mass Error (ppm) |
|----------|--------|------------|-------------|----------------------|
| 200.0661 | 2      | 38145.5    | (M+2H)+2    | -3.6                 |
| 200.5672 | 2      | 8738.28    | (M+2H)+2    | -2.95                |
| 201.0661 | 2      | 3324.03    | (M+2H)+2    | -5.06                |
| 399.1251 | 1      | 1358144.75 | (M+H)+      | -4.29                |
| 400.1260 | 1      | 316680.78  | (M+H)+      | -1.97                |
| 401.1235 | 1      | 98099.39   | (M+H)+      | -1.39                |
| 421.1054 | 1      | 43094.38   | (M+Na)+     | -6.12                |
| 422.1070 | 1      | 9586.86    | (M+Na)+     | 0.96                 |
| 819.2206 | 1      | 5366.74    | (2M+Na)+    | 1.06                 |
| 821.2019 | 1      | 6874.68    | (2M+Na)+    | 29                   |

--- End Of Report ---

**<sup>1</sup>H NMR (1*R*,4*S*,5*R*,6*S*)-5,6-Dihydroxy-2-azabicyclo[2.2.1]heptan-3-one (52)**

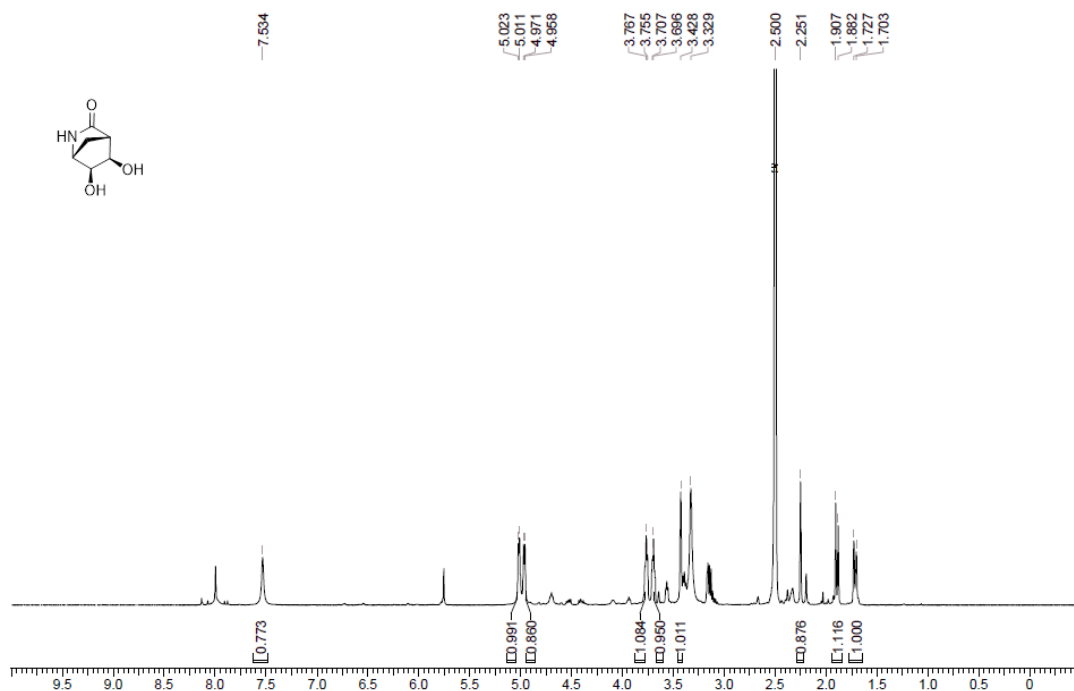

**LCMS (1*R*,4*S*,5*R*,6*S*)-5,6-Dihydroxy-2-azabicyclo[2.2.1]heptan-3-one (52)**

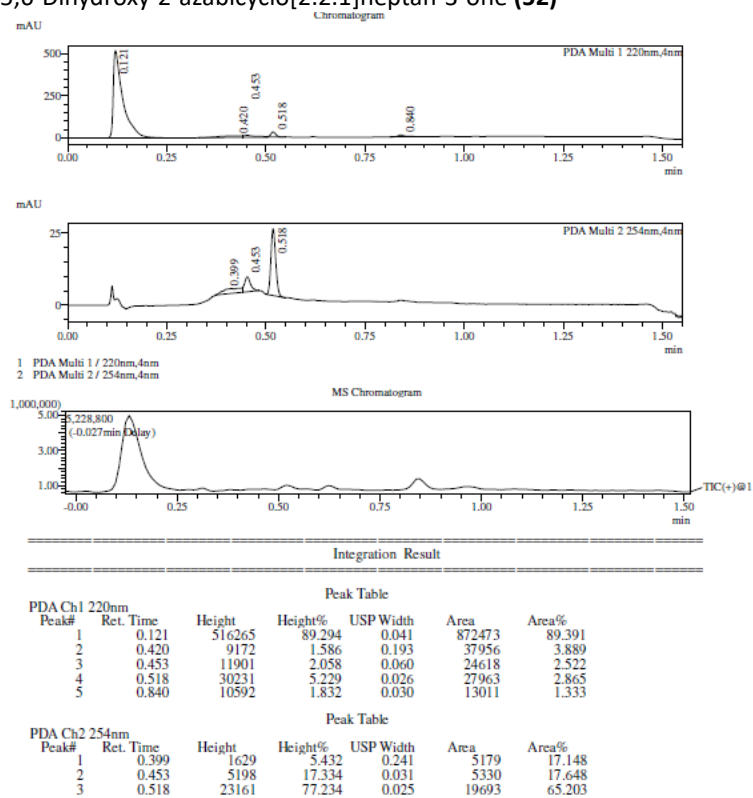

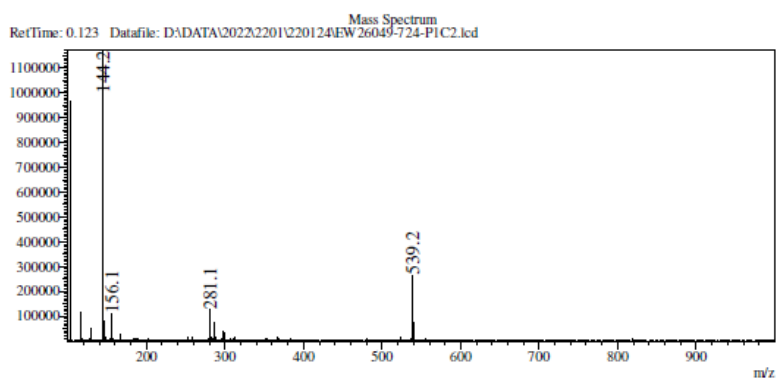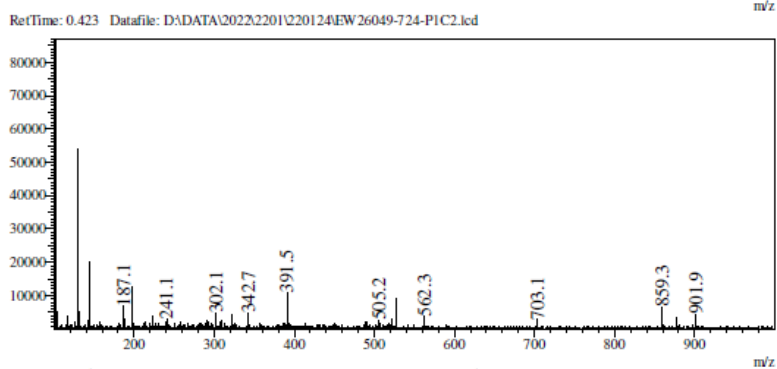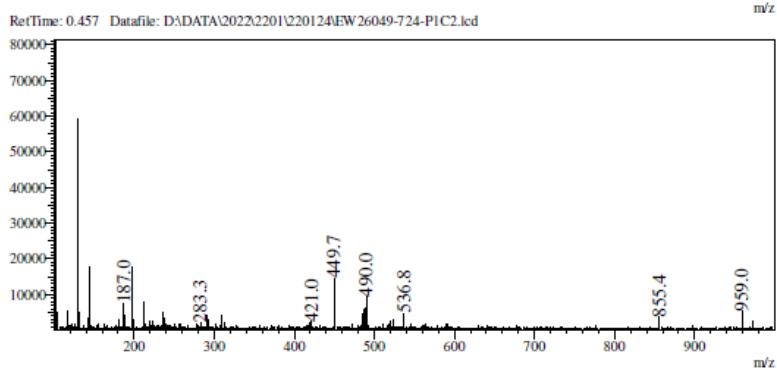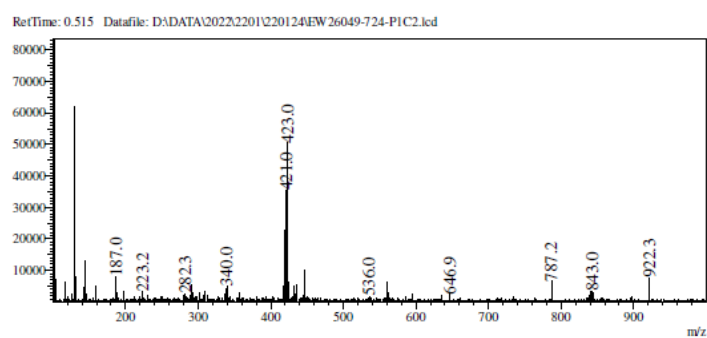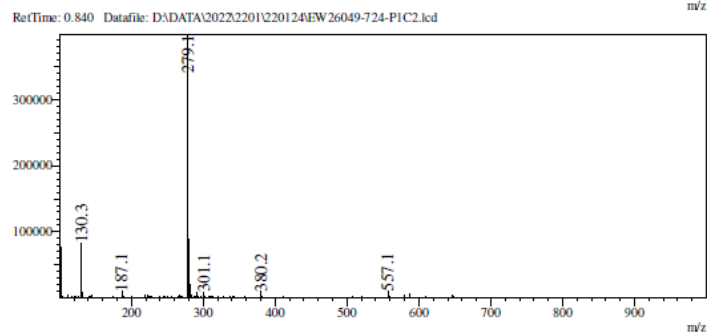

**<sup>1</sup>H NMR (1*R*,4*S*,5*R*,6*S*)-5,6-Bis[[tert-butyl(diphenyl)silyl]oxy]-2-azabicyclo [2.2.1]heptan-3-one (53)**

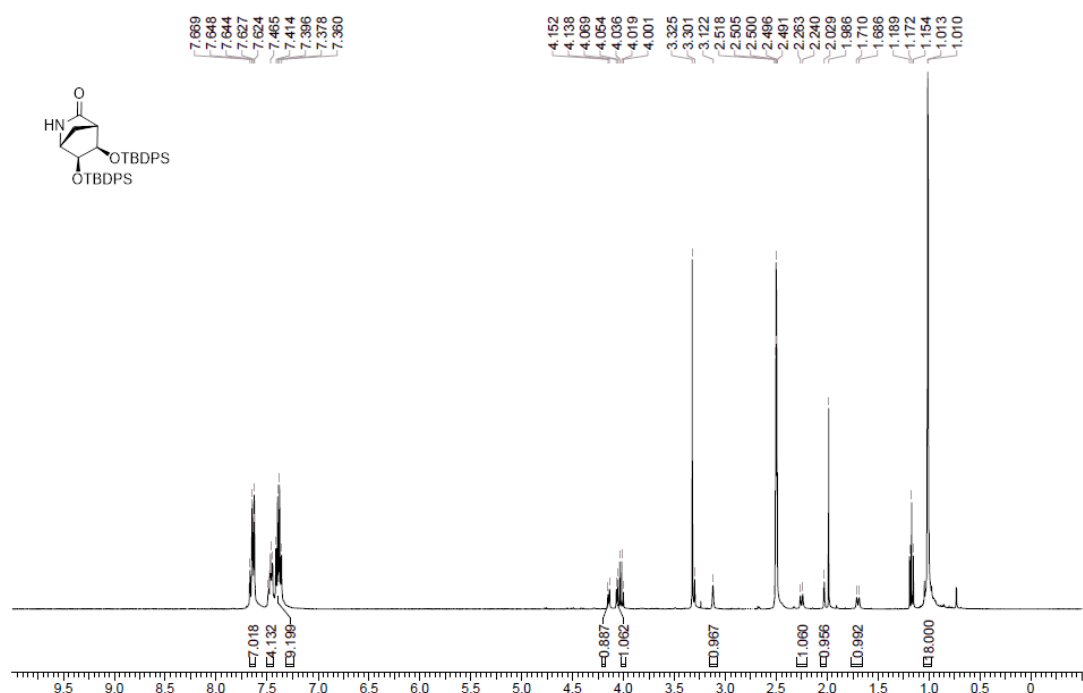

**LCMS (1*R*,4*S*,5*R*,6*S*)-5,6-Bis[[tert-butyl(diphenyl)silyl]oxy]-2-azabicyclo [2.2.1]heptan-3-one (53)**

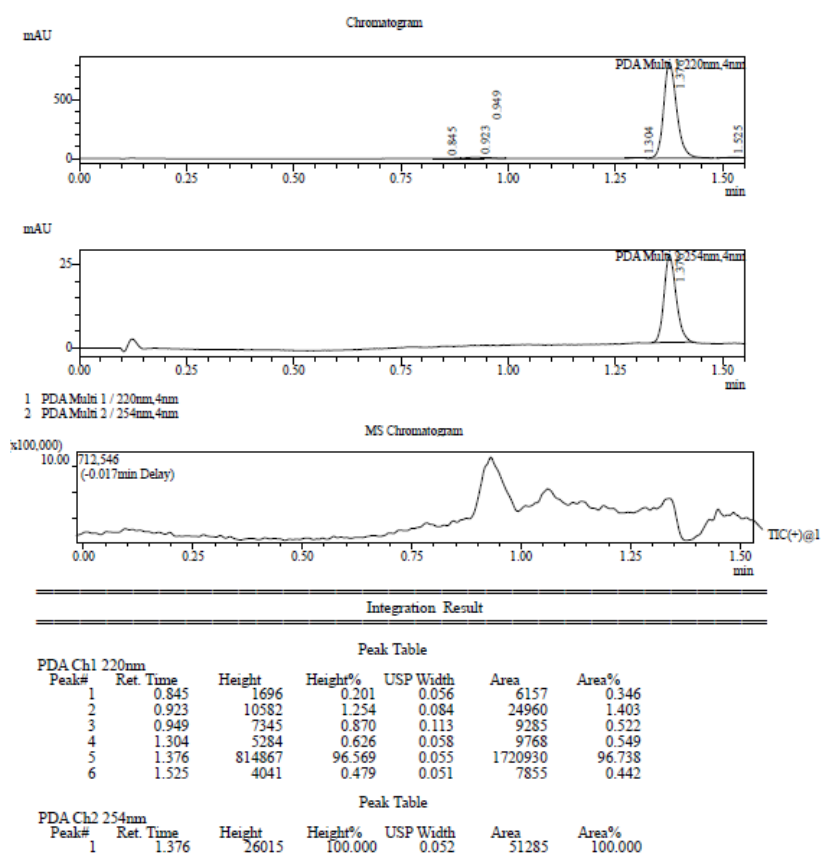

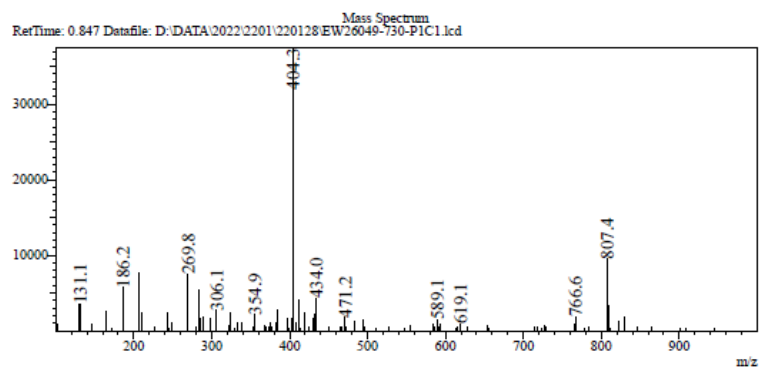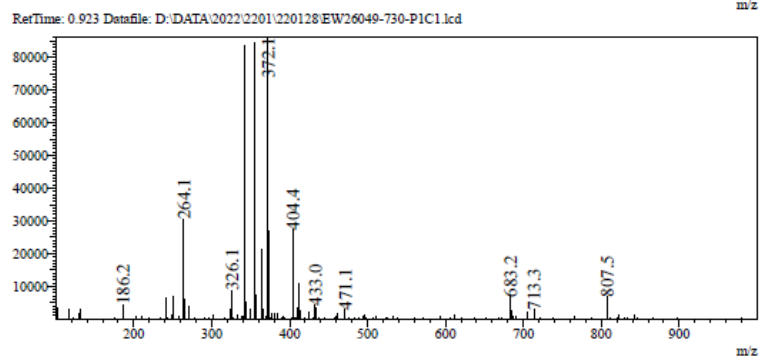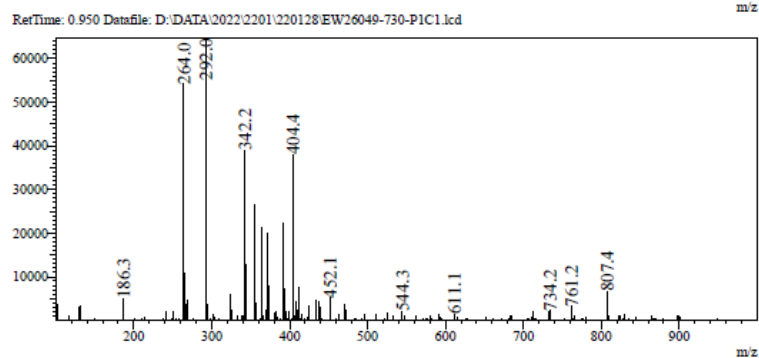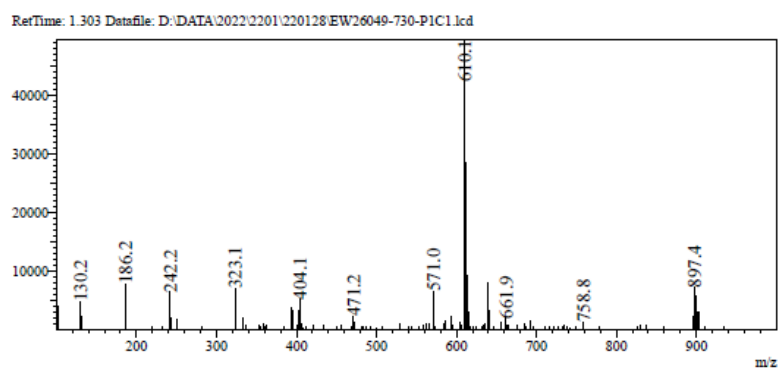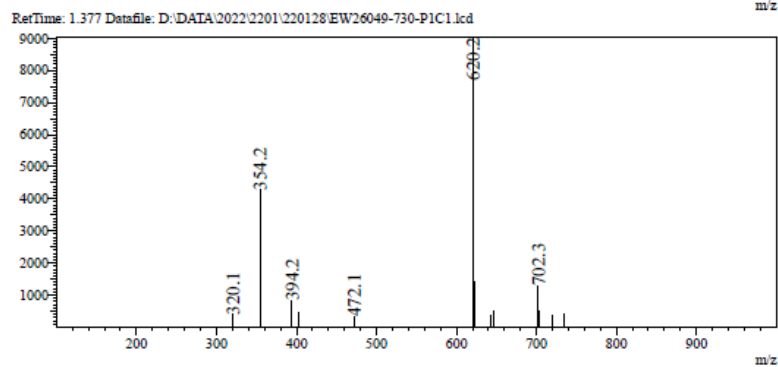

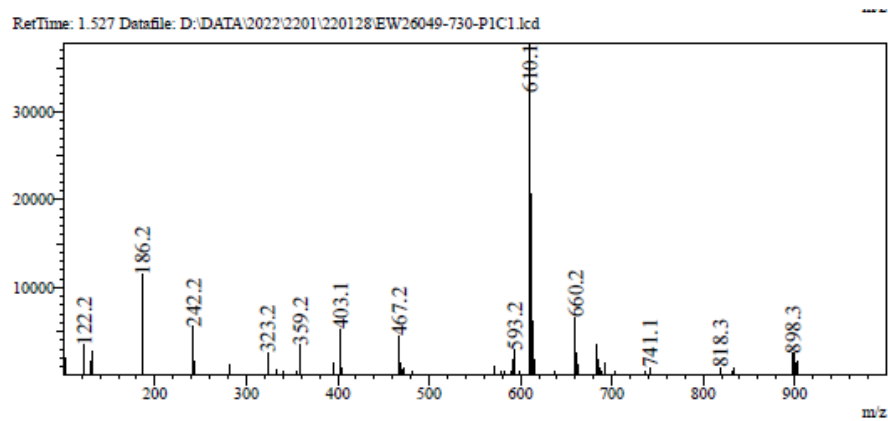

<sup>1</sup>H NMR Benzyl (1*R*,4*S*,5*R*,6*S*)-5,6-bis[[*tert*-butyl(diphenyl)silyl]oxy]-3-oxo-2-azabicyclo[2.2.1] heptane-2-carboxylate (**54**)

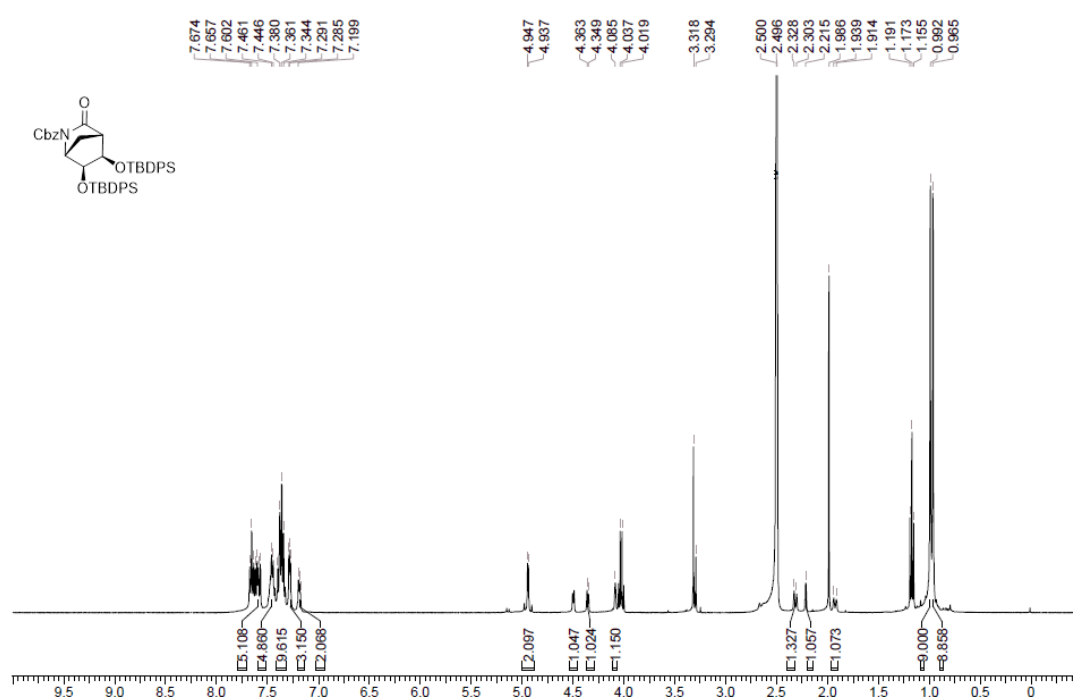



**LCMS**    Benzyl    (1*R*,4*S*,5*R*,6*S*)-5,6-bis[[*tert*-butyl(diphenyl)silyl]oxy]-3-oxo-2-azabicyclo[2.2.1]    heptane-2-  
 carboxylate (**54**)

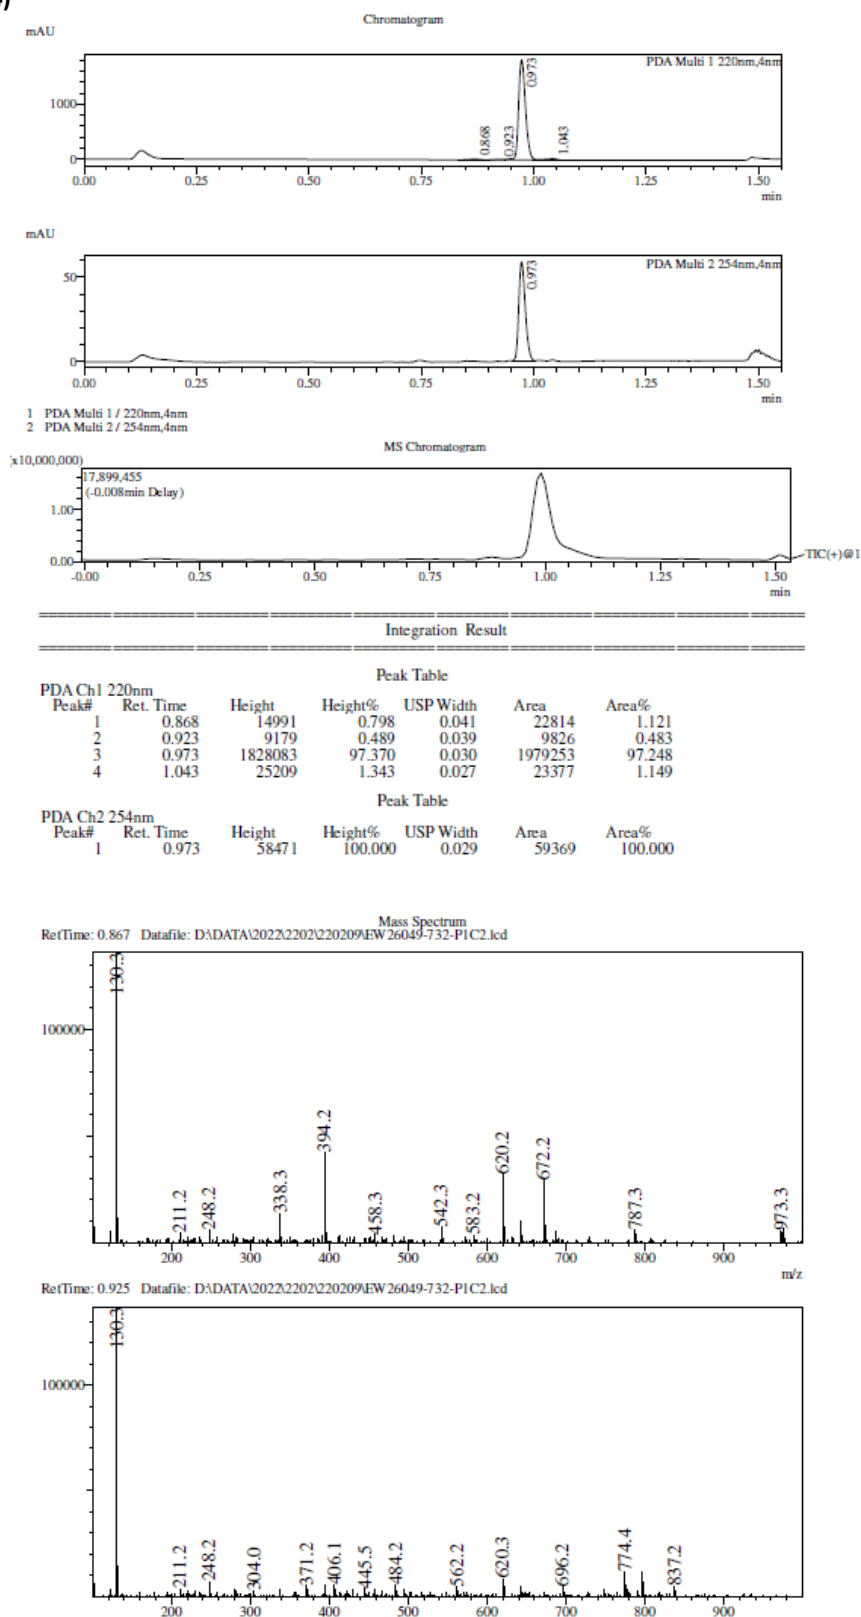

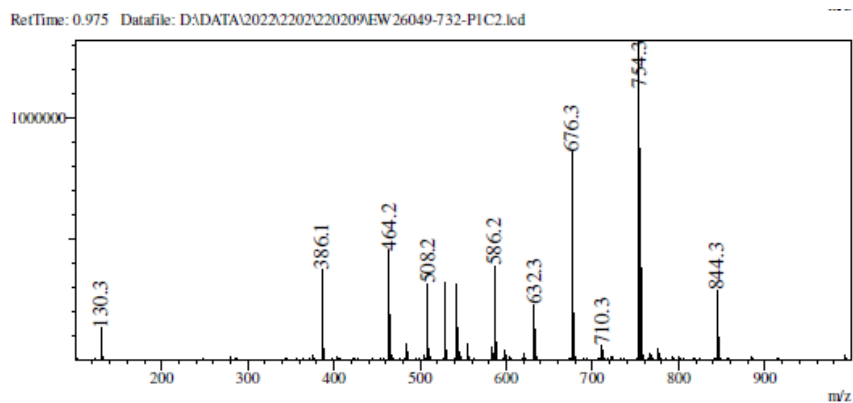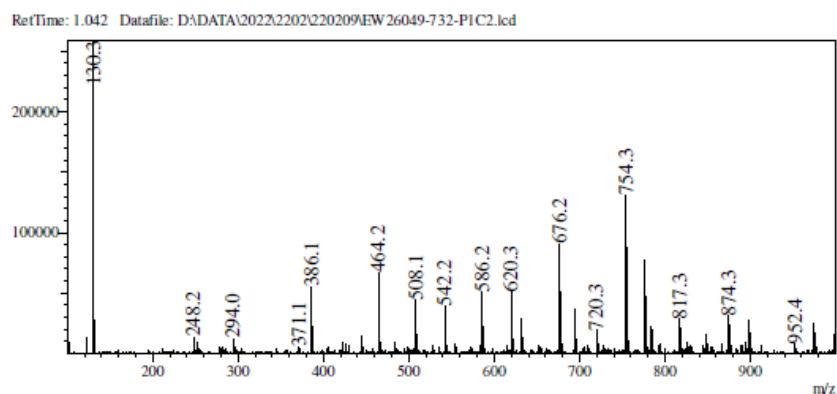

$^1\text{H}$  NMR Benzyl *N*-[(1*R*,2*S*,3*R*,4*R*)-2,3-bis[[*tert*-butyl(diphenyl)silyl]oxy]-4 (hydroxymethyl) cyclopentyl]carbamate (55)

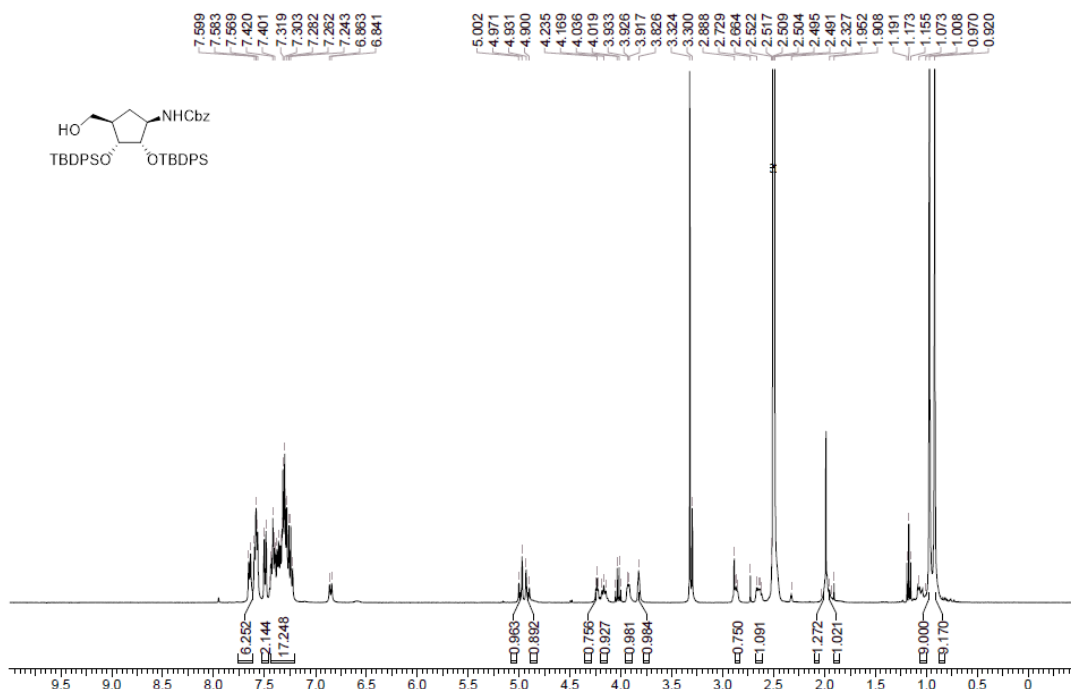

**LCMS** Benzyl *N*-[(1*R*,2*S*,3*R*,4*R*)-2,3-bis[[*tert*-butyl(diphenyl)silyl]oxy]-4 (hydroxymethyl) cyclopentyl]carbamate (55)

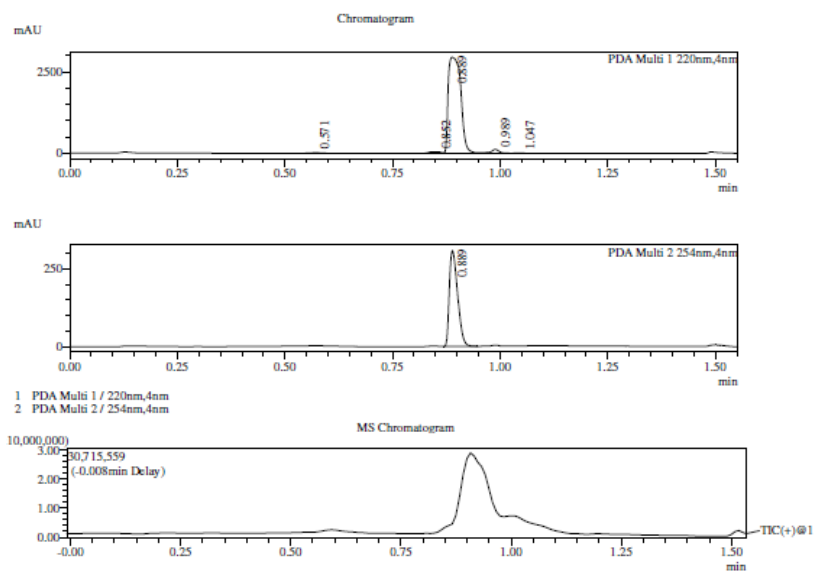

Integration Result

| Peak Table |           |         |         |           |         |        |
|------------|-----------|---------|---------|-----------|---------|--------|
| Peak#      | Ret. Time | Height  | Height% | USP Width | Area    | Area%  |
| 1          | 0.571     | 18871   | 0.596   | 0.046     | 35343   | 0.557  |
| 2          | 0.852     | 50866   | 1.608   | 0.051     | 98446   | 1.550  |
| 3          | 0.889     | 2955632 | 93.424  | 0.047     | 6004051 | 94.549 |
| 4          | 0.989     | 124214  | 3.926   | 0.034     | 188584  | 2.970  |
| 5          | 1.047     | 14108   | 0.446   | 0.052     | 23776   | 0.374  |

  

| Peak Table |           |        |         |           |        |         |
|------------|-----------|--------|---------|-----------|--------|---------|
| Peak#      | Ret. Time | Height | Height% | USP Width | Area   | Area%   |
| 1          | 0.889     | 308139 | 100.000 | 0.037     | 414289 | 100.000 |

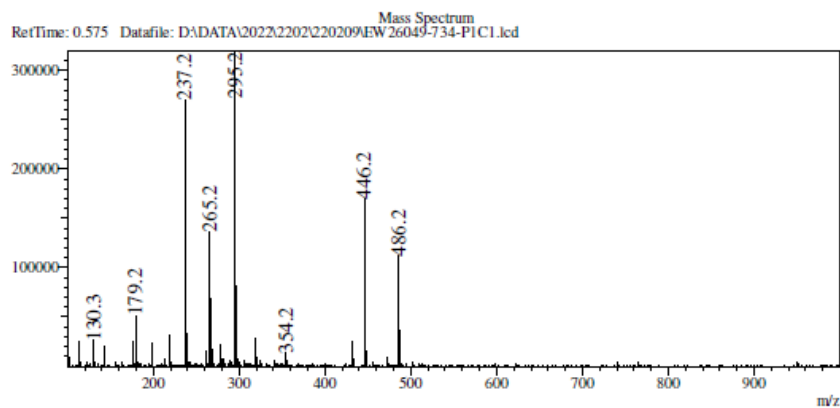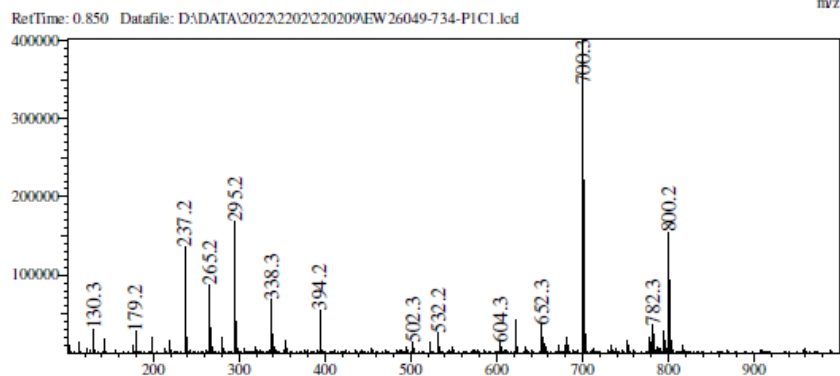

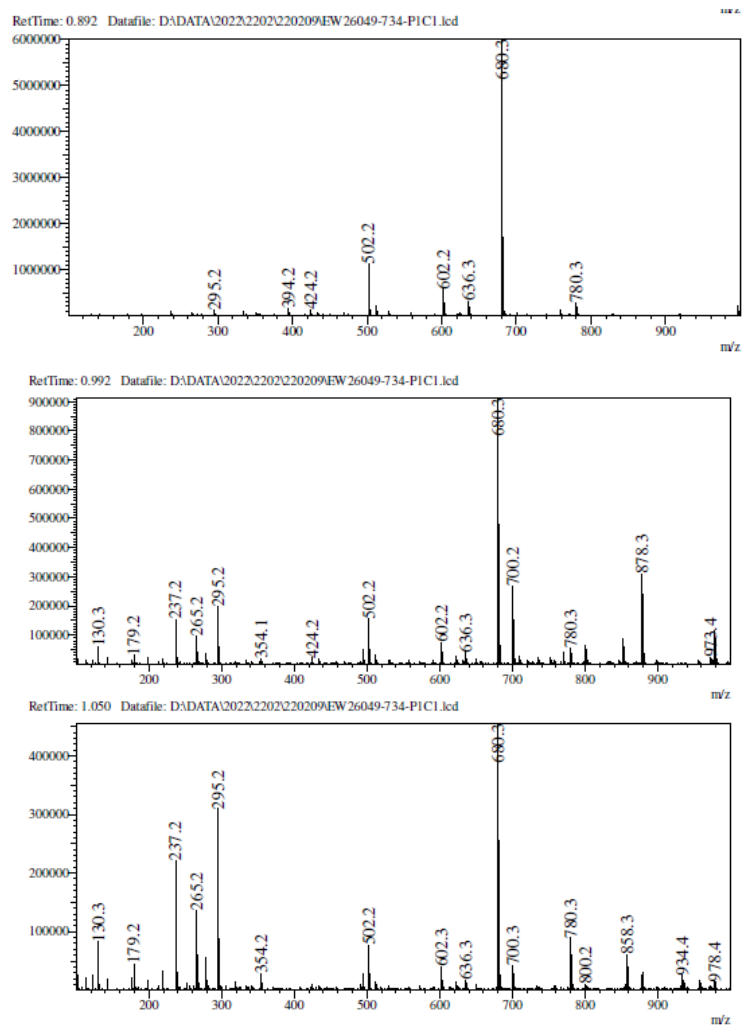

$^1\text{H}$  NMR [(1*R*,2*R*,3*S*,4*R*)-4-Amino-2,3-bis[[*tert*-butyl(diphenyl)silyl]oxy] cyclopentyl]methanol (**56**)

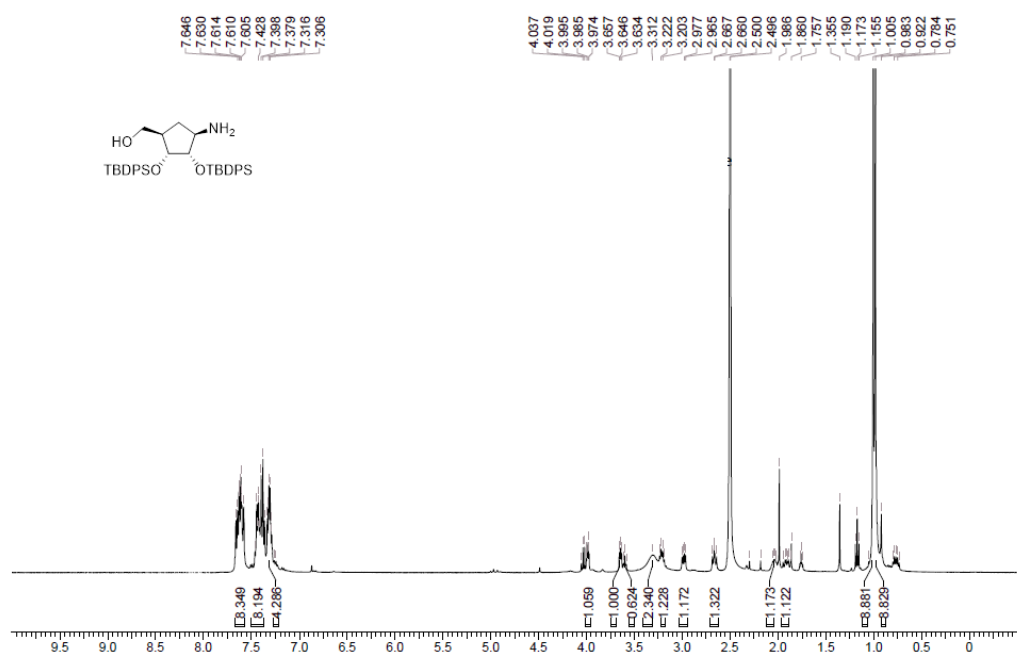

# LCMS [(1*R*,2*R*,3*S*,4*R*)-4-Amino-2,3-bis[[*tert*-butyl(diphenyl)silyl]oxy] cyclopentyl]methanol (**56**)

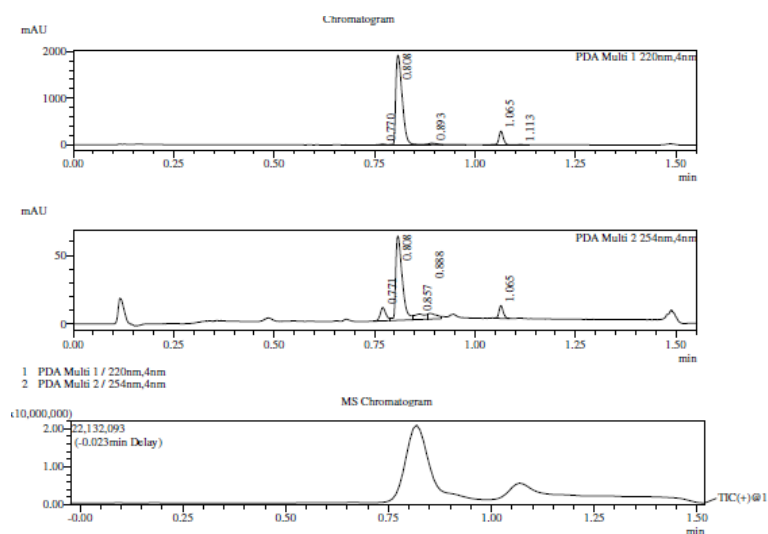

## Integration Result

| Peak Table |           |         |         |           |         |        |
|------------|-----------|---------|---------|-----------|---------|--------|
| Peak#      | Ret. Time | Height  | Height% | USP Width | Area    | Area%  |
| 1          | 0.770     | 19528   | 0.859   | 0.030     | 20112   | 0.815  |
| 2          | 0.808     | 1921466 | 84.510  | 0.030     | 2165763 | 87.722 |
| 3          | 0.893     | 30257   | 1.331   | 0.035     | 38798   | 1.571  |
| 4          | 1.065     | 293255  | 12.898  | 0.022     | 233744  | 9.468  |
| 5          | 1.113     | 9141    | 0.402   | 0.030     | 10484   | 0.425  |

  

| Peak Table |           |        |         |           |       |        |
|------------|-----------|--------|---------|-----------|-------|--------|
| Peak#      | Ret. Time | Height | Height% | USP Width | Area  | Area%  |
| 1          | 0.771     | 9727   | 11.014  | 0.028     | 9671  | 9.771  |
| 2          | 0.808     | 61503  | 69.644  | 0.030     | 68799 | 69.509 |
| 3          | 0.857     | 3740   | 4.235   | 0.103     | 7591  | 7.670  |
| 4          | 0.888     | 4137   | 4.685   | 0.067     | 6218  | 6.282  |
| 5          | 1.065     | 9204   | 10.422  | 0.022     | 6699  | 6.768  |

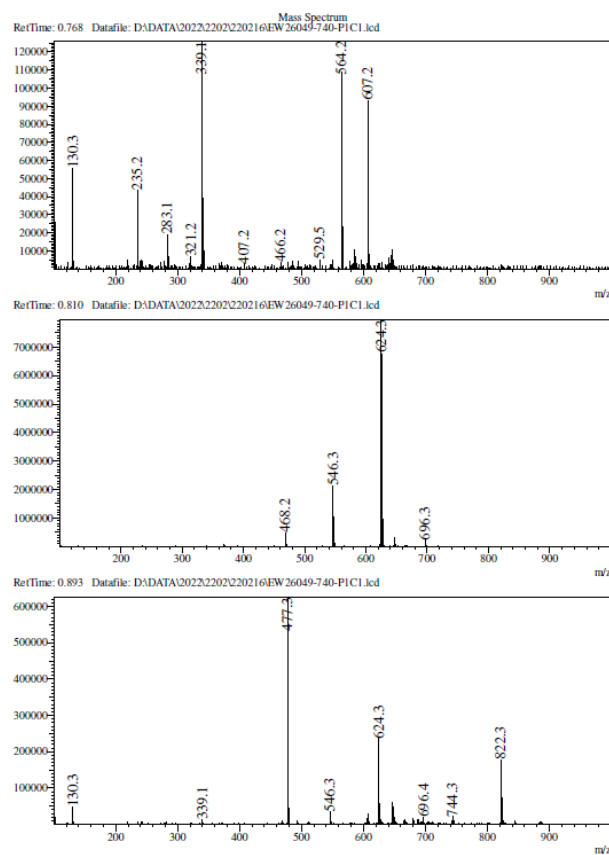

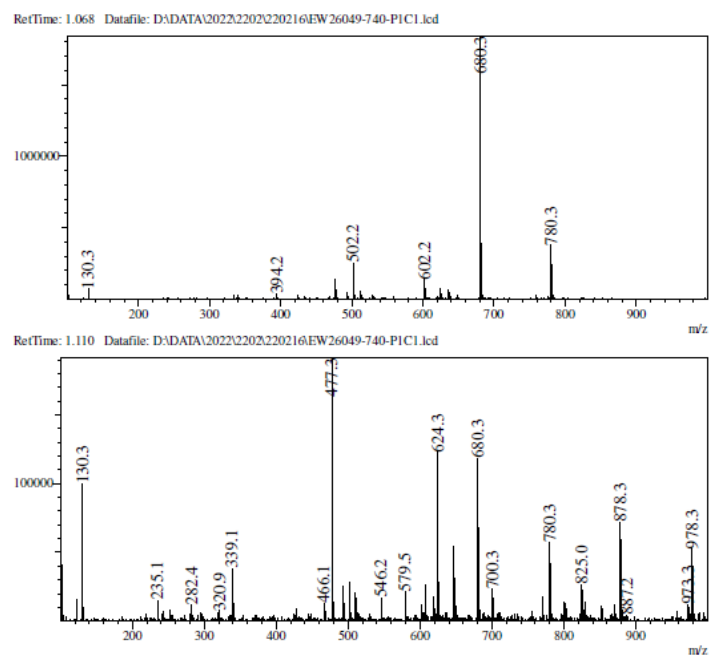

**<sup>1</sup>H NMR *N*-(4,6-dichloropyrimidin-5-yl)formamide (57a)**

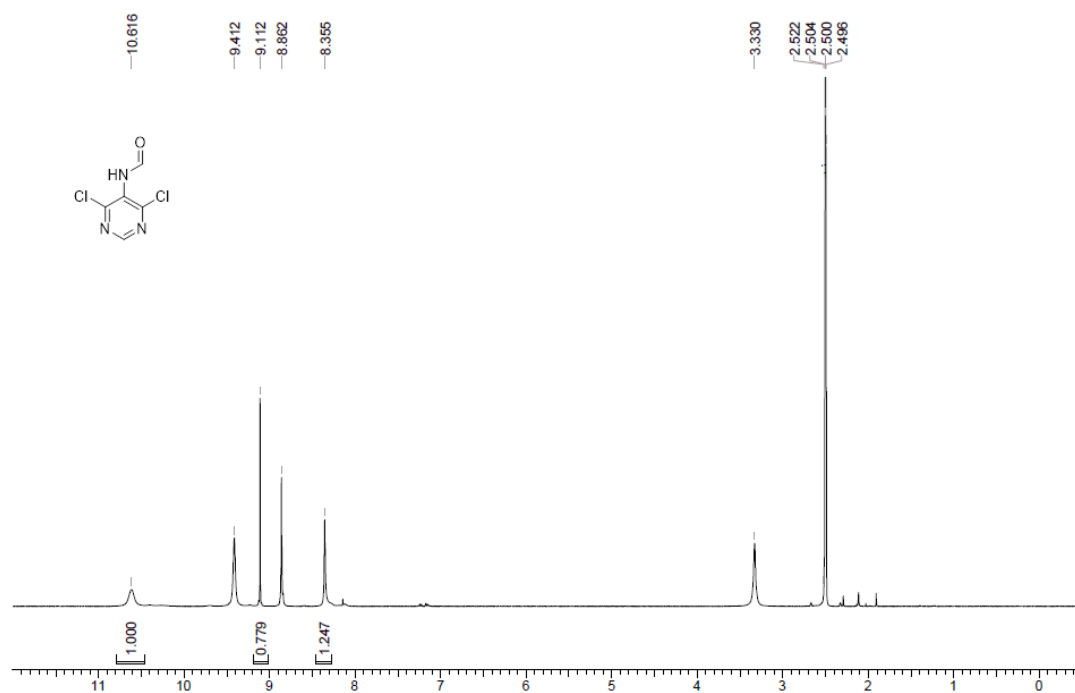

**<sup>1</sup>H NMR [(1*R*,2*R*,3*S*,4*R*)-2,3-Bis[[tert-butyl(diphenyl)silyl]oxy]-4-(6-chloropurin-9-yl)cyclopentyl] methanol (58a)**

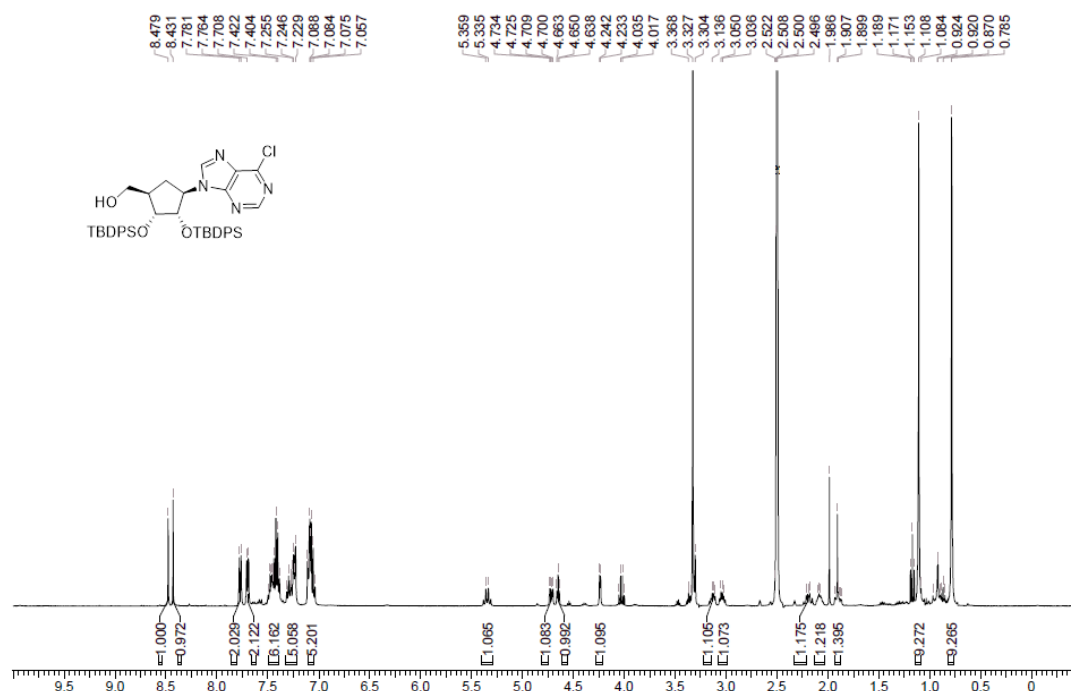

**LCMS [(1*R*,2*R*,3*S*,4*R*)-2,3-Bis[[tert-butyl(diphenyl)silyl]oxy]-4-(6-chloropurin-9-yl)cyclopentyl] methanol (58a)**

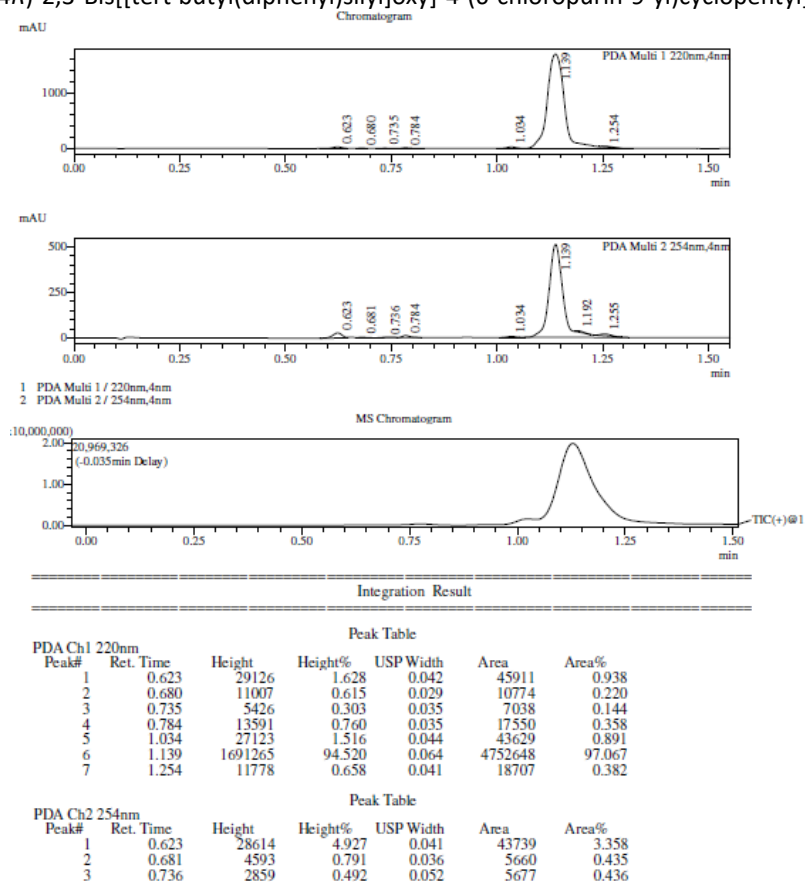

Mass Spectrum  
 RetTime: 0.622 Datafile: D:\DATA\2022\2202\220218\FW26049-749-P1C1.lcd

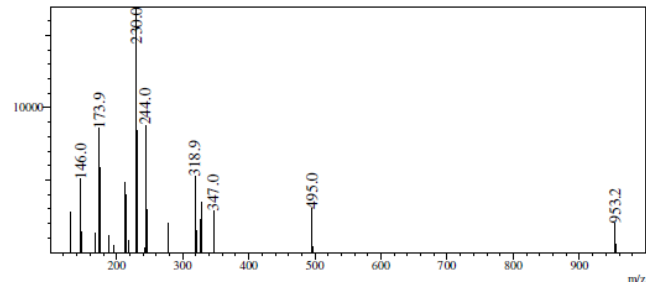

RetTime: 0.678 Datafile: D:\DATA\2022\2202\220218\FW26049-749-P1C1.lcd

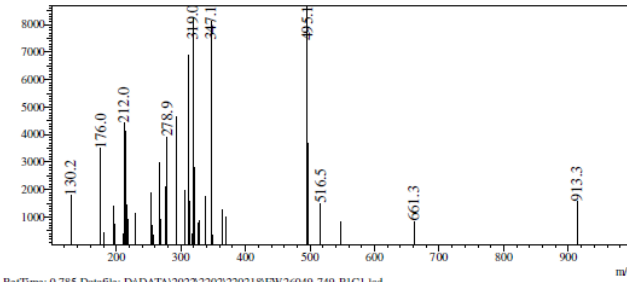

RetTime: 0.785 Datafile: D:\DATA\2022\2202\220218\FW26049-749-P1C1.lcd

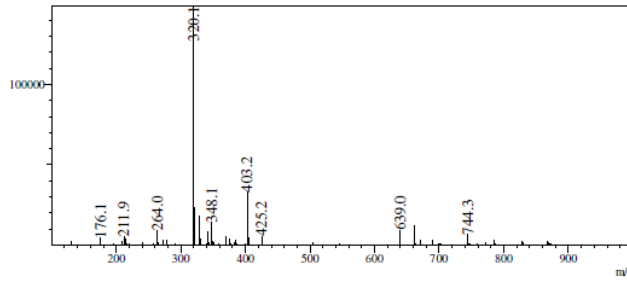

RetTime: 1.035 Datafile: D:\DATA\2022\2202\220218\FW26049-749-P1C1.lcd

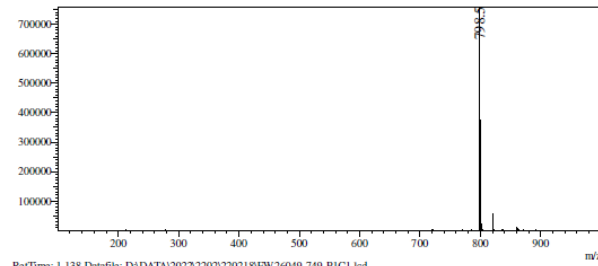

RetTime: 1.138 Datafile: D:\DATA\2022\2202\220218\FW26049-749-P1C1.lcd

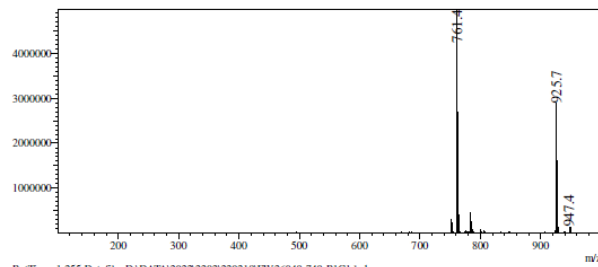

RetTime: 1.255 Datafile: D:\DATA\2022\2202\220218\FW26049-749-P1C1.lcd

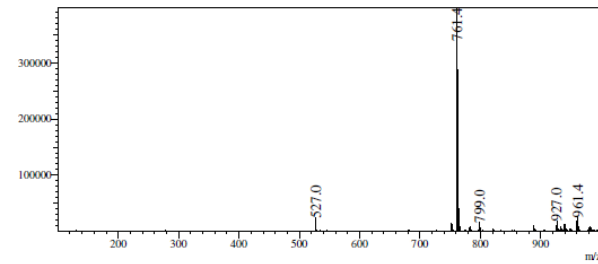



**<sup>1</sup>H NMR** [(1*R*,2*R*,3*S*,4*R*)-2,3-Bis[[tert-butyl(diphenyl)silyl]oxy]-4-(4-chloropyrrolo[2,3-*d*]pyrimidin-7-yl)cyclopentyl]methanol (**58b**)

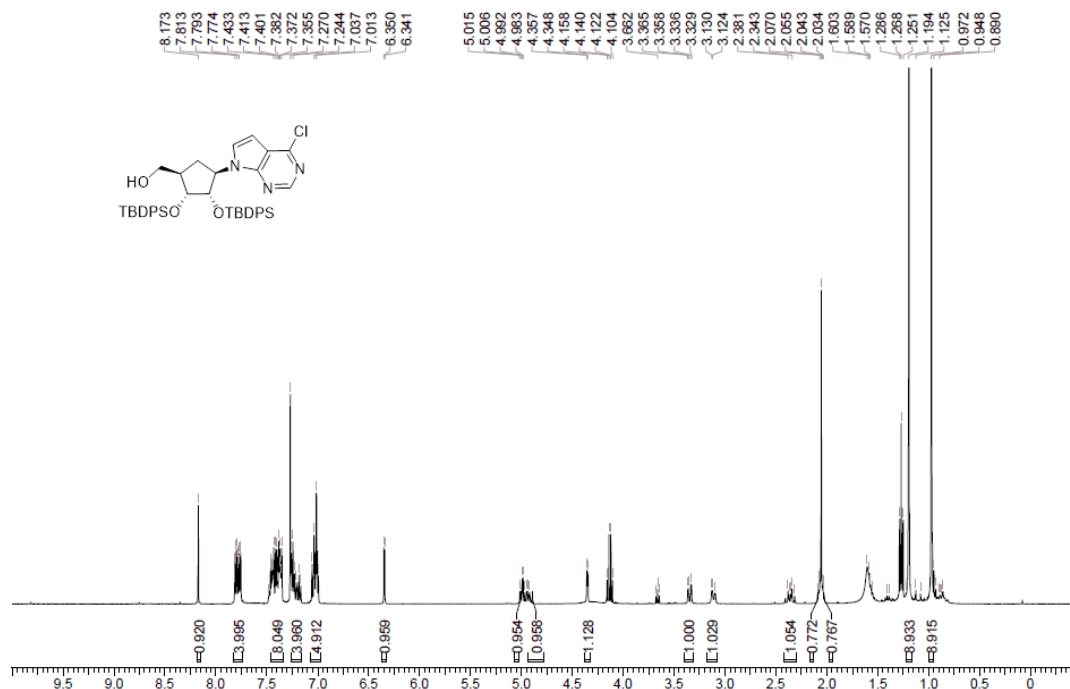

**LCMS** [(1*R*,2*R*,3*S*,4*R*)-2,3-Bis[[tert-butyl(diphenyl)silyl]oxy]-4-(4-chloropyrrolo[2,3-*d*]pyrimidin-7-yl)cyclopentyl]methanol (**58b**)

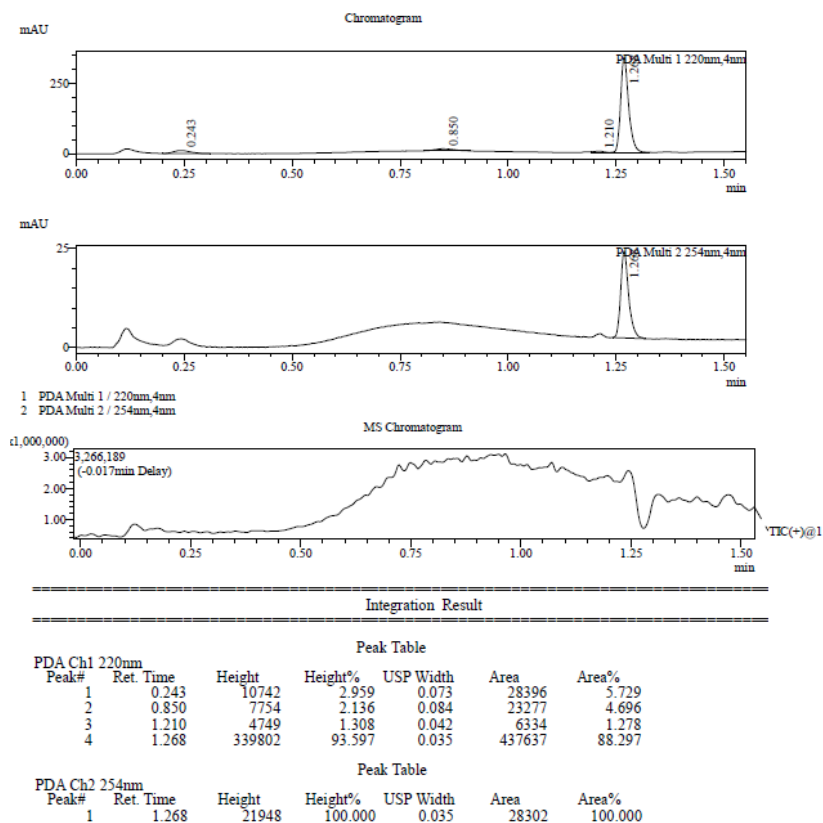

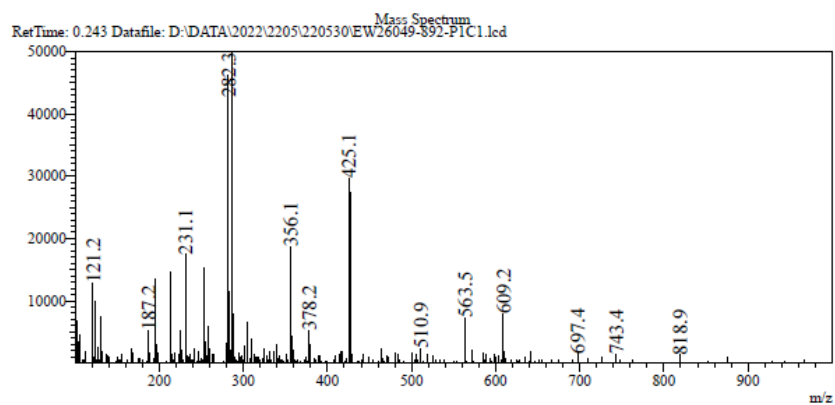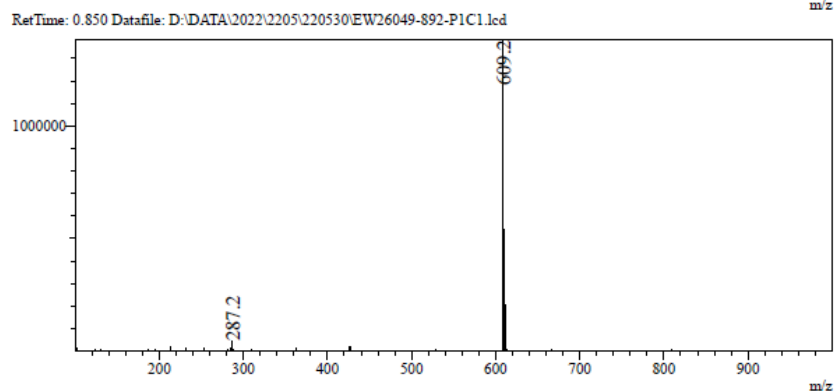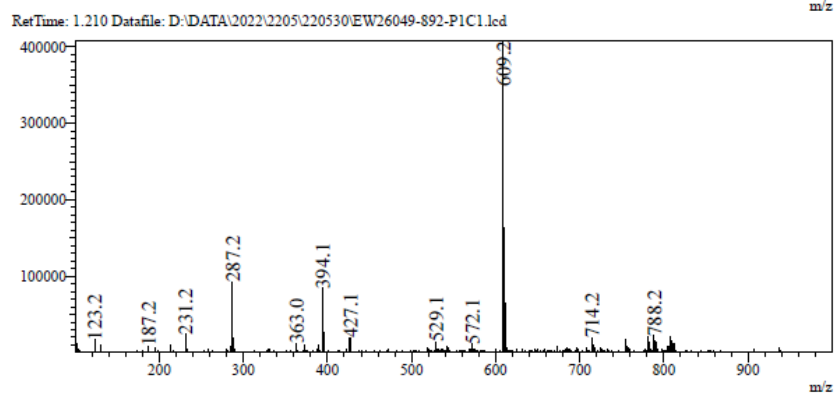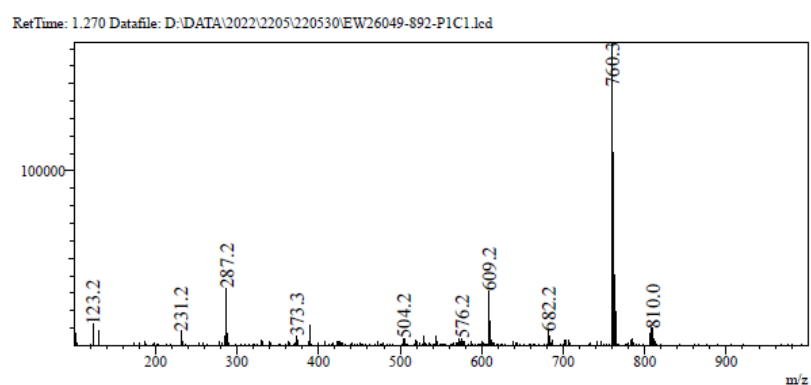

**<sup>1</sup>H NMR [(1*R*,2*R*,3*S*,4*R*)-4-(6-Aminopurin-9-yl)-2,3-bis[[tert-butyl(diphenyl) silyl]oxy]cyclopentyl] methanol (59a)**

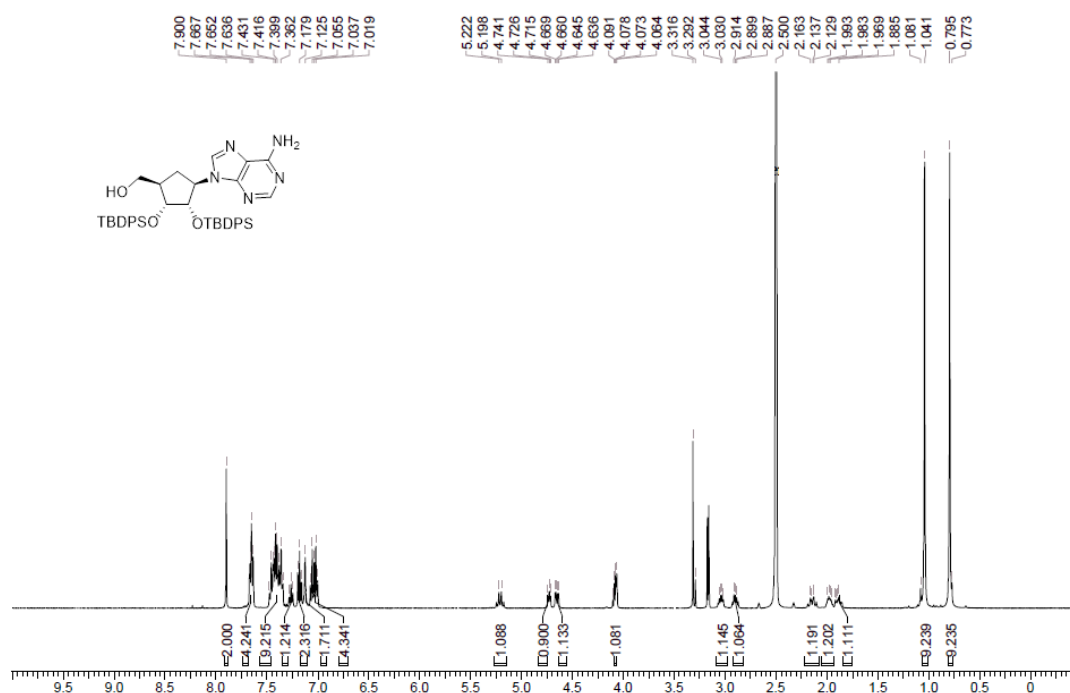

**LCMS [(1*R*,2*R*,3*S*,4*R*)-4-(6-Aminopurin-9-yl)-2,3-bis[[tert-butyl(diphenyl) silyl]oxy]cyclopentyl] methanol (59a)**

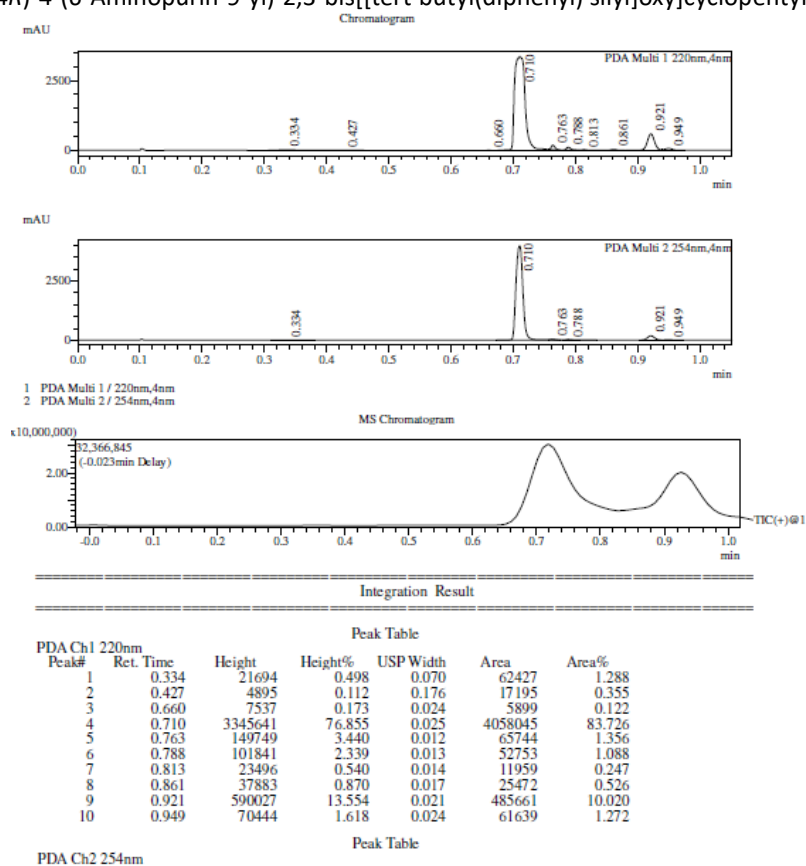

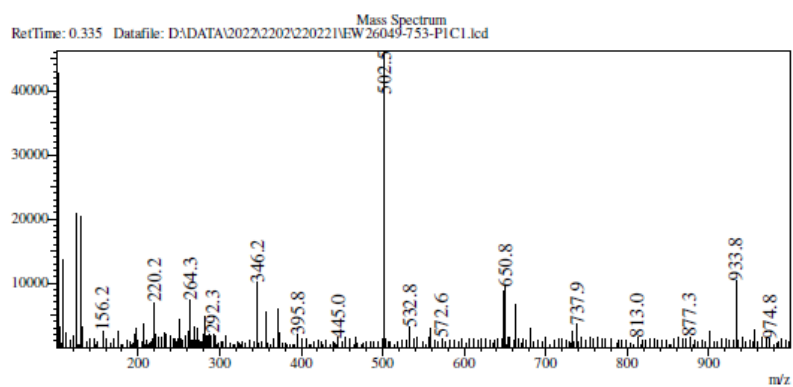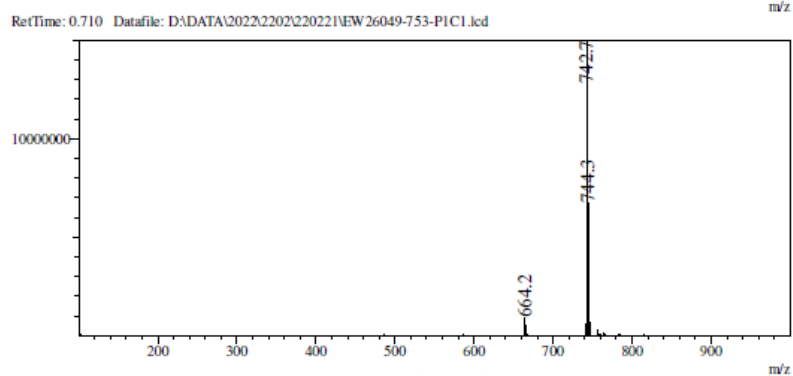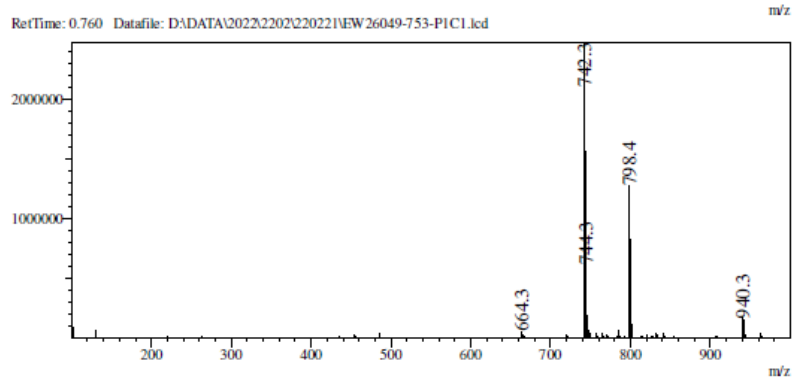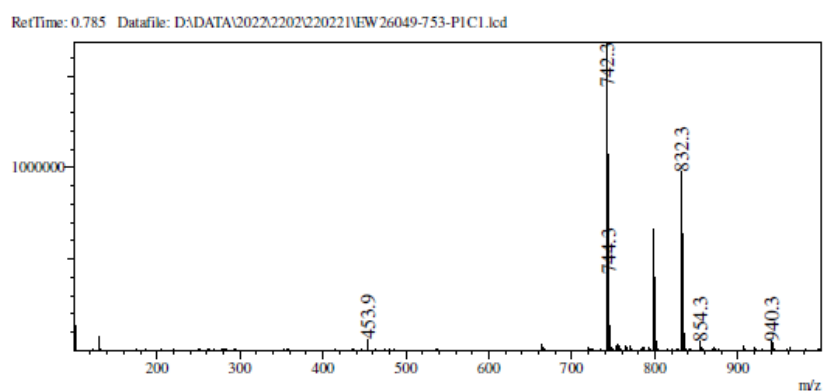

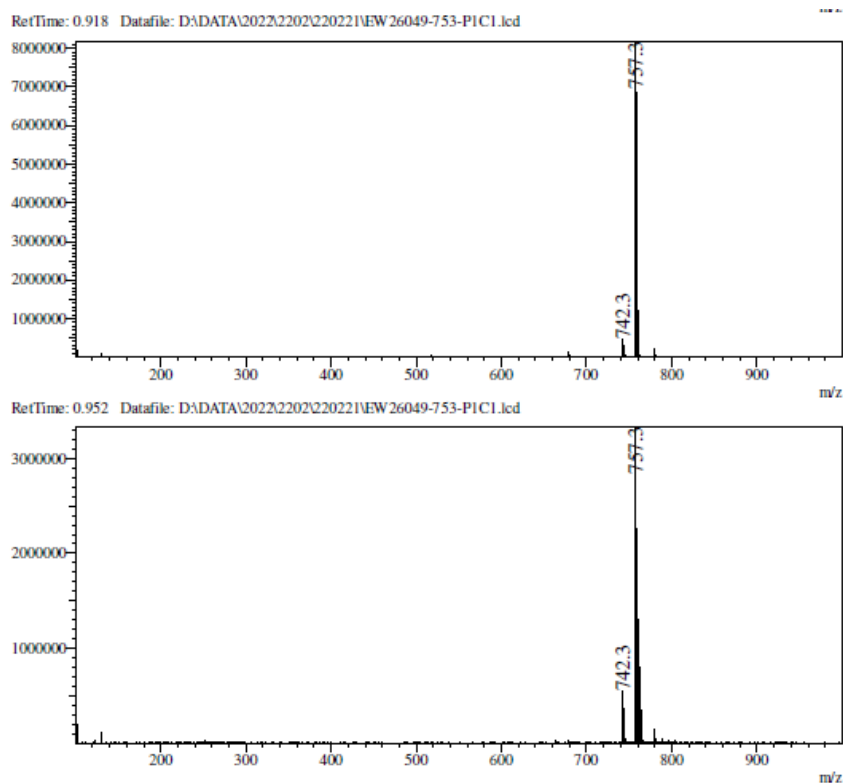

$^1\text{H}$  NMR CC(C)(C)[Si](c1ccc(cc1)C(F)(F)F)(c2ccc(cc2)C(F)(F)F)C3CC[C@H](C3C4C[C@@H](CO)N5C=NC6=C(N)N=CN=C54)O [(1*R*,2*R*,3*S*,4*R*)-4-(4-Aminopyrrolo[2,3-*d*]pyrimidin-7-yl)-2,3-bis [[tert-butyl(diphenyl)silyl]oxy]cyclopentyl]methanol (**59b**)

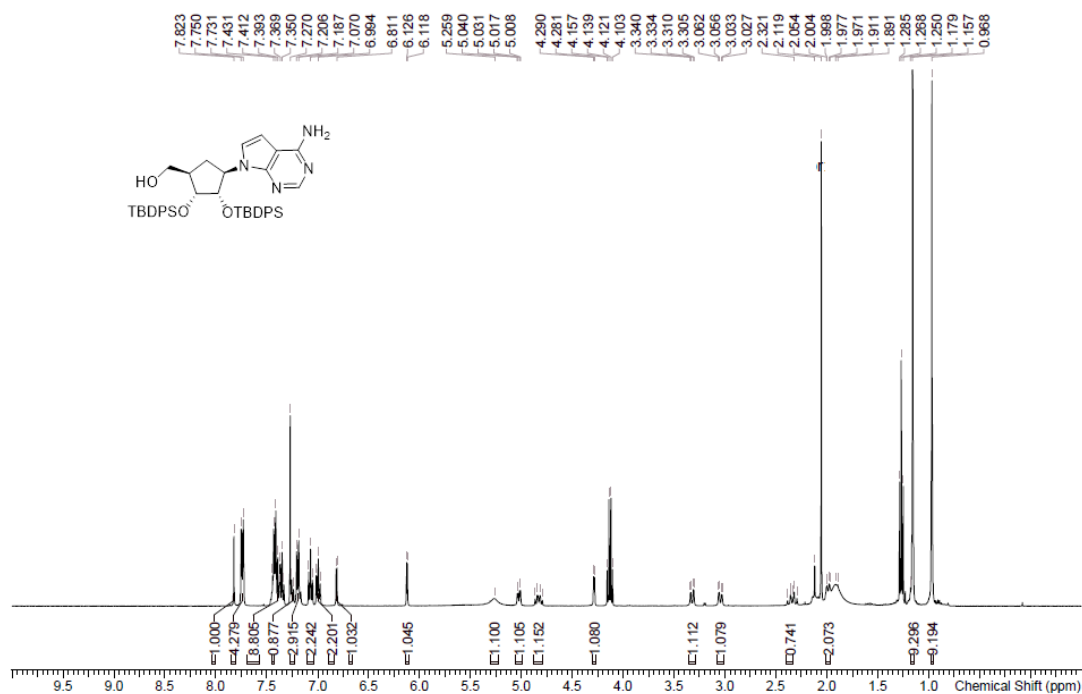

LCMS [(1*R*,2*R*,3*S*,4*R*)-4-(4-Aminopyrrolo[2,3-*d*]pyrimidin-7-yl)-2,3-bis[[tert-butyl(diphenyl)silyl]oxy]cyclopentyl]methanol (**59b**)

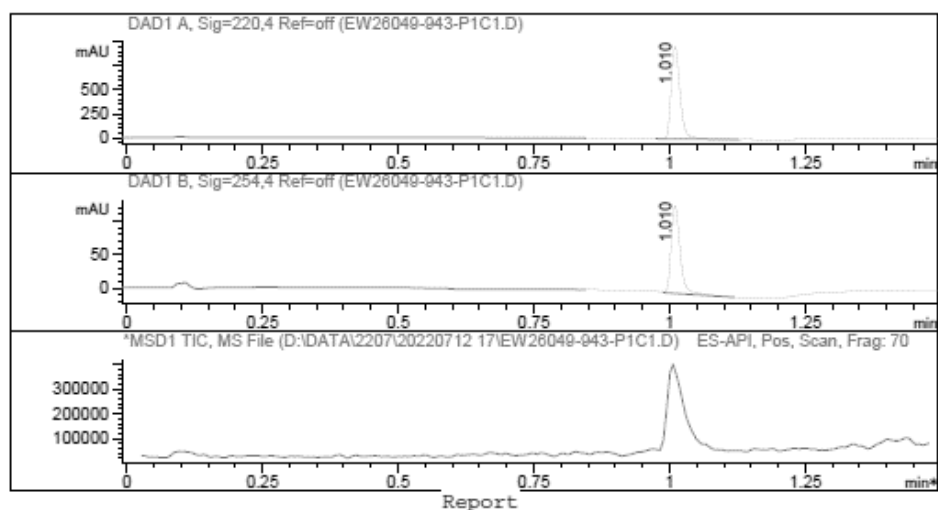

=====

Signal 1 : DAD1 A, Sig=220,4 Ref=off

| # | Meas. | Ret.  | Height  | Width | Area     | Area %  |
|---|-------|-------|---------|-------|----------|---------|
| 1 |       | 1.010 | 964.532 | 0.018 | 1091.277 | 100.000 |

-----

Signal 2 : DAD1 B, Sig=254,4 Ref=off

| # | Meas. | Ret.  | Height  | Width | Area    | Area %  |
|---|-------|-------|---------|-------|---------|---------|
| 1 |       | 1.010 | 130.812 | 0.018 | 151.883 | 100.000 |

-----

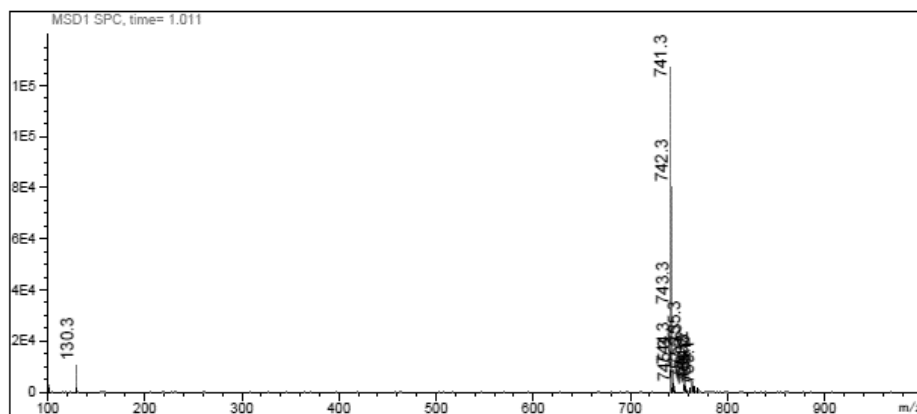

**<sup>1</sup>H NMR** [(1*R*,2*R*,3*S*,4*R*)-4-(6-Aminopurin-9-yl)-2,3-bis[[tert-butyl(diphenyl) silyl]oxy]cyclopentyl] methyl methanesulfonate (**60a**)

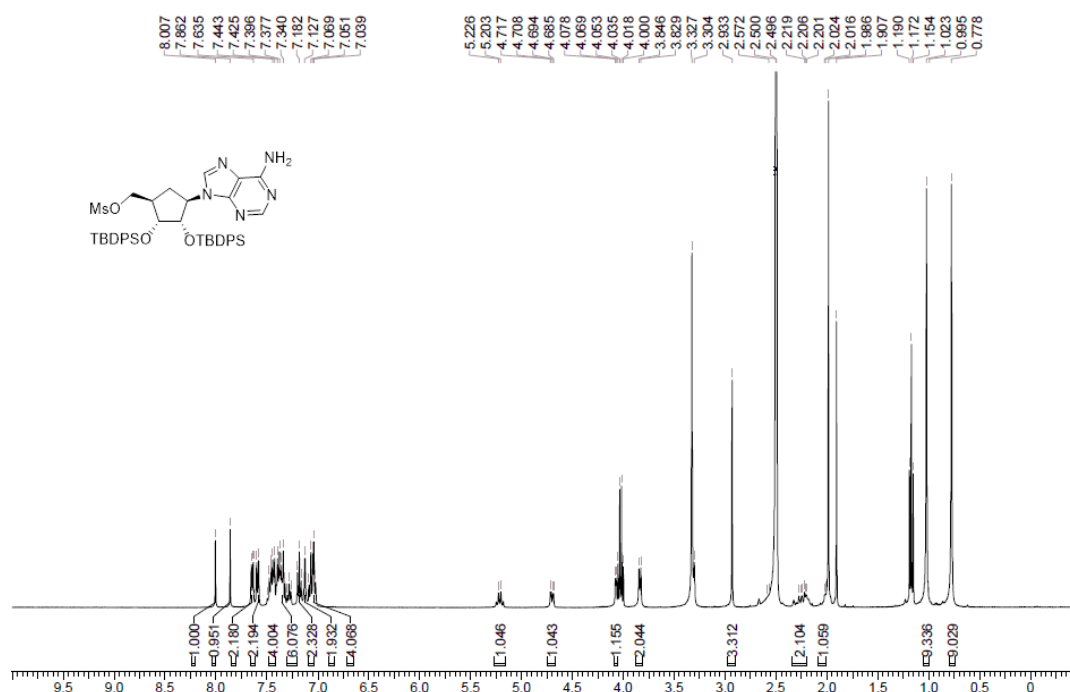

**LCMS** [(1*R*,2*R*,3*S*,4*R*)-4-(6-Aminopurin-9-yl)-2,3-bis[[tert-butyl(diphenyl) silyl]oxy]cyclopentyl] methyl methanesulfonate (**60a**)

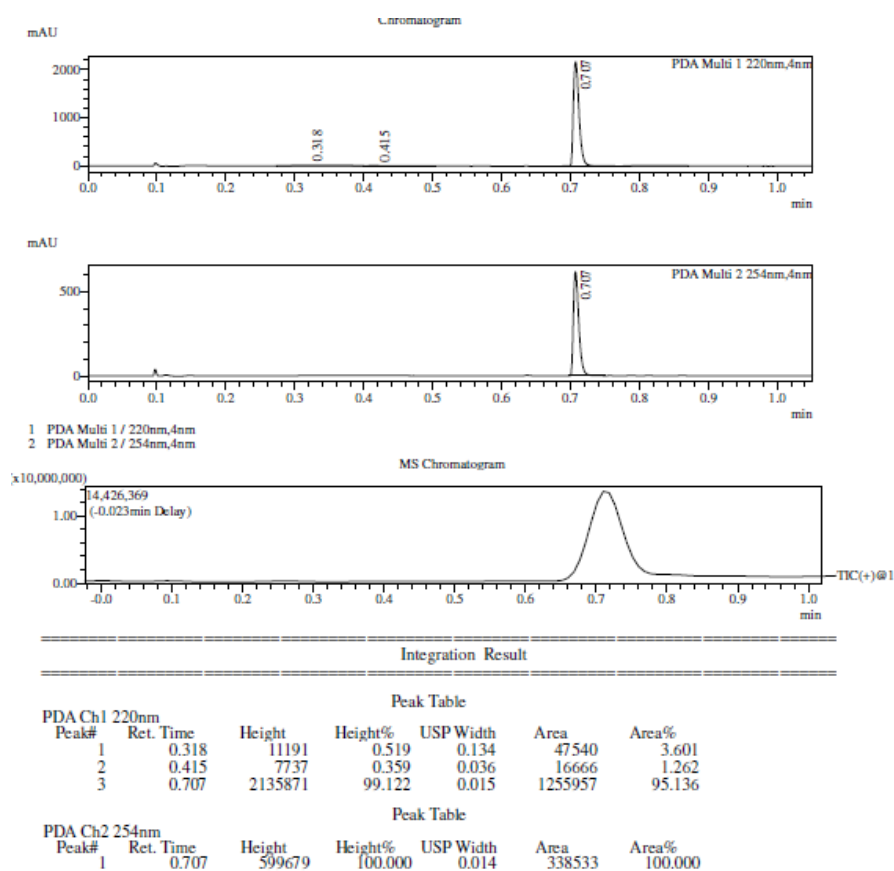

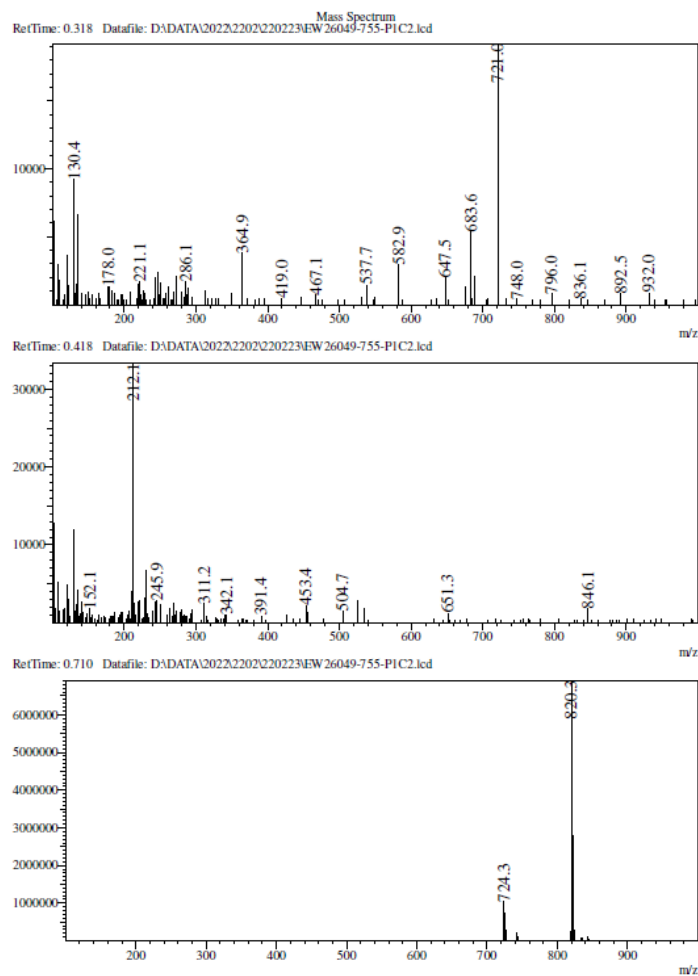

<sup>1</sup>H NMR [(1*R*,2*R*,3*S*,4*R*)-4-(4-Aminopyrrolo[2,3-*d*]pyrimidin-7-yl)-2,3-bis [[tert-butyl(diphenyl)silyl]oxy]cyclopentyl)methyl methanesulfonate (**60b**)

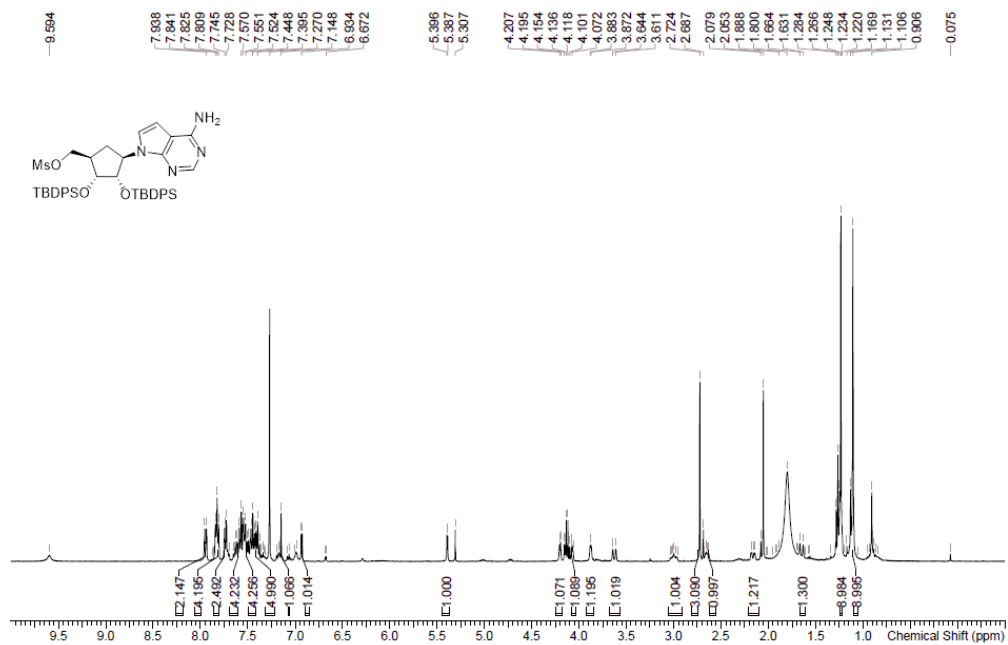



**<sup>1</sup>H NMR** 9-[(1*R*,2*S*,3*R*,4*S*)-4-(1,3-benzothiazol-2-ylsulfanylmethyl)-2,3-bis[[*tert*-butyl(diphenyl)silyl]oxy]cyclopentyl]purin-6-amine (**61a**)

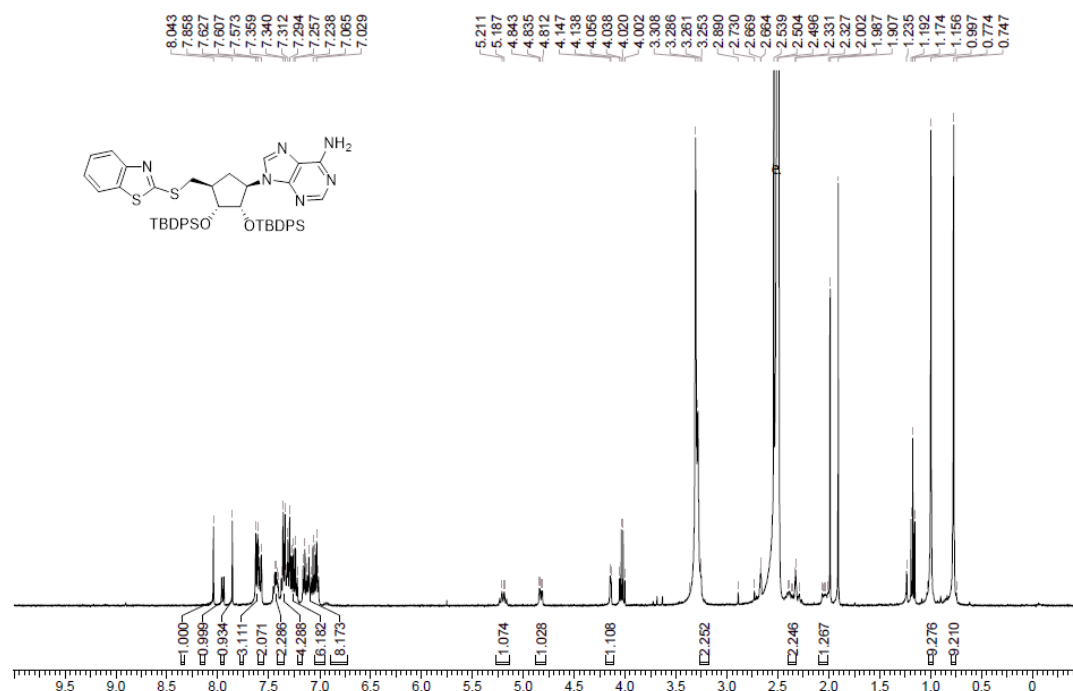

**LCMS** 9-[(1*R*,2*S*,3*R*,4*S*)-4-(1,3-benzothiazol-2-ylsulfanylmethyl)-2,3-bis[[*tert*-butyl(diphenyl)silyl]oxy]cyclopentyl]purin-6-amine (**61a**)

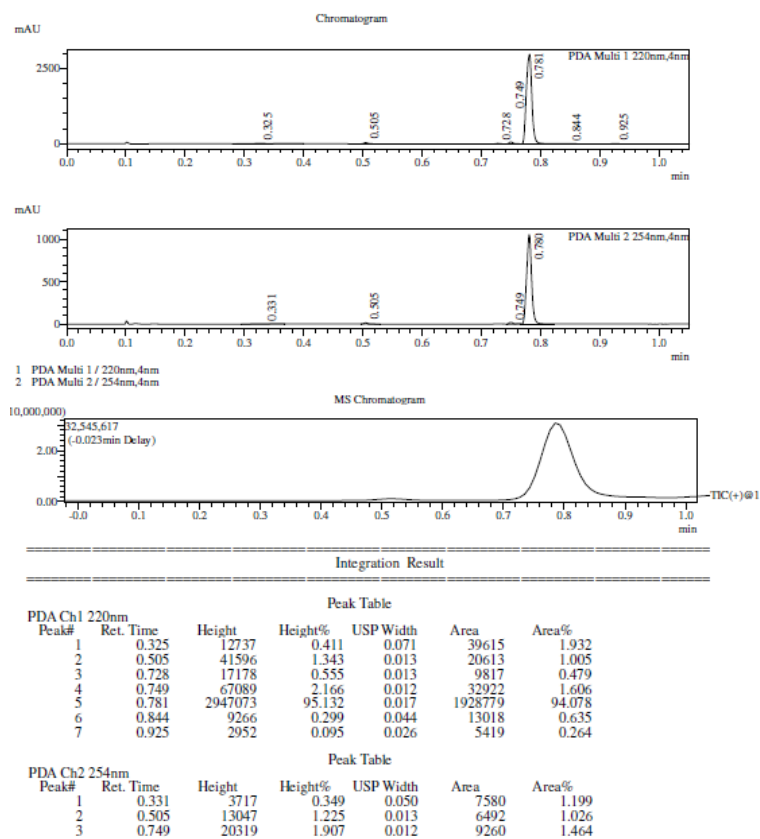

Mass Spectrum  
RetTime: 0.327 Datafile: D:\DATA\2022\2202\220225\EW 26049-759-P1S1.lcd

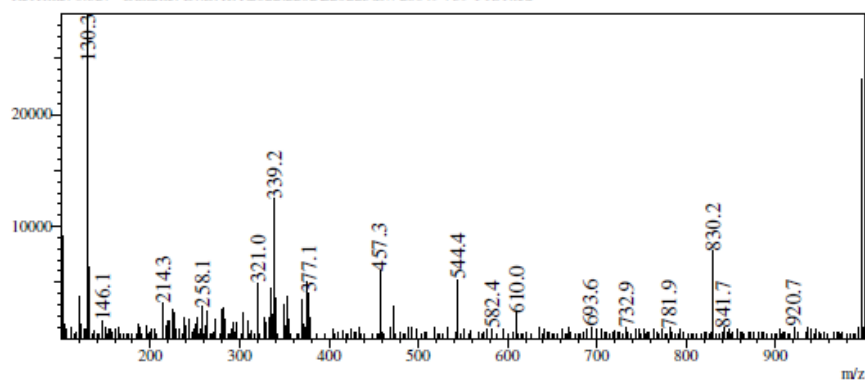

RetTime: 0.502 Datafile: D:\DATA\2022\2202\220225\EW 26049-759-P1S1.lcd

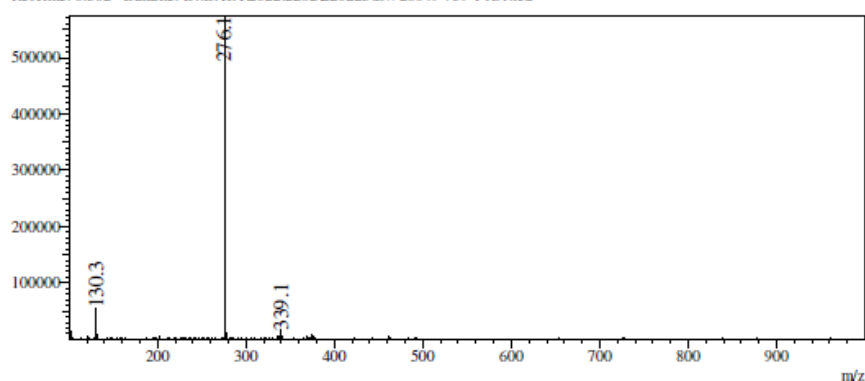

RetTime: 0.727 Datafile: D:\DATA\2022\2202\220225\EW 26049-759-P1S1.lcd

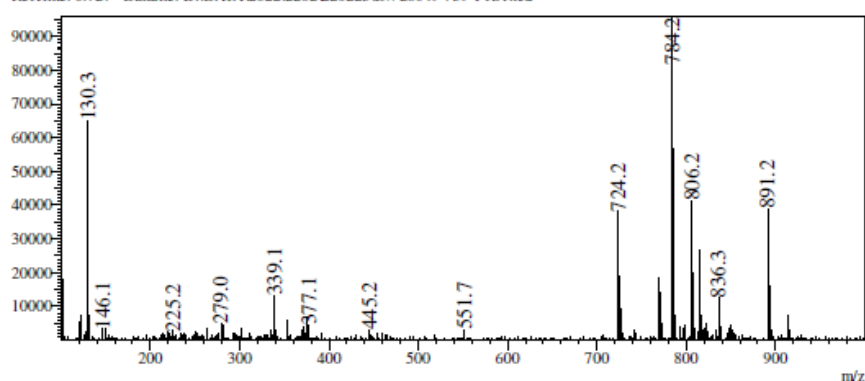

RetTime: 0.752 Datafile: D:\DATA\2022\2202\220225\EW 26049-759-P1S1.lcd

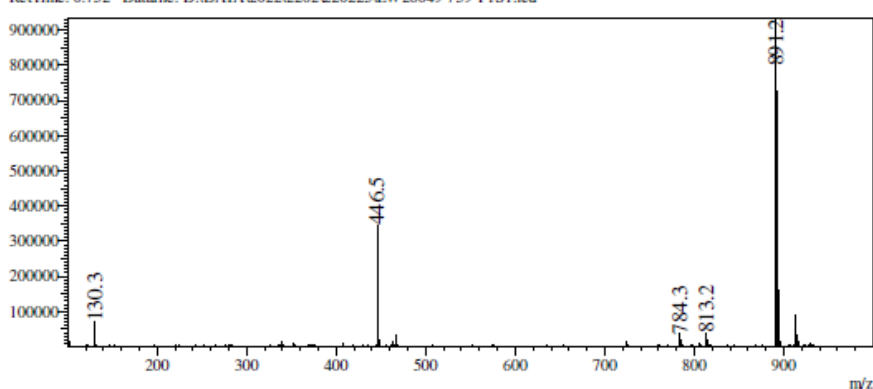

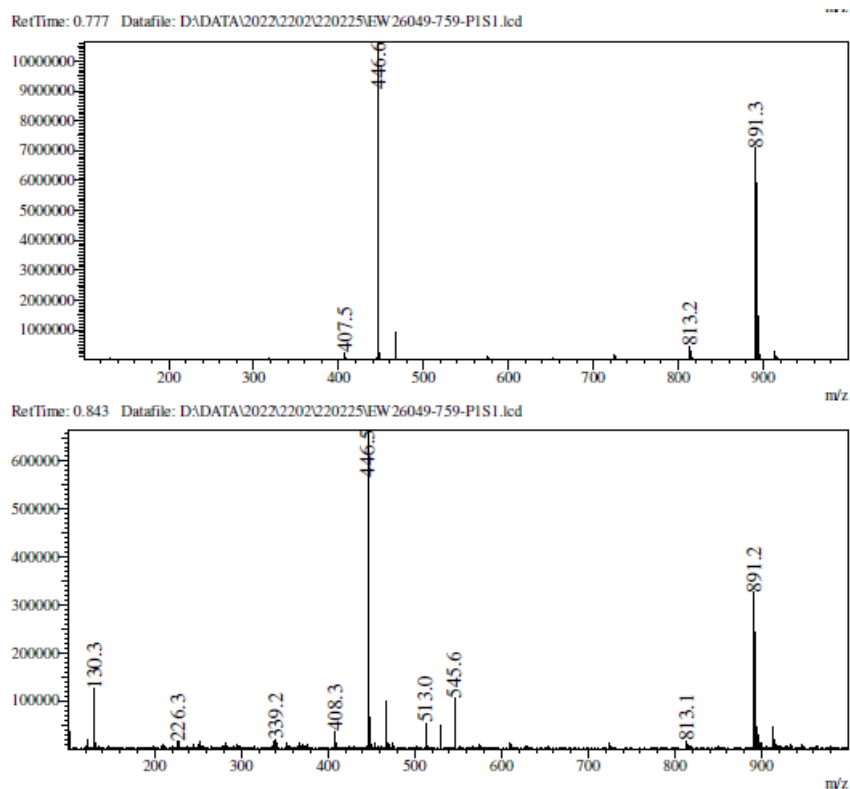

**LCMS 7-[(1*R*,2*S*,3*R*,4*S*)-4-(1,3-benzothiazol-2-ylsulfanylmethyl)-2,3-bis [[tert-butyl(diphenyl)silyl]oxy]cyclopentyl]pyrrolo[2,3-*d*]pyrimidin-4-amine (**61b**)**

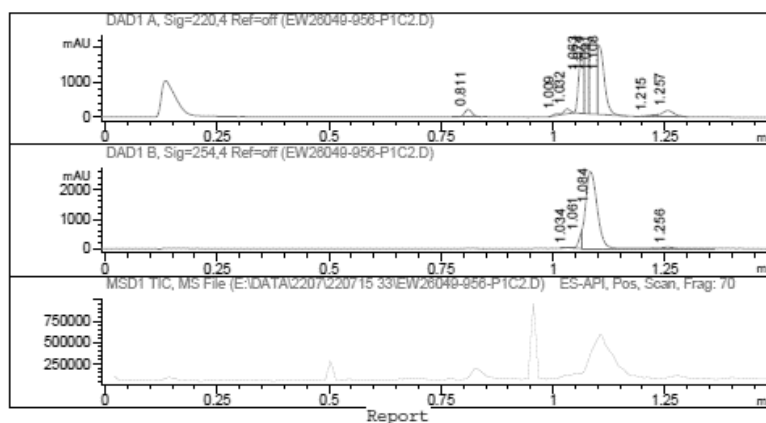

=====

Signal 1 : DAD1 A, Sig=220,4 Ref=off

| # | Meas. Ret. | Height   | Width | Area     | Area % |
|---|------------|----------|-------|----------|--------|
| 1 | 0.811      | 220.230  | 0.018 | 251.464  | 3.125  |
| 2 | 1.009      | 51.364   | 0.013 | 43.223   | 0.537  |
| 3 | 1.032      | 138.683  | 0.016 | 135.898  | 1.689  |
| 4 | 1.063      | 1823.765 | 0.013 | 1461.010 | 18.156 |
| 5 | 1.074      | 2049.824 | 0.009 | 1394.962 | 17.335 |
| 6 | 1.091      | 2155.928 | 0.016 | 2324.598 | 28.888 |
| 7 | 1.108      | 1817.417 | 0.017 | 2049.738 | 25.472 |
| 8 | 1.215      | 35.014   | 0.026 | 66.348   | 0.825  |
| 9 | 1.257      | 178.943  | 0.027 | 319.715  | 3.973  |

-----

Signal 2 : DAD1 B, Sig=254,4 Ref=off

| # | Meas. Ret. | Height   | Width | Area     | Area % |
|---|------------|----------|-------|----------|--------|
| 1 | 1.034      | 21.738   | 0.017 | 23.470   | 0.467  |
| 2 | 1.061      | 459.130  | 0.008 | 245.248  | 4.878  |
| 3 | 1.084      | 2601.377 | 0.028 | 4643.146 | 92.361 |
| 4 | 1.256      | 44.536   | 0.036 | 115.307  | 2.294  |

-----

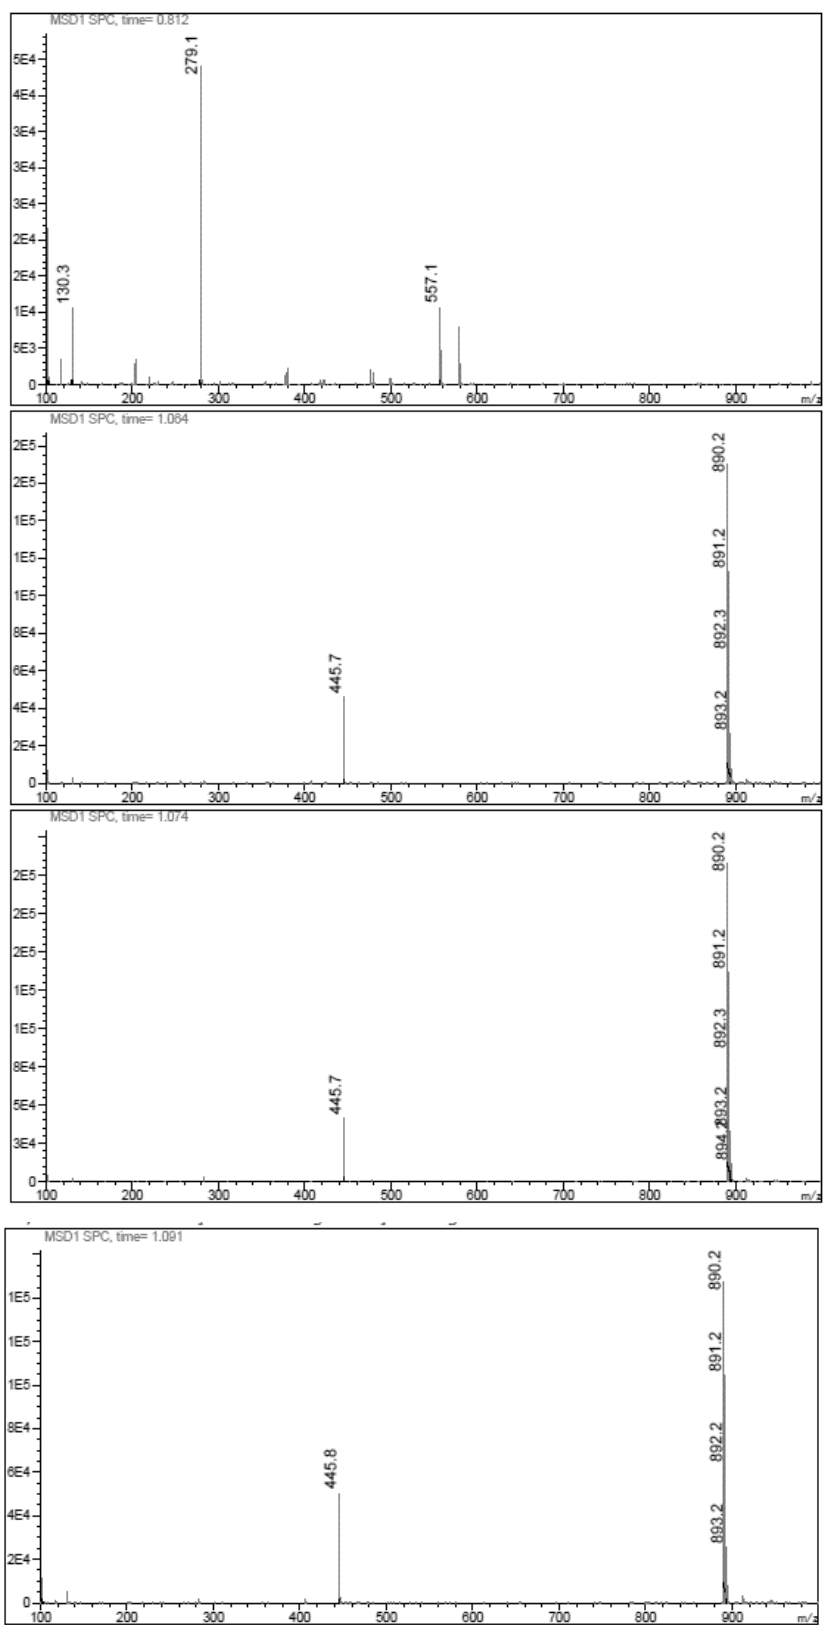

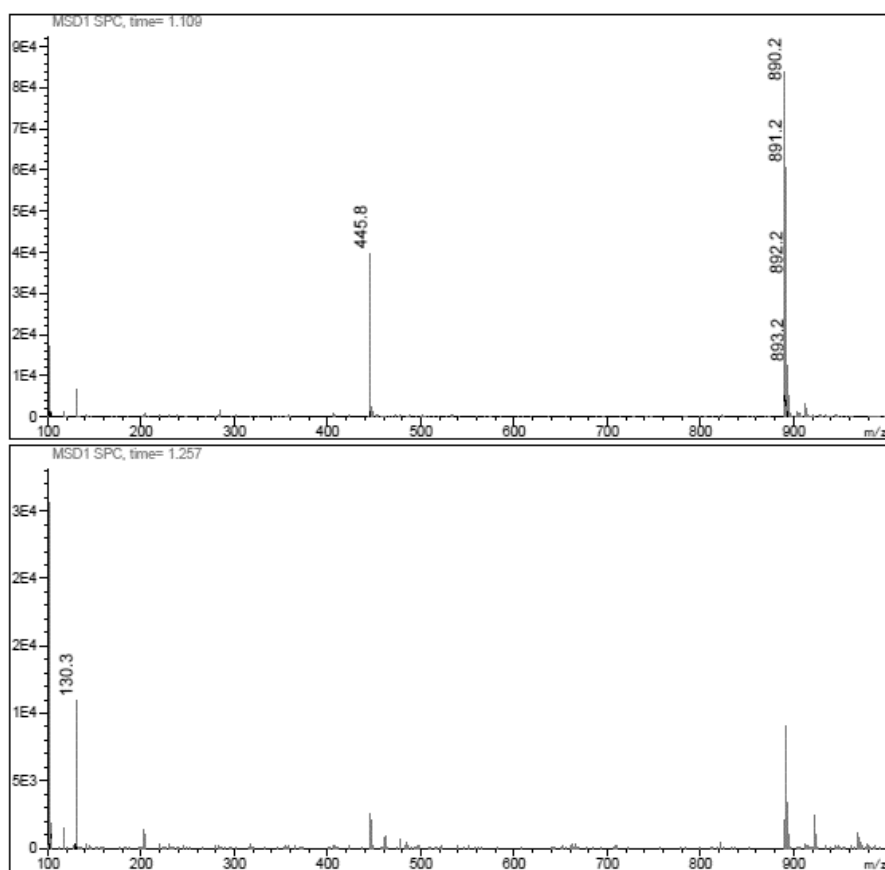

$^1\text{H}$  NMR (1*R*,2*S*,3*R*,5*S*)-3-(6-aminopurin-9-yl)-5-(1,3-benzothiazol-2-ylsulfanylmethyl) cyclopentane-1,2-diol (**26**)

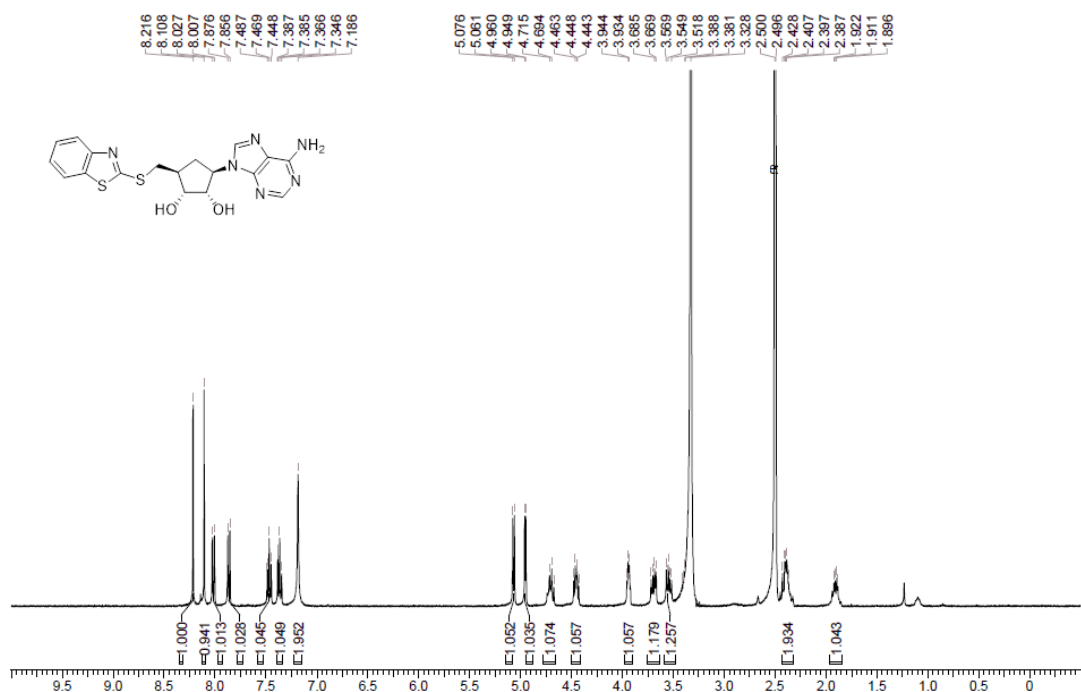

$^{13}\text{C}$  NMR (1*R*,2*S*,3*R*,5*S*)-3-(6-aminopurin-9-yl)-5-(1,3-benzothiazol-2-ylsulfanylmethyl) cyclopentane-1,2-diol (**26**)

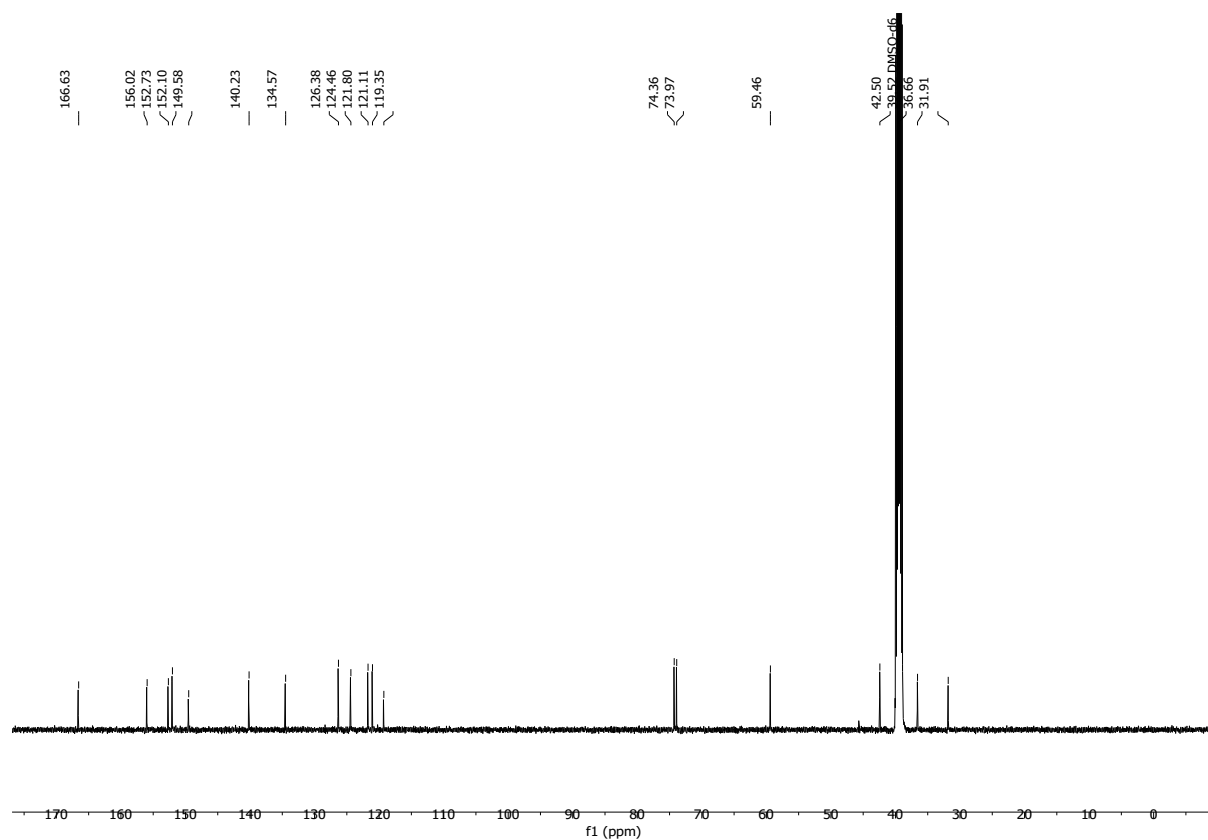

# **HPLC (1*R*,2*S*,3*R*,5*S*)-3-(6-aminopurin-9-yl)-5-(1,3-benzothiazol-2-ylsulfanylmethyl) cyclopentane-1,2-diol (**26**)**

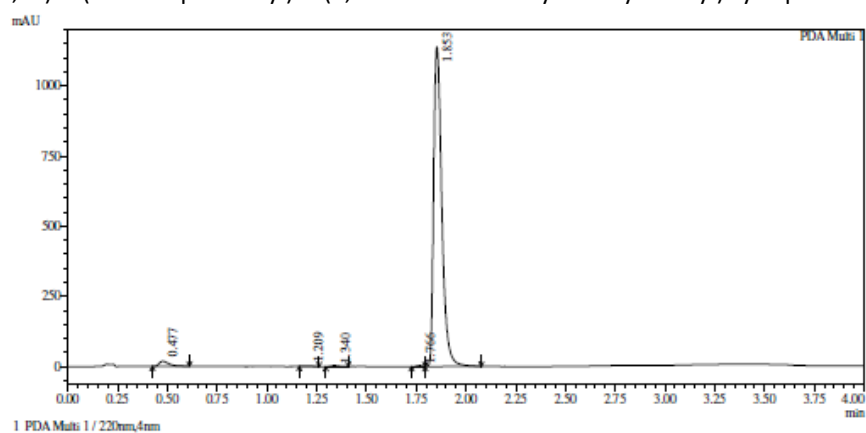

## Integration result

| PeakTable |           |           |            |         |         |         |
|-----------|-----------|-----------|------------|---------|---------|---------|
| Peak#     | Ret. Time | USP Width | Resolution | Height  | Area    | Area %  |
| 1         | 0.477     | 0.085     | 0.000      | 18134   | 61258   | 1.834   |
| 2         | 1.209     | 0.087     | 8.511      | 972     | 3238    | 0.097   |
| 3         | 1.340     | 0.073     | 1.643      | 3527    | 9774    | 0.293   |
| 4         | 1.766     | 0.150     | 3.809      | 3712    | 9135    | 0.274   |
| 5         | 1.853     | 0.072     | 0.786      | 1139604 | 3256019 | 97.502  |
| Total     |           |           |            | 1165949 | 3339423 | 100.000 |

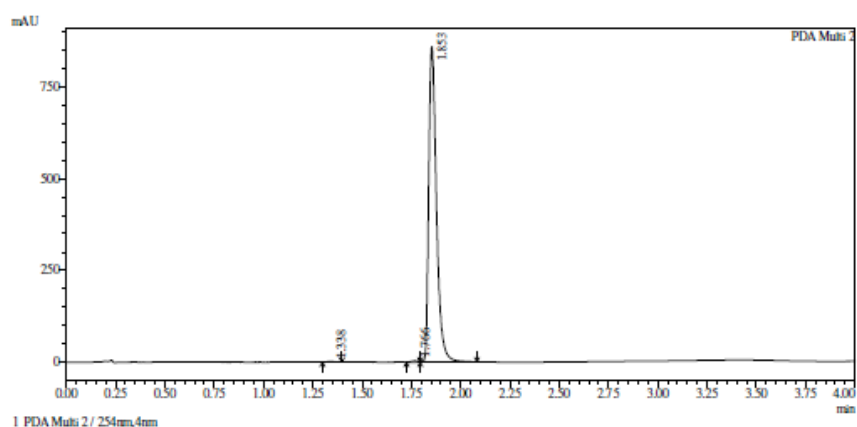

# Integration result

| PDA Ch2 254nm |           | PeakTable |            |        |         |         |
|---------------|-----------|-----------|------------|--------|---------|---------|
| Peak#         | Ret. Time | USPWidth  | Resolution | Height | Area    | Area %  |
| 1             | 1.338     | 0.070     | 0.000      | 1558   | 4177    | 0.177   |
| 2             | 1.766     | 0.083     | 5.598      | 3563   | 8857    | 0.375   |
| 3             | 1.853     | 0.069     | 1.142      | 858441 | 2350682 | 99.449  |
| Total         |           |           |            | 863562 | 2363716 | 100.000 |

**HRMC (1*R*,2*S*,3*R*,5*S*)-3-(6-aminopurin-9-yl)-5-(1,3-benzothiazol-2-ylsulfanylmethyl) cyclopentane-1,2-diol (26)**

Compound Table

| Label                          | Tgt Score | Mass Error (ppm) | Tgt Formula      | Obs. RT | Ref. Mass | Obs. Mass |
|--------------------------------|-----------|------------------|------------------|---------|-----------|-----------|
| Cpd 1: C18 H18 N6 O2 S2; 1.843 | 98.45     | 3.29             | C18 H18 N6 O2 S2 | 1.843   | 414.0933  | 414.0946  |

| Obs. m/z | Obs. RT | Obs. Mass | Tgt Formula      | Tgt Mass | Tgt Mass Error (ppm) | Find Cpd's Algorithm |
|----------|---------|-----------|------------------|----------|----------------------|----------------------|
| 437.0826 | 1.843   | 414.0946  | C18 H18 N6 O2 S2 | 414.0933 | 3.29                 | Find by Formula      |

Compound Chromatograms

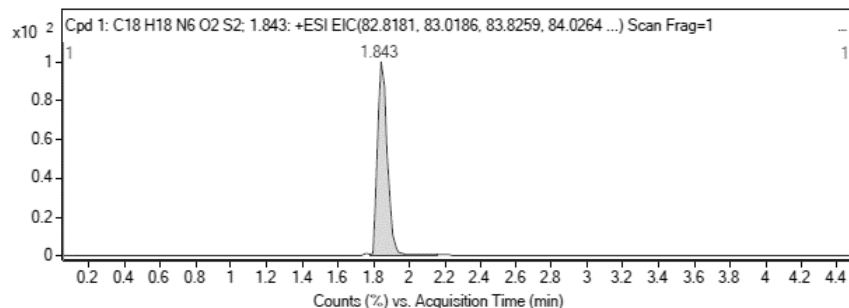

MS Zoomed Spectrum

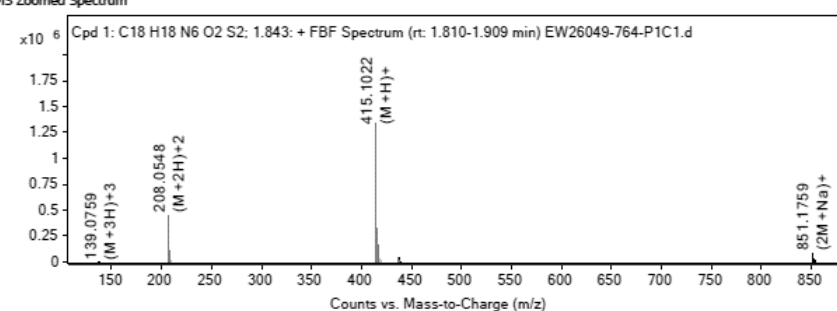

MS Spectrum Peak List

| Obs. m/z | Charge | Abund     | Ion/Isotope |
|----------|--------|-----------|-------------|
| 208.0548 | 2      | 453201.69 | (M+2H)+2    |
| 208.5559 | 2      | 107129.74 | (M+2H)+2    |

|          |   |            |          |
|----------|---|------------|----------|
| 209.0538 | 2 | 54589.17   | (M+2H)+2 |
| 415.1022 | 1 | 1340788.38 | (M+H)+   |
| 416.1039 | 1 | 324647.41  | (M+H)+   |
| 417.0994 | 1 | 154169.38  | (M+H)+   |
| 437.0826 | 1 | 42784.64   | (M+Na)+  |
| 851.1759 | 1 | 81445.9    | (2M+Na)+ |
| 852.1782 | 1 | 36897.6    | (2M+Na)+ |
| 853.1748 | 1 | 23124.36   | (2M+Na)+ |

MS Zoomed Spectrum

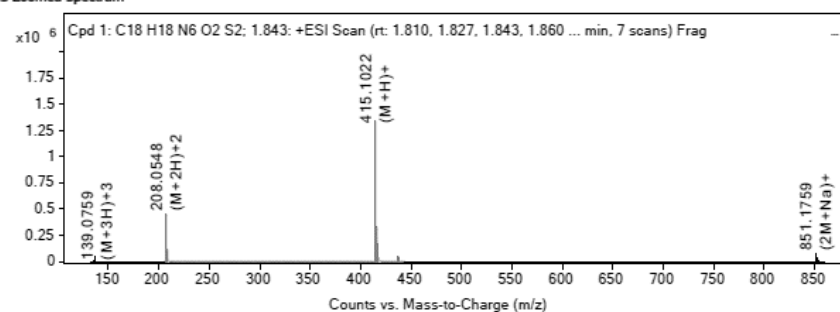

MS Spectrum Peak List

| Obs. m/z | Charge | Abund      | Ion/Isotope | Tgt Mass Error (ppm) |
|----------|--------|------------|-------------|----------------------|
| 208.0548 | 2      | 453201.69  | (M+2H)+2    | -4.05                |
| 208.5559 | 2      | 107129.74  | (M+2H)+2    | -3.25                |
| 209.0538 | 2      | 54589.17   | (M+2H)+2    | -2.85                |
| 415.1022 | 1      | 1340788.38 | (M+H)+      | -4                   |
| 416.1039 | 1      | 324647.41  | (M+H)+      | -2.04                |
| 417.0994 | 1      | 154169.38  | (M+H)+      | -1.77                |
| 437.0826 | 1      | 42784.64   | (M+Na)+     | -0.35                |
| 851.1759 | 1      | 81445.9    | (2M+Na)+    | -0.17                |
| 852.1782 | 1      | 36897.6    | (2M+Na)+    | 0.07                 |
| 853.1748 | 1      | 23124.36   | (2M+Na)+    | 0.44                 |

--- End Of Report ---

<sup>1</sup>H NMR (1R,2S,3R,5S)-3-(4-Aminopyrrolo[2,3-d]pyrimidin-7-yl)-5-ylsulfanylmethyl)cyclopentane-1,2-diol (**28**) (1,3-benzothiazol-2



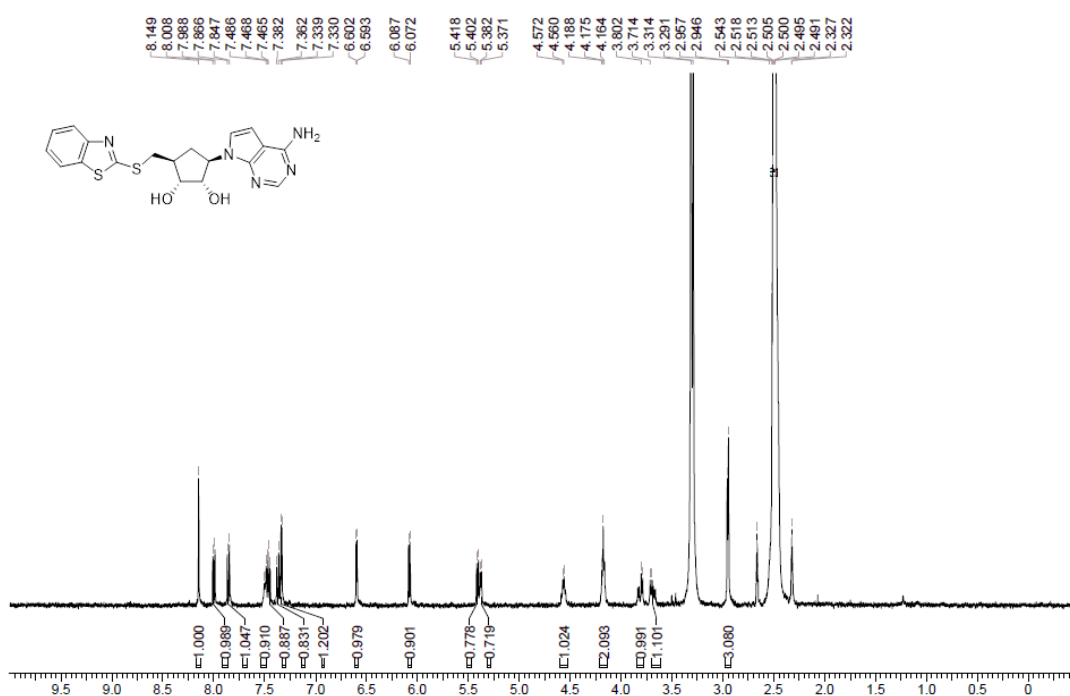

**HPLC** (1*R*,2*S*,3*R*,5*S*)-3-(4-Aminopyrrolo[2,3-d]pyrimidin-7-yl)-5-ylsulfanylmethyl)cyclopentane-1,2-diol (**28**) (1,3-benzothiazol-2

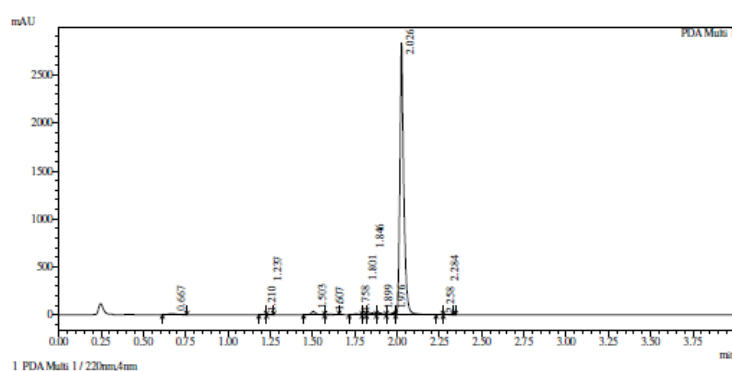

Integration result

| PeakTable |           |           |            |         |         |         |
|-----------|-----------|-----------|------------|---------|---------|---------|
| Peak#     | Ret. Time | USP Width | Resolution | Height  | Area    | Area %  |
| 1         | 0.667     | 0.086     | 0.000      | 10725   | 34642   | 0.722   |
| 2         | 1.210     | 0.068     | 7.060      | 1283    | 2158    | 0.045   |
| 3         | 1.237     | 0.310     | 0.144      | 869     | 1163    | 0.024   |
| 4         | 1.503     | 0.047     | 1.487      | 34428   | 61622   | 1.284   |
| 5         | 1.607     | 0.046     | 2.249      | 5755    | 9737    | 0.203   |
| 6         | 1.758     | 0.058     | 2.878      | 9308    | 20233   | 0.422   |
| 7         | 1.801     | 0.221     | 0.311      | 2374    | 3026    | 0.063   |
| 8         | 1.846     | 0.050     | 0.333      | 21108   | 38373   | 0.800   |
| 9         | 1.899     | 0.051     | 1.039      | 19016   | 35022   | 0.730   |
| 10        | 1.976     | 0.070     | 1.288      | 20050   | 37761   | 0.787   |
| 11        | 2.026     | 0.041     | 0.895      | 2835412 | 4545369 | 94.742  |
| 12        | 2.258     | 0.079     | 3.878      | 2674    | 4127    | 0.086   |
| 13        | 2.284     | 0.102     | 0.289      | 2500    | 4376    | 0.091   |
| Total     |           |           |            | 2965502 | 4797608 | 100.000 |

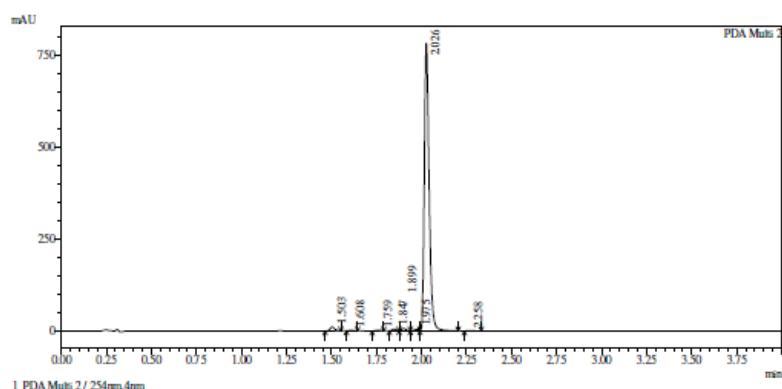

#### Integration result

| Peak# | Ret. Time | USP Width | Resolution | Height | Area    | Area %  |
|-------|-----------|-----------|------------|--------|---------|---------|
| 1     | 1.503     | 0.047     | 0.000      | 10837  | 18901   | 1.257   |
| 2     | 1.608     | 0.045     | 2.296      | 1779   | 2827    | 0.188   |
| 3     | 1.759     | 0.050     | 3.178      | 1918   | 3515    | 0.234   |
| 4     | 1.847     | 0.047     | 1.813      | 4866   | 8135    | 0.541   |
| 5     | 1.899     | 0.046     | 1.118      | 6456   | 10951   | 0.728   |
| 6     | 1.975     | 0.076     | 1.243      | 3751   | 7379    | 0.491   |
| 7     | 2.026     | 0.049     | 0.813      | 782552 | 1449925 | 96.431  |
| 8     | 2.258     | 0.076     | 3.738      | 606    | 1949    | 0.130   |
| Total |           |           |            | 812765 | 1503583 | 100.000 |

**HRMC** (1*R*,2*S*,3*R*,5*S*)-3-(4-Aminopyrrolo[2,3-*d*]pyrimidin-7-yl)-5-(1,3-benzothiazol-2-ylsulfanylmethyl)cyclopentane-1,2-diol (**28**)

#### Compound Table

| Label                          | Tgt Score | Mass Error (ppm) | Tgt Formula      | Obs. RT | Ref. Mass | Obs. Mass |
|--------------------------------|-----------|------------------|------------------|---------|-----------|-----------|
| Cpd 1: C19 H19 N5 O3 S2; 1.796 | 90.28     | -4.45            | C19 H19 N5 O3 S2 | 1.796   | 429.0929  | 429.091   |

| Obs. <i>m/z</i> | Obs. RT | Obs. Mass | Tgt Formula      | Tgt Mass | Tgt Mass Error (ppm) | Find Cpd's Algorithm |
|-----------------|---------|-----------|------------------|----------|----------------------|----------------------|
| 430.0987        | 1.796   | 429.091   | C19 H19 N5 O3 S2 | 429.0929 | -4.45                | Find by Formula      |

#### Compound Chromatograms

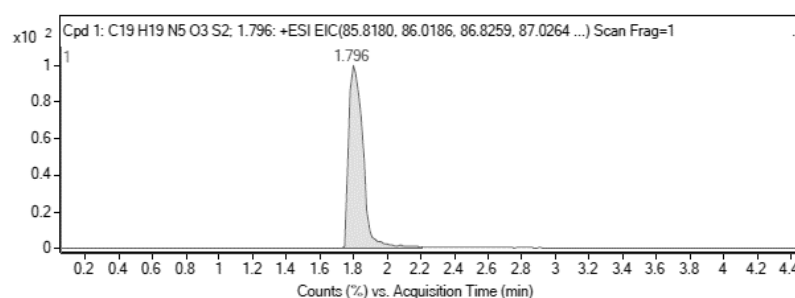

#### MS Zoomed Spectrum

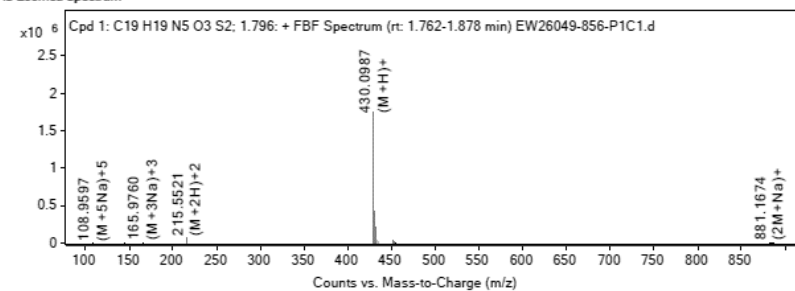

#### MS Spectrum Peak List

| Obs. <i>m/z</i> | Charge | Abund    | Ion/Isotope |
|-----------------|--------|----------|-------------|
| 215.5521        | 2      | 69571.91 | (M+2H)+2    |
| 216.0534        | 2      | 16955.47 | (M+2H)+2    |

|          |   |            |                       |
|----------|---|------------|-----------------------|
| 216.5517 | 2 | 8361.99    | (M+2H) <sup>+</sup> 2 |
| 430.0987 | 1 | 1749183.63 | (M+H) <sup>+</sup>    |
| 431.1005 | 1 | 431888.06  | (M+H) <sup>+</sup>    |
| 432.0961 | 1 | 211083.06  | (M+H) <sup>+</sup>    |
| 452.0787 | 1 | 29897.41   | (M+Na) <sup>+</sup>   |
| 453.0816 | 1 | 7462.57    | (M+Na) <sup>+</sup>   |
| 454.0776 | 1 | 3630.51    | (M+Na) <sup>+</sup>   |
| 881.1674 | 1 | 5226.82    | (2M+Na) <sup>+</sup>  |

MS Zoomed Spectrum

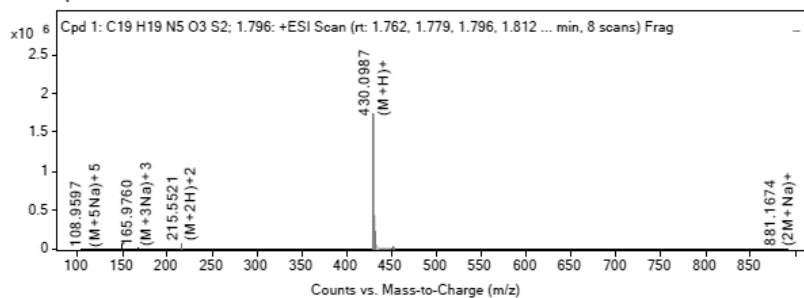

MS Spectrum Peak List

| Obs. m/z | Charge | Abund      | Ion/Isotope           | Tgt Mass Error (ppm) |
|----------|--------|------------|-----------------------|----------------------|
| 215.5521 | 2      | 69571.91   | (M+2H) <sup>+</sup> 2 | 7.53                 |
| 216.0534 | 2      | 16955.47   | (M+2H) <sup>+</sup> 2 | 7.88                 |
| 216.5517 | 2      | 8361.99    | (M+2H) <sup>+</sup> 2 | 3.3                  |
| 430.0987 | 1      | 1749183.63 | (M+H) <sup>+</sup>    | 3.33                 |
| 431.1005 | 1      | 431888.06  | (M+H) <sup>+</sup>    | 5.48                 |
| 432.0961 | 1      | 211083.06  | (M+H) <sup>+</sup>    | 5.65                 |
| 452.0787 | 1      | 29897.41   | (M+Na) <sup>+</sup>   | 7.57                 |
| 453.0816 | 1      | 7462.57    | (M+Na) <sup>+</sup>   | 7.08                 |
| 454.0776 | 1      | 3630.51    | (M+Na) <sup>+</sup>   | 6.48                 |
| 881.1674 | 1      | 5226.82    | (2M+Na) <sup>+</sup>  | 8.76                 |

— End Of Report —

<sup>1</sup>H NMR [(2R,3R,4R,5R)-3,4-Dibenzoyloxy-5-(4-chloropyrrolo[2,3-d] pyrimidin-7-yl)tetrahydrofuran-2-yl)methyl benzoate (**101**)

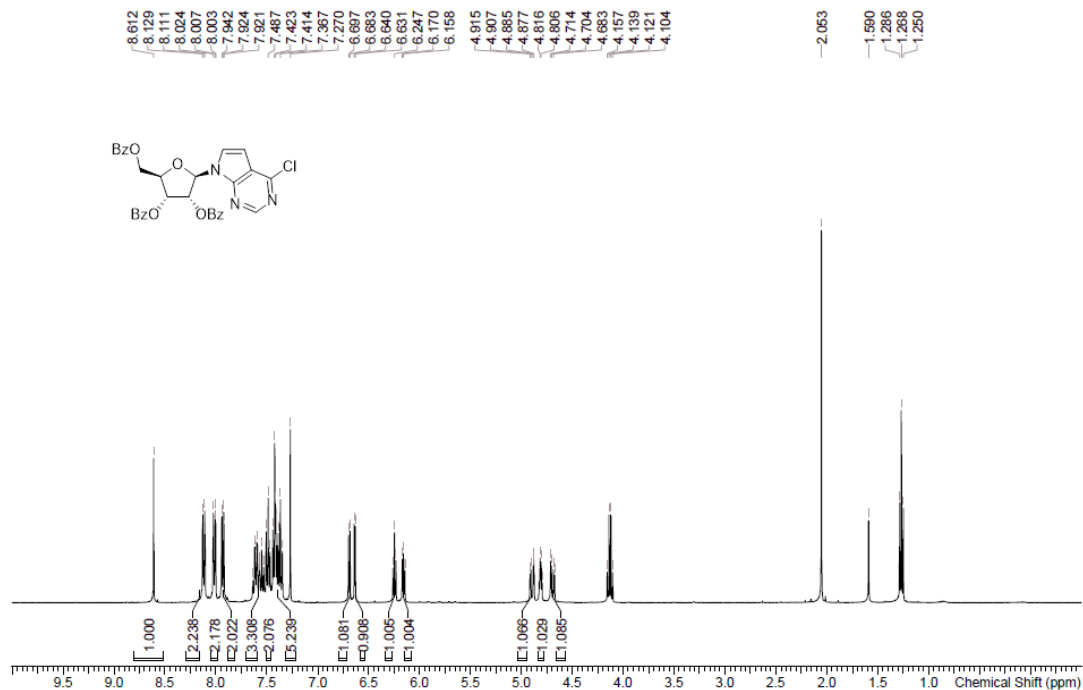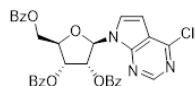

**LCMS** [(2*R*,3*R*,4*R*,5*R*)-3,4-Dibenzoyloxy-5-(4-chloropyrrolo[2,3-*d*] pyrimidin-7-yl)tetrahydrofuran-2-yl]methyl benzoate (**101**)

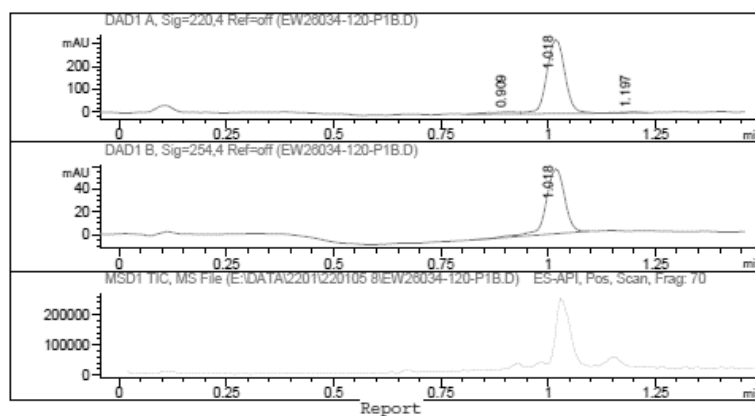

| Signal 1 : DAD1 A, Sig=220,4 Ref=off |            |         |       |         |        |
|--------------------------------------|------------|---------|-------|---------|--------|
| #                                    | Meas. Ret. | Height  | Width | Area    | Area % |
| 1                                    | 0.909      | 9.563   | 0.062 | 44.034  | 4.364  |
| 2                                    | 1.018      | 325.152 | 0.046 | 950.210 | 94.168 |
| 3                                    | 1.197      | 4.475   | 0.049 | 14.809  | 1.468  |

  

| Signal 2 : DAD1 B, Sig=254,4 Ref=off |            |        |       |         |         |
|--------------------------------------|------------|--------|-------|---------|---------|
| #                                    | Meas. Ret. | Height | Width | Area    | Area %  |
| 1                                    | 1.018      | 57.387 | 0.047 | 172.272 | 100.000 |

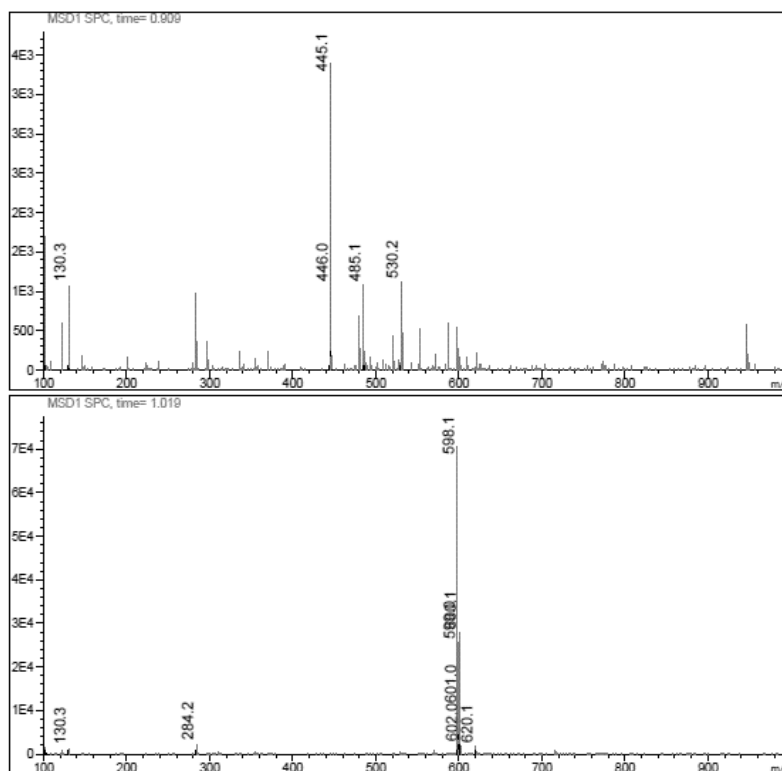

**LCMS (2*R*,3*R*,4*S*,5*R*)-2-(4-Aminopyrrolo[2,3-*d*]pyrimidin-7-yl)-5-(hydroxymethyl)tetrahydrofuran-3,4-diol (**102**)**

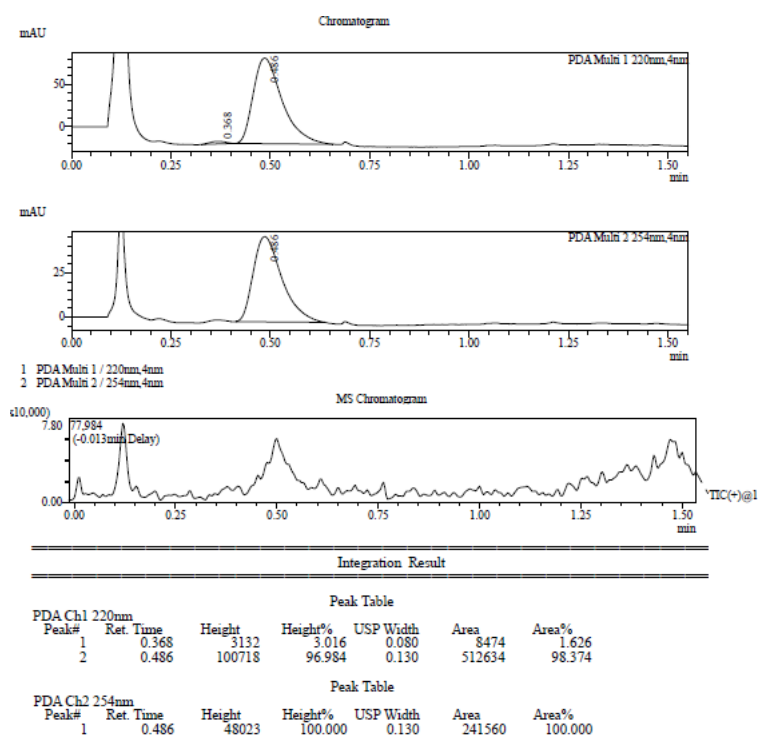

**<sup>1</sup>H NMR 7-[(2*R*,3*R*,4*R*,5*R*)-3,4-Bis[[tert-butyl(dimethyl)silyl]oxy]-5-[[tert-butyl(dimethyl)silyl]oxymethyl]tetrahydrofuran-2-yl]pyrrolo[2,3-*d*]pyrimidin-4-amine (**103**)**

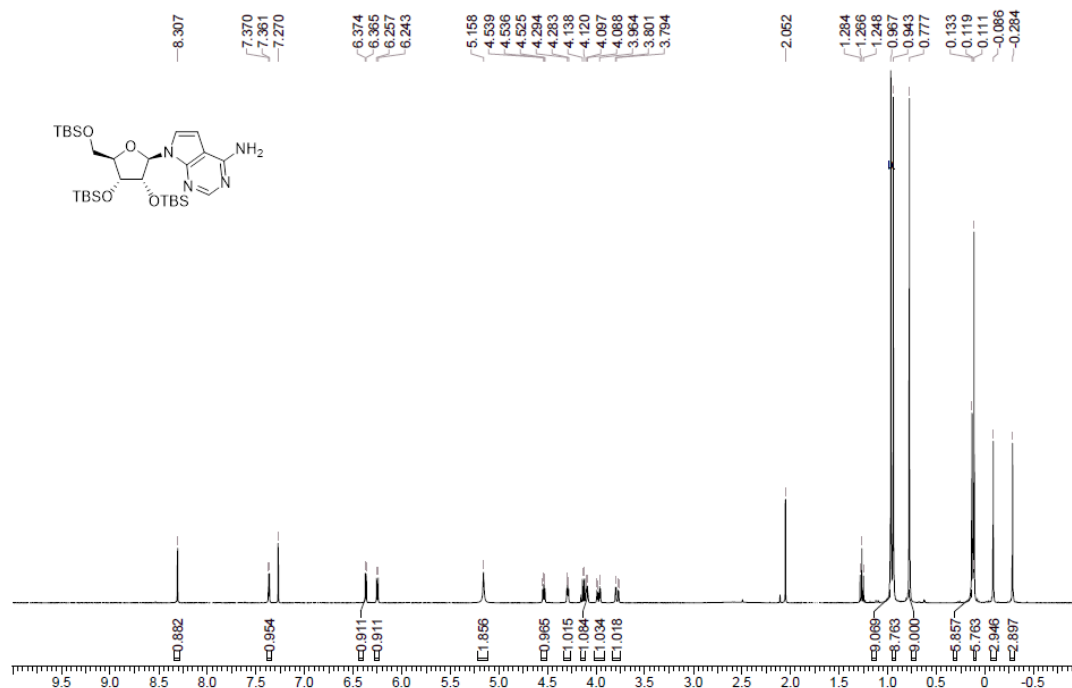

**LCMS 7-[(2*R*,3*R*,4*R*,5*R*)-3,4-Bis[[*tert*-butyl(dimethyl)silyl]oxy]-5-[[*tert*-butyl(dimethyl)silyl]oxymethyl]tetrahydrofuran-2-yl]pyrrolo[2,3-*d*]pyrimidin-4-amine (103)**

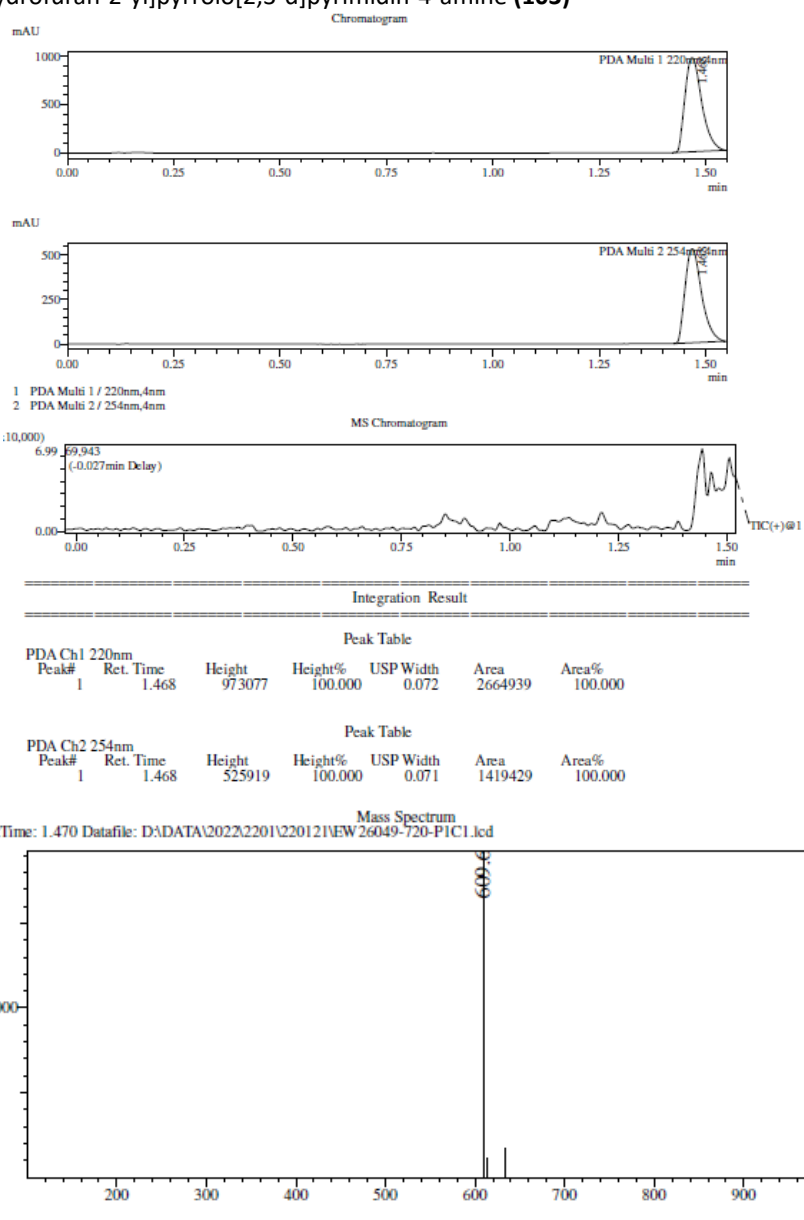

**<sup>1</sup>H NMR** [(2*R*,3*R*,4*R*,5*R*)-5-(4-Aminopyrrolo[2,3-*d*]pyrimidin-7-yl)-3,4-oxy]tetrahydrofuran-2-yl)methanol (**104**) bis[[tert-butyl(dimethyl)silyl]

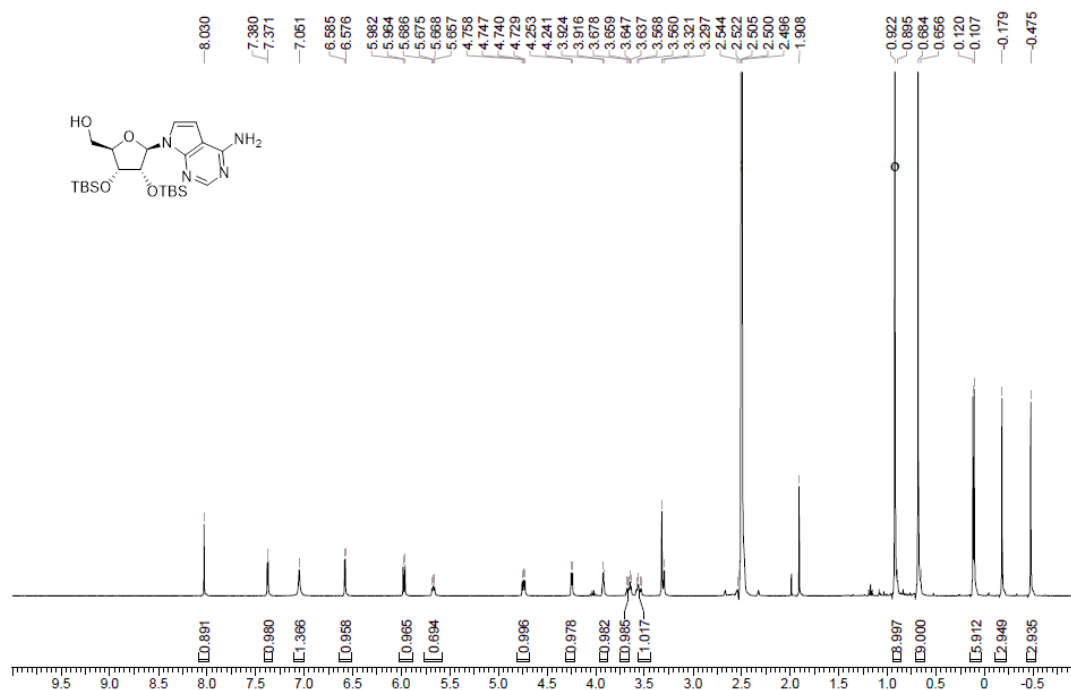

**LCMS** [(2*R*,3*R*,4*R*,5*R*)-5-(4-Aminopyrrolo[2,3-*d*]pyrimidin-7-yl)-3,4-oxy]tetrahydrofuran-2-yl)methanol (**104**) bis[[tert-butyl(dimethyl)silyl]

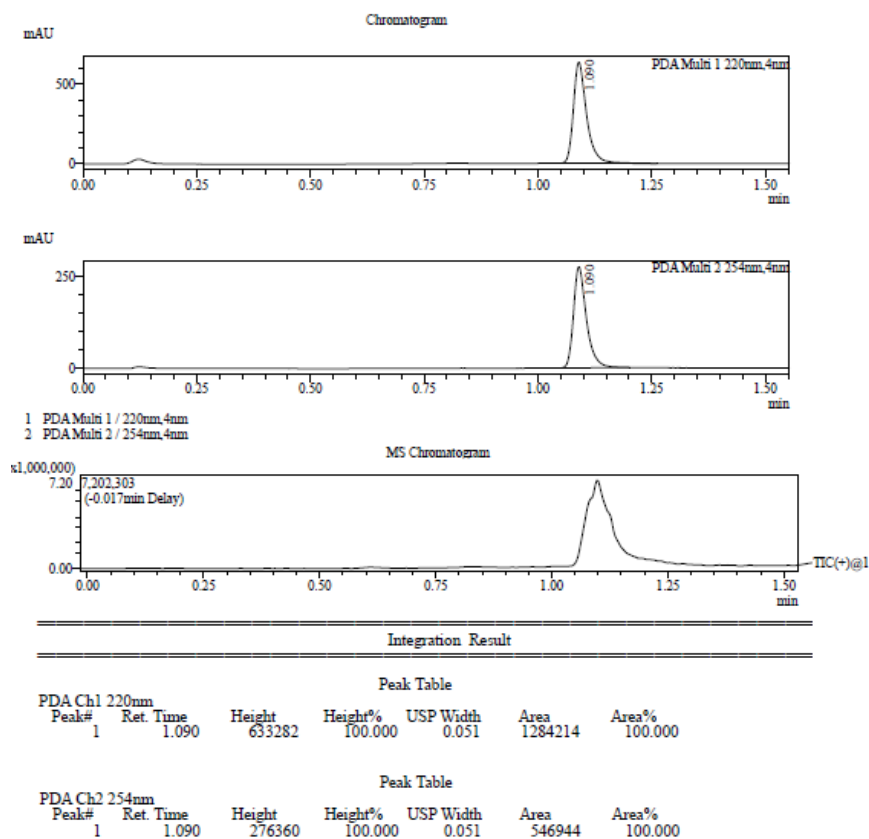

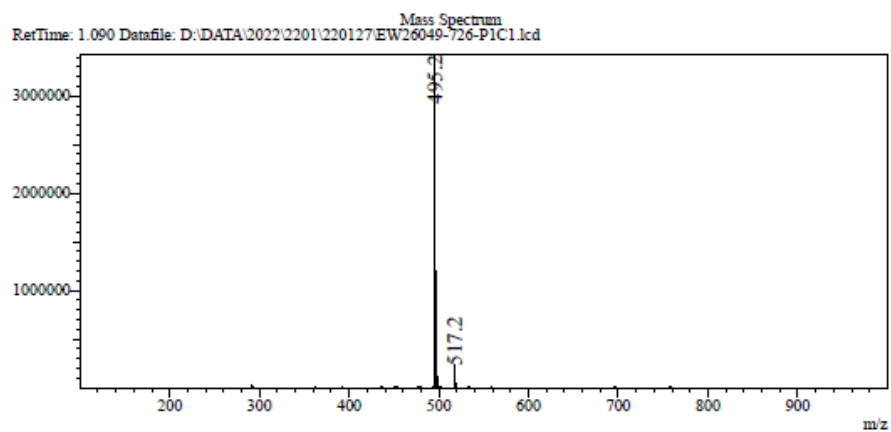

$^1\text{H}$  NMR ((2*R*,3*R*,4*R*,5*R*)-5-(4-Amino-7*H*-pyrrolo[2,3-*d*]pyrimidin-7-yl)-3,4-bis((tertbutyldimethylsilyl)oxy)tetrahydrofuran-2-yl)methyl methanesulfonate (**105**)

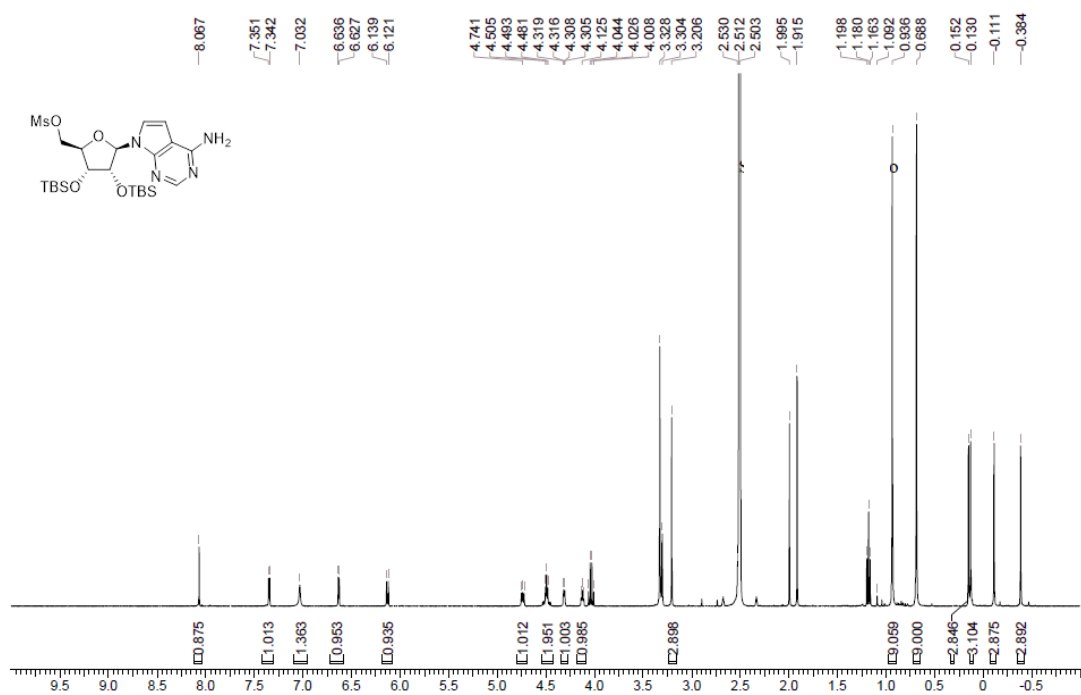



**LCMS ((2*R*,3*R*,4*R*,5*R*)-5-(4-Amino-7H-pyrrolo[2,3-*d*]pyrimidin-7-yl)-3,4-bis((tertbutyldimethylsilyl)oxy)tetrahydrofuran-2-yl)methyl methanesulfonate (105)**

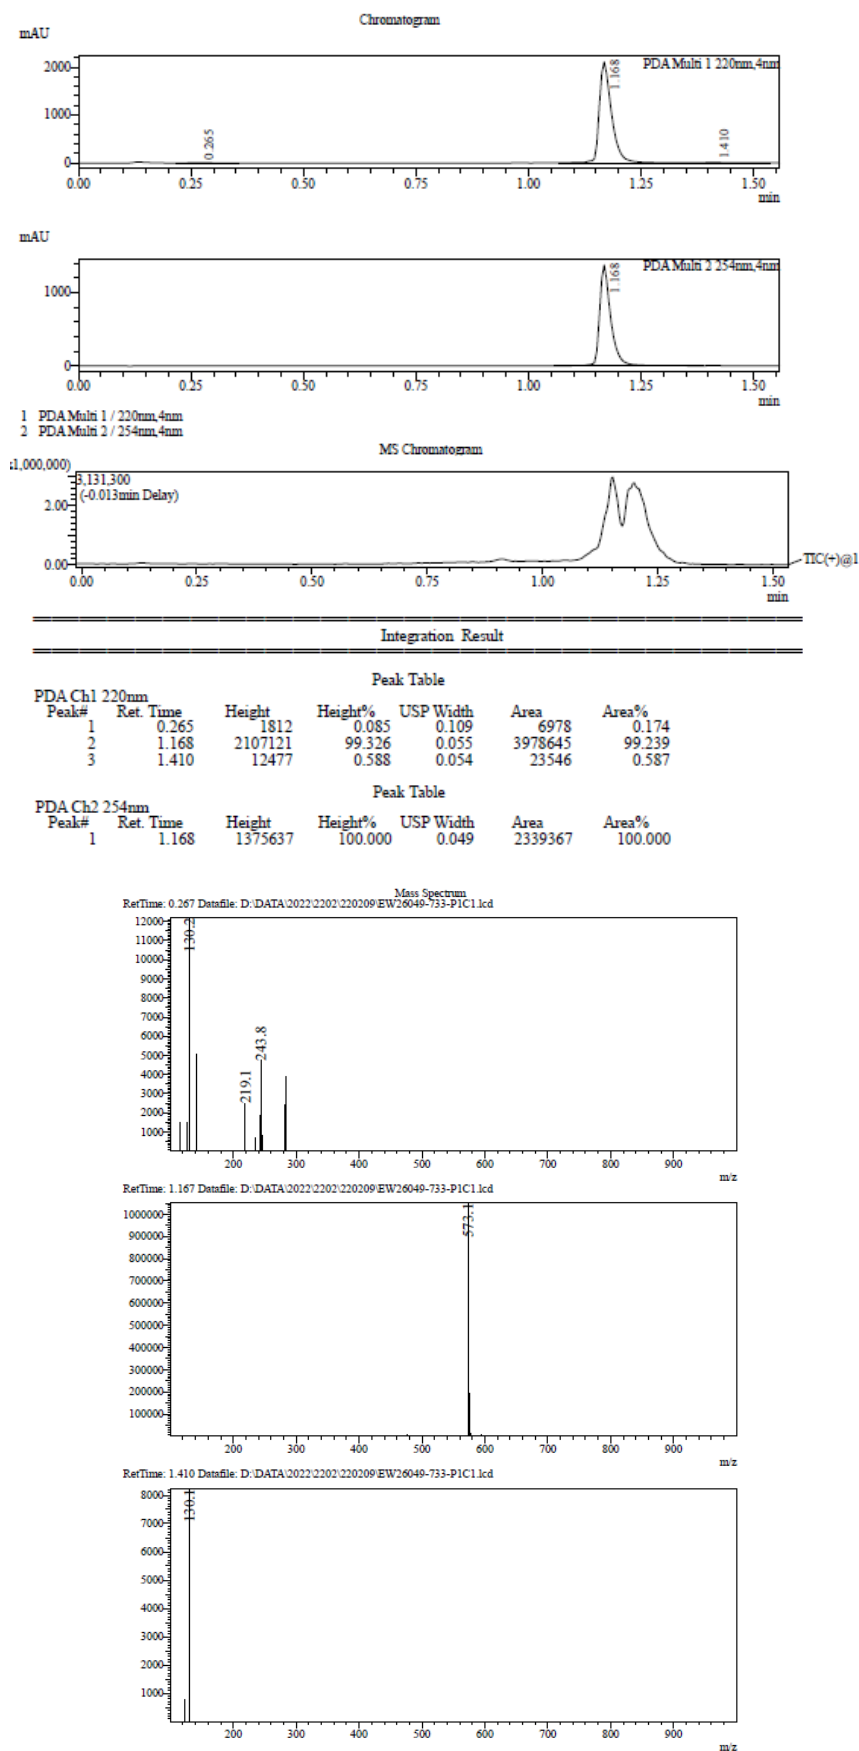

**<sup>1</sup>H NMR** 7-[(2*R*,3*R*,4*R*,5*S*)-5-(1,3-Benzothiazol-2-ylsulfanylmethyl)-3,4-bis silyl]oxy]tetrahydrofuran-2-yl]pyrrolo[2,3-*d*]pyrimidin-4-amine (**106**)

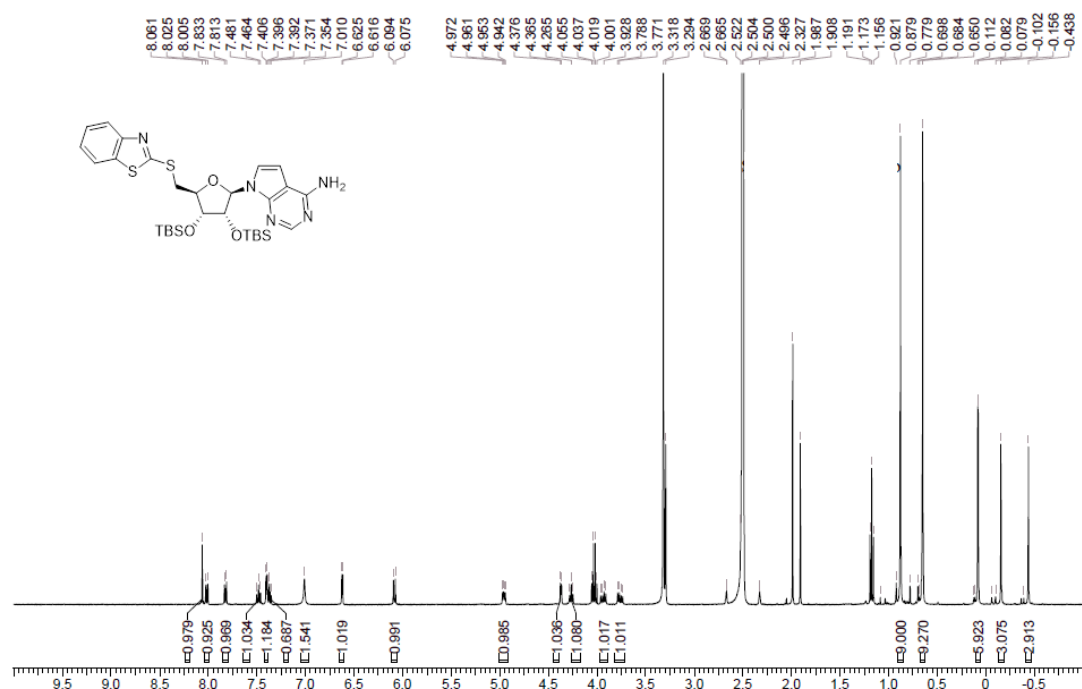

**LCMS** 7-[(2*R*,3*R*,4*R*,5*S*)-5-(1,3-Benzothiazol-2-ylsulfanylmethyl)-3,4-bis silyl]oxy]tetrahydrofuran-2-yl]pyrrolo[2,3-*d*]pyrimidin-4-amine (**106**)

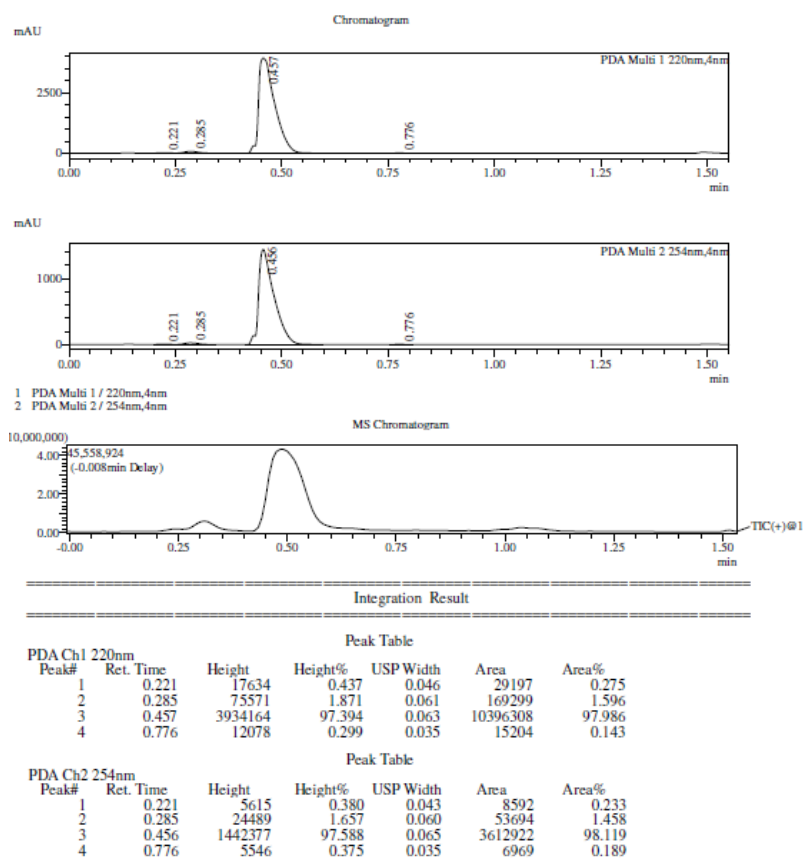

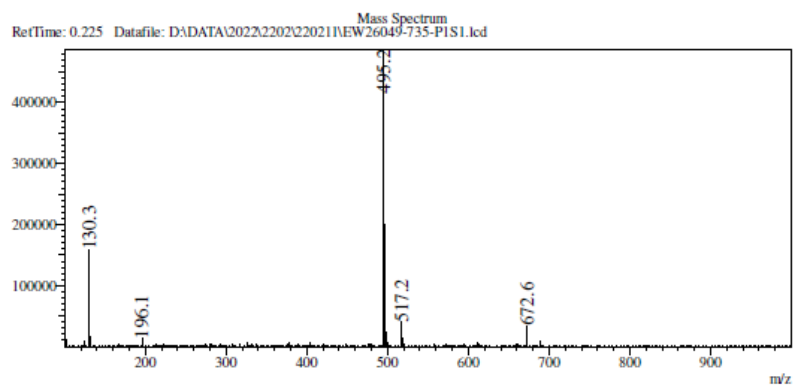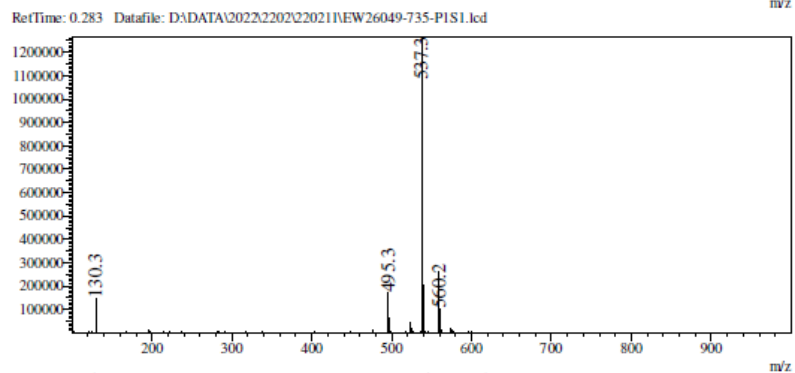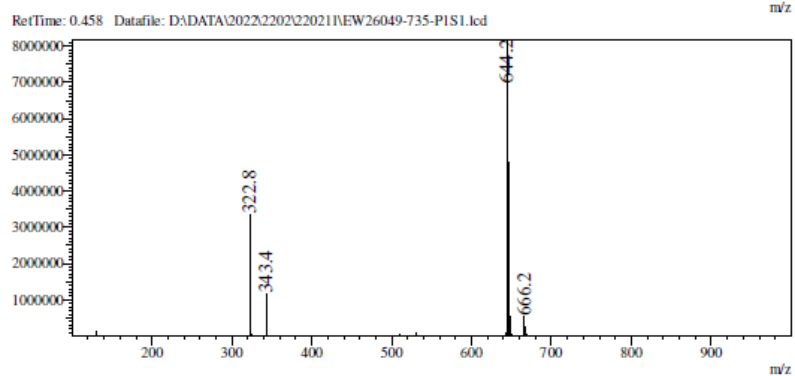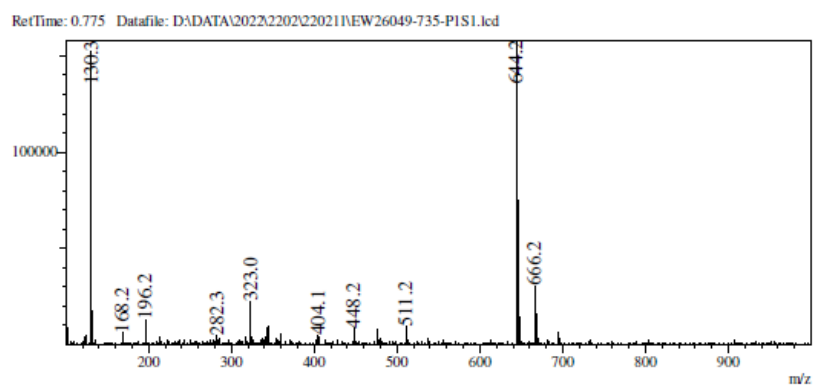

**<sup>1</sup>H NMR** (2*R*,3*R*,4*S*,5*S*)-2-(4-Aminopyrrolo[2,3-*d*]pyrimidin-7-yl)-5-(1,3-benzothiazol-2-ylsulfanylmethyl)tetrahydrofuran-3,4-diol (**27**)

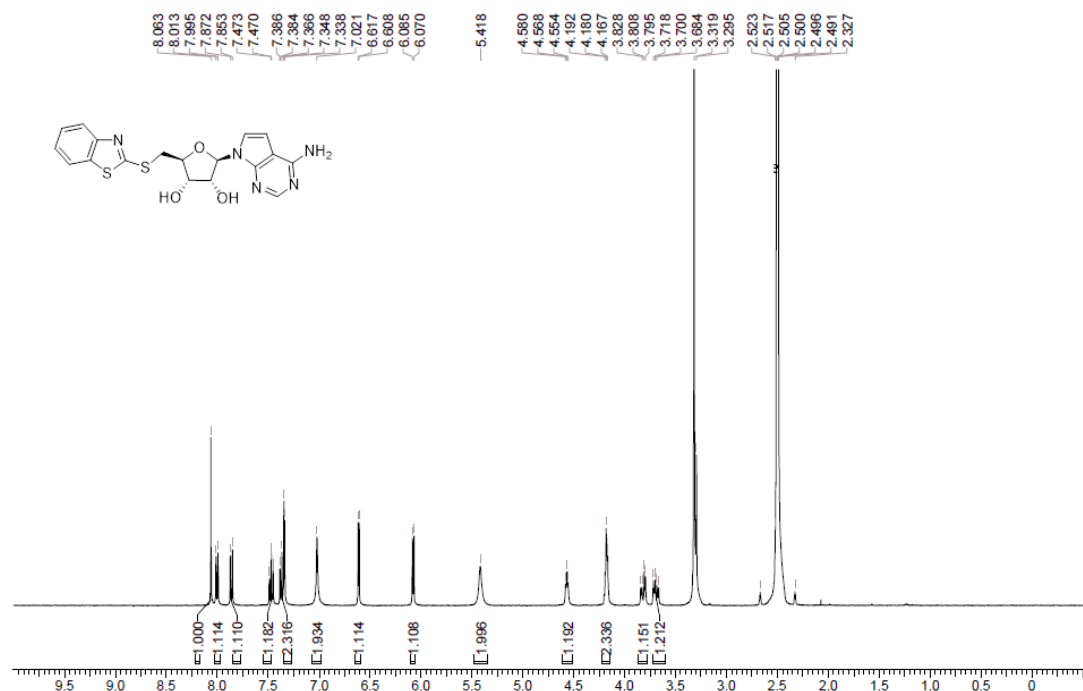

**HPLC** (2*R*,3*R*,4*S*,5*S*)-2-(4-Aminopyrrolo[2,3-*d*]pyrimidin-7-yl)-5-(1,3-benzothiazol-2-ylsulfanylmethyl)tetrahydrofuran-3,4-diol (**27**)

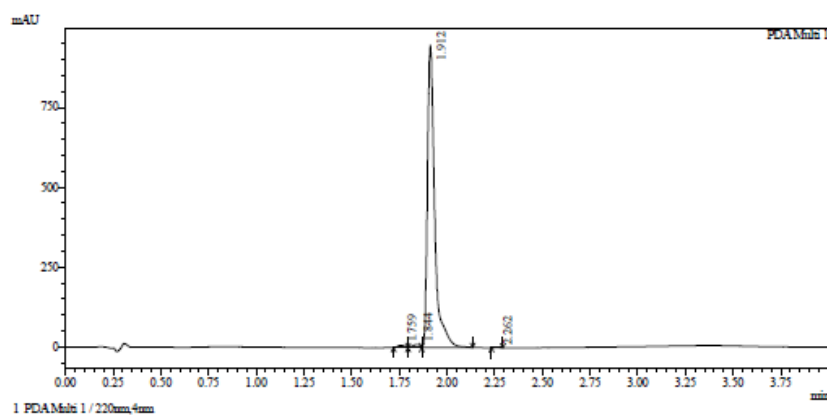

Integration result

PDA Ch1 220nm

PeakTable

| Peak# | Ret. Time | USP Width | Resolution | Height | Area    | Area %  |
|-------|-----------|-----------|------------|--------|---------|---------|
| 1     | 1.759     | 0.081     | 0.000      | 7310   | 20055   | 0.779   |
| 2     | 1.844     | 0.131     | 0.805      | 9365   | 29156   | 1.133   |
| 3     | 1.912     | 0.065     | 0.695      | 946992 | 2521889 | 98.012  |
| 4     | 2.262     | 0.056     | 5.755      | 914    | 1933    | 0.075   |
| Total |           |           |            | 964581 | 2573033 | 100.000 |

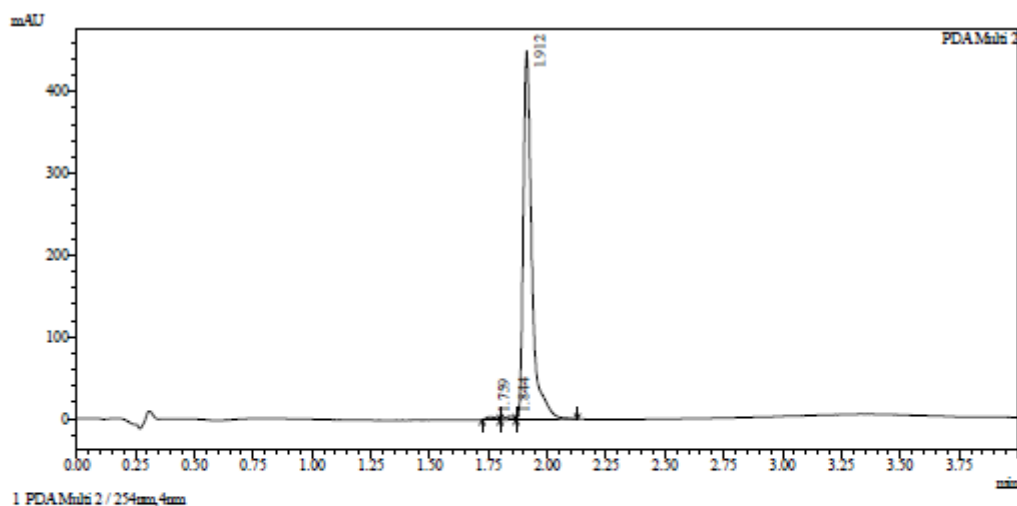

#### Integration result

| PeakTable     |           |           |            |        |         |         |
|---------------|-----------|-----------|------------|--------|---------|---------|
| PDA Ch2 254nm |           |           |            |        |         |         |
| Peak#         | Ret. Time | USP Width | Resolution | Height | Area    | Area %  |
| 1             | 1.759     | 0.078     | 0.000      | 3714   | 10596   | 0.909   |
| 2             | 1.844     | 0.170     | 0.688      | 3882   | 11969   | 1.027   |
| 3             | 1.912     | 0.063     | 0.582      | 450566 | 1143339 | 98.065  |
| Total         |           |           |            | 458161 | 1165904 | 100.000 |

**HRMC** (2*R*,3*R*,4*S*,5*S*)-2-(4-Aminopyrrolo[2,3-*d*]pyrimidin-7-yl)-5-(1,3-benzothiazol-2-ylsulfanylmethyl)tetrahydrofuran-3,4-diol (**27**)

| Label                          | Tgt Score | Mass Error (ppm) | Tgt Formula      | Obs. RT | Ref. Mass | Obs. Mass |
|--------------------------------|-----------|------------------|------------------|---------|-----------|-----------|
| Cpd 1: C18 H17 N5 O3 S2; 1.763 | 97.21     | 0.75             | C18 H17 N5 O3 S2 | 1.763   | 415.0773  | 415.0776  |

| Obs. <i>m/z</i> | Obs. RT | Obs. Mass | Tgt Formula      | Tgt Mass | Tgt Mass Error (ppm) | Find Cpd's Algorithm |
|-----------------|---------|-----------|------------------|----------|----------------------|----------------------|
| 438.0658        | 1.763   | 415.0776  | C18 H17 N5 O3 S2 | 415.0773 | 0.75                 | Find by Formula      |

#### Compound Chromatograms

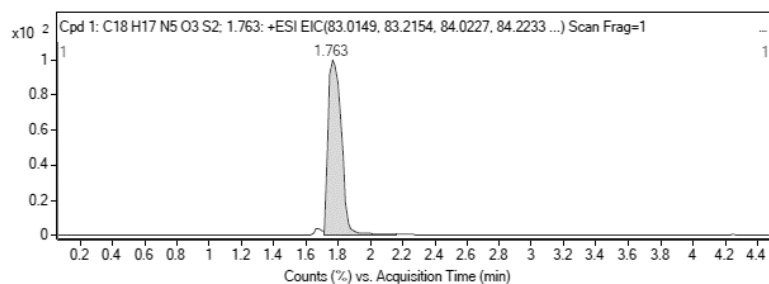

#### MS Zoomed Spectrum

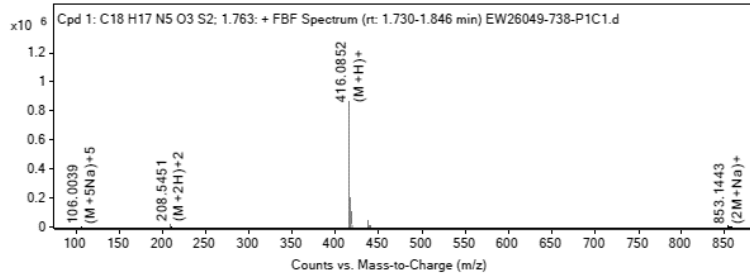

#### MS Spectrum Peak List

| Obs. <i>m/z</i> | Charge | Abund    | Ion/Isotope |
|-----------------|--------|----------|-------------|
| 208.5451        | 2      | 22678.21 | (M+2H)+2    |
| 209.0469        | 2      | 5371.39  | (M+2H)+2    |

|          |   |                   |
|----------|---|-------------------|
| 209.5444 | 2 | 2506.16[(M+2H)+2] |
| 416.0852 | 1 | 863713.56[(M+H)+] |
| 417.0869 | 1 | 200761.59[(M+H)+] |
| 418.0825 | 1 | 99680.85[(M+H)+]  |
| 438.0658 | 1 | 42955.25[(M+Na)+] |
| 439.0681 | 1 | 9944.64[(M+Na)+]  |
| 440.0644 | 1 | 5401.75[(M+Na)+]  |
| 853.1443 | 1 | 4463.23[(2M+Na)+] |

MS Zoomed Spectrum

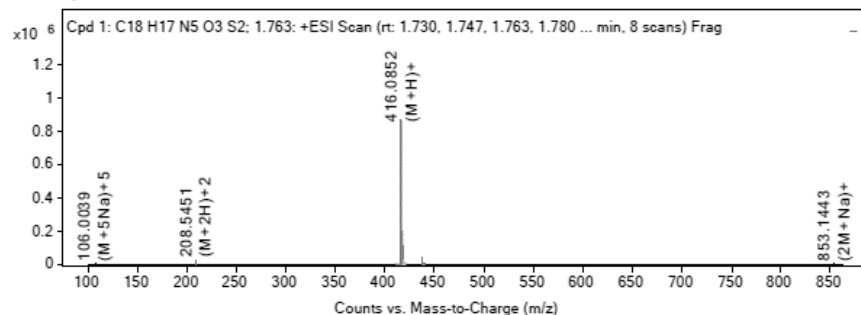

MS Spectrum Peak List

| Obs. m/z | Charge | Abund     | Ion/Isotope | Ygt Mass Error (ppm) |
|----------|--------|-----------|-------------|----------------------|
| 208.5451 | 2      | 22678.21  | [(M+2H)+2]  | 3.85                 |
| 209.0469 | 2      | 5371.39   | [(M+2H)+2]  | 1.74                 |
| 209.5444 | 2      | 2506.16   | [(M+2H)+2]  | 2.86                 |
| 416.0852 | 1      | 863713.56 | [(M+H)+]    | -1.65                |
| 417.0869 | 1      | 200761.59 | [(M+H)+]    | 0.7                  |
| 418.0825 | 1      | 99680.85  | [(M+H)+]    | 0.67                 |
| 438.0658 | 1      | 42955.25  | [(M+Na)+]   | 1.51                 |
| 439.0681 | 1      | 9944.64   | [(M+Na)+]   | 2.21                 |
| 440.0644 | 1      | 5401.75   | [(M+Na)+]   | 0.72                 |
| 853.1443 | 1      | 4463.23   | [(2M+Na)+]  | -0.62                |

--- End Of Report ---

**SFC (2R,3R,4S,5S)-2-(4-Aminopyrrolo[2,3-d]pyrimidin-7-yl)-5-(1,3-benzothiazol-2-ylsulfanylmethyl)tetrahydrofuran-3,4-diol (**27**)**

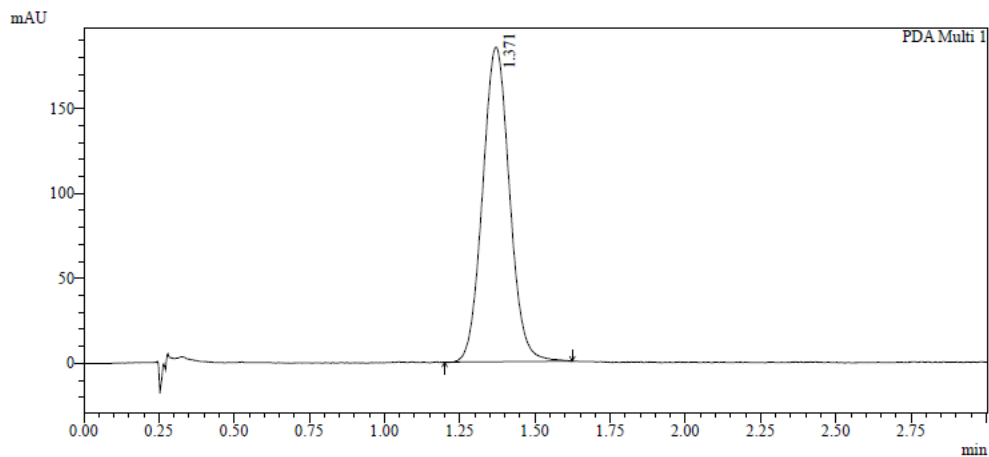

1 PDA Multi 1 / 220nm,4nm

#### Integration Results

| PeakTable     |       |           |           |            |        |         |
|---------------|-------|-----------|-----------|------------|--------|---------|
| PDA Ch1 220nm | Peak# | Ret. Time | USP Width | Resolution | Height | Area    |
|               | 1     | 1.371     | 0.164     | 0.000      | 184561 | 1155126 |
|               | Total |           |           |            | 184561 | 1155126 |
|               |       |           |           |            |        | Area %  |
|               |       |           |           |            |        | 100.000 |
|               |       |           |           |            |        | 100.000 |

**<sup>1</sup>H NMR (2R,3R,4R,5R)-2-((Benzoyloxy)methyl)-5-(4-chloro-5-iodo-7H-pyrrolo[2,3-d]pyrimidin-7-**

yl)tetrahydrofuran-3,4-diyl dibenzoate (**64**)

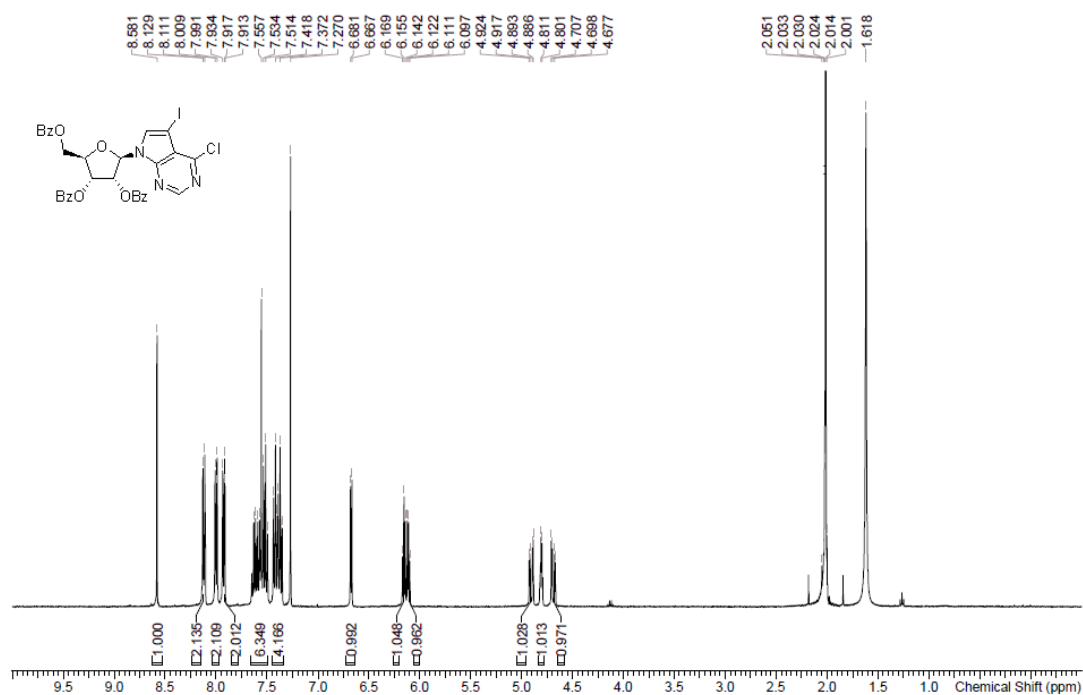

**<sup>1</sup>H NMR** (2R,3R,4S,5R)-2-(4-Amino-5-iodo-7H-pyrrolo[2,3-d]pyrimidin-7-yl)-5-(hydroxymethyl)tetrahydrofuran-3,4-diol (**65**)

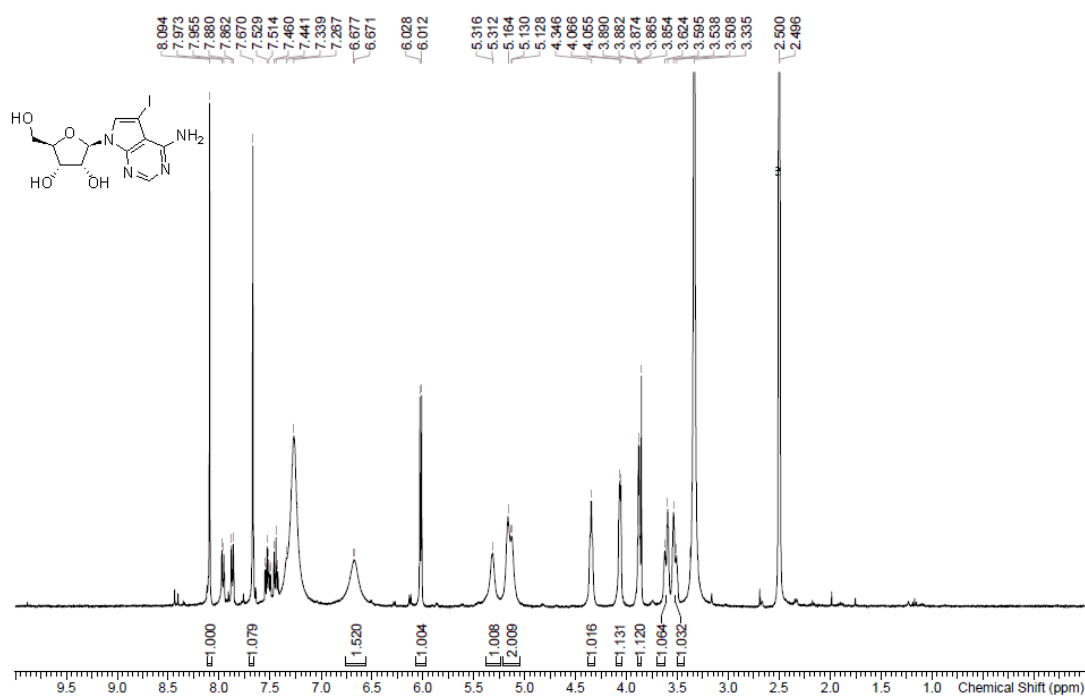

Chemical structure of compound 10 is shown in the top left corner. The structure is a substituted pyrazole with a TBSO group, an NH<sub>2</sub> group, and a TBSO group. The pyrazole ring is substituted with a TBSO group, an NH<sub>2</sub> group, and a TBSO group.

<sup>1</sup>H NMR spectrum (CDCl<sub>3</sub>) of compound 10. The x-axis represents the chemical shift in ppm, ranging from 0 to 10. The spectrum shows several peaks, with the following chemical shifts (ppm) labeled above the peaks: 8.260, 7.535, 7.270, 6.266, 6.252, 5.716, 4.409, 4.387, 4.365, 4.240, 4.232, 4.139, 4.121, 4.084, 4.066, 3.950, 3.792, 3.767, 2.055, 1.717, 1.268, 0.998, 0.937, 0.923, 0.893, 0.879, 0.871, 0.862, 0.779, 0.186, 0.172, 0.105, -0.071, -0.267. Integration values are shown below the baseline: [1.000], [1.001], [0.979], [1.939], [0.944], [1.002], [1.040], [0.994], [1.009], [0.085], [0.900], [0.737], [0.077], [0.456], [2.794], [2.783].

Chromatogram

mAU

0.534 0.615 0.637 0.678 0.787 0.888 0.943 1.012 1.113

PDA Multi 1 220nm, 4nm

0.00 0.25 0.50 0.75 1.00 1.25 1.50 min

1 PDA Multi 1 / 220nm, 4nm  
2 PDA Multi 2 / 254nm, 4nm

MS Chromatogram

349,881  
(-0.058min Delay)

1.113

0.00 0.25 0.50 0.75 1.00 1.25 1.50 min

TIC(+) @ 100,000

Integration Result

| Peak# | Ret. Time | Height  | Height% | USP Width | Area    | Area%  |
|-------|-----------|---------|---------|-----------|---------|--------|
| 1     | 0.534     | 20708   | 1.089   | 0.038     | 29401   | 0.558  |
| 2     | 0.615     | 6303    | 0.332   | 0.043     | 7490    | 0.142  |
| 3     | 0.637     | 5420    | 0.285   | 0.044     | 5545    | 0.105  |
| 4     | 0.678     | 6402    | 0.337   | 0.043     | 10172   | 0.193  |
| 5     | 0.787     | 10380   | 0.546   | 0.048     | 20047   | 0.380  |
| 6     | 0.888     | 9099    | 0.479   | 0.038     | 13361   | 0.253  |
| 7     | 0.943     | 6160    | 0.324   | 0.037     | 7887    | 0.150  |
| 8     | 1.012     | 3665    | 0.193   | 0.056     | 5244    | 0.099  |
| 9     | 1.113     | 9734    | 0.512   | 0.086     | 24637   | 0.467  |
| 10    | 1.205     | 1823506 | 95.905  | 0.072     | 5149420 | 97.653 |

Peak Table



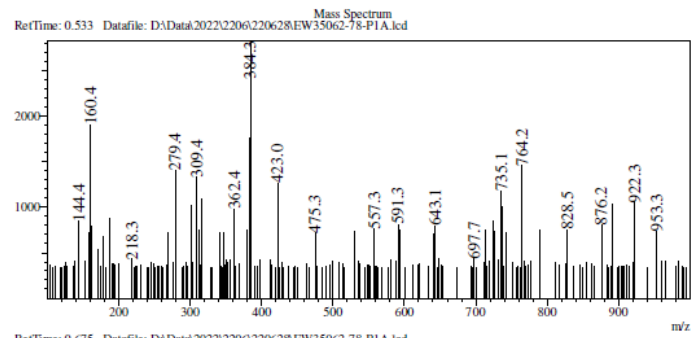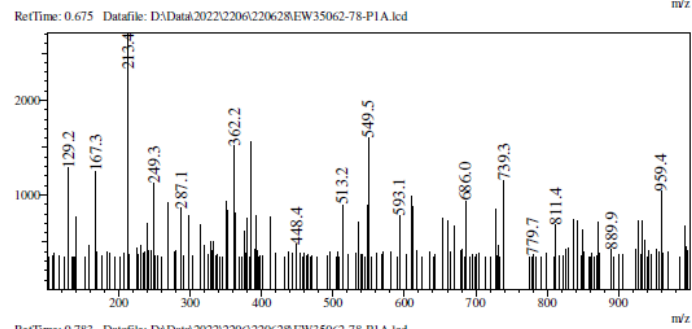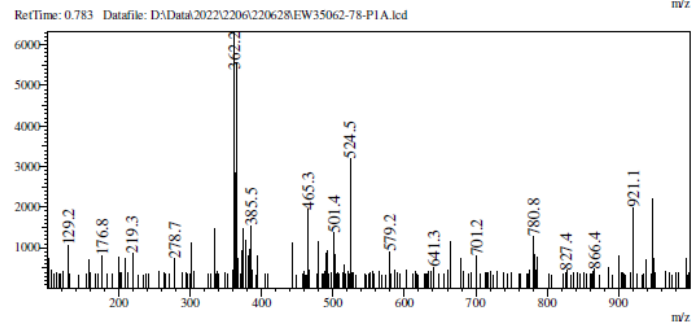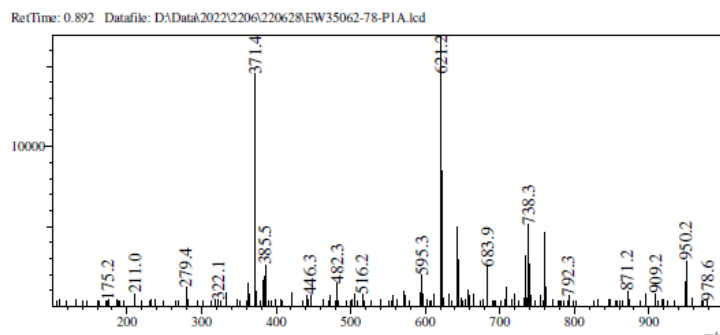

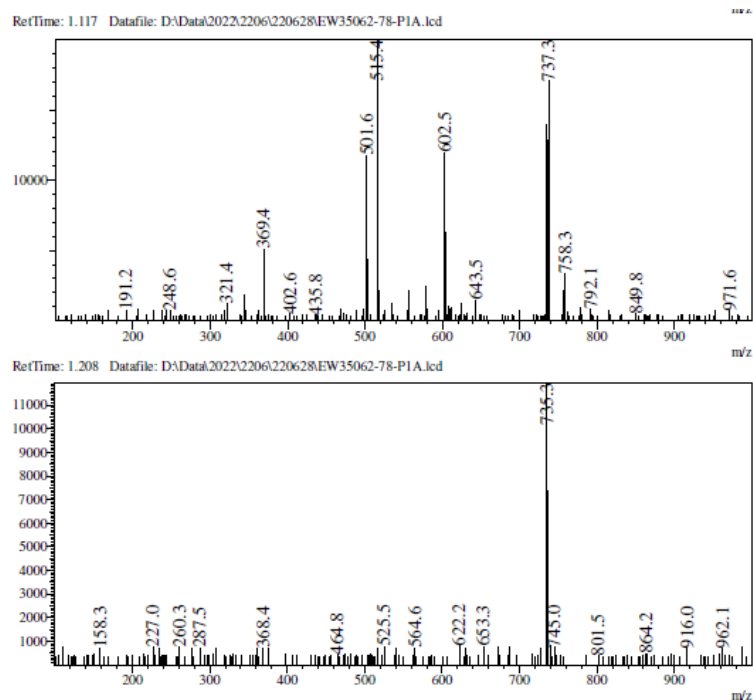

**$^1\text{H}$  NMR** ((2R,3R,4R,5R)-5-(4-amino-5-iodo-7H-pyrrolo[2,3-d]pyrimidin-7-yl)-3,4-bis((tert-butyl)dimethylsilyl)oxy)tetrahydrofuran-2-yl)methanol (**67**)

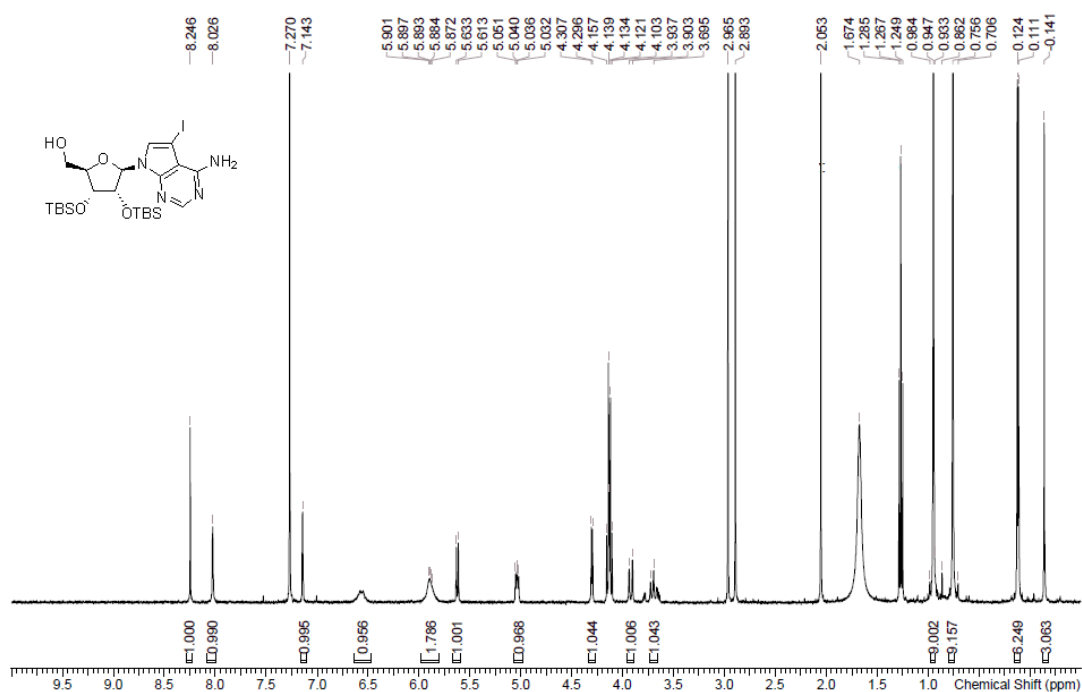

**LCMS** ((2R,3R,4R,5R)-5-(4-amino-5-iodo-7H-pyrrolo[2,3-d]pyrimidin-7-yl)-3,4-bis((tert-butyl)dimethylsilyl)oxy)tetrahydrofuran-2-yl)methanol (**67**)

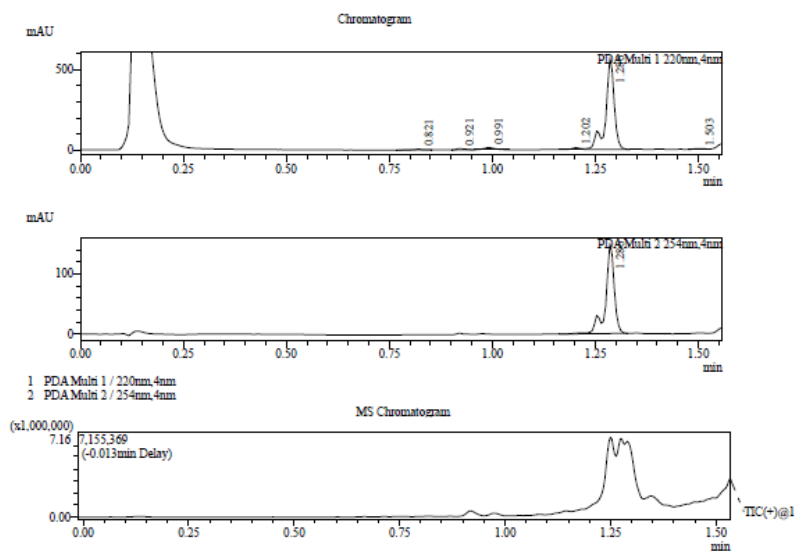

| Integration Result |           |        |         |           |        |         |
|--------------------|-----------|--------|---------|-----------|--------|---------|
| Peak Table         |           |        |         |           |        |         |
| PDA Ch1 220nm      |           |        |         |           |        |         |
| Peak#              | Ret. Time | Height | Height% | USP Width | Area   | Area%   |
| 1                  | 0.821     | 5537   | 0.902   | 0.027     | 5970   | 0.672   |
| 2                  | 0.921     | 7829   | 1.276   | 0.036     | 10278  | 1.157   |
| 3                  | 0.991     | 13491  | 2.198   | 0.057     | 23874  | 2.687   |
| 4                  | 1.202     | 10525  | 1.715   | 0.048     | 16023  | 1.803   |
| 5                  | 1.286     | 573201 | 93.395  | 0.037     | 827403 | 93.115  |
| 6                  | 1.503     | 3154   | 0.514   | 0.043     | 5034   | 0.566   |
| Peak Table         |           |        |         |           |        |         |
| PDA Ch2 254nm      |           |        |         |           |        |         |
| Peak#              | Ret. Time | Height | Height% | USP Width | Area   | Area%   |
| 1                  | 1.286     | 150263 | 100.000 | 0.037     | 219703 | 100.000 |

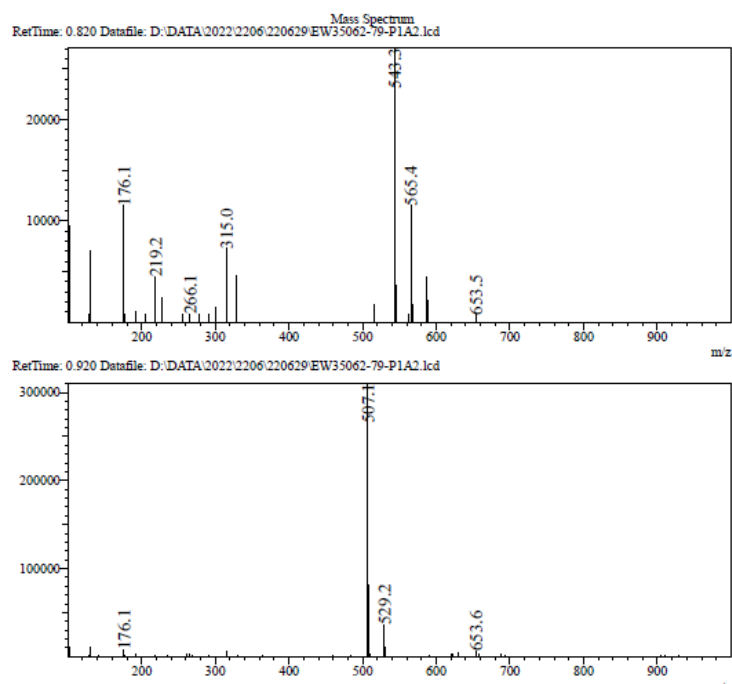

RefTime: 0.990 Datafile: D:\DATA\2022\2206\220629\EW35062-79-P1A2.lcd

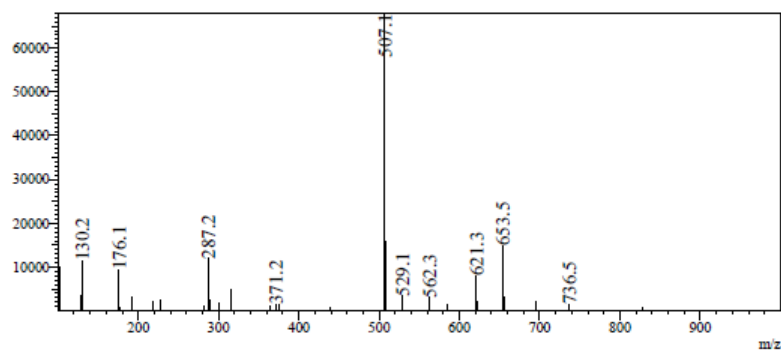

RefTime: 1.203 Datafile: D:\DATA\2022\2206\220629\EW35062-79-P1A2.lcd

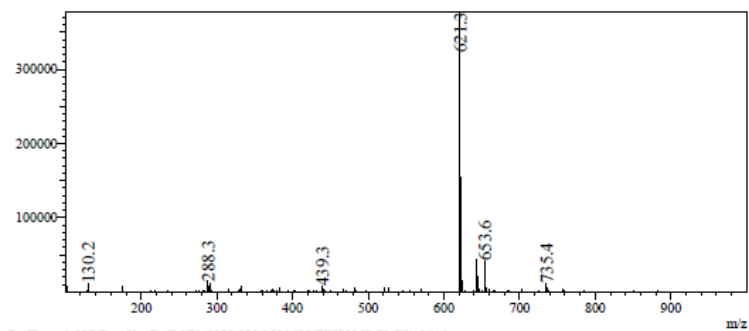

RefTime: 1.287 Datafile: D:\DATA\2022\2206\220629\EW35062-79-P1A2.lcd

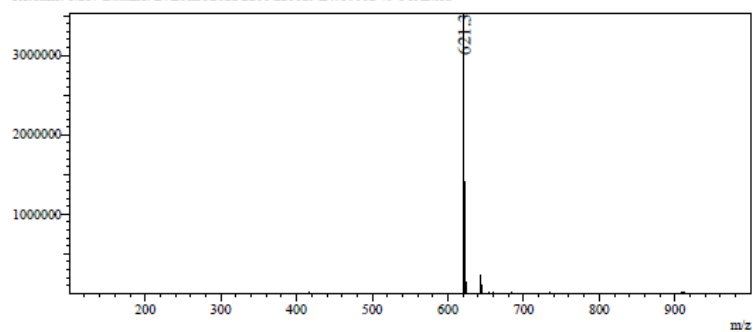

RefTime: 1.503 Datafile: D:\DATA\2022\2206\220629\EW35062-79-P1A2.lcd

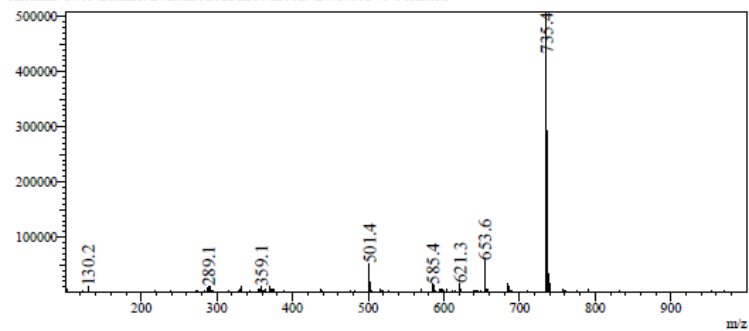

**<sup>1</sup>H NMR** ((2R,3R,4R,5R)-5-(4-Amino-5-iodo-7H-pyrrolo[2,3-d]pyrimidin-7-yl)-3,4-bis((tert-butyl)dimethylsilyl)oxy)tetrahydrofuran-2-yl)methyl methanesulfonate (**68**)

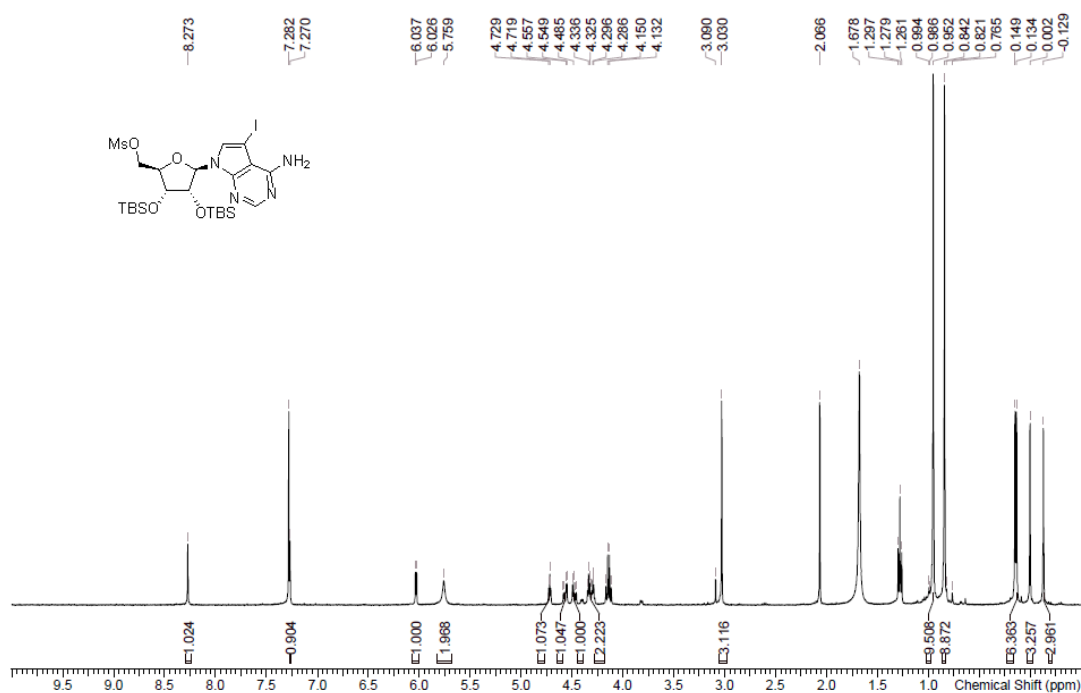

**LCMS** ((2R,3R,4R,5R)-5-(4-Amino-5-iodo-7H-pyrrolo[2,3-d]pyrimidin-7-yl)-3,4-bis((tert-butyl)dimethylsilyl)oxy)tetrahydrofuran-2-yl)methyl methanesulfonate (**68**)

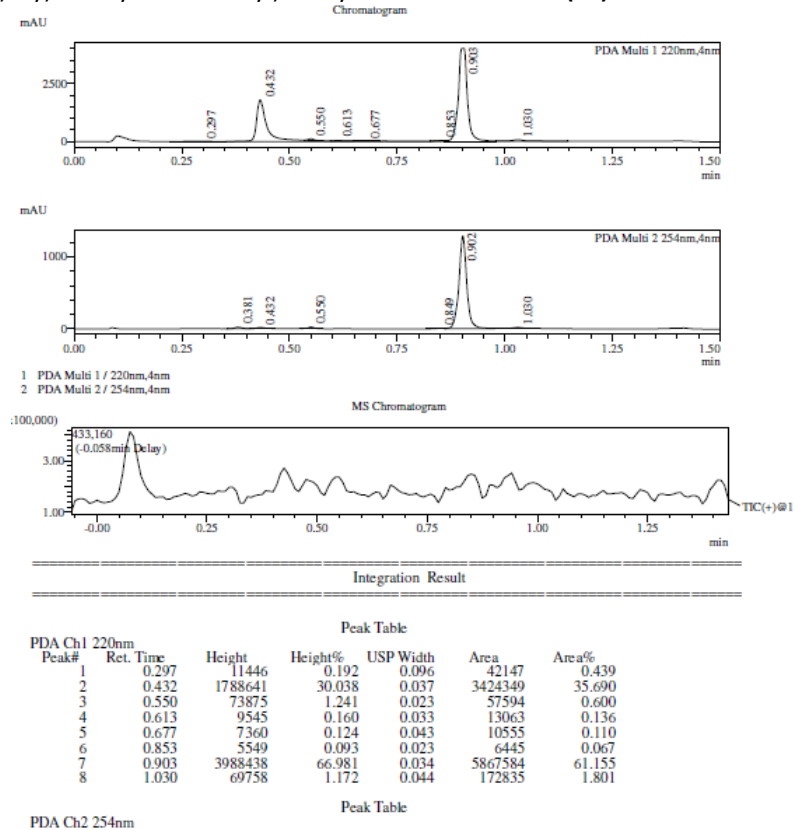

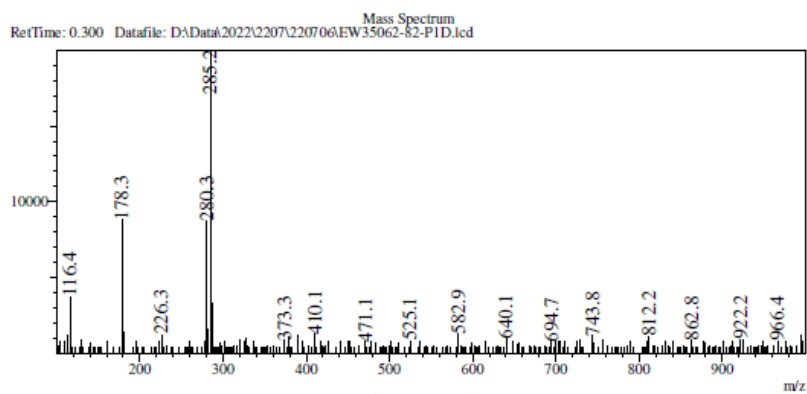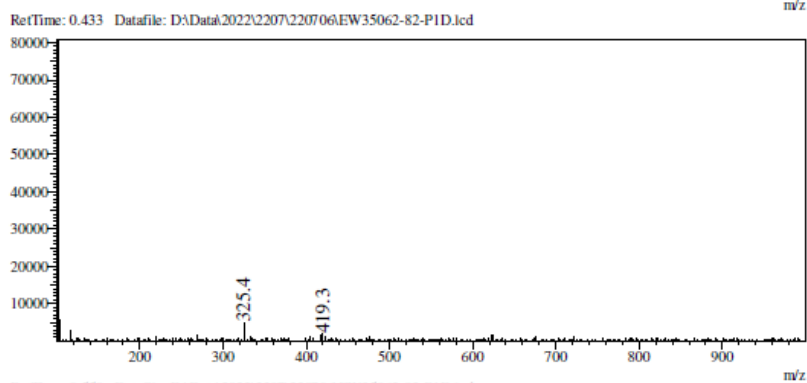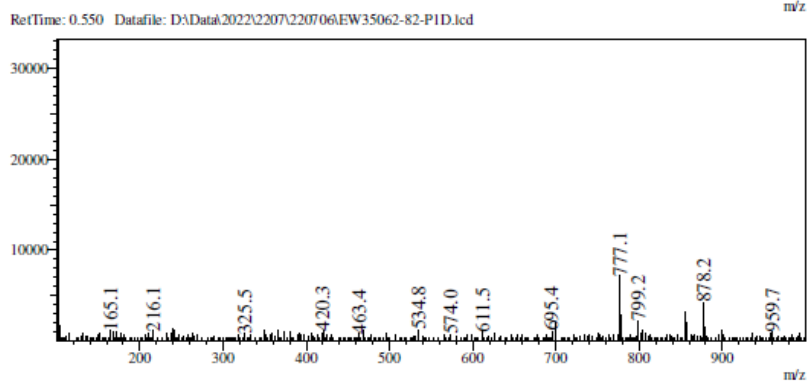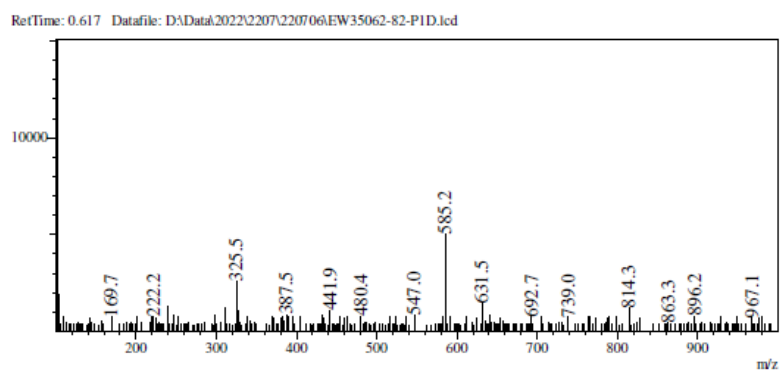

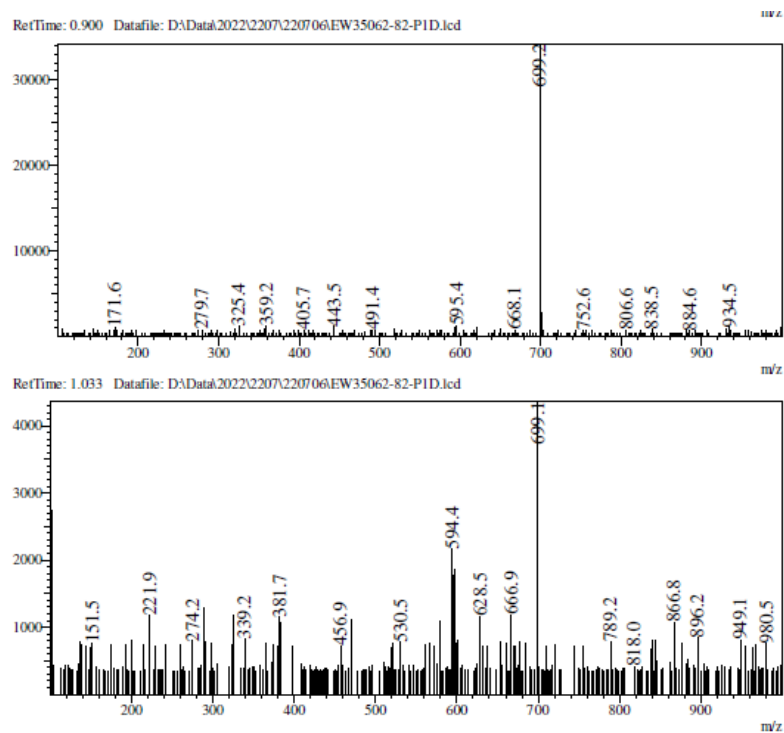

$^1\text{H}$  NMR 7-((2R,3R,4R,5S)-5-((Benzo[d]thiazol-2-ylthio)methyl)-3,4-bis((tert-butylidimethylsilyl)oxy)tetrahydrofuran-2-yl)-5-iodo-7H-pyrrolo[2,3-d]pyrimidin-4-amine (**69**)

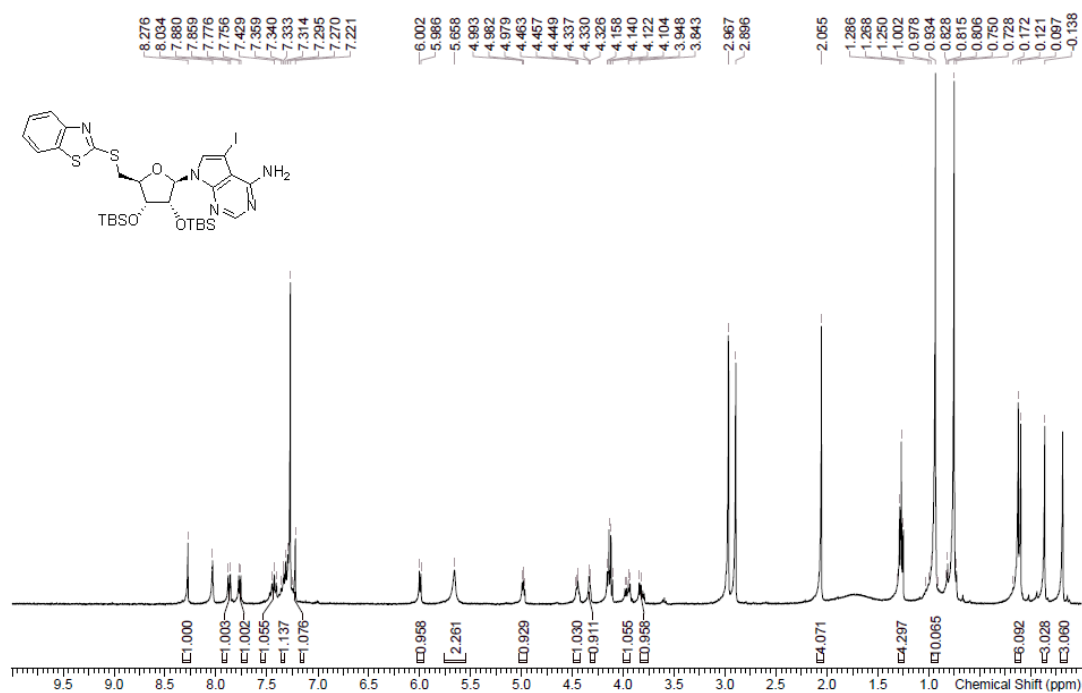

**LCMS 7-((2R,3R,4R,5S)-5-((Benzo[d]thiazol-2-ylthio)methyl)-3,4-bis((tert-butyl)dimethylsilyl)oxy)tetrahydrofuran-2-yl)-5-iodo-7H-pyrrolo[2,3-d]pyrimidin-4-amine (69)**

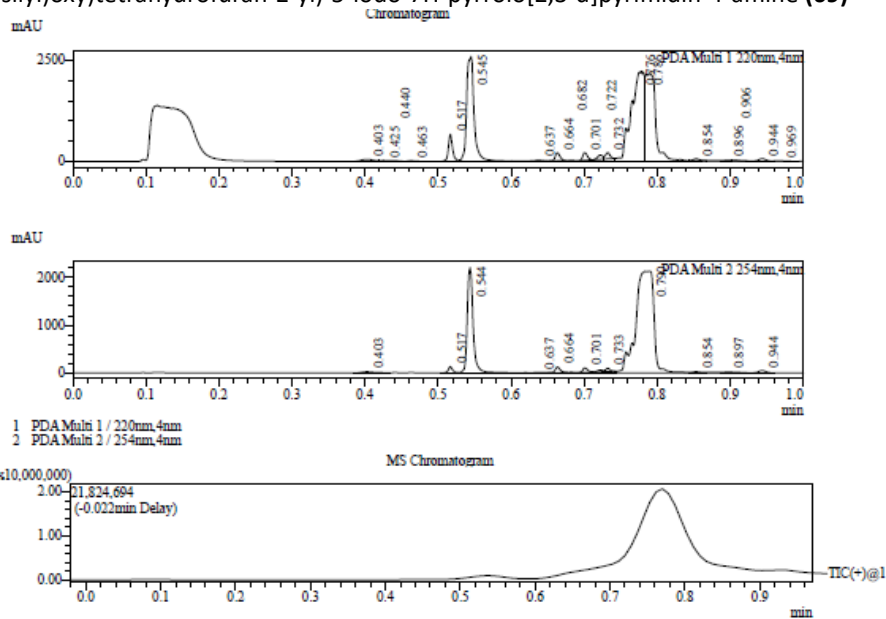

| Integration Result |           |         |         |           |         |        |
|--------------------|-----------|---------|---------|-----------|---------|--------|
| Peak Table         |           |         |         |           |         |        |
| Peak#              | Ret. Time | Height  | Height% | USP Width | Area    | Area%  |
| 1                  | 0.403     | 49851   | 0.580   | 0.033     | 57767   | 0.749  |
| 2                  | 0.425     | 21355   | 0.249   | 0.070     | 18263   | 0.237  |
| 3                  | 0.440     | 19696   | 0.229   | 0.034     | 11777   | 0.153  |
| 4                  | 0.463     | 16567   | 0.193   | 0.016     | 8902    | 0.115  |
| 5                  | 0.517     | 669022  | 7.790   | 0.011     | 271116  | 3.517  |
| 6                  | 0.545     | 2594224 | 30.206  | 0.018     | 2024636 | 26.266 |
| 7                  | 0.637     | 23526   | 0.274   | 0.017     | 13073   | 0.170  |
| 8                  | 0.664     | 203254  | 2.367   | 0.014     | 95825   | 1.243  |
| 9                  | 0.682     | 17152   | 0.200   | 0.014     | 8167    | 0.106  |
| 10                 | 0.701     | 193689  | 2.255   | 0.014     | 85915   | 1.115  |
| 11                 | 0.722     | 105327  | 1.226   | 0.019     | 52300   | 0.679  |
| 12                 | 0.732     | 157534  | 1.834   | 0.014     | 68516   | 0.889  |
| 13                 | 0.776     | 2205382 | 25.678  | 0.078     | 2892441 | 37.525 |
| 14                 | 0.786     | 2145964 | 24.986  | 0.063     | 1995864 | 25.893 |

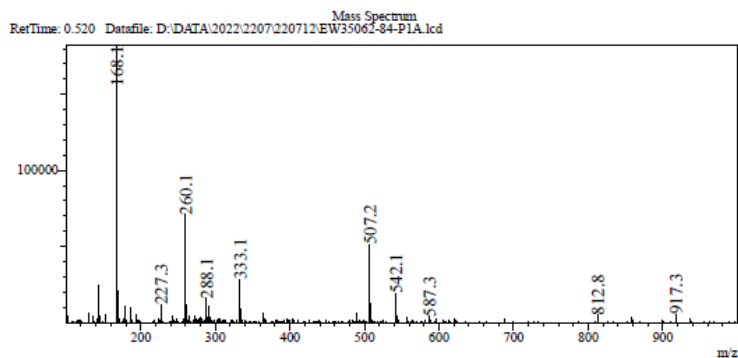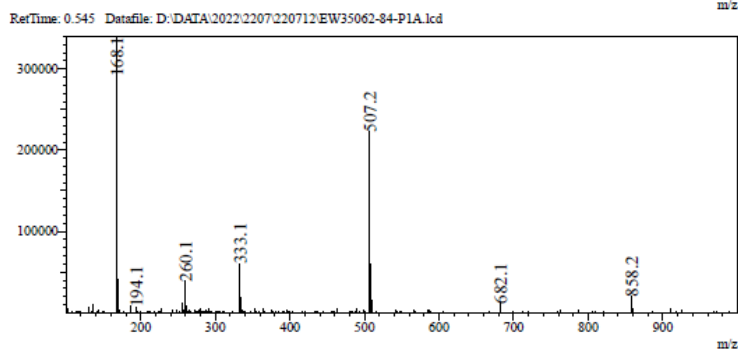



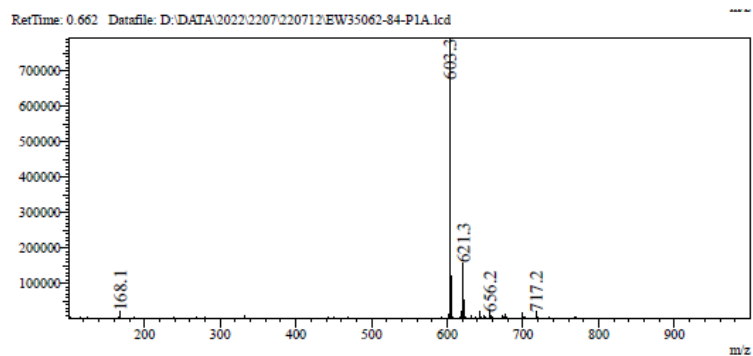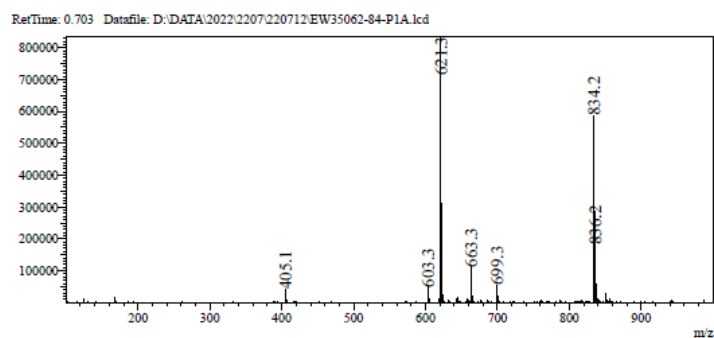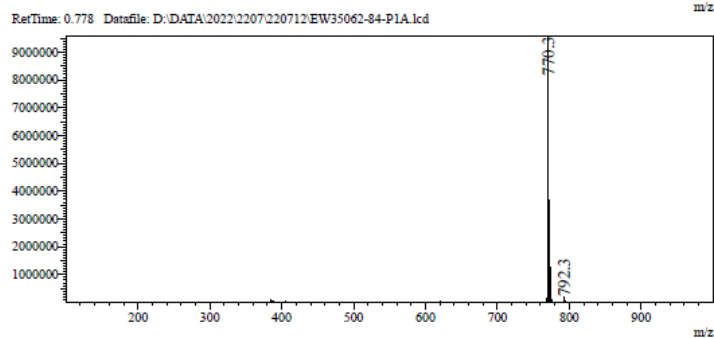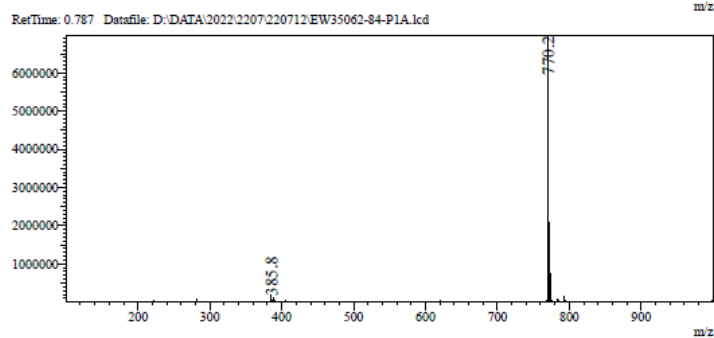

**<sup>1</sup>H NMR** 4-Amino-7-[(2*R*,3*R*,4*R*,5*S*)-5-(1,3-benzothiazol-2-ylsulfanylmethyl)- 3,4-bis[[tert-butyl(dimethyl)silyl]oxy]tetrahydrofuran-2-yl]pyrrolo[2,3-*d*]pyrimidine-5-carbonitrile (**70**)

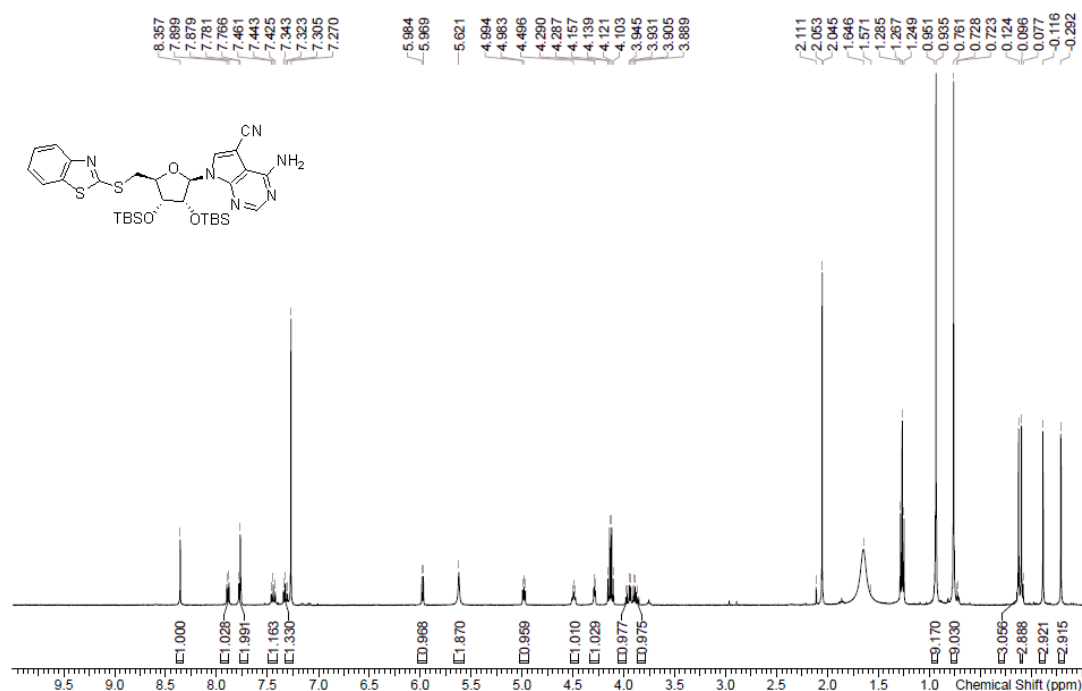

**LCMS** 4-Amino-7-[(2*R*,3*R*,4*R*,5*S*)-5-(1,3-benzothiazol-2-ylsulfanylmethyl)- 3,4-bis[[tert-butyl(dimethyl)silyl]oxy]tetrahydrofuran-2-yl]pyrrolo[2,3-*d*]pyrimidine-5-carbonitrile (**70**)

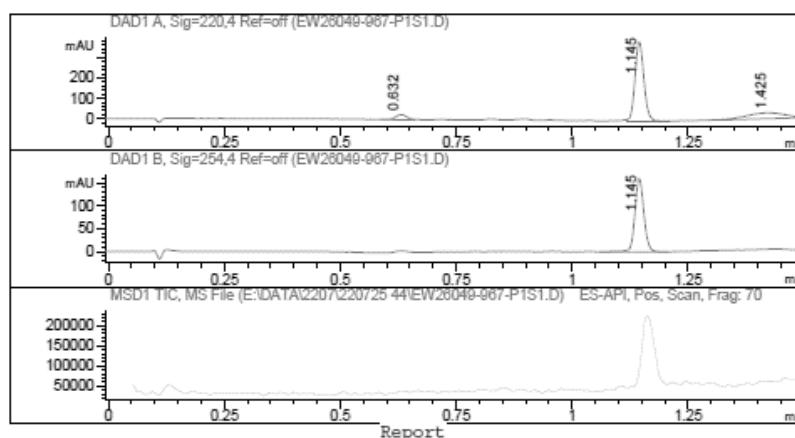

| Signal 1 : DAD1 A, Sig=220,4 Ref=off |       |         |        |         |        |
|--------------------------------------|-------|---------|--------|---------|--------|
| #                                    | Meas. | Ret.    | Height | Width   | Area   |
| 1                                    | 0.632 | 23.478  | 0.028  | 40.938  | 5.684  |
| 2                                    | 1.145 | 388.943 | 0.021  | 520.252 | 72.234 |
| 3                                    | 1.425 | 28.175  | 0.068  | 159.042 | 22.082 |

  

| Signal 2 : DAD1 B, Sig=254,4 Ref=off |       |         |        |         |         |
|--------------------------------------|-------|---------|--------|---------|---------|
| #                                    | Meas. | Ret.    | Height | Width   | Area    |
| 1                                    | 1.145 | 160.041 | 0.021  | 216.532 | 100.000 |

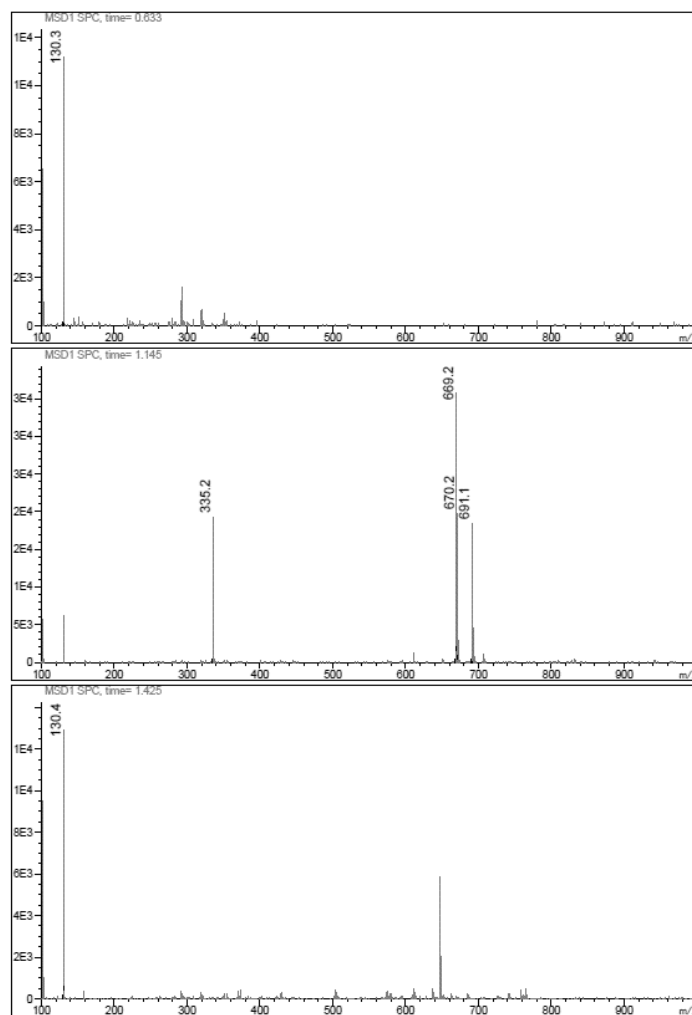

**<sup>1</sup>H NMR** 4-Amino-7-[(2*R*,3*R*,4*S*,5*S*)-5-(1,3-benzothiazol-2-ylsulfanylmethyl)-3,4-dihydroxy-tetrahydrofuran-2-yl]pyrrolo[2,3-*d*]pyrimidine-5-carbonitrile (**29**)

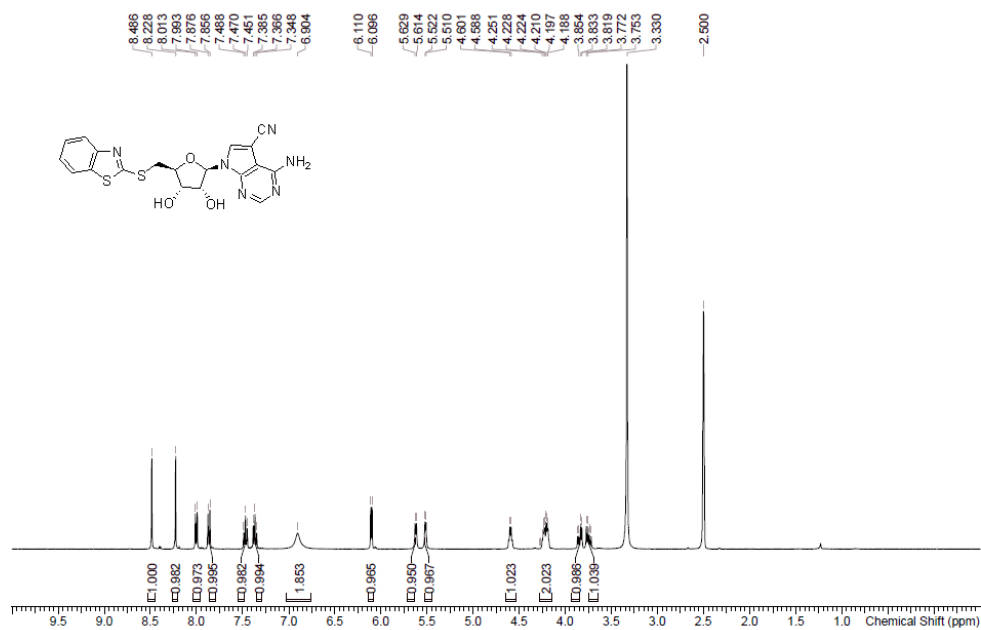

**HPLC** 4-Amino-7-[(2*R*,3*R*,4*S*,5*S*)-5-(1,3-benzothiazol-2-ylsulfanylmethyl)-3,4-dihydroxy-tetrahydrofuran-2-yl]pyrrolo[2,3-*d*]pyrimidine-5-carbonitrile (**29**)

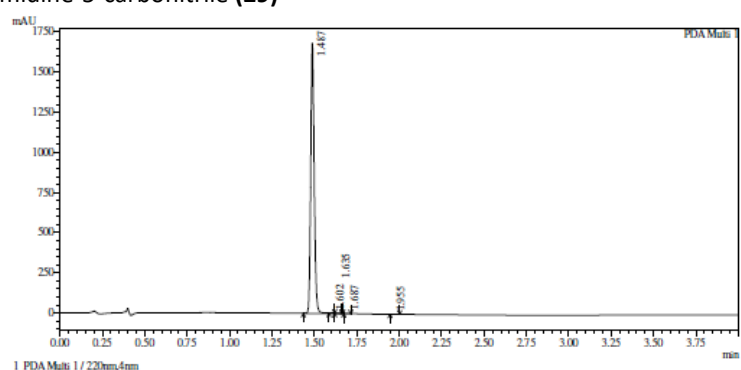

Integration result

| PeakTable |           |           |            |         |         |         |
|-----------|-----------|-----------|------------|---------|---------|---------|
| Peak#     | Ret. Time | USP Width | Resolution | Height  | Area    | Area %  |
| 1         | 1.487     | 0.039     | 0.000      | 1684535 | 2406612 | 99.765  |
| 2         | 1.602     | 0.037     | 3.048      | 1499    | 1836    | 0.076   |
| 3         | 1.635     | 0.048     | 0.769      | 1227    | 1595    | 0.066   |
| 4         | 1.687     | 0.035     | 1.261      | 940     | 1093    | 0.045   |
| 5         | 1.955     | 0.051     | 6.204      | 612     | 1145    | 0.047   |
| Total     |           |           |            | 1688813 | 2412282 | 100.000 |

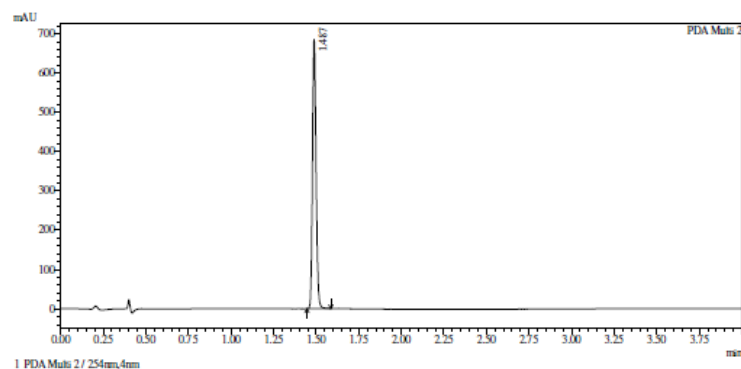

Integration result

| PeakTable |           |           |            |        |         |         |
|-----------|-----------|-----------|------------|--------|---------|---------|
| Peak#     | Ret. Time | USP Width | Resolution | Height | Area    | Area %  |
| 1         | 1.487     | 0.040     | 0.000      | 685292 | 1006213 | 100.000 |
| Total     |           |           |            | 685292 | 1006213 | 100.000 |

**HRMC** 4-Amino-7-[(2*R*,3*R*,4*S*,5*S*)-5-(1,3-benzothiazol-2-ylsulfanylmethyl)-3,4-dihydroxy-tetrahydrofuran-2-yl]pyrrolo[2,3-*d*]pyrimidine-5-carbonitrile (**29**)

| Label                          | Tgt Score | Mass Error (ppm) | Tgt Formula      | Obs. RT | Ref. Mass | Obs. Mass |
|--------------------------------|-----------|------------------|------------------|---------|-----------|-----------|
| Cpd 1: C19 H16 N6 O3 S2: 1.929 | 97.19     | 3.08             | C19 H16 N6 O3 S2 | 1.929   | 440.0725  | 440.0739  |

| Obs. m/z | Obs. RT | Obs. Mass | Tgt Formula      | Tgt Mass | Tgt Mass Error (ppm) | Find Cpts Algorithm |
|----------|---------|-----------|------------------|----------|----------------------|---------------------|
| 463.0625 | 1.929   | 440.0739  | C19 H16 N6 O3 S2 | 440.0725 | 3.08                 | Find by Formula     |

Compound Chromatograms

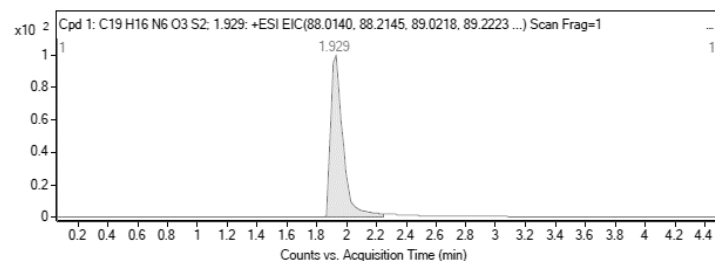

MS Zoomed Spectrum

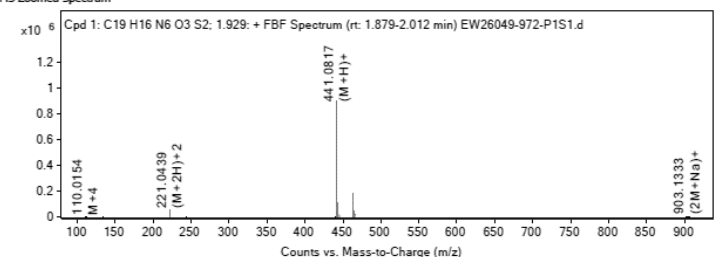

MS Spectrum Peak List

| Obs. m/z | Charge | Abund    | Ion/Isotope |
|----------|--------|----------|-------------|
| 221.0439 | 2      | 48245.51 | (M+2H)+2    |
| 221.5454 | 2      | 11702.35 | (M+2H)+2    |

|          |   |           |          |
|----------|---|-----------|----------|
| 222.0354 | 2 | 6460.34   | (M+2H)+2 |
| 440.0802 | 1 | 3350.33   | M+       |
| 441.0817 | 1 | 904731.38 | (M+H)+   |
| 442.0832 | 1 | 224744.67 | (M+H)+   |
| 443.079  | 1 | 107433.2  | (M+H)+   |
| 463.0625 | 1 | 183445.64 | (M+Na)+  |
| 464.0646 | 1 | 43487.23  | (M+Na)+  |
| 465.0608 | 1 | 21211.3   | (M+Na)+  |

MS Zoomed Spectrum

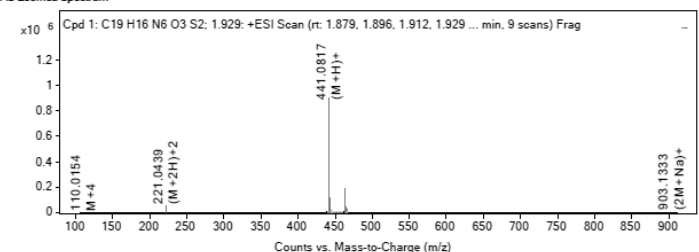

MS Spectrum Peak List

| Obs. m/z | Charge | Abund     | Ion/Isotope | Tgt Mass Error (ppm) |
|----------|--------|-----------|-------------|----------------------|
| 221.0439 | 2      | 48245.51  | (M+2H)+2    | -1.54                |
| 221.5454 | 2      | 11702.35  | (M+2H)+2    | -2.74                |
| 222.0354 | 2      | 6460.34   | (M+2H)+2    | -42.25               |
| 440.0802 | 1      | 3350.33   | M+          | -18.6                |
| 441.0817 | 1      | 904731.38 | (M+H)+      | -4.36                |
| 442.0832 | 1      | 224744.67 | (M+H)+      | -1.98                |
| 443.079  | 1      | 107433.2  | (M+H)+      | -1.61                |
| 463.0625 | 1      | 183445.64 | (M+Na)+     | -1.6                 |
| 464.0646 | 1      | 43487.23  | (M+Na)+     | -0.6                 |
| 465.0608 | 1      | 21211.3   | (M+Na)+     | -1.35                |

— End Of Report —

**<sup>1</sup>H NMR 7-[(2*R*,3*R*,4*R*,5*S*)-5-(1,3-benzothiazol-2-ylsulfanylmethyl)-3,4-bis [[tert-butyl(dimethyl)silyl]oxy]tetrahydrofuran-2-yl]-5-(2-trimethylsilylethynyl)pyrrolo[2,3-*d*]pyrimidin-4-amine (71)**

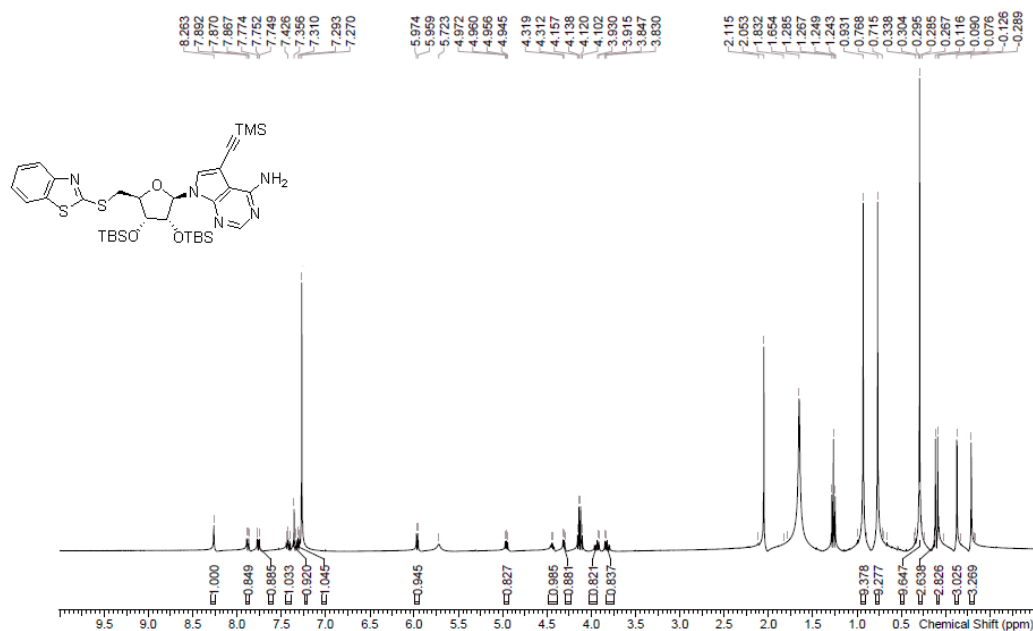

**<sup>1</sup>H NMR (2*R*,3*R*,4*S*,5*S*)-2-(4-Amino-5-ethynyl-pyrrolo[2,3-*d*]pyrimidin-7-yl) -5-(1,3-benzothiazol-2-ylsulfanylmethyl)tetrahydrofuran-3,4-diol (30)**

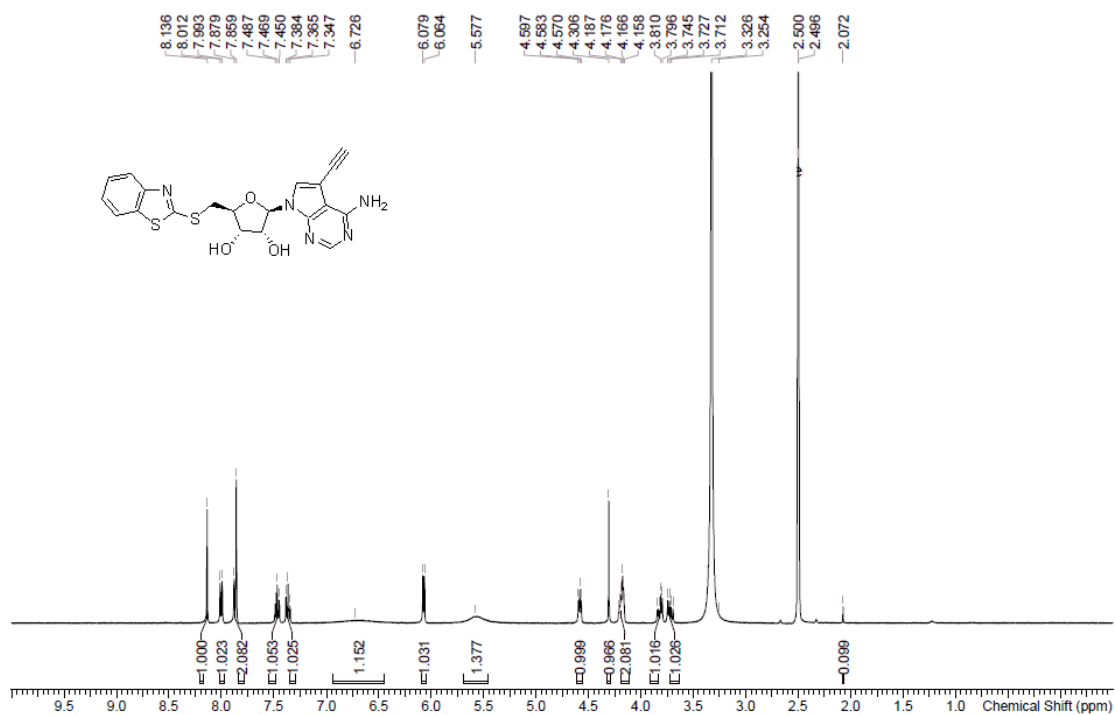

**HPLC (2*R*,3*R*,4*S*,5*S*)-2-(4-Amino-5-ethynyl-pyrrolo[2,3-*d*]pyrimidin-7-yl) -5-(1,3-benzothiazol-2-ylsulfanylmethyl)tetrahydrofuran-3,4-diol (**30**)**

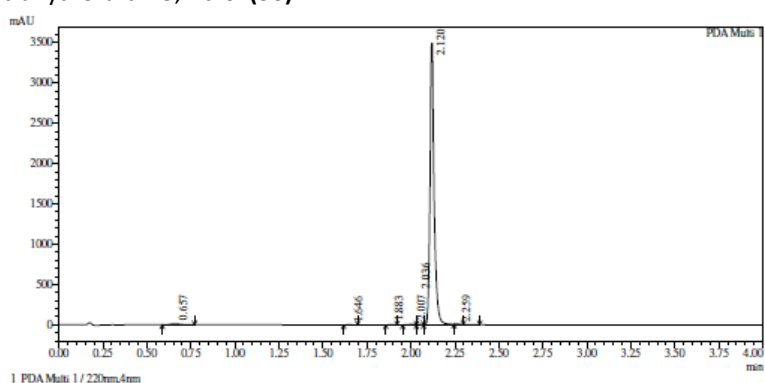

Integration result

| PeakTable |           |           |            |         |         |         |
|-----------|-----------|-----------|------------|---------|---------|---------|
| Peak#     | Ret. Time | USP Width | Resolution | Height  | Area    | Area %  |
| 1         | 0.657     | 0.109     | 0.000      | 12357   | 51635   | 0.883   |
| 2         | 1.646     | 0.054     | 12.138     | 1711    | 3279    | 0.056   |
| 3         | 1.883     | 0.047     | 4.719      | 1622    | 2724    | 0.047   |
| 4         | 2.007     | 0.081     | 1.947      | 8785    | 19846   | 0.339   |
| 5         | 2.036     | 1.134     | 0.047      | 6184    | 11813   | 0.202   |
| 6         | 2.120     | 0.038     | 0.143      | 3494132 | 5758487 | 98.421  |
| 7         | 2.259     | 0.044     | 3.413      | 1880    | 3102    | 0.053   |
| Total     |           |           |            | 3526670 | 5850885 | 100.000 |

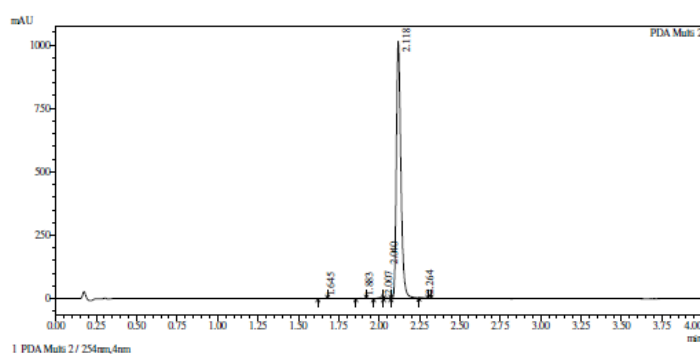

Integration result

| PeakTable |           |           |            |         |         |         |
|-----------|-----------|-----------|------------|---------|---------|---------|
| Peak#     | Ret. Time | USP Width | Resolution | Height  | Area    | Area %  |
| 1         | 1.645     | 0.049     | 0.000      | 643     | 1086    | 0.054   |
| 2         | 1.883     | 0.049     | 4.864      | 1097    | 1890    | 0.094   |
| 3         | 2.007     | 0.076     | 1.975      | 3675    | 7550    | 0.377   |
| 4         | 2.040     | 0.300     | 0.178      | 2657    | 5476    | 0.273   |
| 5         | 2.118     | 0.051     | 0.444      | 1013408 | 1985331 | 99.146  |
| 6         | 2.264     | 0.043     | 3.111      | 760     | 1091    | 0.054   |
| Total     |           |           |            | 1022240 | 2002424 | 100.000 |

**HRMS** (2*R*,3*R*,4*S*,5*S*)-2-(4-Amino-5-ethynyl-pyrrolo[2,3-*d*]pyrimidin-7-yl)-5-(1,3-benzothiazol-2-ylsulfanylmethyl)tetrahydrofuran-3,4-diol (**30**)

| Compound Table                 |           |                  |                  |         |           |           |
|--------------------------------|-----------|------------------|------------------|---------|-----------|-----------|
| Label                          | Tgt Score | Mass Error (ppm) | Tgt Formula      | Obs. RT | Ref. Mass | Obs. Mass |
| Cpd 1: C20 H17 N5 O3 S2: 1.922 | 97.93     | 3.61             | C20 H17 N5 O3 S2 | 1.922   | 439.0773  | 439.0789  |

| Obs. m/z | Obs. RT | Obs. Mass | Tgt Formula      | Tgt Mass | Tgt Mass Error (ppm) | Find Cpd's Algorithm |
|----------|---------|-----------|------------------|----------|----------------------|----------------------|
| 462.0668 | 1.922   | 439.0789  | C20 H17 N5 O3 S2 | 439.0773 | 3.61                 | Find by Formula      |

Compound Chromatograms

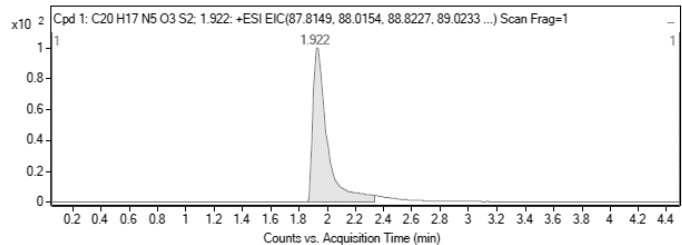

MS Zoomed Spectrum

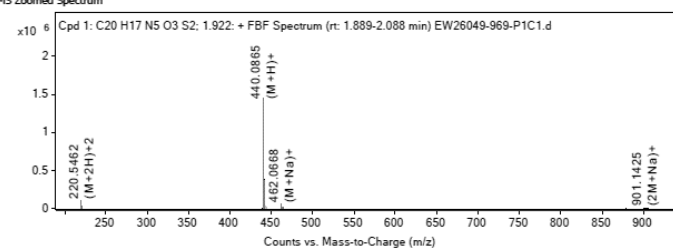

MS Spectrum Peak List

| Obs. m/z | Charge | Abund    | Ion/Isotope |
|----------|--------|----------|-------------|
| 220.5462 | 2      | 96236.7  | (M+2H)+2    |
| 221.0477 | 2      | 24290.77 | (M+2H)+2    |

|          |   |            |          |
|----------|---|------------|----------|
| 221.5456 | 2 | 12155.86   | (M+2H)+2 |
| 440.0865 | 1 | 1453698.13 | (M+H)+   |
| 441.0885 | 1 | 38387.03   | (M+H)+   |
| 442.0892 | 1 | 18049.28   | (M+H)+   |
| 462.0668 | 1 | 58040.09   | (M+Na)+  |
| 463.0695 | 1 | 14781.84   | (M+Na)+  |
| 464.0656 | 1 | 7045.21    | (M+Na)+  |
| 901.1425 | 1 | 4713.46    | (2M+Na)+ |

MS Zoomed Spectrum

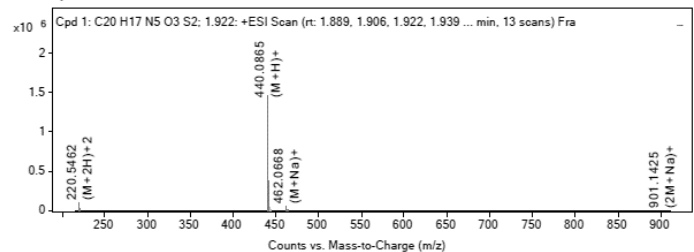

MS Spectrum Peak List

| Obs. m/z | Charge | Abund      | Ion/Isotope | Tgt Mass Error (ppm) |
|----------|--------|------------|-------------|----------------------|
| 220.5462 | 2      | 96236.7    | (M+2H)+2    | -1.42                |
| 221.0477 | 2      | 24290.77   | (M+2H)+2    | -2.17                |
| 221.5456 | 2      | 12155.86   | (M+2H)+2    | -2.08                |
| 440.0865 | 1      | 1453698.13 | (M+H)+      | -4.39                |
| 441.0885 | 1      | 38387.03   | (M+H)+      | -2.88                |
| 442.0892 | 1      | 18049.28   | (M+H)+      | -2.43                |
| 462.0668 | 1      | 58040.09   | (M+Na)+     | -0.64                |
| 463.0695 | 1      | 14781.84   | (M+Na)+     | -0.59                |
| 464.0656 | 1      | 7045.21    | (M+Na)+     | -1.3                 |
| 901.1425 | 1      | 4713.46    | (2M+Na)+    | 1.38                 |

--- End Of Report ---



**<sup>1</sup>H NMR** (2*R*,3*R*,4*S*,5*S*)-2-(4-amino-5-ethyl-pyrrolo[2,3-*d*]pyrimidin-7-yl) -5-(1,3-benzothiazol-2-ylsulfanylmethyl)tetrahydrofuran-3,4-diol (**31**)

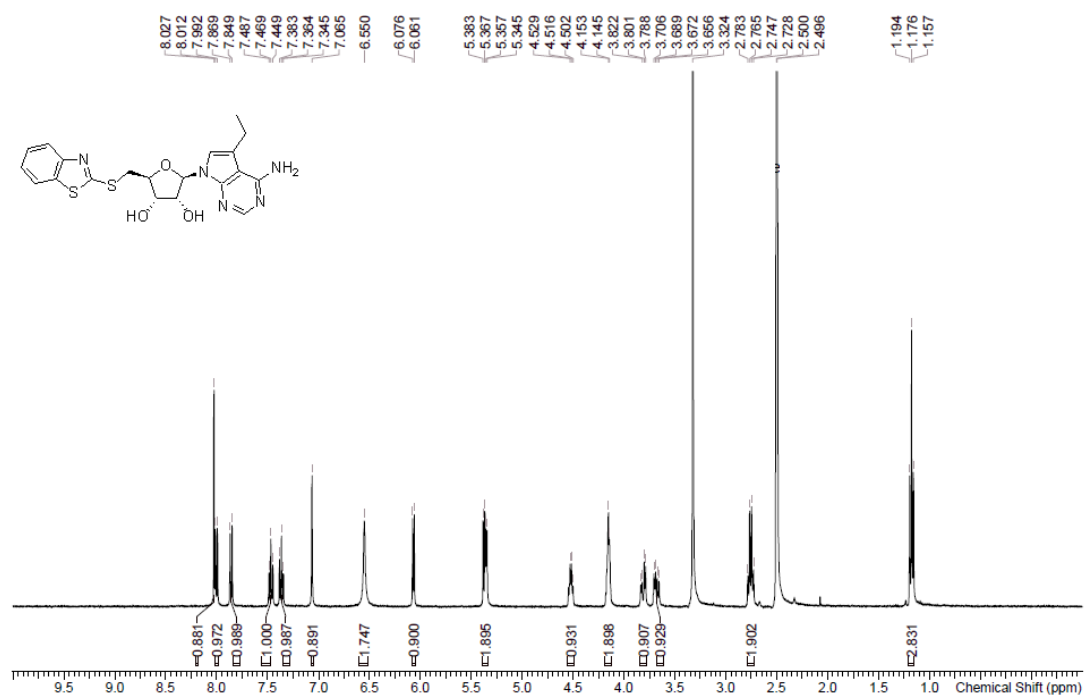

**HPLC** (2*R*,3*R*,4*S*,5*S*)-2-(4-amino-5-ethyl-pyrrolo[2,3-*d*]pyrimidin-7-yl) -5-(1,3-benzothiazol-2-ylsulfanylmethyl)tetrahydrofuran-3,4-diol (**31**)

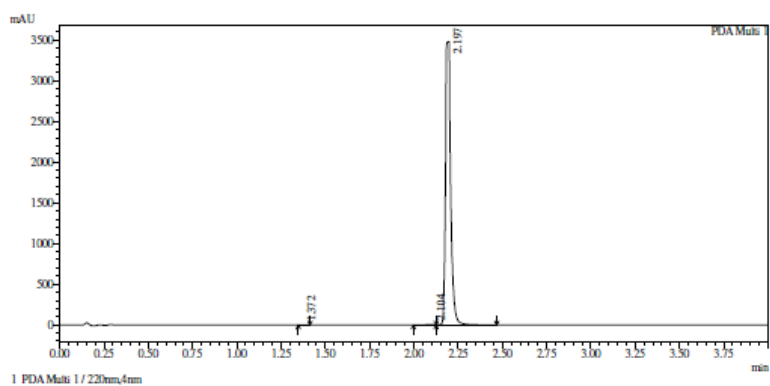

Integration result

| PeakTable |           |           |            |         |         |         |
|-----------|-----------|-----------|------------|---------|---------|---------|
| Peak#     | Ret. Time | USP Width | Resolution | Height  | Area    | Area %  |
| 1         | 1.372     | 0.047     | 0.000      | 913     | 1624    | 0.022   |
| 2         | 2.104     | 0.179     | 6.491      | 4171    | 20937   | 0.288   |
| 3         | 2.197     | 0.043     | 0.837      | 3484429 | 7239225 | 99.689  |
| Total     |           |           |            | 3489513 | 7261786 | 100.000 |

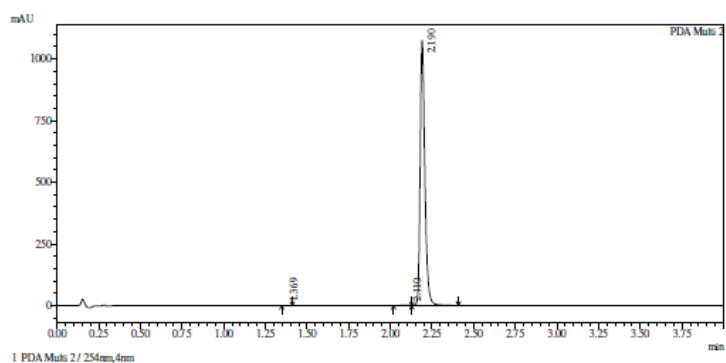

Integration result

| PeakTable |           |           |            |         |         |         |
|-----------|-----------|-----------|------------|---------|---------|---------|
| Peak#     | Ret. Time | USP Width | Resolution | Height  | Area    | Area %  |
| 1         | 1.369     | 0.047     | 0.000      | 893     | 1521    | 0.072   |
| 2         | 2.110     | 0.165     | 6.997      | 1561    | 6537    | 0.308   |
| 3         | 2.190     | 0.051     | 0.746      | 1074831 | 2113036 | 99.620  |
| Total     |           |           |            | 1077285 | 2121094 | 100.000 |

**HRMC** (2*R*,3*R*,4*S*,5*S*)-2-(4-amino-5-ethyl-pyrrolo[2,3-*d*]pyrimidin-7-yl) -5-(1,3-benzothiazol-2-ylsulfanylmethyl)tetrahydrofuran-3,4-diol (**31**)

| Compound Table                 |           |                  |                  |         |           |           |
|--------------------------------|-----------|------------------|------------------|---------|-----------|-----------|
| Label                          | Tgt Score | Mass Error (ppm) | Tgt Formula      | Obs. RT | Ref. Mass | Obs. Mass |
| Cpd 1: C20 H21 N5 O3 S2; 1.953 | 73.38     | -8.84            | C20 H21 N5 O3 S2 | 1.953   | 443.1086  | 443.1047  |

| Obs. <i>m/z</i> | Obs. RT | Obs. Mass | Tgt Formula      | Tgt Mass | Tgt Mass Error (ppm) | Find Cpd's Algorithm |
|-----------------|---------|-----------|------------------|----------|----------------------|----------------------|
| 444.1124        | 1.953   | 443.1047  | C20 H21 N5 O3 S2 | 443.1086 | -8.84                | Find by Formula      |

Compound Chromatograms

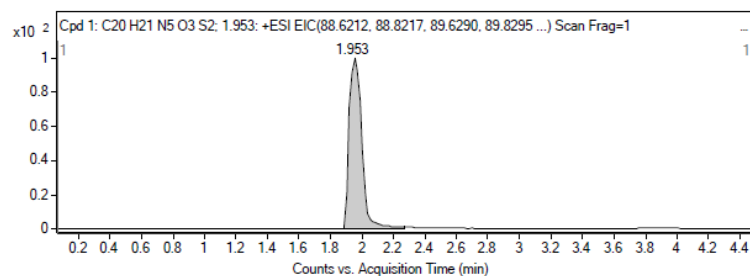

MS Zoomed Spectrum

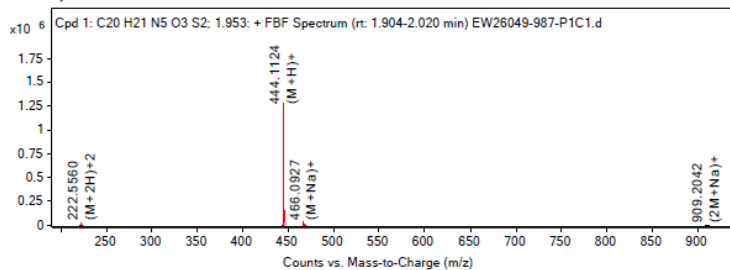

MS Spectrum Peak List

| Obs. <i>m/z</i> | Charge | Abund    | Ion/ Isotope |
|-----------------|--------|----------|--------------|
| 222.5560        | 2      | 28867.12 | (M+2H)+2     |
| 223.0572        | 2      | 7914.34  | (M+2H)+2     |

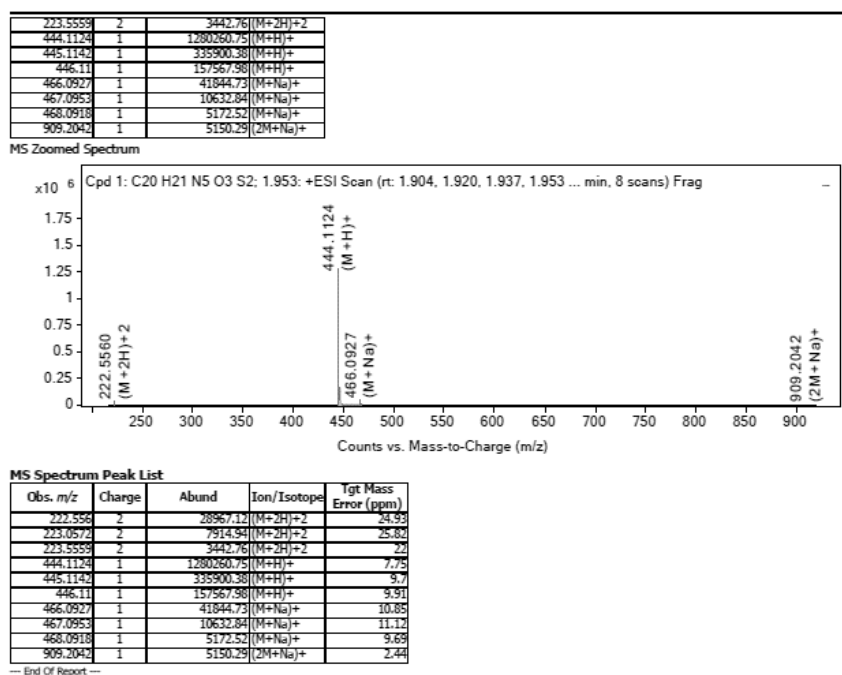

**<sup>1</sup>H NMR** 9-[(2*R*,3*R*,4*R*,5*R*)-5-(azidomethyl)-3,4-bis[[*tert*-butyl(dimethyl)silyl] oxy]tetrahydrofuran-2-yl]purin-6-amine (**107**)

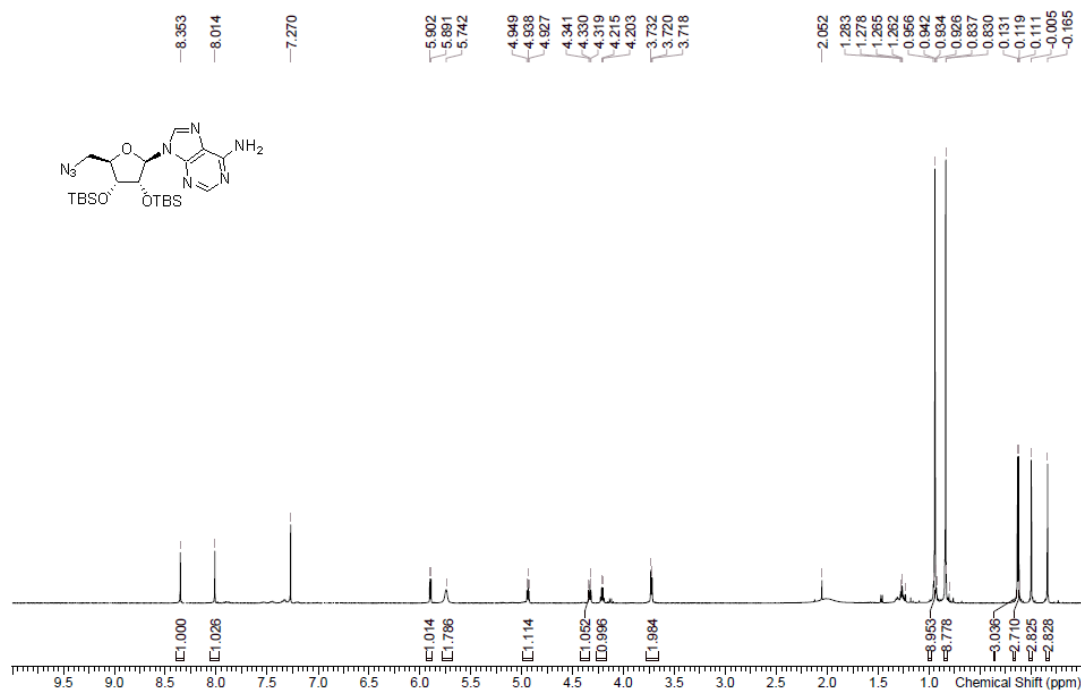

**LCMS** 9-[(2*R*,3*R*,4*R*,5*R*)-5-(azidomethyl)-3,4-bis[[*tert*-butyl(dimethyl)silyl]oxy]tetrahydrofuran-2-yl]purin-6-amine (**107**)

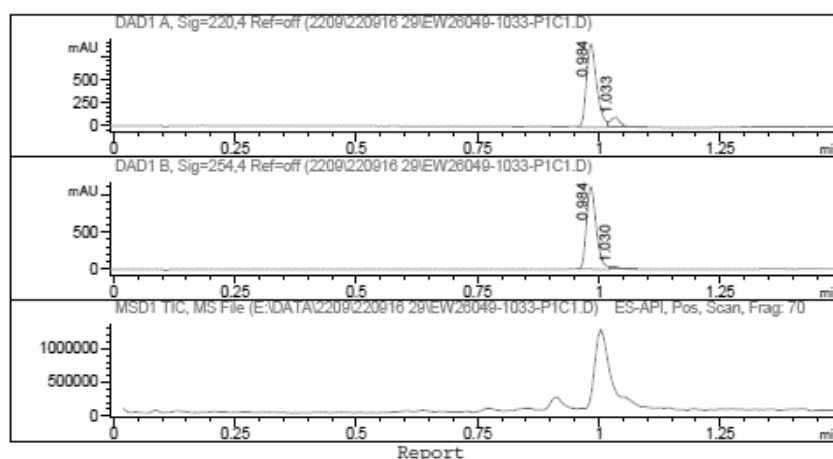

| Report                               |       |       |          |       |          |        |
|--------------------------------------|-------|-------|----------|-------|----------|--------|
| =====                                |       |       |          |       |          |        |
| Signal 1 : DAD1 A, Sig=220.4 Ref=off |       |       |          |       |          |        |
| #                                    | Meas. | Ret.  | Height   | Width | Area     | Area % |
| 1                                    |       | 0.984 | 897.489  | 0.022 | 1325.514 | 89.852 |
| 2                                    |       | 1.033 | 107.453  | 0.021 | 149.712  | 10.148 |
| =====                                |       |       |          |       |          |        |
| Signal 2 : DAD1 B, Sig=254.4 Ref=off |       |       |          |       |          |        |
| #                                    | Meas. | Ret.  | Height   | Width | Area     | Area % |
| 1                                    |       | 0.984 | 1102.536 | 0.021 | 1545.263 | 97.180 |
| 2                                    |       | 1.030 | 35.657   | 0.019 | 44.847   | 2.820  |
| =====                                |       |       |          |       |          |        |

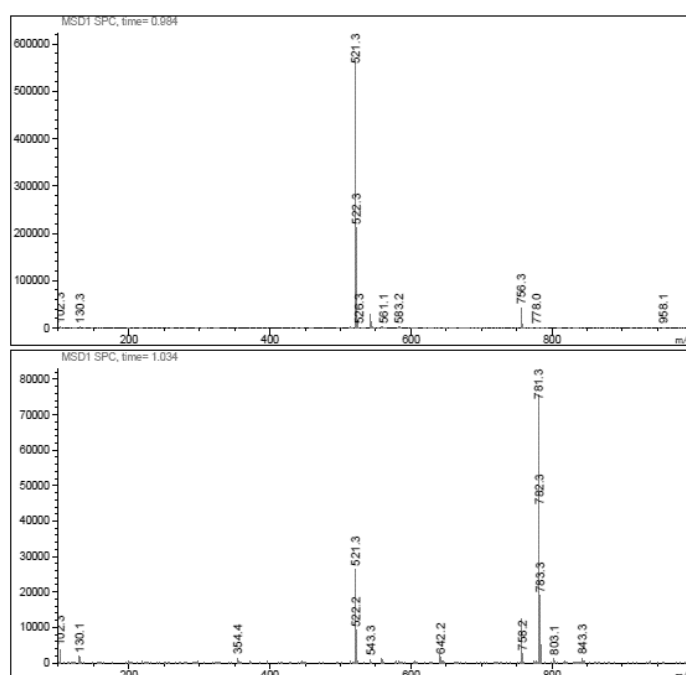

**LCMS** 9-[(2*R*,3*R*,4*R*,5*R*)-5-(Aminomethyl)-3,4-bis[[*tert*-butyl(dimethyl)silyl]oxy]tetrahydrofuran-2-yl]purin-6-amine (**108**)

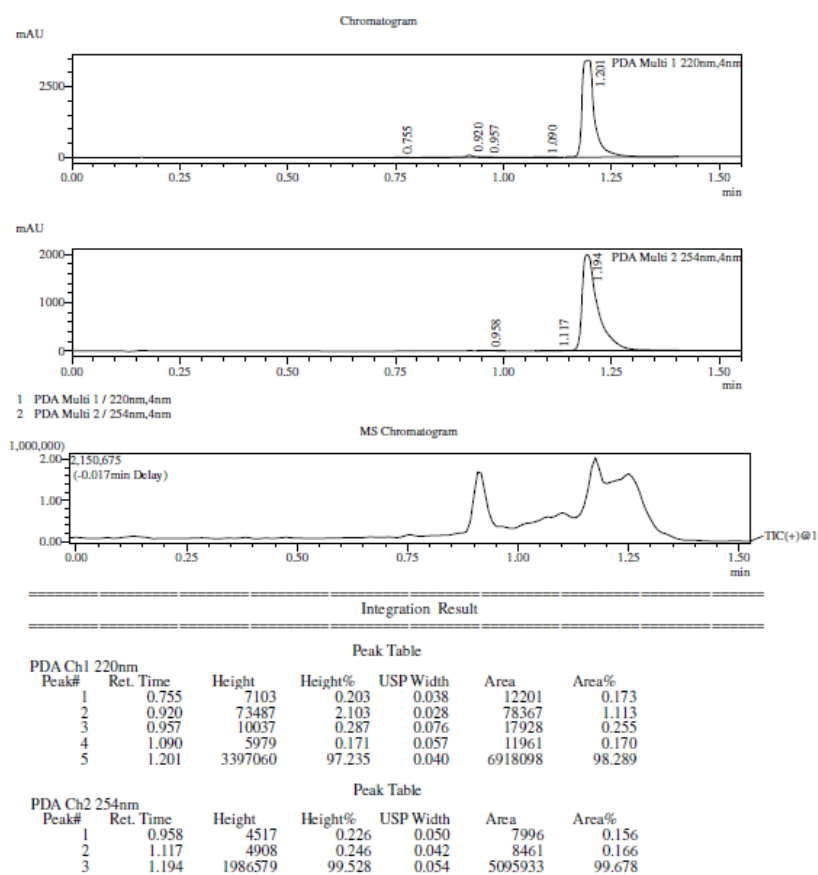

Mass Spectrum  
 RefTime: 0.758 Datafile: D:\DATA\2022\2209\220919\EW26049-1038-P1C1.kcd

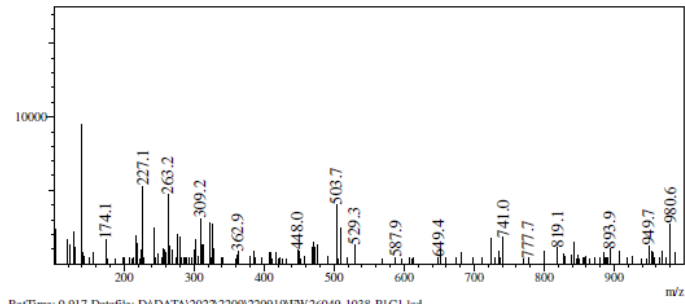

RefTime: 0.917 Datafile: D:\DATA\2022\2209\220919\EW26049-1038-P1C1.kcd

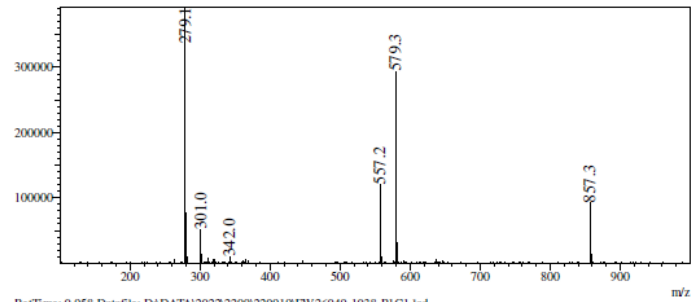

RefTime: 0.958 Datafile: D:\DATA\2022\2209\220919\EW26049-1038-P1C1.kcd

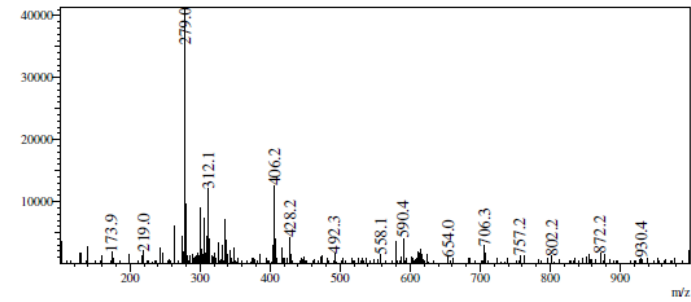

RefTime: 1.092 Datafile: D:\DATA\2022\2209\220919\EW26049-1038-P1C1.kcd

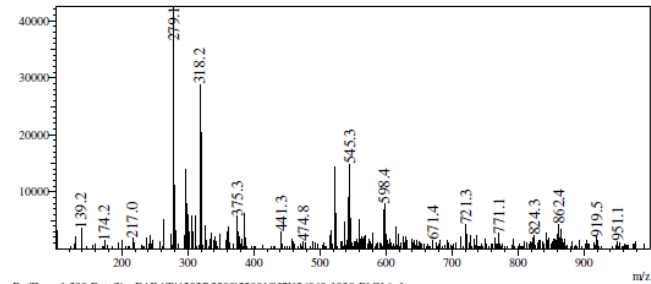

RefTime: 1.200 Datafile: D:\DATA\2022\2209\220919\EW26049-1038-P1C1.kcd

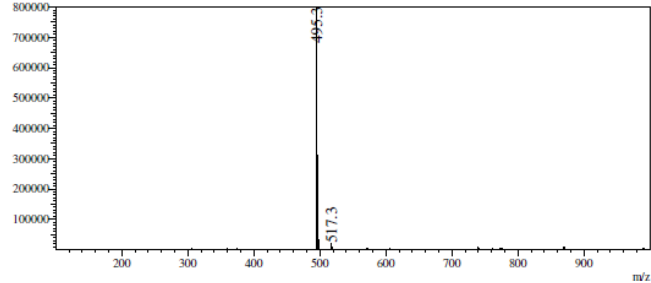

**LCMS *N*-[[[(2*R*,3*R*,4*R*,5*R*)-5-(6-Aminopurin-9-yl)-3,4-bis[[*tert*-butyl (dimethyl)silyl]oxy]tetrahydrofuran-2-yl]methyl]naphthalene-2-sulfonamide (109)**

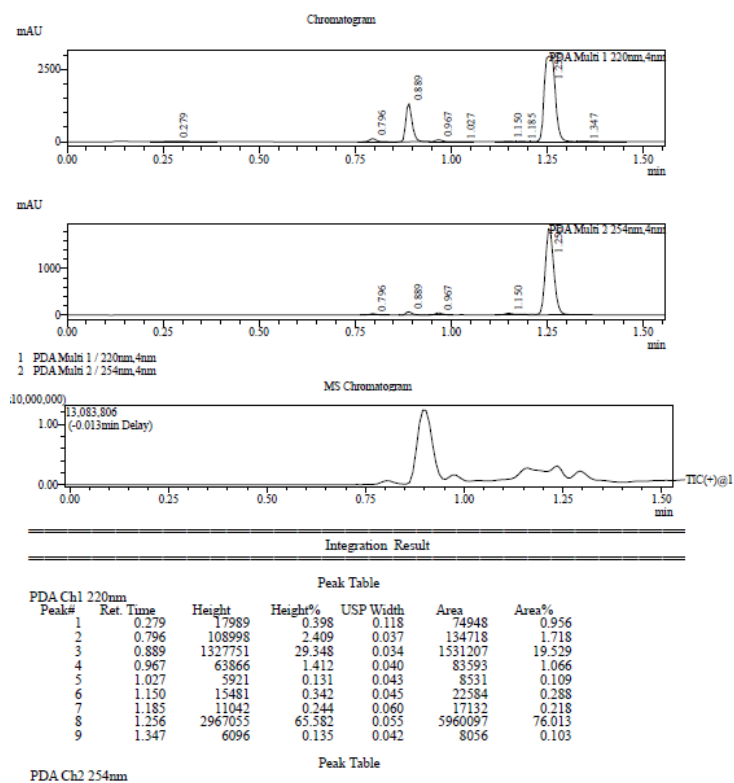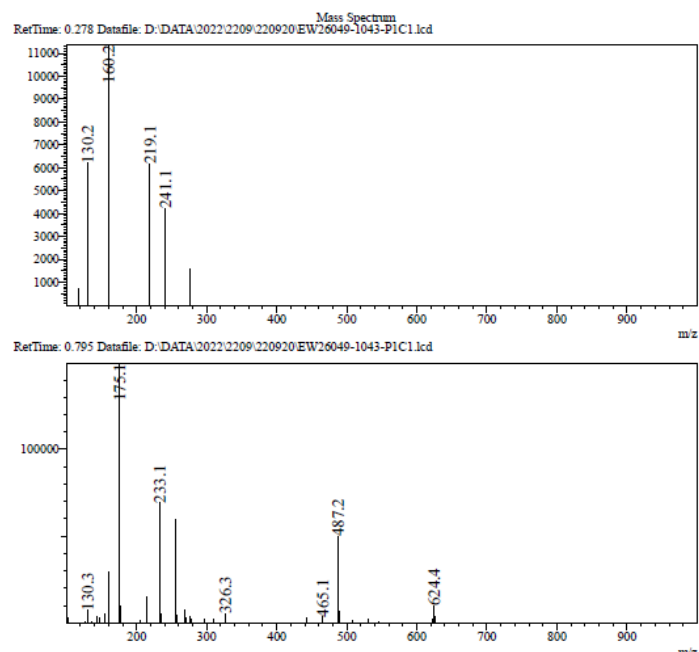

RetTime: 0.887 Datafile: D:\DATA\2022\2209\220920\EW26049-1043-P1C1.lcd

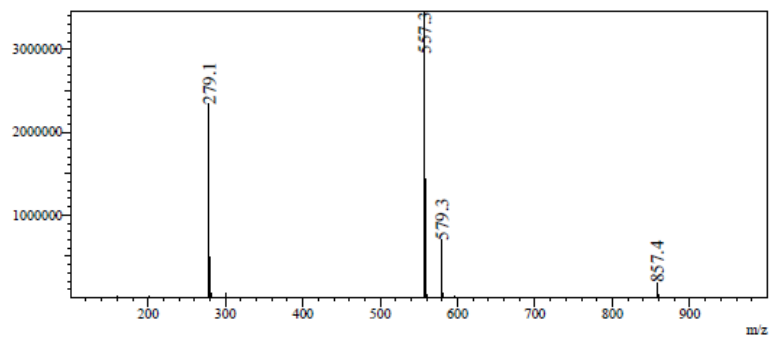

RetTime: 0.970 Datafile: D:\DATA\2022\2209\220920\EW26049-1043-P1C1.lcd

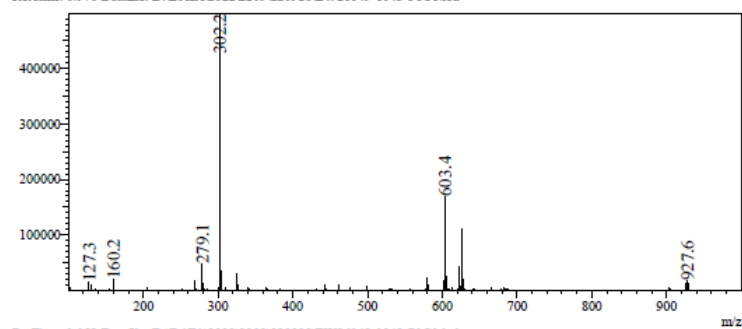

RetTime: 1.153 Datafile: D:\DATA\2022\2209\220920\EW26049-1043-P1C1.lcd

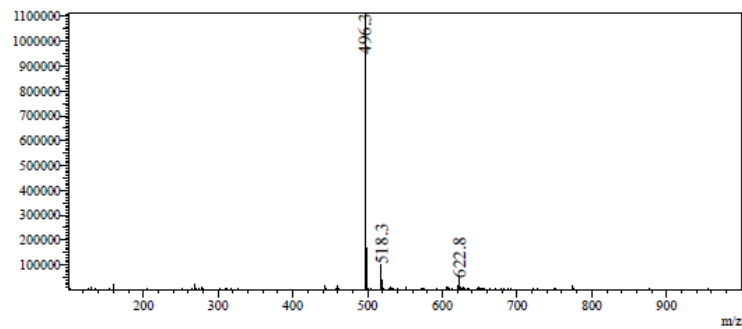

RetTime: 1.253 Datafile: D:\DATA\2022\2209\220920\EW26049-1043-P1C1.lcd

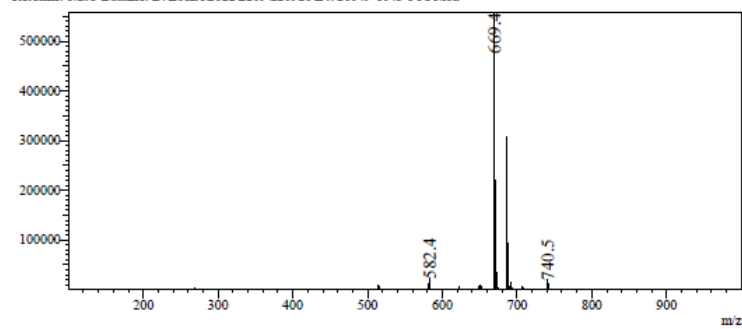



**<sup>1</sup>H NMR** *N*-[[[(2*R*,3*S*,4*R*,5*R*)-5-(6-Aminopurin-9-yl)-3,4-dihydroxy-tetrahydrofuran-2-yl]methyl]naphthalene-2-sulfonamide (**32**)

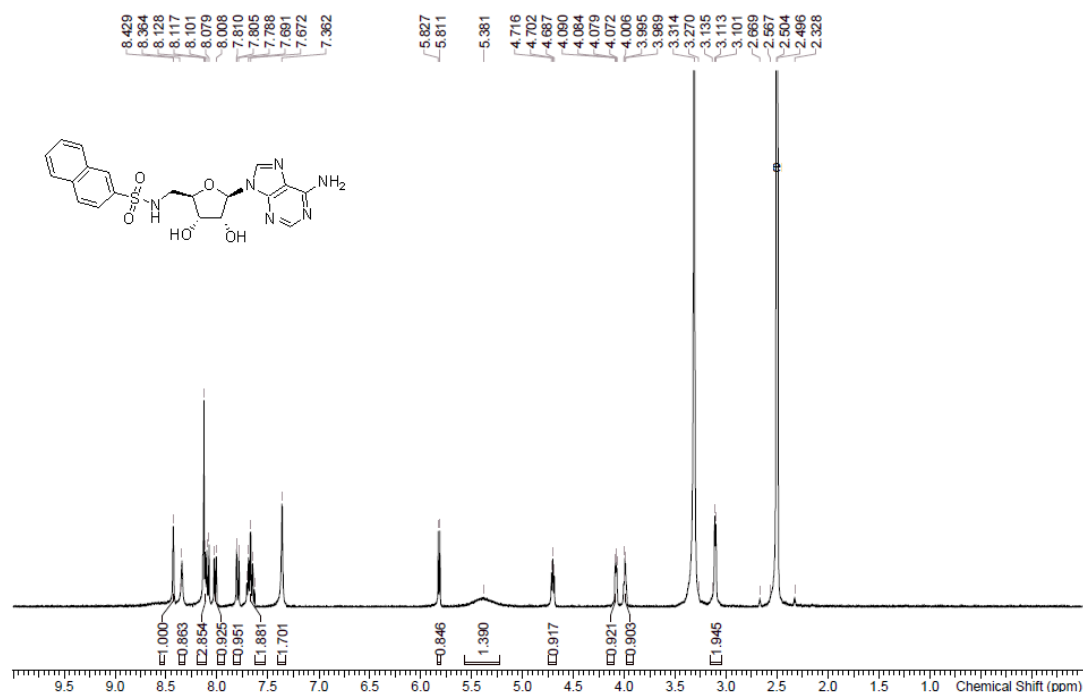

**HPLC** *N*-[[[(2*R*,3*S*,4*R*,5*R*)-5-(6-Aminopurin-9-yl)-3,4-dihydroxy-tetrahydrofuran-2-yl]methyl]naphthalene-2-sulfonamide (**32**)

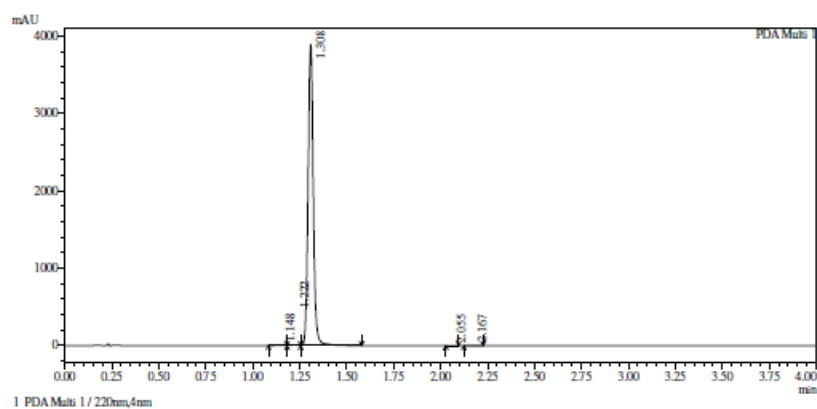

Integration result

| PeakTable |           |          |            |         |         |         |
|-----------|-----------|----------|------------|---------|---------|---------|
| Peak#     | Ret. Time | USPWidth | Resolution | Height  | Area    | Area %  |
| 1         | 1.148     | 0.096    | 0.000      | 6594    | 20683   | 0.274   |
| 2         | 1.222     | 0.086    | 0.814      | 7984    | 24836   | 0.329   |
| 3         | 1.308     | 0.050    | 1.275      | 3898289 | 7490537 | 99.306  |
| 4         | 2.055     | 0.043    | 16.227     | 1620    | 2545    | 0.034   |
| 5         | 2.167     | 0.076    | 1.900      | 1548    | 4263    | 0.057   |
| Total     |           |          |            | 3916035 | 7542863 | 100.000 |

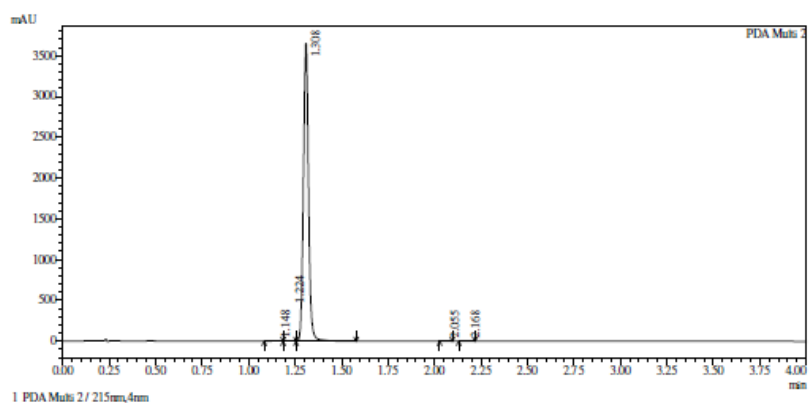

#### Integration result

| PeakTable |           |           |            |         |         |         |
|-----------|-----------|-----------|------------|---------|---------|---------|
| Peak#     | Ret. Time | USP Width | Resolution | Height  | Area    | Area %  |
| 1         | 1.148     | 0.098     | 0.000      | 6377    | 20772   | 0.296   |
| 2         | 1.224     | 0.086     | 0.821      | 7892    | 23905   | 0.341   |
| 3         | 1.308     | 0.050     | 1.238      | 3655501 | 6968253 | 99.282  |
| 4         | 2.055     | 0.042     | 16.225     | 1662    | 2619    | 0.037   |
| 5         | 2.168     | 0.069     | 2.029      | 1232    | 3115    | 0.044   |
| Total     |           |           |            | 3672664 | 7018664 | 100.000 |

**HRMC** *N*-[[[(2*R*,3*S*,4*R*,5*R*)-5-(6-Aminopurin-9-yl)-3,4-dihydroxy-tetrahydrofuran-2-yl)methyl]naphthalene-2-sulfonamide (**32**)

#### Compound Table

| Label                                                                         | Tgt Score | Mass Error (ppm) | Tgt Formula                                                     | Obs. RT | Ref. Mass | Obs. Mass |
|-------------------------------------------------------------------------------|-----------|------------------|-----------------------------------------------------------------|---------|-----------|-----------|
| Cpd 1: C <sub>20</sub> H <sub>20</sub> N <sub>6</sub> O <sub>5</sub> S; 1.382 | 55.63     | 19.37            | C <sub>20</sub> H <sub>20</sub> N <sub>6</sub> O <sub>5</sub> S | 1.382   | 456.1216  | 456.1304  |

| Obs. m/z | Obs. RT | Obs. Mass | Tgt Formula                                                     | Tgt Mass | Tgt Mass Error (ppm) | Find Cpd's Algorithm |
|----------|---------|-----------|-----------------------------------------------------------------|----------|----------------------|----------------------|
| 479.1183 | 1.382   | 456.1304  | C <sub>20</sub> H <sub>20</sub> N <sub>6</sub> O <sub>5</sub> S | 456.1216 | 19.37                | Find by Formula      |

#### Compound Chromatograms

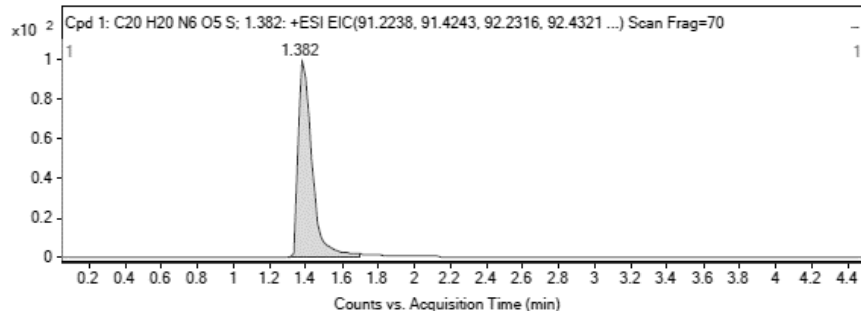

#### MS Zoomed Spectrum

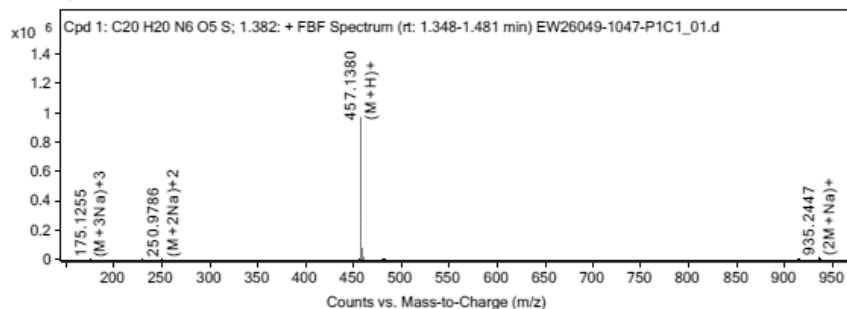

#### MS Spectrum Peak List

| Obs. m/z | Charge | Abund     | Ion/Isotope |
|----------|--------|-----------|-------------|
| 457.138  | 1      | 963804.31 | (M+H)+      |

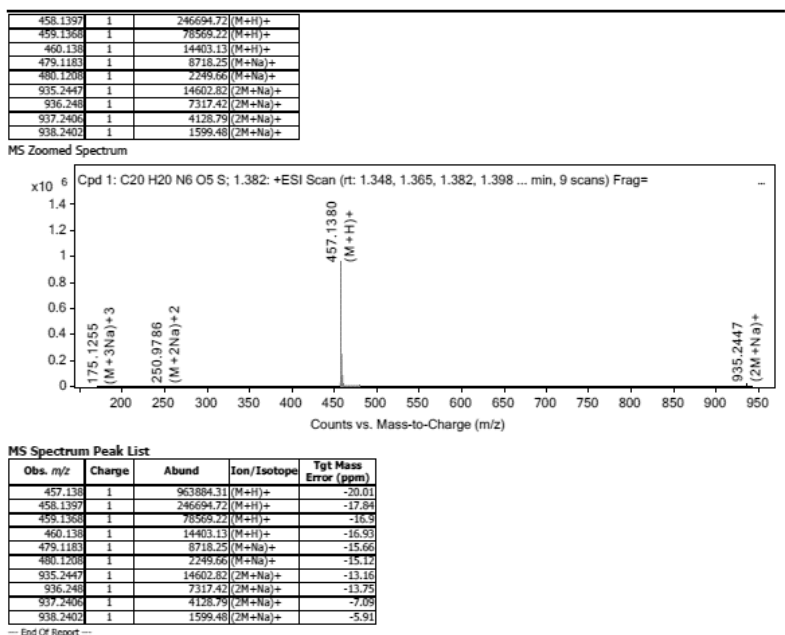

<sup>1</sup>H NMR (2S,3R,4R,5R)-2-(4-Aminopyrrolo[2,1-f][1,2,4]triazin-7-yl)-3,4- dibenzyloxy-5-(benzyloxymethyl)tetrahydrofuran-2-ol (**111**)

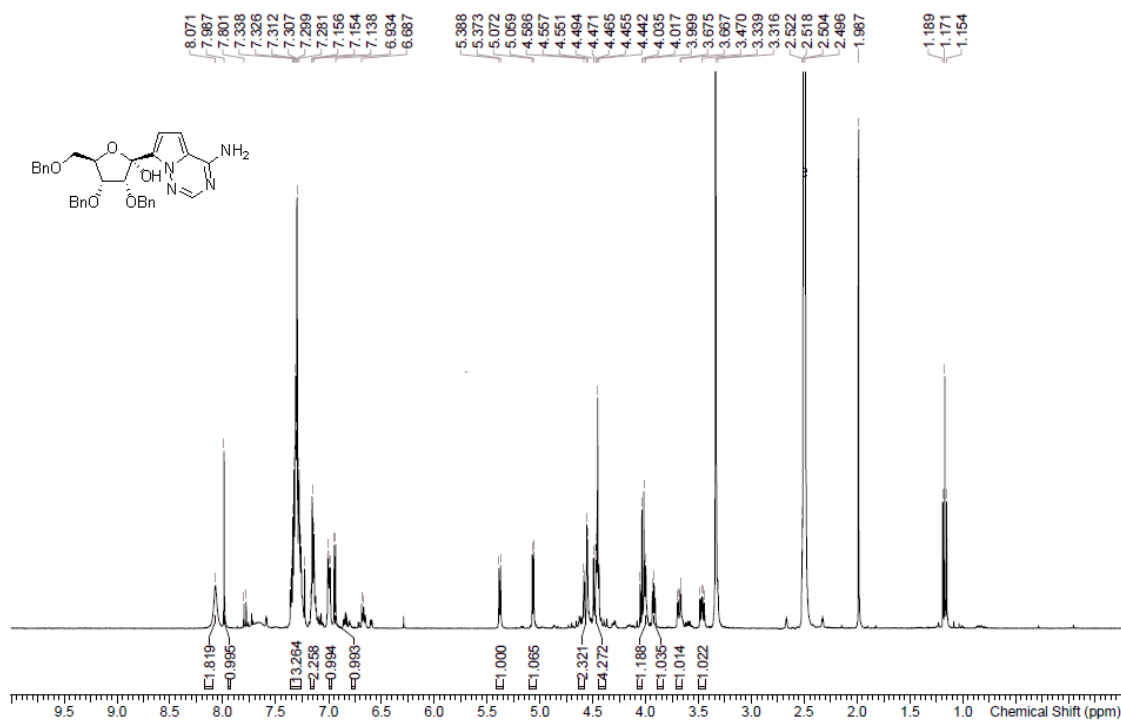

**LCMS (2S,3R,4R,5R)-2-(4-Aminopyrrolo[2,1-f][1,2,4]triazin-7-yl)-3,4- dibenzyloxy-5-(benzyloxymethyl)tetrahydrofuran-2-ol (**111**)**

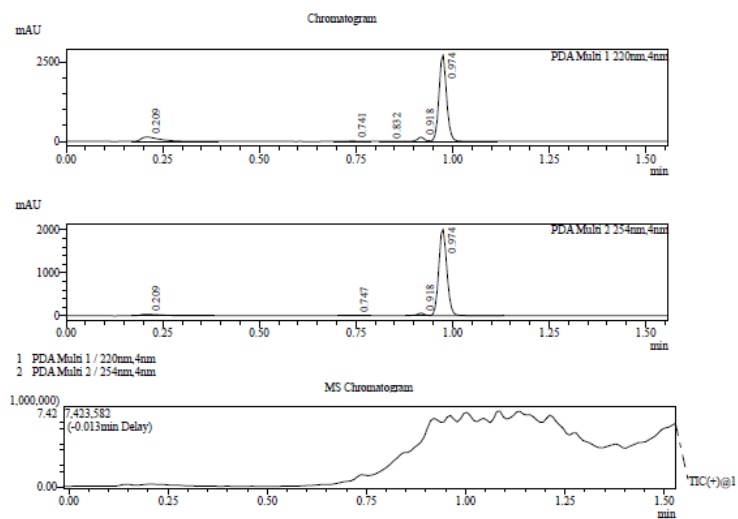

Integration Result

| Peak Table |           |         |         |           |         |        |
|------------|-----------|---------|---------|-----------|---------|--------|
| Peak#      | Ret. Time | Height  | Height% | USP Width | Area    | Area%  |
| 1          | 0.209     | 139773  | 4.625   | 0.091     | 452272  | 10.411 |
| 2          | 0.741     | 17447   | 0.577   | 0.061     | 22276   | 0.513  |
| 3          | 0.832     | 3395    | 0.112   | 0.075     | 5534    | 0.127  |
| 4          | 0.918     | 134929  | 4.464   | 0.036     | 163307  | 3.759  |
| 5          | 0.974     | 2726838 | 90.221  | 0.040     | 3700730 | 85.189 |

| Peak Table |           |        |         |           |        |       |
|------------|-----------|--------|---------|-----------|--------|-------|
| Peak#      | Ret. Time | Height | Height% | USP Width | Area   | Area% |
| 1          | 0.209     | 36619  | 1.727   | 0.092     | 119341 | 3.795 |
| 2          | 0.747     | 2360   | 0.111   | 0.052     | 5190   | 0.165 |
| 3          | 0.918     | 61569  | 2.903   | 0.037     | 76247  | 2.424 |

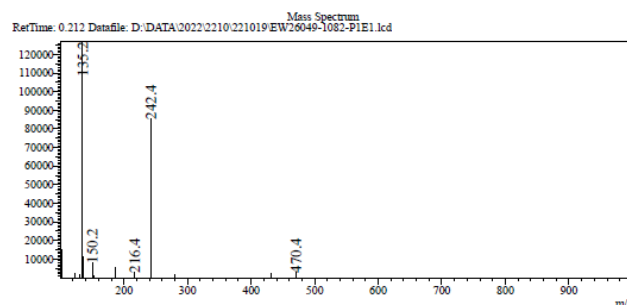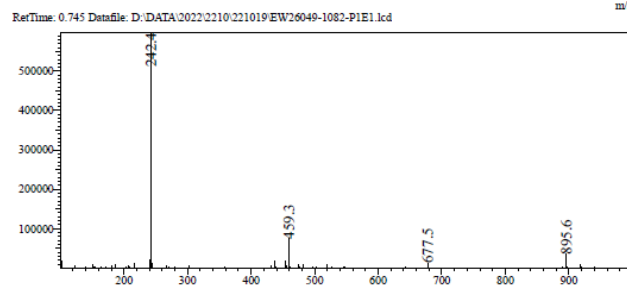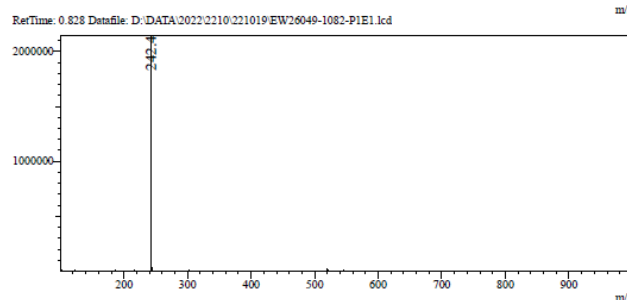

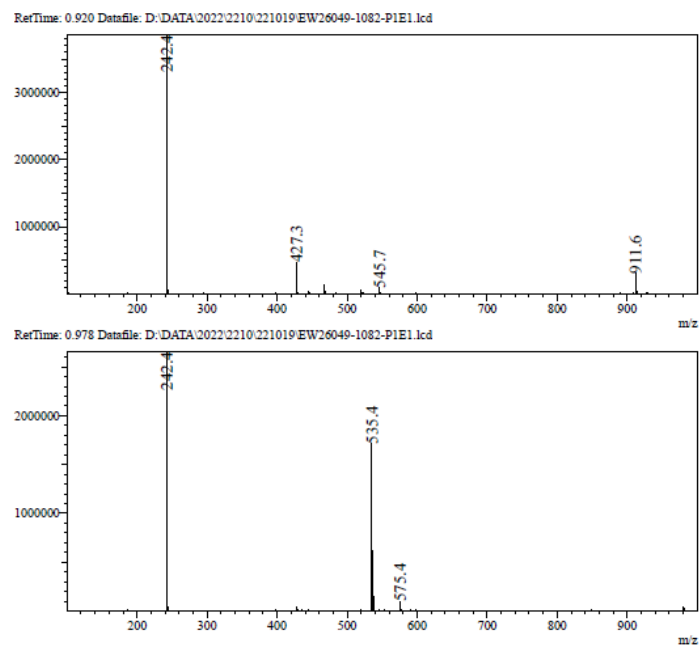

$^1\text{H}$  NMR 7-[(2S,3S,4R,5R)-3,4-Dibenzyloxy-5-(benzyloxymethyl) tetrahydrofuran-2-yl]pyrrolo[2,1-f][1,2,4]triazin-4-amine (**112**)

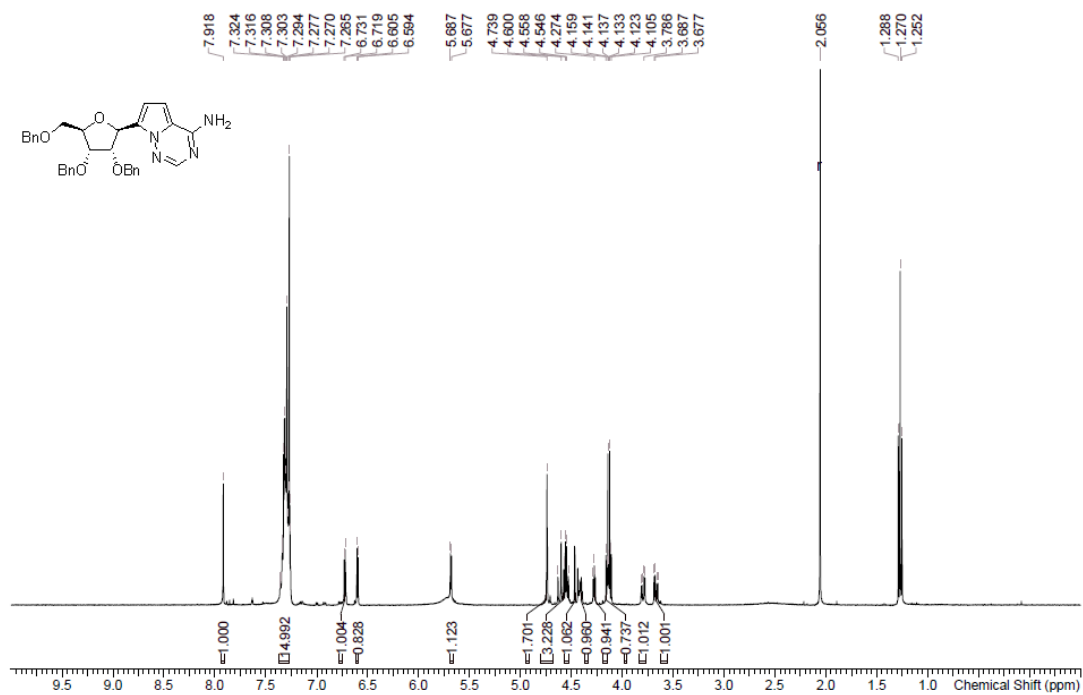

**LCMS 7-[(2S,3S,4R,5R)-3,4-Dibenzyloxy-5-(benzyloxymethyl) tetrahydrofuran-2-yl]pyrrolo[2,1-f][1,2,4]triazin-4-amine (112)**

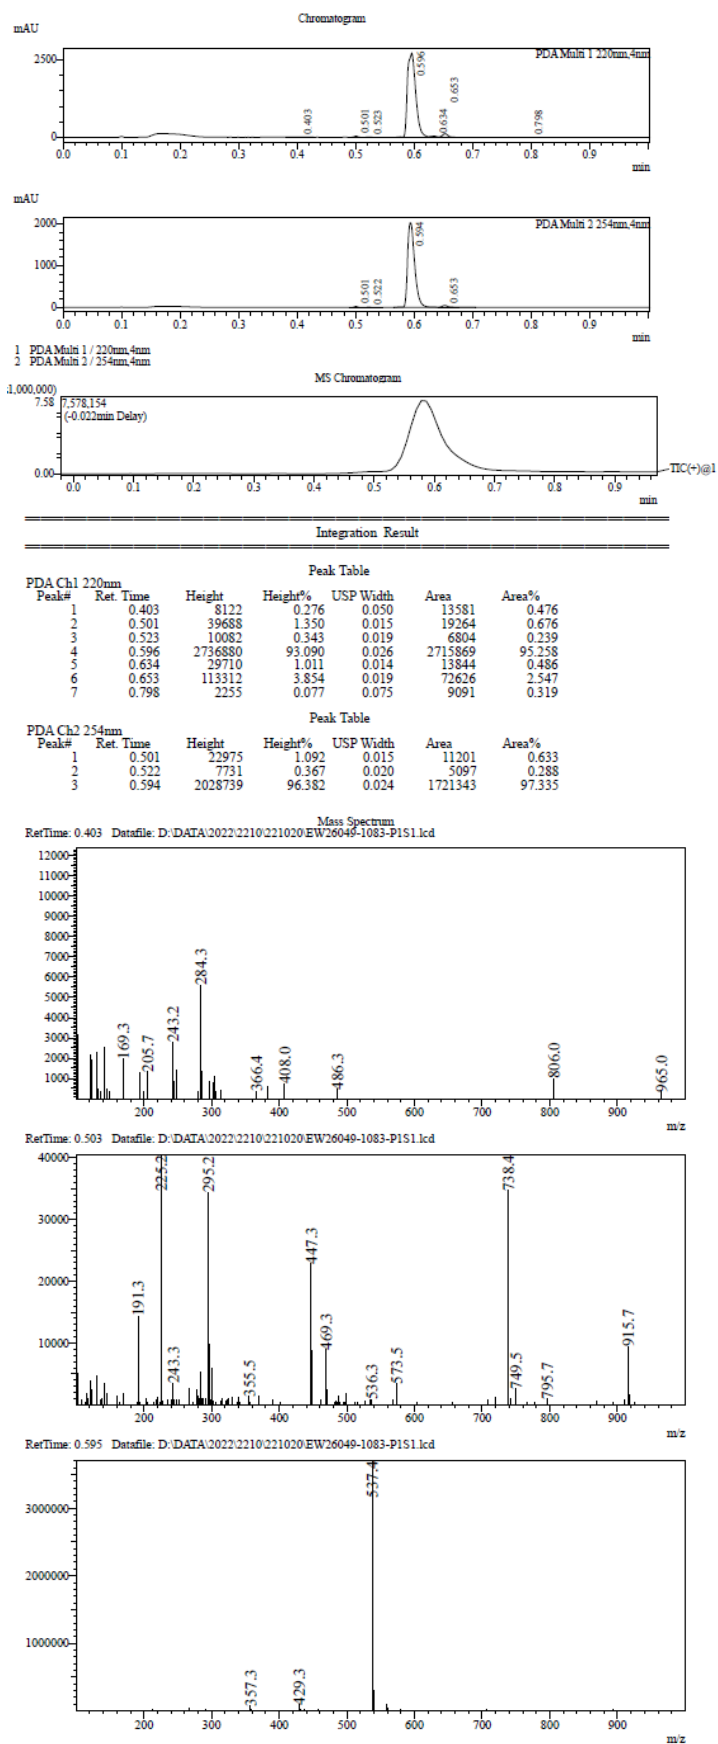

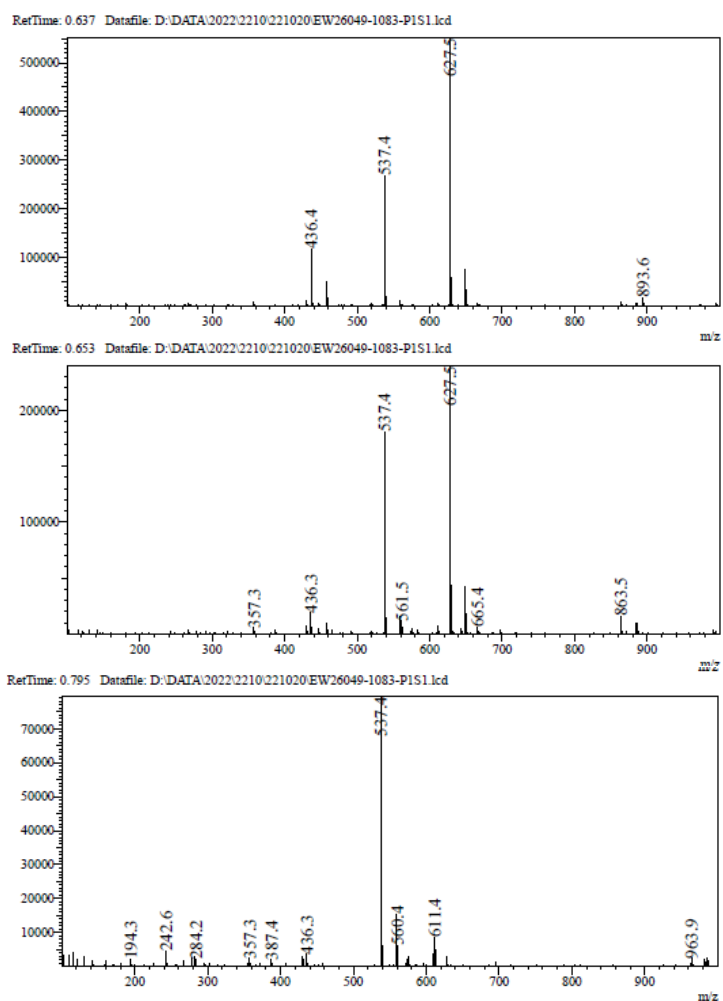

**<sup>1</sup>H NMR (2*S*,3*R*,4*S*,5*R*)-2-(4-Aminopyrrolo[2,1-*f*][1,2,4]triazin-7-yl) -5-(hydroxymethyl)tetrahydrofuran-3,4-diol (113)**

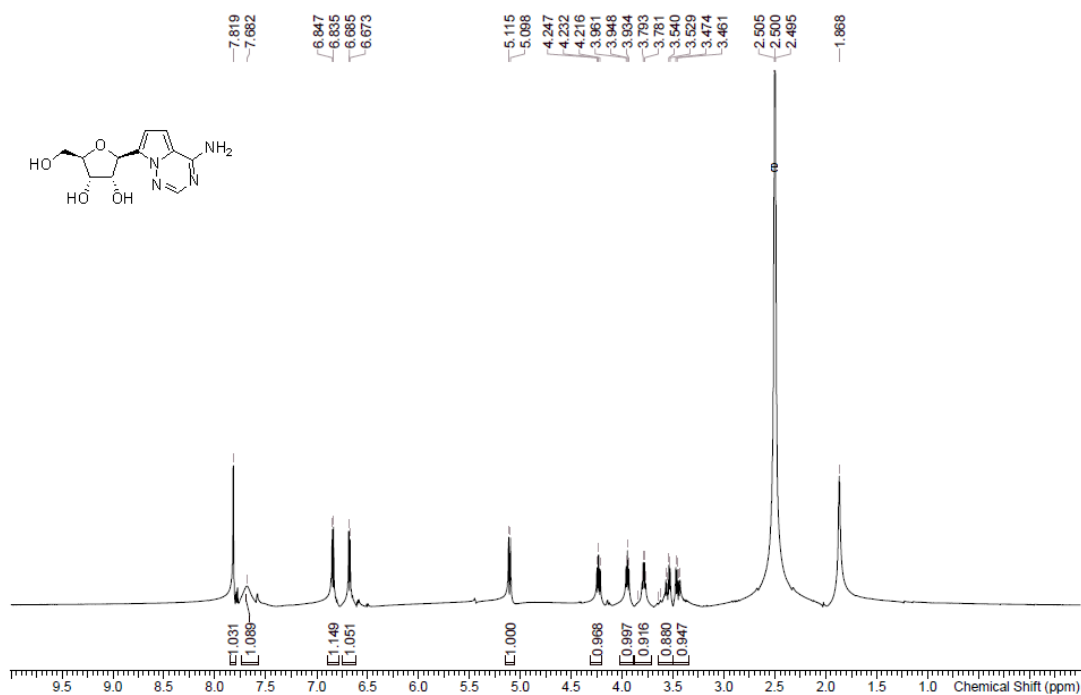

# **LCMS (2S,3R,4S,5R)-2-(4-Aminopyrrolo[2,1-f][1,2,4]triazin-7-yl)-5-(hydroxymethyl)tetrahydrofuran-3,4-diol (**113**)**

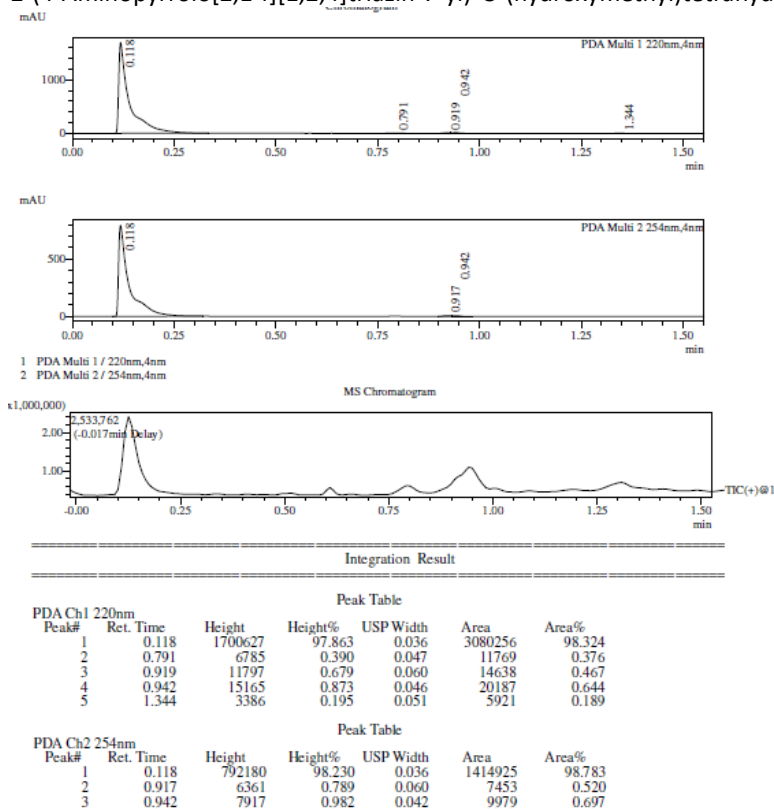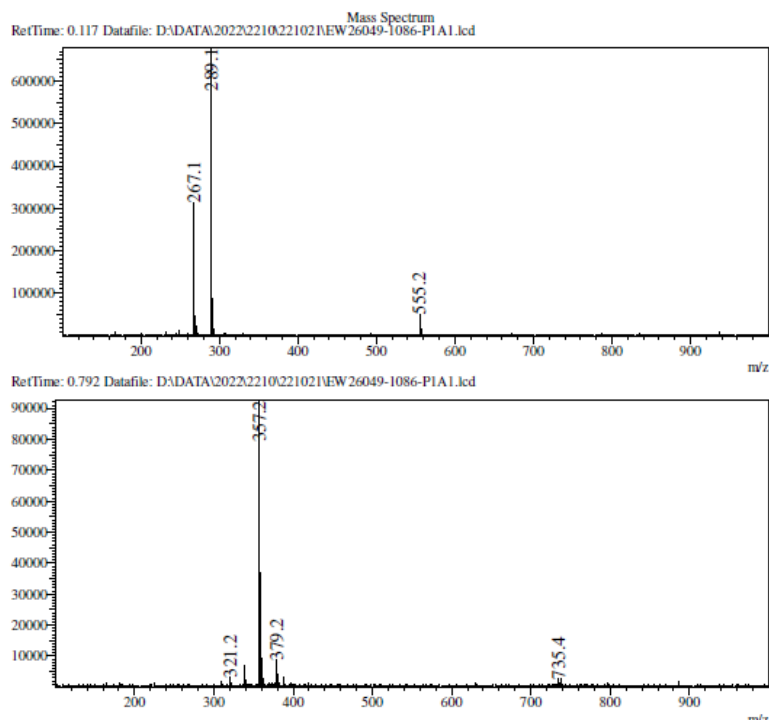



RetTime: 0.917 Datafile: D:\DATA\2022\2210\221021\NEW 26049-1086-PIA1.lcd

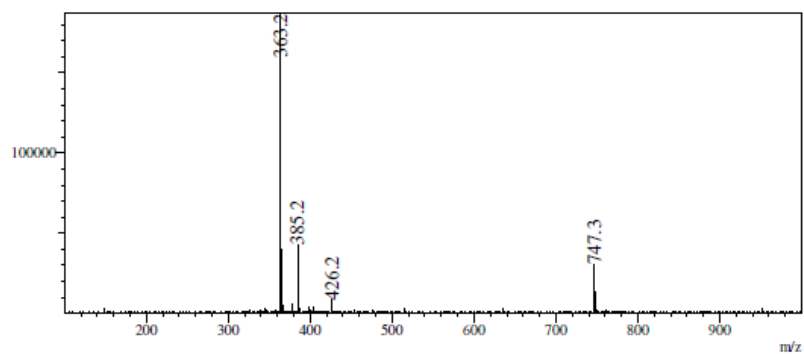

RetTime: 0.942 Datafile: D:\DATA\2022\2210\221021\NEW 26049-1086-PIA1.lcd

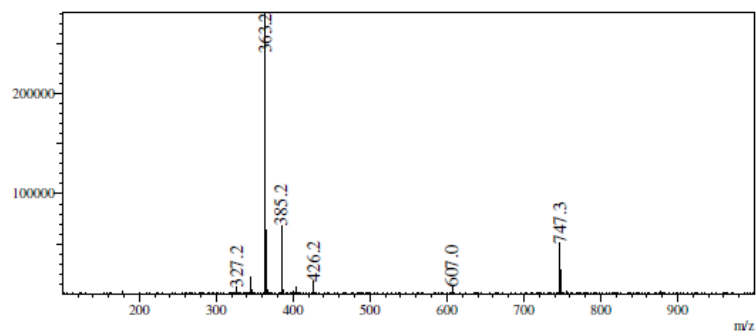

RetTime: 1.342 Datafile: D:\DATA\2022\2210\221021\NEW 26049-1086-PIA1.lcd

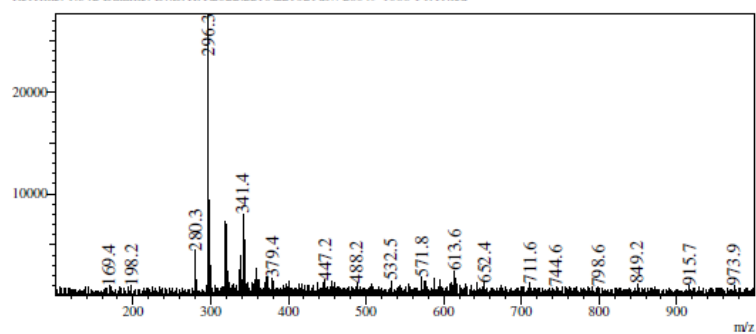

**<sup>1</sup>H NMR** [(3a*S*,4*S*,6*R*,6a*R*)-4-(4-Aminopyrrolo[2,1-*f*][1,2,4]triazin-7-yl)-2,2 -dimethyl-3a,4,6,6a-tetrahydrofuro[3,4-*d*][1,3]dioxol-6-yl)methanol (**114**)

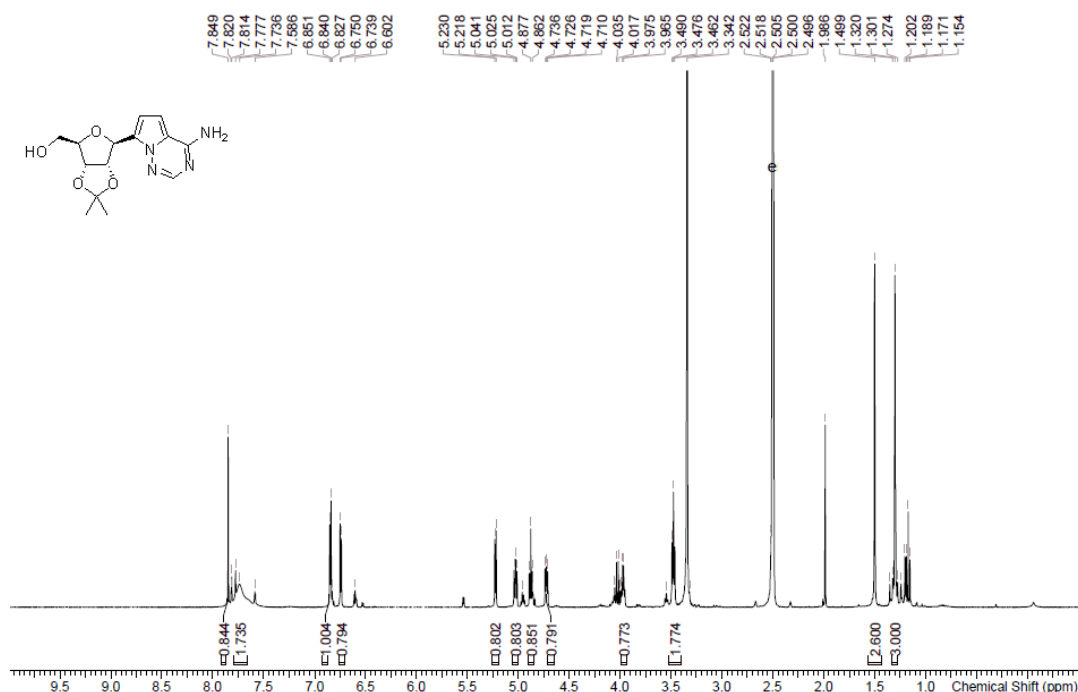

**LCMS** [(3a*S*,4*S*,6*R*,6a*R*)-4-(4-Aminopyrrolo[2,1-*f*][1,2,4]triazin-7-yl)-2,2 -dimethyl-3a,4,6,6a-tetrahydrofuro[3,4-*d*][1,3]dioxol-6-yl)methanol (**114**)

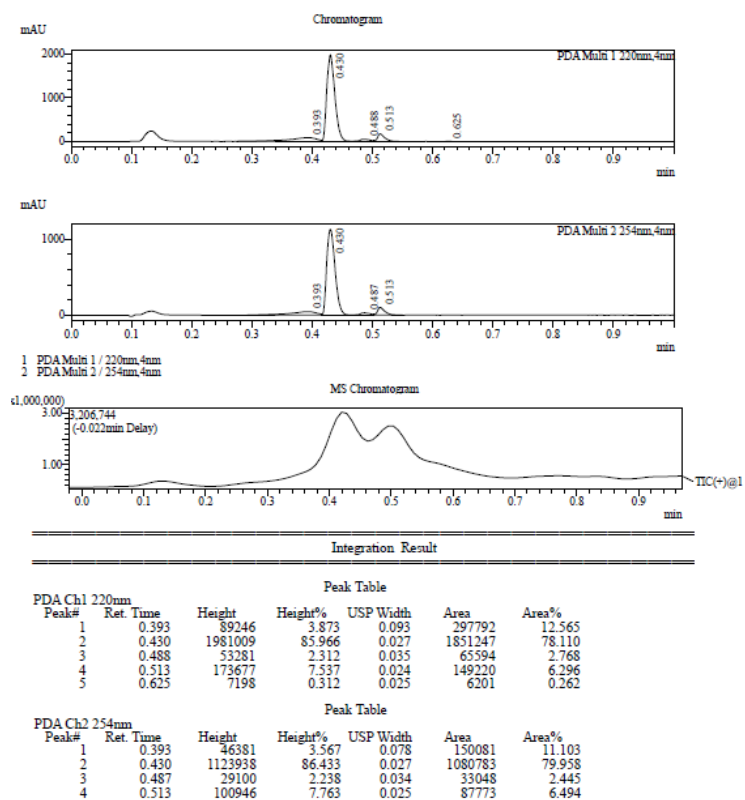

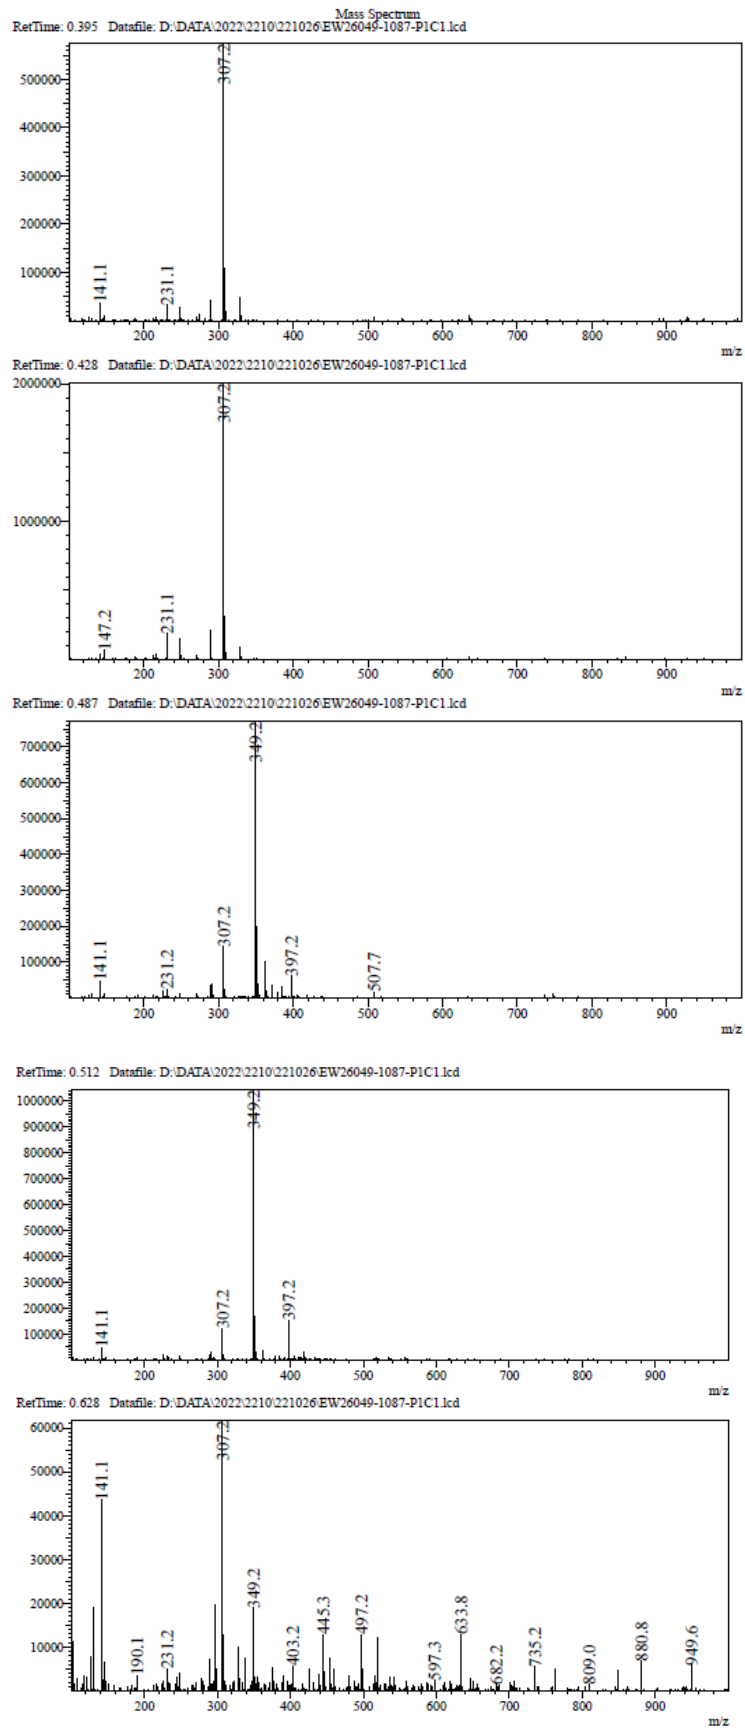

**LCMS 7-[(3a*S*,4*S*,6*R*,6a*R*)-6-(Azidomethyl)-2,2-dimethyl-3a,4,6,6a-tetrahydrofuro[3,4-*d*][1,3]dioxol-4-yl]pyrrolo[2,1-*f*][1,2,4]triazin-4-amine (**115**)**

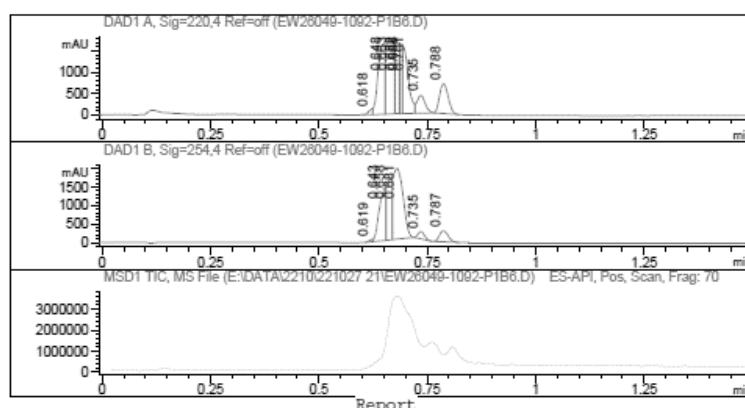

```

=====
Signal 1 : DAD1 A, Sig=220,4 Ref=off
# Meas. Ret. Height Width Area Area %
-----
1 0.618 106.373 0.011 85.019 0.964
2 0.648 1637.115 0.017 1792.176 20.330
3 0.663 1720.668 0.016 2162.343 24.529
4 0.682 1674.983 0.009 1145.922 12.999
5 0.688 1647.396 0.007 653.476 7.413
6 0.701 1309.991 0.019 1464.338 16.611
7 0.735 421.110 0.020 546.329 6.198
8 0.788 694.686 0.023 965.701 10.955
-----
Signal 2 : DAD1 B, Sig=254,4 Ref=off
# Meas. Ret. Height Width Area Area %
-----
1 0.619 53.908 0.010 35.445 0.541
2 0.643 1081.293 0.019 1395.774 21.306
3 0.658 1547.609 0.016 1446.321 22.078
4 0.681 1913.257 0.025 3061.511 46.733
5 0.735 194.248 0.017 202.960 3.098
6 0.787 293.950 0.022 409.085 6.245
-----
  
```

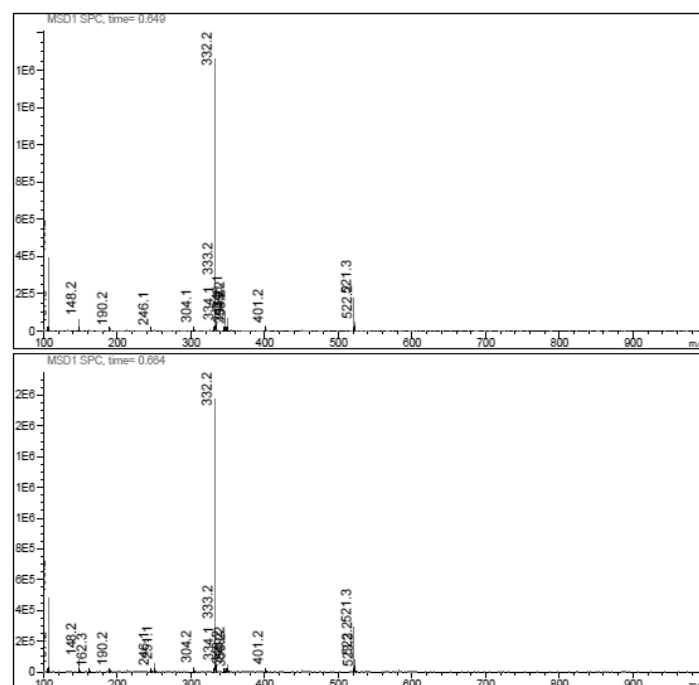

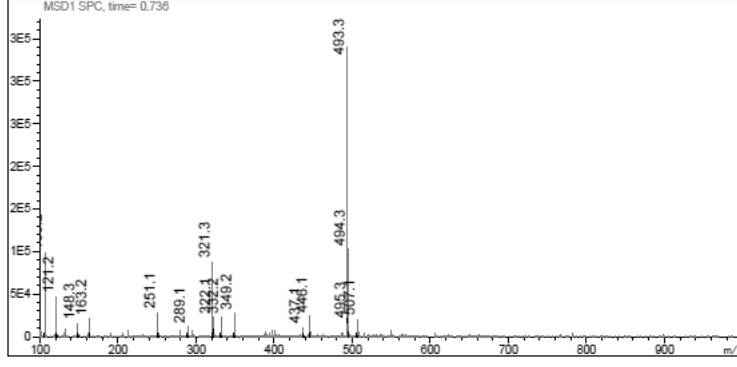

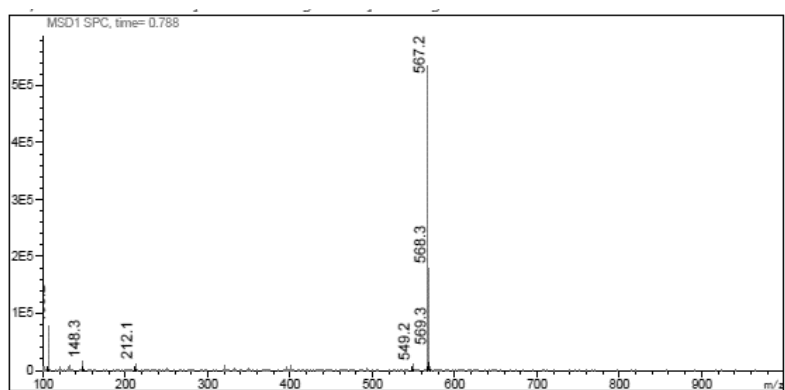

**LCMS** 7-[(3aS,4S,6R,6aR)-6-(Aminomethyl)-2,2-dimethyl-3a,4,6,6a-tetrahydrofuro[3,4-d][1,3]dioxol-4-yl]pyrrolo[2,1-f][1,2,4]triazin-4-amine (**116**)

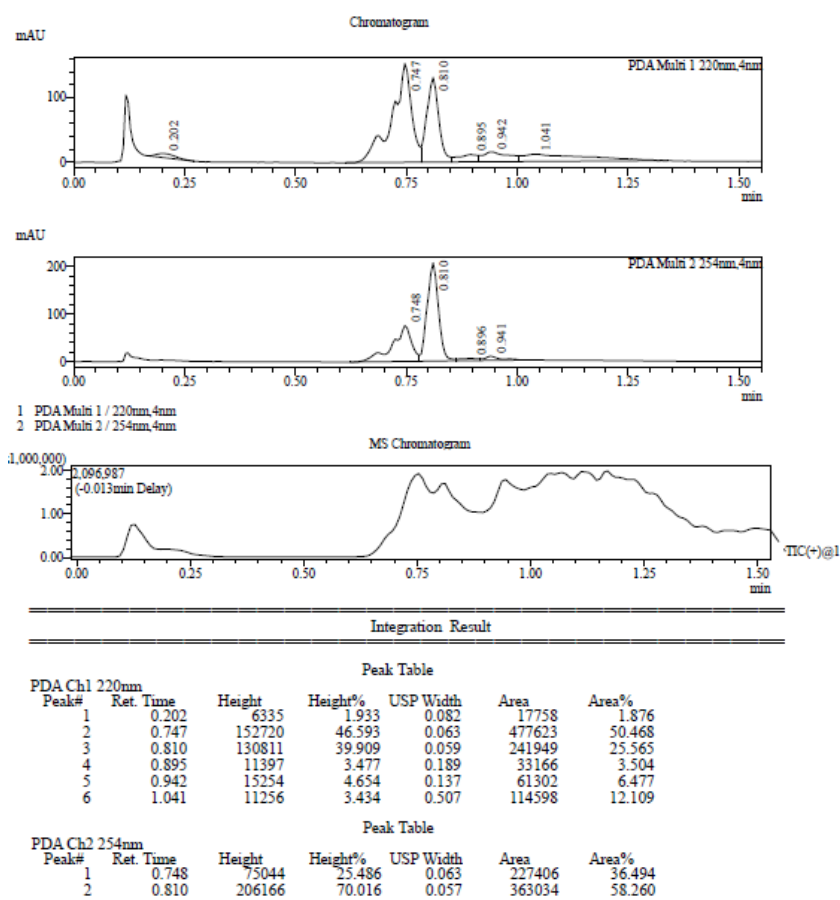

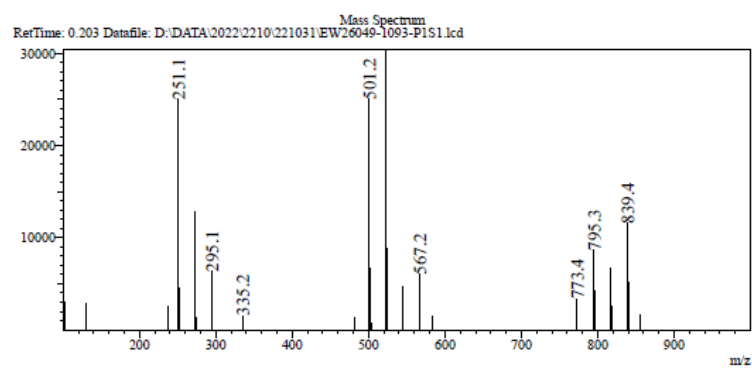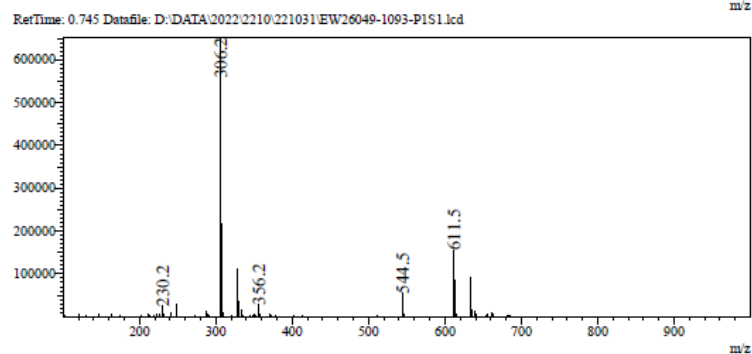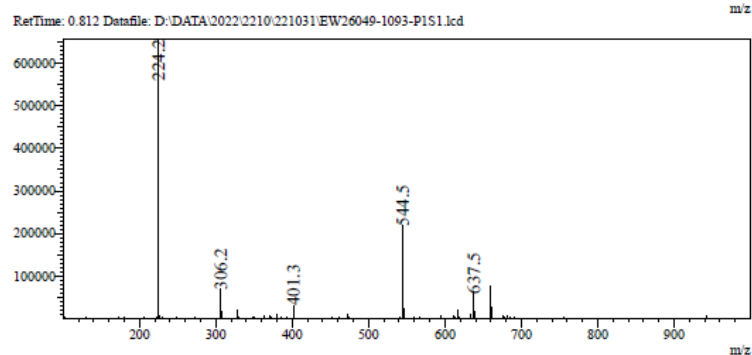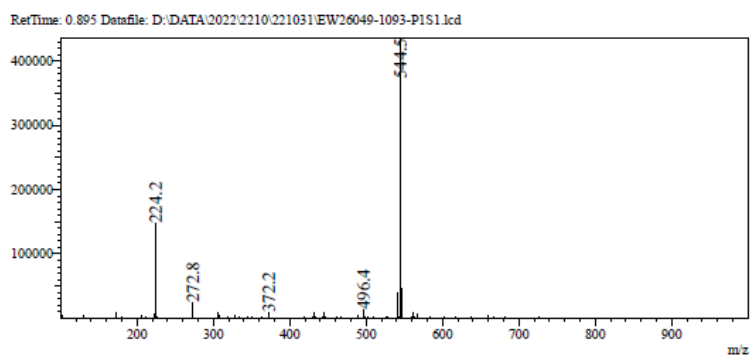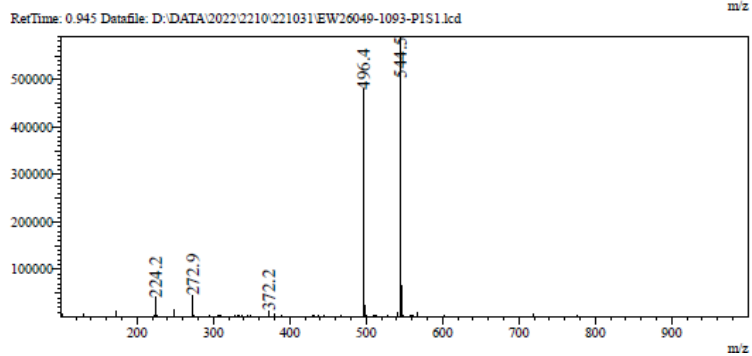

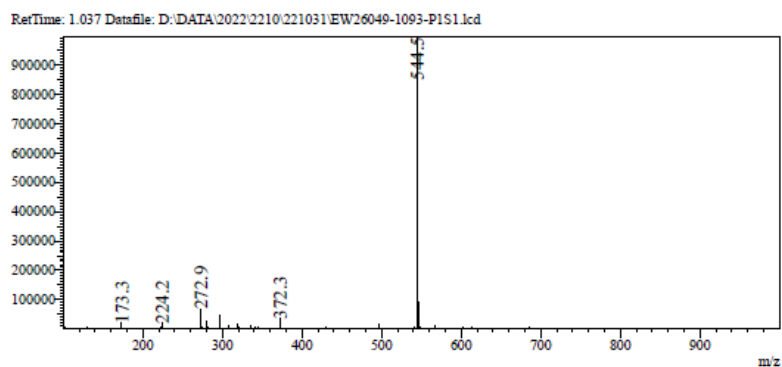

**LCMS (2R,3S,4R,5S)-2-(Aminomethyl)-5-(4-aminopyrrolo[2,1-f][1,2,4] triazin-7-yl)tetrahydrofuran-3,4-diol (117)**

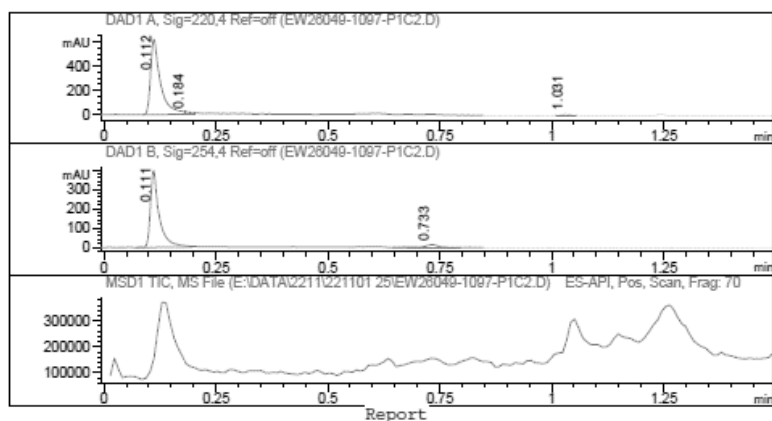

```
=====
```

| Signal 1 : DAD1 A, Sig=220,4 Ref=off |       |         |        |       |         |        |
|--------------------------------------|-------|---------|--------|-------|---------|--------|
| #                                    | Meas. | Ret.    | Height | Width | Area    | Area % |
| 1                                    | 0.112 | 619.410 | 0.022  |       | 946.249 | 95.803 |
| 2                                    | 0.184 | 19.870  | 0.012  |       | 17.703  | 1.792  |
| 3                                    | 1.031 | 19.416  | 0.020  |       | 23.747  | 2.404  |

```
-----
```

| Signal 2 : DAD1 B, Sig=254,4 Ref=off |       |         |        |       |         |        |
|--------------------------------------|-------|---------|--------|-------|---------|--------|
| #                                    | Meas. | Ret.    | Height | Width | Area    | Area % |
| 1                                    | 0.111 | 396.627 | 0.019  |       | 541.895 | 92.847 |
| 2                                    | 0.733 | 16.556  | 0.035  |       | 41.748  | 7.153  |

```
-----
```



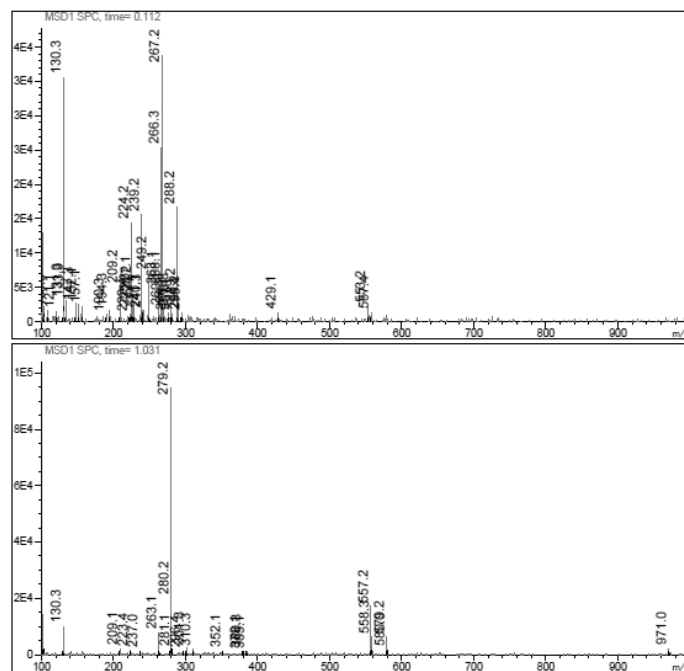

**<sup>1</sup>H NMR** *N*-[[(2*R*,3*S*,4*R*,5*S*)-5-(4-Aminopyrrolo[2,1-*f*][1,2,4]triazin-7-yl)-3,4-dihydroxy-tetrahydrofuran-2-yl)methyl]naphthalene-2-sulfonamide (**34**)

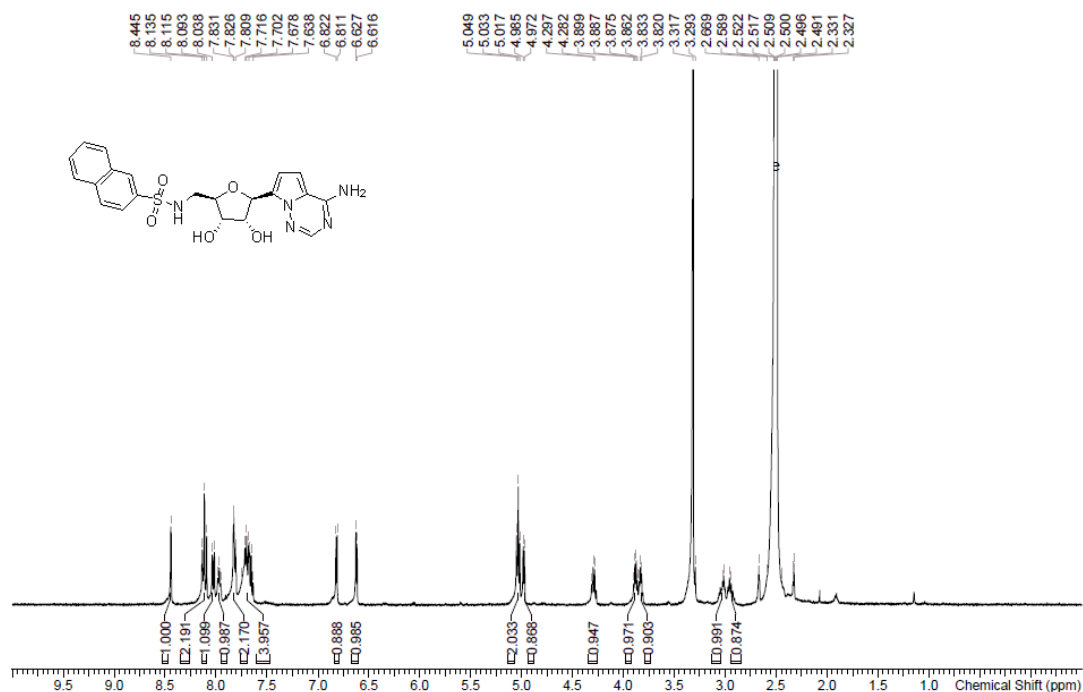

**HPLC *N*-[[[(2*R*,3*S*,4*R*,5*S*)-5-(4-Aminopyrrolo[2,1-*f*][1,2,4]triazin-7-yl)-3,4-dihydroxy-tetrahydrofuran-2-yl]methyl]naphthalene-2-sulfonamide (34)**

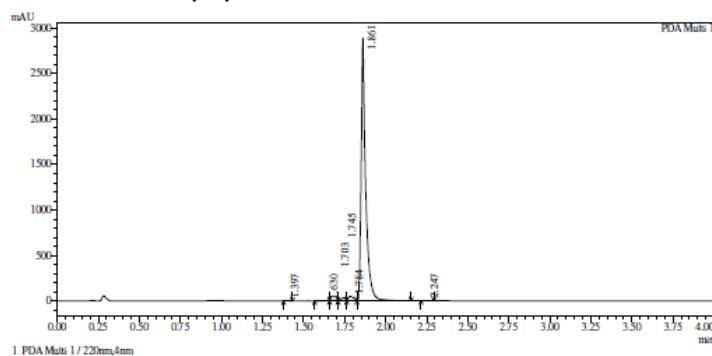

Integration result

| PeakTable |           |          |            |         |         |         |
|-----------|-----------|----------|------------|---------|---------|---------|
| Peak#     | Ret. Time | USPWidth | Resolution | Height  | Area    | Area %  |
| 1         | 1.397     | 0.043    | 0.000      | 702     | 1066    | 0.019   |
| 2         | 1.630     | 0.125    | 2.792      | 3571    | 10988   | 0.193   |
| 3         | 1.703     | 0.535    | 0.220      | 7029    | 14769   | 0.260   |
| 4         | 1.745     | 0.079    | 0.137      | 33177   | 68410   | 1.203   |
| 5         | 1.784     | 0.079    | 0.498      | 49412   | 125124  | 2.199   |
| 6         | 1.861     | 0.045    | 1.236      | 2893192 | 5466691 | 96.094  |
| 7         | 2.247     | 0.066    | 6.991      | 796     | 1847    | 0.032   |
| Total     |           |          |            | 2987881 | 5688896 | 100.000 |

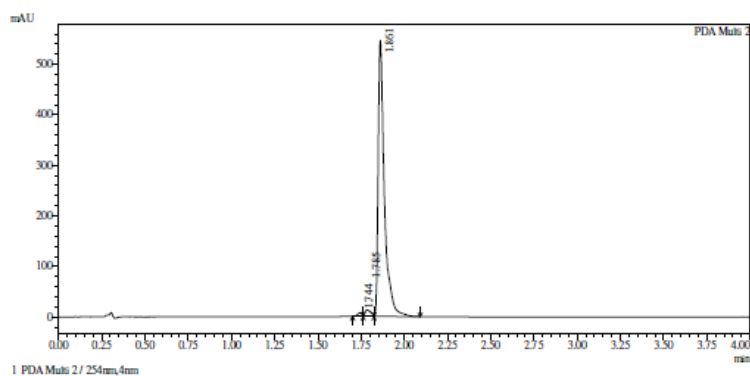

Integration result

| PeakTable |           |          |            |        |         |         |
|-----------|-----------|----------|------------|--------|---------|---------|
| Peak#     | Ret. Time | USPWidth | Resolution | Height | Area    | Area %  |
| 1         | 1.744     | 0.079    | 0.000      | 6956   | 13230   | 0.935   |
| 2         | 1.785     | 0.079    | 0.506      | 12972  | 33163   | 2.345   |
| 3         | 1.861     | 0.060    | 1.090      | 545778 | 1367928 | 96.720  |
| Total     |           |          |            | 565707 | 1414320 | 100.000 |

**HRMS** *N*-[[[(2*R*,3*S*,4*R*,5*S*)-5-(4-Aminopyrrolo[2,1-*f*][1,2,4]triazin-7-yl)-3,4- dihydroxy-tetrahydrofuran-2-yl)methyl]naphthalene-2-sulfonamide (**34**)

Compound Table

| Label                         | Tgt Score | Mass Error (ppm) | Tgt Formula     | Obs. RT | Ref. Mass | Obs. Mass |
|-------------------------------|-----------|------------------|-----------------|---------|-----------|-----------|
| Cpd 1: C21 H21 N5 O5 S; 1.763 | 99.38     | -2.2             | C21 H21 N5 O5 S | 1.763   | 455.1263  | 455.1253  |

| Obs. <i>m/z</i> | Obs. RT | Obs. Mass | Tgt Formula     | Tgt Mass | Tgt Mass Error (ppm) | Find Cpd's Algorithm |
|-----------------|---------|-----------|-----------------|----------|----------------------|----------------------|
| 933.2426        | 1.763   | 455.1253  | C21 H21 N5 O5 S | 455.1263 | -2.2                 | Find by Formula      |

Compound Chromatograms

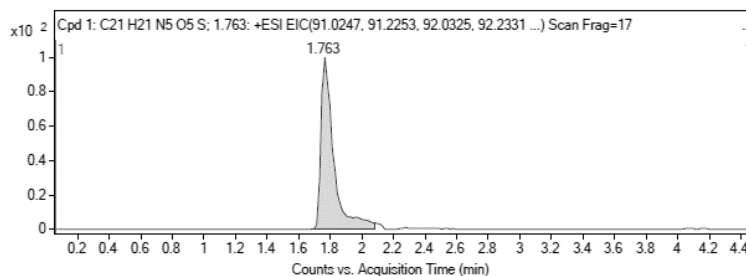

MS Zoomed Spectrum

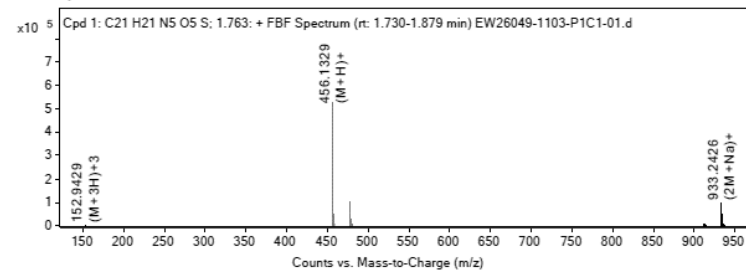

MS Spectrum Peak List

| Obs. <i>m/z</i> | Charge | Abund     | Ion/Isotope |
|-----------------|--------|-----------|-------------|
| 456.1329        | 1      | 525477.63 | (M+H)+      |

|          |   |           |          |
|----------|---|-----------|----------|
| 457.1349 | 1 | 141160.06 | (M+H)+   |
| 458.1321 | 1 | 43942.77  | (M+H)+   |
| 478.1134 | 1 | 104244.06 | (M+Na)+  |
| 479.1154 | 1 | 27611.89  | (M+Na)+  |
| 480.1133 | 1 | 8924.78   | (M+Na)+  |
| 933.2426 | 1 | 101136.81 | (2M+Na)+ |
| 934.2441 | 1 | 51969.36  | (2M+Na)+ |
| 935.2431 | 1 | 23879.92  | (2M+Na)+ |
| 936.2436 | 1 | 8033.02   | (2M+Na)+ |

MS Zoomed Spectrum

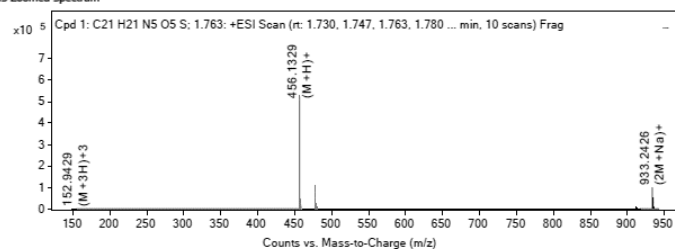

MS Spectrum Peak List

| Obs. <i>m/z</i> | Charge | Abund     | Ion/Isotope | Tgt Mass Error (ppm) |
|-----------------|--------|-----------|-------------|----------------------|
| 456.1329        | 1      | 525477.63 | (M+H)+      | 1.59                 |
| 457.1349        | 1      | 141160.06 | (M+H)+      | 3.46                 |
| 458.1321        | 1      | 43942.77  | (M+H)+      | 4.29                 |
| 478.1134        | 1      | 104244.06 | (M+Na)+     | 4.52                 |
| 479.1154        | 1      | 27611.89  | (M+Na)+     | 6.23                 |
| 480.1133        | 1      | 8924.78   | (M+Na)+     | 5.57                 |
| 933.2426        | 1      | 101136.81 | (2M+Na)+    | -0.79                |
| 934.2441        | 1      | 51969.36  | (2M+Na)+    | 0.01                 |
| 935.2431        | 1      | 23879.92  | (2M+Na)+    | 0.62                 |
| 936.2436        | 1      | 8033.02   | (2M+Na)+    | 0.84                 |

--- End Of Report ---

**<sup>1</sup>H NMR** 7-[(2*S*,3*S*,4*R*,5*R*)-3,4-Bis[[tert-butyl(dimethyl)silyl]oxy]-5-[[tert-butyl(dimethyl)silyl]oxymethyl]tetrahydrofuran-2-yl]pyrrolo[2,1-*f*][1,2,4]triazin-4-amine (**118**)

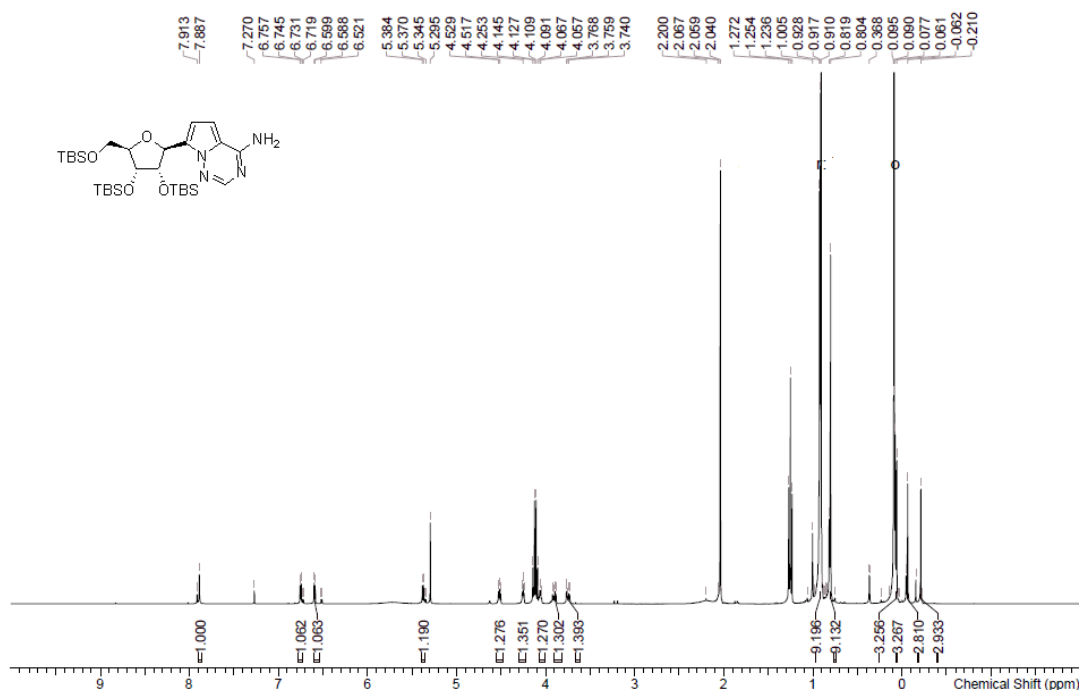

**LCMS** 7-[(2*S*,3*S*,4*R*,5*R*)-3,4-Bis[[tert-butyl(dimethyl)silyl]oxy]-5-[[tert-butyl(dimethyl)silyl]oxymethyl]tetrahydrofuran-2-yl]pyrrolo[2,1-*f*][1,2,4]triazin-4-amine (**118**)

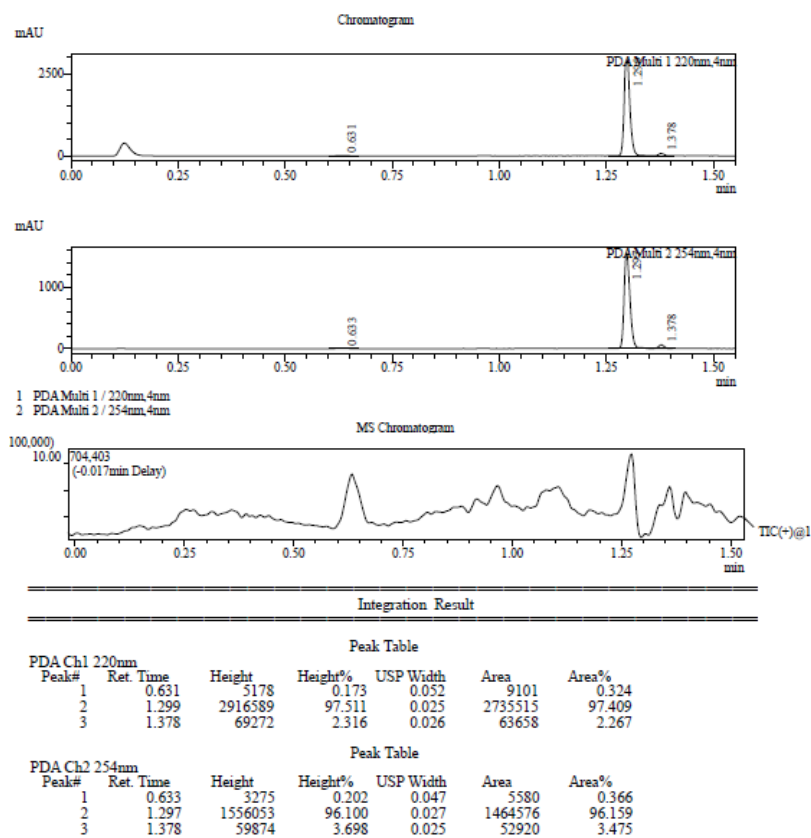

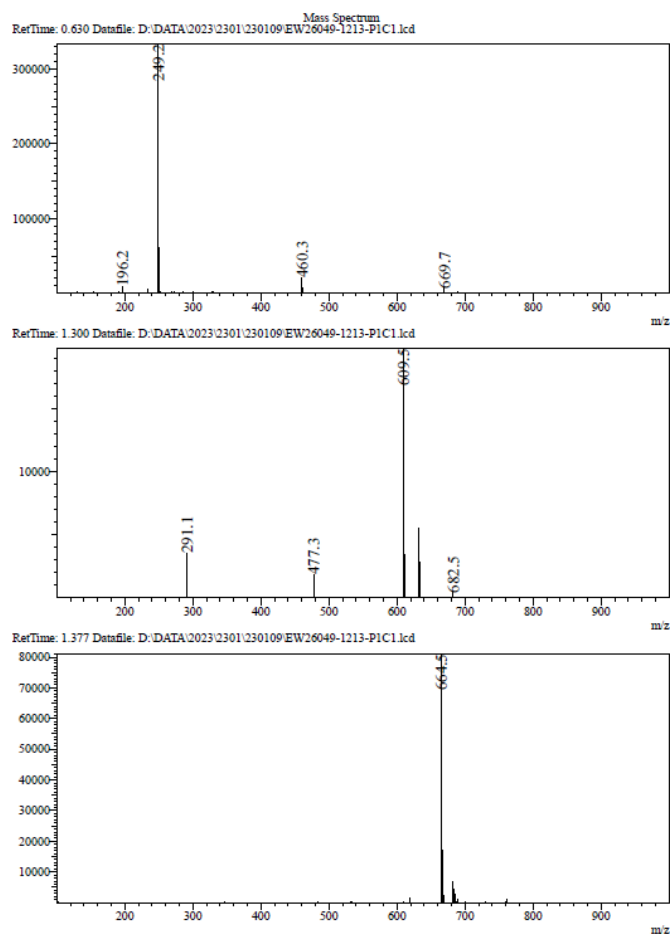

**$^1\text{H}$  NMR** [(2*R*,3*R*,4*S*,5*S*)-5-(4-Aminopyrrolo[2,1-*f*][1,2,4]triazin-7-yl)-3,4-bis[[tert-butyl(dimethyl)silyl]oxy]tetrahydrofuran-2-yl]methanol (**119**)

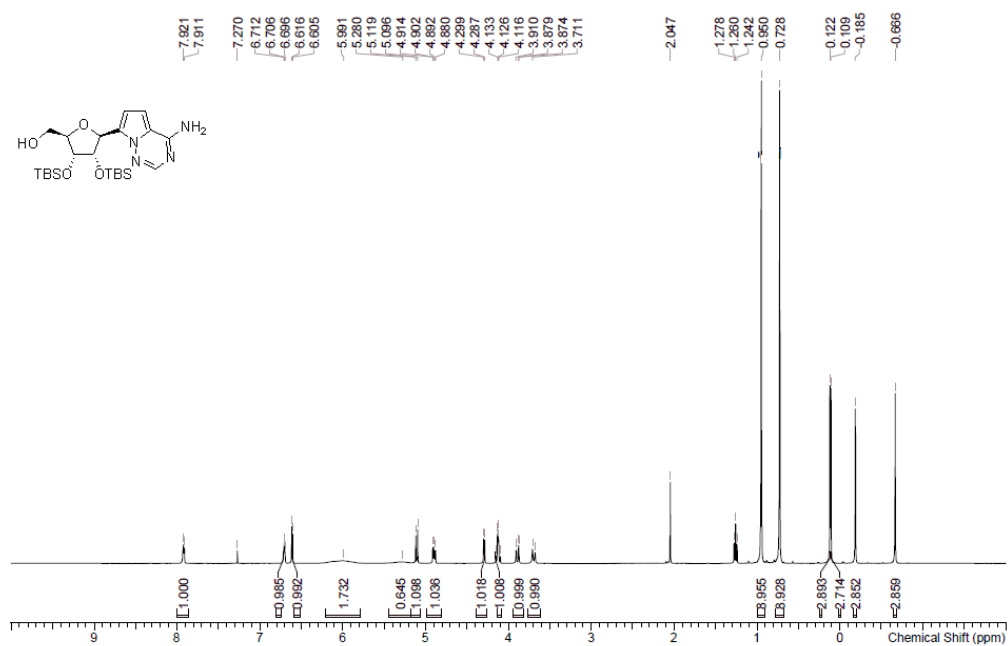

**LCMS [(2*R*,3*R*,4*S*,5*S*)-5-(4-Aminopyrrolo[2,1-*f*][1,2,4]triazin-7-yl) -3,4-bis[[tert-butyl(dimethyl)silyl]oxy]tetrahydrofuran-2-yl)methanol (119)**

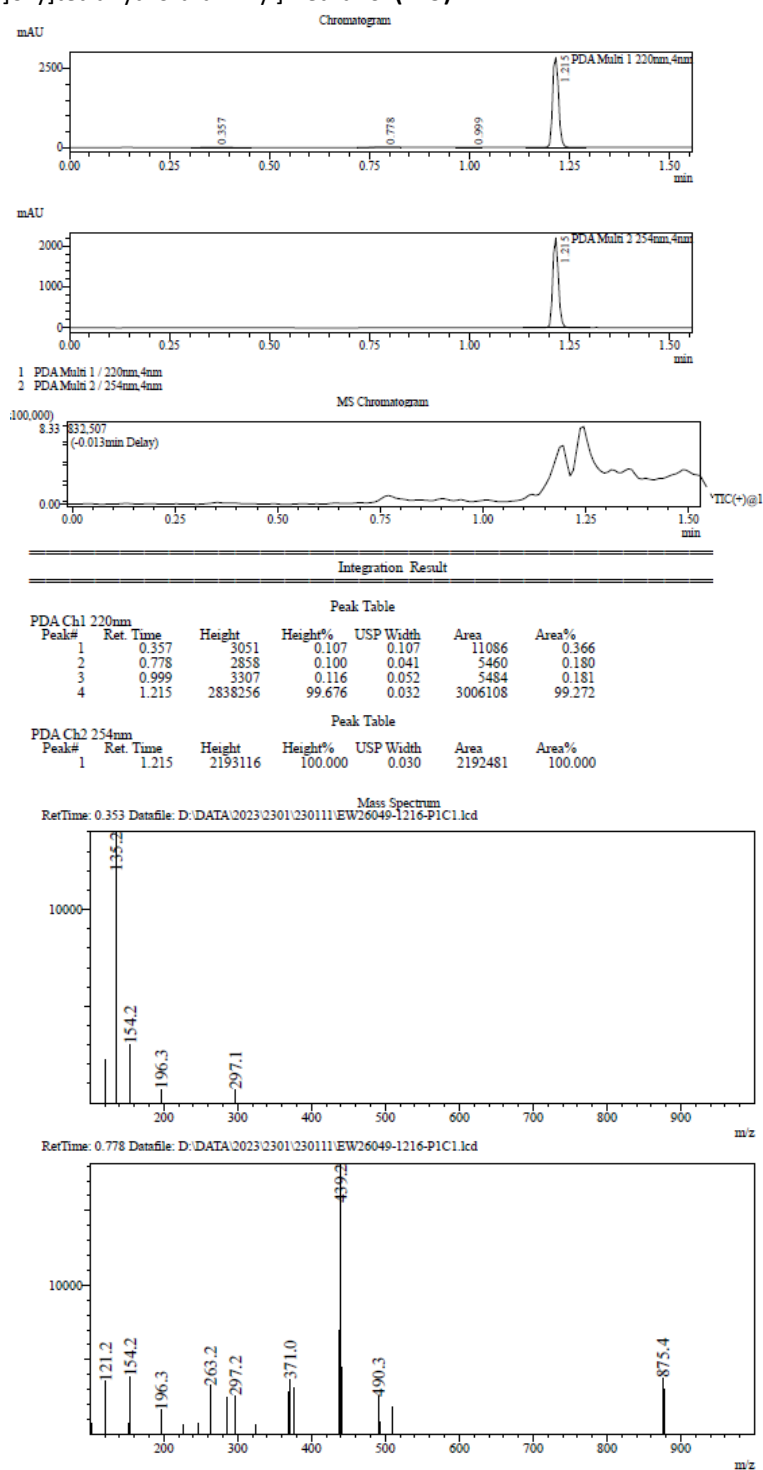

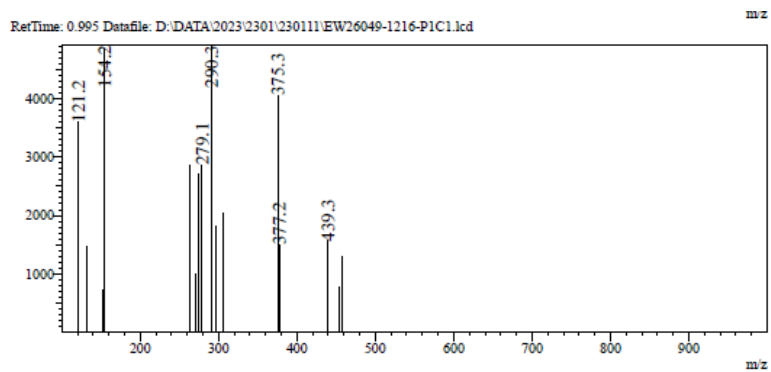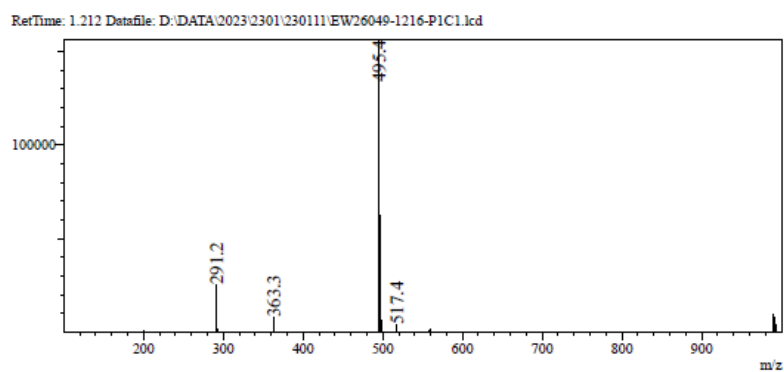

**<sup>1</sup>H NMR** [(2*R*,3*R*,4*S*,5*S*)-5-(4-Aminopyrrolo[2,1-*f*][1,2,4]triazin-7-yl)-3,4-bis [[tert-butyl(dimethyl)silyl]oxy]tetrahydrofuran-2-yl]methyl methanesulfonate (**120**)

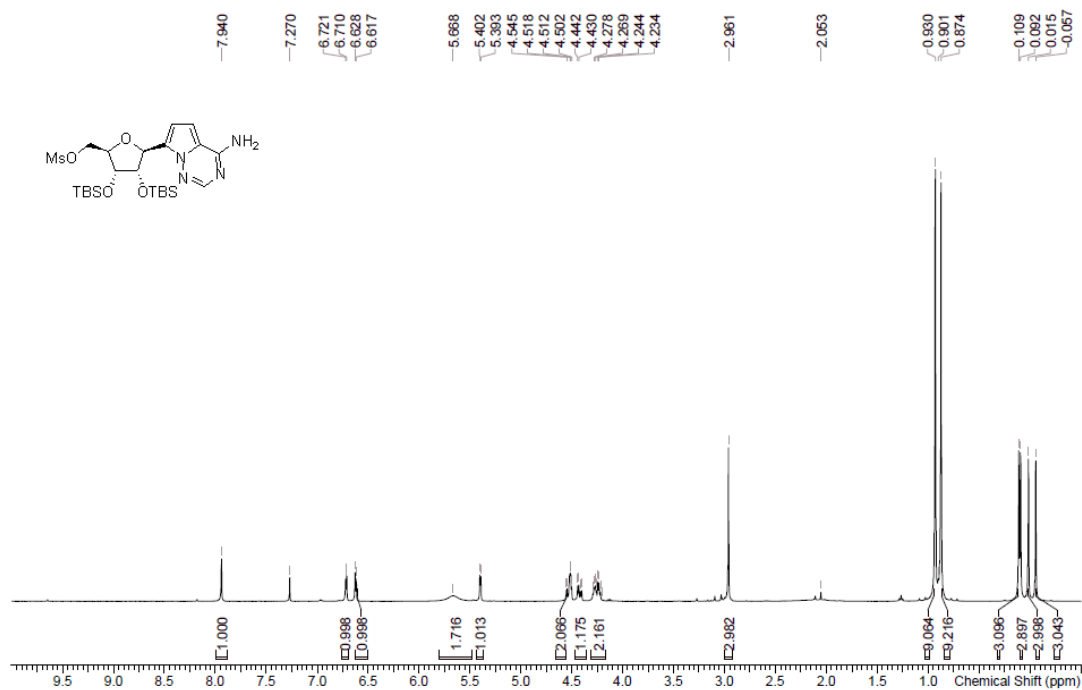

**LCMS [(2*R*,3*R*,4*S*,5*S*)-5-(4-Aminopyrrolo[2,1-*f*][1,2,4]triazin-7-yl)-3,4-bis [[tert-butyl(dimethyl)silyl]oxy]tetrahydrofuran-2-yl)methyl methanesulfonate (**120**)**

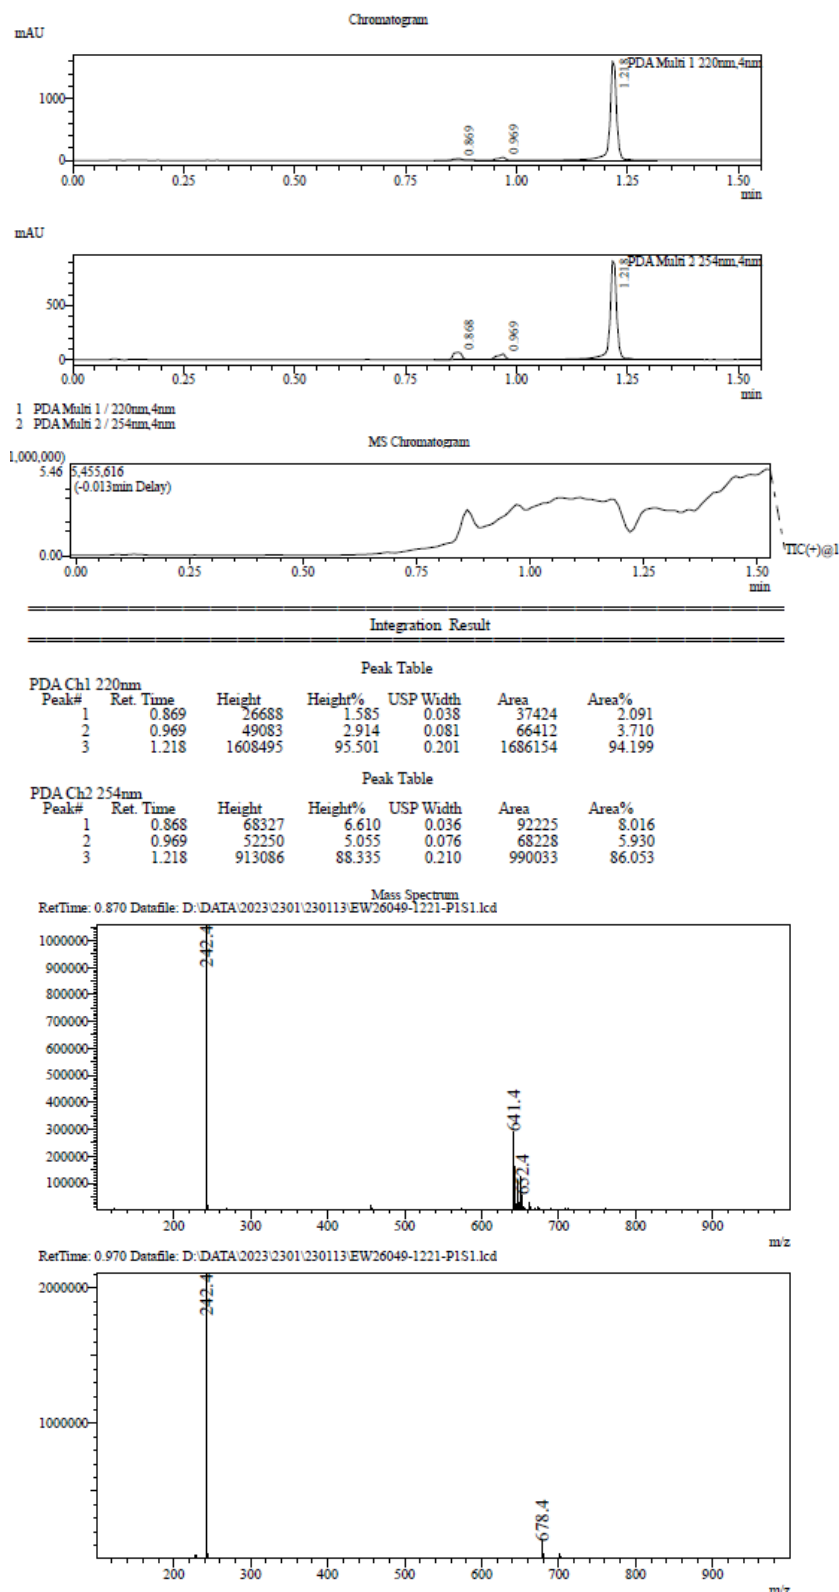



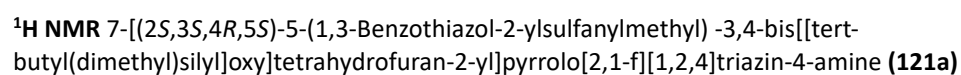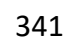

**LCMS 7-[(2S,3S,4R,5S)-5-(1,3-Benzothiazol-2-ylsulfanylmethyl)-3,4-bis[[tert-butyl(dimethyl)silyl]oxy]tetrahydrofuran-2-yl]pyrrolo[2,1-f][1,2,4]triazin-4-amine (121a)**

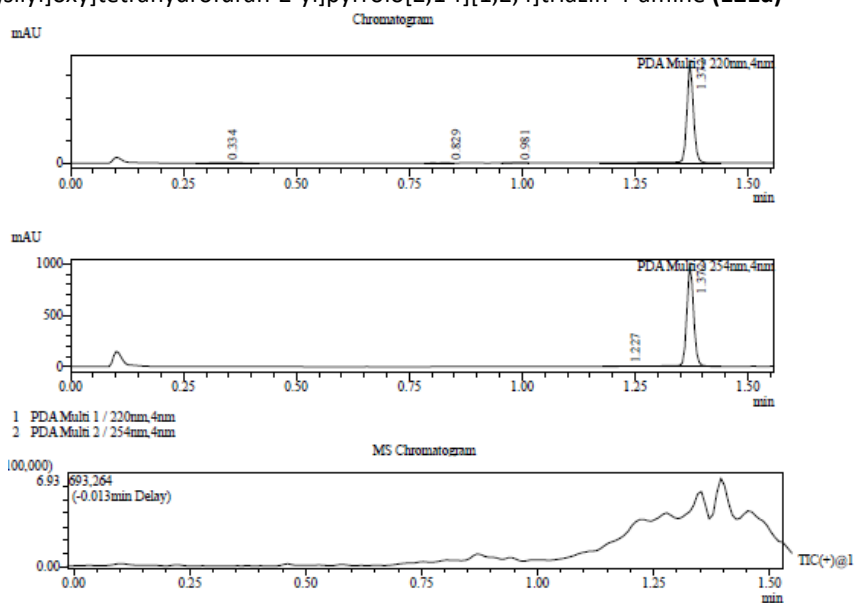

Integration Result

| Peak Table |           |         |         |           |         |        |
|------------|-----------|---------|---------|-----------|---------|--------|
| Peak#      | Ret. Time | Height  | Height% | USP Width | Area    | Area%  |
| 1          | 0.334     | 5086    | 0.217   | 0.102     | 18409   | 0.774  |
| 2          | 0.829     | 2309    | 0.099   | 0.277     | 5476    | 0.230  |
| 3          | 0.981     | 7994    | 0.341   | 0.034     | 9188    | 0.387  |
| 4          | 1.372     | 2325600 | 99.343  | 0.199     | 2343870 | 98.609 |

  

| Peak Table |           |        |         |           |         |        |
|------------|-----------|--------|---------|-----------|---------|--------|
| Peak#      | Ret. Time | Height | Height% | USP Width | Area    | Area%  |
| 1          | 1.227     | 2675   | 0.271   | 0.000     | 5723    | 0.540  |
| 2          | 1.372     | 984651 | 99.729  | 0.147     | 1053628 | 99.460 |

RefTime: 0.337 Datafile: D:\DATA\2023\2301\230116\EW26049-1227-P1C1.lcd

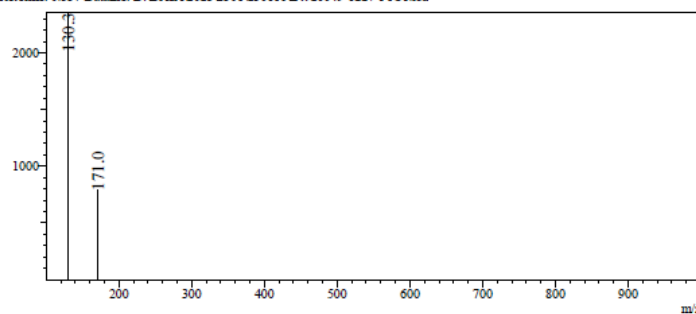

RefTime: 0.828 Datafile: D:\DATA\2023\2301\230116\EW26049-1227-P1C1.lcd

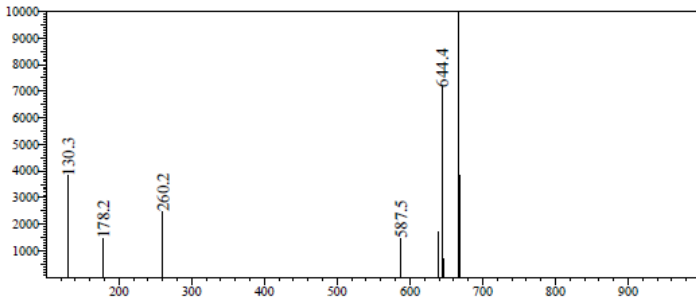

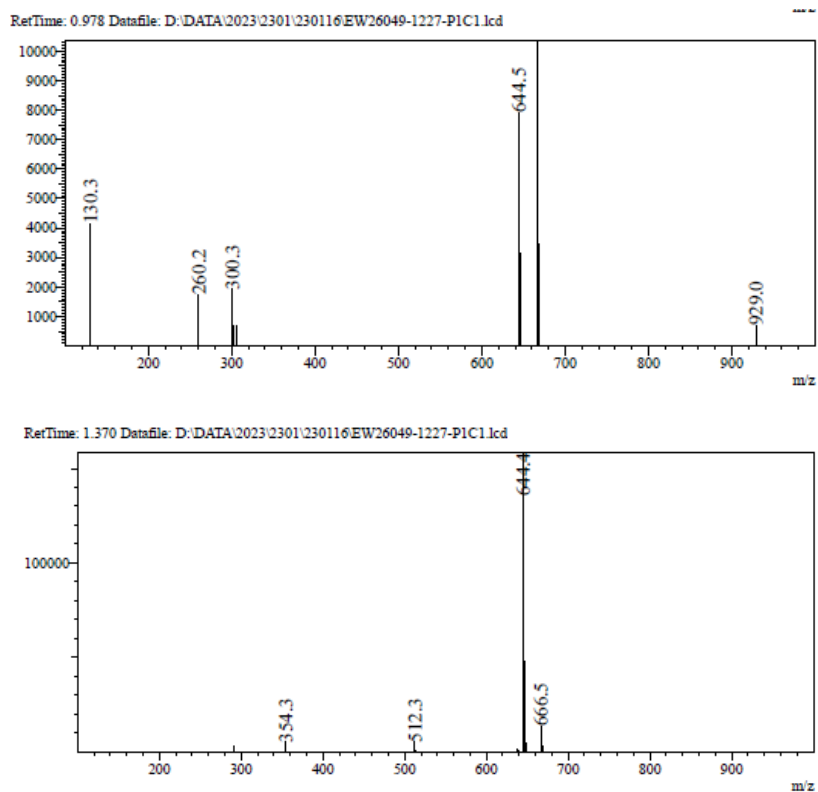

**<sup>1</sup>H NMR** 7-[(2S,3S,4R,5S)-3,4-Bis[[tert-butyl(dimethyl)silyl]oxy]-5-[(6-methyl-1,3-benzothiazol-2-yl)sulfanylmethyl]tetrahydrofuran-2-yl]pyrrolo[2,1-f][1,2,4]triazin-4-amine (**121b**)

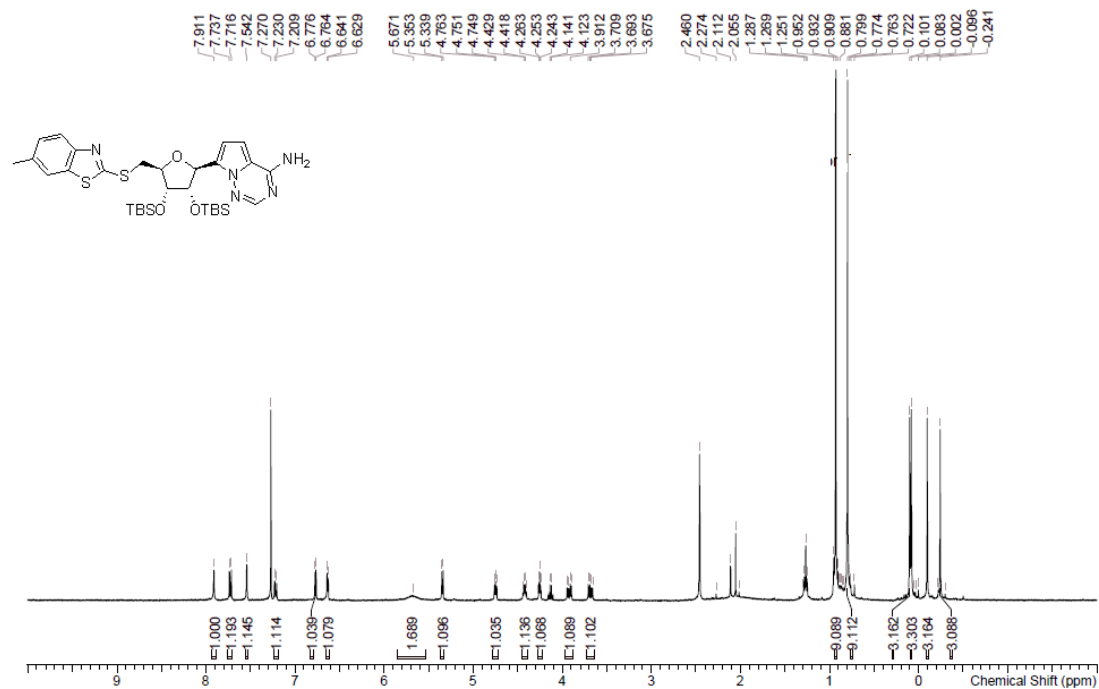

**LCMS 7-[(2S,3S,4R,5S)-3,4-Bis[[tert-butyl(dimethyl)silyl]oxy]-5-[(6-methyl-1,3-benzothiazol-2-yl)sulfanylmethyl]tetrahydrofuran-2-yl]pyrrolo[2,1-f][1,2,4]triazin-4-amine (121b)**

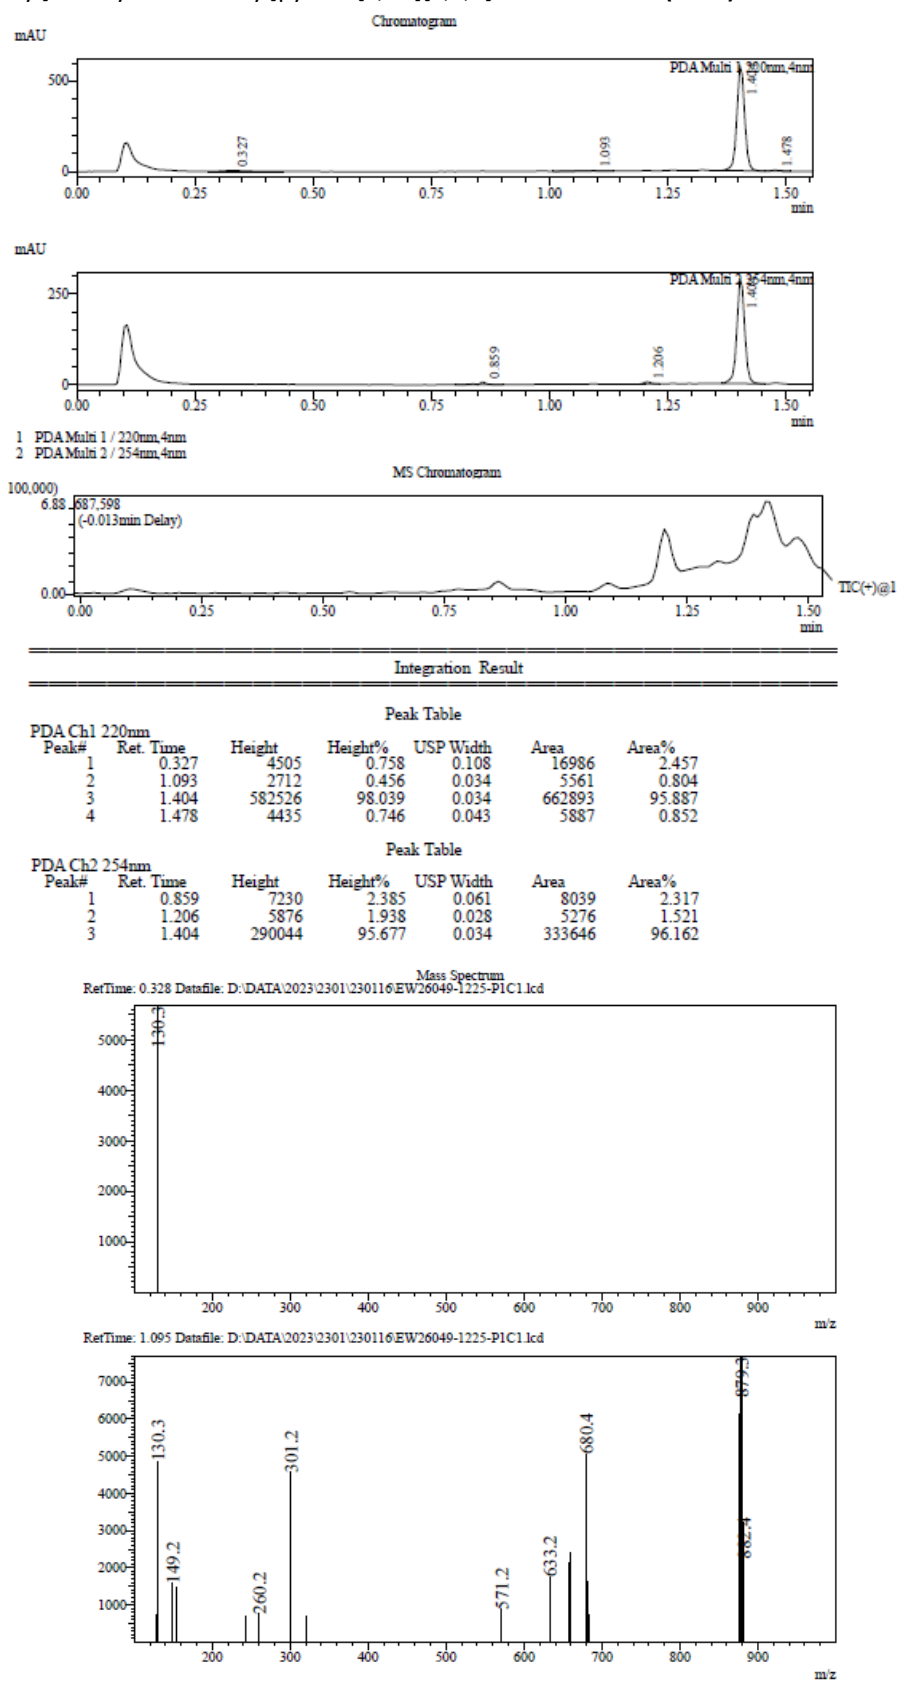

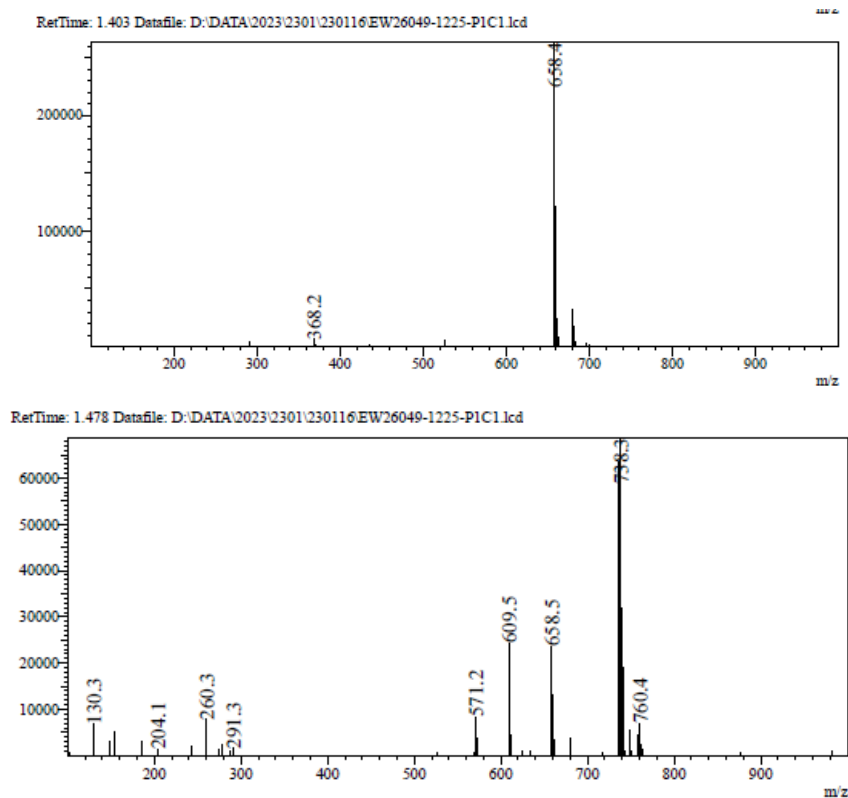

**<sup>1</sup>H NMR** 7-[(2S,3S,4R,5S)-3,4-Bis[[tert-butyl(dimethyl)silyl]oxy]-5-(2-naphthylsulfanylmethyl)tetrahydrofuran-2-yl]pyrrolo[2,1-f][1,2,4]triazin-4-amine (**121c**)

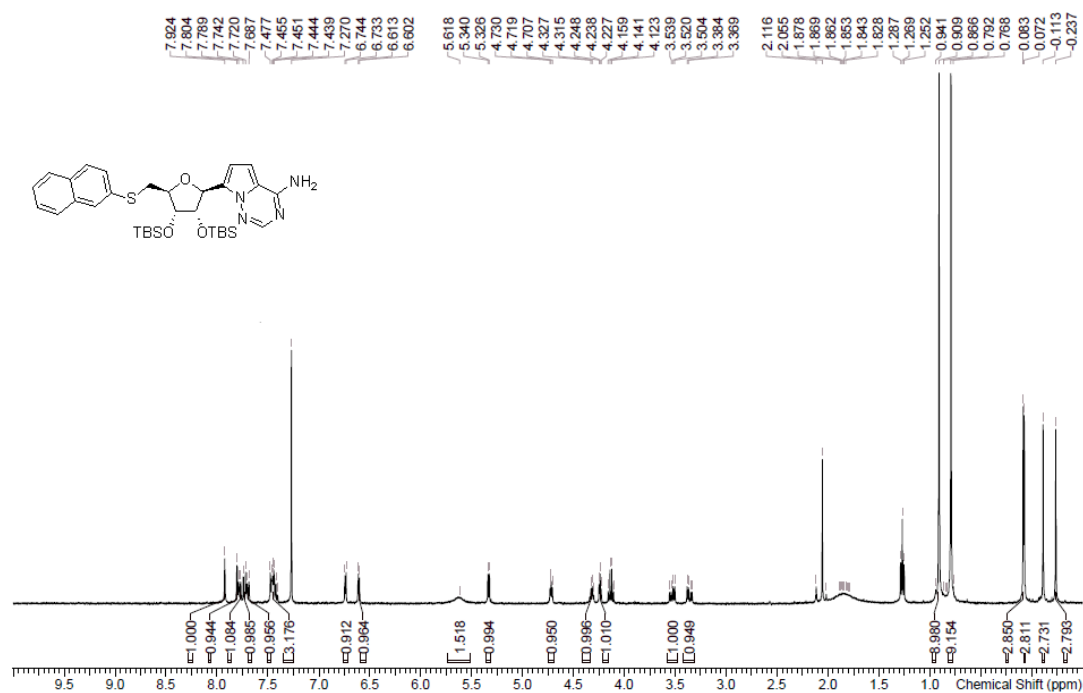

**LCMS** 7-[(2S,3S,4R,5S)-3,4-Bis[[tert-butyl(dimethyl)silyl]oxy]-5-(2-naphthylsulfanylmethyl)tetrahydrofuran-2-yl]pyrrolo[2,1-f][1,2,4]triazin-4-amine (**121c**)

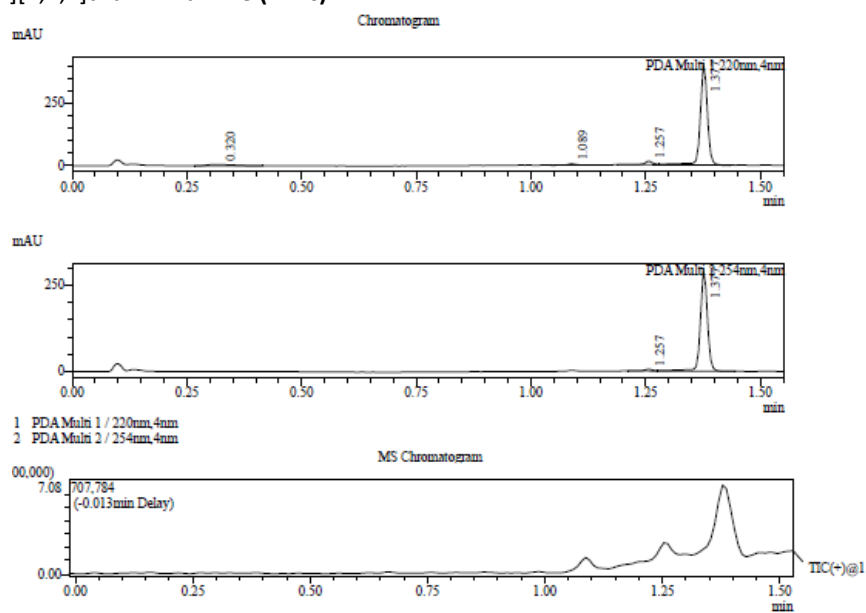

Integration Result

| Peak Table |           |        |         |           |        |        |
|------------|-----------|--------|---------|-----------|--------|--------|
| Peak#      | Ret. Time | Height | Height% | USP Width | Area   | Area%  |
| 1          | 0.320     | 4646   | 1.074   | 0.109     | 17982  | 3.727  |
| 2          | 1.089     | 5361   | 1.239   | 0.031     | 6016   | 1.247  |
| 3          | 1.257     | 14684  | 3.394   | 0.035     | 20943  | 4.341  |
| 4          | 1.377     | 407918 | 94.293  | 0.156     | 437546 | 90.686 |

| Peak Table |           |        |         |           |        |        |
|------------|-----------|--------|---------|-----------|--------|--------|
| Peak#      | Ret. Time | Height | Height% | USP Width | Area   | Area%  |
| 1          | 1.257     | 4944   | 1.661   | 0.038     | 6989   | 2.171  |
| 2          | 1.377     | 292657 | 98.339  | 0.139     | 314987 | 97.829 |

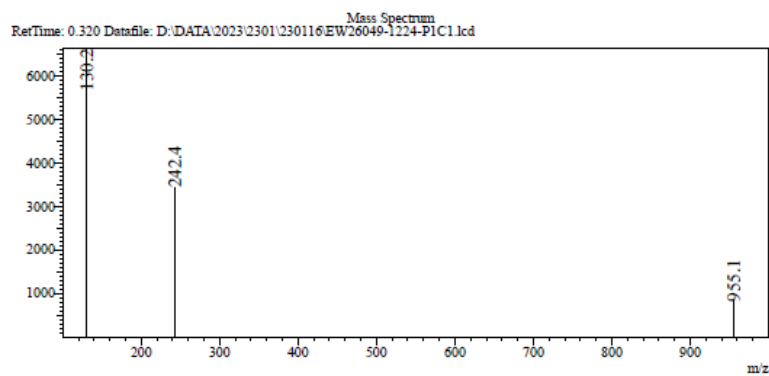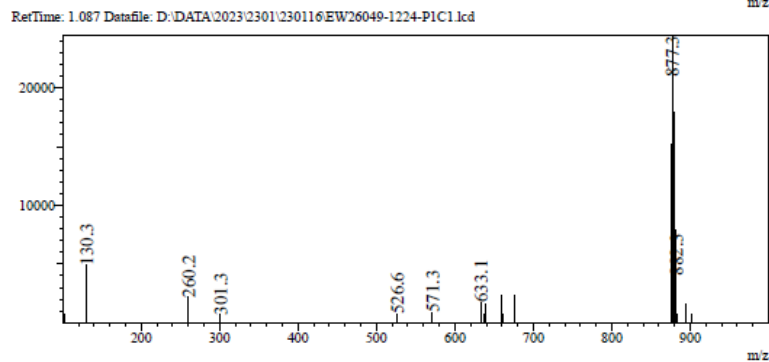

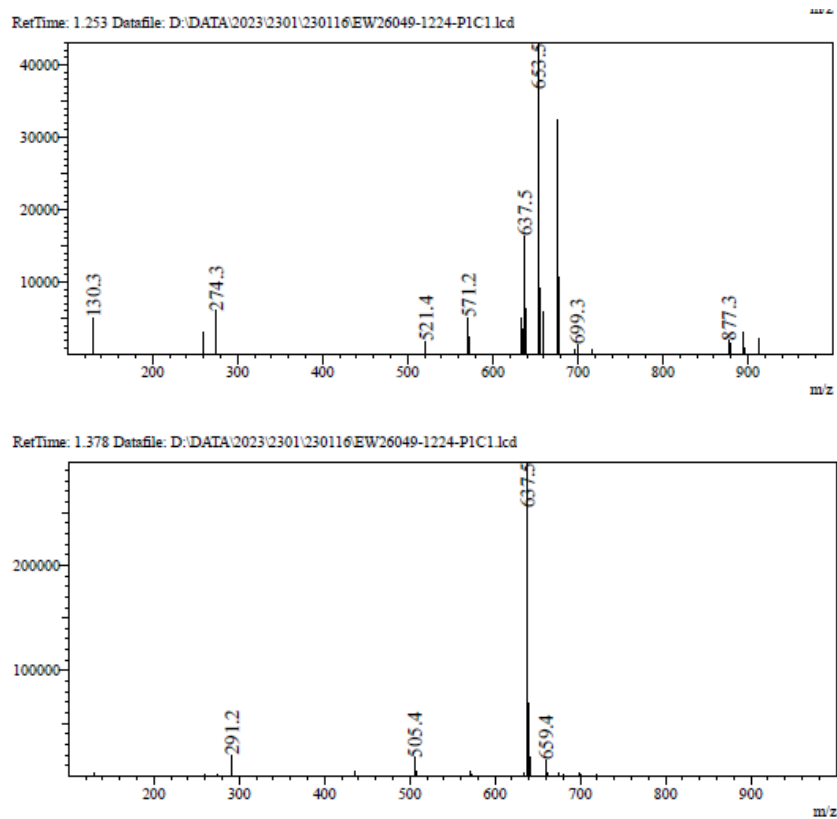

$^1\text{H}$  NMR 7-[(2*S*,3*S*,4*R*,5*S*)-3,4-Bis[[*tert*-butyl(dimethyl)silyl]oxy]- 5-(2-quinolylsulfanylmethyl) tetrahydrofuran-2-yl]pyrrolo[2,1-*f*][1,2,4]triazin-4- amine (**121d**)

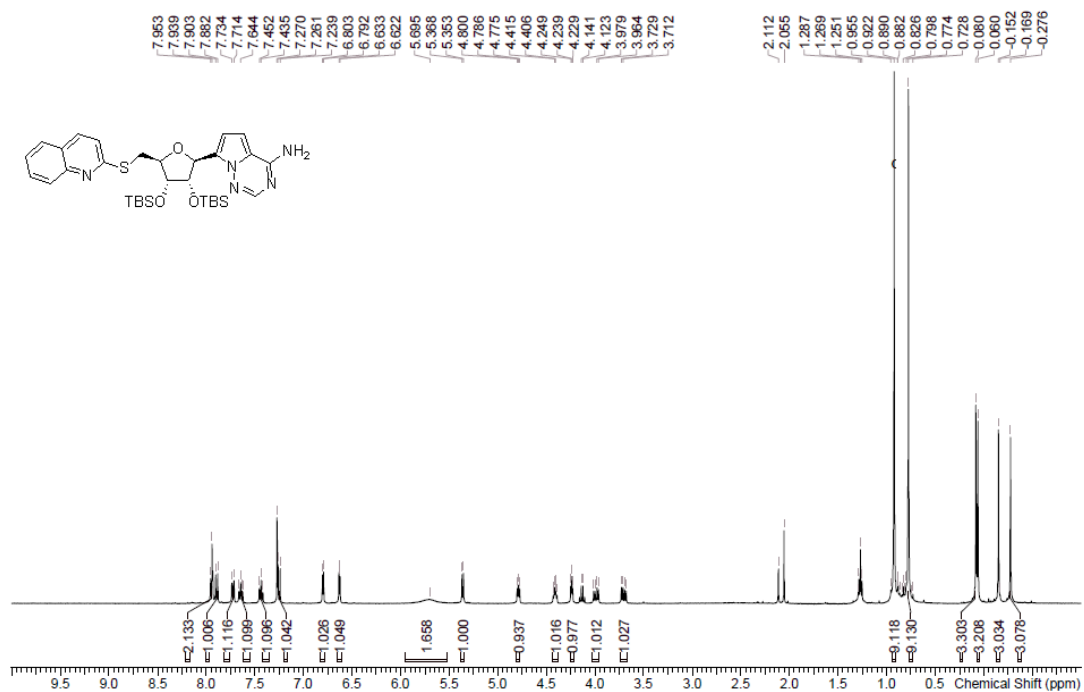

**LCMS 7-[(2S,3S,4R,5S)-3,4-Bis[[tert-butyl(dimethyl)silyl]oxy]- 5-(2-quinolylsulfanylmethyl) tetrahydrofuran-2-yl]pyrrolo[2,1-f][1,2,4]triazin-4- amine (121d)**

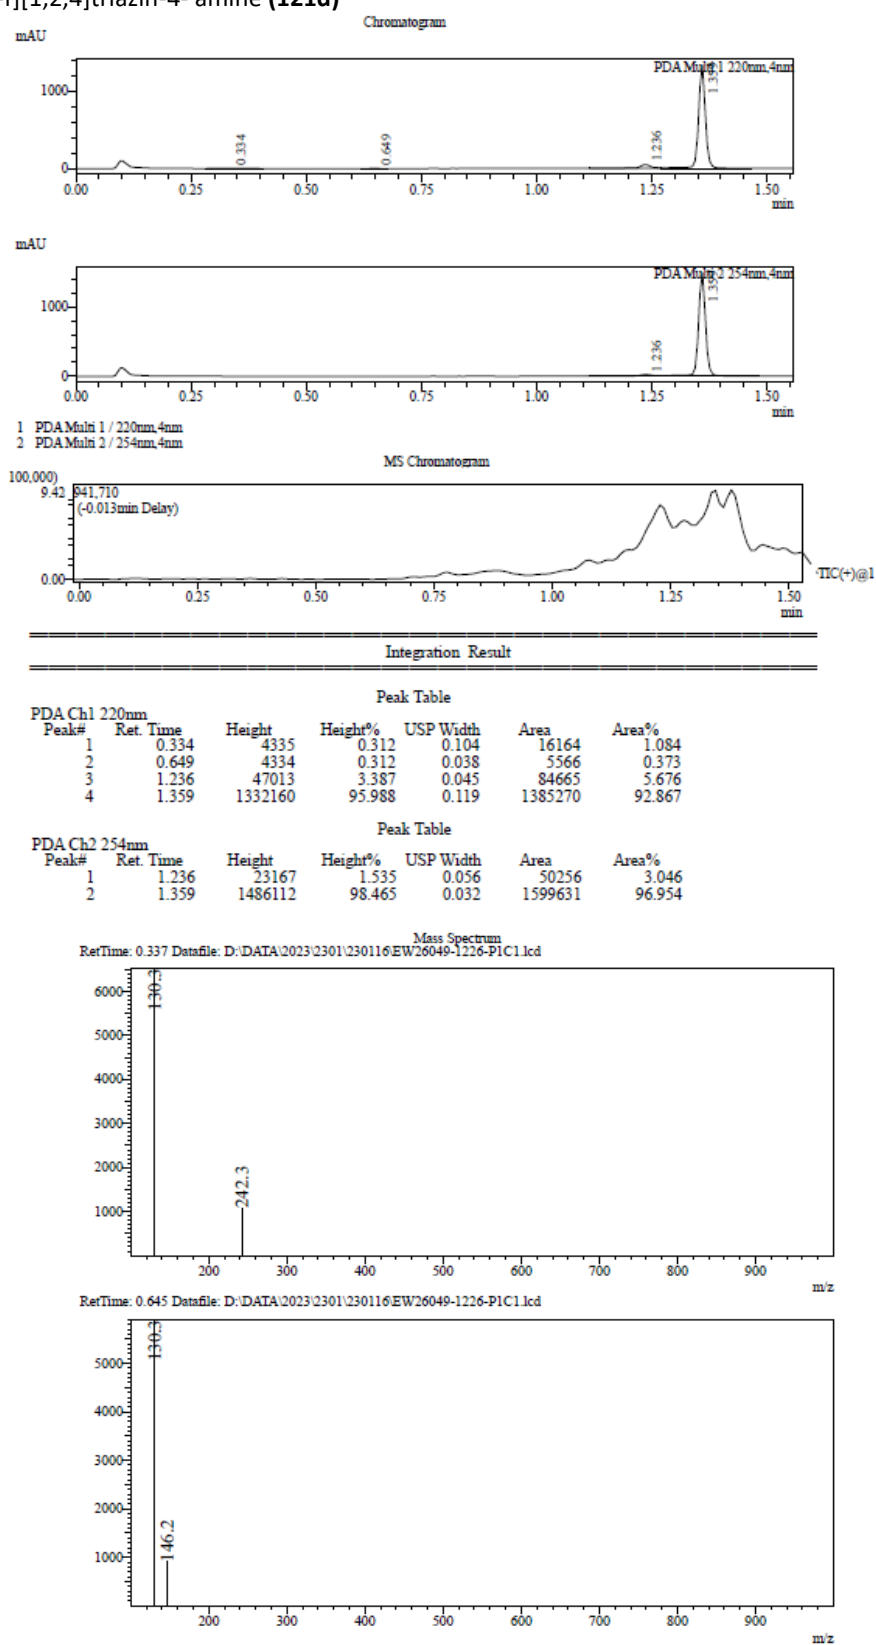



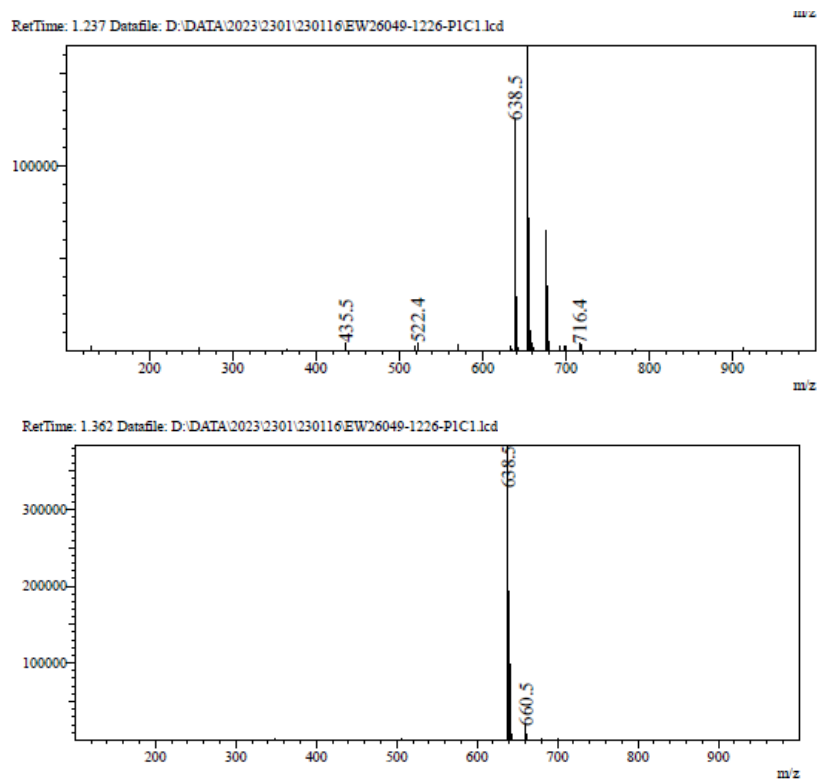

**$^1\text{H}$  NMR** (2*S*,3*R*,4*S*,5*S*)-2-(4-Aminopyrrolo[2,1-*f*][1,2,4]triazin-7-yl)-5-(1,3-benzothiazol-2-ylsulfanylmethyl)tetrahydrofuran-3,4-diol (**35**)

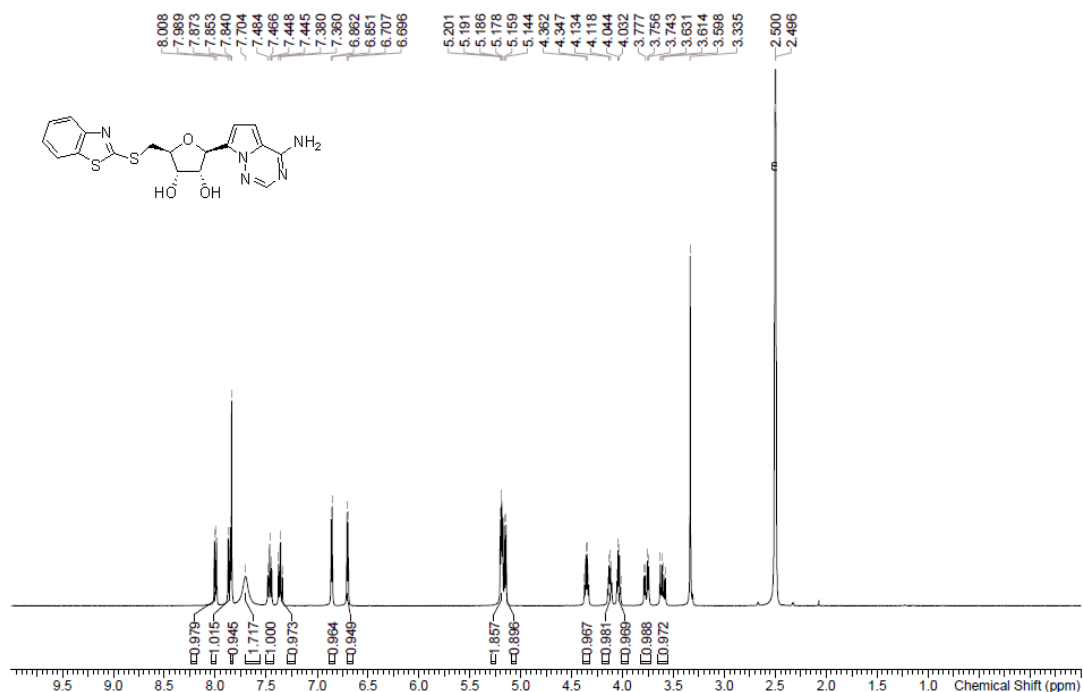

**<sup>13</sup>C NMR (2*S*,3*R*,4*S*,5*S*)-2-(4-Aminopyrrolo[2,1-*f*][1,2,4]triazin-7-yl)-5-(1,3-benzothiazol-2-ylsulfanylmethyl)tetrahydrofuran-3,4-diol (**35**)**

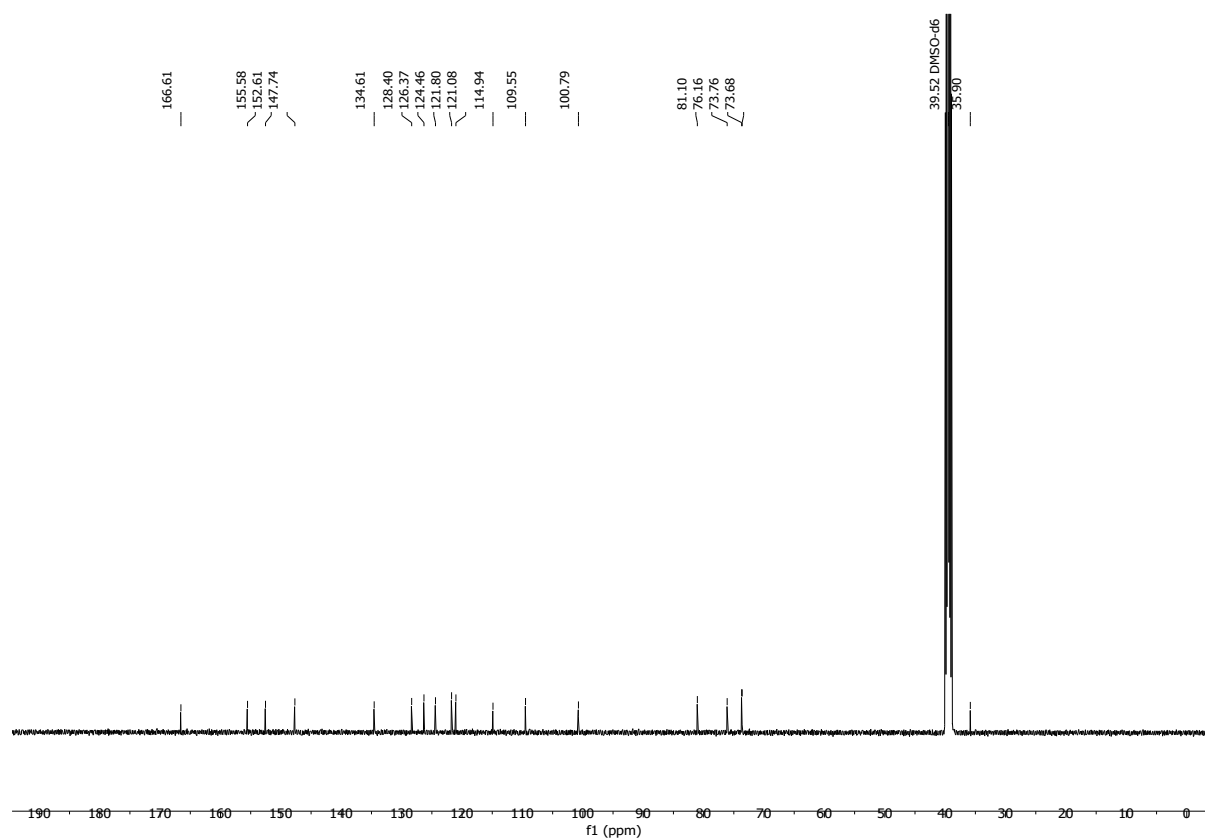

**HPLC (2*S*,3*R*,4*S*,5*S*)-2-(4-Aminopyrrolo[2,1-*f*][1,2,4]triazin-7-yl)-5-(1,3-benzothiazol-2-ylsulfanylmethyl)tetrahydrofuran-3,4-diol (**35**)**

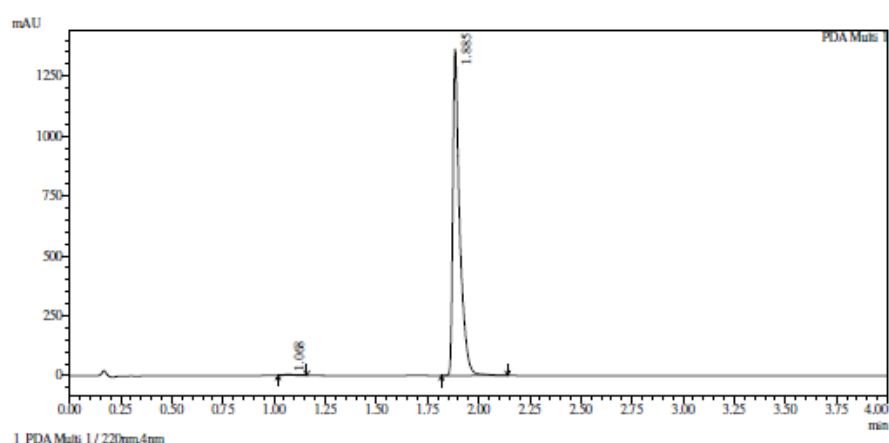

Integration result

| PeakTable     |       |           |          |            |         |         |
|---------------|-------|-----------|----------|------------|---------|---------|
| PDA Ch1 220nm | Peak# | Ret. Time | USPWidth | Resolution | Height  | Area    |
|               | 1     | 1.068     | 0.075    | 0.000      | 5252    | 15723   |
|               | 2     | 1.885     | 0.056    | 12.449     | 1362095 | 3188169 |
|               | Total |           |          |            | 1367347 | 3203892 |
|               |       |           |          |            |         | Area %  |
|               |       |           |          |            |         | 0.491   |
|               |       |           |          |            |         | 99.509  |
|               |       |           |          |            |         | 100.000 |

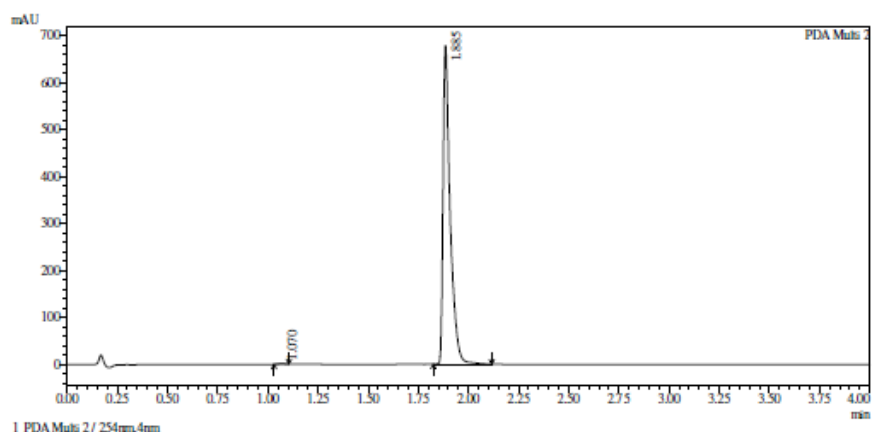

1 PDA Multi 2 / 254nm,4mm

#### Integration result

| PeakTable |           |           |            |        |         |         |
|-----------|-----------|-----------|------------|--------|---------|---------|
| Peak#     | Ret. Time | USP Width | Resolution | Height | Area    | Area %  |
| 1         | 1.070     | 0.059     | 0.000      | 996    | 2263    | 0.135   |
| 2         | 1.885     | 0.060     | 13.713     | 679112 | 1669071 | 99.865  |
| Total     |           |           |            | 680109 | 1671335 | 100.000 |

**HRMS** (2*S*,3*R*,4*S*,5*S*)-2-(4-Aminopyrrolo[2,1-*f*][1,2,4]triazin-7-yl)-5- (1,3-benzothiazol-2-ylsulfanylmethyl)tetrahydrofuran-3,4-diol (**35**)

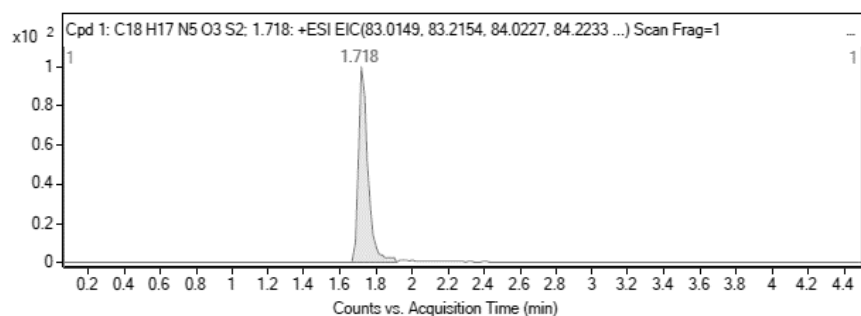

MS Zoomed Spectrum

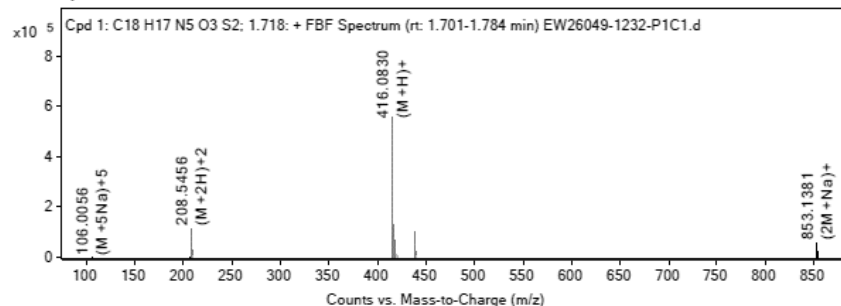

MS Spectrum Peak List

| Obs. m/z | Charge | Abund     | Ion/Isotope |
|----------|--------|-----------|-------------|
| 208.5456 | 2      | 116103.53 | (M+2H)+2    |
| 209.0467 | 2      | 26254.92  | (M+2H)+2    |

|          |   |           |          |
|----------|---|-----------|----------|
| 209.5448 | 2 | 14248.66  | (M+2H)+2 |
| 416.0830 | 1 | 559536.25 | (M+H)+   |
| 417.0849 | 1 | 128231.88 | (M+H)+   |
| 418.0803 | 1 | 63988.23  | (M+H)+   |
| 438.0639 | 1 | 101660.52 | (M+Na)+  |
| 439.0662 | 1 | 24114.88  | (M+Na)+  |
| 853.1381 | 1 | 57645.03  | (2M+Na)+ |
| 854.1398 | 1 | 25484.41  | (2M+Na)+ |

MS Zoomed Spectrum

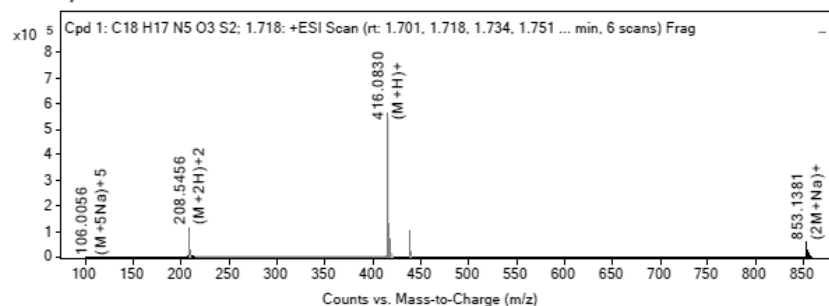

MS Spectrum Peak List

| Obs. m/z | Charge | Abund     | Ion/Isotope | Tgt Mass Error (ppm) |
|----------|--------|-----------|-------------|----------------------|
| 208.5456 | 2      | 116103.53 | (M+2H)+2    | 1.32                 |
| 209.0467 | 2      | 26254.92  | (M+2H)+2    | 2.3                  |
| 209.5448 | 2      | 14248.66  | (M+2H)+2    | 1.32                 |
| 416.0830 | 1      | 559536.25 | (M+H)+      | 3.81                 |
| 417.0849 | 1      | 128231.88 | (M+H)+      | 5.48                 |
| 418.0803 | 1      | 63988.23  | (M+H)+      | 5.87                 |
| 438.0639 | 1      | 101660.52 | (M+Na)+     | 5.35                 |
| 439.0662 | 1      | 24114.88  | (M+Na)+     | 6.67                 |
| 853.1381 | 1      | 57645.03  | (2M+Na)+    | 6.61                 |
| 854.1398 | 1      | 25484.41  | (2M+Na)+    | 7.73                 |

--- End Of Report ---

**<sup>1</sup>H NMR** (2S,3R,4S,5S)-2-(4-Aminopyrrolo[2,1-f][1,2,4]triazin-7-yl)-5-[(6-methyl-1,3-benzothiazol-2-yl)sulfanylmethyl]tetrahydrofuran-3,4-diol (**36**)

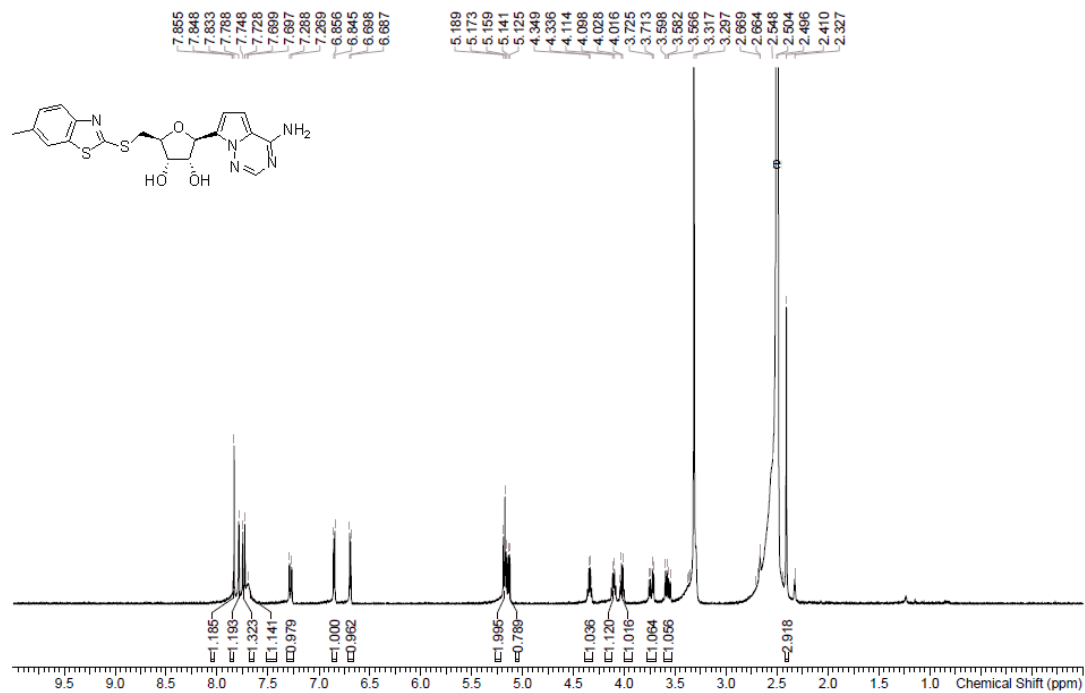

**HPLC (2S,3R,4S,5S)-2-(4-Aminopyrrolo[2,1-f][1,2,4]triazin-7-yl)-5- [(6-methyl-1,3-benzothiazol-2-yl)sulfanylmethyl]tetrahydrofuran-3,4-diol (36)**

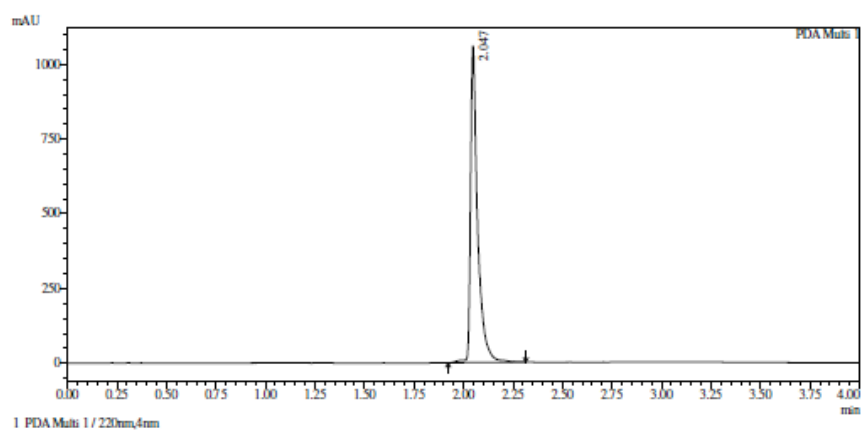

Integration result

| PeakTable |           |           |            |         |         |         |
|-----------|-----------|-----------|------------|---------|---------|---------|
| Peak#     | Ret. Time | USP Width | Resolution | Height  | Area    | Area %  |
| 1         | 2.047     | 0.057     | 0.000      | 1060182 | 2646473 | 100.000 |
| Total     |           |           |            | 1060182 | 2646473 | 100.000 |

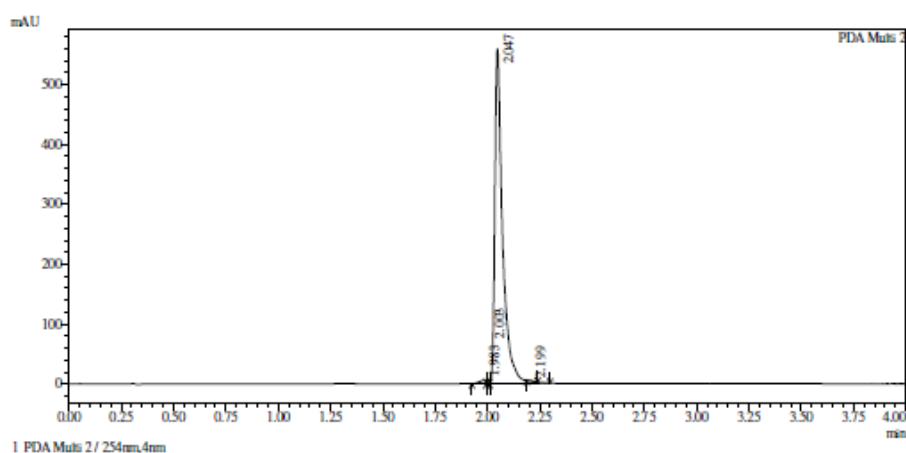

#### Integration result

| PeakTable     |           |          |            |        |         |         |
|---------------|-----------|----------|------------|--------|---------|---------|
| PDA Ch2 254nm |           |          |            |        |         |         |
| Peak#         | Ret. Time | USPWidth | Resolution | Height | Area    | Area %  |
| 1             | 1.983     | 0.449    | 0.000      | 5882   | 12794   | 0.874   |
| 2             | 2.003     | 0.000    | 0.000      | 6154   | 5875    | 0.401   |
| 3             | 2.047     | 0.060    | 0.000      | 559244 | 1444709 | 98.655  |
| 4             | 2.199     | 0.043    | 2.956      | 644    | 1021    | 0.070   |
| Total         |           |          |            | 571924 | 1464399 | 100.000 |

**HRMS** (2*S*,3*R*,4*S*,5*S*)-2-(4-Aminopyrrolo[2,1-*f*][1,2,4]triazin-7-yl)-5- [(6-methyl-1,3-benzothiazol-2-yl)sulfanylmethyl]tetrahydrofuran-3,4-diol (**36**)

#### Compound Table

| Label                          | Tgt Score | Mass Error (ppm) | Tgt Formula      | Obs. RT | Ref. Mass | Obs. Mass |
|--------------------------------|-----------|------------------|------------------|---------|-----------|-----------|
| Cpd 1: C19 H19 N5 O3 S2; 1.859 | 97.39     | 0.46             | C19 H19 N5 O3 S2 | 1.859   | 429.0929  | 429.0931  |

| Obs. <i>m/z</i> | Obs. RT | Obs. Mass | Tgt Formula      | Tgt Mass | Tgt Mass Error (ppm) | Find Cpd's Algorithm |
|-----------------|---------|-----------|------------------|----------|----------------------|----------------------|
| 430.1006        | 1.859   | 429.0931  | C19 H19 N5 O3 S2 | 429.0929 | 0.46                 | Find by Formula      |

#### Compound Chromatograms

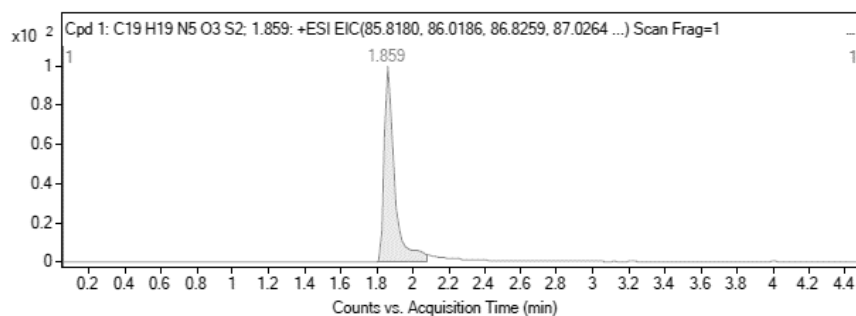

#### MS Zoomed Spectrum

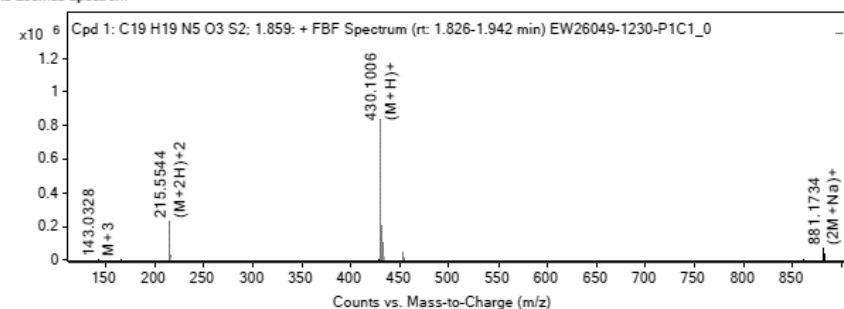

#### MS Spectrum Peak List

| Obs. <i>m/z</i> | Charge | Abund     | Ion/Isotope |
|-----------------|--------|-----------|-------------|
| 215.5544        | 2      | 228431.22 | (M+2H)+2    |

|          |   |          |                      |
|----------|---|----------|----------------------|
| 216.0553 | 2 | 55924.73 | (M+2H) <sup>2+</sup> |
| 216.5535 | 2 | 28726.35 | (M+2H) <sup>2+</sup> |
| 430.1006 | 1 | 83494.69 | (M+H) <sup>+</sup>   |
| 431.1025 | 1 | 20448.72 | (M+H) <sup>+</sup>   |
| 432.098  | 1 | 99319.41 | (M+H) <sup>+</sup>   |
| 452.0811 | 1 | 48844.35 | (M+Na) <sup>+</sup>  |
| 453.0836 | 1 | 12057.81 | (M+Na) <sup>+</sup>  |
| 881.1734 | 1 | 69624.05 | (2M+Na) <sup>+</sup> |
| 882.1762 | 1 | 33133.84 | (2M+Na) <sup>+</sup> |

MS Zoomed Spectrum

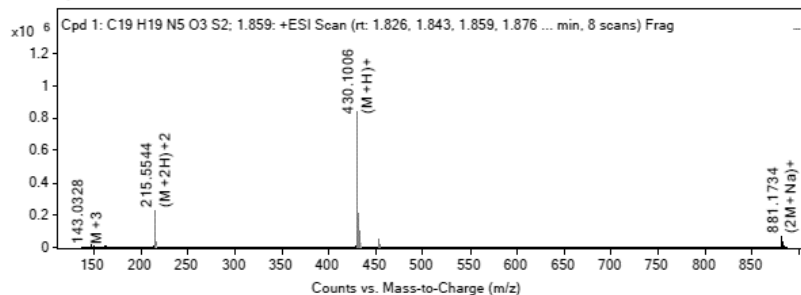

MS Spectrum Peak List

| Obs. m/z | Charge | Abund     | Ion/Isotope          | Tgt Mass Error (ppm) |
|----------|--------|-----------|----------------------|----------------------|
| 215.5544 | 2      | 228431.22 | (M+2H) <sup>2+</sup> | -3.06                |
| 216.0553 | 2      | 55924.73  | (M+2H) <sup>2+</sup> | -2.03                |
| 216.5535 | 2      | 28726.35  | (M+2H) <sup>2+</sup> | -2.75                |
| 430.1006 | 1      | 83494.69  | (M+H) <sup>+</sup>   | -0.81                |
| 431.1025 | 1      | 20448.72  | (M+H) <sup>+</sup>   | 0.87                 |
| 432.098  | 1      | 99319.41  | (M+H) <sup>+</sup>   | 1.33                 |
| 452.0811 | 1      | 48844.35  | (M+Na) <sup>+</sup>  | 2.35                 |
| 453.0836 | 1      | 12057.81  | (M+Na) <sup>+</sup>  | 2.73                 |
| 881.1734 | 1      | 69624.05  | (2M+Na) <sup>+</sup> | 1.91                 |
| 882.1762 | 1      | 33133.84  | (2M+Na) <sup>+</sup> | 1.69                 |

— End Of Report —

<sup>1</sup>H NMR (2S,3R,4S,5S)-2-(4-Aminopyrrolo[2,1-f][1,2,4]triazin-7-yl)- 5-(2-naphthylsulfanylmethyl) tetrahydrofuran-3,4-diol (**37**)

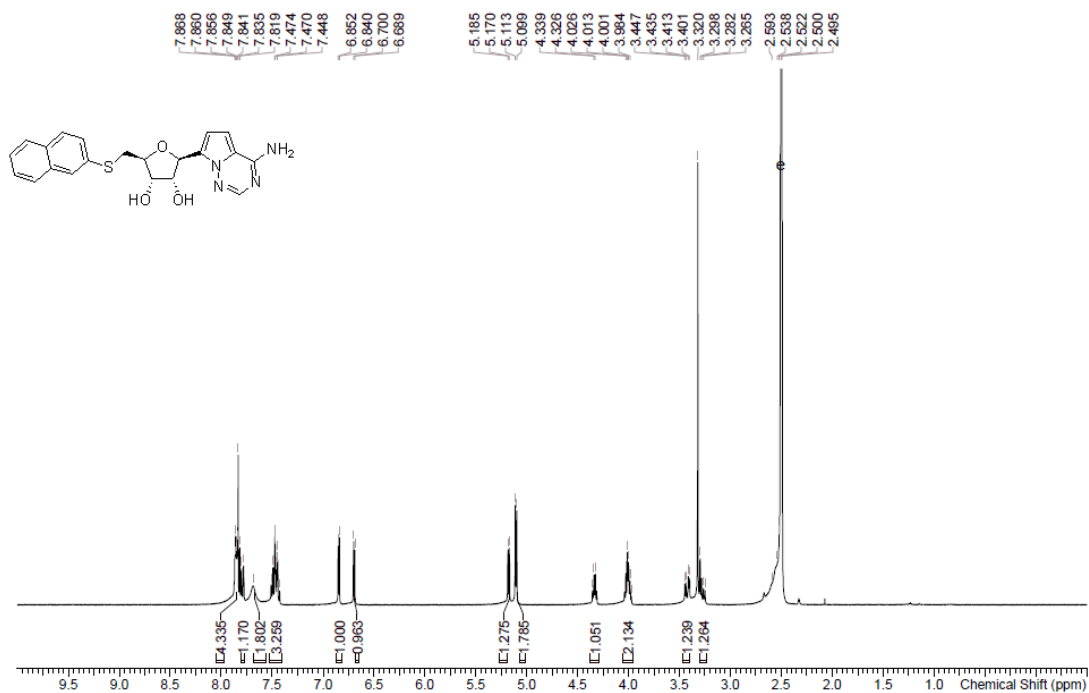

**HPLC** (2*S*,3*R*,4*S*,5*S*)-2-(4-Aminopyrrolo[2,1-*f*][1,2,4]triazin-7-yl)- 5-(2-naphthylsulfanylmethyl)tetrahydrofuran-3,4-diol (**37**)

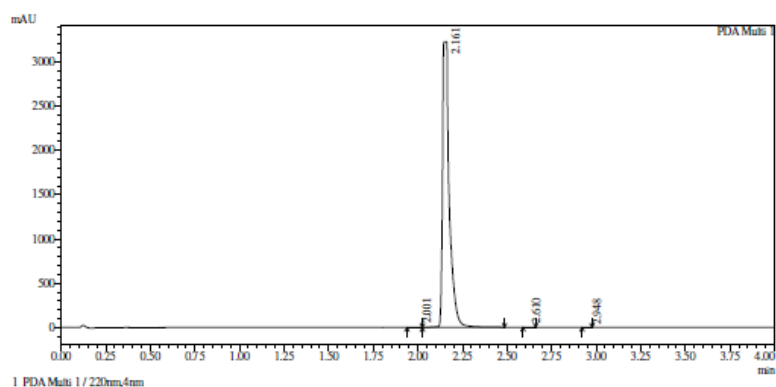

Integration result

| PeakTable     |           |          |            |         |         |         |
|---------------|-----------|----------|------------|---------|---------|---------|
| PDA Ch1 220nm |           |          |            |         |         |         |
| Peak#         | Ret. Time | USPWidth | Resolution | Height  | Area    | Area %  |
| 1             | 2.001     | 0.103    | 0.000      | 1210    | 3918    | 0.045   |
| 2             | 2.161     | 0.050    | 2.106      | 3225123 | 8687268 | 99.921  |
| 3             | 2.610     | 0.052    | 8.854      | 889     | 1692    | 0.019   |
| 4             | 2.948     | 0.050    | 6.654      | 702     | 1232    | 0.014   |
| Total         |           |          |            | 3227925 | 8694109 | 100.000 |

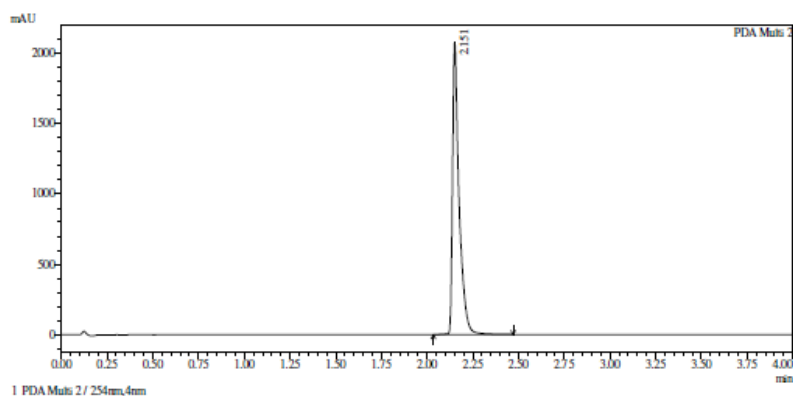

Integration result

| PeakTable     |           |          |            |         |         |         |
|---------------|-----------|----------|------------|---------|---------|---------|
| PDA Ch2 254nm |           |          |            |         |         |         |
| Peak#         | Ret. Time | USPWidth | Resolution | Height  | Area    | Area %  |
| 1             | 2.151     | 0.060    | 0.000      | 2076332 | 5202085 | 100.000 |
| Total         |           |          |            | 2076332 | 5202085 | 100.000 |



**HRMS** (2*S*,3*R*,4*S*,5*S*)-2-(4-Aminopyrrolo[2,1-*f*][1,2,4]triazin-7-yl)- 5-(2-naphthylsulfanylmethyl)tetrahydrofuran-3,4-diol (**37**)

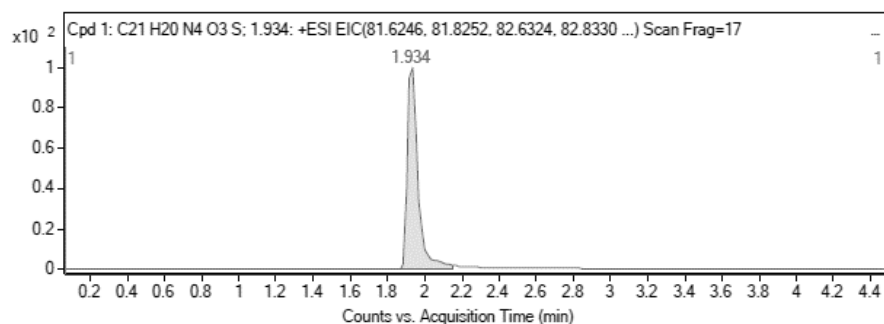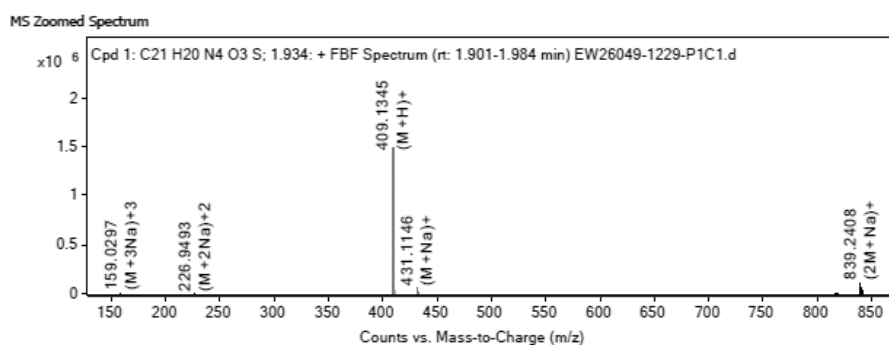

MS Spectrum Peak List

| Obs. m/z | Charge | Abund      | Ion/Isotope |
|----------|--------|------------|-------------|
| 409.1345 | 1      | 1475529.13 | (M+H)+      |
| 410.1366 | 1      | 389048.5   | (M+H)+      |

|          |   |           |          |
|----------|---|-----------|----------|
| 411.1338 | 1 | 117840.38 | (M+H)+   |
| 431.1146 | 1 | 57345.16  | (M+Na)+  |
| 432.1174 | 1 | 14351.31  | (M+Na)+  |
| 816.2443 | 1 | 3766.16   | 2M+      |
| 839.2408 | 1 | 110424.12 | (2M+Na)+ |
| 840.2431 | 1 | 56908.58  | (2M+Na)+ |
| 841.2425 | 1 | 24947.69  | (2M+Na)+ |
| 842.2418 | 1 | 8018.12   | (2M+Na)+ |

MS Zoomed Spectrum

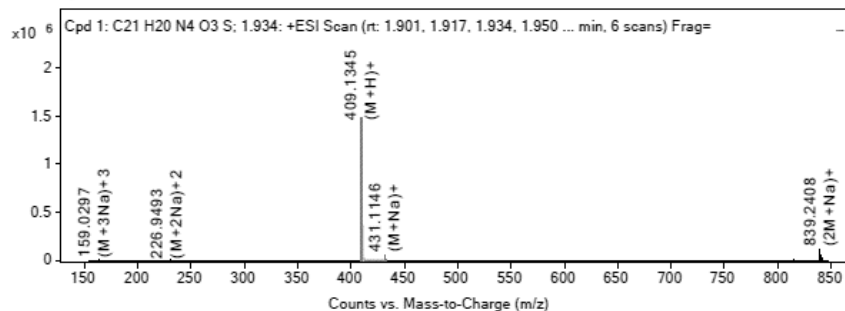

MS Spectrum Peak List

| Obs. m/z | Charge | Abund      | Ion/Isotope | Tgt Mass Error (ppm) |
|----------|--------|------------|-------------|----------------------|
| 409.1345 | 1      | 1475529.13 | (M+H)+      | -3.68                |
| 410.1366 | 1      | 389048.5   | (M+H)+      | -1.96                |
| 411.1338 | 1      | 117840.38  | (M+H)+      | -1.76                |
| 431.1146 | 1      | 57345.16   | (M+Na)+     | 0.52                 |
| 432.1174 | 1      | 14351.31   | (M+Na)+     | 0.76                 |
| 816.2443 | 1      | 3766.16    | 2M+         | 7.8                  |
| 839.2408 | 1      | 110424.12  | (2M+Na)+    | -0.38                |
| 840.2431 | 1      | 56908.58   | (2M+Na)+    | 0.29                 |
| 841.2425 | 1      | 24947.69   | (2M+Na)+    | -0.36                |
| 842.2418 | 1      | 8018.12    | (2M+Na)+    | 1.17                 |

--- End Of Report ---

**<sup>1</sup>H NMR** (2*S*,3*R*,4*S*,5*S*)-2-(4-Aminopyrrolo[2,1-*f*][1,2,4]triazin-7-yl)-5- (2-quinolylsulfanylmethyl)tetrahydrofuran-3,4-diol (**38**)

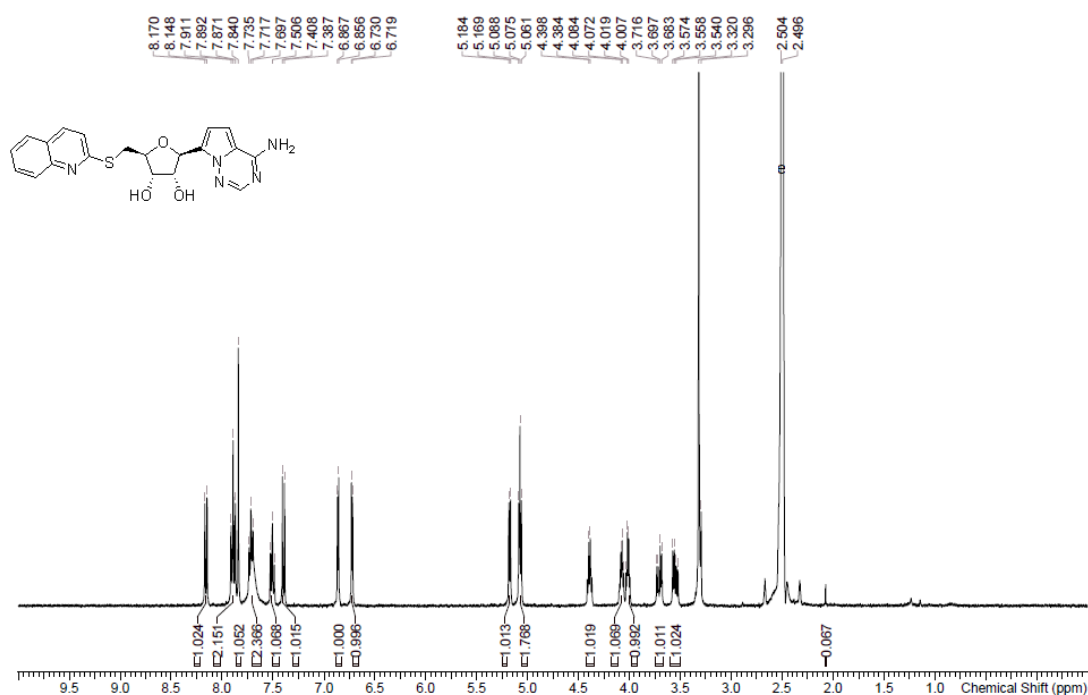

**HPLC** (2*S*,3*R*,4*S*,5*S*)-2-(4-Aminopyrrolo[2,1-*f*][1,2,4]triazin-7-yl)-5- (2-quinolylsulfanylmethyl)tetrahydrofuran-3,4-diol (**38**)

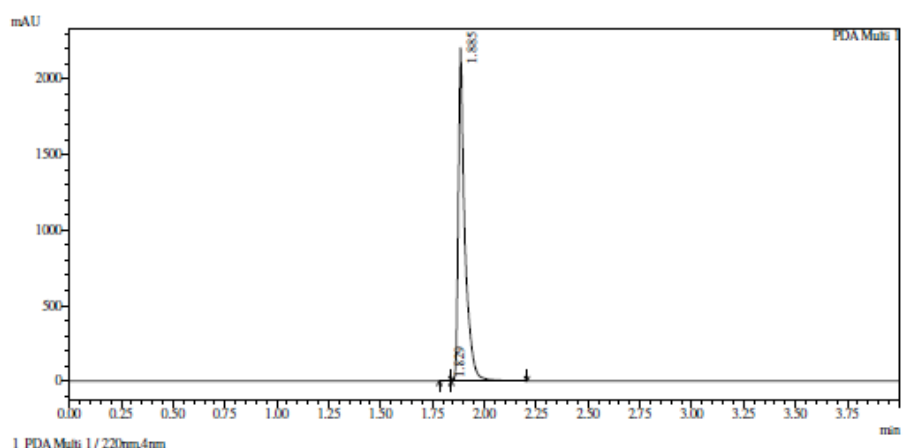

Integration result

| PeakTable |           |           |            |         |         |         |
|-----------|-----------|-----------|------------|---------|---------|---------|
| Peak#     | Ret. Time | USP Width | Resolution | Height  | Area    | Area %  |
| 1         | 1.829     | 0.360     | 0.000      | 2722    | 5049    | 0.105   |
| 2         | 1.885     | 0.052     | 0.270      | 2207403 | 4826089 | 99.895  |
| Total     |           |           |            | 2210125 | 4831138 | 100.000 |

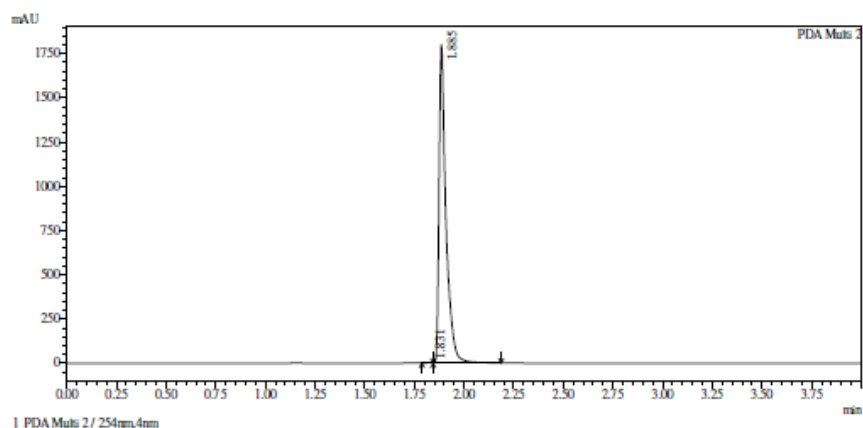

Integration result

| PeakTable |           |           |            |         |         |         |
|-----------|-----------|-----------|------------|---------|---------|---------|
| Peak#     | Ret. Time | USP Width | Resolution | Height  | Area    | Area %  |
| 1         | 1.831     | 0.189     | 0.000      | 3022    | 5723    | 0.131   |
| 2         | 1.885     | 0.058     | 0.443      | 1799424 | 4367031 | 99.869  |
| Total     |           |           |            | 1802446 | 4372754 | 100.000 |

**HRMS** (2*S*,3*R*,4*S*,5*S*)-2-(4-Aminopyrrolo[2,1-*f*][1,2,4]triazin-7-yl)-5- (2-quinolylsulfanylmethyl)tetrahydrofuran-3,4-diol (**38**)

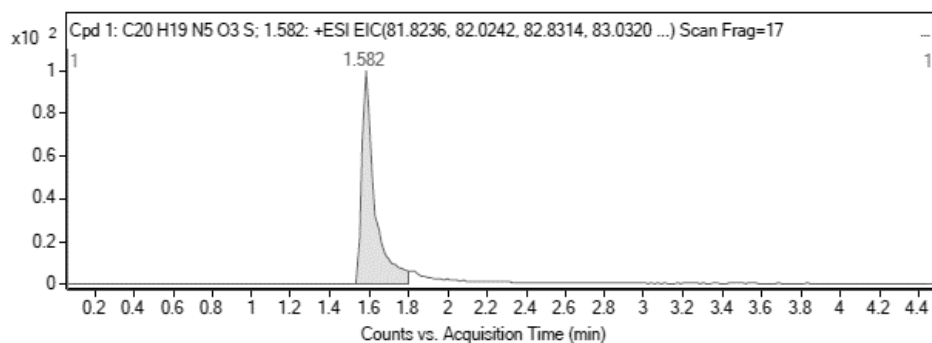

MS Zoomed Spectrum

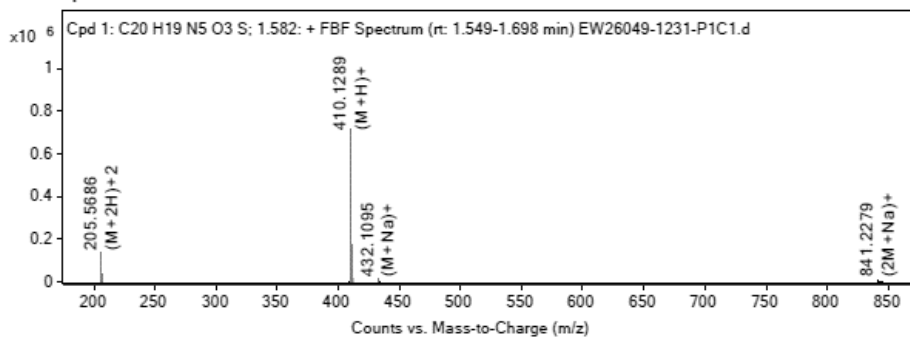

MS Spectrum Peak List

| Obs. m/z | Charge | Abund     | Ion/Isotope          |
|----------|--------|-----------|----------------------|
| 205.5686 | 2      | 131317.02 | (M+2H) <sup>2+</sup> |
| 206.0698 | 2      | 34125.49  | (M+2H) <sup>2+</sup> |

|          |   |                    |
|----------|---|--------------------|
| 206.5683 | 2 | 10675.34[(M+2H)+2] |
| 410.1289 | 1 | 716498[(M+H)+]     |
| 411.1309 | 1 | 176433.63[(M+H)+]  |
| 412.1281 | 1 | 54705.14[(M+H)+]   |
| 432.1095 | 1 | 11102.03[(M+Na)+]  |
| 433.1122 | 1 | 2709.34[(M+Na)+]   |
| 841.2279 | 1 | 8108.4[(2M+Na)+]   |
| 842.2323 | 1 | 4070.93[(2M+Na)+]  |

MS Zoomed Spectrum

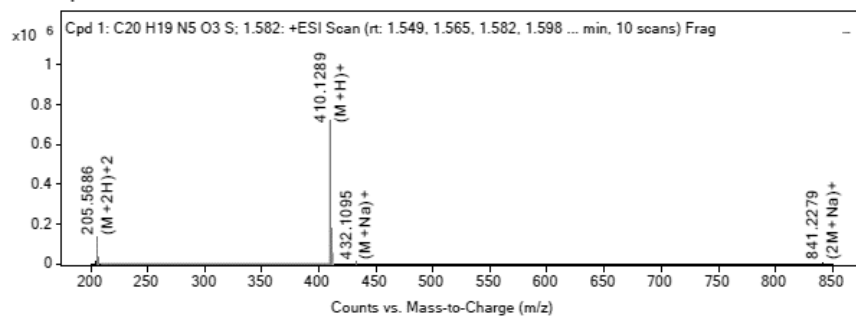

MS Spectrum Peak List

| Obs. m/z | Charge | Abund     | Ion/Isotope | Tgt Mass Error (ppm) |
|----------|--------|-----------|-------------|----------------------|
| 205.5686 | 2      | 131317.02 | [(M+2H)+2]  | -4.52                |
| 206.0698 | 2      | 34125.49  | [(M+2H)+2]  | -3.51                |
| 206.5683 | 2      | 10675.34  | [(M+2H)+2]  | -2.84                |
| 410.1289 | 1      | 716498    | [(M+H)+]    | -1.86                |
| 411.1309 | 1      | 176433.63 | [(M+H)+]    | 0.03                 |
| 412.1281 | 1      | 54705.14  | [(M+H)+]    | -0.05                |
| 432.1095 | 1      | 11102.03  | [(M+Na)+]   | 1.4                  |
| 433.1122 | 1      | 2709.34   | [(M+Na)+]   | 1.65                 |
| 841.2279 | 1      | 8108.4    | [(2M+Na)+]  | 3.56                 |
| 842.2323 | 1      | 4070.93   | [(2M+Na)+]  | 1.65                 |

--- End Of Report ---

<sup>1</sup>H NMR (2S,3R,4S,5S)-5-(4-Aminopyrrolo[2,1-f][1,2,4]triazin-7-yl)-3,4-bis [[tert-butyl(dimethyl)silyl]oxy]tetrahydrofuran-2-carbaldehyde (**122**)

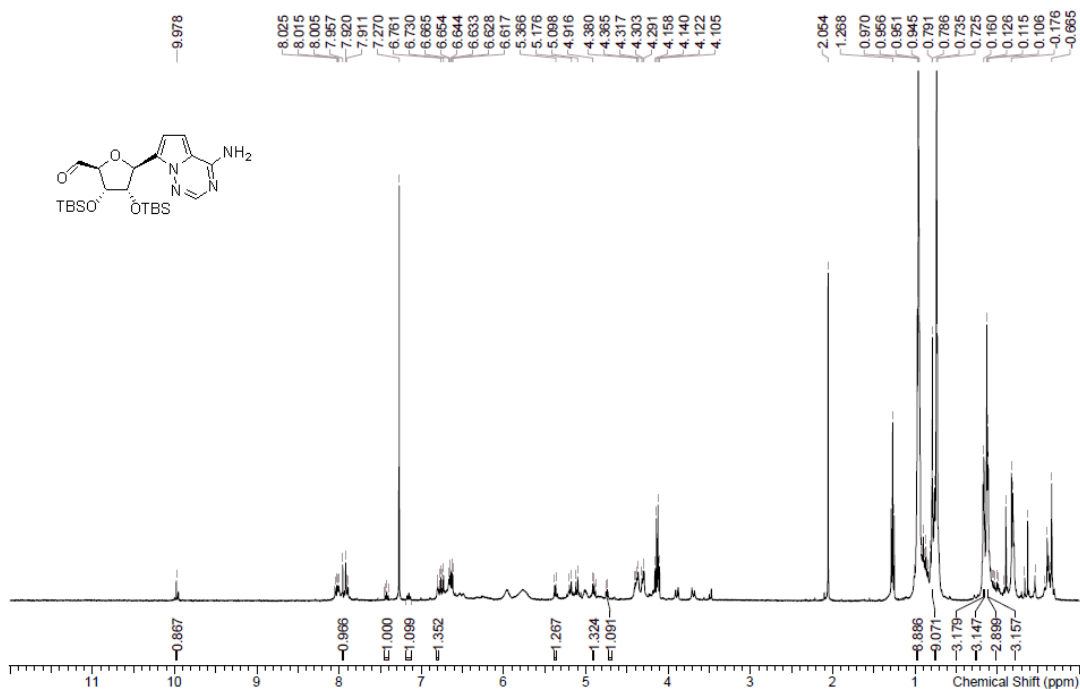

**LCMS (2S,3R,4S,5S)-5-(4-Aminopyrrolo[2,1-f][1,2,4]triazin-7-yl)-3,4-bis [[tert-butyl(dimethyl)silyl]oxy]tetrahydrofuran-2-carbaldehyde (**122**)**

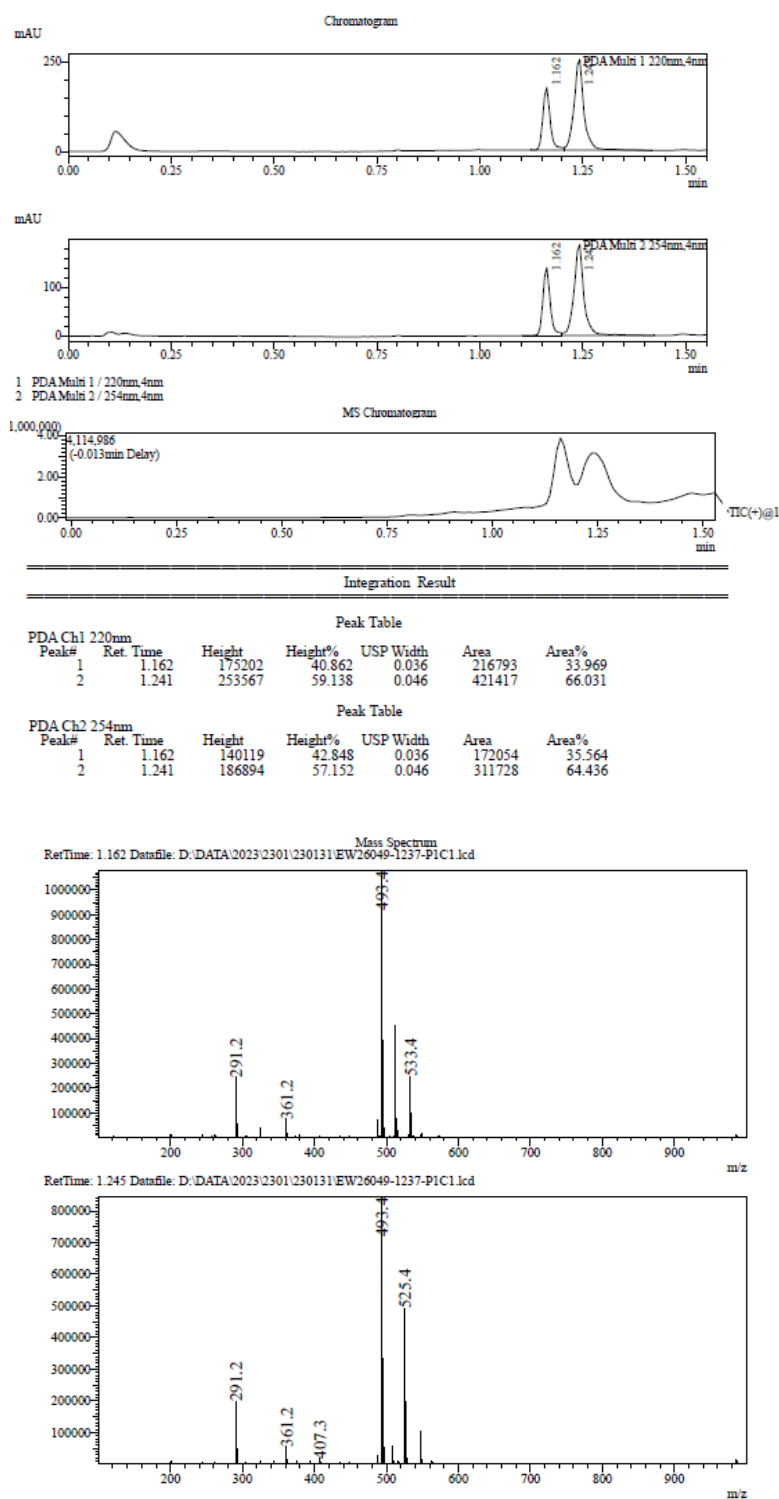

**<sup>1</sup>H NMR 7-[(2*S*,3*S*,4*R*,5*R*)-5-[(*E*)-2-(1,3-Benzothiazol-2-yl)vinyl]-3,4-bis [[tert-butyl(dimethyl)silyl]oxy]tetrahydrofuran-2-yl]pyrrolo[2,1-*f*][1,2,4]triazin-4-amine (123)**

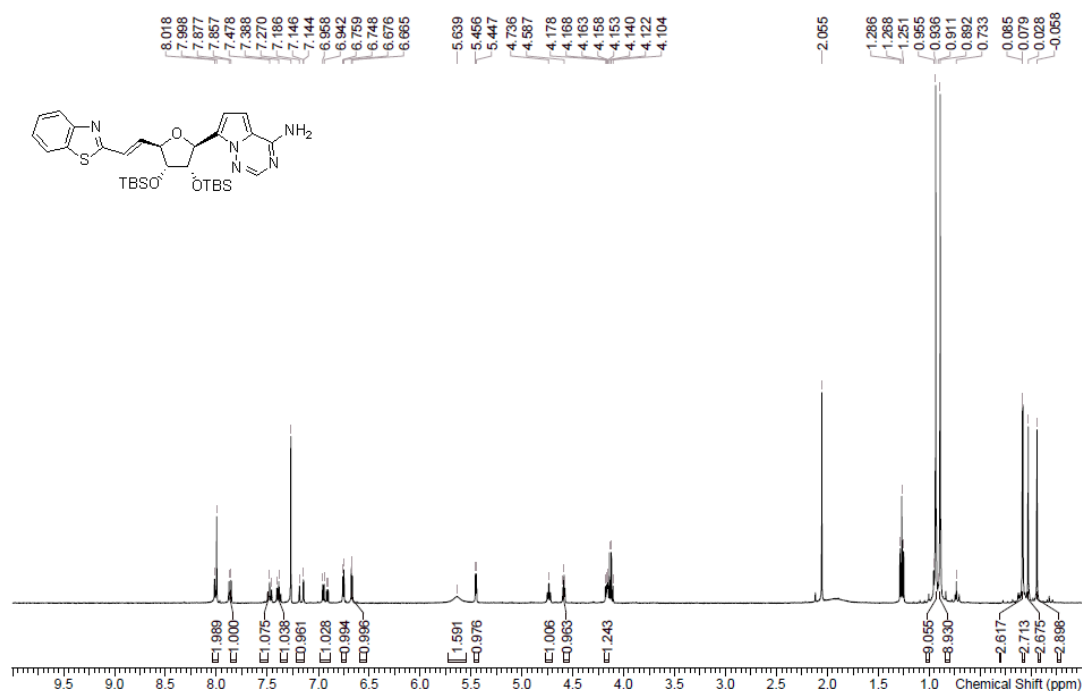

**LCMS 7-[(2*S*,3*S*,4*R*,5*R*)-5-[(*E*)-2-(1,3-Benzothiazol-2-yl)vinyl]-3,4-bis [[tert-butyl(dimethyl)silyl]oxy]tetrahydrofuran-2-yl]pyrrolo[2,1-*f*][1,2,4]triazin-4-amine (123)**

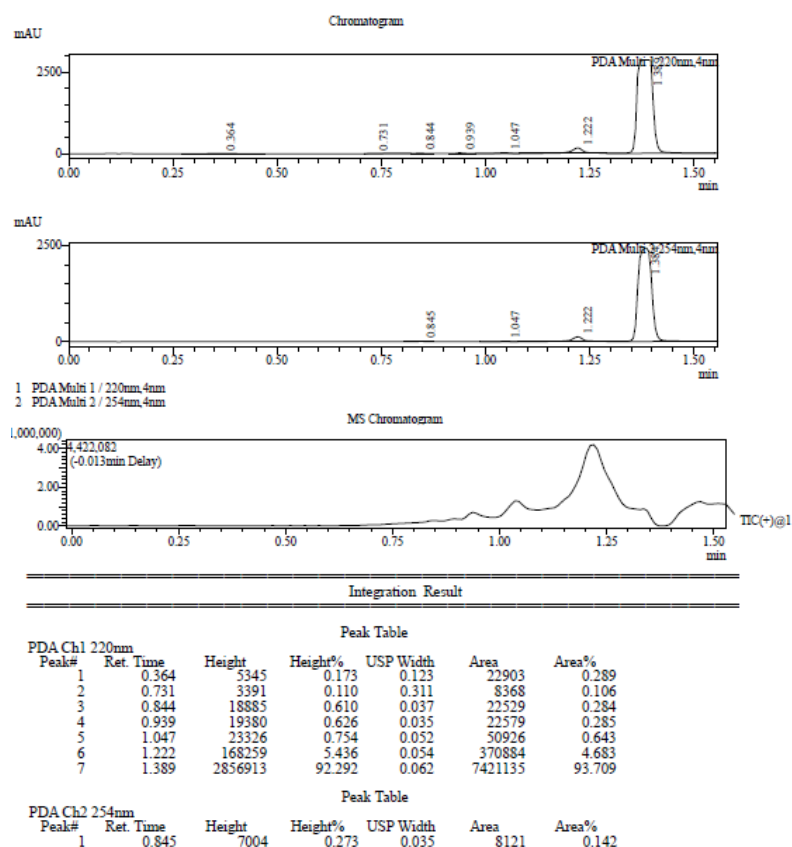

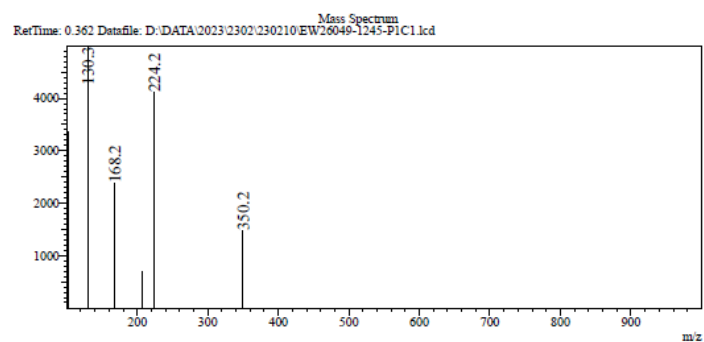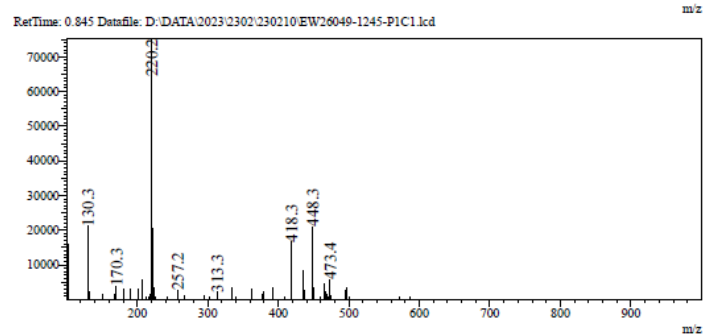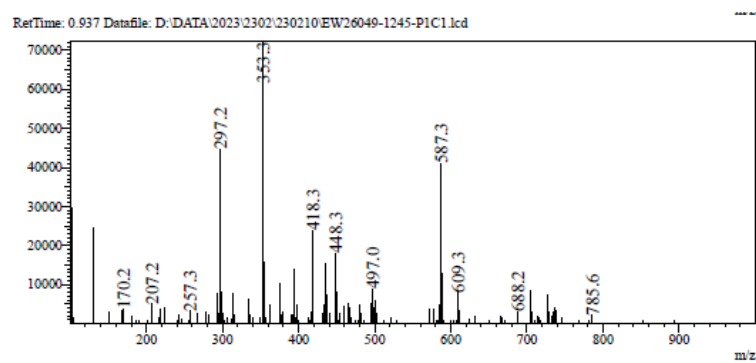

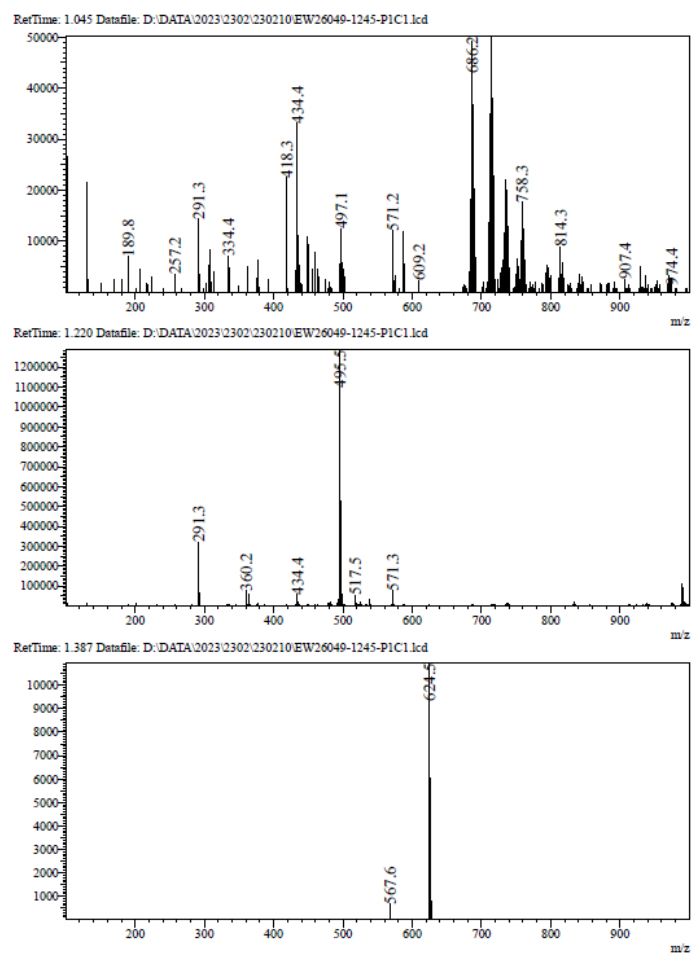

$^1\text{H}$  NMR (2S,3R,4S,5R)-2-(4-aminopyrrolo[2,1-f][1,2,4]triazin-7-yl)-5-[(E)-2-(1,3-benzothiazol-2-yl)vinyl]tetrahydrofuran-3,4-diol (**40**)

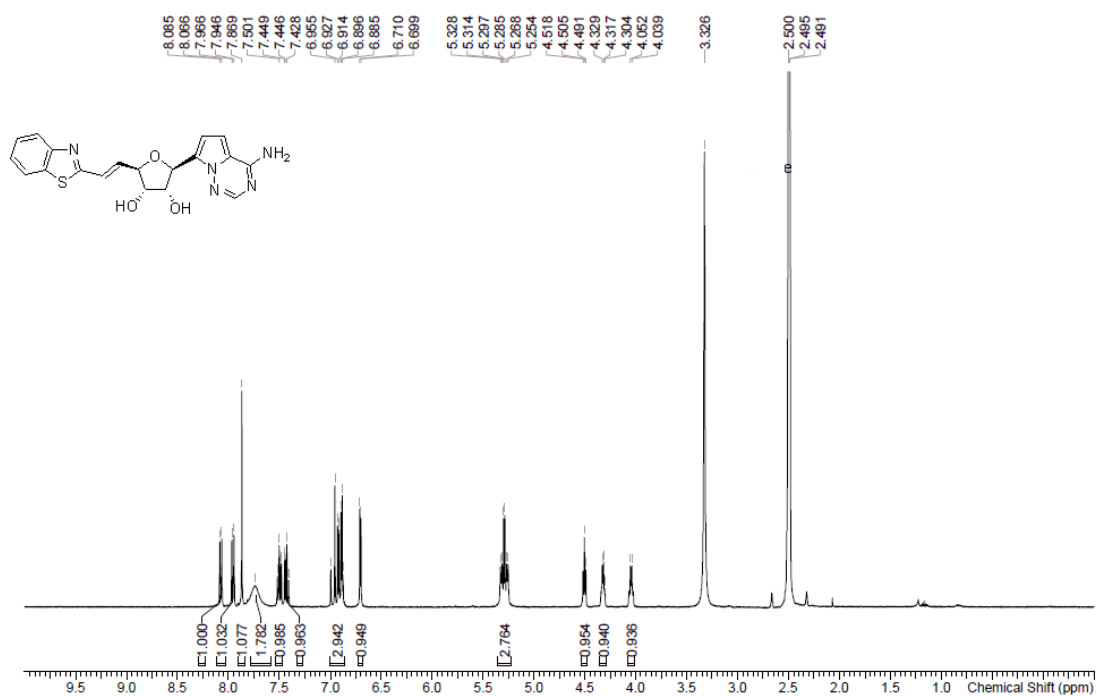



**HPLC (2S,3R,4S,5R)-2-(4-aminopyrrolo[2,1-f][1,2,4]triazin-7-yl)-5-[(E)-2-(1,3-benzothiazol-2-yl)vinyl]tetrahydrofuran-3,4-diol (**40**)**

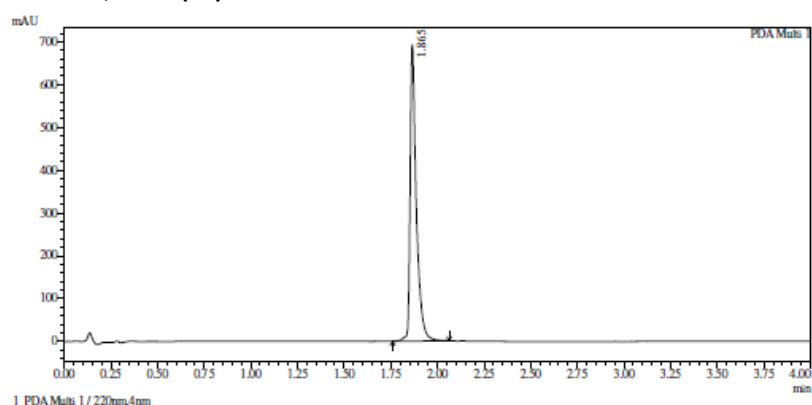

Integration result

| PeakTable |           |           |            |        |         |         |
|-----------|-----------|-----------|------------|--------|---------|---------|
| Peak#     | Ret. Time | USP Width | Resolution | Height | Area    | Area %  |
| 1         | 1.865     | 0.055     | 0.000      | 692840 | 1597361 | 100.000 |
| Total     |           |           |            | 692840 | 1597361 | 100.000 |

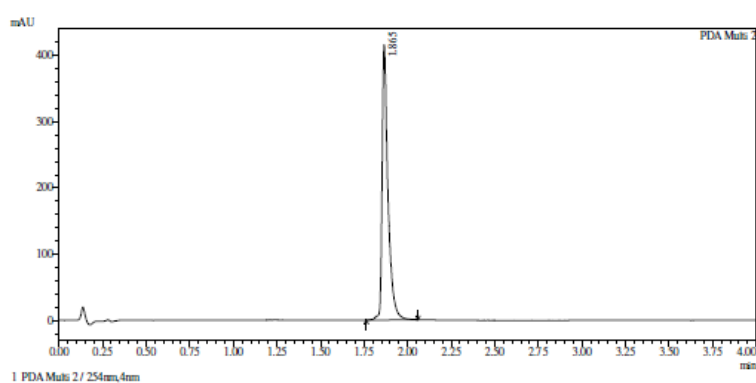

Integration result

| PeakTable |           |           |            |        |        |         |
|-----------|-----------|-----------|------------|--------|--------|---------|
| Peak#     | Ret. Time | USP Width | Resolution | Height | Area   | Area %  |
| 1         | 1.865     | 0.056     | 0.000      | 415790 | 978971 | 100.000 |
| Total     |           |           |            | 415790 | 978971 | 100.000 |

**HRMC (2S,3R,4S,5R)-2-(4-aminopyrrolo[2,1-f][1,2,4]triazin-7-yl)-5-[(E)-2-(1,3-benzothiazol-2-yl)vinyl]tetrahydrofuran-3,4-diol (**40**)**

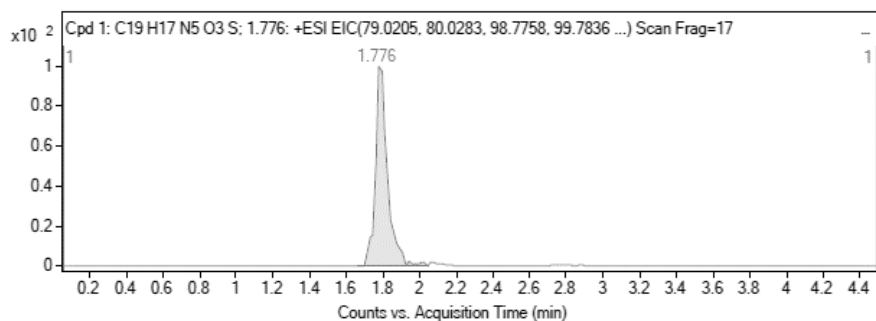

MS Zoomed Spectrum

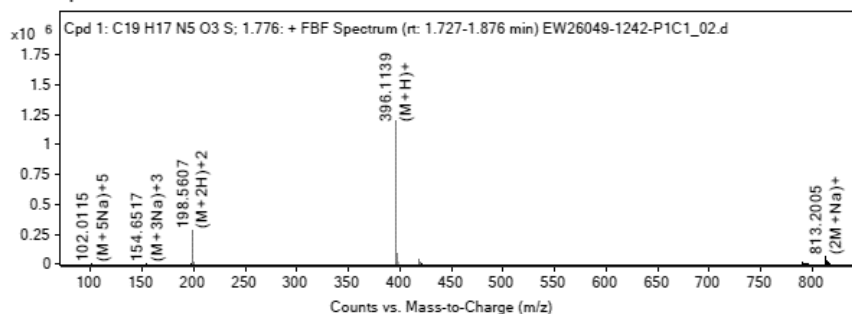

MS Spectrum Peak List

| Obs. m/z | Charge | Abund     | Ion/Isotope |
|----------|--------|-----------|-------------|
| 198.5607 | 2      | 273549.53 | (M+2H)+2    |

|          |   |            |          |
|----------|---|------------|----------|
| 199.0618 | 2 | 66969.58   | (M+2H)+2 |
| 199.5605 | 2 | 21584.39   | (M+2H)+2 |
| 396.1139 | 1 | 1196108.75 | (M+H)+   |
| 397.1119 | 1 | 286005.56  | (M+H)+   |
| 398.1113 | 1 | 87600.13   | (M+H)+   |
| 418.0943 | 1 | 42684.21   | (M+Na)+  |
| 813.2005 | 1 | 55999.89   | (2M+Na)+ |
| 814.2029 | 1 | 26855.9    | (2M+Na)+ |
| 815.2003 | 1 | 12059.15   | (2M+Na)+ |

MS Zoomed Spectrum

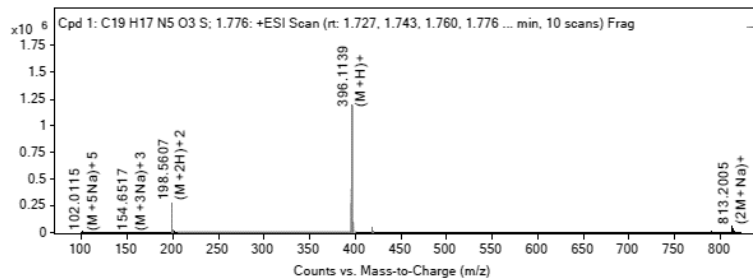

MS Spectrum Peak List

| Obs. m/z | Charge | Abund      | Ion/Isotope | Tgt Mass Error (ppm) |
|----------|--------|------------|-------------|----------------------|
| 198.5607 | 2      | 273549.53  | (M+2H)+2    | -4.18                |
| 199.0618 | 2      | 66969.58   | (M+2H)+2    | -2.82                |
| 199.5605 | 2      | 21584.39   | (M+2H)+2    | -3.51                |
| 396.1139 | 1      | 1196108.75 | (M+H)+      | -3.56                |
| 397.1119 | 1      | 286005.56  | (M+H)+      | -2.02                |
| 398.1113 | 1      | 87600.13   | (M+H)+      | -1.76                |
| 418.0943 | 1      | 42684.21   | (M+Na)+     | 0.24                 |
| 813.2005 | 1      | 55999.89   | (2M+Na)+    | -1.04                |
| 814.2029 | 1      | 26855.9    | (2M+Na)+    | -0.55                |
| 815.2003 | 1      | 12059.15   | (2M+Na)+    | 0.78                 |

--- End Of Report ---

**<sup>1</sup>H NMR** 7-((2*S*,3*S*,4*R*,5*R*)-5-(2-(benzo[d]thiazol-2-yl)ethyl)-3,4-bis((tert-butyl dimethylsilyl)oxy)tetrahydrofuran-2-yl)pyrrolo[2,1-*f*][1,2,4]triazin-4-amine (**124**)

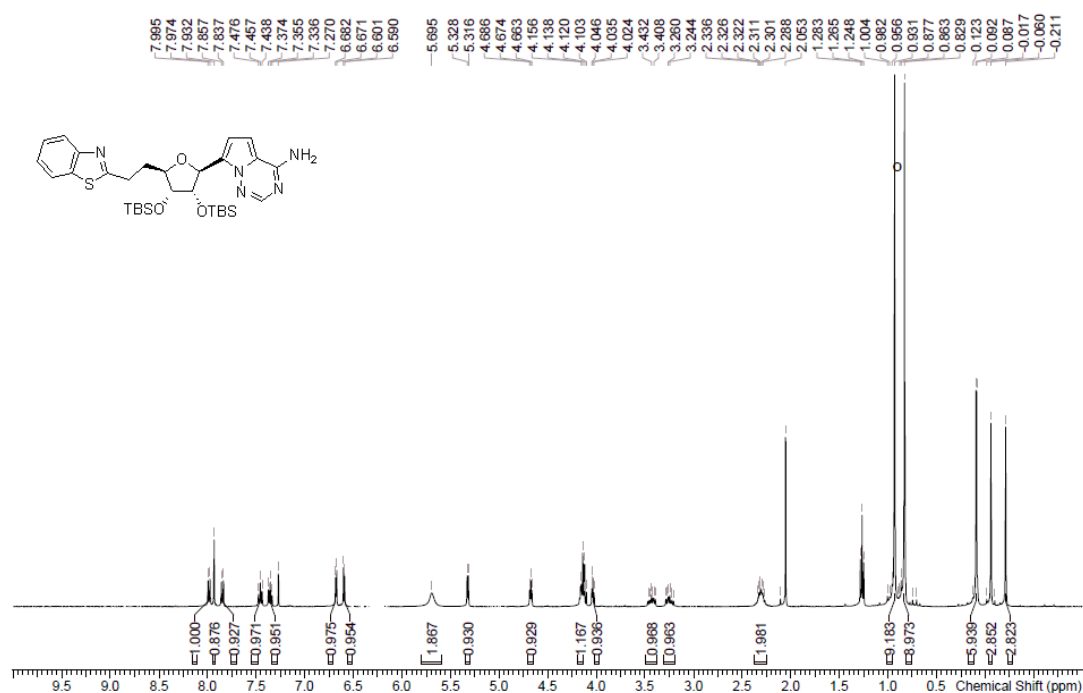

**LCMS** 7-((2*S*,3*S*,4*R*,5*R*)-5-(2-(benzo[d]thiazol-2-yl)ethyl)-3,4-bis((tert-butyl dimethylsilyl)oxy)tetrahydrofuran-2-yl)pyrrolo[2,1-*f*][1,2,4]triazin-4-amine (**124**)

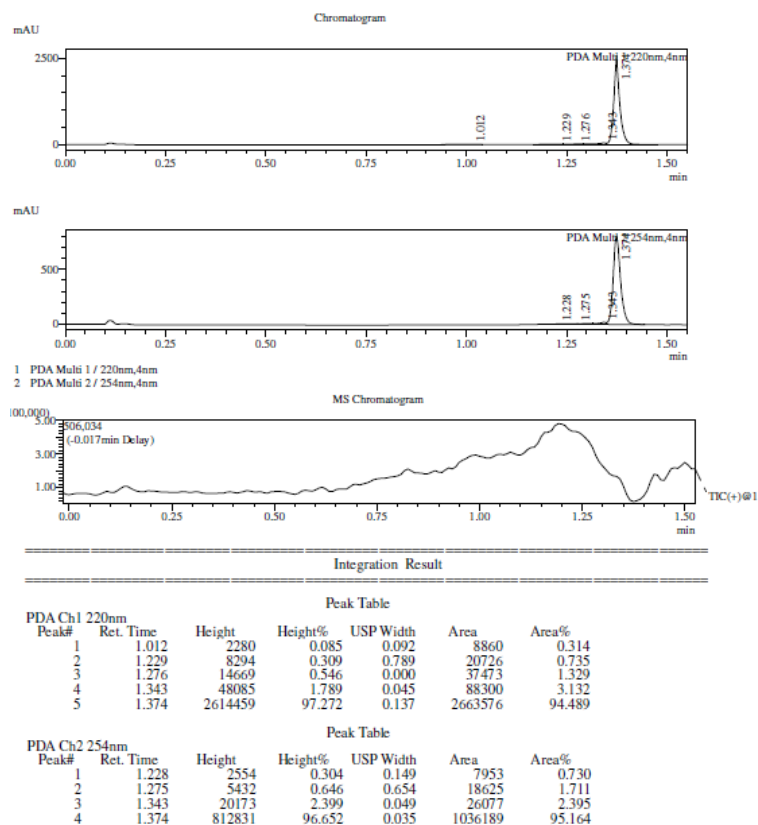

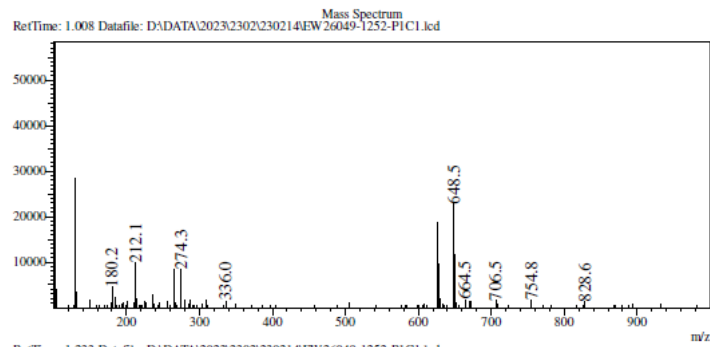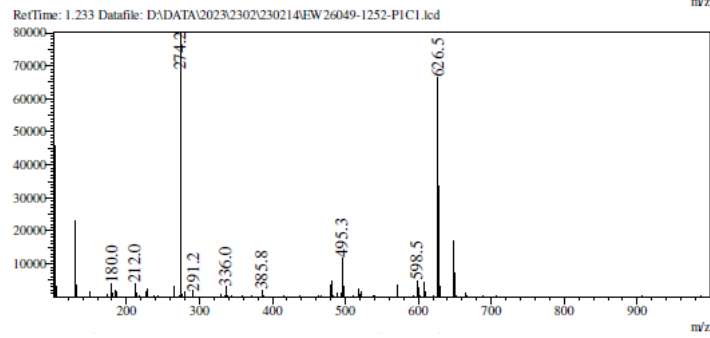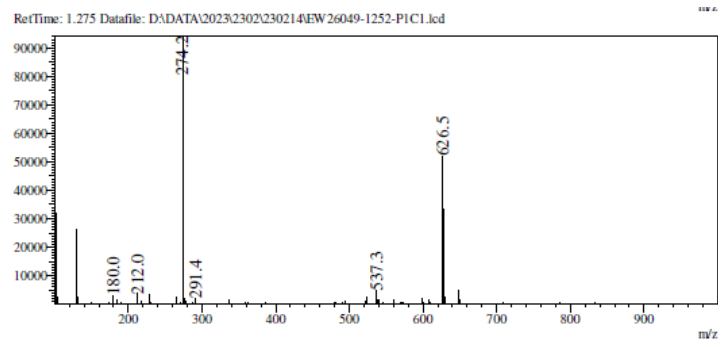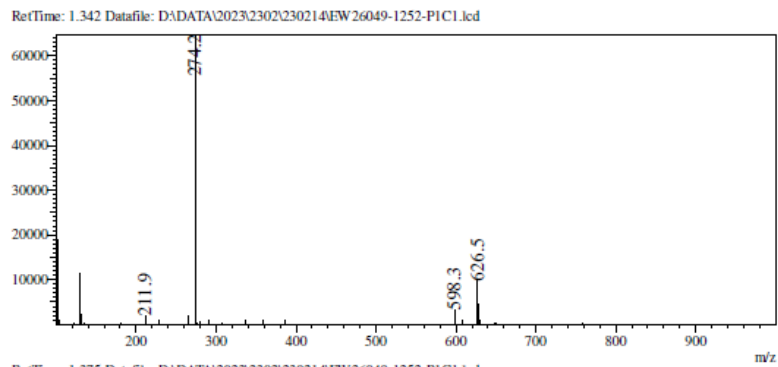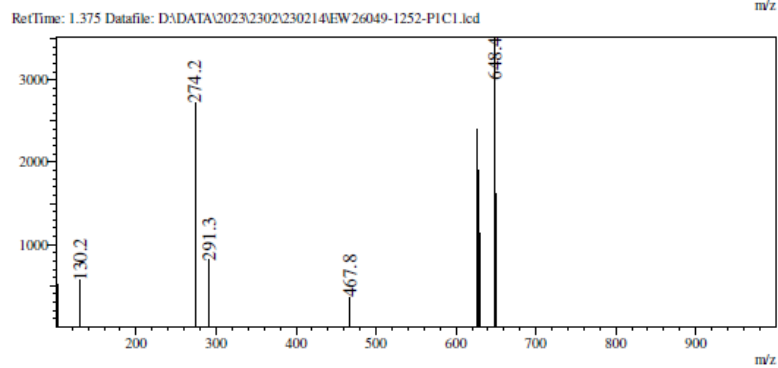

**<sup>1</sup>H NMR** (2*S*,3*R*,4*S*,5*R*)-2-(4-Aminopyrrolo[2,1-*f*][1,2,4]triazin-7-yl)-5-[2-(1,3-benzothiazol-2-yl)ethyl]tetrahydrofuran-3,4-diol (**39**)

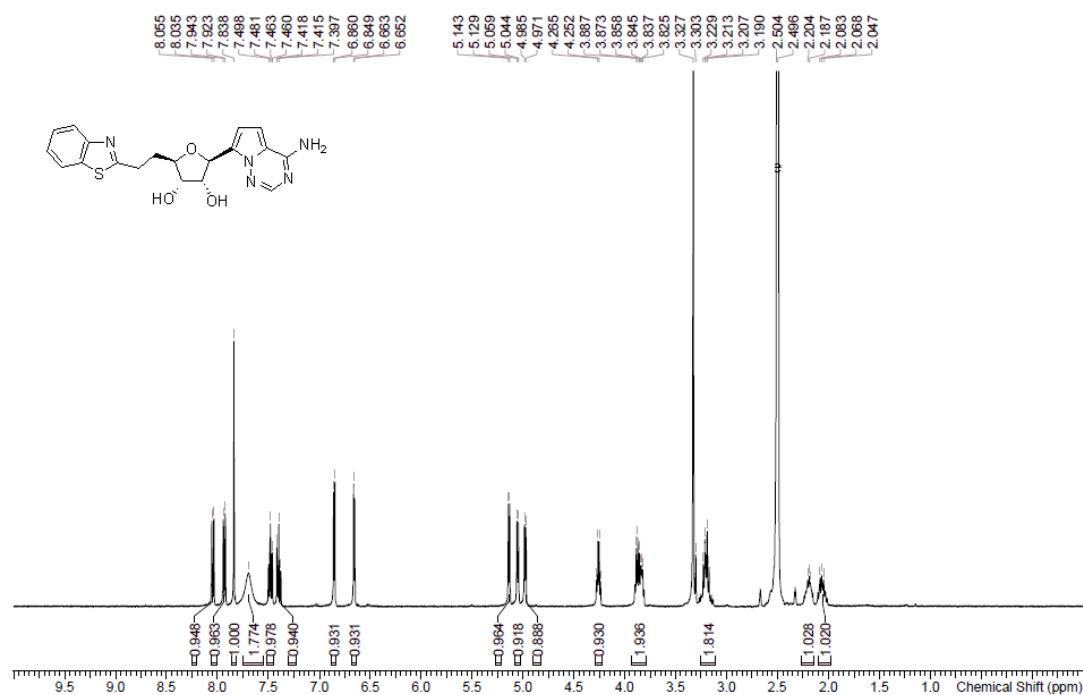

**<sup>13</sup>C NMR** (2*S*,3*R*,4*S*,5*R*)-2-(4-Aminopyrrolo[2,1-*f*][1,2,4]triazin-7-yl)-5-[2-(1,3-benzothiazol-2-yl)ethyl]tetrahydrofuran-3,4-diol (**39**)

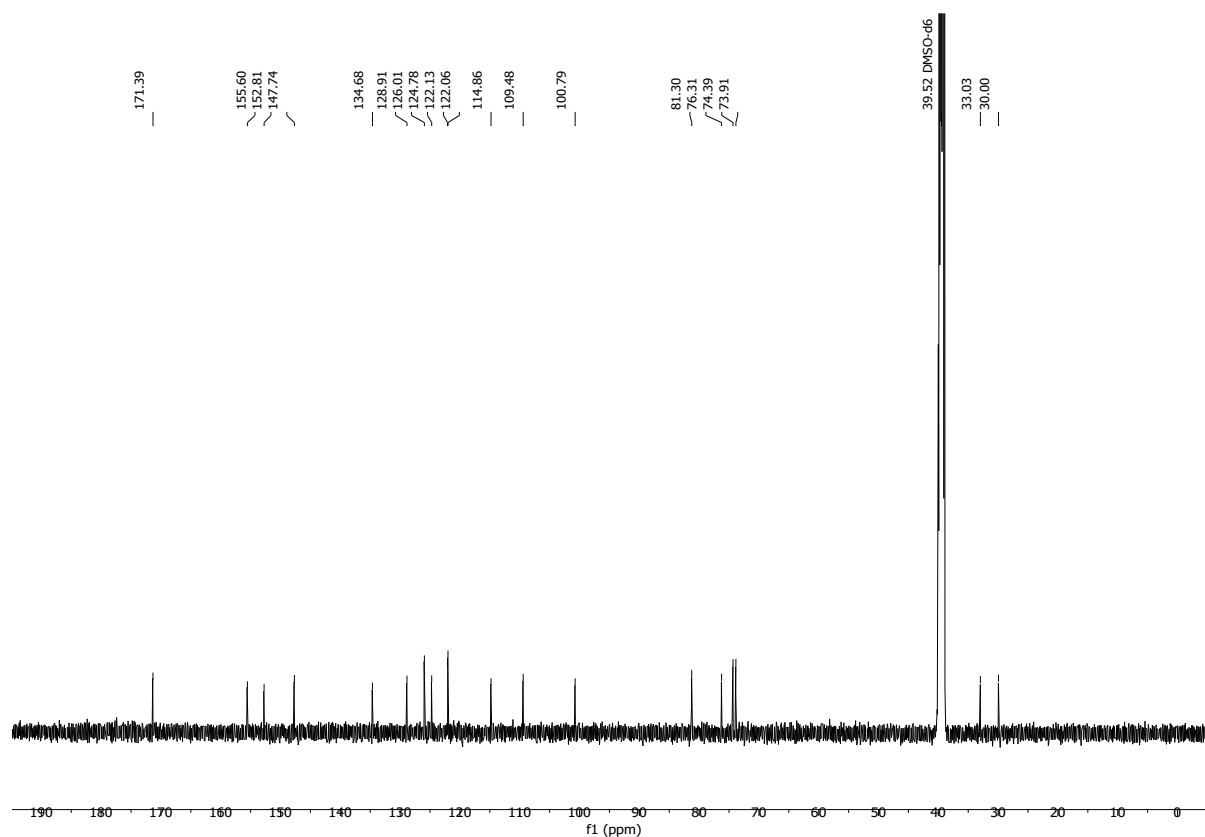

**HPLC** (2*S*,3*R*,4*S*,5*R*)-2-(4-Aminopyrrolo[2,1-*f*][1,2,4]triazin-7-yl)-5-[2-(1,3-benzothiazol-2-yl)ethyl]tetrahydrofuran-3,4-diol (**39**)

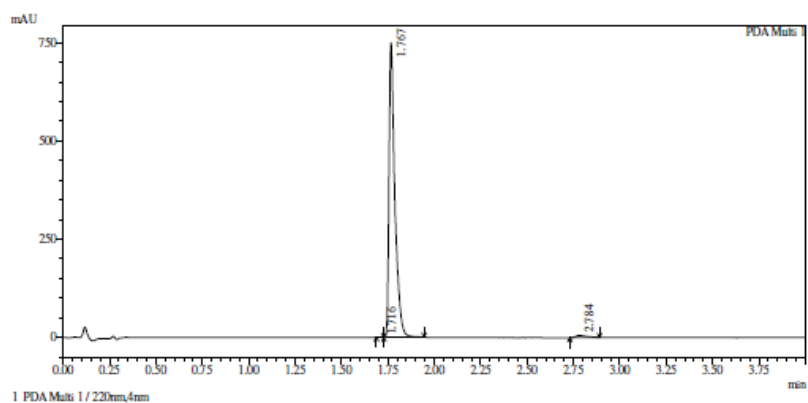

Integration result

| PeakTable     |           |           |            |        |         |         |
|---------------|-----------|-----------|------------|--------|---------|---------|
| PDA Ch1 220nm |           |           |            |        |         |         |
| Peak#         | Ret. Time | USP Width | Resolution | Height | Area    | Area %  |
| 1             | 1.716     | 0.000     | 0.000      | 999    | 1596    | 0.096   |
| 2             | 1.767     | 0.054     | 0.000      | 749570 | 1640868 | 98.651  |
| 3             | 2.784     | 0.110     | 12.387     | 5120   | 20847   | 1.253   |
| Total         |           |           |            | 755689 | 1663311 | 100.000 |

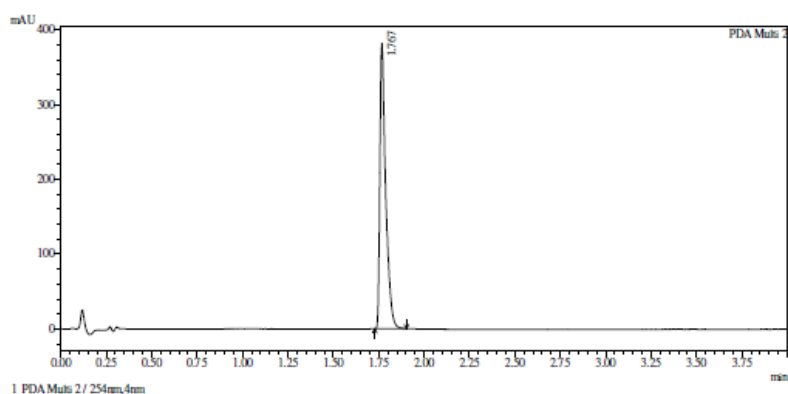

Integration result

| PeakTable     |           |           |            |        |        |         |
|---------------|-----------|-----------|------------|--------|--------|---------|
| PDA Ch2 254nm |           |           |            |        |        |         |
| Peak#         | Ret. Time | USP Width | Resolution | Height | Area   | Area %  |
| 1             | 1.767     | 0.056     | 0.000      | 381870 | 856790 | 100.000 |
| Total         |           |           |            | 381870 | 856790 | 100.000 |

**HRMS** (2*S*,3*R*,4*S*,5*R*)-2-(4-Aminopyrrolo[2,1-*f*][1,2,4]triazin-7-yl)-5-[2-(1,3-benzothiazol-2-yl)ethyl]tetrahydrofuran-3,4-diol (**39**)

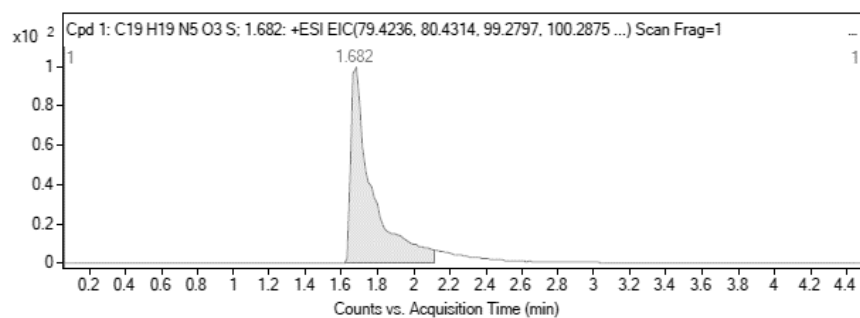

MS Zoomed Spectrum

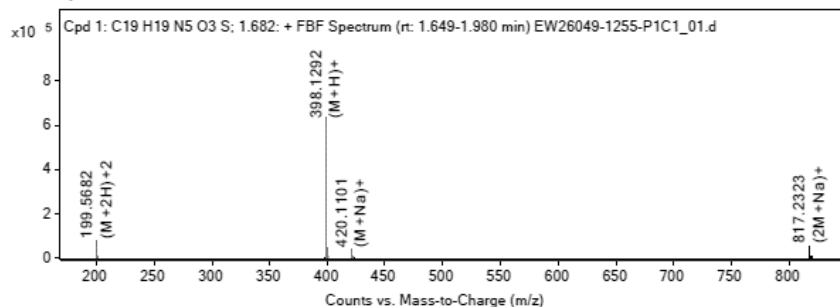

MS Spectrum Peak List

| Obs. m/z | Charge | Abund    | Ion/Isotope |
|----------|--------|----------|-------------|
| 199.5682 | 2      | 75111.74 | (M+2H)+2    |

|          |   |           |          |
|----------|---|-----------|----------|
| 200.0695 | 2 | 18732.5   | (M+2H)+2 |
| 398.1292 | 1 | 633819.06 | (M+H)+   |
| 399.1313 | 1 | 152739.59 | (M+H)+   |
| 400.1286 | 1 | 46530.06  | (M+H)+   |
| 420.1101 | 1 | 41638.2   | (M+Na)+  |
| 421.1129 | 1 | 10103.08  | (M+Na)+  |
| 817.2323 | 1 | 54105.62  | (2M+Na)+ |
| 818.2347 | 1 | 26256.96  | (2M+Na)+ |
| 819.2327 | 1 | 11576.3   | (2M+Na)+ |

MS Zoomed Spectrum

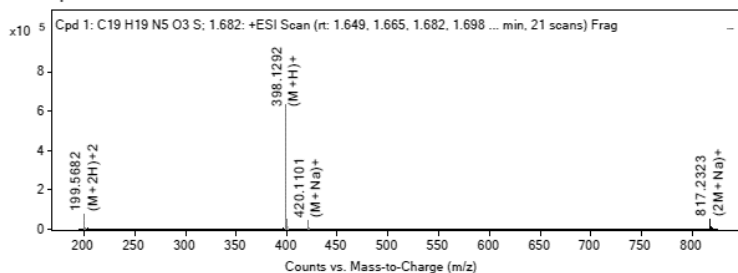

MS Spectrum Peak List

| Obs. m/z | Charge | Abund     | Ion/Isotope | Tgt Mass Error (ppm) |
|----------|--------|-----------|-------------|----------------------|
| 199.5682 | 2      | 75111.74  | (M+2H)+2    | -2.59                |
| 200.0695 | 2      | 18732.5   | (M+2H)+2    | -1.85                |
| 398.1292 | 1      | 633819.06 | (M+H)+      | -2.6                 |
| 399.1313 | 1      | 152739.59 | (M+H)+      | -1.00                |
| 400.1286 | 1      | 46530.06  | (M+H)+      | -1.74                |
| 420.1101 | 1      | 41638.2   | (M+Na)+     | -0.06                |
| 421.1129 | 1      | 10103.08  | (M+Na)+     | -0.1                 |
| 817.2323 | 1      | 54105.62  | (2M+Na)+    | -1.61                |
| 818.2347 | 1      | 26256.96  | (2M+Na)+    | -1.2                 |
| 819.2327 | 1      | 11576.3   | (2M+Na)+    | -0.36                |

— End Of Report —
